# Supplementary material for: Subtype-associated epigenomic landscape and 3D genome structure in bladder cancer
Source: Genome Biol. 2021 Apr 15;22:105. doi: 10.1186/s13059-021-02325-y (PMC8048365; doi:10.1186/s13059-021-02325-y)
Supplement: Supplementary file 1 — Additional file 1: Table S1. Classification results for each sample using consensusMIBC. [file 13059_2021_2325_MOESM1_ESM.xlsx]

## Sheet: Table S1-consensusMIBC_results
Supplementary Table S1: Classification results for each sample using consensusMIBC
sample	Class	P Value
RT4_rep1	Luminal papillary	3.05e-66
RT4_rep2	Luminal papillary	2.22e-57
SW780_rep1	Luminal papillary	5.31e-58
SW780_rep2	Luminal papillary	6.18e-61
HT1376_rep1	Basal/squamous	4.24e-47
HT1376_rep2	Basal/squamous	1.53e-48
SCABER_rep1	Basal/squamous	6.7e-48
SCABER_rep2	Basal/squamous	7.49e-43
Tumor1	Luminal papillary	1.13e-126
Tumor3	Stroma-rich	4.46e-66
Tumor4	Basal/squamous	1.41e-94
Tumor5	Basal/squamous	1.76e-75
