# Supplementary material for: Subtype-associated epigenomic landscape and 3D genome structure in bladder cancer
Source: Genome Biol. 2021 Apr 15;22:105. doi: 10.1186/s13059-021-02325-y (PMC8048365; doi:10.1186/s13059-021-02325-y)
Supplement: Supplementary file 7 — Additional file 7: Table S6. H3K27ac ChIP-Seq peaks called in each cell line and its proximal/distal location w.r.t transcription start site (TSS). [file 13059_2021_2325_MOESM7_ESM.xlsx]

## Sheet: Table S6-H3K27ac ChIPSeq Peak
Supplementary Table S6: H3K27ac ChIP-Seq peaks called in each cell line and its proximal/distal location w.r.t transcription start site (TSS)
	Cell Line	Total Peaks	Proximal	Distal	%Proximal	%Distal			Tissue	Total Peaks
	RT4	69473	16261	53212	0.234062	0.765938			T1	108821
	SW780	40731	15594	25137	0.382853	0.617147			T3	91786
	SCABER	78506	20676	57830	0.263368	0.736632			T4	66683
	HT1376	49154	15076	34078	0.30671	0.69329			T5	84405
	Average	59466			0.296748	0.703252
	RT4 H3K27ac Peaks					SW780 H3K27ac Peaks					SCABER H3K27ac Peaks					HT1376 H3K27ac Peaks					T1 H3K27ac Peaks					T3 H3K27ac Peaks					T4 H3K27ac Peaks					T5 H3K27ac Peaks
	chr	start	end	ID		chr	start	end	ID		chr	start	end	ID		chr	start	end	ID		chr	start	end	ID		chr	start	end	ID		chr	start	end	ID		chr	start	end	ID
	chr1	13392	13599	RT4_K27ac_1		chr1	713799	714033	SW_K27ac_1		chr1	713751	714145	SC_K27ac_1		chr1	713282	715578	HT1376_K27ac_1		chr1	713451	714886	T1_H3K27ac_1_1		chr6	89787879	89793887	T3_H3K27ac_1		chr8	38237202	38244966	T4_H3K27ac_1		chr12	30945012	30950831	T5_H3K27ac_1
	chr1	523658	523887	RT4_K27ac_2		chr1	714361	714649	SW_K27ac_2		chr1	714283	714748	SC_K27ac_2		chr1	755238	755983	HT1376_K27ac_2		chr1	715049	715545	T1_H3K27ac_1_2		chr19	47608156	47617847	T3_H3K27ac_2		chr19	47612539	47617796	T4_H3K27ac_2		chr12	31474614	31480498	T5_H3K27ac_2
	chr1	713491	715521	RT4_K27ac_3		chr1	762398	762945	SW_K27ac_3		chr1	762161	763119	SC_K27ac_3		chr1	762145	763215	HT1376_K27ac_3		chr1	730804	730985	T1_H3K27ac_1_3		chr15	45001958	45007521	T3_H3K27ac_3		chr3	156875850	156879354	T4_H3K27ac_3		chr19	47612508	47618417	T5_H3K27ac_3
	chr1	762140	763184	RT4_K27ac_4		chr1	894102	894636	SW_K27ac_4		chr1	893885	894640	SC_K27ac_4		chr1	839768	840221	HT1376_K27ac_4		chr1	731151	731383	T1_H3K27ac_1_4		chr2	201725766	201730896	T3_H3K27ac_4		chr6	30456387	30459295	T4_H3K27ac_4		chr2	201725946	201730300	T5_H3K27ac_4
	chr1	780144	780312	RT4_K27ac_5		chr1	901664	902400	SW_K27ac_5		chr1	895372	895923	SC_K27ac_5		chr1	868384	868879	HT1376_K27ac_5		chr1	743306	743775	T1_H3K27ac_1_5		chr1	234734180	234750407	T3_H3K27ac_5		chr1	234737573	234745483	T4_H3K27ac_5		chr15	45001850	45007545	T5_H3K27ac_5
	chr1	780665	781345	RT4_K27ac_6		chr1	911379	911881	SW_K27ac_6		chr1	901200	902835	SC_K27ac_6		chr1	893891	894662	HT1376_K27ac_6		chr1	752062	752421	T1_H3K27ac_1_6		chr17	62499369	62504188	T3_H3K27ac_6		chr20	34328663	34332734	T4_H3K27ac_6		chr12	6796946	6799651	T5_H3K27ac_6
	chr1	793555	794407	RT4_K27ac_7		chr1	930908	931302	SW_K27ac_7		chr1	911164	911816	SC_K27ac_7		chr1	901341	902741	HT1376_K27ac_7		chr1	753209	753539	T1_H3K27ac_1_7		chr10	3816226	3829289	T3_H3K27ac_7		chr6	89788532	89792983	T4_H3K27ac_7		chr12	6440399	6452252	T5_H3K27ac_7
	chr1	839666	840742	RT4_K27ac_8		chr1	931578	931850	SW_K27ac_8		chr1	919715	919914	SC_K27ac_8		chr1	910915	912100	HT1376_K27ac_8		chr1	762004	763259	T1_H3K27ac_1_8		chr4	103743194	103750980	T3_H3K27ac_8		chr4	103745480	103750761	T4_H3K27ac_8		chr6	32819075	32824304	T5_H3K27ac_8
	chr1	867708	867940	RT4_K27ac_9		chr1	934383	936332	SW_K27ac_9		chr1	934554	935485	SC_K27ac_9		chr1	934509	937301	HT1376_K27ac_9		chr1	764479	764808	T1_H3K27ac_1_9		chr1	150543903	150553292	T3_H3K27ac_9		chr22	38900584	38903580	T4_H3K27ac_9		chr10	3816738	3827499	T5_H3K27ac_9
	chr1	868450	869201	RT4_K27ac_10		chr1	936463	937458	SW_K27ac_10		chr1	935544	937625	SC_K27ac_10		chr1	942700	943007	HT1376_K27ac_10		chr1	876124	876603	T1_H3K27ac_1_10		chr2	28971955	28978906	T3_H3K27ac_10		chr15	45002139	45007132	T4_H3K27ac_10		chr6	89788321	89793859	T5_H3K27ac_10
	chr1	893994	894658	RT4_K27ac_11		chr1	941415	942049	SW_K27ac_11		chr1	940228	942599	SC_K27ac_11		chr1	948083	949597	HT1376_K27ac_11		chr1	877464	878146	T1_H3K27ac_1_11		chr9	131899183	131906902	T3_H3K27ac_11		chr8	101961655	101966256	T4_H3K27ac_11		chr12	8178476	8180303	T5_H3K27ac_11
	chr1	895819	896408	RT4_K27ac_12		chr1	942242	942510	SW_K27ac_12		chr1	948086	950469	SC_K27ac_12		chr1	954985	956969	HT1376_K27ac_12		chr1	878886	879277	T1_H3K27ac_1_12		chr8	101960675	101966562	T3_H3K27ac_12		chr2	178075770	178079072	T4_H3K27ac_12		chr7	26237918	26242506	T5_H3K27ac_12
	chr1	901658	902407	RT4_K27ac_13		chr1	948193	948768	SW_K27ac_13		chr1	950562	950846	SC_K27ac_13		chr1	960231	960926	HT1376_K27ac_13		chr1	895880	896045	T1_H3K27ac_1_13		chr1	204378232	204384552	T3_H3K27ac_13		chr17	39843584	39846584	T4_H3K27ac_13		chr9	132242678	132256084	T5_H3K27ac_13
	chr1	906779	907248	RT4_K27ac_14		chr1	948896	949360	SW_K27ac_14		chr1	955009	955268	SC_K27ac_14		chr1	994488	994970	HT1376_K27ac_14		chr1	896364	896529	T1_H3K27ac_1_14		chr12	122235276	122245071	T3_H3K27ac_14		chr16	2827275	2828794	T4_H3K27ac_14		chr12	92530242	92539679	T5_H3K27ac_14
	chr1	911606	912019	RT4_K27ac_15		chr1	955052	955285	SW_K27ac_15		chr1	955543	957831	SC_K27ac_15		chr1	999376	999742	HT1376_K27ac_15		chr1	901215	903678	T1_H3K27ac_1_15		chr14	69244849	69264726	T3_H3K27ac_15		chr17	48942137	48945951	T4_H3K27ac_15		chr9	33023705	33026680	T5_H3K27ac_15
	chr1	934477	936220	RT4_K27ac_16		chr1	955506	957786	SW_K27ac_16		chr1	957998	958387	SC_K27ac_16		chr1	1004795	1005697	HT1376_K27ac_16		chr1	934401	935451	T1_H3K27ac_1_16		chr3	156876136	156879746	T3_H3K27ac_16		chr12	122235363	122242079	T4_H3K27ac_16		chr15	93425914	93428811	T5_H3K27ac_16
	chr1	948156	949316	RT4_K27ac_17		chr1	959242	960050	SW_K27ac_17		chr1	958998	961841	SC_K27ac_17		chr1	1008433	1010184	HT1376_K27ac_17		chr1	935623	936220	T1_H3K27ac_1_17		chr2	28612002	28624484	T3_H3K27ac_17		chr3	185652490	185656604	T4_H3K27ac_17		chr6	32934100	32939784	T5_H3K27ac_17
	chr1	954980	955350	RT4_K27ac_18		chr1	960186	961362	SW_K27ac_18		chr1	961894	962164	SC_K27ac_18		chr1	1014745	1016051	HT1376_K27ac_18		chr1	936391	936739	T1_H3K27ac_1_18		chr17	39843551	39847005	T3_H3K27ac_18		chr7	104650198	104656402	T4_H3K27ac_18		chr9	131899812	131907160	T5_H3K27ac_18
	chr1	955507	956929	RT4_K27ac_19		chr1	1004544	1007406	SW_K27ac_19		chr1	963113	963452	SC_K27ac_19		chr1	1051130	1051562	HT1376_K27ac_19		chr1	936937	937362	T1_H3K27ac_1_19		chr10	32634143	32636905	T3_H3K27ac_19		chr22	50962741	50985795	T4_H3K27ac_19		chr12	31880667	31883433	T5_H3K27ac_19
	chr1	960241	960922	RT4_K27ac_20		chr1	1007558	1010755	SW_K27ac_20		chr1	992940	993125	SC_K27ac_20		chr1	1092906	1094037	HT1376_K27ac_20		chr1	948065	950387	T1_H3K27ac_1_20		chr2	113032548	113034483	T3_H3K27ac_20		chr1	150532535	150543939	T4_H3K27ac_20		chr12	6861235	6863275	T5_H3K27ac_20
	chr1	973178	973836	RT4_K27ac_21		chr1	1014474	1016018	SW_K27ac_21		chr1	993483	995021	SC_K27ac_21		chr1	1152836	1153398	HT1376_K27ac_21		chr1	954945	957315	T1_H3K27ac_1_21		chr8	29937114	29941676	T3_H3K27ac_21		chr8	37593451	37596638	T4_H3K27ac_21		chr1	150532317	150553277	T5_H3K27ac_21
	chr1	988838	989480	RT4_K27ac_22		chr1	1044622	1045180	SW_K27ac_22		chr1	999376	1000176	SC_K27ac_22		chr1	1166671	1167420	HT1376_K27ac_22		chr1	959520	960116	T1_H3K27ac_1_22		chr3	39187443	39196286	T3_H3K27ac_22		chr17	43237457	43240241	T4_H3K27ac_22		chr12	7259785	7262983	T5_H3K27ac_22
	chr1	994625	995328	RT4_K27ac_23		chr1	1045284	1045742	SW_K27ac_23		chr1	1004299	1004676	SC_K27ac_23		chr1	1172687	1174038	HT1376_K27ac_23		chr1	960287	960875	T1_H3K27ac_1_23		chr6	24716863	24722809	T3_H3K27ac_23		chr13	45914286	45916510	T4_H3K27ac_23		chr2	208025855	208033079	T5_H3K27ac_23
	chr1	999411	999775	RT4_K27ac_24		chr1	1050579	1050928	SW_K27ac_24		chr1	1004767	1006125	SC_K27ac_24		chr1	1186025	1187123	HT1376_K27ac_24		chr1	967696	968014	T1_H3K27ac_1_24		chr14	50358459	50364576	T3_H3K27ac_24		chr2	70311868	70317517	T4_H3K27ac_24		chr15	50642737	50648538	T5_H3K27ac_24
	chr1	1008376	1010213	RT4_K27ac_25		chr1	1051095	1051476	SW_K27ac_25		chr1	1008084	1010077	SC_K27ac_25		chr1	1200637	1200876	HT1376_K27ac_25		chr1	1003491	1004351	T1_H3K27ac_1_25		chr2	70310221	70319205	T3_H3K27ac_25		chr2	201725944	201729947	T4_H3K27ac_25		chr12	31153307	31161033	T5_H3K27ac_25
	chr1	1014759	1015640	RT4_K27ac_26		chr1	1093099	1094116	SW_K27ac_26		chr1	1014658	1016067	SC_K27ac_26		chr1	1208204	1209929	HT1376_K27ac_26		chr1	1004854	1006569	T1_H3K27ac_1_26		chr17	1616872	1619607	T3_H3K27ac_26		chr21	38737495	38741286	T4_H3K27ac_26		chr17	80414922	80417672	T5_H3K27ac_26
	chr1	1044946	1045627	RT4_K27ac_27		chr1	1097705	1098017	SW_K27ac_27		chr1	1050718	1050961	SC_K27ac_27		chr1	1242883	1243241	HT1376_K27ac_27		chr1	1006771	1010274	T1_H3K27ac_1_27		chr2	208026464	208033047	T3_H3K27ac_27		chr12	51631785	51633585	T4_H3K27ac_27		chr9	131935284	131940551	T5_H3K27ac_27
	chr1	1051161	1051610	RT4_K27ac_28		chr1	1098388	1098567	SW_K27ac_28		chr1	1051126	1051513	SC_K27ac_28		chr1	1243397	1243806	HT1376_K27ac_28		chr1	1015480	1015903	T1_H3K27ac_1_28		chr8	101318710	101324904	T3_H3K27ac_28		chr3	150263179	150265665	T4_H3K27ac_28		chr6	29690329	29693084	T5_H3K27ac_28
	chr1	1060253	1060913	RT4_K27ac_29		chr1	1098775	1099643	SW_K27ac_29		chr1	1057451	1057948	SC_K27ac_29		chr1	1244009	1244904	HT1376_K27ac_29		chr1	1045446	1046160	T1_H3K27ac_1_29		chr11	102216586	102219407	T3_H3K27ac_29		chr3	170073523	170076613	T4_H3K27ac_29		chr8	29938327	29941842	T5_H3K27ac_29
	chr1	1072144	1072928	RT4_K27ac_30		chr1	1100513	1100893	SW_K27ac_30		chr1	1079616	1080556	SC_K27ac_30		chr1	1253253	1254779	HT1376_K27ac_30		chr1	1051204	1051449	T1_H3K27ac_1_30		chr22	38898548	38903588	T3_H3K27ac_30		chr1	150544168	150553094	T4_H3K27ac_30		chr3	156875900	156879919	T5_H3K27ac_30
	chr1	1079437	1080004	RT4_K27ac_31		chr1	1166605	1167346	SW_K27ac_31		chr1	1092935	1094393	SC_K27ac_31		chr1	1259621	1260887	HT1376_K27ac_31		chr1	1051910	1052204	T1_H3K27ac_1_31		chr6	30456675	30459732	T3_H3K27ac_31		chr6	32935110	32941751	T4_H3K27ac_31		chr10	3827650	3829639	T5_H3K27ac_31
	chr1	1092993	1094119	RT4_K27ac_32		chr1	1173085	1173420	SW_K27ac_32		chr1	1097645	1101783	SC_K27ac_32		chr1	1265932	1267129	HT1376_K27ac_32		chr1	1068360	1068525	T1_H3K27ac_1_32		chr1	245024729	245029488	T3_H3K27ac_32		chr6	136608930	136612635	T4_H3K27ac_32		chr17	44268531	44273210	T5_H3K27ac_32
	chr1	1098197	1100832	RT4_K27ac_33		chr1	1208221	1209179	SW_K27ac_33		chr1	1143636	1144264	SC_K27ac_33		chr1	1279231	1280278	HT1376_K27ac_33		chr1	1068999	1069170	T1_H3K27ac_1_33		chr6	74227508	74234389	T3_H3K27ac_33		chr1	27814824	27817684	T4_H3K27ac_33		chr1	245025483	245029979	T5_H3K27ac_33
	chr1	1107328	1107808	RT4_K27ac_34		chr1	1243523	1243783	SW_K27ac_34		chr1	1152956	1153419	SC_K27ac_34		chr1	1280430	1281330	HT1376_K27ac_34		chr1	1071717	1071901	T1_H3K27ac_1_34		chr14	62161428	62166132	T3_H3K27ac_34		chr1	24284760	24287888	T4_H3K27ac_34		chr11	118659210	118664116	T5_H3K27ac_34
	chr1	1152964	1153692	RT4_K27ac_35		chr1	1244008	1244537	SW_K27ac_35		chr1	1166025	1167441	SC_K27ac_35		chr1	1283755	1284440	HT1376_K27ac_35		chr1	1072204	1072369	T1_H3K27ac_1_35		chr5	90674374	90680751	T3_H3K27ac_35		chr14	50358401	50362903	T4_H3K27ac_35		chr6	64280950	64284647	T5_H3K27ac_35
	chr1	1166511	1167417	RT4_K27ac_36		chr1	1259629	1260050	SW_K27ac_36		chr1	1186424	1186919	SC_K27ac_36		chr1	1285005	1285322	HT1376_K27ac_36		chr1	1072538	1072703	T1_H3K27ac_1_36		chr1	24284841	24288322	T3_H3K27ac_36		chr19	13260300	13267869	T4_H3K27ac_36		chr12	6559485	6562903	T5_H3K27ac_36
	chr1	1167774	1168131	RT4_K27ac_37		chr1	1260286	1260831	SW_K27ac_37		chr1	1199574	1200122	SC_K27ac_37		chr1	1295337	1295810	HT1376_K27ac_37		chr1	1078726	1080468	T1_H3K27ac_1_37		chr2	157194994	157200275	T3_H3K27ac_37		chr17	62500848	62504131	T4_H3K27ac_37		chr11	102215326	102219509	T5_H3K27ac_37
	chr1	1186028	1186711	RT4_K27ac_38		chr1	1266109	1266546	SW_K27ac_38		chr1	1200560	1200997	SC_K27ac_38		chr1	1299290	1299726	HT1376_K27ac_38		chr1	1085178	1085445	T1_H3K27ac_1_38		chr12	51632056	51634590	T3_H3K27ac_38		chr12	69752612	69754629	T4_H3K27ac_38		chr9	132174162	132177642	T5_H3K27ac_38
	chr1	1207939	1209292	RT4_K27ac_39		chr1	1278469	1280289	SW_K27ac_39		chr1	1201183	1201782	SC_K27ac_39		chr1	1299931	1300478	HT1376_K27ac_39		chr1	1092848	1094333	T1_H3K27ac_1_39		chr14	77491474	77512200	T3_H3K27ac_39		chr1	179850335	179853192	T4_H3K27ac_39		chr2	70309880	70318008	T5_H3K27ac_39
	chr1	1243465	1244728	RT4_K27ac_40		chr1	1280413	1282187	SW_K27ac_40		chr1	1207738	1209286	SC_K27ac_40		chr1	1309649	1310666	HT1376_K27ac_40		chr1	1097662	1098008	T1_H3K27ac_1_40		chr6	64281154	64284458	T3_H3K27ac_40		chr15	50643482	50648477	T4_H3K27ac_40		chr4	103745443	103750654	T5_H3K27ac_40
	chr1	1253371	1253577	RT4_K27ac_41		chr1	1283249	1283480	SW_K27ac_41		chr1	1209391	1210268	SC_K27ac_41		chr1	1310873	1311565	HT1376_K27ac_41		chr1	1098237	1099174	T1_H3K27ac_1_41		chr5	133558803	133563295	T3_H3K27ac_41		chr14	23339434	23342518	T4_H3K27ac_41		chr14	69255017	69264284	T5_H3K27ac_41
	chr1	1259679	1260938	RT4_K27ac_42		chr1	1283585	1284502	SW_K27ac_42		chr1	1238385	1239314	SC_K27ac_42		chr1	1334056	1334684	HT1376_K27ac_42		chr1	1099579	1101319	T1_H3K27ac_1_42		chr6	159062605	159067976	T3_H3K27ac_42		chr19	45504088	45505277	T4_H3K27ac_42		chr14	55517520	55520008	T5_H3K27ac_42
	chr1	1268324	1269332	RT4_K27ac_43		chr1	1309845	1310638	SW_K27ac_43		chr1	1239467	1240573	SC_K27ac_43		chr1	1334912	1335901	HT1376_K27ac_43		chr1	1103602	1103873	T1_H3K27ac_1_43		chr20	34327213	34332775	T3_H3K27ac_43		chr19	36235577	36237476	T4_H3K27ac_43		chr19	14627129	14629333	T5_H3K27ac_43
	chr1	1280467	1280799	RT4_K27ac_44		chr1	1310945	1311370	SW_K27ac_44		chr1	1240784	1241898	SC_K27ac_44		chr1	1341910	1343522	HT1376_K27ac_44		chr1	1136271	1136781	T1_H3K27ac_1_44		chr10	70090254	70094916	T3_H3K27ac_44		chr3	150125062	150129127	T4_H3K27ac_44		chr12	122235990	122244846	T5_H3K27ac_44
	chr1	1283050	1284460	RT4_K27ac_45		chr1	1333953	1334667	SW_K27ac_45		chr1	1242652	1242947	SC_K27ac_45		chr1	1356211	1358200	HT1376_K27ac_45		chr1	1136945	1137187	T1_H3K27ac_1_45		chr17	79476008	79485171	T3_H3K27ac_45		chr14	31674862	31678202	T4_H3K27ac_45		chr17	41855093	41856947	T5_H3K27ac_45
	chr1	1284998	1285361	RT4_K27ac_46		chr1	1334916	1335571	SW_K27ac_46		chr1	1243441	1243812	SC_K27ac_46		chr1	1362989	1363319	HT1376_K27ac_46		chr1	1141008	1141275	T1_H3K27ac_1_46		chr8	59465024	59468333	T3_H3K27ac_46		chr5	32582703	32587503	T4_H3K27ac_46		chr6	42748372	42752853	T5_H3K27ac_46
	chr1	1310009	1311390	RT4_K27ac_47		chr1	1342005	1343383	SW_K27ac_47		chr1	1243952	1245209	SC_K27ac_47		chr1	1365762	1366347	HT1376_K27ac_47		chr1	1141549	1141813	T1_H3K27ac_1_47		chr2	178124707	178131644	T3_H3K27ac_47		chr6	29690686	29692407	T4_H3K27ac_47		chr11	122931153	122935693	T5_H3K27ac_47
	chr1	1334080	1334707	RT4_K27ac_48		chr1	1354871	1355468	SW_K27ac_48		chr1	1253850	1254929	SC_K27ac_48		chr1	1366556	1368018	HT1376_K27ac_48		chr1	1143640	1144020	T1_H3K27ac_1_48		chr17	25620267	25623959	T3_H3K27ac_48		chr6	64281522	64284117	T4_H3K27ac_48		chr12	6386194	6390605	T5_H3K27ac_48
	chr1	1334898	1335776	RT4_K27ac_49		chr1	1355915	1356625	SW_K27ac_49		chr1	1259566	1260070	SC_K27ac_49		chr1	1368276	1368612	HT1376_K27ac_49		chr1	1144196	1144395	T1_H3K27ac_1_49		chr14	31674697	31679005	T3_H3K27ac_49		chr3	183352791	183355290	T4_H3K27ac_49		chr14	50357806	50363380	T5_H3K27ac_49
	chr1	1341932	1343491	RT4_K27ac_50		chr1	1356783	1358277	SW_K27ac_50		chr1	1260163	1261066	SC_K27ac_50		chr1	1368811	1369461	HT1376_K27ac_50		chr1	1147227	1149300	T1_H3K27ac_1_50		chr17	40538475	40542499	T3_H3K27ac_50		chr1	226248880	226252250	T4_H3K27ac_50		chr19	15945619	15948762	T5_H3K27ac_50
	chr1	1354997	1355517	RT4_K27ac_51		chr1	1358559	1358824	SW_K27ac_51		chr1	1266495	1266834	SC_K27ac_51		chr1	1387935	1388392	HT1376_K27ac_51		chr1	1150364	1151360	T1_H3K27ac_1_51		chr17	43237242	43239038	T3_H3K27ac_51		chr22	29193907	29198876	T4_H3K27ac_51		chr5	172194399	172206486	T5_H3K27ac_51
	chr1	1355734	1357458	RT4_K27ac_52		chr1	1363063	1363283	SW_K27ac_52		chr1	1278469	1282174	SC_K27ac_52		chr1	1406261	1407795	HT1376_K27ac_52		chr1	1151875	1152210	T1_H3K27ac_1_52		chr11	82868067	82872243	T3_H3K27ac_52		chr1	22378445	22380751	T4_H3K27ac_52		chr2	157195994	157200758	T5_H3K27ac_52
	chr1	1366953	1367705	RT4_K27ac_53		chr1	1366493	1367353	SW_K27ac_53		chr1	1282475	1284484	SC_K27ac_53		chr1	1407979	1408394	HT1376_K27ac_53		chr1	1152738	1153192	T1_H3K27ac_1_53		chr1	29505142	29509562	T3_H3K27ac_53		chr10	3822517	3828586	T4_H3K27ac_53		chr14	102551877	102555256	T5_H3K27ac_53
	chr1	1368119	1369384	RT4_K27ac_54		chr1	1367458	1368250	SW_K27ac_54		chr1	1284961	1285400	SC_K27ac_54		chr1	1440030	1441491	HT1376_K27ac_54		chr1	1166459	1167356	T1_H3K27ac_1_54		chr13	45913627	45916926	T3_H3K27ac_54		chr8	29939466	29941279	T4_H3K27ac_54		chr10	32633142	32636923	T5_H3K27ac_54
	chr1	1406300	1407724	RT4_K27ac_55		chr1	1368844	1369474	SW_K27ac_55		chr1	1294910	1295168	SC_K27ac_55		chr1	1446022	1448104	HT1376_K27ac_55		chr1	1186148	1186441	T1_H3K27ac_1_55		chr15	44083535	44088264	T3_H3K27ac_55		chr17	80414260	80417422	T4_H3K27ac_55		chr13	20435144	20439387	T5_H3K27ac_55
	chr1	1408030	1408390	RT4_K27ac_56		chr1	1371204	1371713	SW_K27ac_56		chr1	1295312	1296119	SC_K27ac_56		chr1	1509375	1510712	HT1376_K27ac_56		chr1	1190838	1191017	T1_H3K27ac_1_56		chr12	69200682	69203426	T3_H3K27ac_56		chr2	70367906	70369850	T4_H3K27ac_56		chr13	31189514	31191805	T5_H3K27ac_56
	chr1	1439745	1441147	RT4_K27ac_57		chr1	1446748	1447421	SW_K27ac_57		chr1	1309476	1311663	SC_K27ac_57		chr1	1550061	1551584	HT1376_K27ac_57		chr1	1206365	1206530	T1_H3K27ac_1_57		chr17	8053591	8059775	T3_H3K27ac_57		chr14	77491349	77495917	T4_H3K27ac_57		chr2	61403364	61405814	T5_H3K27ac_57
	chr1	1446638	1447807	RT4_K27ac_58		chr1	1509469	1510896	SW_K27ac_58		chr1	1333861	1334686	SC_K27ac_58		chr1	1562363	1563451	HT1376_K27ac_58		chr1	1208040	1209685	T1_H3K27ac_1_58		chr5	32585540	32587118	T3_H3K27ac_58		chr2	114643611	114649213	T4_H3K27ac_58		chr2	136741195	136744240	T5_H3K27ac_58
	chr1	1509423	1510710	RT4_K27ac_59		chr1	1550824	1551545	SW_K27ac_59		chr1	1334890	1336021	SC_K27ac_59		chr1	1582166	1582343	HT1376_K27ac_59		chr1	1238250	1238604	T1_H3K27ac_1_59		chr21	38737113	38743703	T3_H3K27ac_59		chr7	99612933	99614190	T4_H3K27ac_59		chr12	6640847	6646193	T5_H3K27ac_59
	chr1	1550714	1551467	RT4_K27ac_60		chr1	1590220	1590710	SW_K27ac_60		chr1	1341844	1343658	SC_K27ac_60		chr1	1590218	1591425	HT1376_K27ac_60		chr1	1238961	1239290	T1_H3K27ac_1_60		chr2	114645911	114650206	T3_H3K27ac_60		chr5	107715811	107718977	T4_H3K27ac_60		chr6	32809675	32813696	T5_H3K27ac_60
	chr1	1590194	1591537	RT4_K27ac_61		chr1	1618108	1618292	SW_K27ac_61		chr1	1356089	1359150	SC_K27ac_61		chr1	1617268	1618827	HT1376_K27ac_61		chr1	1239516	1239709	T1_H3K27ac_1_61		chr15	50642325	50648818	T3_H3K27ac_61		chr7	5568653	5573189	T4_H3K27ac_61		chr2	201979491	201998149	T5_H3K27ac_61
	chr1	1617072	1618649	RT4_K27ac_62		chr1	1623799	1624073	SW_K27ac_62		chr1	1367162	1369727	SC_K27ac_62		chr1	1623719	1624756	HT1376_K27ac_62		chr1	1239926	1240409	T1_H3K27ac_1_62		chr3	185650521	185656552	T3_H3K27ac_62		chr2	136499146	136501127	T4_H3K27ac_62		chr6	17704966	17707822	T5_H3K27ac_62
	chr1	1623714	1624710	RT4_K27ac_63		chr1	1655514	1655962	SW_K27ac_63		chr1	1369950	1370880	SC_K27ac_63		chr1	1648769	1648963	HT1376_K27ac_63		chr1	1240580	1242043	T1_H3K27ac_1_63		chr22	29193424	29198978	T3_H3K27ac_63		chr19	49374957	49379739	T4_H3K27ac_63		chr11	89955060	89957085	T5_H3K27ac_63
	chr1	1655495	1656708	RT4_K27ac_64		chr1	1677511	1677838	SW_K27ac_64		chr1	1371262	1372155	SC_K27ac_64		chr1	1655441	1656701	HT1376_K27ac_64		chr1	1242274	1243811	T1_H3K27ac_1_64		chr17	4045219	4048613	T3_H3K27ac_64		chr10	120838021	120841276	T4_H3K27ac_64		chr17	25619930	25623875	T5_H3K27ac_64
	chr1	1677490	1678044	RT4_K27ac_65		chr1	1689385	1690342	SW_K27ac_65		chr1	1397440	1397834	SC_K27ac_65		chr1	1672061	1673861	HT1376_K27ac_65		chr1	1243977	1245127	T1_H3K27ac_1_65		chr9	91924536	91925834	T3_H3K27ac_65		chr5	98263129	98265979	T4_H3K27ac_65		chr9	96927891	96931780	T5_H3K27ac_65
	chr1	1689324	1691117	RT4_K27ac_66		chr1	1690643	1690878	SW_K27ac_66		chr1	1406168	1407297	SC_K27ac_66		chr1	1677529	1678012	HT1376_K27ac_66		chr1	1245354	1246620	T1_H3K27ac_1_66		chr10	35414789	35417749	T3_H3K27ac_66		chr2	128144409	128146863	T4_H3K27ac_66		chr9	74976154	74981727	T5_H3K27ac_66
	chr1	1709308	1710832	RT4_K27ac_67		chr1	1709315	1709821	SW_K27ac_67		chr1	1407529	1407711	SC_K27ac_67		chr1	1689534	1691505	HT1376_K27ac_67		chr1	1250340	1250624	T1_H3K27ac_1_67		chr1	171453444	171456548	T3_H3K27ac_67		chr6	159063537	159066443	T4_H3K27ac_67		chr3	170073477	170077306	T5_H3K27ac_67
	chr1	1790515	1791082	RT4_K27ac_68		chr1	1709929	1710818	SW_K27ac_68		chr1	1441232	1441533	SC_K27ac_68		chr1	1699987	1700353	HT1376_K27ac_68		chr1	1251759	1251991	T1_H3K27ac_1_68		chr5	179047023	179052311	T3_H3K27ac_68		chr6	42748652	42752248	T4_H3K27ac_68		chr12	27328232	27335798	T5_H3K27ac_68
	chr1	1814952	1815281	RT4_K27ac_69		chr1	1714042	1714497	SW_K27ac_69		chr1	1446576	1447687	SC_K27ac_69		chr1	1709290	1710880	HT1376_K27ac_69		chr1	1253363	1253646	T1_H3K27ac_1_69		chr12	66561574	66564593	T3_H3K27ac_69		chr9	115094825	115095996	T4_H3K27ac_69		chr7	5567432	5572969	T5_H3K27ac_69
	chr1	1821408	1822834	RT4_K27ac_70		chr1	1821589	1822428	SW_K27ac_70		chr1	1509284	1510834	SC_K27ac_70		chr1	1766673	1767109	HT1376_K27ac_70		chr1	1254370	1254633	T1_H3K27ac_1_70		chr17	33306764	33308794	T3_H3K27ac_70		chr6	17705835	17707794	T4_H3K27ac_70		chr12	69200555	69203296	T5_H3K27ac_70
	chr1	1838269	1840541	RT4_K27ac_71		chr1	1838201	1840519	SW_K27ac_71		chr1	1550095	1551227	SC_K27ac_71		chr1	1770903	1772042	HT1376_K27ac_71		chr1	1259602	1260028	T1_H3K27ac_1_71		chr6	143262730	143269701	T3_H3K27ac_71		chr12	69632734	69634831	T4_H3K27ac_71		chr8	101960667	101966784	T5_H3K27ac_71
	chr1	1850371	1850684	RT4_K27ac_72		chr1	1981194	1981597	SW_K27ac_72		chr1	1561845	1562031	SC_K27ac_72		chr1	1789830	1791685	HT1376_K27ac_72		chr1	1260184	1261137	T1_H3K27ac_1_72		chr3	150124625	150130746	T3_H3K27ac_72		chr5	56468239	56472792	T4_H3K27ac_72		chr12	27396394	27400196	T5_H3K27ac_72
	chr1	1900904	1901434	RT4_K27ac_73		chr1	1981926	1982382	SW_K27ac_73		chr1	1562195	1563667	SC_K27ac_73		chr1	1814995	1815996	HT1376_K27ac_73		chr1	1266217	1266541	T1_H3K27ac_1_73		chr4	77994466	77998716	T3_H3K27ac_73		chr3	146258596	146263486	T4_H3K27ac_73		chr9	86593210	86596746	T5_H3K27ac_73
	chr1	1981124	1982518	RT4_K27ac_74		chr1	2064310	2064493	SW_K27ac_74		chr1	1590215	1591134	SC_K27ac_74		chr1	1821401	1823464	HT1376_K27ac_74		chr1	1279716	1280138	T1_H3K27ac_1_74		chr18	3446219	3456661	T3_H3K27ac_74		chr3	169489409	169491895	T4_H3K27ac_74		chr14	62161087	62166676	T5_H3K27ac_74
	chr1	2125930	2127132	RT4_K27ac_75		chr1	2067388	2067636	SW_K27ac_75		chr1	1617086	1617740	SC_K27ac_75		chr1	1837969	1840550	HT1376_K27ac_75		chr1	1280939	1281145	T1_H3K27ac_1_75		chr2	136498995	136501104	T3_H3K27ac_75		chr11	65243710	65247164	T4_H3K27ac_75		chr2	70367383	70369767	T5_H3K27ac_75
	chr1	2138878	2140543	RT4_K27ac_76		chr1	2158768	2159088	SW_K27ac_76		chr1	1617937	1618929	SC_K27ac_76		chr1	1840821	1841071	HT1376_K27ac_76		chr1	1281396	1281561	T1_H3K27ac_1_76		chr1	155176638	155179573	T3_H3K27ac_76		chr1	161368276	161370682	T4_H3K27ac_76		chr19	49374908	49380167	T5_H3K27ac_76
	chr1	2158336	2159121	RT4_K27ac_77		chr1	2160415	2161097	SW_K27ac_77		chr1	1623800	1624758	SC_K27ac_77		chr1	1850209	1851352	HT1376_K27ac_77		chr1	1282417	1284453	T1_H3K27ac_1_77		chr5	138628835	138631088	T3_H3K27ac_77		chr13	50697531	50702016	T4_H3K27ac_77		chr20	34328225	34330262	T5_H3K27ac_77
	chr1	2160950	2161684	RT4_K27ac_78		chr1	2246144	2246525	SW_K27ac_78		chr1	1655488	1656409	SC_K27ac_78		chr1	1981140	1981608	HT1376_K27ac_78		chr1	1284980	1285341	T1_H3K27ac_1_78		chr4	186315601	186318578	T3_H3K27ac_78		chr22	41839929	41845228	T4_H3K27ac_78		chr2	28972929	28976904	T5_H3K27ac_78
	chr1	2186762	2187645	RT4_K27ac_79		chr1	2322528	2322977	SW_K27ac_79		chr1	1672035	1672527	SC_K27ac_79		chr1	2065115	2065478	HT1376_K27ac_79		chr1	1287083	1287288	T1_H3K27ac_1_79		chr11	118659186	118664478	T3_H3K27ac_79		chr1	185283569	185288184	T4_H3K27ac_79		chr6	159062918	159066906	T5_H3K27ac_79
	chr1	2189562	2189905	RT4_K27ac_80		chr1	2323431	2323871	SW_K27ac_80		chr1	1672651	1672962	SC_K27ac_80		chr1	2066345	2068020	HT1376_K27ac_80		chr1	1292010	1294643	T1_H3K27ac_1_80		chr6	137536785	137543674	T3_H3K27ac_80		chr20	44562231	44564745	T4_H3K27ac_80		chr9	115093026	115097264	T5_H3K27ac_80
	chr1	2207800	2208038	RT4_K27ac_81		chr1	2343307	2343940	SW_K27ac_81		chr1	1677579	1677828	SC_K27ac_81		chr1	2120737	2120991	HT1376_K27ac_81		chr1	1294824	1295840	T1_H3K27ac_1_81		chr19	13946192	13964137	T3_H3K27ac_81		chr2	157197403	157200087	T4_H3K27ac_81		chr8	126440888	126449109	T5_H3K27ac_81
	chr1	2246231	2246828	RT4_K27ac_82		chr1	2344344	2345025	SW_K27ac_82		chr1	1688870	1690523	SC_K27ac_82		chr1	2121213	2121647	HT1376_K27ac_82		chr1	1296417	1296729	T1_H3K27ac_1_82		chr5	98262308	98266631	T3_H3K27ac_82		chr5	138628394	138631001	T4_H3K27ac_82		chr17	62500566	62504181	T5_H3K27ac_82
	chr1	2266436	2266894	RT4_K27ac_83		chr1	2360173	2360550	SW_K27ac_83		chr1	1690578	1690907	SC_K27ac_83		chr1	2125949	2127050	HT1376_K27ac_83		chr1	1297137	1297350	T1_H3K27ac_1_83		chr17	48941534	48946733	T3_H3K27ac_83		chr12	69863674	69865128	T4_H3K27ac_83		chr5	132386467	132389045	T5_H3K27ac_83
	chr1	2267208	2268183	RT4_K27ac_84		chr1	2382987	2383174	SW_K27ac_84		chr1	1709053	1709827	SC_K27ac_84		chr1	2136761	2137306	HT1376_K27ac_84		chr1	1309942	1311747	T1_H3K27ac_1_84		chr20	42085730	42088108	T3_H3K27ac_84		chr3	142164271	142167231	T4_H3K27ac_84		chr19	34662151	34665198	T5_H3K27ac_84
	chr1	2322499	2323021	RT4_K27ac_85		chr1	2383550	2383975	SW_K27ac_85		chr1	1709921	1711070	SC_K27ac_85		chr1	2143622	2144950	HT1376_K27ac_85		chr1	1333348	1333574	T1_H3K27ac_1_85		chr10	43900952	43905965	T3_H3K27ac_85		chr19	41767232	41772086	T4_H3K27ac_85		chr9	33813128	33819578	T5_H3K27ac_85
	chr1	2323253	2323958	RT4_K27ac_86		chr1	2457135	2457640	SW_K27ac_86		chr1	1711707	1712076	SC_K27ac_86		chr1	2158446	2159153	HT1376_K27ac_86		chr1	1333736	1334750	T1_H3K27ac_1_86		chr2	9694740	9697257	T3_H3K27ac_86		chr3	151983944	151989500	T4_H3K27ac_86		chr19	42719414	42722964	T5_H3K27ac_86
	chr1	2343440	2344014	RT4_K27ac_87		chr1	2477956	2478281	SW_K27ac_87		chr1	1714074	1714556	SC_K27ac_87		chr1	2186838	2188150	HT1376_K27ac_87		chr1	1334904	1335904	T1_H3K27ac_1_87		chr6	42748180	42753211	T3_H3K27ac_87		chr1	228674162	228675796	T4_H3K27ac_87		chr19	41770106	41773232	T5_H3K27ac_87
	chr1	2344217	2344990	RT4_K27ac_88		chr1	2479695	2480014	SW_K27ac_88		chr1	1714866	1715034	SC_K27ac_88		chr1	2245967	2246670	HT1376_K27ac_88		chr1	1342061	1343584	T1_H3K27ac_1_88		chr7	44835235	44838562	T3_H3K27ac_88		chr19	18389602	18392375	T4_H3K27ac_88		chr12	31742322	31744979	T5_H3K27ac_88
	chr1	2347922	2348552	RT4_K27ac_89		chr1	2480359	2480915	SW_K27ac_89		chr1	1716324	1716687	SC_K27ac_89		chr1	2253411	2253936	HT1376_K27ac_89		chr1	1344790	1345184	T1_H3K27ac_1_89		chr5	132297611	132300245	T3_H3K27ac_89		chr16	30709193	30711259	T4_H3K27ac_89		chr10	43901160	43906261	T5_H3K27ac_89
	chr1	2359653	2360814	RT4_K27ac_90		chr1	2487590	2488103	SW_K27ac_90		chr1	1765502	1765707	SC_K27ac_90		chr1	2322283	2323048	HT1376_K27ac_90		chr1	1346634	1347224	T1_H3K27ac_1_90		chr11	33277497	33282010	T3_H3K27ac_90		chr8	38125292	38127416	T4_H3K27ac_90		chr2	152144499	152147637	T5_H3K27ac_90
	chr1	2362374	2362715	RT4_K27ac_91		chr1	2509351	2509799	SW_K27ac_91		chr1	1767380	1767687	SC_K27ac_91		chr1	2323221	2323936	HT1376_K27ac_91		chr1	1353900	1354709	T1_H3K27ac_1_91		chr3	49056930	49060451	T3_H3K27ac_91		chr6	41039063	41042216	T4_H3K27ac_91		chr11	33277626	33281889	T5_H3K27ac_91
	chr1	2362889	2363364	RT4_K27ac_92		chr1	2517088	2517325	SW_K27ac_92		chr1	1790006	1790256	SC_K27ac_92		chr1	2335480	2335926	HT1376_K27ac_92		chr1	1355053	1355495	T1_H3K27ac_1_92		chr8	38237175	38244882	T3_H3K27ac_92		chr2	113032027	113034399	T4_H3K27ac_92		chr13	45913975	45916884	T5_H3K27ac_92
	chr1	2457043	2458278	RT4_K27ac_93		chr1	2517458	2517786	SW_K27ac_93		chr1	1790868	1791407	SC_K27ac_93		chr1	2336284	2336537	HT1376_K27ac_93		chr1	1355770	1357659	T1_H3K27ac_1_93		chr22	18120107	18122927	T3_H3K27ac_93		chr1	19810129	19813594	T4_H3K27ac_93		chr9	3524413	3529546	T5_H3K27ac_93
	chr1	2465791	2466096	RT4_K27ac_94		chr1	2574152	2574629	SW_K27ac_94		chr1	1814419	1814681	SC_K27ac_94		chr1	2343223	2344069	HT1376_K27ac_94		chr1	1357917	1358179	T1_H3K27ac_1_94		chr2	196521137	196525112	T3_H3K27ac_94		chr3	101566991	101570995	T4_H3K27ac_94		chr2	61107440	61110977	T5_H3K27ac_94
	chr1	2466437	2466632	RT4_K27ac_95		chr1	3371291	3371540	SW_K27ac_95		chr1	1819663	1819951	SC_K27ac_95		chr1	2344237	2345035	HT1376_K27ac_95		chr1	1358351	1358672	T1_H3K27ac_1_95		chr3	5017388	5031698	T3_H3K27ac_95		chr10	32634963	32636825	T4_H3K27ac_95		chr2	43444970	43456845	T5_H3K27ac_95
	chr1	2477851	2478376	RT4_K27ac_96		chr1	3459020	3460033	SW_K27ac_96		chr1	1820837	1821067	SC_K27ac_96		chr1	2457096	2457704	HT1376_K27ac_96		chr1	1362972	1363272	T1_H3K27ac_1_96		chr3	171756969	171760629	T3_H3K27ac_96		chr1	245025106	245028764	T4_H3K27ac_96		chr11	92929677	92931825	T5_H3K27ac_96
	chr1	2478586	2479217	RT4_K27ac_97		chr1	3566057	3566538	SW_K27ac_97		chr1	1821198	1821866	SC_K27ac_97		chr1	2457858	2458061	HT1376_K27ac_97		chr1	1363801	1363966	T1_H3K27ac_1_97		chr15	72764707	72768887	T3_H3K27ac_97		chr1	249131662	249133875	T4_H3K27ac_97		chr6	30456690	30460065	T5_H3K27ac_97
	chr1	2479669	2481033	RT4_K27ac_98		chr1	3816278	3816757	SW_K27ac_98		chr1	1821929	1822472	SC_K27ac_98		chr1	2461808	2462306	HT1376_K27ac_98		chr1	1365215	1370991	T1_H3K27ac_1_98		chr3	101566500	101571392	T3_H3K27ac_98		chr14	35871489	35875006	T4_H3K27ac_98		chr8	90993346	90997327	T5_H3K27ac_98
	chr1	2487157	2488630	RT4_K27ac_99		chr1	3816923	3817455	SW_K27ac_99		chr1	1822596	1823482	SC_K27ac_99		chr1	2464371	2464908	HT1376_K27ac_99		chr1	1371417	1371647	T1_H3K27ac_1_99		chr17	44268624	44273497	T3_H3K27ac_99		chr2	227700078	227702854	T4_H3K27ac_99		chr17	41444734	41447682	T5_H3K27ac_99
	chr1	2507528	2508149	RT4_K27ac_100		chr1	6052037	6052436	SW_K27ac_100		chr1	1828686	1828981	SC_K27ac_100		chr1	2465125	2466315	HT1376_K27ac_100		chr1	1397021	1398618	T1_H3K27ac_1_100		chr16	9185378	9187657	T3_H3K27ac_100		chr6	134493576	134500038	T4_H3K27ac_100		chr15	93344240	93355939	T5_H3K27ac_100
	chr1	2509215	2510698	RT4_K27ac_101		chr1	6118824	6119108	SW_K27ac_101		chr1	1837576	1840606	SC_K27ac_101		chr1	2466594	2467171	HT1376_K27ac_101		chr1	1400007	1400232	T1_H3K27ac_1_101		chr19	18629407	18633080	T3_H3K27ac_101		chr8	126441051	126448626	T4_H3K27ac_101		chr2	113032583	113034256	T5_H3K27ac_101
	chr1	2517011	2517992	RT4_K27ac_102		chr1	6133521	6134297	SW_K27ac_102		chr1	1840728	1841257	SC_K27ac_102		chr1	2477809	2479120	HT1376_K27ac_102		chr1	1406317	1406994	T1_H3K27ac_1_102		chr12	12866103	12874898	T3_H3K27ac_102		chr3	119812206	119815473	T4_H3K27ac_102		chr2	128144275	128147084	T5_H3K27ac_102
	chr1	2518419	2518833	RT4_K27ac_103		chr1	6134981	6135463	SW_K27ac_103		chr1	1850328	1850729	SC_K27ac_103		chr1	2487598	2488517	HT1376_K27ac_103		chr1	1407187	1407742	T1_H3K27ac_1_103		chr1	203272552	203279171	T3_H3K27ac_103		chr9	3524955	3528296	T4_H3K27ac_103		chr17	43237215	43239066	T5_H3K27ac_103
	chr1	2524085	2524623	RT4_K27ac_104		chr1	6218258	6218592	SW_K27ac_104		chr1	1851197	1851406	SC_K27ac_104		chr1	2509389	2510385	HT1376_K27ac_104		chr1	1407940	1408234	T1_H3K27ac_1_104		chr1	35656429	35659207	T3_H3K27ac_104		chr3	149529738	149532408	T4_H3K27ac_104		chr17	20944157	20946490	T5_H3K27ac_104
	chr1	2573942	2574751	RT4_K27ac_105		chr1	6258829	6259705	SW_K27ac_105		chr1	1900210	1900674	SC_K27ac_105		chr1	2517017	2518072	HT1376_K27ac_105		chr1	1440615	1441039	T1_H3K27ac_1_105		chr14	91974740	91977821	T3_H3K27ac_105		chr11	65183796	65196370	T4_H3K27ac_105		chr5	56467961	56472998	T5_H3K27ac_105
	chr1	3087168	3088392	RT4_K27ac_106		chr1	6265504	6267024	SW_K27ac_106		chr1	1900886	1901416	SC_K27ac_106		chr1	3370593	3371959	HT1376_K27ac_106		chr1	1446779	1447804	T1_H3K27ac_1_106		chr9	3524312	3528928	T3_H3K27ac_106		chr20	34251297	34253414	T4_H3K27ac_106		chr17	40538961	40540583	T5_H3K27ac_106
	chr1	3236280	3236609	RT4_K27ac_107		chr1	6279953	6280388	SW_K27ac_107		chr1	1933127	1933578	SC_K27ac_107		chr1	3376350	3377946	HT1376_K27ac_107		chr1	1475849	1476491	T1_H3K27ac_1_107		chr7	26237866	26242503	T3_H3K27ac_107		chr17	25620424	25622865	T4_H3K27ac_107		chr5	133560313	133563350	T5_H3K27ac_107
	chr1	3286087	3286751	RT4_K27ac_108		chr1	6280617	6281101	SW_K27ac_108		chr1	1980873	1981634	SC_K27ac_108		chr1	3387531	3388479	HT1376_K27ac_108		chr1	1477694	1477992	T1_H3K27ac_1_108		chr11	47786729	47790223	T3_H3K27ac_108		chr4	15002740	15007589	T4_H3K27ac_108		chr1	179849933	179853491	T5_H3K27ac_108
	chr1	3296776	3297225	RT4_K27ac_109		chr1	6360519	6361634	SW_K27ac_109		chr1	1981870	1982913	SC_K27ac_109		chr1	3398350	3398833	HT1376_K27ac_109		chr1	1489934	1490145	T1_H3K27ac_1_109		chr12	56550247	56556100	T3_H3K27ac_109		chr7	44923862	44926558	T4_H3K27ac_109		chr3	119811871	119815696	T5_H3K27ac_109
	chr1	3370393	3371829	RT4_K27ac_110		chr1	6361881	6362568	SW_K27ac_110		chr1	1984904	1985454	SC_K27ac_110		chr1	3398989	3399707	HT1376_K27ac_110		chr1	1509442	1510882	T1_H3K27ac_1_110		chr1	156465536	156480668	T3_H3K27ac_110		chr19	10763313	10764684	T4_H3K27ac_110		chr4	89299563	89300774	T5_H3K27ac_110
	chr1	3376447	3377110	RT4_K27ac_111		chr1	6417422	6419955	SW_K27ac_111		chr1	2063504	2064741	SC_K27ac_111		chr1	3420375	3421571	HT1376_K27ac_111		chr1	1543113	1543387	T1_H3K27ac_1_111		chr4	83292320	83296465	T3_H3K27ac_111		chr12	69200621	69203375	T4_H3K27ac_111		chr12	31898768	31904401	T5_H3K27ac_111
	chr1	3447056	3447979	RT4_K27ac_112		chr1	6420160	6420878	SW_K27ac_112		chr1	2064849	2065910	SC_K27ac_112		chr1	3426442	3426875	HT1376_K27ac_112		chr1	1549498	1549831	T1_H3K27ac_1_112		chr3	12704073	12706751	T3_H3K27ac_112		chr12	12866578	12873346	T4_H3K27ac_112		chr8	101318734	101323743	T5_H3K27ac_112
	chr1	3469821	3470502	RT4_K27ac_113		chr1	6452684	6453417	SW_K27ac_113		chr1	2065986	2068052	SC_K27ac_113		chr1	3446650	3447983	HT1376_K27ac_113		chr1	1550129	1551966	T1_H3K27ac_1_113		chr19	49375033	49380105	T3_H3K27ac_113		chr2	208028305	208032239	T4_H3K27ac_113		chr12	6492306	6494690	T5_H3K27ac_113
	chr1	3503436	3504365	RT4_K27ac_114		chr1	6453592	6454280	SW_K27ac_114		chr1	2070892	2071515	SC_K27ac_114		chr1	3459126	3460631	HT1376_K27ac_114		chr1	1564346	1564618	T1_H3K27ac_1_114		chr3	128899147	128904623	T3_H3K27ac_114		chr11	102217053	102219223	T4_H3K27ac_114		chr2	178075914	178078793	T5_H3K27ac_114
	chr1	3541568	3542338	RT4_K27ac_115		chr1	6473579	6473848	SW_K27ac_115		chr1	2071704	2072409	SC_K27ac_115		chr1	3463596	3463932	HT1376_K27ac_115		chr1	1564811	1565031	T1_H3K27ac_1_115		chr11	65241877	65277658	T3_H3K27ac_115		chr11	33277724	33281019	T4_H3K27ac_115		chr5	90674404	90680596	T5_H3K27ac_115
	chr1	3566114	3566619	RT4_K27ac_116		chr1	6474132	6475378	SW_K27ac_116		chr1	2120573	2120982	SC_K27ac_116		chr1	3464189	3465366	HT1376_K27ac_116		chr1	1565907	1566887	T1_H3K27ac_1_116		chr2	174826771	174831455	T3_H3K27ac_116		chr1	171453919	171456151	T4_H3K27ac_116		chr1	234734186	234750301	T5_H3K27ac_116
	chr1	3568781	3569550	RT4_K27ac_117		chr1	6531142	6531583	SW_K27ac_117		chr1	2121229	2122025	SC_K27ac_117		chr1	3470272	3471123	HT1376_K27ac_117		chr1	1590220	1591465	T1_H3K27ac_1_117		chr19	45504215	45505275	T3_H3K27ac_117		chr12	57079236	57083647	T4_H3K27ac_117		chr12	12713529	12717044	T5_H3K27ac_117
	chr1	3597527	3598004	RT4_K27ac_118		chr1	6531811	6532207	SW_K27ac_118		chr1	2125514	2126154	SC_K27ac_118		chr1	3540391	3541319	HT1376_K27ac_118		chr1	1592711	1592876	T1_H3K27ac_1_118		chr1	27111775	27116048	T3_H3K27ac_118		chr5	172196316	172201361	T4_H3K27ac_118		chr1	171453417	171456282	T5_H3K27ac_118
	chr1	3615011	3615637	RT4_K27ac_119		chr1	6532388	6532640	SW_K27ac_119		chr1	2126274	2127076	SC_K27ac_119		chr1	3541547	3542261	HT1376_K27ac_119		chr1	1609054	1610233	T1_H3K27ac_1_119		chr18	3245661	3251042	T3_H3K27ac_119		chrX	131350590	131353080	T4_H3K27ac_119		chr11	77530153	77533082	T5_H3K27ac_119
	chr1	3615884	3616254	RT4_K27ac_120		chr1	6550261	6551638	SW_K27ac_120		chr1	2130117	2130793	SC_K27ac_120		chr1	3566059	3566562	HT1376_K27ac_120		chr1	1610411	1610576	T1_H3K27ac_1_120		chr5	172190428	172206657	T3_H3K27ac_120		chr5	179049965	179051631	T4_H3K27ac_120		chr1	78441863	78446223	T5_H3K27ac_120
	chr1	3619019	3621298	RT4_K27ac_121		chr1	6613940	6614587	SW_K27ac_121		chr1	2130974	2131398	SC_K27ac_121		chr1	3568567	3569740	HT1376_K27ac_121		chr1	1610999	1611164	T1_H3K27ac_1_121		chr19	13260219	13268018	T3_H3K27ac_121		chr16	67595083	67598753	T4_H3K27ac_121		chr9	91924514	91925864	T5_H3K27ac_121
	chr1	3625348	3625733	RT4_K27ac_122		chr1	6640064	6640641	SW_K27ac_122		chr1	2136765	2137103	SC_K27ac_122		chr1	3585167	3586241	HT1376_K27ac_122		chr1	1612571	1612753	T1_H3K27ac_1_122		chr13	52025005	52027262	T3_H3K27ac_122		chr20	42085873	42087503	T4_H3K27ac_122		chr14	23338783	23342535	T5_H3K27ac_122
	chr1	3633602	3634447	RT4_K27ac_123		chr1	6660734	6661246	SW_K27ac_123		chr1	2139405	2139853	SC_K27ac_123		chr1	3588212	3588532	HT1376_K27ac_123		chr1	1617425	1617674	T1_H3K27ac_1_123		chr2	85763077	85769311	T3_H3K27ac_123		chr15	72765300	72768343	T4_H3K27ac_123		chr12	125398122	125406908	T5_H3K27ac_123
	chr1	3688763	3689007	RT4_K27ac_124		chr1	6661495	6662144	SW_K27ac_124		chr1	2143656	2145511	SC_K27ac_124		chr1	3590948	3591535	HT1376_K27ac_124		chr1	1617956	1618784	T1_H3K27ac_1_124		chr16	2826176	2828850	T3_H3K27ac_124		chr6	155054065	155056127	T4_H3K27ac_124		chr5	65220521	65224345	T5_H3K27ac_124
	chr1	3689308	3689685	RT4_K27ac_125		chr1	6662347	6662614	SW_K27ac_125		chr1	2158261	2159138	SC_K27ac_125		chr1	3597439	3597749	HT1376_K27ac_125		chr1	1623708	1624607	T1_H3K27ac_1_125		chr10	27442479	27445947	T3_H3K27ac_125		chr14	64969204	64972704	T4_H3K27ac_125		chr1	152004935	152010752	T5_H3K27ac_125
	chr1	3712040	3713444	RT4_K27ac_126		chr1	6672838	6673520	SW_K27ac_126		chr1	2160154	2162018	SC_K27ac_126		chr1	3607064	3607265	HT1376_K27ac_126		chr1	1655474	1656705	T1_H3K27ac_1_126		chr5	180687031	180689524	T3_H3K27ac_126		chr17	74730897	74734818	T4_H3K27ac_126		chr14	24663961	24666014	T5_H3K27ac_126
	chr1	3773421	3773806	RT4_K27ac_127		chr1	6673885	6674961	SW_K27ac_127		chr1	2162084	2163046	SC_K27ac_127		chr1	3619499	3620729	HT1376_K27ac_127		chr1	1658669	1658935	T1_H3K27ac_1_127		chr14	70232949	70235781	T3_H3K27ac_127		chr2	152144666	152147242	T4_H3K27ac_127		chr14	53160862	53164317	T5_H3K27ac_127
	chr1	3774043	3774688	RT4_K27ac_128		chr1	6685005	6685803	SW_K27ac_128		chr1	2165292	2166478	SC_K27ac_128		chr1	3633361	3633966	HT1376_K27ac_128		chr1	1660448	1661067	T1_H3K27ac_1_128		chr2	219260108	219266813	T3_H3K27ac_128		chr5	56109355	56113556	T4_H3K27ac_128		chr1	59247010	59252520	T5_H3K27ac_128
	chr1	3816287	3817828	RT4_K27ac_129		chr1	6760963	6761854	SW_K27ac_129		chr1	2169681	2169961	SC_K27ac_129		chr1	3663573	3664123	HT1376_K27ac_129		chr1	1669295	1669646	T1_H3K27ac_1_129		chr12	6442303	6457704	T3_H3K27ac_129		chr14	62162044	62164569	T4_H3K27ac_129		chr18	11907943	11910247	T5_H3K27ac_129
	chr1	4016287	4017016	RT4_K27ac_130		chr1	6844233	6844615	SW_K27ac_130		chr1	2177880	2178247	SC_K27ac_130		chr1	3712268	3713627	HT1376_K27ac_130		chr1	1671625	1671822	T1_H3K27ac_1_130		chr1	249131573	249134038	T3_H3K27ac_130		chr2	61107863	61110875	T4_H3K27ac_130		chr12	6975445	6978649	T5_H3K27ac_130
	chr1	6052015	6052514	RT4_K27ac_131		chr1	6844785	6845075	SW_K27ac_131		chr1	2186591	2187304	SC_K27ac_131		chr1	3773246	3773787	HT1376_K27ac_131		chr1	1672203	1672721	T1_H3K27ac_1_131		chr22	32869568	32872925	T3_H3K27ac_131		chr9	33024260	33026346	T4_H3K27ac_131		chr22	36042925	36046248	T5_H3K27ac_131
	chr1	6243985	6244837	RT4_K27ac_132		chr1	7609170	7609369	SW_K27ac_132		chr1	2187443	2187771	SC_K27ac_132		chr1	3785683	3786902	HT1376_K27ac_132		chr1	1677041	1678085	T1_H3K27ac_1_132		chr8	104426522	104428096	T3_H3K27ac_132		chr2	201979557	201993065	T4_H3K27ac_132		chr8	90767978	90774375	T5_H3K27ac_132
	chr1	6258852	6260377	RT4_K27ac_133		chr1	7609691	7610296	SW_K27ac_133		chr1	2221643	2222257	SC_K27ac_133		chr1	3816268	3817867	HT1376_K27ac_133		chr1	1678555	1678734	T1_H3K27ac_1_133		chr17	80414579	80417290	T3_H3K27ac_133		chr7	44835675	44838035	T4_H3K27ac_133		chr9	139775661	139782312	T5_H3K27ac_133
	chr1	6265503	6266794	RT4_K27ac_134		chr1	7610431	7610758	SW_K27ac_134		chr1	2222388	2223102	SC_K27ac_134		chr1	4709954	4710564	HT1376_K27ac_134		chr1	1681457	1681755	T1_H3K27ac_1_134		chr1	17229692	17232380	T3_H3K27ac_134		chr1	17229709	17231803	T4_H3K27ac_134		chr18	3446162	3456430	T5_H3K27ac_134
	chr1	6279582	6281649	RT4_K27ac_135		chr1	7830943	7831992	SW_K27ac_135		chr1	2230524	2231040	SC_K27ac_135		chr1	4710806	4711389	HT1376_K27ac_135		chr1	1689453	1690353	T1_H3K27ac_1_135		chr18	11907431	11910167	T3_H3K27ac_135		chr17	44268609	44272739	T4_H3K27ac_135		chr14	70232982	70235204	T5_H3K27ac_135
	chr1	6295357	6296512	RT4_K27ac_136		chr1	7843500	7843755	SW_K27ac_136		chr1	2235172	2236050	SC_K27ac_136		chr1	6038035	6039013	HT1376_K27ac_136		chr1	1690573	1691485	T1_H3K27ac_1_136		chr2	232570304	232573035	T3_H3K27ac_136		chr20	34637897	34639365	T4_H3K27ac_136		chr20	3868661	3872218	T5_H3K27ac_136
	chr1	6385811	6386436	RT4_K27ac_137		chr1	7844369	7844674	SW_K27ac_137		chr1	2237446	2237803	SC_K27ac_137		chr1	6051647	6052613	HT1376_K27ac_137		chr1	1706214	1706379	T1_H3K27ac_1_137		chr1	150530843	150543706	T3_H3K27ac_137		chr14	55517652	55519747	T4_H3K27ac_137		chr19	39891381	39904999	T5_H3K27ac_137
	chr1	6403157	6403641	RT4_K27ac_138		chr1	8021215	8021481	SW_K27ac_138		chr1	2237905	2238466	SC_K27ac_138		chr1	6085464	6086872	HT1376_K27ac_138		chr1	1706861	1707757	T1_H3K27ac_1_138		chr6	17704794	17707800	T3_H3K27ac_138		chr15	79165170	79166548	T4_H3K27ac_138		chr8	38237017	38244832	T5_H3K27ac_138
	chr1	6403877	6404569	RT4_K27ac_139		chr1	8021757	8022235	SW_K27ac_139		chr1	2245360	2246689	SC_K27ac_139		chr1	6118624	6119887	HT1376_K27ac_139		chr1	1708005	1708321	T1_H3K27ac_1_139		chr11	3816809	3818898	T3_H3K27ac_139		chr8	64080182	64082269	T4_H3K27ac_139		chr3	107807179	107810783	T5_H3K27ac_139
	chr1	6410190	6410939	RT4_K27ac_140		chr1	8064879	8065392	SW_K27ac_140		chr1	2246806	2247197	SC_K27ac_140		chr1	6133269	6135538	HT1376_K27ac_140		chr1	1709184	1713323	T1_H3K27ac_1_140		chr9	74975960	74981759	T3_H3K27ac_140		chr5	133560664	133563010	T4_H3K27ac_140		chr11	82868113	82872233	T5_H3K27ac_140
	chr1	6418317	6419904	RT4_K27ac_141		chr1	8081788	8084724	SW_K27ac_141		chr1	2247570	2248412	SC_K27ac_141		chr1	6216676	6217875	HT1376_K27ac_141		chr1	1713490	1715137	T1_H3K27ac_1_141		chr13	31189574	31193804	T3_H3K27ac_141		chr11	118659250	118663605	T4_H3K27ac_141		chr19	36235193	36237527	T5_H3K27ac_141
	chr1	6420159	6420929	RT4_K27ac_142		chr1	8084995	8086353	SW_K27ac_142		chr1	2252994	2253730	SC_K27ac_142		chr1	6218095	6218716	HT1376_K27ac_142		chr1	1739031	1739264	T1_H3K27ac_1_142		chr2	128144418	128147043	T3_H3K27ac_142		chr14	69255107	69264108	T4_H3K27ac_142		chr6	160146942	160150315	T5_H3K27ac_142
	chr1	6433171	6433922	RT4_K27ac_143		chr1	8086505	8087885	SW_K27ac_143		chr1	2253805	2254595	SC_K27ac_143		chr1	6258801	6259708	HT1376_K27ac_143		chr1	1741096	1741414	T1_H3K27ac_1_143		chr3	170073312	170076941	T3_H3K27ac_143		chr19	15946756	15948549	T4_H3K27ac_143		chr13	77599356	77602459	T5_H3K27ac_143
	chr1	6434249	6434754	RT4_K27ac_144		chr1	8088036	8088569	SW_K27ac_144		chr1	2322355	2323048	SC_K27ac_144		chr1	6259890	6260330	HT1376_K27ac_144		chr1	1742103	1742268	T1_H3K27ac_1_144		chr1	113159919	113165255	T3_H3K27ac_144		chr6	33279992	33283656	T4_H3K27ac_144		chr3	39187464	39195925	T5_H3K27ac_144
	chr1	6452971	6454299	RT4_K27ac_145		chr1	8103782	8104330	SW_K27ac_145		chr1	2323179	2324160	SC_K27ac_145		chr1	6265559	6266713	HT1376_K27ac_145		chr1	1747014	1747189	T1_H3K27ac_1_145		chr9	35069617	35072859	T3_H3K27ac_145		chr11	67350293	67352255	T4_H3K27ac_145		chr22	50963378	50988607	T5_H3K27ac_145
	chr1	6474111	6475992	RT4_K27ac_146		chr1	8104675	8105532	SW_K27ac_146		chr1	2343275	2344066	SC_K27ac_146		chr1	6273750	6274091	HT1376_K27ac_146		chr1	1773378	1774163	T1_H3K27ac_1_146		chr2	178075336	178078861	T3_H3K27ac_146		chr9	98636544	98639612	T4_H3K27ac_146		chr19	13945949	13966441	T5_H3K27ac_146
	chr1	6479659	6479984	RT4_K27ac_147		chr1	8105704	8106148	SW_K27ac_147		chr1	2344241	2345065	SC_K27ac_147		chr1	6279583	6281220	HT1376_K27ac_147		chr1	1785345	1785756	T1_H3K27ac_1_147		chr12	76476726	76479619	T3_H3K27ac_147		chr6	160147246	160149687	T4_H3K27ac_147		chr14	103799054	103801966	T5_H3K27ac_147
	chr1	6490674	6491606	RT4_K27ac_148		chr1	8106273	8107012	SW_K27ac_148		chr1	2347355	2348499	SC_K27ac_148		chr1	6294593	6296623	HT1376_K27ac_148		chr1	1789368	1791025	T1_H3K27ac_1_148		chr2	201674709	201678153	T3_H3K27ac_148		chr6	32819385	32823445	T4_H3K27ac_148		chr12	6999396	7001218	T5_H3K27ac_148
	chr1	6531275	6532701	RT4_K27ac_149		chr1	8107210	8107514	SW_K27ac_149		chr1	2358388	2360967	SC_K27ac_149		chr1	6306971	6307277	HT1376_K27ac_149		chr1	1798690	1798855	T1_H3K27ac_1_149		chr1	115297653	115301336	T3_H3K27ac_149		chr19	39891285	39905006	T4_H3K27ac_149		chr5	43063648	43069105	T5_H3K27ac_149
	chr1	6549007	6549800	RT4_K27ac_150		chr1	8107658	8107957	SW_K27ac_150		chr1	2362973	2363540	SC_K27ac_150		chr1	6319712	6320243	HT1376_K27ac_150		chr1	1819335	1819635	T1_H3K27ac_1_150		chr12	49581122	49583680	T3_H3K27ac_150		chr12	69979125	69980180	T4_H3K27ac_150		chr20	23341274	23343988	T5_H3K27ac_150
	chr1	6550166	6551535	RT4_K27ac_151		chr1	8108182	8108525	SW_K27ac_151		chr1	2382258	2382750	SC_K27ac_151		chr1	6410047	6410559	HT1376_K27ac_151		chr1	1820031	1820407	T1_H3K27ac_1_151		chr1	27814379	27819224	T3_H3K27ac_151		chr1	151030302	151032975	T4_H3K27ac_151		chr1	153605755	153607869	T5_H3K27ac_151
	chr1	6613991	6614877	RT4_K27ac_152		chr1	8119505	8120105	SW_K27ac_152		chr1	2382815	2383295	SC_K27ac_152		chr1	6413100	6414631	HT1376_K27ac_152		chr1	1820776	1823999	T1_H3K27ac_1_152		chr19	18389268	18392376	T3_H3K27ac_152		chr17	79478696	79483427	T4_H3K27ac_152		chr11	75272298	75276235	T5_H3K27ac_152
	chr1	6640057	6640381	RT4_K27ac_153		chr1	8120802	8121513	SW_K27ac_153		chr1	2383506	2385771	SC_K27ac_153		chr1	6418353	6420511	HT1376_K27ac_153		chr1	1824172	1824470	T1_H3K27ac_1_153		chr19	36235043	36237745	T3_H3K27ac_153		chr5	137910026	137912188	T4_H3K27ac_153		chr17	80185604	80190664	T5_H3K27ac_153
	chr1	6647449	6648532	RT4_K27ac_154		chr1	8121615	8122719	SW_K27ac_154		chr1	2425976	2426254	SC_K27ac_154		chr1	6433325	6433928	HT1376_K27ac_154		chr1	1829936	1830409	T1_H3K27ac_1_154		chr22	39914814	39919620	T3_H3K27ac_154		chr17	2299007	2306240	T4_H3K27ac_154		chr12	30905455	30909440	T5_H3K27ac_154
	chr1	6660510	6662898	RT4_K27ac_155		chr1	8130580	8131017	SW_K27ac_155		chr1	2431221	2431427	SC_K27ac_155		chr1	6434145	6434689	HT1376_K27ac_155		chr1	1838186	1838818	T1_H3K27ac_1_155		chr5	43063666	43068740	T3_H3K27ac_155		chr20	43513720	43515154	T4_H3K27ac_155		chr5	179243827	179249073	T5_H3K27ac_155
	chr1	6669772	6670244	RT4_K27ac_156		chr1	8135229	8135616	SW_K27ac_156		chr1	2454194	2456096	SC_K27ac_156		chr1	6441894	6442868	HT1376_K27ac_156		chr1	1839647	1840504	T1_H3K27ac_1_156		chr19	50378634	50382107	T3_H3K27ac_156		chr21	34913346	34916783	T4_H3K27ac_156		chr2	220142094	220145892	T5_H3K27ac_156
	chr1	6672748	6673499	RT4_K27ac_157		chr1	8135808	8136078	SW_K27ac_157		chr1	2456673	2457685	SC_K27ac_157		chr1	6445199	6446839	HT1376_K27ac_157		chr1	1840794	1841209	T1_H3K27ac_1_157		chr17	20943725	20946437	T3_H3K27ac_157		chr13	48806135	48809885	T4_H3K27ac_157		chr12	27165311	27169531	T5_H3K27ac_157
	chr1	6673852	6675110	RT4_K27ac_158		chr1	8136297	8136726	SW_K27ac_158		chr1	2457848	2458038	SC_K27ac_158		chr1	6452780	6454548	HT1376_K27ac_158		chr1	1981217	1981588	T1_H3K27ac_1_158		chr17	80604185	80606461	T3_H3K27ac_158		chr10	27442394	27445719	T4_H3K27ac_158		chr20	32698103	32701340	T5_H3K27ac_158
	chr1	6684805	6685761	RT4_K27ac_159		chr1	8136883	8139214	SW_K27ac_159		chr1	2458141	2458405	SC_K27ac_159		chr1	6473237	6475877	HT1376_K27ac_159		chr1	1981889	1982462	T1_H3K27ac_1_159		chr1	159890481	159896601	T3_H3K27ac_159		chr19	18630159	18633013	T4_H3K27ac_159		chr3	41239995	41244279	T5_H3K27ac_159
	chr1	6761023	6762156	RT4_K27ac_160		chr1	8143732	8143941	SW_K27ac_160		chr1	2462397	2462628	SC_K27ac_160		chr1	6479504	6479941	HT1376_K27ac_160		chr1	2063443	2064597	T1_H3K27ac_1_160		chr2	43444481	43456684	T3_H3K27ac_160		chr11	66608916	66611795	T4_H3K27ac_160		chr19	40930109	40932593	T5_H3K27ac_160
	chr1	6803046	6804197	RT4_K27ac_161		chr1	8149651	8150153	SW_K27ac_161		chr1	2463754	2464003	SC_K27ac_161		chr1	6487508	6488252	HT1376_K27ac_161		chr1	2065153	2065594	T1_H3K27ac_1_161		chr12	8177777	8180322	T3_H3K27ac_161		chr6	24718512	24722691	T4_H3K27ac_161		chr12	12866332	12880519	T5_H3K27ac_161
	chr1	6844184	6845133	RT4_K27ac_162		chr1	8150434	8151661	SW_K27ac_162		chr1	2464340	2464944	SC_K27ac_162		chr1	6498519	6500244	HT1376_K27ac_162		chr1	2066298	2066527	T1_H3K27ac_1_162		chr6	155053873	155056100	T3_H3K27ac_162		chr17	27069742	27074667	T4_H3K27ac_162		chr11	85774943	85781995	T5_H3K27ac_162
	chr1	6845904	6846227	RT4_K27ac_163		chr1	8155120	8155351	SW_K27ac_163		chr1	2465013	2465595	SC_K27ac_163		chr1	6524313	6524632	HT1376_K27ac_163		chr1	2082127	2082392	T1_H3K27ac_1_163		chr6	32934205	32941833	T3_H3K27ac_163		chr2	86789589	86791064	T4_H3K27ac_163		chr15	89178902	89186013	T5_H3K27ac_163
	chr1	6860737	6861612	RT4_K27ac_164		chr1	8155688	8156666	SW_K27ac_164		chr1	2465947	2466339	SC_K27ac_164		chr1	6531832	6532777	HT1376_K27ac_164		chr1	2120703	2120984	T1_H3K27ac_1_164		chr7	23570003	23572402	T3_H3K27ac_164		chr5	180257044	180260292	T4_H3K27ac_164		chr1	113160074	113163688	T5_H3K27ac_164
	chr1	6879742	6880473	RT4_K27ac_165		chr1	8156911	8157506	SW_K27ac_165		chr1	2466625	2467726	SC_K27ac_165		chr1	6548837	6549985	HT1376_K27ac_165		chr1	2121145	2122854	T1_H3K27ac_1_165		chr12	92526371	92539654	T3_H3K27ac_165		chr5	65220503	65224012	T4_H3K27ac_165		chr2	196520539	196525064	T5_H3K27ac_165
	chr1	6882585	6883430	RT4_K27ac_166		chr1	8157973	8158331	SW_K27ac_166		chr1	2477854	2478428	SC_K27ac_166		chr1	6550158	6551605	HT1376_K27ac_166		chr1	2123862	2124125	T1_H3K27ac_1_166		chr17	7741828	7749285	T3_H3K27ac_166		chr20	34540646	34543504	T4_H3K27ac_166		chr12	31883701	31890431	T5_H3K27ac_166
	chr1	6885940	6886354	RT4_K27ac_167		chr1	8158880	8159134	SW_K27ac_167		chr1	2480410	2480733	SC_K27ac_167		chr1	6556970	6557408	HT1376_K27ac_167		chr1	2125041	2125246	T1_H3K27ac_1_167		chr5	32172062	32175595	T3_H3K27ac_167		chr12	28342648	28344620	T4_H3K27ac_167		chr12	49581377	49584035	T5_H3K27ac_167
	chr1	7740285	7740705	RT4_K27ac_168		chr1	8176362	8176925	SW_K27ac_168		chr1	2487148	2488574	SC_K27ac_168		chr1	6557596	6557894	HT1376_K27ac_168		chr1	2125472	2125700	T1_H3K27ac_1_168		chr2	48130980	48135024	T3_H3K27ac_168		chr14	91974629	91977928	T4_H3K27ac_168		chr19	16184953	16191460	T5_H3K27ac_168
	chr1	7786719	7786983	RT4_K27ac_169		chr1	8177039	8177249	SW_K27ac_169		chr1	2509494	2509770	SC_K27ac_169		chr1	6572962	6574062	HT1376_K27ac_169		chr1	2125971	2127621	T1_H3K27ac_1_169		chr17	8338487	8340778	T3_H3K27ac_169		chr17	7210872	7214042	T4_H3K27ac_169		chr10	32343323	32346417	T5_H3K27ac_169
	chr1	7806322	7807089	RT4_K27ac_170		chr1	8178103	8178536	SW_K27ac_170		chr1	2516894	2518145	SC_K27ac_170		chr1	6613939	6614665	HT1376_K27ac_170		chr1	2129982	2130848	T1_H3K27ac_1_170		chr9	86593729	86596641	T3_H3K27ac_170		chr19	50878959	50880733	T4_H3K27ac_170		chr2	136499190	136502565	T5_H3K27ac_170
	chr1	7830978	7831181	RT4_K27ac_171		chr1	8179626	8183802	SW_K27ac_171		chr1	2573952	2574677	SC_K27ac_171		chr1	6639479	6641014	HT1376_K27ac_171		chr1	2131007	2131297	T1_H3K27ac_1_171		chr19	12892202	12907823	T3_H3K27ac_171		chr2	178127144	178131074	T4_H3K27ac_171		chr20	48805806	48812302	T5_H3K27ac_171
	chr1	7831344	7832082	RT4_K27ac_172		chr1	8197089	8199011	SW_K27ac_172		chr1	3230115	3230459	SC_K27ac_172		chr1	6660725	6661258	HT1376_K27ac_172		chr1	2134663	2134828	T1_H3K27ac_1_172		chr12	25537555	25540650	T3_H3K27ac_172		chr16	27324676	27330895	T4_H3K27ac_172		chr12	7066656	7074453	T5_H3K27ac_172
	chr1	7841849	7843634	RT4_K27ac_173		chr1	8214483	8214770	SW_K27ac_173		chr1	3370183	3371016	SC_K27ac_173		chr1	6661427	6662864	HT1376_K27ac_173		chr1	2135781	2136282	T1_H3K27ac_1_173		chr12	98986323	98989755	T3_H3K27ac_173		chr14	103799212	103801968	T4_H3K27ac_173		chr19	45504087	45505267	T5_H3K27ac_173
	chr1	7844358	7844727	RT4_K27ac_174		chr1	8215564	8215987	SW_K27ac_174		chr1	3371228	3372121	SC_K27ac_174		chr1	6663055	6664165	HT1376_K27ac_174		chr1	2136812	2137449	T1_H3K27ac_1_174		chr20	34251066	34253537	T3_H3K27ac_174		chr19	2268961	2272903	T4_H3K27ac_174		chr10	33243518	33249095	T5_H3K27ac_174
	chr1	8021184	8022279	RT4_K27ac_175		chr1	8241009	8241536	SW_K27ac_175		chr1	3376004	3377596	SC_K27ac_175		chr1	6672116	6673520	HT1376_K27ac_175		chr1	2137680	2139258	T1_H3K27ac_1_175		chr22	41486588	41490755	T3_H3K27ac_175		chr11	85374727	85376553	T4_H3K27ac_175		chr6	155053393	155056115	T5_H3K27ac_175
	chr1	8064259	8065320	RT4_K27ac_176		chr1	8241710	8242447	SW_K27ac_176		chr1	3378114	3378730	SC_K27ac_176		chr1	6673858	6674223	HT1376_K27ac_176		chr1	2139432	2140641	T1_H3K27ac_1_176		chr3	101291790	101294665	T3_H3K27ac_176		chr19	13946026	13956421	T4_H3K27ac_176		chr11	11862431	11866354	T5_H3K27ac_176
	chr1	8065504	8066492	RT4_K27ac_177		chr1	8242822	8244409	SW_K27ac_177		chr1	3379642	3379946	SC_K27ac_177		chr1	6674433	6674720	HT1376_K27ac_177		chr1	2140972	2141491	T1_H3K27ac_1_177		chr11	122930978	122936234	T3_H3K27ac_177		chr9	35070491	35073509	T4_H3K27ac_177		chr12	6472173	6473824	T5_H3K27ac_177
	chr1	8067001	8067428	RT4_K27ac_178		chr1	8253944	8254706	SW_K27ac_178		chr1	3381359	3383107	SC_K27ac_178		chr1	6682467	6684380	HT1376_K27ac_178		chr1	2142137	2142576	T1_H3K27ac_1_178		chr1	22107790	22110824	T3_H3K27ac_178		chr7	108165384	108167532	T4_H3K27ac_178		chr2	61695696	61699649	T5_H3K27ac_178
	chr1	8078070	8078309	RT4_K27ac_179		chr1	8254928	8256030	SW_K27ac_179		chr1	3383195	3383639	SC_K27ac_179		chr1	6684710	6685638	HT1376_K27ac_179		chr1	2143409	2146506	T1_H3K27ac_1_179		chr10	38145549	38147739	T3_H3K27ac_179		chr19	56164676	56167885	T4_H3K27ac_179		chr12	46382871	46384435	T5_H3K27ac_179
	chr1	8080628	8080972	RT4_K27ac_180		chr1	8257945	8258622	SW_K27ac_180		chr1	3383826	3384496	SC_K27ac_180		chr1	6744110	6744348	HT1376_K27ac_180		chr1	2148107	2148307	T1_H3K27ac_1_180		chr4	15002368	15007801	T3_H3K27ac_180		chr17	8338410	8340570	T4_H3K27ac_180		chr1	16159665	16164277	T5_H3K27ac_180
	chr1	8085428	8086874	RT4_K27ac_181		chr1	8260058	8264605	SW_K27ac_181		chr1	3384596	3385723	SC_K27ac_181		chr1	6761005	6761937	HT1376_K27ac_181		chr1	2158210	2159125	T1_H3K27ac_1_181		chr7	139042434	139045988	T3_H3K27ac_181		chr6	32162831	32165117	T4_H3K27ac_181		chr1	155176858	155179500	T5_H3K27ac_181
	chr1	8105745	8106900	RT4_K27ac_182		chr1	8264951	8265424	SW_K27ac_182		chr1	3387540	3388558	SC_K27ac_182		chr1	6844148	6845168	HT1376_K27ac_182		chr1	2160182	2164612	T1_H3K27ac_1_182		chr8	64079173	64082541	T3_H3K27ac_182		chr9	91924781	91926924	T4_H3K27ac_182		chr11	65183371	65196274	T5_H3K27ac_182
	chr1	8121039	8122783	RT4_K27ac_183		chr1	8271283	8272417	SW_K27ac_183		chr1	3388696	3389444	SC_K27ac_183		chr1	7462176	7463052	HT1376_K27ac_183		chr1	2164916	2167731	T1_H3K27ac_1_183		chr1	226248011	226252210	T3_H3K27ac_183		chr3	178865031	178867466	T4_H3K27ac_183		chr3	5017442	5029977	T5_H3K27ac_183
	chr1	8130197	8130968	RT4_K27ac_184		chr1	8284609	8284918	SW_K27ac_184		chr1	3397133	3397654	SC_K27ac_184		chr1	7530703	7531745	HT1376_K27ac_184		chr1	2168575	2168817	T1_H3K27ac_1_184		chr14	23339519	23342539	T3_H3K27ac_184		chr21	37691481	37695059	T4_H3K27ac_184		chr14	64967093	64975336	T5_H3K27ac_184
	chr1	8136393	8136694	RT4_K27ac_185		chr1	8285244	8285743	SW_K27ac_185		chr1	3397724	3398952	SC_K27ac_185		chr1	7586851	7587898	HT1376_K27ac_185		chr1	2169407	2169682	T1_H3K27ac_1_185		chr2	160568132	160570631	T3_H3K27ac_185		chr2	206949037	206952047	T4_H3K27ac_185		chr10	63659262	63665594	T5_H3K27ac_185
	chr1	8136910	8138863	RT4_K27ac_186		chr1	8298416	8299066	SW_K27ac_186		chr1	3399096	3399692	SC_K27ac_186		chr1	7609061	7610714	HT1376_K27ac_186		chr1	2171726	2172240	T1_H3K27ac_1_186		chr11	64004829	64010799	T3_H3K27ac_186		chr10	35415230	35417465	T4_H3K27ac_186		chr17	8063927	8068757	T5_H3K27ac_186
	chr1	8143679	8144575	RT4_K27ac_187		chr1	8299362	8299908	SW_K27ac_187		chr1	3399820	3400419	SC_K27ac_187		chr1	7831115	7832309	HT1376_K27ac_187		chr1	2177888	2178149	T1_H3K27ac_1_187		chr2	70367811	70369747	T3_H3K27ac_187		chr3	19987393	19989758	T4_H3K27ac_187		chr20	34637490	34639348	T5_H3K27ac_187
	chr1	8150502	8151184	RT4_K27ac_188		chr1	8317821	8318182	SW_K27ac_188		chr1	3420433	3420875	SC_K27ac_188		chr1	7842377	7842881	HT1376_K27ac_188		chr1	2179348	2179604	T1_H3K27ac_1_188		chr3	169897185	169899895	T3_H3K27ac_188		chr11	129871448	129874326	T4_H3K27ac_188		chr12	66562702	66564644	T5_H3K27ac_188
	chr1	8156290	8156656	RT4_K27ac_189		chr1	8318470	8318946	SW_K27ac_189		chr1	3421033	3421522	SC_K27ac_189		chr1	7843196	7843696	HT1376_K27ac_189		chr1	2180874	2181154	T1_H3K27ac_1_189		chr10	105879726	105882488	T3_H3K27ac_189		chr1	204376914	204381051	T4_H3K27ac_189		chr2	232570304	232577651	T5_H3K27ac_189
	chr1	8156942	8157770	RT4_K27ac_190		chr1	8319272	8320376	SW_K27ac_190		chr1	3446606	3447760	SC_K27ac_190		chr1	7844330	7845155	HT1376_K27ac_190		chr1	2183016	2183272	T1_H3K27ac_1_190		chr16	71927762	71931223	T3_H3K27ac_190		chr1	228269374	228271979	T4_H3K27ac_190		chr7	157128382	157132896	T5_H3K27ac_190
	chr1	8158018	8158287	RT4_K27ac_191		chr1	8403215	8403474	SW_K27ac_191		chr1	3459035	3460588	SC_K27ac_191		chr1	8021181	8022335	HT1376_K27ac_191		chr1	2184867	2185159	T1_H3K27ac_1_191		chr20	17547151	17553519	T3_H3K27ac_191		chr7	108209234	108211841	T4_H3K27ac_191		chr19	50143676	50146279	T5_H3K27ac_191
	chr1	8164651	8165170	RT4_K27ac_192		chr1	8403616	8404133	SW_K27ac_192		chr1	3540574	3540998	SC_K27ac_192		chr1	8048283	8049560	HT1376_K27ac_192		chr1	2186221	2188292	T1_H3K27ac_1_192		chr6	32153640	32165943	T3_H3K27ac_192		chr15	59979804	59982313	T4_H3K27ac_192		chr2	48131368	48134911	T5_H3K27ac_192
	chr1	8180488	8182426	RT4_K27ac_193		chr1	8482957	8483753	SW_K27ac_193		chr1	3541059	3541290	SC_K27ac_193		chr1	8064275	8066788	HT1376_K27ac_193		chr1	2190313	2190489	T1_H3K27ac_1_193		chr8	126441095	126449349	T3_H3K27ac_193		chr9	132243745	132254468	T4_H3K27ac_193		chr7	104649185	104658654	T5_H3K27ac_193
	chr1	8193200	8194125	RT4_K27ac_194		chr1	8483943	8484413	SW_K27ac_194		chr1	3541762	3542323	SC_K27ac_194		chr1	8079093	8079830	HT1376_K27ac_194		chr1	2191700	2191865	T1_H3K27ac_1_194		chr9	73024238	73037857	T3_H3K27ac_194		chr11	64899461	64903789	T4_H3K27ac_194		chr1	154579552	154582661	T5_H3K27ac_194
	chr1	8197612	8198230	RT4_K27ac_195		chr1	8730816	8731235	SW_K27ac_195		chr1	3566065	3566587	SC_K27ac_195		chr1	8080635	8080978	HT1376_K27ac_195		chr1	2201920	2202333	T1_H3K27ac_1_195		chr6	160146941	160152121	T3_H3K27ac_195		chr12	122983814	122986038	T4_H3K27ac_195		chr20	42085454	42087683	T5_H3K27ac_195
	chr1	8207521	8208149	RT4_K27ac_196		chr1	8762900	8763307	SW_K27ac_196		chr1	3594767	3595568	SC_K27ac_196		chr1	8085412	8086331	HT1376_K27ac_196		chr1	2205978	2206459	T1_H3K27ac_1_196		chr18	32923319	32925973	T3_H3K27ac_196		chr3	135912038	135916598	T4_H3K27ac_196		chr13	50697197	50702133	T5_H3K27ac_196
	chr1	8229494	8229992	RT4_K27ac_197		chr1	8877013	8877668	SW_K27ac_197		chr1	3606779	3607180	SC_K27ac_197		chr1	8086511	8086998	HT1376_K27ac_197		chr1	2206635	2207529	T1_H3K27ac_1_197		chr1	19921935	19925765	T3_H3K27ac_197		chr9	96928371	96930184	T4_H3K27ac_197		chr13	31733917	31737671	T5_H3K27ac_197
	chr1	8230248	8230669	RT4_K27ac_198		chr1	8937029	8939781	SW_K27ac_198		chr1	3615908	3616188	SC_K27ac_198		chr1	8100506	8100979	HT1376_K27ac_198		chr1	2207802	2208344	T1_H3K27ac_1_198		chr3	119811944	119815743	T3_H3K27ac_198		chr3	195807550	195809974	T4_H3K27ac_198		chr12	26984820	26986205	T5_H3K27ac_198
	chr1	8241288	8241568	RT4_K27ac_199		chr1	9144917	9145155	SW_K27ac_199		chr1	3619409	3619750	SC_K27ac_199		chr1	8106286	8106978	HT1376_K27ac_199		chr1	2210402	2211504	T1_H3K27ac_1_199		chr11	65428309	65432219	T3_H3K27ac_199		chr19	18392728	18393955	T4_H3K27ac_199		chr3	101566475	101571076	T5_H3K27ac_199
	chr1	8241722	8243550	RT4_K27ac_200		chr1	9170389	9170633	SW_K27ac_200		chr1	3619835	3620786	SC_K27ac_200		chr1	8107219	8108506	HT1376_K27ac_200		chr1	2221272	2223171	T1_H3K27ac_1_200		chr17	1619786	1622451	T3_H3K27ac_200		chr17	40539011	40542175	T4_H3K27ac_200		chr10	28820817	28823683	T5_H3K27ac_200
	chr1	8253943	8255718	RT4_K27ac_201		chr1	9172338	9173122	SW_K27ac_201		chr1	3628088	3628433	SC_K27ac_201		chr1	8130469	8130973	HT1376_K27ac_201		chr1	2223555	2223849	T1_H3K27ac_1_201		chr6	116599304	116602034	T3_H3K27ac_201		chr11	61196558	61198160	T4_H3K27ac_201		chr2	178125352	178131049	T5_H3K27ac_201
	chr1	8261688	8262260	RT4_K27ac_202		chr1	9173339	9173835	SW_K27ac_202		chr1	3628893	3629254	SC_K27ac_202		chr1	8136965	8138838	HT1376_K27ac_202		chr1	2224330	2224633	T1_H3K27ac_1_202		chr1	234851007	234864659	T3_H3K27ac_202		chr8	37962039	37963595	T4_H3K27ac_202		chr5	137909839	137912363	T5_H3K27ac_202
	chr1	8262521	8264458	RT4_K27ac_203		chr1	9188224	9188677	SW_K27ac_203		chr1	3629317	3629854	SC_K27ac_203		chr1	8149575	8150131	HT1376_K27ac_203		chr1	2226243	2226621	T1_H3K27ac_1_203		chr1	245131264	245136038	T3_H3K27ac_203		chr16	3332408	3334217	T4_H3K27ac_203		chr5	179049239	179052190	T5_H3K27ac_203
	chr1	8271542	8272773	RT4_K27ac_204		chr1	9188847	9189132	SW_K27ac_204		chr1	3633711	3633957	SC_K27ac_204		chr1	8150361	8151360	HT1376_K27ac_204		chr1	2231370	2231811	T1_H3K27ac_1_204		chr15	79164323	79167317	T3_H3K27ac_204		chr7	55432989	55434739	T4_H3K27ac_204		chr12	51631766	51634132	T5_H3K27ac_204
	chr1	8298689	8299725	RT4_K27ac_205		chr1	9222180	9223032	SW_K27ac_205		chr1	3688469	3688954	SC_K27ac_205		chr1	8156213	8156658	HT1376_K27ac_205		chr1	2232129	2233605	T1_H3K27ac_1_205		chr1	91486165	91488484	T3_H3K27ac_205		chr4	78738489	78744107	T4_H3K27ac_205		chr1	156715420	156722504	T5_H3K27ac_205
	chr1	8318479	8318955	RT4_K27ac_206		chr1	9223180	9225622	SW_K27ac_206		chr1	3712164	3713413	SC_K27ac_206		chr1	8156945	8157838	HT1376_K27ac_206		chr1	2236148	2236318	T1_H3K27ac_1_206		chr7	105922586	105927095	T3_H3K27ac_206		chrX	12991008	12998653	T4_H3K27ac_206		chr11	65255353	65277540	T5_H3K27ac_206
	chr1	8319178	8320336	RT4_K27ac_207		chr1	9241482	9243040	SW_K27ac_207		chr1	3773096	3773803	SC_K27ac_207		chr1	8157991	8158297	HT1376_K27ac_207		chr1	2242613	2243043	T1_H3K27ac_1_207		chr2	64878786	64882087	T3_H3K27ac_207		chrX	153235244	153239920	T4_H3K27ac_207		chr1	24284700	24288099	T5_H3K27ac_207
	chr1	8403061	8404105	RT4_K27ac_208		chr1	9294801	9295596	SW_K27ac_208		chr1	3774383	3774671	SC_K27ac_208		chr1	8180467	8181852	HT1376_K27ac_208		chr1	2243241	2243447	T1_H3K27ac_1_208		chr17	34899453	34903100	T3_H3K27ac_208		chr2	54342067	54343441	T4_H3K27ac_208		chr15	45021247	45023225	T5_H3K27ac_208
	chr1	8415324	8415831	RT4_K27ac_209		chr1	9350505	9350914	SW_K27ac_209		chr1	3816055	3817971	SC_K27ac_209		chr1	8193864	8194116	HT1376_K27ac_209		chr1	2244270	2245381	T1_H3K27ac_1_209		chr4	56261331	56265963	T3_H3K27ac_209		chr16	81037289	81042506	T4_H3K27ac_209		chr11	66609795	66611626	T5_H3K27ac_209
	chr1	8455236	8455805	RT4_K27ac_210		chr1	9353115	9354114	SW_K27ac_210		chr1	4711031	4711340	SC_K27ac_210		chr1	8241664	8243645	HT1376_K27ac_210		chr1	2245546	2246628	T1_H3K27ac_1_210		chr1	100502303	100505806	T3_H3K27ac_210		chr1	152006561	152011237	T4_H3K27ac_210		chr12	7078502	7081091	T5_H3K27ac_210
	chr1	8457279	8457622	RT4_K27ac_211		chr1	9359705	9360323	SW_K27ac_211		chr1	4712808	4713091	SC_K27ac_211		chr1	8257526	8258400	HT1376_K27ac_211		chr1	2246805	2246975	T1_H3K27ac_1_211		chr12	12713341	12717534	T3_H3K27ac_211		chr19	1256445	1263765	T4_H3K27ac_211		chr14	69440731	69448726	T5_H3K27ac_211
	chr1	8467668	8469512	RT4_K27ac_212		chr1	9360472	9361574	SW_K27ac_212		chr1	5483825	5484038	SC_K27ac_212		chr1	8261551	8262244	HT1376_K27ac_212		chr1	2252896	2253061	T1_H3K27ac_1_212		chr14	55517567	55520482	T3_H3K27ac_212		chr18	29671401	29673925	T4_H3K27ac_212		chr14	68140460	68142229	T5_H3K27ac_212
	chr1	8471829	8473075	RT4_K27ac_213		chr1	9472742	9474254	SW_K27ac_213		chr1	5484580	5484835	SC_K27ac_213		chr1	8262435	8263169	HT1376_K27ac_213		chr1	2253864	2254356	T1_H3K27ac_1_213		chr19	11197478	11208200	T3_H3K27ac_213		chr10	43899320	43906771	T4_H3K27ac_213		chr12	133336058	133339970	T5_H3K27ac_213
	chr1	8482604	8484805	RT4_K27ac_214		chr1	9599594	9600270	SW_K27ac_214		chr1	6051539	6052622	SC_K27ac_214		chr1	8264245	8264529	HT1376_K27ac_214		chr1	2266008	2266426	T1_H3K27ac_1_214		chr15	45016706	45023167	T3_H3K27ac_214		chr14	70232878	70235115	T4_H3K27ac_214		chr12	70635480	70638966	T5_H3K27ac_214
	chr1	8499073	8499395	RT4_K27ac_215		chr1	9731747	9732147	SW_K27ac_215		chr1	6052801	6053056	SC_K27ac_215		chr1	8271295	8272734	HT1376_K27ac_215		chr1	2266610	2267036	T1_H3K27ac_1_215		chr8	103665547	103671179	T3_H3K27ac_215		chr19	1247536	1254539	T4_H3K27ac_215		chr4	77995173	77998792	T5_H3K27ac_215
	chr1	8508771	8509727	RT4_K27ac_216		chr1	9826087	9826582	SW_K27ac_216		chr1	6053528	6054353	SC_K27ac_216		chr1	8298386	8299990	HT1376_K27ac_216		chr1	2267205	2267529	T1_H3K27ac_1_216		chr11	65183764	65199812	T3_H3K27ac_216		chr11	122932096	122935874	T4_H3K27ac_216		chr5	32583344	32586750	T5_H3K27ac_216
	chr1	8523272	8523961	RT4_K27ac_217		chr1	9827179	9827501	SW_K27ac_217		chr1	6085352	6086186	SC_K27ac_217		chr1	8318503	8320318	HT1376_K27ac_217		chr1	2284149	2284524	T1_H3K27ac_1_217		chr12	10363982	10368394	T3_H3K27ac_217		chr2	25193500	25195882	T4_H3K27ac_217		chr5	96142058	96144531	T5_H3K27ac_217
	chr1	8585356	8586323	RT4_K27ac_218		chr1	9883161	9884004	SW_K27ac_218		chr1	6133804	6134522	SC_K27ac_218		chr1	8455737	8455932	HT1376_K27ac_218		chr1	2299803	2299968	T1_H3K27ac_1_218		chr12	58238149	58241485	T3_H3K27ac_218		chr6	88409430	88413290	T4_H3K27ac_218		chr16	24550213	24553978	T5_H3K27ac_218
	chr1	8599676	8600547	RT4_K27ac_219		chr1	9884313	9885523	SW_K27ac_219		chr1	6258150	6258501	SC_K27ac_219		chr1	8456965	8457534	HT1376_K27ac_219		chr1	2322441	2323015	T1_H3K27ac_1_219		chr10	88280448	88282252	T3_H3K27ac_219		chr19	29703063	29704310	T4_H3K27ac_219		chr12	57079395	57084368	T5_H3K27ac_219
	chr1	8601143	8601616	RT4_K27ac_220		chr1	9886615	9887485	SW_K27ac_220		chr1	6258704	6259719	SC_K27ac_220		chr1	8483102	8483777	HT1376_K27ac_220		chr1	2323251	2323971	T1_H3K27ac_1_220		chr17	56083418	56085550	T3_H3K27ac_220		chr1	1509142	1511029	T4_H3K27ac_220		chr7	39987699	39991956	T5_H3K27ac_220
	chr1	8612242	8612491	RT4_K27ac_221		chr1	9887722	9888352	SW_K27ac_221		chr1	6259810	6260380	SC_K27ac_221		chr1	8483934	8484473	HT1376_K27ac_221		chr1	2328019	2328441	T1_H3K27ac_1_221		chr12	72055372	72058954	T3_H3K27ac_221		chr5	68664321	68666602	T4_H3K27ac_221		chr8	48648326	48651824	T5_H3K27ac_221
	chr1	8626182	8626473	RT4_K27ac_222		chr1	9895957	9896517	SW_K27ac_222		chr1	6265428	6267113	SC_K27ac_222		chr1	8499153	8499431	HT1376_K27ac_222		chr1	2328637	2329144	T1_H3K27ac_1_222		chr18	9913371	9917018	T3_H3K27ac_222		chr2	174826873	174831180	T4_H3K27ac_222		chr15	79164218	79168109	T5_H3K27ac_222
	chr1	8631424	8632867	RT4_K27ac_223		chr1	9942459	9942694	SW_K27ac_223		chr1	6278968	6279707	SC_K27ac_223		chr1	8523664	8524000	HT1376_K27ac_223		chr1	2343435	2343985	T1_H3K27ac_1_223		chr5	180256383	180260440	T3_H3K27ac_223		chr5	32173054	32175754	T4_H3K27ac_223		chr20	10650361	10656882	T5_H3K27ac_223
	chr1	8702896	8703331	RT4_K27ac_224		chr1	9952785	9953362	SW_K27ac_224		chr1	6279865	6281268	SC_K27ac_224		chr1	8585313	8586340	HT1376_K27ac_224		chr1	2344206	2345373	T1_H3K27ac_1_224		chr6	88407212	88413098	T3_H3K27ac_224		chr6	27803919	27807887	T4_H3K27ac_224		chr1	1549970	1552019	T5_H3K27ac_224
	chr1	8703607	8703969	RT4_K27ac_225		chr1	10002855	10003418	SW_K27ac_225		chr1	6282666	6283216	SC_K27ac_225		chr1	8613867	8614265	HT1376_K27ac_225		chr1	2345560	2345922	T1_H3K27ac_1_225		chr15	93425865	93428810	T3_H3K27ac_225		chr14	102275645	102278129	T4_H3K27ac_225		chr2	38825318	38830896	T5_H3K27ac_225
	chr1	8704136	8705216	RT4_K27ac_226		chr1	10093092	10093511	SW_K27ac_226		chr1	6294994	6295671	SC_K27ac_226		chr1	8730086	8730321	HT1376_K27ac_226		chr1	2347012	2348580	T1_H3K27ac_1_226		chr10	63658616	63665893	T3_H3K27ac_226		chr16	56963793	56967926	T4_H3K27ac_226		chr6	44213095	44216646	T5_H3K27ac_226
	chr1	8721400	8721851	RT4_K27ac_227		chr1	10143604	10143804	SW_K27ac_227		chr1	6296170	6296618	SC_K27ac_227		chr1	8762924	8763846	HT1376_K27ac_227		chr1	2360299	2360946	T1_H3K27ac_1_227		chr17	42274465	42278548	T3_H3K27ac_227		chr17	45973462	45974757	T4_H3K27ac_227		chr10	35414730	35417522	T5_H3K27ac_227
	chr1	8726281	8726638	RT4_K27ac_228		chr1	10144037	10144312	SW_K27ac_228		chr1	6320287	6320928	SC_K27ac_228		chr1	8876939	8878312	HT1376_K27ac_228		chr1	2455081	2455303	T1_H3K27ac_1_228		chr7	100025622	100028953	T3_H3K27ac_228		chr22	29662526	29666125	T4_H3K27ac_228		chr12	49523823	49526573	T5_H3K27ac_228
	chr1	8730098	8731281	RT4_K27ac_229		chr1	10270088	10270345	SW_K27ac_229		chr1	6327142	6327488	SC_K27ac_229		chr1	8889265	8890150	HT1376_K27ac_229		chr1	2457381	2457630	T1_H3K27ac_1_229		chr9	96928341	96930826	T3_H3K27ac_229		chr17	17738579	17741817	T4_H3K27ac_229		chr20	45980109	45991393	T5_H3K27ac_229
	chr1	8740091	8741317	RT4_K27ac_230		chr1	10270738	10271554	SW_K27ac_230		chr1	6354213	6355532	SC_K27ac_230		chr1	8937169	8937926	HT1376_K27ac_230		chr1	2457881	2458531	T1_H3K27ac_1_230		chr3	135911692	135916757	T3_H3K27ac_230		chr7	26238177	26242432	T4_H3K27ac_230		chr6	47444724	47447504	T5_H3K27ac_230
	chr1	8761741	8762372	RT4_K27ac_231		chr1	10447845	10448137	SW_K27ac_231		chr1	6359490	6361748	SC_K27ac_231		chr1	8938134	8939517	HT1376_K27ac_231		chr1	2477187	2477522	T1_H3K27ac_1_231		chr1	45264095	45280216	T3_H3K27ac_231		chr17	66242968	66244886	T4_H3K27ac_231		chr16	31884606	31890226	T5_H3K27ac_231
	chr1	8762821	8763619	RT4_K27ac_232		chr1	10459085	10459610	SW_K27ac_232		chr1	6361807	6362919	SC_K27ac_232		chr1	8963067	8964811	HT1376_K27ac_232		chr1	2477768	2481573	T1_H3K27ac_1_232		chr1	153504000	153510421	T3_H3K27ac_232		chr21	38444165	38446814	T4_H3K27ac_232		chr2	28612268	28623070	T5_H3K27ac_232
	chr1	8772239	8773081	RT4_K27ac_233		chr1	10474601	10474772	SW_K27ac_233		chr1	6377417	6377668	SC_K27ac_233		chr1	8965380	8966023	HT1376_K27ac_233		chr1	2486475	2488877	T1_H3K27ac_1_233		chr16	27324295	27347039	T3_H3K27ac_233		chr12	46383151	46384514	T4_H3K27ac_233		chr6	33279755	33283482	T5_H3K27ac_233
	chr1	8793947	8794170	RT4_K27ac_234		chr1	10474969	10475831	SW_K27ac_234		chr1	6382366	6382675	SC_K27ac_234		chr1	8970981	8972264	HT1376_K27ac_234		chr1	2507566	2507991	T1_H3K27ac_1_234		chr19	1247095	1264025	T3_H3K27ac_234		chr16	48418839	48420128	T4_H3K27ac_234		chr6	3067927	3070774	T5_H3K27ac_234
	chr1	8802554	8802765	RT4_K27ac_235		chr1	10476105	10476406	SW_K27ac_235		chr1	6385683	6386316	SC_K27ac_235		chr1	9045916	9047143	HT1376_K27ac_235		chr1	2508211	2510865	T1_H3K27ac_1_235		chr2	219080919	219086573	T3_H3K27ac_235		chr4	185393120	185398383	T4_H3K27ac_235		chr8	98655056	98657831	T5_H3K27ac_235
	chr1	8849561	8850244	RT4_K27ac_236		chr1	10490525	10490722	SW_K27ac_236		chr1	6404476	6404690	SC_K27ac_236		chr1	9128663	9128853	HT1376_K27ac_236		chr1	2513483	2513679	T1_H3K27ac_1_236		chr3	48512959	48515350	T3_H3K27ac_236		chr2	232571051	232577113	T4_H3K27ac_236		chr12	7033256	7039218	T5_H3K27ac_236
	chr1	8876964	8878332	RT4_K27ac_237		chr1	10490873	10491271	SW_K27ac_237		chr1	6408519	6409421	SC_K27ac_237		chr1	9129311	9129956	HT1376_K27ac_237		chr1	2514947	2515659	T1_H3K27ac_1_237		chr1	19808142	19814617	T3_H3K27ac_237		chr6	151710125	151714375	T4_H3K27ac_237		chr11	114269607	114272744	T5_H3K27ac_237
	chr1	8918171	8918505	RT4_K27ac_238		chr1	10532054	10532547	SW_K27ac_238		chr1	6409962	6411037	SC_K27ac_238		chr1	9140509	9141258	HT1376_K27ac_238		chr1	2516033	2517976	T1_H3K27ac_1_238		chr19	16184146	16192623	T3_H3K27ac_238		chr16	71841576	71843902	T4_H3K27ac_238		chr15	74285897	74290486	T5_H3K27ac_238
	chr1	8937761	8939722	RT4_K27ac_239		chr1	10534992	10535797	SW_K27ac_239		chr1	6418302	6420566	SC_K27ac_239		chr1	9144338	9145278	HT1376_K27ac_239		chr1	2518262	2518930	T1_H3K27ac_1_239		chr6	41038320	41043218	T3_H3K27ac_239		chr11	58343577	58347746	T4_H3K27ac_239		chr16	71928026	71930792	T5_H3K27ac_239
	chr1	8963652	8964715	RT4_K27ac_240		chr1	10555404	10556120	SW_K27ac_240		chr1	6427336	6427927	SC_K27ac_240		chr1	9145445	9145958	HT1376_K27ac_240		chr1	2524426	2524620	T1_H3K27ac_1_240		chr5	138940224	138942577	T3_H3K27ac_240		chr5	43064054	43068115	T4_H3K27ac_240		chr16	9185380	9188039	T5_H3K27ac_240
	chr1	8970941	8972283	RT4_K27ac_241		chr1	10556370	10556897	SW_K27ac_241		chr1	6428020	6428974	SC_K27ac_241		chr1	9183974	9184374	HT1376_K27ac_241		chr1	2573923	2574721	T1_H3K27ac_1_241		chr9	33023946	33026742	T3_H3K27ac_241		chr1	245132545	245135746	T4_H3K27ac_241		chr2	38976640	38979263	T5_H3K27ac_241
	chr1	9061315	9062002	RT4_K27ac_242		chr1	10588146	10588431	SW_K27ac_242		chr1	6441490	6441961	SC_K27ac_242		chr1	9188409	9189229	HT1376_K27ac_242		chr1	2696256	2696477	T1_H3K27ac_1_242		chr2	24147025	24151266	T3_H3K27ac_242		chr11	206511	209488	T4_H3K27ac_242		chr7	35733213	35736506	T5_H3K27ac_242
	chr1	9062188	9062629	RT4_K27ac_243		chr1	10659045	10659544	SW_K27ac_243		chr1	6442032	6443251	SC_K27ac_243		chr1	9189509	9189975	HT1376_K27ac_243		chr1	2960262	2960427	T1_H3K27ac_1_243		chr14	35342177	35345117	T3_H3K27ac_243		chr20	32580221	32583001	T4_H3K27ac_243		chr16	27324074	27331194	T5_H3K27ac_243
	chr1	9144298	9146606	RT4_K27ac_244		chr1	10660207	10660700	SW_K27ac_244		chr1	6445108	6446766	SC_K27ac_244		chr1	9222583	9223120	HT1376_K27ac_244		chr1	2986333	2986664	T1_H3K27ac_1_244		chr5	137087852	137091176	T3_H3K27ac_244		chr8	103422620	103425575	T4_H3K27ac_244		chr8	71518550	71521239	T5_H3K27ac_244
	chr1	9172192	9173855	RT4_K27ac_245		chr1	10695037	10695405	SW_K27ac_245		chr1	6453551	6454575	SC_K27ac_245		chr1	9235997	9236393	HT1376_K27ac_245		chr1	3087404	3087720	T1_H3K27ac_1_245		chr7	27778511	27781235	T3_H3K27ac_245		chr1	29507139	29509355	T4_H3K27ac_245		chr5	42989279	42995913	T5_H3K27ac_245
	chr1	9188451	9189199	RT4_K27ac_246		chr1	10696078	10696362	SW_K27ac_246		chr1	6473740	6473950	SC_K27ac_246		chr1	9241641	9243186	HT1376_K27ac_246		chr1	3112434	3112648	T1_H3K27ac_1_246		chr1	185284297	185287850	T3_H3K27ac_246		chr14	60714119	60717002	T4_H3K27ac_246		chr6	24718390	24722977	T5_H3K27ac_246
	chr1	9189470	9190031	RT4_K27ac_247		chr1	10745741	10746211	SW_K27ac_247		chr1	6474182	6475586	SC_K27ac_247		chr1	9294391	9294634	HT1376_K27ac_247		chr1	3136111	3136276	T1_H3K27ac_1_247		chr3	9436357	9443196	T3_H3K27ac_247		chr5	137088630	137091113	T4_H3K27ac_247		chr4	186315468	186318766	T5_H3K27ac_247
	chr1	9206937	9207338	RT4_K27ac_248		chr1	10746370	10748030	SW_K27ac_248		chr1	6479699	6479925	SC_K27ac_248		chr1	9294798	9295601	HT1376_K27ac_248		chr1	3136767	3137081	T1_H3K27ac_1_248		chr11	58340141	58348672	T3_H3K27ac_248		chr1	35657492	35658837	T4_H3K27ac_248		chr1	91486081	91488565	T5_H3K27ac_248
	chr1	9222370	9225074	RT4_K27ac_249		chr1	10753612	10754158	SW_K27ac_249		chr1	6507145	6507957	SC_K27ac_249		chr1	9304301	9304699	HT1376_K27ac_249		chr1	3229969	3230853	T1_H3K27ac_1_249		chr17	7475242	7479341	T3_H3K27ac_249		chr8	145009566	145018758	T4_H3K27ac_249		chr3	186499779	186502899	T5_H3K27ac_249
	chr1	9241566	9243195	RT4_K27ac_250		chr1	10764472	10764660	SW_K27ac_250		chr1	6508432	6508675	SC_K27ac_250		chr1	9319263	9320402	HT1376_K27ac_250		chr1	3282973	3283144	T1_H3K27ac_1_250		chr3	169489536	169491977	T3_H3K27ac_250		chr14	35342295	35345731	T4_H3K27ac_250		chr7	17338198	17340560	T5_H3K27ac_250
	chr1	9294814	9295654	RT4_K27ac_251		chr1	10821754	10822393	SW_K27ac_251		chr1	6531008	6532801	SC_K27ac_251		chr1	9335793	9336165	HT1376_K27ac_251		chr1	3305492	3305657	T1_H3K27ac_1_251		chr1	160230188	160233519	T3_H3K27ac_251		chr15	93424966	93428356	T4_H3K27ac_251		chr6	26520635	26522946	T5_H3K27ac_251
	chr1	9304923	9305264	RT4_K27ac_252		chr1	10864200	10864714	SW_K27ac_252		chr1	6532855	6533334	SC_K27ac_252		chr1	9340668	9341406	HT1376_K27ac_252		chr1	3370104	3370375	T1_H3K27ac_1_252		chr12	49523229	49527164	T3_H3K27ac_252		chr11	82868089	82872339	T4_H3K27ac_252		chr12	27089462	27093202	T5_H3K27ac_252
	chr1	9353019	9353959	RT4_K27ac_253		chr1	10957831	10958611	SW_K27ac_253		chr1	6533934	6534361	SC_K27ac_253		chr1	9353027	9354090	HT1376_K27ac_253		chr1	3370887	3371582	T1_H3K27ac_1_253		chr15	85290188	85293382	T3_H3K27ac_253		chr16	89283263	89284594	T4_H3K27ac_253		chr10	27147498	27150462	T5_H3K27ac_253
	chr1	9359485	9361548	RT4_K27ac_254		chr1	10960088	10960376	SW_K27ac_254		chr1	6545047	6545558	SC_K27ac_254		chr1	9359577	9361342	HT1376_K27ac_254		chr1	3371824	3371998	T1_H3K27ac_1_254		chr3	56716057	56717856	T3_H3K27ac_254		chr19	54959252	54963384	T4_H3K27ac_254		chr1	245132217	245135916	T5_H3K27ac_254
	chr1	9375574	9376405	RT4_K27ac_255		chr1	10960626	10961525	SW_K27ac_255		chr1	6545774	6546358	SC_K27ac_255		chr1	9375583	9376373	HT1376_K27ac_255		chr1	3375042	3375213	T1_H3K27ac_1_255		chr11	10828103	10831899	T3_H3K27ac_255		chr12	6559448	6563100	T4_H3K27ac_255		chr6	32804758	32807177	T5_H3K27ac_255
	chr1	9398468	9398904	RT4_K27ac_256		chr1	11072296	11073351	SW_K27ac_256		chr1	6547347	6547695	SC_K27ac_256		chr1	9411968	9412470	HT1376_K27ac_256		chr1	3376006	3377559	T1_H3K27ac_1_256		chr7	139874577	139877750	T3_H3K27ac_256		chr13	43563879	43567567	T4_H3K27ac_256		chr9	139794195	139798933	T5_H3K27ac_256
	chr1	9413252	9413682	RT4_K27ac_257		chr1	11119354	11119950	SW_K27ac_257		chr1	6547805	6552582	SC_K27ac_257		chr1	9464195	9464581	HT1376_K27ac_257		chr1	3377841	3378069	T1_H3K27ac_1_257		chr7	75986364	75990178	T3_H3K27ac_257		chr7	39987638	39992108	T4_H3K27ac_257		chr4	174253592	174255590	T5_H3K27ac_257
	chr1	9448588	9449052	RT4_K27ac_258		chr1	11159492	11159897	SW_K27ac_258		chr1	6613278	6613553	SC_K27ac_258		chr1	9464942	9465674	HT1376_K27ac_258		chr1	3408639	3408836	T1_H3K27ac_1_258		chr9	91932217	91935031	T3_H3K27ac_258		chrX	123093206	123097707	T4_H3K27ac_258		chr1	167190095	167192319	T5_H3K27ac_258
	chr1	9460253	9461219	RT4_K27ac_259		chr1	11322172	11322599	SW_K27ac_259		chr1	6613711	6614650	SC_K27ac_259		chr1	9473488	9474090	HT1376_K27ac_259		chr1	3409067	3409251	T1_H3K27ac_1_259		chr7	104647548	104658573	T3_H3K27ac_259		chr17	33307214	33308727	T4_H3K27ac_259		chr6	32162472	32165960	T5_H3K27ac_259
	chr1	9472694	9474245	RT4_K27ac_260		chr1	11333241	11334091	SW_K27ac_260		chr1	6639511	6639829	SC_K27ac_260		chr1	9488574	9489811	HT1376_K27ac_260		chr1	3446921	3447961	T1_H3K27ac_1_260		chr17	7378715	7386006	T3_H3K27ac_260		chr22	46464279	46466969	T4_H3K27ac_260		chr12	1799110	1801176	T5_H3K27ac_260
	chr1	9488726	9489480	RT4_K27ac_261		chr1	11796351	11797102	SW_K27ac_261		chr1	6640023	6640584	SC_K27ac_261		chr1	9509466	9510493	HT1376_K27ac_261		chr1	3448233	3448708	T1_H3K27ac_1_261		chr18	29671093	29674136	T3_H3K27ac_261		chr19	45541561	45543526	T4_H3K27ac_261		chr17	74721029	74724062	T5_H3K27ac_261
	chr1	9572565	9573126	RT4_K27ac_262		chr1	11865131	11865995	SW_K27ac_262		chr1	6641200	6641525	SC_K27ac_262		chr1	9532534	9533108	HT1376_K27ac_262		chr1	3456288	3456486	T1_H3K27ac_1_262		chr16	24550310	24557335	T3_H3K27ac_262		chr3	101292118	101294303	T4_H3K27ac_262		chr9	99178852	99183981	T5_H3K27ac_262
	chr1	9597987	9598316	RT4_K27ac_263		chr1	11866312	11866807	SW_K27ac_263		chr1	6641638	6642019	SC_K27ac_263		chr1	9536535	9536795	HT1376_K27ac_263		chr1	3540667	3541327	T1_H3K27ac_1_263		chr9	132174404	132177877	T3_H3K27ac_263		chr15	31616798	31621391	T4_H3K27ac_263		chr22	29193952	29198220	T5_H3K27ac_263
	chr1	9599532	9600281	RT4_K27ac_264		chr1	11967928	11968282	SW_K27ac_264		chr1	6642218	6642752	SC_K27ac_264		chr1	9598929	9599214	HT1376_K27ac_264		chr1	3541608	3542295	T1_H3K27ac_1_264		chr17	26925635	26927570	T3_H3K27ac_264		chr12	92534558	92539612	T4_H3K27ac_264		chr16	2826555	2828641	T5_H3K27ac_264
	chr1	9648886	9649661	RT4_K27ac_265		chr1	11969199	11969734	SW_K27ac_265		chr1	6659222	6659977	SC_K27ac_265		chr1	9599529	9600346	HT1376_K27ac_265		chr1	3615504	3615670	T1_H3K27ac_1_265		chr15	31617024	31621891	T3_H3K27ac_265		chr6	122792171	122793515	T4_H3K27ac_265		chr5	148928680	148932141	T5_H3K27ac_265
	chr1	9653306	9654272	RT4_K27ac_266		chr1	11969934	11970241	SW_K27ac_266		chr1	6660225	6662908	SC_K27ac_266		chr1	9621037	9622412	HT1376_K27ac_266		chr1	3620952	3621216	T1_H3K27ac_1_266		chr9	86321533	86324198	T3_H3K27ac_266		chr19	1847323	1848938	T4_H3K27ac_266		chr6	29908725	29911927	T5_H3K27ac_266
	chr1	9779198	9779982	RT4_K27ac_267		chr1	11994375	11994617	SW_K27ac_267		chr1	6663076	6663720	SC_K27ac_267		chr1	9648856	9650034	HT1376_K27ac_267		chr1	3773105	3773323	T1_H3K27ac_1_267		chr6	150037125	150040313	T3_H3K27ac_267		chr2	240322557	240324063	T4_H3K27ac_267		chr10	106013884	106016589	T5_H3K27ac_267
	chr1	9818673	9818982	RT4_K27ac_268		chr1	11994806	11995084	SW_K27ac_268		chr1	6669275	6669546	SC_K27ac_268		chr1	9685620	9685965	HT1376_K27ac_268		chr1	3773477	3773677	T1_H3K27ac_1_268		chr19	15946781	15949909	T3_H3K27ac_268		chr7	17337538	17341178	T4_H3K27ac_268		chr10	43890855	43893206	T5_H3K27ac_268
	chr1	9842733	9843146	RT4_K27ac_269		chr1	12040254	12041801	SW_K27ac_269		chr1	6669678	6670312	SC_K27ac_269		chr1	9731269	9731527	HT1376_K27ac_269		chr1	3774030	3774484	T1_H3K27ac_1_269		chr16	30388183	30390953	T3_H3K27ac_269		chr3	52320719	52322931	T4_H3K27ac_269		chr11	694598	698233	T5_H3K27ac_269
	chr1	9864668	9865228	RT4_K27ac_270		chr1	12042517	12042719	SW_K27ac_270		chr1	6670801	6670971	SC_K27ac_270		chr1	9747128	9748346	HT1376_K27ac_270		chr1	3786102	3786539	T1_H3K27ac_1_270		chr2	238600818	238617352	T3_H3K27ac_270		chr8	96144904	96147475	T4_H3K27ac_270		chr14	24628994	24633031	T5_H3K27ac_270
	chr1	9883316	9884076	RT4_K27ac_271		chr1	12049871	12050421	SW_K27ac_271		chr1	6672734	6673487	SC_K27ac_271		chr1	9749633	9750389	HT1376_K27ac_271		chr1	3816296	3817963	T1_H3K27ac_1_271		chr19	39887602	39902739	T3_H3K27ac_271		chr1	100502785	100505702	T4_H3K27ac_271		chr15	44954172	44957694	T5_H3K27ac_271
	chr1	9885851	9886119	RT4_K27ac_272		chr1	12050603	12051622	SW_K27ac_272		chr1	6673809	6675454	SC_K27ac_272		chr1	9758955	9759436	HT1376_K27ac_272		chr1	4630599	4630764	T1_H3K27ac_1_272		chr19	41770059	41773461	T3_H3K27ac_272		chr18	19179366	19181400	T4_H3K27ac_272		chr17	39845097	39846493	T5_H3K27ac_272
	chr1	9895960	9896962	RT4_K27ac_273		chr1	12079612	12080172	SW_K27ac_273		chr1	6684951	6685745	SC_K27ac_273		chr1	9759712	9761384	HT1376_K27ac_273		chr1	4887473	4887756	T1_H3K27ac_1_273		chr2	149401748	149403753	T3_H3K27ac_273		chr3	48954883	48957707	T4_H3K27ac_273		chr22	38899988	38903930	T5_H3K27ac_273
	chr1	9937921	9938350	RT4_K27ac_274		chr1	12192477	12193244	SW_K27ac_274		chr1	6761034	6761951	SC_K27ac_274		chr1	9778784	9779950	HT1376_K27ac_274		chr1	4898125	4898324	T1_H3K27ac_1_274		chr5	137909623	137912237	T3_H3K27ac_274		chr5	138940203	138943110	T4_H3K27ac_274		chr19	39338912	39341020	T5_H3K27ac_274
	chr1	9951330	9951743	RT4_K27ac_275		chr1	12290206	12291421	SW_K27ac_275		chr1	6762071	6762266	SC_K27ac_275		chr1	9826197	9827551	HT1376_K27ac_275		chr1	4910890	4911055	T1_H3K27ac_1_275		chr5	179243461	179248966	T3_H3K27ac_275		chr12	46120271	46125456	T4_H3K27ac_275		chr12	31811426	31813551	T5_H3K27ac_275
	chr1	9952770	9954135	RT4_K27ac_276		chr1	12535090	12535501	SW_K27ac_276		chr1	6803731	6803989	SC_K27ac_276		chr1	9864609	9865444	HT1376_K27ac_276		chr1	5030637	5030982	T1_H3K27ac_1_276		chr22	46406739	46411234	T3_H3K27ac_276		chr7	105922787	105927124	T4_H3K27ac_276		chr10	90748558	90753465	T5_H3K27ac_276
	chr1	9969313	9970122	RT4_K27ac_277		chr1	12536269	12536590	SW_K27ac_277		chr1	6844039	6845156	SC_K27ac_277		chr1	9872474	9873058	HT1376_K27ac_277		chr1	5087559	5087761	T1_H3K27ac_1_277		chr17	41443930	41448108	T3_H3K27ac_277		chr6	30582946	30586946	T4_H3K27ac_277		chr2	241499615	241500513	T5_H3K27ac_277
	chr1	9970736	9971342	RT4_K27ac_278		chr1	12537438	12538382	SW_K27ac_278		chr1	6845992	6846507	SC_K27ac_278		chr1	9883312	9884078	HT1376_K27ac_278		chr1	5389265	5390128	T1_H3K27ac_1_278		chr22	24128229	24130485	T3_H3K27ac_278		chr3	128901291	128903644	T4_H3K27ac_278		chr3	48506637	48509292	T5_H3K27ac_278
	chr1	10002600	10004040	RT4_K27ac_279		chr1	12538590	12539584	SW_K27ac_279		chr1	6919279	6920096	SC_K27ac_279		chr1	9884257	9886197	HT1376_K27ac_279		chr1	5750689	5750946	T1_H3K27ac_1_279		chr7	130789394	130796871	T3_H3K27ac_279		chr16	28833597	28836756	T4_H3K27ac_279		chr6	31322247	31326434	T5_H3K27ac_279
	chr1	10093000	10093987	RT4_K27ac_280		chr1	12539977	12540787	SW_K27ac_280		chr1	6920441	6921819	SC_K27ac_280		chr1	9895977	9896631	HT1376_K27ac_280		chr1	5985980	5986145	T1_H3K27ac_1_280		chr12	96791097	96795707	T3_H3K27ac_280		chr19	47729519	47732233	T4_H3K27ac_280		chr7	100025837	100028769	T5_H3K27ac_280
	chr1	10143445	10144485	RT4_K27ac_281		chr1	12541045	12542129	SW_K27ac_281		chr1	7177564	7178013	SC_K27ac_281		chr1	9925962	9926290	HT1376_K27ac_281		chr1	6027895	6028087	T1_H3K27ac_1_281		chr6	136608850	136612460	T3_H3K27ac_281		chr19	12720868	12723561	T4_H3K27ac_281		chr20	52205217	52212609	T5_H3K27ac_281
	chr1	10166474	10167424	RT4_K27ac_282		chr1	12652784	12653591	SW_K27ac_282		chr1	7326021	7326528	SC_K27ac_282		chr1	9937033	9937397	HT1376_K27ac_282		chr1	6052021	6052522	T1_H3K27ac_1_282		chr22	46458644	46467000	T3_H3K27ac_282		chr2	65355813	65358313	T4_H3K27ac_282		chrX	123094413	123098570	T5_H3K27ac_282
	chr1	10229467	10230592	RT4_K27ac_283		chr1	12653796	12658174	SW_K27ac_283		chr1	7439620	7440109	SC_K27ac_283		chr1	9937810	9938778	HT1376_K27ac_283		chr1	6052801	6054014	T1_H3K27ac_1_283		chr18	12701639	12704192	T3_H3K27ac_283		chr20	45978254	45987916	T4_H3K27ac_283		chr6	90059879	90063613	T5_H3K27ac_283
	chr1	10231080	10231765	RT4_K27ac_284		chr1	12658904	12659644	SW_K27ac_284		chr1	7460715	7461004	SC_K27ac_284		chr1	9950672	9951119	HT1376_K27ac_284		chr1	6054278	6054743	T1_H3K27ac_1_284		chr17	58601700	58604349	T3_H3K27ac_284		chr18	11907973	11910221	T4_H3K27ac_284		chr7	32928425	32933460	T5_H3K27ac_284
	chr1	10269893	10270381	RT4_K27ac_285		chr1	12661043	12661546	SW_K27ac_285		chr1	7461522	7461981	SC_K27ac_285		chr1	9951425	9951768	HT1376_K27ac_285		chr1	6055108	6055300	T1_H3K27ac_1_285		chr2	198298769	198301260	T3_H3K27ac_285		chr12	12873510	12880060	T4_H3K27ac_285		chr9	132144277	132146878	T5_H3K27ac_285
	chr1	10270588	10271749	RT4_K27ac_286		chr1	12662229	12663261	SW_K27ac_286		chr1	7462176	7464062	SC_K27ac_286		chr1	9952038	9952479	HT1376_K27ac_286		chr1	6085717	6086152	T1_H3K27ac_1_286		chr1	40838963	40843608	T3_H3K27ac_286		chr16	24550266	24554028	T4_H3K27ac_286		chr1	109203004	109205009	T5_H3K27ac_286
	chr1	10277811	10278724	RT4_K27ac_287		chr1	12663850	12664378	SW_K27ac_287		chr1	7477665	7478248	SC_K27ac_287		chr1	9952704	9953468	HT1376_K27ac_287		chr1	6086515	6089186	T1_H3K27ac_1_287		chr17	80224316	80232297	T3_H3K27ac_287		chr19	8455164	8455697	T4_H3K27ac_287		chr17	74729427	74735027	T5_H3K27ac_287
	chr1	10317734	10318126	RT4_K27ac_288		chr1	12674846	12675084	SW_K27ac_288		chr1	7529602	7530204	SC_K27ac_288		chr1	9958334	9958804	HT1376_K27ac_288		chr1	6258895	6260278	T1_H3K27ac_1_288		chr6	35692334	35702094	T3_H3K27ac_288		chr5	131744578	131748879	T4_H3K27ac_288		chr3	49055389	49060466	T5_H3K27ac_288
	chr1	10323772	10324529	RT4_K27ac_289		chr1	12675298	12678335	SW_K27ac_289		chr1	7530751	7532020	SC_K27ac_289		chr1	9959138	9959467	HT1376_K27ac_289		chr1	6264872	6265392	T1_H3K27ac_1_289		chr18	72263241	72266288	T3_H3K27ac_289		chr2	30369722	30371343	T4_H3K27ac_289		chr4	169238131	169241664	T5_H3K27ac_289
	chr1	10352055	10352707	RT4_K27ac_290		chr1	12678465	12679777	SW_K27ac_290		chr1	7608904	7611176	SC_K27ac_290		chr1	9969232	9970305	HT1376_K27ac_290		chr1	6265556	6266322	T1_H3K27ac_1_290		chr13	48805158	48811494	T3_H3K27ac_290		chr17	73774497	73775970	T4_H3K27ac_290		chr5	114877707	114881065	T5_H3K27ac_290
	chr1	10447203	10449071	RT4_K27ac_291		chr1	14085881	14086223	SW_K27ac_291		chr1	7830995	7831216	SC_K27ac_291		chr1	9970733	9971456	HT1376_K27ac_291		chr1	6279905	6280201	T1_H3K27ac_1_291		chr4	40056939	40060107	T3_H3K27ac_291		chr8	98655181	98659126	T4_H3K27ac_291		chr17	73778450	73783689	T5_H3K27ac_291
	chr1	10458668	10459799	RT4_K27ac_292		chr1	14125623	14125934	SW_K27ac_292		chr1	7831292	7832088	SC_K27ac_292		chr1	10002608	10004109	HT1376_K27ac_292		chr1	6295552	6296002	T1_H3K27ac_1_292		chr19	18400637	18406195	T3_H3K27ac_292		chr16	89939045	89941310	T4_H3K27ac_292		chr14	71786297	71789980	T5_H3K27ac_292
	chr1	10474452	10475815	RT4_K27ac_293		chr1	14127318	14127556	SW_K27ac_293		chr1	7843294	7843791	SC_K27ac_293		chr1	10010151	10010494	HT1376_K27ac_293		chr1	6359899	6360389	T1_H3K27ac_1_293		chr10	38264217	38265980	T3_H3K27ac_293		chr4	89299736	89300729	T4_H3K27ac_293		chr22	36772155	36784059	T5_H3K27ac_293
	chr1	10476113	10476367	RT4_K27ac_294		chr1	15058936	15059138	SW_K27ac_294		chr1	7844382	7844972	SC_K27ac_294		chr1	10018525	10018879	HT1376_K27ac_294		chr1	6360919	6361095	T1_H3K27ac_1_294		chr1	1549576	1552310	T3_H3K27ac_294		chr17	71306063	71308937	T4_H3K27ac_294		chr6	151709320	151714691	T5_H3K27ac_294
	chr1	10490222	10491543	RT4_K27ac_295		chr1	15059396	15059650	SW_K27ac_295		chr1	8013698	8014790	SC_K27ac_295		chr1	10019102	10019426	HT1376_K27ac_295		chr1	6361357	6361694	T1_H3K27ac_1_295		chr16	28833374	28836447	T3_H3K27ac_295		chr1	1549901	1551943	T4_H3K27ac_295		chr2	64879299	64882201	T5_H3K27ac_295
	chr1	10518713	10519563	RT4_K27ac_296		chr1	15059865	15060524	SW_K27ac_296		chr1	8021118	8021503	SC_K27ac_296		chr1	10091990	10092650	HT1376_K27ac_296		chr1	6361859	6362735	T1_H3K27ac_1_296		chr7	158619565	158623378	T3_H3K27ac_296		chr17	1619827	1621754	T4_H3K27ac_296		chr6	36408423	36412608	T5_H3K27ac_296
	chr1	10519806	10520277	RT4_K27ac_297		chr1	15234055	15234489	SW_K27ac_297		chr1	8021731	8022603	SC_K27ac_297		chr1	10092984	10093956	HT1376_K27ac_297		chr1	6377253	6377554	T1_H3K27ac_1_297		chr11	206440	209669	T3_H3K27ac_297		chr19	39338531	39344052	T4_H3K27ac_297		chr20	44562608	44563837	T5_H3K27ac_297
	chr1	10531918	10532579	RT4_K27ac_298		chr1	15240049	15240332	SW_K27ac_298		chr1	8048253	8048667	SC_K27ac_298		chr1	10104060	10104403	HT1376_K27ac_298		chr1	6382439	6382642	T1_H3K27ac_1_298		chr4	24583783	24587051	T3_H3K27ac_298		chr5	137877494	137880503	T4_H3K27ac_298		chr1	100502572	100505845	T5_H3K27ac_298
	chr1	10534940	10535868	RT4_K27ac_299		chr1	15322984	15323552	SW_K27ac_299		chr1	8062431	8062803	SC_K27ac_299		chr1	10115396	10115904	HT1376_K27ac_299		chr1	6384919	6385642	T1_H3K27ac_1_299		chr10	30719620	30727584	T3_H3K27ac_299		chr19	8577534	8579518	T4_H3K27ac_299		chr5	138628637	138631599	T5_H3K27ac_299
	chr1	10536497	10537309	RT4_K27ac_300		chr1	15415625	15415899	SW_K27ac_300		chr1	8063960	8066548	SC_K27ac_300		chr1	10116157	10116403	HT1376_K27ac_300		chr1	6387739	6387904	T1_H3K27ac_1_300		chr6	90060472	90063563	T3_H3K27ac_300		chr17	42274846	42278719	T4_H3K27ac_300		chr20	39657348	39659867	T5_H3K27ac_300
	chr1	10555327	10556899	RT4_K27ac_301		chr1	15416572	15416901	SW_K27ac_301		chr1	8066636	8067466	SC_K27ac_301		chr1	10123214	10124020	HT1376_K27ac_301		chr1	6403955	6404376	T1_H3K27ac_1_301		chr3	41239955	41244641	T3_H3K27ac_301		chr12	6447848	6451872	T4_H3K27ac_301		chr8	59465145	59468299	T5_H3K27ac_301
	chr1	10570460	10571195	RT4_K27ac_302		chr1	15417213	15417585	SW_K27ac_302		chr1	8073150	8073434	SC_K27ac_302		chr1	10126347	10126981	HT1376_K27ac_302		chr1	6408803	6409326	T1_H3K27ac_1_302		chr11	66609531	66611999	T3_H3K27ac_302		chr1	200638259	200640082	T4_H3K27ac_302		chr6	11092867	11095511	T5_H3K27ac_302
	chr1	10575443	10575763	RT4_K27ac_303		chr1	15479095	15480967	SW_K27ac_303		chr1	8073645	8074084	SC_K27ac_303		chr1	10143579	10145626	HT1376_K27ac_303		chr1	6410173	6410397	T1_H3K27ac_1_303		chr17	7209663	7212952	T3_H3K27ac_303		chr19	52772721	52773940	T4_H3K27ac_303		chr7	39661257	39665633	T5_H3K27ac_303
	chr1	10576914	10577174	RT4_K27ac_304		chr1	15499253	15499607	SW_K27ac_304		chr1	8076059	8076644	SC_K27ac_304		chr1	10168076	10168503	HT1376_K27ac_304		chr1	6410758	6410930	T1_H3K27ac_1_304		chr10	106094859	106100614	T3_H3K27ac_304		chr18	3260496	3263558	T4_H3K27ac_304		chr1	226249158	226252214	T5_H3K27ac_304
	chr1	10577349	10577688	RT4_K27ac_305		chr1	15499765	15500029	SW_K27ac_305		chr1	8077632	8077917	SC_K27ac_305		chr1	10182668	10182920	HT1376_K27ac_305		chr1	6413786	6413951	T1_H3K27ac_1_305		chr9	110044577	110048527	T3_H3K27ac_305		chr7	100025252	100029272	T4_H3K27ac_305		chr13	43564412	43569007	T5_H3K27ac_305
	chr1	10637926	10638576	RT4_K27ac_306		chr1	15505858	15506065	SW_K27ac_306		chr1	8078149	8078512	SC_K27ac_306		chr1	10183101	10183484	HT1376_K27ac_306		chr1	6417362	6421300	T1_H3K27ac_1_306		chr6	3068052	3070358	T3_H3K27ac_306		chr10	38299237	38300353	T4_H3K27ac_306		chr17	60140794	60143395	T5_H3K27ac_306
	chr1	10638766	10639177	RT4_K27ac_307		chr1	15521506	15521809	SW_K27ac_307		chr1	8078607	8080287	SC_K27ac_307		chr1	10183636	10184122	HT1376_K27ac_307		chr1	6433823	6433988	T1_H3K27ac_1_307		chr2	74153099	74154912	T3_H3K27ac_307		chr1	153605683	153607029	T4_H3K27ac_307		chr17	27618375	27622108	T5_H3K27ac_307
	chr1	10645620	10646275	RT4_K27ac_308		chr1	15522192	15522714	SW_K27ac_308		chr1	8081760	8082095	SC_K27ac_308		chr1	10189353	10190180	HT1376_K27ac_308		chr1	6434194	6434519	T1_H3K27ac_1_308		chr14	90847344	90851888	T3_H3K27ac_308		chr17	41321297	41325003	T4_H3K27ac_308		chr17	7209452	7213171	T5_H3K27ac_308
	chr1	10651743	10651992	RT4_K27ac_309		chr1	15523382	15523604	SW_K27ac_309		chr1	8082456	8083086	SC_K27ac_309		chr1	10269831	10270429	HT1376_K27ac_309		chr1	6445993	6446330	T1_H3K27ac_1_309		chr5	65439357	65441366	T3_H3K27ac_309		chr7	23570082	23572234	T4_H3K27ac_309		chr4	40057021	40060244	T5_H3K27ac_309
	chr1	10658961	10660767	RT4_K27ac_310		chr1	15523745	15524395	SW_K27ac_310		chr1	8083311	8084345	SC_K27ac_310		chr1	10270599	10272208	HT1376_K27ac_310		chr1	6453216	6454552	T1_H3K27ac_1_310		chr12	10868101	10876624	T3_H3K27ac_310		chr1	37939229	37946593	T4_H3K27ac_310		chr19	47728919	47732455	T5_H3K27ac_310
	chr1	10694472	10696632	RT4_K27ac_311		chr1	15524816	15527144	SW_K27ac_311		chr1	8085044	8088693	SC_K27ac_311		chr1	10290918	10291179	HT1376_K27ac_311		chr1	6474393	6475110	T1_H3K27ac_1_311		chr3	30645437	30650681	T3_H3K27ac_311		chr17	29297583	29299835	T4_H3K27ac_311		chr13	48806738	48810008	T5_H3K27ac_311
	chr1	10703752	10704424	RT4_K27ac_312		chr1	15527339	15527660	SW_K27ac_312		chr1	8089149	8089414	SC_K27ac_312		chr1	10313050	10314118	HT1376_K27ac_312		chr1	6497615	6497789	T1_H3K27ac_1_312		chr5	148928150	148931785	T3_H3K27ac_312		chr11	3817266	3819965	T4_H3K27ac_312		chr17	34899458	34902833	T5_H3K27ac_312
	chr1	10728663	10729379	RT4_K27ac_313		chr1	15528054	15528891	SW_K27ac_313		chr1	8090571	8090793	SC_K27ac_313		chr1	10340355	10340711	HT1376_K27ac_313		chr1	6519592	6520532	T1_H3K27ac_1_313		chr2	38824280	38830672	T3_H3K27ac_313		chr17	78234625	78237296	T4_H3K27ac_313		chr2	149401679	149403860	T5_H3K27ac_313
	chr1	10753703	10754258	RT4_K27ac_314		chr1	15532430	15534200	SW_K27ac_314		chr1	8091087	8091316	SC_K27ac_314		chr1	10437359	10438832	HT1376_K27ac_314		chr1	6520777	6521927	T1_H3K27ac_1_314		chr14	39734665	39737389	T3_H3K27ac_314		chr8	101319253	101323717	T4_H3K27ac_314		chr2	47401066	47405070	T5_H3K27ac_314
	chr1	10758760	10760494	RT4_K27ac_315		chr1	15534629	15534939	SW_K27ac_315		chr1	8091679	8092132	SC_K27ac_315		chr1	10447594	10448146	HT1376_K27ac_315		chr1	6522206	6522587	T1_H3K27ac_1_315		chr1	59246318	59252698	T3_H3K27ac_315		chr19	19301542	19304110	T4_H3K27ac_315		chr18	46465170	46480211	T5_H3K27ac_315
	chr1	10764797	10765044	RT4_K27ac_316		chr1	15545327	15546036	SW_K27ac_316		chr1	8099800	8100845	SC_K27ac_316		chr1	10448450	10448920	HT1376_K27ac_316		chr1	6522805	6523097	T1_H3K27ac_1_316		chr16	31884319	31890580	T3_H3K27ac_316		chr3	101395172	101397396	T4_H3K27ac_316		chr19	35223944	35226095	T5_H3K27ac_316
	chr1	10784543	10784799	RT4_K27ac_317		chr1	15573757	15574220	SW_K27ac_317		chr1	8101099	8101544	SC_K27ac_317		chr1	10458469	10458821	HT1376_K27ac_317		chr1	6523346	6523743	T1_H3K27ac_1_317		chr17	7386443	7389003	T3_H3K27ac_317		chr17	74721148	74724152	T4_H3K27ac_317		chr2	54341977	54343483	T5_H3K27ac_317
	chr1	10797130	10797444	RT4_K27ac_318		chr1	15672584	15673001	SW_K27ac_318		chr1	8105589	8108809	SC_K27ac_318		chr1	10459029	10459686	HT1376_K27ac_318		chr1	6523937	6524906	T1_H3K27ac_1_318		chr20	32698753	32701015	T3_H3K27ac_318		chr4	186316726	186318413	T4_H3K27ac_318		chr14	31674873	31678577	T5_H3K27ac_318
	chr1	10803983	10804486	RT4_K27ac_319		chr1	15736019	15738730	SW_K27ac_319		chr1	8116477	8117160	SC_K27ac_319		chr1	10490436	10491650	HT1376_K27ac_319		chr1	6525101	6525266	T1_H3K27ac_1_319		chr2	220040594	220044174	T3_H3K27ac_319		chr1	113160094	113163677	T4_H3K27ac_319		chr6	2853280	2860358	T5_H3K27ac_319
	chr1	10804802	10806024	RT4_K27ac_320		chr1	15739119	15739943	SW_K27ac_320		chr1	8118242	8118730	SC_K27ac_320		chr1	10531940	10532642	HT1376_K27ac_320		chr1	6525593	6526686	T1_H3K27ac_1_320		chr8	144678350	144679944	T3_H3K27ac_320		chr3	5227627	5231281	T4_H3K27ac_320		chr16	31469305	31471179	T5_H3K27ac_320
	chr1	10821045	10822658	RT4_K27ac_321		chr1	15742555	15744070	SW_K27ac_321		chr1	8118798	8119267	SC_K27ac_321		chr1	10534534	10535823	HT1376_K27ac_321		chr1	6531301	6531566	T1_H3K27ac_1_321		chr1	59010198	59013119	T3_H3K27ac_321		chr22	39914692	39918149	T4_H3K27ac_321		chr12	4756986	4759231	T5_H3K27ac_321
	chr1	10839394	10840184	RT4_K27ac_322		chr1	15745613	15746230	SW_K27ac_322		chr1	8119381	8120535	SC_K27ac_322		chr1	10554917	10556820	HT1376_K27ac_322		chr1	6531750	6532177	T1_H3K27ac_1_322		chr13	50696422	50701616	T3_H3K27ac_322		chr9	33815980	33818997	T4_H3K27ac_322		chr19	59065010	59071624	T5_H3K27ac_322
	chr1	10853828	10854858	RT4_K27ac_323		chr1	15851053	15851438	SW_K27ac_323		chr1	8121200	8123280	SC_K27ac_323		chr1	10587881	10588872	HT1376_K27ac_323		chr1	6532456	6532723	T1_H3K27ac_1_323		chr13	99851358	99854261	T3_H3K27ac_323		chr2	88925549	88928552	T4_H3K27ac_323		chr6	30179957	30182734	T5_H3K27ac_323
	chr1	10855597	10856660	RT4_K27ac_324		chr1	15851712	15852473	SW_K27ac_324		chr1	8130542	8131123	SC_K27ac_324		chr1	10659011	10659813	HT1376_K27ac_324		chr1	6545197	6545611	T1_H3K27ac_1_324		chr3	19987726	19990002	T3_H3K27ac_324		chr6	159236982	159241007	T4_H3K27ac_324		chr6	88410029	88413213	T5_H3K27ac_324
	chr1	10863973	10865092	RT4_K27ac_325		chr1	15852650	15852981	SW_K27ac_325		chr1	8131270	8131487	SC_K27ac_325		chr1	10660119	10660475	HT1376_K27ac_325		chr1	6548983	6549897	T1_H3K27ac_1_325		chr5	137877144	137881336	T3_H3K27ac_325		chr16	89554769	89558005	T4_H3K27ac_325		chr14	35869796	35875191	T5_H3K27ac_325
	chr1	10880169	10880729	RT4_K27ac_326		chr1	15853278	15853772	SW_K27ac_326		chr1	8131549	8132302	SC_K27ac_326		chr1	10720872	10721397	HT1376_K27ac_326		chr1	6550093	6551779	T1_H3K27ac_1_326		chr8	103816701	103823150	T3_H3K27ac_326		chr13	52025259	52028859	T4_H3K27ac_326		chr3	56716142	56717779	T5_H3K27ac_326
	chr1	10927165	10927623	RT4_K27ac_327		chr1	15884787	15885036	SW_K27ac_327		chr1	8135908	8136152	SC_K27ac_327		chr1	10753896	10754256	HT1376_K27ac_327		chr1	6553052	6553372	T1_H3K27ac_1_327		chr8	145021618	145033173	T3_H3K27ac_327		chr19	50378683	50382110	T4_H3K27ac_327		chr6	41038987	41043158	T5_H3K27ac_327
	chr1	10950424	10951650	RT4_K27ac_328		chr1	15885264	15885785	SW_K27ac_328		chr1	8136216	8136772	SC_K27ac_328		chr1	10755079	10755573	HT1376_K27ac_328		chr1	6556935	6557317	T1_H3K27ac_1_328		chr5	108083038	108085630	T3_H3K27ac_328		chr8	103666500	103670487	T4_H3K27ac_328		chr19	18413271	18416759	T5_H3K27ac_328
	chr1	10960665	10961767	RT4_K27ac_329		chr1	15886243	15886871	SW_K27ac_329		chr1	8136847	8139104	SC_K27ac_329		chr1	10784452	10784900	HT1376_K27ac_329		chr1	6596451	6596616	T1_H3K27ac_1_329		chr2	201979580	201993147	T3_H3K27ac_329		chr8	53625754	53628583	T4_H3K27ac_329		chr2	206948997	206952082	T5_H3K27ac_329
	chr1	10980049	10980508	RT4_K27ac_330		chr1	15929581	15930071	SW_K27ac_330		chr1	8143549	8144036	SC_K27ac_330		chr1	10806449	10806825	HT1376_K27ac_330		chr1	6604984	6605666	T1_H3K27ac_1_330		chr17	76834797	76838531	T3_H3K27ac_330		chr7	129588277	129592894	T4_H3K27ac_330		chr2	198363077	198366737	T5_H3K27ac_330
	chr1	11072406	11073319	RT4_K27ac_331		chr1	15930228	15930484	SW_K27ac_331		chr1	8144141	8144697	SC_K27ac_331		chr1	10812705	10813039	HT1376_K27ac_331		chr1	6606558	6607128	T1_H3K27ac_1_331		chr1	207991769	208003185	T3_H3K27ac_331		chr17	34899603	34902768	T4_H3K27ac_331		chr11	72523609	72528009	T5_H3K27ac_331
	chr1	11085878	11086399	RT4_K27ac_332		chr1	15944011	15944681	SW_K27ac_332		chr1	8148092	8148503	SC_K27ac_332		chr1	10854579	10855301	HT1376_K27ac_332		chr1	6613282	6613447	T1_H3K27ac_1_332		chr18	5237028	5239139	T3_H3K27ac_332		chr3	176911313	176920240	T4_H3K27ac_332		chr10	27442440	27445819	T5_H3K27ac_332
	chr1	11119326	11120002	RT4_K27ac_333		chr1	15946122	15946362	SW_K27ac_333		chr1	8149506	8153424	SC_K27ac_333		chr1	10856248	10856657	HT1376_K27ac_333		chr1	6613793	6614023	T1_H3K27ac_1_333		chr19	47728391	47736594	T3_H3K27ac_333		chr2	43445166	43456581	T4_H3K27ac_333		chr7	44835508	44838072	T5_H3K27ac_333
	chr1	11120194	11120818	RT4_K27ac_334		chr1	16006788	16007210	SW_K27ac_334		chr1	8153632	8158389	SC_K27ac_334		chr1	10863826	10865072	HT1376_K27ac_334		chr1	6614242	6614583	T1_H3K27ac_1_334		chr6	28862988	28865556	T3_H3K27ac_334		chr12	125398197	125406760	T4_H3K27ac_334		chr8	67024812	67027445	T5_H3K27ac_334
	chr1	11159417	11160389	RT4_K27ac_335		chr1	16007444	16007638	SW_K27ac_335		chr1	8158560	8159215	SC_K27ac_335		chr1	10884795	10885405	HT1376_K27ac_335		chr1	6639501	6639834	T1_H3K27ac_1_335		chr7	66204096	66207136	T3_H3K27ac_335		chr20	42838267	42840518	T4_H3K27ac_335		chr10	3927566	3934474	T5_H3K27ac_335
	chr1	11322149	11322603	RT4_K27ac_336		chr1	16009623	16010812	SW_K27ac_336		chr1	8160604	8160956	SC_K27ac_336		chr1	10890457	10891866	HT1376_K27ac_336		chr1	6640092	6641441	T1_H3K27ac_1_336		chr19	35488425	35493104	T3_H3K27ac_336		chr10	32343996	32345860	T4_H3K27ac_336		chr2	55275472	55277637	T5_H3K27ac_336
	chr1	11327560	11327870	RT4_K27ac_337		chr1	16011007	16011592	SW_K27ac_337		chr1	8166932	8167394	SC_K27ac_337		chr1	10897587	10897821	HT1376_K27ac_337		chr1	6642109	6642485	T1_H3K27ac_1_337		chr17	74720972	74724580	T3_H3K27ac_337		chr14	24628441	24632510	T4_H3K27ac_337		chr11	85373998	85377188	T5_H3K27ac_337
	chr1	11333218	11334186	RT4_K27ac_338		chr1	16120309	16121025	SW_K27ac_338		chr1	8180422	8181940	SC_K27ac_338		chr1	10950356	10951873	HT1376_K27ac_338		chr1	6642676	6642911	T1_H3K27ac_1_338		chr15	81291552	81295011	T3_H3K27ac_338		chr17	62970901	62972911	T4_H3K27ac_338		chr14	35341230	35345627	T5_H3K27ac_338
	chr1	11376216	11377708	RT4_K27ac_339		chr1	16122176	16123423	SW_K27ac_339		chr1	8193130	8195709	SC_K27ac_339		chr1	10959736	10959961	HT1376_K27ac_339		chr1	6647699	6648064	T1_H3K27ac_1_339		chr14	102552018	102555200	T3_H3K27ac_339		chr4	6783854	6785815	T4_H3K27ac_339		chr3	185652158	185656636	T5_H3K27ac_339
	chr1	11538837	11539752	RT4_K27ac_340		chr1	16124280	16127652	SW_K27ac_340		chr1	8197153	8199072	SC_K27ac_340		chr1	10960114	10961958	HT1376_K27ac_340		chr1	6659113	6659842	T1_H3K27ac_1_340		chr10	120838648	120841189	T3_H3K27ac_340		chr10	103453297	103455098	T4_H3K27ac_340		chr9	132256357	132261091	T5_H3K27ac_340
	chr1	11623184	11624510	RT4_K27ac_341		chr1	16159697	16159934	SW_K27ac_341		chr1	8201275	8201890	SC_K27ac_341		chr1	11072387	11073427	HT1376_K27ac_341		chr1	6660185	6661215	T1_H3K27ac_1_341		chr2	25193379	25196705	T3_H3K27ac_341		chr2	196521173	196523646	T4_H3K27ac_341		chrX	153231881	153240641	T5_H3K27ac_341
	chr1	11628322	11628850	RT4_K27ac_342		chr1	16160959	16162283	SW_K27ac_342		chr1	8207876	8208274	SC_K27ac_342		chr1	11119324	11119989	HT1376_K27ac_342		chr1	6661604	6665239	T1_H3K27ac_1_342		chr1	32409018	32413106	T3_H3K27ac_342		chr22	30752205	30753137	T4_H3K27ac_342		chr1	41156951	41159140	T5_H3K27ac_342
	chr1	11629315	11630551	RT4_K27ac_343		chr1	16162573	16162897	SW_K27ac_343		chr1	8214577	8215163	SC_K27ac_343		chr1	11120256	11121144	HT1376_K27ac_343		chr1	6669370	6669963	T1_H3K27ac_1_343		chr1	22378683	22381238	T3_H3K27ac_343		chr2	26100276	26101762	T4_H3K27ac_343		chr12	112855847	112858042	T5_H3K27ac_343
	chr1	11714374	11714828	RT4_K27ac_344		chr1	16173627	16173975	SW_K27ac_344		chr1	8215420	8216253	SC_K27ac_344		chr1	11159266	11160259	HT1376_K27ac_344		chr1	6670392	6671234	T1_H3K27ac_1_344		chr1	228269242	228272120	T3_H3K27ac_344		chr19	42756828	42760250	T4_H3K27ac_344		chr3	135913192	135916632	T5_H3K27ac_344
	chr1	11714991	11715249	RT4_K27ac_345		chr1	16174289	16176392	SW_K27ac_345		chr1	8226144	8226378	SC_K27ac_345		chr1	11321895	11322625	HT1376_K27ac_345		chr1	6672562	6673573	T1_H3K27ac_1_345		chr19	14626944	14631719	T3_H3K27ac_345		chr6	32810176	32813687	T4_H3K27ac_345		chr10	121410053	121412952	T5_H3K27ac_345
	chr1	11724416	11724806	RT4_K27ac_346		chr1	16275707	16276118	SW_K27ac_346		chr1	8227272	8227479	SC_K27ac_346		chr1	11333230	11334055	HT1376_K27ac_346		chr1	6673853	6675721	T1_H3K27ac_1_346		chr5	65220235	65224262	T3_H3K27ac_346		chr1	115297990	115301279	T4_H3K27ac_346		chr11	129871111	129874665	T5_H3K27ac_346
	chr1	11740791	11741550	RT4_K27ac_347		chr1	16278755	16279306	SW_K27ac_347		chr1	8227903	8228565	SC_K27ac_347		chr1	11714235	11715499	HT1376_K27ac_347		chr1	6683125	6683506	T1_H3K27ac_1_347		chr5	96142347	96144685	T3_H3K27ac_347		chr17	80230187	80232077	T4_H3K27ac_347		chr1	17229967	17232294	T5_H3K27ac_347
	chr1	11796124	11797051	RT4_K27ac_348		chr1	16279714	16280243	SW_K27ac_348		chr1	8229110	8229944	SC_K27ac_348		chr1	11724676	11725005	HT1376_K27ac_348		chr1	6684933	6685785	T1_H3K27ac_1_348		chr6	26170112	26174293	T3_H3K27ac_348		chr13	31189829	31192937	T4_H3K27ac_348		chr17	57915243	57927636	T5_H3K27ac_348
	chr1	11849725	11850100	RT4_K27ac_349		chr1	16302255	16302599	SW_K27ac_349		chr1	8230124	8230718	SC_K27ac_349		chr1	11740575	11741558	HT1376_K27ac_349		chr1	6694447	6694775	T1_H3K27ac_1_349		chr6	76310305	76313072	T3_H3K27ac_349		chr1	154192143	154194880	T4_H3K27ac_349		chr20	43513688	43515742	T5_H3K27ac_349
	chr1	11865093	11866041	RT4_K27ac_350		chr1	16393449	16393686	SW_K27ac_350		chr1	8236795	8237169	SC_K27ac_350		chr1	11795410	11797098	HT1376_K27ac_350		chr1	6697436	6697892	T1_H3K27ac_1_350		chr22	29662959	29666637	T3_H3K27ac_350		chr19	58693443	58695484	T4_H3K27ac_350		chr1	169861413	169863951	T5_H3K27ac_350
	chr1	11866236	11866780	RT4_K27ac_351		chr1	16414423	16415566	SW_K27ac_351		chr1	8241050	8245407	SC_K27ac_351		chr1	11865142	11867010	HT1376_K27ac_351		chr1	6732365	6732530	T1_H3K27ac_1_351		chr11	118441968	118444709	T3_H3K27ac_351		chr10	112630467	112632901	T4_H3K27ac_351		chr3	48511052	48515370	T5_H3K27ac_351
	chr1	11880979	11881819	RT4_K27ac_352		chr1	16465495	16466171	SW_K27ac_352		chr1	8246039	8246279	SC_K27ac_352		chr1	11967906	11968295	HT1376_K27ac_352		chr1	6743145	6743310	T1_H3K27ac_1_352		chr17	4847415	4854638	T3_H3K27ac_352		chr5	114878717	114880569	T4_H3K27ac_352		chr4	54929151	54932474	T5_H3K27ac_352
	chr1	11967903	11968270	RT4_K27ac_353		chr1	16468050	16468558	SW_K27ac_353		chr1	8246749	8246983	SC_K27ac_353		chr1	11968482	11970218	HT1376_K27ac_353		chr1	6761157	6761907	T1_H3K27ac_1_353		chr7	151214996	151218201	T3_H3K27ac_353		chr17	48796251	48798404	T4_H3K27ac_353		chr1	212731244	212732867	T5_H3K27ac_353
	chr1	11968562	11969532	RT4_K27ac_354		chr1	16470110	16470436	SW_K27ac_354		chr1	8249591	8250279	SC_K27ac_354		chr1	11985598	11986291	HT1376_K27ac_354		chr1	6803596	6803992	T1_H3K27ac_1_354		chr17	27716797	27719020	T3_H3K27ac_354		chr9	74977135	74981154	T4_H3K27ac_354		chr9	110045434	110047995	T5_H3K27ac_354
	chr1	11969691	11970163	RT4_K27ac_355		chr1	16470627	16473612	SW_K27ac_355		chr1	8252442	8252775	SC_K27ac_355		chr1	11986604	11987019	HT1376_K27ac_355		chr1	6844122	6845068	T1_H3K27ac_1_355		chr16	20909971	20919392	T3_H3K27ac_355		chr22	42485497	42487595	T4_H3K27ac_355		chr6	138187134	138194575	T5_H3K27ac_355
	chr1	11985664	11986369	RT4_K27ac_356		chr1	16476964	16483086	SW_K27ac_356		chr1	8253916	8256112	SC_K27ac_356		chr1	11994145	11995195	HT1376_K27ac_356		chr1	6856230	6856569	T1_H3K27ac_1_356		chr16	71841364	71843938	T3_H3K27ac_356		chr5	137367581	137369462	T4_H3K27ac_356		chr1	228269067	228273475	T5_H3K27ac_356
	chr1	11986599	11986961	RT4_K27ac_357		chr1	16493788	16494549	SW_K27ac_357		chr1	8256226	8258635	SC_K27ac_357		chr1	12040175	12041856	HT1376_K27ac_357		chr1	6860126	6860308	T1_H3K27ac_1_357		chr20	52205121	52214340	T3_H3K27ac_357		chr20	23329856	23332477	T4_H3K27ac_357		chr6	7540661	7545104	T5_H3K27ac_357
	chr1	11994204	11995435	RT4_K27ac_358		chr1	16494805	16494990	SW_K27ac_358		chr1	8263912	8264753	SC_K27ac_358		chr1	12061213	12062682	HT1376_K27ac_358		chr1	6861218	6861549	T1_H3K27ac_1_358		chr3	105584060	105589270	T3_H3K27ac_358		chr17	26988424	26989964	T4_H3K27ac_358		chr3	122397497	122402354	T5_H3K27ac_358
	chr1	12040175	12041787	RT4_K27ac_359		chr1	16498096	16503517	SW_K27ac_359		chr1	8266313	8266488	SC_K27ac_359		chr1	12074384	12075461	HT1376_K27ac_359		chr1	6861997	6862661	T1_H3K27ac_1_359		chr3	49446948	49455771	T3_H3K27ac_359		chr19	2782509	2784054	T4_H3K27ac_359		chr12	7052068	7056739	T5_H3K27ac_359
	chr1	12049914	12051757	RT4_K27ac_360		chr1	16504873	16505276	SW_K27ac_360		chr1	8268316	8268529	SC_K27ac_360		chr1	12079546	12080090	HT1376_K27ac_360		chr1	6863698	6864079	T1_H3K27ac_1_360		chr2	46767980	46773192	T3_H3K27ac_360		chr7	86781190	86782882	T4_H3K27ac_360		chr6	290406	294485	T5_H3K27ac_360
	chr1	12079269	12080142	RT4_K27ac_361		chr1	16505434	16505856	SW_K27ac_361		chr1	8270420	8273893	SC_K27ac_361		chr1	12221636	12222006	HT1376_K27ac_361		chr1	6868199	6868520	T1_H3K27ac_1_361		chr15	74907080	74909568	T3_H3K27ac_361		chr19	14626961	14629331	T4_H3K27ac_361		chr11	47787173	47790647	T5_H3K27ac_361
	chr1	12203739	12204650	RT4_K27ac_362		chr1	16507275	16509684	SW_K27ac_362		chr1	8275372	8275888	SC_K27ac_362		chr1	12226796	12227301	HT1376_K27ac_362		chr1	6880330	6880495	T1_H3K27ac_1_362		chr2	61696024	61699896	T3_H3K27ac_362		chr1	151253282	151256110	T4_H3K27ac_362		chr1	198123870	198129273	T5_H3K27ac_362
	chr1	12221644	12222012	RT4_K27ac_363		chr1	16509869	16511297	SW_K27ac_363		chr1	8284566	8285796	SC_K27ac_363		chr1	12264214	12264403	HT1376_K27ac_363		chr1	6933496	6933661	T1_H3K27ac_1_363		chr1	151026988	151033195	T3_H3K27ac_363		chr11	693228	697394	T4_H3K27ac_363		chr20	17945350	17952729	T5_H3K27ac_363
	chr1	12226998	12227285	RT4_K27ac_364		chr1	16515774	16516240	SW_K27ac_364		chr1	8298348	8299114	SC_K27ac_364		chr1	12290086	12291529	HT1376_K27ac_364		chr1	6934173	6934432	T1_H3K27ac_1_364		chr7	139024202	139027994	T3_H3K27ac_364		chr1	78442819	78445897	T4_H3K27ac_364		chr20	4665652	4668744	T5_H3K27ac_364
	chr1	12244040	12244800	RT4_K27ac_365		chr1	16535211	16535517	SW_K27ac_365		chr1	8299224	8300185	SC_K27ac_365		chr1	12291724	12291942	HT1376_K27ac_365		chr1	7006372	7006677	T1_H3K27ac_1_365		chr20	34540902	34543230	T3_H3K27ac_365		chr5	180686852	180689791	T4_H3K27ac_365		chr17	27716915	27718941	T5_H3K27ac_365
	chr1	12266865	12267295	RT4_K27ac_366		chr1	16563360	16563645	SW_K27ac_366		chr1	8318449	8319956	SC_K27ac_366		chr1	12301494	12301712	HT1376_K27ac_366		chr1	7022997	7023192	T1_H3K27ac_1_366		chr8	123792329	123796177	T3_H3K27ac_366		chr7	27779079	27780891	T4_H3K27ac_366		chr1	173835961	173839146	T5_H3K27ac_366
	chr1	12290085	12291489	RT4_K27ac_367		chr1	16661690	16662008	SW_K27ac_367		chr1	8373931	8374212	SC_K27ac_367		chr1	12445975	12446342	HT1376_K27ac_367		chr1	7030472	7030637	T1_H3K27ac_1_367		chr3	81809207	81811929	T3_H3K27ac_367		chr12	25538014	25540449	T4_H3K27ac_367		chr2	197033487	197036350	T5_H3K27ac_367
	chr1	12440466	12441097	RT4_K27ac_368		chr1	16675710	16675891	SW_K27ac_368		chr1	8403015	8404333	SC_K27ac_368		chr1	12540853	12541296	HT1376_K27ac_368		chr1	7177777	7178002	T1_H3K27ac_1_368		chr14	21734935	21738947	T3_H3K27ac_368		chr8	145024756	145027863	T4_H3K27ac_368		chr11	128384979	128395422	T5_H3K27ac_368
	chr1	12441391	12441983	RT4_K27ac_369		chr1	16678177	16678949	SW_K27ac_369		chr1	8454474	8454893	SC_K27ac_369		chr1	12609369	12609783	HT1376_K27ac_369		chr1	7359720	7360024	T1_H3K27ac_1_369		chr11	11862537	11866220	T3_H3K27ac_369		chr16	71927790	71930807	T4_H3K27ac_369		chr6	30582888	30586479	T5_H3K27ac_369
	chr1	12442135	12442463	RT4_K27ac_370		chr1	16679132	16679657	SW_K27ac_370		chr1	8455262	8455987	SC_K27ac_370		chr1	12678007	12679599	HT1376_K27ac_370		chr1	7360324	7360717	T1_H3K27ac_1_370		chr15	41407435	41409688	T3_H3K27ac_370		chr15	44954168	44955915	T4_H3K27ac_370		chr22	31681305	31690379	T5_H3K27ac_370
	chr1	12445992	12446297	RT4_K27ac_371		chr1	16693731	16694784	SW_K27ac_371		chr1	8456382	8456679	SC_K27ac_371		chr1	12771197	12771438	HT1376_K27ac_371		chr1	7373129	7373294	T1_H3K27ac_1_371		chr7	143075511	143082381	T3_H3K27ac_371		chr19	14115411	14118261	T4_H3K27ac_371		chr2	191882484	191888393	T5_H3K27ac_371
	chr1	12446556	12447276	RT4_K27ac_372		chr1	16767279	16767710	SW_K27ac_372		chr1	8456807	8457181	SC_K27ac_372		chr1	12771713	12772511	HT1376_K27ac_372		chr1	7449216	7449635	T1_H3K27ac_1_372		chr1	172500954	172504141	T3_H3K27ac_372		chr17	41436689	41440167	T4_H3K27ac_372		chr5	39072557	39075855	T5_H3K27ac_372
	chr1	12483540	12483852	RT4_K27ac_373		chr1	16928579	16928877	SW_K27ac_373		chr1	8457407	8458004	SC_K27ac_373		chr1	12773019	12773768	HT1376_K27ac_373		chr1	7530578	7530971	T1_H3K27ac_1_373		chr10	69833774	69835633	T3_H3K27ac_373		chr1	157107083	157109194	T4_H3K27ac_373		chr1	185124766	185127355	T5_H3K27ac_373
	chr1	12494283	12494699	RT4_K27ac_374		chr1	16929090	16929396	SW_K27ac_374		chr1	8482755	8483782	SC_K27ac_374		chr1	12773972	12774391	HT1376_K27ac_374		chr1	7531146	7531706	T1_H3K27ac_1_374		chr14	39570976	39573667	T3_H3K27ac_374		chr22	24128539	24130188	T4_H3K27ac_374		chr17	62969992	62972842	T5_H3K27ac_374
	chr1	12495814	12497052	RT4_K27ac_375		chr1	16939832	16940050	SW_K27ac_375		chr1	8483945	8484958	SC_K27ac_375		chr1	12796487	12796746	HT1376_K27ac_375		chr1	7550949	7551360	T1_H3K27ac_1_375		chr14	55031164	55037568	T3_H3K27ac_375		chr5	77070986	77072369	T4_H3K27ac_375		chr22	41839901	41844950	T5_H3K27ac_375
	chr1	12497226	12497622	RT4_K27ac_376		chr1	16970651	16971624	SW_K27ac_376		chr1	8554303	8555232	SC_K27ac_376		chr1	14075266	14076703	HT1376_K27ac_376		chr1	7555833	7556050	T1_H3K27ac_1_376		chr17	38803359	38805510	T3_H3K27ac_376		chr18	33708406	33710381	T4_H3K27ac_376		chr2	30369551	30371430	T5_H3K27ac_376
	chr1	12508555	12509207	RT4_K27ac_377		chr1	17215503	17216145	SW_K27ac_377		chr1	8556275	8557657	SC_K27ac_377		chr1	14084585	14085028	HT1376_K27ac_377		chr1	7609167	7610037	T1_H3K27ac_1_377		chr14	60714044	60717241	T3_H3K27ac_377		chr2	219080717	219085161	T4_H3K27ac_377		chr3	73045419	73047199	T5_H3K27ac_377
	chr1	12513431	12513820	RT4_K27ac_378		chr1	17222178	17222484	SW_K27ac_378		chr1	8558112	8558662	SC_K27ac_378		chr1	14085759	14086382	HT1376_K27ac_378		chr1	7632741	7632983	T1_H3K27ac_1_378		chr21	34774383	34778646	T3_H3K27ac_378		chr8	52809904	52811685	T4_H3K27ac_378		chr7	23569755	23572718	T5_H3K27ac_378
	chr1	12514692	12514922	RT4_K27ac_379		chr1	17230760	17231748	SW_K27ac_379		chr1	8577245	8577447	SC_K27ac_379		chr1	14100971	14101617	HT1376_K27ac_379		chr1	7740503	7740773	T1_H3K27ac_1_379		chr20	44562311	44564758	T3_H3K27ac_379		chr22	41808065	41811402	T4_H3K27ac_379		chr20	32399050	32401140	T5_H3K27ac_379
	chr1	12535235	12535829	RT4_K27ac_380		chr1	17251906	17252209	SW_K27ac_380		chr1	8583794	8584175	SC_K27ac_380		chr1	14127000	14127762	HT1376_K27ac_380		chr1	7764728	7764998	T1_H3K27ac_1_380		chr12	12875186	12879983	T3_H3K27ac_380		chr2	26255488	26258420	T4_H3K27ac_380		chr15	31616785	31618696	T5_H3K27ac_380
	chr1	12536056	12536554	RT4_K27ac_381		chr1	17379954	17380514	SW_K27ac_381		chr1	8584742	8585058	SC_K27ac_381		chr1	15059295	15060402	HT1376_K27ac_381		chr1	7820217	7820382	T1_H3K27ac_1_381		chr1	200707247	200709328	T3_H3K27ac_381		chr2	135674771	135677227	T4_H3K27ac_381		chr2	86789210	86791031	T5_H3K27ac_381
	chr1	12537886	12538388	RT4_K27ac_382		chr1	17455197	17455759	SW_K27ac_382		chr1	8585182	8586045	SC_K27ac_382		chr1	15069115	15069369	HT1376_K27ac_382		chr1	7830916	7832061	T1_H3K27ac_1_382		chr17	41853611	41856962	T3_H3K27ac_382		chr14	75641873	75643907	T4_H3K27ac_382		chr17	80230135	80232137	T5_H3K27ac_382
	chr1	12538583	12539435	RT4_K27ac_383		chr1	17494502	17495064	SW_K27ac_383		chr1	8599489	8600735	SC_K27ac_383		chr1	15225994	15226373	HT1376_K27ac_383		chr1	7842944	7843401	T1_H3K27ac_1_383		chr11	354717	356451	T3_H3K27ac_383		chr1	149856164	149860738	T4_H3K27ac_383		chr2	174826833	174831513	T5_H3K27ac_383
	chr1	12540994	12541461	RT4_K27ac_384		chr1	17516747	17517519	SW_K27ac_384		chr1	8601005	8601621	SC_K27ac_384		chr1	15236937	15237975	HT1376_K27ac_384		chr1	7844036	7844547	T1_H3K27ac_1_384		chr1	183601789	183605699	T3_H3K27ac_384		chr1	156715483	156722491	T4_H3K27ac_384		chr17	36855674	36863436	T5_H3K27ac_384
	chr1	12587754	12589832	RT4_K27ac_385		chr1	17526976	17529011	SW_K27ac_385		chr1	8602016	8602551	SC_K27ac_385		chr1	15239530	15240281	HT1376_K27ac_385		chr1	7903207	7903392	T1_H3K27ac_1_385		chr9	33287297	33293818	T3_H3K27ac_385		chr22	39101876	39103908	T4_H3K27ac_385		chr14	24739938	24741585	T5_H3K27ac_385
	chr1	12609356	12610631	RT4_K27ac_386		chr1	17530681	17531102	SW_K27ac_386		chr1	8602619	8602896	SC_K27ac_386		chr1	15251128	15251599	HT1376_K27ac_386		chr1	7990087	7990377	T1_H3K27ac_1_386		chr17	33567178	33573003	T3_H3K27ac_386		chr3	187085356	187087921	T4_H3K27ac_386		chr16	11344797	11351709	T5_H3K27ac_386
	chr1	12632713	12633386	RT4_K27ac_387		chr1	17531337	17533106	SW_K27ac_387		chr1	8604813	8605045	SC_K27ac_387		chr1	15266252	15266579	HT1376_K27ac_387		chr1	7990534	7990699	T1_H3K27ac_1_387		chr8	48645372	48652045	T3_H3K27ac_387		chr6	74228382	74234198	T4_H3K27ac_387		chr3	151983571	151989712	T5_H3K27ac_387
	chr1	12676246	12677630	RT4_K27ac_388		chr1	17533243	17535490	SW_K27ac_388		chr1	8614842	8615336	SC_K27ac_388		chr1	15271599	15272790	HT1376_K27ac_388		chr1	8000877	8001042	T1_H3K27ac_1_388		chr19	39341231	39344059	T3_H3K27ac_388		chr16	81478572	81482754	T4_H3K27ac_388		chr12	100534766	100537203	T5_H3K27ac_388
	chr1	12677982	12678312	RT4_K27ac_389		chr1	17535603	17535791	SW_K27ac_389		chr1	8720987	8722883	SC_K27ac_389		chr1	15294890	15295340	HT1376_K27ac_389		chr1	8002181	8002477	T1_H3K27ac_1_389		chr2	162016197	162018133	T3_H3K27ac_389		chr8	125485897	125488586	T4_H3K27ac_389		chr11	10829043	10831853	T5_H3K27ac_389
	chr1	12678485	12679648	RT4_K27ac_390		chr1	17536691	17537567	SW_K27ac_390		chr1	8740579	8740841	SC_K27ac_390		chr1	15296950	15297487	HT1376_K27ac_390		chr1	8013897	8014734	T1_H3K27ac_1_390		chr11	67350366	67353038	T3_H3K27ac_390		chr20	30697176	30699036	T4_H3K27ac_390		chr1	153504860	153509507	T5_H3K27ac_390
	chr1	12767711	12768356	RT4_K27ac_391		chr1	17538111	17538726	SW_K27ac_391		chr1	8740906	8741220	SC_K27ac_391		chr1	15322938	15323607	HT1376_K27ac_391		chr1	8021131	8022361	T1_H3K27ac_1_391		chr20	23341347	23344285	T3_H3K27ac_391		chr3	156805927	156808808	T4_H3K27ac_391		chr17	78234569	78239377	T5_H3K27ac_391
	chr1	12768532	12769699	RT4_K27ac_392		chr1	17540730	17543054	SW_K27ac_392		chr1	8762865	8763322	SC_K27ac_392		chr1	15346834	15347345	HT1376_K27ac_392		chr1	8064823	8065429	T1_H3K27ac_1_392		chr1	179849707	179853452	T3_H3K27ac_392		chr11	64544938	64547769	T4_H3K27ac_392		chr17	7386439	7388842	T5_H3K27ac_392
	chr1	14026267	14027159	RT4_K27ac_393		chr1	17554984	17556954	SW_K27ac_393		chr1	8772182	8773153	SC_K27ac_393		chr1	15347984	15348424	HT1376_K27ac_393		chr1	8065696	8066660	T1_H3K27ac_1_393		chr17	7120839	7125465	T3_H3K27ac_393		chr2	27650801	27652626	T4_H3K27ac_393		chr1	203273104	203277130	T5_H3K27ac_393
	chr1	14075307	14076699	RT4_K27ac_394		chr1	17558715	17560429	SW_K27ac_394		chr1	8876569	8877795	SC_K27ac_394		chr1	15354179	15354833	HT1376_K27ac_394		chr1	8066904	8067281	T1_H3K27ac_1_394		chr6	134495299	134498284	T3_H3K27ac_394		chr4	15656032	15657919	T4_H3K27ac_394		chr22	29662993	29665428	T5_H3K27ac_394
	chr1	14084494	14084923	RT4_K27ac_395		chr1	17560541	17561159	SW_K27ac_395		chr1	8877860	8878720	SC_K27ac_395		chr1	15466335	15466659	HT1376_K27ac_395		chr1	8068652	8069063	T1_H3K27ac_1_395		chr1	24304368	24307555	T3_H3K27ac_395		chr7	66146083	66147998	T4_H3K27ac_395		chr4	83292962	83296670	T5_H3K27ac_395
	chr1	14085771	14086306	RT4_K27ac_396		chr1	17561794	17562391	SW_K27ac_396		chr1	8882484	8882919	SC_K27ac_396		chr1	15479158	15481122	HT1376_K27ac_396		chr1	8075334	8075733	T1_H3K27ac_1_396		chr19	56145705	56148547	T3_H3K27ac_396		chr9	132175018	132177711	T4_H3K27ac_396		chr2	219258866	219266539	T5_H3K27ac_396
	chr1	14087862	14088144	RT4_K27ac_397		chr1	17572223	17572406	SW_K27ac_397		chr1	8883017	8883263	SC_K27ac_397		chr1	15498927	15500079	HT1376_K27ac_397		chr1	8076007	8076172	T1_H3K27ac_1_397		chr9	132240730	132255208	T3_H3K27ac_397		chr13	49548982	49551906	T4_H3K27ac_397		chr9	115140801	115143291	T5_H3K27ac_397
	chr1	14125543	14126165	RT4_K27ac_398		chr1	17630339	17630656	SW_K27ac_398		chr1	8931560	8931840	SC_K27ac_398		chr1	15515832	15516770	HT1376_K27ac_398		chr1	8077727	8077893	T1_H3K27ac_1_398		chr19	39338331	39340922	T3_H3K27ac_398		chr15	81292030	81294793	T4_H3K27ac_398		chr10	91173097	91175873	T5_H3K27ac_398
	chr1	14126318	14127734	RT4_K27ac_399		chr1	17630841	17631318	SW_K27ac_399		chr1	8932733	8933824	SC_K27ac_399		chr1	15526093	15527689	HT1376_K27ac_399		chr1	8078158	8078323	T1_H3K27ac_1_399		chr2	232573204	232577715	T3_H3K27ac_399		chr4	77995448	77998326	T4_H3K27ac_399		chr2	208392790	208397215	T5_H3K27ac_399
	chr1	14155577	14155895	RT4_K27ac_400		chr1	17764606	17766162	SW_K27ac_400		chr1	8934024	8934334	SC_K27ac_400		chr1	15532485	15534064	HT1376_K27ac_400		chr1	8079986	8080152	T1_H3K27ac_1_400		chr7	32534335	32536079	T3_H3K27ac_400		chr3	122398071	122401963	T4_H3K27ac_400		chr22	41487688	41489561	T5_H3K27ac_400
	chr1	14391081	14391966	RT4_K27ac_401		chr1	17766387	17768030	SW_K27ac_401		chr1	8936142	8936375	SC_K27ac_401		chr1	15545203	15546042	HT1376_K27ac_401		chr1	8080621	8080941	T1_H3K27ac_1_401		chr11	34071964	34076178	T3_H3K27ac_401		chr5	131821242	131828169	T4_H3K27ac_401		chr2	9693250	9697274	T5_H3K27ac_401
	chr1	14979680	14980304	RT4_K27ac_402		chr1	17768841	17769300	SW_K27ac_402		chr1	8936452	8941028	SC_K27ac_402		chr1	15573720	15574295	HT1376_K27ac_402		chr1	8083482	8083928	T1_H3K27ac_1_402		chr22	42473044	42477103	T3_H3K27ac_402		chr2	55275042	55278977	T4_H3K27ac_402		chr4	78738515	78744115	T5_H3K27ac_402
	chr1	15058833	15060685	RT4_K27ac_403		chr1	17769446	17769744	SW_K27ac_403		chr1	8950065	8951061	SC_K27ac_403		chr1	15672079	15672860	HT1376_K27ac_403		chr1	8085424	8086258	T1_H3K27ac_1_403		chr17	56063611	56066585	T3_H3K27ac_403		chr16	9185430	9187307	T4_H3K27ac_403		chr6	157340845	157343724	T5_H3K27ac_403
	chr1	15207030	15208739	RT4_K27ac_404		chr1	17846862	17847184	SW_K27ac_404		chr1	8959281	8960047	SC_K27ac_404		chr1	15679233	15679620	HT1376_K27ac_404		chr1	8086440	8087589	T1_H3K27ac_1_404		chr22	41839269	41844531	T3_H3K27ac_404		chr2	149401805	149403715	T4_H3K27ac_404		chr3	142163890	142167737	T5_H3K27ac_404
	chr1	15233370	15234654	RT4_K27ac_405		chr1	17865850	17866113	SW_K27ac_405		chr1	8960162	8960714	SC_K27ac_405		chr1	15726728	15727250	HT1376_K27ac_405		chr1	8088065	8088522	T1_H3K27ac_1_405		chr1	24967840	24969525	T3_H3K27ac_405		chr17	33568475	33572155	T4_H3K27ac_405		chr1	28995557	28997009	T5_H3K27ac_405
	chr1	15239910	15241009	RT4_K27ac_406		chr1	17866374	17867220	SW_K27ac_406		chr1	8963589	8963996	SC_K27ac_406		chr1	15727514	15727963	HT1376_K27ac_406		chr1	8105863	8106435	T1_H3K27ac_1_406		chr8	1711900	1713993	T3_H3K27ac_406		chr19	17621402	17623765	T4_H3K27ac_406		chr3	113461684	113468662	T5_H3K27ac_406
	chr1	15271961	15272704	RT4_K27ac_407		chr1	17867421	17867653	SW_K27ac_407		chr1	8971526	8971823	SC_K27ac_407		chr1	15735670	15737173	HT1376_K27ac_407		chr1	8106598	8106883	T1_H3K27ac_1_407		chr1	200637813	200640754	T3_H3K27ac_407		chr5	90675078	90680737	T4_H3K27ac_407		chr14	100838442	100843811	T5_H3K27ac_407
	chr1	15415332	15415980	RT4_K27ac_408		chr1	17871785	17871965	SW_K27ac_408		chr1	8971910	8972224	SC_K27ac_408		chr1	15742260	15742962	HT1376_K27ac_408		chr1	8107194	8107454	T1_H3K27ac_1_408		chr17	57912207	57921855	T3_H3K27ac_408		chr6	47444896	47447248	T4_H3K27ac_408		chr9	130328368	130333859	T5_H3K27ac_408
	chr1	15416661	15417473	RT4_K27ac_409		chr1	17877944	17878763	SW_K27ac_409		chr1	9001295	9001879	SC_K27ac_409		chr1	15756290	15756534	HT1376_K27ac_409		chr1	8108381	8108550	T1_H3K27ac_1_409		chr10	81958918	81968609	T3_H3K27ac_409		chr3	130611978	130613941	T4_H3K27ac_409		chr14	103850562	103854098	T5_H3K27ac_409
	chr1	15479081	15480902	RT4_K27ac_410		chr1	17879400	17880421	SW_K27ac_410		chr1	9002175	9002683	SC_K27ac_410		chr1	15851129	15851355	HT1376_K27ac_410		chr1	8119463	8119822	T1_H3K27ac_1_410		chr20	48805676	48812145	T3_H3K27ac_410		chr16	19078326	19079961	T4_H3K27ac_410		chr2	43036390	43039200	T5_H3K27ac_410
	chr1	15492905	15493132	RT4_K27ac_411		chr1	17880712	17881633	SW_K27ac_411		chr1	9033436	9033722	SC_K27ac_411		chr1	15851735	15853030	HT1376_K27ac_411		chr1	8120838	8121457	T1_H3K27ac_1_411		chr14	31493997	31496902	T3_H3K27ac_411		chr19	39388893	39391494	T4_H3K27ac_411		chr3	169897902	169900024	T5_H3K27ac_411
	chr1	15498264	15499615	RT4_K27ac_412		chr1	17884883	17889731	SW_K27ac_412		chr1	9034341	9034763	SC_K27ac_412		chr1	15853268	15853957	HT1376_K27ac_412		chr1	8121713	8122165	T1_H3K27ac_1_412		chr22	30817899	30823275	T3_H3K27ac_412		chr19	40930408	40931923	T4_H3K27ac_412		chr6	35463257	35466821	T5_H3K27ac_412
	chr1	15499787	15500062	RT4_K27ac_413		chr1	17891906	17892138	SW_K27ac_413		chr1	9046039	9046536	SC_K27ac_413		chr1	15859666	15859966	HT1376_K27ac_413		chr1	8122332	8122727	T1_H3K27ac_1_413		chr11	129870458	129874661	T3_H3K27ac_413		chr3	141593277	141597988	T4_H3K27ac_413		chr18	29671424	29673962	T5_H3K27ac_413
	chr1	15504903	15506003	RT4_K27ac_414		chr1	17894931	17897600	SW_K27ac_414		chr1	9144836	9145197	SC_K27ac_414		chr1	15904218	15904451	HT1376_K27ac_414		chr1	8130575	8130940	T1_H3K27ac_1_414		chr3	40350609	40352750	T3_H3K27ac_414		chr6	137536724	137541949	T4_H3K27ac_414		chr18	2653760	2658790	T5_H3K27ac_414
	chr1	15513986	15514316	RT4_K27ac_415		chr1	17899004	17899203	SW_K27ac_415		chr1	9170355	9170874	SC_K27ac_415		chr1	15929528	15930661	HT1376_K27ac_415		chr1	8134876	8135105	T1_H3K27ac_1_415		chr2	30369745	30371158	T3_H3K27ac_415		chr10	30721540	30725962	T4_H3K27ac_415		chr6	2874062	2878812	T5_H3K27ac_415
	chr1	15523496	15524207	RT4_K27ac_416		chr1	17906305	17906764	SW_K27ac_416		chr1	9187927	9189145	SC_K27ac_416		chr1	15943238	15943647	HT1376_K27ac_416		chr1	8137190	8139070	T1_H3K27ac_1_416		chr1	68150867	68153585	T3_H3K27ac_416		chr20	388662	391176	T4_H3K27ac_416		chr1	67395225	67397773	T5_H3K27ac_416
	chr1	15525408	15527099	RT4_K27ac_417		chr1	17913807	17914094	SW_K27ac_417		chr1	9189330	9189965	SC_K27ac_417		chr1	15943997	15944714	HT1376_K27ac_417		chr1	8139231	8139424	T1_H3K27ac_1_417		chr19	18413603	18418317	T3_H3K27ac_417		chrX	110924193	110925363	T4_H3K27ac_417		chr13	20531321	20534428	T5_H3K27ac_417
	chr1	15527343	15527678	RT4_K27ac_418		chr1	17914422	17915043	SW_K27ac_418		chr1	9205200	9205478	SC_K27ac_418		chr1	15944887	15945187	HT1376_K27ac_418		chr1	8143732	8143905	T1_H3K27ac_1_418		chr15	59979628	59982554	T3_H3K27ac_418		chr19	2059567	2062577	T4_H3K27ac_418		chr7	86780847	86783037	T5_H3K27ac_418
	chr1	15528083	15528884	RT4_K27ac_419		chr1	17950640	17951171	SW_K27ac_419		chr1	9211076	9211277	SC_K27ac_419		chr1	15945613	15946528	HT1376_K27ac_419		chr1	8144202	8144567	T1_H3K27ac_1_419		chr2	219146064	219161220	T3_H3K27ac_419		chr3	48513231	48515335	T4_H3K27ac_419		chr19	797253	800418	T5_H3K27ac_419
	chr1	15532761	15534304	RT4_K27ac_420		chr1	18767534	18767929	SW_K27ac_420		chr1	9211679	9212162	SC_K27ac_420		chr1	15968109	15968369	HT1376_K27ac_420		chr1	8149665	8149888	T1_H3K27ac_1_420		chr7	5567375	5573609	T3_H3K27ac_420		chr6	31165047	31167543	T4_H3K27ac_420		chr19	1268876	1271434	T5_H3K27ac_420
	chr1	15534535	15535065	RT4_K27ac_421		chr1	18790642	18790843	SW_K27ac_421		chr1	9222467	9222950	SC_K27ac_421		chr1	15983010	15984101	HT1376_K27ac_421		chr1	8150610	8151064	T1_H3K27ac_1_421		chr8	141520053	141523479	T3_H3K27ac_421		chrX	24166542	24170027	T4_H3K27ac_421		chr10	69833293	69835952	T5_H3K27ac_421
	chr1	15555690	15556240	RT4_K27ac_422		chr1	18791072	18791311	SW_K27ac_422		chr1	9223129	9224060	SC_K27ac_422		chr1	16006372	16007701	HT1376_K27ac_422		chr1	8154707	8155132	T1_H3K27ac_1_422		chr19	14112534	14118338	T3_H3K27ac_422		chr8	61428864	61431103	T4_H3K27ac_422		chr6	74362671	74365450	T5_H3K27ac_422
	chr1	15556581	15556874	RT4_K27ac_423		chr1	18807105	18807358	SW_K27ac_423		chr1	9241770	9243097	SC_K27ac_423		chr1	16007869	16008940	HT1376_K27ac_423		chr1	8155821	8156620	T1_H3K27ac_1_423		chr1	244996014	245001182	T3_H3K27ac_423		chr4	83293672	83296870	T4_H3K27ac_423		chr16	69597377	69602049	T5_H3K27ac_423
	chr1	15573571	15574219	RT4_K27ac_424		chr1	18807631	18808201	SW_K27ac_424		chr1	9288385	9288644	SC_K27ac_424		chr1	16010159	16010794	HT1376_K27ac_424		chr1	8156879	8157044	T1_H3K27ac_1_424		chr5	56467672	56472966	T3_H3K27ac_424		chr12	65562496	65565044	T4_H3K27ac_424		chr13	111564226	111569258	T5_H3K27ac_424
	chr1	15610644	15612272	RT4_K27ac_425		chr1	18993367	18993918	SW_K27ac_425		chr1	9289065	9289475	SC_K27ac_425		chr1	16023806	16024069	HT1376_K27ac_425		chr1	8157228	8157559	T1_H3K27ac_1_425		chr1	182990671	182994487	T3_H3K27ac_425		chr1	182990840	182993687	T4_H3K27ac_425		chr19	18389972	18392395	T5_H3K27ac_425
	chr1	15667786	15668522	RT4_K27ac_426		chr1	18994287	18994714	SW_K27ac_426		chr1	9291891	9292241	SC_K27ac_426		chr1	16029410	16029766	HT1376_K27ac_426		chr1	8157985	8158302	T1_H3K27ac_1_426		chr11	85373873	85376499	T3_H3K27ac_426		chr17	27716884	27718634	T4_H3K27ac_426		chr1	151960396	151968076	T5_H3K27ac_426
	chr1	15668766	15669103	RT4_K27ac_427		chr1	18994884	18995185	SW_K27ac_427		chr1	9294099	9294678	SC_K27ac_427		chr1	16049228	16049777	HT1376_K27ac_427		chr1	8180368	8181928	T1_H3K27ac_1_427		chr3	150262213	150265620	T3_H3K27ac_427		chr5	42990267	42996001	T4_H3K27ac_427		chr2	70474561	70476606	T5_H3K27ac_427
	chr1	15678706	15679582	RT4_K27ac_428		chr1	18995531	18996230	SW_K27ac_428		chr1	9294807	9295889	SC_K27ac_428		chr1	16114889	16115787	HT1376_K27ac_428		chr1	8182636	8182969	T1_H3K27ac_1_428		chr17	66243143	66246327	T3_H3K27ac_428		chr17	56407797	56418343	T4_H3K27ac_428		chr11	94799608	94801992	T5_H3K27ac_428
	chr1	15726562	15727938	RT4_K27ac_429		chr1	18996923	18997255	SW_K27ac_429		chr1	9326871	9327255	SC_K27ac_429		chr1	16121992	16122501	HT1376_K27ac_429		chr1	8193201	8193514	T1_H3K27ac_1_429		chr6	33279350	33284326	T3_H3K27ac_429		chr4	69214013	69216372	T4_H3K27ac_429		chr2	157290945	157294450	T5_H3K27ac_429
	chr1	15736048	15737178	RT4_K27ac_430		chr1	19228766	19229334	SW_K27ac_430		chr1	9339519	9340444	SC_K27ac_430		chr1	16125227	16125593	HT1376_K27ac_430		chr1	8194621	8194927	T1_H3K27ac_1_430		chr7	66459335	66460695	T3_H3K27ac_430		chr7	75986653	75989410	T4_H3K27ac_430		chr10	105879222	105881675	T5_H3K27ac_430
	chr1	15742211	15744464	RT4_K27ac_431		chr1	19229520	19229719	SW_K27ac_431		chr1	9340595	9341359	SC_K27ac_431		chr1	16125849	16126699	HT1376_K27ac_431		chr1	8212098	8212577	T1_H3K27ac_1_431		chr13	98085548	98087673	T3_H3K27ac_431		chr14	73602664	73604379	T4_H3K27ac_431		chr17	73177193	73180054	T5_H3K27ac_431
	chr1	15750163	15751580	RT4_K27ac_432		chr1	19248915	19249535	SW_K27ac_432		chr1	9342804	9343059	SC_K27ac_432		chr1	16126890	16127783	HT1376_K27ac_432		chr1	8212887	8213584	T1_H3K27ac_1_432		chr18	2570119	2572124	T3_H3K27ac_432		chr13	111364003	111367710	T4_H3K27ac_432		chr9	33288801	33292262	T5_H3K27ac_432
	chr1	15755865	15756355	RT4_K27ac_433		chr1	19253395	19254036	SW_K27ac_433		chr1	9349724	9351243	SC_K27ac_433		chr1	16135118	16136572	HT1376_K27ac_433		chr1	8229306	8229886	T1_H3K27ac_1_433		chr14	75739463	75748542	T3_H3K27ac_433		chr2	74684166	74685333	T4_H3K27ac_433		chr6	127587302	127589993	T5_H3K27ac_433
	chr1	15851101	15851362	RT4_K27ac_434		chr1	19281899	19282352	SW_K27ac_434		chr1	9351457	9355690	SC_K27ac_434		chr1	16158965	16159927	HT1376_K27ac_434		chr1	8230113	8230492	T1_H3K27ac_1_434		chr2	170440439	170442451	T3_H3K27ac_434		chr17	38803358	38804932	T4_H3K27ac_434		chr20	34251339	34253809	T5_H3K27ac_434
	chr1	15853258	15853945	RT4_K27ac_435		chr1	19282468	19283132	SW_K27ac_435		chr1	9355886	9356092	SC_K27ac_435		chr1	16160976	16162373	HT1376_K27ac_435		chr1	8241030	8243624	T1_H3K27ac_1_435		chr20	60961103	60963031	T3_H3K27ac_435		chr6	166755341	166756721	T4_H3K27ac_435		chr12	27174283	27176500	T5_H3K27ac_435
	chr1	15884779	15886924	RT4_K27ac_436		chr1	19324008	19324888	SW_K27ac_436		chr1	9357115	9357339	SC_K27ac_436		chr1	16162631	16162937	HT1376_K27ac_436		chr1	8257632	8257797	T1_H3K27ac_1_436		chr12	106695057	106698289	T3_H3K27ac_436		chr9	77701619	77704513	T4_H3K27ac_436		chr1	204377082	204383396	T5_H3K27ac_436
	chr1	15905323	15906354	RT4_K27ac_437		chr1	19325204	19325722	SW_K27ac_437		chr1	9358587	9363510	SC_K27ac_437		chr1	16173479	16174025	HT1376_K27ac_437		chr1	8258024	8258317	T1_H3K27ac_1_437		chr4	122615409	122619334	T3_H3K27ac_437		chr17	80604584	80606496	T4_H3K27ac_437		chr8	132915491	132917546	T5_H3K27ac_437
	chr1	15911100	15911555	RT4_K27ac_438		chr1	19333833	19335080	SW_K27ac_438		chr1	9363675	9364591	SC_K27ac_438		chr1	16174224	16176728	HT1376_K27ac_438		chr1	8260892	8262320	T1_H3K27ac_1_438		chr17	73777980	73783324	T3_H3K27ac_438		chr14	90848641	90851058	T4_H3K27ac_438		chr1	117111597	117114484	T5_H3K27ac_438
	chr1	15929604	15930690	RT4_K27ac_439		chr1	19335687	19337642	SW_K27ac_439		chr1	9374186	9379019	SC_K27ac_439		chr1	16212328	16213667	HT1376_K27ac_439		chr1	8262513	8264348	T1_H3K27ac_1_439		chr2	38976176	38979556	T3_H3K27ac_439		chr3	57677530	57679485	T4_H3K27ac_439		chr3	197517380	197520145	T5_H3K27ac_439
	chr1	15936581	15937203	RT4_K27ac_440		chr1	19338042	19339353	SW_K27ac_440		chr1	9379512	9379768	SC_K27ac_440		chr1	16219268	16220395	HT1376_K27ac_440		chr1	8265047	8265494	T1_H3K27ac_1_440		chr5	139485806	139488666	T3_H3K27ac_440		chr2	28612481	28619935	T4_H3K27ac_440		chr7	139874808	139877663	T5_H3K27ac_440
	chr1	15943957	15944712	RT4_K27ac_441		chr1	19354693	19355803	SW_K27ac_441		chr1	9379907	9380101	SC_K27ac_441		chr1	16276877	16277147	HT1376_K27ac_441		chr1	8268558	8268738	T1_H3K27ac_1_441		chr15	101834025	101836169	T3_H3K27ac_441		chr1	25572538	25574633	T4_H3K27ac_441		chrX	131350202	131353374	T5_H3K27ac_441
	chr1	16007394	16008859	RT4_K27ac_442		chr1	19356120	19356815	SW_K27ac_442		chr1	9380696	9382238	SC_K27ac_442		chr1	16301577	16302604	HT1376_K27ac_442		chr1	8271524	8272075	T1_H3K27ac_1_442		chr1	16159400	16164230	T3_H3K27ac_442		chr17	76835628	76838213	T4_H3K27ac_442		chr1	154192049	154194581	T5_H3K27ac_442
	chr1	16010252	16010850	RT4_K27ac_443		chr1	19359804	19360436	SW_K27ac_443		chr1	9383137	9383413	SC_K27ac_443		chr1	16470130	16470430	HT1376_K27ac_443		chr1	8273462	8273751	T1_H3K27ac_1_443		chr3	57580663	57585162	T3_H3K27ac_443		chr8	71519168	71520622	T4_H3K27ac_443		chr20	277620	280078	T5_H3K27ac_443
	chr1	16085299	16085997	RT4_K27ac_444		chr1	19360858	19361639	SW_K27ac_444		chr1	9384433	9384658	SC_K27ac_444		chr1	16470603	16473446	HT1376_K27ac_444		chr1	8274287	8274587	T1_H3K27ac_1_444		chr3	186500277	186502573	T3_H3K27ac_444		chr13	31039550	31040155	T4_H3K27ac_444		chr3	171756183	171761366	T5_H3K27ac_444
	chr1	16106728	16107913	RT4_K27ac_445		chr1	19536292	19536720	SW_K27ac_445		chr1	9390883	9391653	SC_K27ac_445		chr1	16481338	16482823	HT1376_K27ac_445		chr1	8276725	8276963	T1_H3K27ac_1_445		chr1	37936544	37948138	T3_H3K27ac_445		chr17	7744126	7749150	T4_H3K27ac_445		chr6	36560267	36564180	T5_H3K27ac_445
	chr1	16115318	16115635	RT4_K27ac_446		chr1	19537017	19537614	SW_K27ac_446		chr1	9398123	9400794	SC_K27ac_446		chr1	16493705	16494626	HT1376_K27ac_446		chr1	8277191	8277500	T1_H3K27ac_1_446		chr14	69278686	69285610	T3_H3K27ac_446		chr4	76597432	76599532	T4_H3K27ac_446		chr1	231555606	231558971	T5_H3K27ac_446
	chr1	16122137	16122712	RT4_K27ac_447		chr1	19577551	19578779	SW_K27ac_447		chr1	9429660	9430017	SC_K27ac_447		chr1	16499325	16500181	HT1376_K27ac_447		chr1	8284121	8284286	T1_H3K27ac_1_447		chr4	6783670	6785930	T3_H3K27ac_447		chr19	12892654	12905614	T4_H3K27ac_447		chr14	60713994	60717309	T5_H3K27ac_447
	chr1	16125201	16126648	RT4_K27ac_448		chr1	19638117	19638500	SW_K27ac_448		chr1	9446233	9446742	SC_K27ac_448		chr1	16500362	16501119	HT1376_K27ac_448		chr1	8286692	8286863	T1_H3K27ac_1_448		chr10	70659872	70662105	T3_H3K27ac_448		chr3	171756952	171759832	T4_H3K27ac_448		chr11	101980267	101983782	T5_H3K27ac_448
	chr1	16134840	16135516	RT4_K27ac_449		chr1	19638827	19639243	SW_K27ac_449		chr1	9472668	9474138	SC_K27ac_449		chr1	16502160	16502563	HT1376_K27ac_449		chr1	8318405	8318856	T1_H3K27ac_1_449		chr2	240322685	240324060	T3_H3K27ac_449		chr1	185124839	185127318	T4_H3K27ac_449		chr18	2570541	2572501	T5_H3K27ac_449
	chr1	16142375	16143836	RT4_K27ac_450		chr1	19750903	19751142	SW_K27ac_450		chr1	9488482	9488970	SC_K27ac_450		chr1	16507902	16509129	HT1376_K27ac_450		chr1	8319219	8319838	T1_H3K27ac_1_450		chr12	57502588	57506509	T3_H3K27ac_450		chr3	12704029	12706479	T4_H3K27ac_450		chr5	180687150	180689457	T5_H3K27ac_450
	chr1	16158848	16159458	RT4_K27ac_451		chr1	19751305	19752040	SW_K27ac_451		chr1	9489155	9489782	SC_K27ac_451		chr1	16510655	16511761	HT1376_K27ac_451		chr1	8343397	8343750	T1_H3K27ac_1_451		chr17	45973466	45974881	T3_H3K27ac_451		chr7	35733170	35735428	T4_H3K27ac_451		chr12	46119721	46126421	T5_H3K27ac_451
	chr1	16159646	16159899	RT4_K27ac_452		chr1	19752466	19753344	SW_K27ac_452		chr1	9503995	9504450	SC_K27ac_452		chr1	16532535	16533013	HT1376_K27ac_452		chr1	8344415	8344726	T1_H3K27ac_1_452		chr17	60141078	60143537	T3_H3K27ac_452		chr16	31469046	31471150	T4_H3K27ac_452		chr6	35226322	35228973	T5_H3K27ac_452
	chr1	16160991	16162323	RT4_K27ac_453		chr1	19753540	19753719	SW_K27ac_453		chr1	9599553	9600536	SC_K27ac_453		chr1	16533252	16534024	HT1376_K27ac_453		chr1	8399320	8399518	T1_H3K27ac_1_453		chr18	3591522	3598845	T3_H3K27ac_453		chr14	24681760	24683189	T4_H3K27ac_453		chr9	123680820	123695187	T5_H3K27ac_453
	chr1	16162624	16162822	RT4_K27ac_454		chr1	19756117	19756601	SW_K27ac_454		chr1	9649202	9649954	SC_K27ac_454		chr1	16544073	16544855	HT1376_K27ac_454		chr1	8403421	8404137	T1_H3K27ac_1_454		chr3	9931716	9933968	T3_H3K27ac_454		chr6	36560978	36563176	T4_H3K27ac_454		chr12	98986980	98989016	T5_H3K27ac_454
	chr1	16173743	16173993	RT4_K27ac_455		chr1	19795190	19795754	SW_K27ac_455		chr1	9653053	9654222	SC_K27ac_455		chr1	16562737	16564561	HT1376_K27ac_455		chr1	8411172	8411423	T1_H3K27ac_1_455		chr2	242575524	242577861	T3_H3K27ac_455		chr1	169861787	169864095	T4_H3K27ac_455		chr1	203764708	203765820	T5_H3K27ac_455
	chr1	16174282	16176669	RT4_K27ac_456		chr1	19810820	19812056	SW_K27ac_456		chr1	9704722	9704964	SC_K27ac_456		chr1	16587185	16587827	HT1376_K27ac_456		chr1	8413357	8413666	T1_H3K27ac_1_456		chr19	42754431	42761307	T3_H3K27ac_456		chr1	203273062	203277290	T4_H3K27ac_456		chr8	125485190	125488596	T5_H3K27ac_456
	chr1	16206188	16206685	RT4_K27ac_457		chr1	19812262	19813064	SW_K27ac_457		chr1	9705058	9705479	SC_K27ac_457		chr1	16595766	16595941	HT1376_K27ac_457		chr1	8417165	8417427	T1_H3K27ac_1_457		chr3	73045334	73047085	T3_H3K27ac_457		chr1	234745704	234749526	T4_H3K27ac_457		chr8	144099094	144109065	T5_H3K27ac_457
	chr1	16209330	16210102	RT4_K27ac_458		chr1	19922734	19923180	SW_K27ac_458		chr1	9731166	9731548	SC_K27ac_458		chr1	16651087	16651486	HT1376_K27ac_458		chr1	8428870	8429210	T1_H3K27ac_1_458		chr7	99154610	99157586	T3_H3K27ac_458		chr12	69003692	69007079	T4_H3K27ac_458		chr19	13260190	13268442	T5_H3K27ac_458
	chr1	16212516	16212931	RT4_K27ac_459		chr1	19923520	19924395	SW_K27ac_459		chr1	9731683	9732292	SC_K27ac_459		chr1	16678259	16679697	HT1376_K27ac_459		chr1	8431757	8432294	T1_H3K27ac_1_459		chr10	17268862	17274597	T3_H3K27ac_459		chr19	16186263	16191402	T4_H3K27ac_459		chr13	98084524	98087596	T5_H3K27ac_459
	chr1	16219751	16220526	RT4_K27ac_460		chr1	19971148	19971849	SW_K27ac_460		chr1	9746209	9746568	SC_K27ac_460		chr1	16693657	16694829	HT1376_K27ac_460		chr1	8433742	8434351	T1_H3K27ac_1_460		chr17	80251310	80257718	T3_H3K27ac_460		chr1	36620840	36624273	T4_H3K27ac_460		chr1	46766632	46769983	T5_H3K27ac_460
	chr1	16227174	16227570	RT4_K27ac_461		chr1	20091480	20092171	SW_K27ac_461		chr1	9747111	9748351	SC_K27ac_461		chr1	16701608	16702652	HT1376_K27ac_461		chr1	8438639	8439004	T1_H3K27ac_1_461		chr10	18946741	18950242	T3_H3K27ac_461		chr8	38033255	38035476	T4_H3K27ac_461		chr16	19078430	19080029	T5_H3K27ac_461
	chr1	16232112	16232407	RT4_K27ac_462		chr1	20125764	20126002	SW_K27ac_462		chr1	9749668	9750324	SC_K27ac_462		chr1	16722899	16723459	HT1376_K27ac_462		chr1	8454625	8454875	T1_H3K27ac_1_462		chr1	32108624	32111844	T3_H3K27ac_462		chr22	36042791	36046260	T4_H3K27ac_462		chr21	38443772	38446822	T5_H3K27ac_462
	chr1	16238123	16238706	RT4_K27ac_463		chr1	20208911	20209622	SW_K27ac_463		chr1	9759042	9761344	SC_K27ac_463		chr1	16766847	16768166	HT1376_K27ac_463		chr1	8455201	8456625	T1_H3K27ac_1_463		chr6	111302458	111304025	T3_H3K27ac_463		chr3	114864603	114867473	T4_H3K27ac_463		chr5	131821090	131828323	T5_H3K27ac_463
	chr1	16241830	16242305	RT4_K27ac_464		chr1	20248849	20249491	SW_K27ac_464		chr1	9764728	9765098	SC_K27ac_464		chr1	16791271	16792139	HT1376_K27ac_464		chr1	8456984	8457992	T1_H3K27ac_1_464		chr16	19078151	19080062	T3_H3K27ac_464		chr10	1094171	1096876	T4_H3K27ac_464		chr11	62646954	62651149	T5_H3K27ac_464
	chr1	16243199	16243694	RT4_K27ac_465		chr1	20249650	20250108	SW_K27ac_465		chr1	9774417	9774613	SC_K27ac_465		chr1	16825225	16826182	HT1376_K27ac_465		chr1	8458273	8458944	T1_H3K27ac_1_465		chr20	43513531	43518411	T3_H3K27ac_465		chr11	1968518	1970797	T4_H3K27ac_465		chr13	49549114	49552133	T5_H3K27ac_465
	chr1	16263739	16264334	RT4_K27ac_466		chr1	20250494	20250702	SW_K27ac_466		chr1	9777906	9778074	SC_K27ac_466		chr1	16839505	16839803	HT1376_K27ac_466		chr1	8464664	8464829	T1_H3K27ac_1_466		chr5	107715831	107719303	T3_H3K27ac_466		chr1	212458665	212460432	T4_H3K27ac_466		chr16	56965263	56969549	T5_H3K27ac_466
	chr1	16301962	16302804	RT4_K27ac_467		chr1	20251034	20251971	SW_K27ac_467		chr1	9778853	9779043	SC_K27ac_467		chr1	16886242	16886723	HT1376_K27ac_467		chr1	8468500	8469668	T1_H3K27ac_1_467		chr5	139553935	139556402	T3_H3K27ac_467		chr3	156391569	156393980	T4_H3K27ac_467		chr6	4017413	4019896	T5_H3K27ac_467
	chr1	16405583	16406200	RT4_K27ac_468		chr1	20252106	20252856	SW_K27ac_468		chr1	9781192	9782069	SC_K27ac_468		chr1	16908144	16908706	HT1376_K27ac_468		chr1	8471860	8472339	T1_H3K27ac_1_468		chr4	184364179	184367062	T3_H3K27ac_468		chr13	103248658	103250295	T4_H3K27ac_468		chr6	31780509	31783710	T5_H3K27ac_468
	chr1	16415001	16415705	RT4_K27ac_469		chr1	20253393	20253997	SW_K27ac_469		chr1	9818302	9818654	SC_K27ac_469		chr1	16927471	16927657	HT1376_K27ac_469		chr1	8476325	8476578	T1_H3K27ac_1_469		chr8	103873998	103877930	T3_H3K27ac_469		chr13	98084457	98087392	T4_H3K27ac_469		chr15	55577579	55583258	T5_H3K27ac_469
	chr1	16448784	16449483	RT4_K27ac_470		chr1	20463756	20464226	SW_K27ac_470		chr1	9818711	9819942	SC_K27ac_470		chr1	16939173	16940401	HT1376_K27ac_470		chr1	8477575	8478156	T1_H3K27ac_1_470		chr19	10763394	10764711	T3_H3K27ac_470		chr15	41407264	41409168	T4_H3K27ac_470		chr10	65279861	65282688	T5_H3K27ac_470
	chr1	16465619	16466043	RT4_K27ac_471		chr1	20464518	20465587	SW_K27ac_471		chr1	9821595	9821866	SC_K27ac_471		chr1	16947022	16947520	HT1376_K27ac_471		chr1	8480719	8481087	T1_H3K27ac_1_471		chr2	55843138	55846215	T3_H3K27ac_471		chr2	58272599	58275087	T4_H3K27ac_471		chr4	56261436	56264808	T5_H3K27ac_471
	chr1	16470111	16470482	RT4_K27ac_472		chr1	20465835	20466865	SW_K27ac_472		chr1	9824019	9824590	SC_K27ac_472		chr1	16970620	16971921	HT1376_K27ac_472		chr1	8481794	8482149	T1_H3K27ac_1_472		chr13	52375610	52379643	T3_H3K27ac_472		chr3	122281596	122284971	T4_H3K27ac_472		chr6	31238395	31241095	T5_H3K27ac_472
	chr1	16470634	16472275	RT4_K27ac_473		chr1	20478456	20478817	SW_K27ac_473		chr1	9824764	9825125	SC_K27ac_473		chr1	17054107	17054433	HT1376_K27ac_473		chr1	8482371	8485538	T1_H3K27ac_1_473		chr22	41806003	41811613	T3_H3K27ac_473		chr4	24584761	24586982	T4_H3K27ac_473		chr8	64079952	64082778	T5_H3K27ac_473
	chr1	16479179	16480126	RT4_K27ac_474		chr1	20479187	20482061	SW_K27ac_474		chr1	9825383	9828693	SC_K27ac_474		chr1	17222738	17223767	HT1376_K27ac_474		chr1	8487125	8487613	T1_H3K27ac_1_474		chr4	69214226	69216594	T3_H3K27ac_474		chr5	42948542	42952478	T4_H3K27ac_474		chr9	33156636	33168561	T5_H3K27ac_474
	chr1	16481340	16482552	RT4_K27ac_475		chr1	20536273	20538093	SW_K27ac_475		chr1	9829215	9829467	SC_K27ac_475		chr1	17230608	17231731	HT1376_K27ac_475		chr1	8487918	8488223	T1_H3K27ac_1_475		chr1	156714495	156723082	T3_H3K27ac_475		chr19	1130510	1134380	T4_H3K27ac_475		chr3	9437082	9441370	T5_H3K27ac_475
	chr1	16493706	16494920	RT4_K27ac_476		chr1	20538292	20539454	SW_K27ac_476		chr1	9842761	9843170	SC_K27ac_476		chr1	17240638	17241360	HT1376_K27ac_476		chr1	8490993	8491158	T1_H3K27ac_1_476		chr1	224620328	224623438	T3_H3K27ac_476		chr12	123378751	123381205	T4_H3K27ac_476		chr4	140096767	140100677	T5_H3K27ac_476
	chr1	16499467	16500705	RT4_K27ac_477		chr1	20539732	20540098	SW_K27ac_477		chr1	9852079	9852440	SC_K27ac_477		chr1	17251637	17252668	HT1376_K27ac_477		chr1	8498062	8498388	T1_H3K27ac_1_477		chr19	57790534	57792926	T3_H3K27ac_477		chr1	150205749	150208496	T4_H3K27ac_477		chr3	57677342	57679586	T5_H3K27ac_477
	chr1	16502142	16502590	RT4_K27ac_478		chr1	20558591	20558803	SW_K27ac_478		chr1	9864434	9865232	SC_K27ac_478		chr1	17274936	17275495	HT1376_K27ac_478		chr1	8508672	8508841	T1_H3K27ac_1_478		chr22	36756822	36785585	T3_H3K27ac_478		chr3	196466624	196468291	T4_H3K27ac_478		chr2	64244890	64247682	T5_H3K27ac_478
	chr1	16508034	16509036	RT4_K27ac_479		chr1	20575416	20575757	SW_K27ac_479		chr1	9869295	9869777	SC_K27ac_479		chr1	17278943	17279137	HT1376_K27ac_479		chr1	8508997	8509581	T1_H3K27ac_1_479		chr3	46032200	46037720	T3_H3K27ac_479		chr12	96792002	96795617	T4_H3K27ac_479		chr17	41797463	41799062	T5_H3K27ac_479
	chr1	16510642	16511248	RT4_K27ac_480		chr1	20576274	20577881	SW_K27ac_480		chr1	9871394	9871622	SC_K27ac_480		chr1	17287058	17288252	HT1376_K27ac_480		chr1	8517751	8517977	T1_H3K27ac_1_480		chr8	61428890	61430585	T3_H3K27ac_480		chr19	11199649	11204492	T4_H3K27ac_480		chr1	26797842	26800115	T5_H3K27ac_480
	chr1	16563391	16563668	RT4_K27ac_481		chr1	20593216	20593542	SW_K27ac_481		chr1	9872279	9872477	SC_K27ac_481		chr1	17310871	17311832	HT1376_K27ac_481		chr1	8520900	8521198	T1_H3K27ac_1_481		chr11	63741712	63744040	T3_H3K27ac_481		chr6	157341281	157343907	T4_H3K27ac_481		chr20	2082051	2084858	T5_H3K27ac_481
	chr1	16661320	16662000	RT4_K27ac_482		chr1	20682057	20682299	SW_K27ac_482		chr1	9876864	9877261	SC_K27ac_482		chr1	17379783	17381685	HT1376_K27ac_482		chr1	8523431	8524077	T1_H3K27ac_1_482		chr1	41156328	41158978	T3_H3K27ac_482		chr1	22107284	22110420	T4_H3K27ac_482		chr9	132222792	132224224	T5_H3K27ac_482
	chr1	16678196	16679682	RT4_K27ac_483		chr1	20682763	20683267	SW_K27ac_483		chr1	9882384	9884039	SC_K27ac_483		chr1	17435571	17435878	HT1376_K27ac_483		chr1	8524299	8524661	T1_H3K27ac_1_483		chr14	96967736	96969998	T3_H3K27ac_483		chr8	133787536	133788556	T4_H3K27ac_483		chr2	58272203	58275520	T5_H3K27ac_483
	chr1	16693704	16694597	RT4_K27ac_484		chr1	20810655	20811963	SW_K27ac_484		chr1	9884227	9886401	SC_K27ac_484		chr1	17454012	17455747	HT1376_K27ac_484		chr1	8569623	8570215	T1_H3K27ac_1_484		chr17	71300054	71309157	T3_H3K27ac_484		chr3	169897318	169900154	T4_H3K27ac_484		chr20	57463336	57468770	T5_H3K27ac_484
	chr1	16722378	16723238	RT4_K27ac_485		chr1	20812121	20813298	SW_K27ac_485		chr1	9886565	9886961	SC_K27ac_485		chr1	17482141	17482970	HT1376_K27ac_485		chr1	8578133	8578540	T1_H3K27ac_1_485		chr10	32342263	32346182	T3_H3K27ac_485		chr3	17781044	17785064	T4_H3K27ac_485		chr6	31788721	31795917	T5_H3K27ac_485
	chr1	16766975	16767845	RT4_K27ac_486		chr1	20820601	20822719	SW_K27ac_486		chr1	9887164	9887530	SC_K27ac_486		chr1	17489065	17490244	HT1376_K27ac_486		chr1	8585310	8586293	T1_H3K27ac_1_486		chr14	103798582	103802068	T3_H3K27ac_486		chr3	186500267	186502797	T4_H3K27ac_486		chr11	66884598	66889565	T5_H3K27ac_486
	chr1	16825388	16826126	RT4_K27ac_487		chr1	20823040	20823778	SW_K27ac_487		chr1	9887585	9888802	SC_K27ac_487		chr1	17503161	17503468	HT1376_K27ac_487		chr1	8600309	8600633	T1_H3K27ac_1_487		chr17	74730298	74734831	T3_H3K27ac_487		chr3	136580336	136582243	T4_H3K27ac_487		chr12	62995588	62997995	T5_H3K27ac_487
	chr1	16839557	16839779	RT4_K27ac_488		chr1	20834034	20835156	SW_K27ac_488		chr1	9895237	9895958	SC_K27ac_488		chr1	17507161	17507343	HT1376_K27ac_488		chr1	8602114	8602412	T1_H3K27ac_1_488		chr11	64544372	64547708	T3_H3K27ac_488		chr11	67118797	67123417	T4_H3K27ac_488		chr1	94145037	94148520	T5_H3K27ac_488
	chr1	16886149	16886804	RT4_K27ac_489		chr1	20939637	20940364	SW_K27ac_489		chr1	9896012	9896964	SC_K27ac_489		chr1	17515784	17517757	HT1376_K27ac_489		chr1	8656344	8656852	T1_H3K27ac_1_489		chr6	16758475	16764451	T3_H3K27ac_489		chr2	28972668	28976528	T4_H3K27ac_489		chr7	134853875	134856996	T5_H3K27ac_489
	chr1	16891879	16892173	RT4_K27ac_490		chr1	20987132	20987925	SW_K27ac_490		chr1	9926523	9926718	SC_K27ac_490		chr1	17534160	17535384	HT1376_K27ac_490		chr1	8659897	8660067	T1_H3K27ac_1_490		chr20	48726302	48731042	T3_H3K27ac_490		chr5	65439404	65441523	T4_H3K27ac_490		chr7	148822518	148825546	T5_H3K27ac_490
	chr1	16892395	16892856	RT4_K27ac_491		chr1	20988160	20988586	SW_K27ac_491		chr1	9929919	9930529	SC_K27ac_491		chr1	17540983	17542703	HT1376_K27ac_491		chr1	8686843	8687016	T1_H3K27ac_1_491		chr5	131744268	131748804	T3_H3K27ac_491		chr5	96142764	96144446	T4_H3K27ac_491		chr10	74853971	74857481	T5_H3K27ac_491
	chr1	16893026	16893908	RT4_K27ac_492		chr1	21059064	21059613	SW_K27ac_492		chr1	9941536	9942901	SC_K27ac_492		chr1	17559312	17560740	HT1376_K27ac_492		chr1	8689590	8689878	T1_H3K27ac_1_492		chr8	17779369	17781858	T3_H3K27ac_492		chr7	104622816	104625700	T4_H3K27ac_492		chr17	7588111	7591367	T5_H3K27ac_492
	chr1	16928192	16928914	RT4_K27ac_493		chr1	21059874	21060344	SW_K27ac_493		chr1	9949226	9949857	SC_K27ac_493		chr1	17576944	17578708	HT1376_K27ac_493		chr1	8703638	8703804	T1_H3K27ac_1_493		chr12	109121812	109130007	T3_H3K27ac_493		chr3	141204653	141207370	T4_H3K27ac_493		chr2	97150635	97153476	T5_H3K27ac_493
	chr1	16930725	16930967	RT4_K27ac_494		chr1	21112567	21113095	SW_K27ac_494		chr1	9949912	9952250	SC_K27ac_494		chr1	17614322	17614642	HT1376_K27ac_494		chr1	8721073	8721238	T1_H3K27ac_1_494		chr1	46766378	46770343	T3_H3K27ac_494		chr9	33288965	33291463	T4_H3K27ac_494		chr5	108744217	108747544	T5_H3K27ac_494
	chr1	16939099	16940508	RT4_K27ac_495		chr1	21113368	21113727	SW_K27ac_495		chr1	9952499	9954379	SC_K27ac_495		chr1	17615858	17616819	HT1376_K27ac_495		chr1	8721459	8721710	T1_H3K27ac_1_495		chr1	1092918	1095037	T3_H3K27ac_495		chr22	27066729	27071759	T4_H3K27ac_495		chr9	132369135	132374266	T5_H3K27ac_495
	chr1	16947141	16947684	RT4_K27ac_496		chr1	21349002	21349342	SW_K27ac_496		chr1	9958254	9958874	SC_K27ac_496		chr1	17630737	17631117	HT1376_K27ac_496		chr1	8722152	8722416	T1_H3K27ac_1_496		chr12	50134550	50137113	T3_H3K27ac_496		chr2	242576251	242577510	T4_H3K27ac_496		chr12	30846974	30849755	T5_H3K27ac_496
	chr1	16970617	16971894	RT4_K27ac_497		chr1	21502186	21502985	SW_K27ac_497		chr1	9967148	9967608	SC_K27ac_497		chr1	17674740	17675046	HT1376_K27ac_497		chr1	8722578	8722787	T1_H3K27ac_1_497		chr2	109334865	109338144	T3_H3K27ac_497		chrX	40943191	40946670	T4_H3K27ac_497		chr10	106095084	106100340	T5_H3K27ac_497
	chr1	17222716	17223678	RT4_K27ac_498		chr1	21503130	21503373	SW_K27ac_498		chr1	9969340	9970100	SC_K27ac_498		chr1	17729496	17729734	HT1376_K27ac_498		chr1	8723508	8724252	T1_H3K27ac_1_498		chr5	133705307	133708950	T3_H3K27ac_498		chrX	41190559	41194796	T4_H3K27ac_498		chr17	80604741	80606448	T5_H3K27ac_498
	chr1	17231087	17231722	RT4_K27ac_499		chr1	21587761	21589446	SW_K27ac_499		chr1	9970713	9971519	SC_K27ac_499		chr1	17738354	17738663	HT1376_K27ac_499		chr1	8730972	8731634	T1_H3K27ac_1_499		chr7	73587619	73591288	T3_H3K27ac_499		chrX	48899187	48901134	T4_H3K27ac_499		chr11	355161	356449	T5_H3K27ac_499
	chr1	17240641	17241152	RT4_K27ac_500		chr1	21616534	21617324	SW_K27ac_500		chr1	10002575	10004052	SC_K27ac_500		chr1	17738950	17739686	HT1376_K27ac_500		chr1	8734543	8734721	T1_H3K27ac_1_500		chr16	69597433	69602590	T3_H3K27ac_500		chr8	102216620	102219256	T4_H3K27ac_500		chr13	31036291	31040163	T5_H3K27ac_500
	chr1	17251735	17252634	RT4_K27ac_501		chr1	21620499	21620898	SW_K27ac_501		chr1	10017257	10017555	SC_K27ac_501		chr1	17764572	17765860	HT1376_K27ac_501		chr1	8739467	8739665	T1_H3K27ac_1_501		chr17	27618531	27622228	T3_H3K27ac_501		chr7	5461165	5470400	T4_H3K27ac_501		chr12	56121099	56125019	T5_H3K27ac_501
	chr1	17287159	17287724	RT4_K27ac_502		chr1	21621319	21621818	SW_K27ac_502		chr1	10017934	10018237	SC_K27ac_502		chr1	17766407	17769013	HT1376_K27ac_502		chr1	8740850	8741387	T1_H3K27ac_1_502		chr3	156804204	156809819	T3_H3K27ac_502		chr1	183602996	183605064	T4_H3K27ac_502		chr15	63413484	63414683	T5_H3K27ac_502
	chr1	17337757	17338096	RT4_K27ac_503		chr1	21650594	21650995	SW_K27ac_503		chr1	10018564	10018877	SC_K27ac_503		chr1	17786279	17787935	HT1376_K27ac_503		chr1	8747292	8747512	T1_H3K27ac_1_503		chr1	40626384	40628787	T3_H3K27ac_503		chr15	52969305	52973677	T4_H3K27ac_503		chr6	30648877	30660351	T5_H3K27ac_503
	chr1	17379758	17380575	RT4_K27ac_504		chr1	21651527	21653016	SW_K27ac_504		chr1	10019061	10019865	SC_K27ac_504		chr1	17801748	17802308	HT1376_K27ac_504		chr1	8751218	8751490	T1_H3K27ac_1_504		chr18	46465128	46484735	T3_H3K27ac_504		chr4	25235563	25236427	T4_H3K27ac_504		chr6	43594393	43599175	T5_H3K27ac_504
	chr1	17380795	17381090	RT4_K27ac_505		chr1	21655424	21655707	SW_K27ac_505		chr1	10019974	10020384	SC_K27ac_505		chr1	17802486	17803227	HT1376_K27ac_505		chr1	8761397	8762687	T1_H3K27ac_1_505		chr19	8509074	8511067	T3_H3K27ac_505		chr1	109203016	109204666	T4_H3K27ac_505		chr1	212782047	212784990	T5_H3K27ac_505
	chr1	17424416	17424870	RT4_K27ac_506		chr1	21656207	21656574	SW_K27ac_506		chr1	10020440	10021351	SC_K27ac_506		chr1	17846357	17847928	HT1376_K27ac_506		chr1	8762845	8763514	T1_H3K27ac_1_506		chr3	37032099	37036627	T3_H3K27ac_506		chr8	37706643	37708615	T4_H3K27ac_506		chr14	65380809	65382334	T5_H3K27ac_506
	chr1	17439954	17440529	RT4_K27ac_507		chr1	21656849	21657502	SW_K27ac_507		chr1	10092055	10092779	SC_K27ac_507		chr1	17865801	17866141	HT1376_K27ac_507		chr1	8772467	8773070	T1_H3K27ac_1_507		chr6	30293051	30296059	T3_H3K27ac_507		chr12	22696000	22697885	T4_H3K27ac_507		chr15	59224076	59227069	T5_H3K27ac_507
	chr1	17454169	17455614	RT4_K27ac_508		chr1	21661467	21661644	SW_K27ac_508		chr1	10092987	10094126	SC_K27ac_508		chr1	17866356	17867214	HT1376_K27ac_508		chr1	8800020	8800185	T1_H3K27ac_1_508		chr1	228327083	228329932	T3_H3K27ac_508		chr2	61403546	61405554	T4_H3K27ac_508		chr17	48942169	48946015	T5_H3K27ac_508
	chr1	17466557	17466795	RT4_K27ac_509		chr1	21671394	21671644	SW_K27ac_509		chr1	10115365	10115802	SC_K27ac_509		chr1	17877934	17878198	HT1376_K27ac_509		chr1	8800873	8801244	T1_H3K27ac_1_509		chr11	35159899	35169222	T3_H3K27ac_509		chr16	47494493	47495921	T4_H3K27ac_509		chr17	63048233	63055343	T5_H3K27ac_509
	chr1	17519097	17519314	RT4_K27ac_510		chr1	21940673	21941832	SW_K27ac_510		chr1	10115994	10116593	SC_K27ac_510		chr1	17879961	17880533	HT1376_K27ac_510		chr1	8858309	8858474	T1_H3K27ac_1_510		chr5	133510792	133513840	T3_H3K27ac_510		chr12	8178616	8180233	T4_H3K27ac_510		chr7	139042773	139046288	T5_H3K27ac_510
	chr1	17527134	17528814	RT4_K27ac_511		chr1	21952377	21953636	SW_K27ac_511		chr1	10116694	10117138	SC_K27ac_511		chr1	17880709	17881284	HT1376_K27ac_511		chr1	8862519	8862684	T1_H3K27ac_1_511		chr5	108742322	108749064	T3_H3K27ac_511		chr11	18547537	18549767	T4_H3K27ac_511		chr9	100744731	100748126	T5_H3K27ac_511
	chr1	17533495	17534969	RT4_K27ac_512		chr1	21953921	21954460	SW_K27ac_512		chr1	10117934	10118199	SC_K27ac_512		chr1	17885759	17887463	HT1376_K27ac_512		chr1	8876559	8878765	T1_H3K27ac_1_512		chr4	95372296	95375269	T3_H3K27ac_512		chr13	113862195	113864782	T4_H3K27ac_512		chr19	45240544	45255209	T5_H3K27ac_512
	chr1	17541182	17541764	RT4_K27ac_513		chr1	21955744	21956132	SW_K27ac_513		chr1	10122449	10122883	SC_K27ac_513		chr1	17887802	17888507	HT1376_K27ac_513		chr1	8907865	8908066	T1_H3K27ac_1_513		chr12	107485574	107488304	T3_H3K27ac_513		chr10	135121111	135122759	T4_H3K27ac_513		chr11	65428820	65432248	T5_H3K27ac_513
	chr1	17541931	17542853	RT4_K27ac_514		chr1	21959070	21959505	SW_K27ac_514		chr1	10122970	10125010	SC_K27ac_514		chr1	17895549	17896933	HT1376_K27ac_514		chr1	8913828	8914081	T1_H3K27ac_1_514		chr1	236026908	236031615	T3_H3K27ac_514		chr20	35233022	35237040	T4_H3K27ac_514		chr12	109121742	109128236	T5_H3K27ac_514
	chr1	17552702	17553121	RT4_K27ac_515		chr1	21961023	21961328	SW_K27ac_515		chr1	10125281	10125550	SC_K27ac_515		chr1	17908456	17909509	HT1376_K27ac_515		chr1	8918538	8918704	T1_H3K27ac_1_515		chr7	99612858	99614652	T3_H3K27ac_515		chr3	184079178	184081683	T4_H3K27ac_515		chr2	198298381	198301565	T5_H3K27ac_515
	chr1	17555529	17555968	RT4_K27ac_516		chr1	21965462	21965975	SW_K27ac_516		chr1	10134684	10135086	SC_K27ac_516		chr1	17913757	17914042	HT1376_K27ac_516		chr1	8919101	8919339	T1_H3K27ac_1_516		chr13	111564623	111569537	T3_H3K27ac_516		chr10	93682889	93684457	T4_H3K27ac_516		chr3	19987372	19990107	T5_H3K27ac_516
	chr1	17559221	17560679	RT4_K27ac_517		chr1	22107939	22108182	SW_K27ac_517		chr1	10142318	10142562	SC_K27ac_517		chr1	17914437	17915167	HT1376_K27ac_517		chr1	8933878	8934430	T1_H3K27ac_1_517		chr11	1968496	1971659	T3_H3K27ac_517		chr12	62652529	62655157	T4_H3K27ac_517		chr19	56164506	56167610	T5_H3K27ac_517
	chr1	17571925	17573271	RT4_K27ac_518		chr1	22109084	22109493	SW_K27ac_518		chr1	10167338	10168494	SC_K27ac_518		chr1	17956930	17957465	HT1376_K27ac_518		chr1	8934766	8935370	T1_H3K27ac_1_518		chr10	98345141	98348153	T3_H3K27ac_518		chr1	85740531	85743488	T4_H3K27ac_518		chr22	39914705	39918043	T5_H3K27ac_518
	chr1	17613828	17614091	RT4_K27ac_519		chr1	22109692	22110216	SW_K27ac_519		chr1	10269777	10270511	SC_K27ac_519		chr1	18006592	18007080	HT1376_K27ac_519		chr1	8936715	8940863	T1_H3K27ac_1_519		chr20	43148629	43151896	T3_H3K27ac_519		chr19	34662315	34664720	T4_H3K27ac_519		chr19	42755174	42760852	T5_H3K27ac_519
	chr1	17615902	17616520	RT4_K27ac_520		chr1	22143116	22143431	SW_K27ac_520		chr1	10270614	10270843	SC_K27ac_520		chr1	18007316	18009034	HT1376_K27ac_520		chr1	8959553	8960038	T1_H3K27ac_1_520		chr1	25572633	25574720	T3_H3K27ac_520		chr12	62995670	62998468	T4_H3K27ac_520		chr14	96967460	96970290	T5_H3K27ac_520
	chr1	17618722	17619298	RT4_K27ac_521		chr1	22196622	22196834	SW_K27ac_521		chr1	10270983	10272203	SC_K27ac_521		chr1	18009215	18010137	HT1376_K27ac_521		chr1	8960310	8960591	T1_H3K27ac_1_521		chr2	55274634	55279895	T3_H3K27ac_521		chr1	154579460	154582359	T4_H3K27ac_521		chr2	64067136	64070362	T5_H3K27ac_521
	chr1	17630019	17631666	RT4_K27ac_522		chr1	22230930	22231381	SW_K27ac_522		chr1	10447196	10447545	SC_K27ac_522		chr1	18015026	18015673	HT1376_K27ac_522		chr1	8963808	8964190	T1_H3K27ac_1_522		chr1	109288667	109290475	T3_H3K27ac_522		chr12	12713479	12716436	T4_H3K27ac_522		chr11	116965009	116970646	T5_H3K27ac_522
	chr1	17636154	17636688	RT4_K27ac_523		chr1	22257388	22257636	SW_K27ac_523		chr1	10447618	10448177	SC_K27ac_523		chr1	19228604	19230157	HT1376_K27ac_523		chr1	8965663	8965828	T1_H3K27ac_1_523		chr12	13250033	13256258	T3_H3K27ac_523		chr17	20944257	20946444	T4_H3K27ac_523		chr3	67703896	67706182	T5_H3K27ac_523
	chr1	17674358	17675243	RT4_K27ac_524		chr1	22257806	22258692	SW_K27ac_524		chr1	10448740	10449132	SC_K27ac_524		chr1	19248612	19249498	HT1376_K27ac_524		chr1	8970974	8971688	T1_H3K27ac_1_524		chr1	25664420	25666388	T3_H3K27ac_524		chr6	111803051	111806240	T4_H3K27ac_524		chr5	131131735	131133850	T5_H3K27ac_524
	chr1	17749016	17749343	RT4_K27ac_525		chr1	22259926	22260862	SW_K27ac_525		chr1	10458517	10458902	SC_K27ac_525		chr1	19252851	19253759	HT1376_K27ac_525		chr1	8971880	8972274	T1_H3K27ac_1_525		chr15	102191252	102193716	T3_H3K27ac_525		chr1	23669632	23671681	T4_H3K27ac_525		chr17	6654995	6661225	T5_H3K27ac_525
	chr1	17764604	17766163	RT4_K27ac_526		chr1	22262541	22263675	SW_K27ac_526		chr1	10459051	10459498	SC_K27ac_526		chr1	19264092	19264403	HT1376_K27ac_526		chr1	8988810	8988975	T1_H3K27ac_1_526		chr17	18160130	18162621	T3_H3K27ac_526		chr9	88896604	88898413	T4_H3K27ac_526		chr19	35489155	35493129	T5_H3K27ac_526
	chr1	17767083	17768349	RT4_K27ac_527		chr1	22281686	22283351	SW_K27ac_527		chr1	10474909	10475834	SC_K27ac_527		chr1	19265249	19265883	HT1376_K27ac_527		chr1	9031175	9031387	T1_H3K27ac_1_527		chr7	108164995	108168867	T3_H3K27ac_527		chr7	2593787	2595703	T4_H3K27ac_527		chr10	112626608	112633322	T5_H3K27ac_527
	chr1	17800640	17801118	RT4_K27ac_528		chr1	22283571	22284280	SW_K27ac_528		chr1	10476130	10476380	SC_K27ac_528		chr1	19281873	19283139	HT1376_K27ac_528		chr1	9061686	9061944	T1_H3K27ac_1_528		chr13	48876914	48880421	T3_H3K27ac_528		chr19	13956582	13959441	T4_H3K27ac_528		chr1	224031715	224035201	T5_H3K27ac_528
	chr1	17846331	17847941	RT4_K27ac_529		chr1	22351850	22352448	SW_K27ac_529		chr1	10490469	10491342	SC_K27ac_529		chr1	19283497	19283892	HT1376_K27ac_529		chr1	9062122	9062322	T1_H3K27ac_1_529		chr17	37617197	37619681	T3_H3K27ac_529		chr9	131900805	131904900	T4_H3K27ac_529		chr1	235488621	235494249	T5_H3K27ac_529
	chr1	17855786	17856158	RT4_K27ac_530		chr1	22371383	22371670	SW_K27ac_530		chr1	10518754	10519234	SC_K27ac_530		chr1	19289041	19289270	HT1376_K27ac_530		chr1	9109462	9109757	T1_H3K27ac_1_530		chr12	90100520	90104753	T3_H3K27ac_530		chr13	34115306	34118493	T4_H3K27ac_530		chr18	9913096	9916414	T5_H3K27ac_530
	chr1	17866339	17867204	RT4_K27ac_531		chr1	22379166	22380104	SW_K27ac_531		chr1	10519879	10520102	SC_K27ac_531		chr1	19292097	19292358	HT1376_K27ac_531		chr1	9122506	9122683	T1_H3K27ac_1_531		chr7	100463267	100466963	T3_H3K27ac_531		chr4	153455524	153459530	T4_H3K27ac_531		chr5	150079664	150081323	T5_H3K27ac_531
	chr1	17871565	17872643	RT4_K27ac_532		chr1	22396323	22396639	SW_K27ac_532		chr1	10531803	10532647	SC_K27ac_532		chr1	19323819	19324900	HT1376_K27ac_532		chr1	9124407	9124572	T1_H3K27ac_1_532		chr14	75641814	75644083	T3_H3K27ac_532		chr19	1269165	1270706	T4_H3K27ac_532		chr8	91012496	91015093	T5_H3K27ac_532
	chr1	17877715	17878876	RT4_K27ac_533		chr1	22555756	22555971	SW_K27ac_533		chr1	10534682	10535806	SC_K27ac_533		chr1	19325134	19325780	HT1376_K27ac_533		chr1	9124753	9124918	T1_H3K27ac_1_533		chr12	49109256	49111709	T3_H3K27ac_533		chr15	25683074	25684948	T4_H3K27ac_533		chrX	129242252	129245866	T5_H3K27ac_533
	chr1	17879930	17880508	RT4_K27ac_534		chr1	22599878	22600262	SW_K27ac_534		chr1	10539187	10539516	SC_K27ac_534		chr1	19336489	19338545	HT1376_K27ac_534		chr1	9125251	9125878	T1_H3K27ac_1_534		chr12	94070528	94072836	T3_H3K27ac_534		chr1	8936572	8939700	T4_H3K27ac_534		chr12	46776366	46779659	T5_H3K27ac_534
	chr1	17880773	17881265	RT4_K27ac_535		chr1	22600450	22601807	SW_K27ac_535		chr1	10555342	10556943	SC_K27ac_535		chr1	19355570	19355859	HT1376_K27ac_535		chr1	9126810	9127302	T1_H3K27ac_1_535		chr17	41320744	41325446	T3_H3K27ac_535		chr9	132220123	132224146	T4_H3K27ac_535		chr7	39646505	39651300	T5_H3K27ac_535
	chr1	17885889	17886364	RT4_K27ac_536		chr1	22602065	22602489	SW_K27ac_536		chr1	10569853	10570687	SC_K27ac_536		chr1	19356058	19356506	HT1376_K27ac_536		chr1	9128981	9129978	T1_H3K27ac_1_536		chr19	19302333	19305642	T3_H3K27ac_536		chr4	83350028	83352428	T4_H3K27ac_536		chr11	67139560	67143586	T5_H3K27ac_536
	chr1	17886537	17888239	RT4_K27ac_537		chr1	22738604	22738974	SW_K27ac_537		chr1	10571576	10571944	SC_K27ac_537		chr1	19359981	19360418	HT1376_K27ac_537		chr1	9130269	9130483	T1_H3K27ac_1_537		chr2	220142637	220145766	T3_H3K27ac_537		chr7	1014519	1015285	T4_H3K27ac_537		chr12	6601819	6603067	T5_H3K27ac_537
	chr1	17888448	17888952	RT4_K27ac_538		chr1	22739468	22739965	SW_K27ac_538		chr1	10572278	10572496	SC_K27ac_538		chr1	19360663	19361399	HT1376_K27ac_538		chr1	9139037	9139214	T1_H3K27ac_1_538		chr5	43483354	43485922	T3_H3K27ac_538		chr2	191397610	191400962	T4_H3K27ac_538		chr7	5594061	5599073	T5_H3K27ac_538
	chr1	17895462	17896991	RT4_K27ac_539		chr1	22741012	22741314	SW_K27ac_539		chr1	10587801	10589575	SC_K27ac_539		chr1	19378243	19379581	HT1376_K27ac_539		chr1	9139568	9139798	T1_H3K27ac_1_539		chr8	38854431	38859582	T3_H3K27ac_539		chr1	222816891	222818520	T4_H3K27ac_539		chr19	18392619	18394551	T5_H3K27ac_539
	chr1	17906253	17907117	RT4_K27ac_540		chr1	22778399	22778906	SW_K27ac_540		chr1	10589932	10590127	SC_K27ac_540		chr1	19390845	19391071	HT1376_K27ac_540		chr1	9172154	9173746	T1_H3K27ac_1_540		chr2	65454166	65456283	T3_H3K27ac_540		chr20	36660526	36662731	T4_H3K27ac_540		chr2	233414638	233416092	T5_H3K27ac_540
	chr1	17907946	17908732	RT4_K27ac_541		chr1	22972643	22972832	SW_K27ac_541		chr1	10658068	10658748	SC_K27ac_541		chr1	19489728	19492081	HT1376_K27ac_541		chr1	9174760	9174925	T1_H3K27ac_1_541		chr7	32929072	32933322	T3_H3K27ac_541		chr2	198317310	198319222	T4_H3K27ac_541		chr3	57580796	57583182	T5_H3K27ac_541
	chr1	17908895	17909541	RT4_K27ac_542		chr1	23076517	23077173	SW_K27ac_542		chr1	10658881	10660796	SC_K27ac_542		chr1	19536002	19537626	HT1376_K27ac_542		chr1	9188385	9189228	T1_H3K27ac_1_542		chr7	66053743	66058328	T3_H3K27ac_542		chr6	30180319	30182640	T4_H3K27ac_542		chr9	125664948	125668273	T5_H3K27ac_542
	chr1	17950686	17951807	RT4_K27ac_543		chr1	23152109	23153410	SW_K27ac_543		chr1	10678623	10678899	SC_K27ac_543		chr1	19567991	19568338	HT1376_K27ac_543		chr1	9189526	9190046	T1_H3K27ac_1_543		chr5	171431684	171435058	T3_H3K27ac_543		chr17	7475338	7477990	T4_H3K27ac_543		chr15	93442949	93453105	T5_H3K27ac_543
	chr1	17985380	17985957	RT4_K27ac_544		chr1	23153597	23154978	SW_K27ac_544		chr1	10694222	10696688	SC_K27ac_544		chr1	19577629	19579207	HT1376_K27ac_544		chr1	9211382	9211650	T1_H3K27ac_1_544		chr17	73773864	73776495	T3_H3K27ac_544		chr12	64845459	64847151	T4_H3K27ac_544		chr9	86321222	86323791	T5_H3K27ac_544
	chr1	18011030	18011275	RT4_K27ac_545		chr1	23155775	23156042	SW_K27ac_545		chr1	10697478	10697705	SC_K27ac_545		chr1	19587204	19587503	HT1376_K27ac_545		chr1	9221622	9224676	T1_H3K27ac_1_545		chr8	103422013	103425661	T3_H3K27ac_545		chr11	114270466	114271964	T4_H3K27ac_545		chr14	77923207	77925482	T5_H3K27ac_545
	chr1	18665473	18666554	RT4_K27ac_546		chr1	23156155	23156848	SW_K27ac_546		chr1	10704040	10704511	SC_K27ac_546		chr1	19638085	19639501	HT1376_K27ac_546		chr1	9225420	9225617	T1_H3K27ac_1_546		chr19	40925745	40932646	T3_H3K27ac_546		chr12	67661630	67664583	T4_H3K27ac_546		chr22	46408662	46411220	T5_H3K27ac_546
	chr1	18692193	18692905	RT4_K27ac_547		chr1	23158014	23158617	SW_K27ac_547		chr1	10704849	10705195	SC_K27ac_547		chr1	19663159	19663630	HT1376_K27ac_547		chr1	9240124	9240289	T1_H3K27ac_1_547		chr6	30522779	30525661	T3_H3K27ac_547		chr20	44599200	44601419	T4_H3K27ac_547		chr5	137877403	137880550	T5_H3K27ac_547
	chr1	18738948	18739597	RT4_K27ac_548		chr1	23158878	23159223	SW_K27ac_548		chr1	10745959	10746178	SC_K27ac_548		chr1	19669544	19669834	HT1376_K27ac_548		chr1	9240578	9243085	T1_H3K27ac_1_548		chr20	52824225	52825170	T3_H3K27ac_548		chr6	119215322	119217294	T4_H3K27ac_548		chr10	70090471	70093469	T5_H3K27ac_548
	chr1	18740311	18740639	RT4_K27ac_549		chr1	23310020	23310424	SW_K27ac_549		chr1	10753709	10754285	SC_K27ac_549		chr1	19766715	19767068	HT1376_K27ac_549		chr1	9256097	9256551	T1_H3K27ac_1_549		chr12	12509312	12512121	T3_H3K27ac_549		chr1	204484793	204487496	T4_H3K27ac_549		chr15	69108856	69114531	T5_H3K27ac_549
	chr1	18766650	18767184	RT4_K27ac_550		chr1	23310743	23311103	SW_K27ac_550		chr1	10784405	10784942	SC_K27ac_550		chr1	19811154	19812952	HT1376_K27ac_550		chr1	9277542	9277717	T1_H3K27ac_1_550		chr22	20861542	20865020	T3_H3K27ac_550		chr17	73177929	73180032	T4_H3K27ac_550		chr12	6872495	6878225	T5_H3K27ac_550
	chr1	18767352	18768042	RT4_K27ac_551		chr1	23330138	23330487	SW_K27ac_551		chr1	10838760	10839317	SC_K27ac_551		chr1	19922612	19924400	HT1376_K27ac_551		chr1	9294248	9295589	T1_H3K27ac_1_551		chr3	48506005	48512768	T3_H3K27ac_551		chr20	32698502	32701002	T4_H3K27ac_551		chr3	14219018	14220904	T5_H3K27ac_551
	chr1	18790458	18791653	RT4_K27ac_552		chr1	23336257	23337350	SW_K27ac_552		chr1	10839531	10840257	SC_K27ac_552		chr1	19932879	19933300	HT1376_K27ac_552		chr1	9297498	9297663	T1_H3K27ac_1_552		chr10	73609698	73611556	T3_H3K27ac_552		chr20	39657375	39658861	T4_H3K27ac_552		chr2	70140311	70141847	T5_H3K27ac_552
	chr1	18806555	18808309	RT4_K27ac_553		chr1	23337551	23338524	SW_K27ac_553		chr1	10853279	10853578	SC_K27ac_553		chr1	19970053	19970671	HT1376_K27ac_553		chr1	9299134	9299587	T1_H3K27ac_1_553		chr1	154191156	154194964	T3_H3K27ac_553		chr11	95521894	95524567	T4_H3K27ac_553		chr2	114647535	114650278	T5_H3K27ac_553
	chr1	18813661	18814149	RT4_K27ac_554		chr1	23345951	23347053	SW_K27ac_554		chr1	10853753	10854028	SC_K27ac_554		chr1	19970968	19971605	HT1376_K27ac_554		chr1	9299801	9300248	T1_H3K27ac_1_554		chr15	66083057	66085806	T3_H3K27ac_554		chr2	241499619	241502114	T4_H3K27ac_554		chr2	25193475	25195981	T5_H3K27ac_554
	chr1	18992746	18993131	RT4_K27ac_555		chr1	23493940	23494604	SW_K27ac_555		chr1	10862935	10863649	SC_K27ac_555		chr1	19980645	19981030	HT1376_K27ac_555		chr1	9300812	9301096	T1_H3K27ac_1_555		chr15	93350387	93355068	T3_H3K27ac_555		chr3	98240958	98241987	T4_H3K27ac_555		chr5	42948840	42952763	T5_H3K27ac_555
	chr1	18993299	18995222	RT4_K27ac_556		chr1	23494714	23495289	SW_K27ac_556		chr1	10863817	10865089	SC_K27ac_556		chr1	20125657	20127018	HT1376_K27ac_556		chr1	9302926	9303179	T1_H3K27ac_1_556		chr6	111802207	111806891	T3_H3K27ac_556		chr16	28934784	28937716	T4_H3K27ac_556		chr1	168147504	168149778	T5_H3K27ac_556
	chr1	18995502	18996243	RT4_K27ac_557		chr1	23514279	23516686	SW_K27ac_557		chr1	10884744	10885105	SC_K27ac_557		chr1	20208835	20209581	HT1376_K27ac_557		chr1	9303827	9304798	T1_H3K27ac_1_557		chr7	104581433	104587492	T3_H3K27ac_557		chr17	36955179	36956598	T4_H3K27ac_557		chr10	74054721	74058984	T5_H3K27ac_557
	chr1	18996905	18997193	RT4_K27ac_558		chr1	23521060	23521702	SW_K27ac_558		chr1	10890265	10890534	SC_K27ac_558		chr1	20229595	20230672	HT1376_K27ac_558		chr1	9342134	9342299	T1_H3K27ac_1_558		chr1	181057847	181060408	T3_H3K27ac_558		chr10	93169126	93170030	T4_H3K27ac_558		chr14	103056541	103058769	T5_H3K27ac_558
	chr1	19212605	19212902	RT4_K27ac_559		chr1	23521887	23524380	SW_K27ac_559		chr1	10890631	10890835	SC_K27ac_559		chr1	20245064	20245877	HT1376_K27ac_559		chr1	9342807	9343162	T1_H3K27ac_1_559		chr16	89938817	89941621	T3_H3K27ac_559		chr14	103850107	103854071	T4_H3K27ac_559		chr3	128900652	128903821	T5_H3K27ac_559
	chr1	19228720	19229830	RT4_K27ac_560		chr1	23669916	23670831	SW_K27ac_560		chr1	10895683	10895929	SC_K27ac_560		chr1	20275463	20275730	HT1376_K27ac_560		chr1	9349791	9349956	T1_H3K27ac_1_560		chr1	87169249	87172377	T3_H3K27ac_560		chr17	41444834	41447926	T4_H3K27ac_560		chr5	133705928	133708219	T5_H3K27ac_560
	chr1	19248935	19250204	RT4_K27ac_561		chr1	23671095	23671825	SW_K27ac_561		chr1	10950437	10950888	SC_K27ac_561		chr1	20296521	20297159	HT1376_K27ac_561		chr1	9350626	9350881	T1_H3K27ac_1_561		chr3	150320145	150322748	T3_H3K27ac_561		chr18	2570654	2572589	T4_H3K27ac_561		chr6	26171274	26173894	T5_H3K27ac_561
	chr1	19253363	19254046	RT4_K27ac_562		chr1	23694163	23694712	SW_K27ac_562		chr1	10951099	10951765	SC_K27ac_562		chr1	20297460	20297882	HT1376_K27ac_562		chr1	9351980	9352851	T1_H3K27ac_1_562		chr5	95995526	95999637	T3_H3K27ac_562		chr2	48131563	48134670	T4_H3K27ac_562		chr7	4722076	4725582	T5_H3K27ac_562
	chr1	19258702	19259687	RT4_K27ac_563		chr1	23695058	23698262	SW_K27ac_563		chr1	10957830	10963122	SC_K27ac_563		chr1	20301702	20302337	HT1376_K27ac_563		chr1	9353060	9354963	T1_H3K27ac_1_563		chr2	64368575	64372148	T3_H3K27ac_563		chr6	4017917	4020651	T4_H3K27ac_563		chr9	123637598	123641322	T5_H3K27ac_563
	chr1	19281905	19283098	RT4_K27ac_564		chr1	23703244	23703880	SW_K27ac_564		chr1	10967044	10967248	SC_K27ac_564		chr1	20436591	20437404	HT1376_K27ac_564		chr1	9359653	9359931	T1_H3K27ac_1_564		chr11	18414926	18418468	T3_H3K27ac_564		chr9	91932298	91934759	T4_H3K27ac_564		chr6	26121994	26127451	T5_H3K27ac_564
	chr1	19324535	19326115	RT4_K27ac_565		chr1	23728403	23728756	SW_K27ac_565		chr1	10980125	10980541	SC_K27ac_565		chr1	20450879	20451112	HT1376_K27ac_565		chr1	9360524	9361204	T1_H3K27ac_1_565		chr1	184722323	184725048	T3_H3K27ac_565		chr19	54973080	54976476	T4_H3K27ac_565		chr10	38145960	38147306	T5_H3K27ac_565
	chr1	19333930	19334560	RT4_K27ac_566		chr1	23728893	23729573	SW_K27ac_566		chr1	11001907	11002175	SC_K27ac_566		chr1	20478616	20480065	HT1376_K27ac_566		chr1	9362520	9363262	T1_H3K27ac_1_566		chr13	41236740	41241822	T3_H3K27ac_566		chr19	42773300	42776000	T4_H3K27ac_566		chr11	62606610	62610516	T5_H3K27ac_566
	chr1	19336074	19337707	RT4_K27ac_567		chr1	23730016	23730320	SW_K27ac_567		chr1	11025447	11025754	SC_K27ac_567		chr1	20480276	20481162	HT1376_K27ac_567		chr1	9364057	9364232	T1_H3K27ac_1_567		chr6	31238410	31241175	T3_H3K27ac_567		chr6	170151025	170152613	T4_H3K27ac_567		chr13	52025051	52027196	T5_H3K27ac_567
	chr1	19338179	19338678	RT4_K27ac_568		chr1	23804252	23804632	SW_K27ac_568		chr1	11071888	11073653	SC_K27ac_568		chr1	20492965	20493388	HT1376_K27ac_568		chr1	9374134	9374299	T1_H3K27ac_1_568		chr7	39987675	39992337	T3_H3K27ac_568		chr16	11833941	11837908	T4_H3K27ac_568		chr19	19778212	19781336	T5_H3K27ac_568
	chr1	19355858	19356306	RT4_K27ac_569		chr1	23880820	23881347	SW_K27ac_569		chr1	11118569	11119969	SC_K27ac_569		chr1	20511909	20513289	HT1376_K27ac_569		chr1	9376016	9377669	T1_H3K27ac_1_569		chr1	78443520	78446057	T3_H3K27ac_569		chr2	208393419	208396683	T4_H3K27ac_569		chr1	35656845	35658837	T5_H3K27ac_569
	chr1	19447693	19448133	RT4_K27ac_570		chr1	23882715	23883280	SW_K27ac_570		chr1	11120295	11120917	SC_K27ac_570		chr1	20537046	20539387	HT1376_K27ac_570		chr1	9378410	9378638	T1_H3K27ac_1_570		chr2	211032731	211037145	T3_H3K27ac_570		chr13	26795502	26796899	T4_H3K27ac_570		chr14	77491684	77501931	T5_H3K27ac_570
	chr1	19460223	19460958	RT4_K27ac_571		chr1	23883485	23884054	SW_K27ac_571		chr1	11159256	11160540	SC_K27ac_571		chr1	20558321	20560051	HT1376_K27ac_571		chr1	9379639	9379941	T1_H3K27ac_1_571		chr17	2293271	2311573	T3_H3K27ac_571		chr2	47401650	47404822	T4_H3K27ac_571		chr12	76422078	76427308	T5_H3K27ac_571
	chr1	19483284	19483462	RT4_K27ac_572		chr1	23884605	23885960	SW_K27ac_572		chr1	11321963	11322664	SC_K27ac_572		chr1	20606008	20606829	HT1376_K27ac_572		chr1	9380512	9380759	T1_H3K27ac_1_572		chr19	2269035	2272405	T3_H3K27ac_572		chr3	141456623	141459063	T4_H3K27ac_572		chr15	52121033	52123570	T5_H3K27ac_572
	chr1	19483825	19484597	RT4_K27ac_573		chr1	23886161	23886600	SW_K27ac_573		chr1	11322918	11323121	SC_K27ac_573		chr1	20681785	20682330	HT1376_K27ac_573		chr1	9381664	9382237	T1_H3K27ac_1_573		chr18	21032209	21035048	T3_H3K27ac_573		chr20	23341113	23343854	T4_H3K27ac_573		chr18	21164399	21167558	T5_H3K27ac_573
	chr1	19536088	19537898	RT4_K27ac_574		chr1	23888091	23888801	SW_K27ac_574		chr1	11333205	11334227	SC_K27ac_574		chr1	20682708	20683798	HT1376_K27ac_574		chr1	9385692	9386763	T1_H3K27ac_1_574		chr5	55287511	55291927	T3_H3K27ac_574		chr2	65454433	65456459	T4_H3K27ac_574		chr7	139024646	139027541	T5_H3K27ac_574
	chr1	19577686	19578986	RT4_K27ac_575		chr1	23904062	23904402	SW_K27ac_575		chr1	11538915	11539320	SC_K27ac_575		chr1	20688559	20689236	HT1376_K27ac_575		chr1	9392746	9393021	T1_H3K27ac_1_575		chr1	228352088	228355048	T3_H3K27ac_575		chr11	65478793	65480804	T4_H3K27ac_575		chr8	52809406	52813452	T5_H3K27ac_575
	chr1	19638015	19639278	RT4_K27ac_576		chr1	23911726	23912136	SW_K27ac_576		chr1	11712883	11713457	SC_K27ac_576		chr1	20802392	20804089	HT1376_K27ac_576		chr1	9398361	9398746	T1_H3K27ac_1_576		chr20	45975964	45991637	T3_H3K27ac_576		chr6	96968596	96970650	T4_H3K27ac_576		chr5	81266812	81268571	T5_H3K27ac_576
	chr1	19687825	19689454	RT4_K27ac_577		chr1	23912821	23913068	SW_K27ac_577		chr1	11713648	11714397	SC_K27ac_577		chr1	20810577	20813274	HT1376_K27ac_577		chr1	9400867	9401243	T1_H3K27ac_1_577		chr14	74352243	74355435	T3_H3K27ac_577		chr7	32929103	32933110	T4_H3K27ac_577		chr19	36629675	36632501	T5_H3K27ac_577
	chr1	19739176	19739470	RT4_K27ac_578		chr1	23918228	23918738	SW_K27ac_578		chr1	11714476	11714847	SC_K27ac_578		chr1	20820550	20822794	HT1376_K27ac_578		chr1	9406124	9406542	T1_H3K27ac_1_578		chr1	235489902	235493673	T3_H3K27ac_578		chr11	65429411	65431665	T4_H3K27ac_578		chr9	88966964	88971482	T5_H3K27ac_578
	chr1	19742458	19742715	RT4_K27ac_579		chr1	23918966	23919208	SW_K27ac_579		chr1	11715056	11715477	SC_K27ac_579		chr1	20823019	20823518	HT1376_K27ac_579		chr1	9409411	9409641	T1_H3K27ac_1_579		chr12	62995536	62998548	T3_H3K27ac_579		chr19	45255682	45258993	T4_H3K27ac_579		chr1	161367271	161370667	T5_H3K27ac_579
	chr1	19750893	19751954	RT4_K27ac_580		chr1	23919397	23920130	SW_K27ac_580		chr1	11740614	11741203	SC_K27ac_580		chr1	20833805	20835176	HT1376_K27ac_580		chr1	9410027	9410389	T1_H3K27ac_1_580		chr18	33708697	33710440	T3_H3K27ac_580		chr7	107203552	107204894	T4_H3K27ac_580		chr11	94276370	94279028	T5_H3K27ac_580
	chr1	19752479	19752978	RT4_K27ac_581		chr1	24018276	24019003	SW_K27ac_581		chr1	11779529	11779839	SC_K27ac_581		chr1	20857091	20858919	HT1376_K27ac_581		chr1	9431275	9431542	T1_H3K27ac_1_581		chr1	185124283	185127355	T3_H3K27ac_581		chr15	74907282	74909183	T4_H3K27ac_581		chr19	41280143	41285474	T5_H3K27ac_581
	chr1	19756896	19757388	RT4_K27ac_582		chr1	24069987	24070513	SW_K27ac_582		chr1	11795771	11797942	SC_K27ac_582		chr1	20929923	20930373	HT1376_K27ac_582		chr1	9435826	9436540	T1_H3K27ac_1_582		chr8	42994048	42997366	T3_H3K27ac_582		chr1	161283652	161284957	T4_H3K27ac_582		chr15	72765060	72768510	T5_H3K27ac_582
	chr1	19785351	19785640	RT4_K27ac_583		chr1	24104919	24105465	SW_K27ac_583		chr1	11850939	11851266	SC_K27ac_583		chr1	20938125	20938945	HT1376_K27ac_583		chr1	9437329	9437627	T1_H3K27ac_1_583		chr14	64967284	64975351	T3_H3K27ac_583		chr10	70090589	70093000	T4_H3K27ac_583		chr3	52320691	52322937	T5_H3K27ac_583
	chr1	19795090	19795838	RT4_K27ac_584		chr1	24116839	24117189	SW_K27ac_584		chr1	11863416	11863713	SC_K27ac_584		chr1	20939131	20940356	HT1376_K27ac_584		chr1	9445098	9445287	T1_H3K27ac_1_584		chr5	43120469	43122440	T3_H3K27ac_584		chr11	46637816	46640032	T4_H3K27ac_584		chr9	91932789	91934705	T5_H3K27ac_584
	chr1	19796084	19796482	RT4_K27ac_585		chr1	24117406	24117945	SW_K27ac_585		chr1	11864469	11864876	SC_K27ac_585		chr1	20940730	20941102	HT1376_K27ac_585		chr1	9460372	9460565	T1_H3K27ac_1_585		chr3	98240652	98242483	T3_H3K27ac_585		chr5	178053076	178054523	T4_H3K27ac_585		chr6	149637539	149641625	T5_H3K27ac_585
	chr1	19811341	19812071	RT4_K27ac_586		chr1	24118056	24118298	SW_K27ac_586		chr1	11864971	11866047	SC_K27ac_586		chr1	20959901	20960447	HT1376_K27ac_586		chr1	9460943	9461123	T1_H3K27ac_1_586		chr12	89743191	89749219	T3_H3K27ac_586		chr6	86351005	86354892	T4_H3K27ac_586		chr20	32579665	32583846	T5_H3K27ac_586
	chr1	19812224	19813052	RT4_K27ac_587		chr1	24125518	24125960	SW_K27ac_587		chr1	11866171	11867044	SC_K27ac_587		chr1	20965854	20966444	HT1376_K27ac_587		chr1	9467586	9467830	T1_H3K27ac_1_587		chr13	21633825	21636514	T3_H3K27ac_587		chr8	124780289	124781778	T4_H3K27ac_587		chr14	69280245	69284105	T5_H3K27ac_587
	chr1	19852103	19852983	RT4_K27ac_588		chr1	24126146	24127303	SW_K27ac_588		chr1	11881136	11881732	SC_K27ac_588		chr1	20976646	20976926	HT1376_K27ac_588		chr1	9472064	9474247	T1_H3K27ac_1_588		chr14	100703964	100709181	T3_H3K27ac_588		chr12	22777634	22779728	T4_H3K27ac_588		chr9	74381081	74385158	T5_H3K27ac_588
	chr1	19922784	19924240	RT4_K27ac_589		chr1	24127424	24127846	SW_K27ac_589		chr1	11881927	11882173	SC_K27ac_589		chr1	20987210	20988782	HT1376_K27ac_589		chr1	9474513	9475140	T1_H3K27ac_1_589		chr14	45365411	45367660	T3_H3K27ac_589		chr8	37755049	37757076	T4_H3K27ac_589		chr6	34190889	34192743	T5_H3K27ac_589
	chr1	19971033	19971805	RT4_K27ac_590		chr1	24151399	24152169	SW_K27ac_590		chr1	11967169	11967513	SC_K27ac_590		chr1	21023101	21023938	HT1376_K27ac_590		chr1	9476966	9477316	T1_H3K27ac_1_590		chr14	81685365	81688358	T3_H3K27ac_590		chr16	75680832	75683835	T4_H3K27ac_590		chr2	160566704	160570712	T5_H3K27ac_590
	chr1	20091506	20093239	RT4_K27ac_591		chr1	24191748	24192028	SW_K27ac_591		chr1	11967863	11970344	SC_K27ac_591		chr1	21044061	21045153	HT1376_K27ac_591		chr1	9485700	9486465	T1_H3K27ac_1_591		chr21	38443716	38447120	T3_H3K27ac_591		chr12	133656194	133658192	T4_H3K27ac_591		chr20	30305414	30311817	T5_H3K27ac_591
	chr1	20113497	20114058	RT4_K27ac_592		chr1	24194389	24194791	SW_K27ac_592		chr1	11984908	11985274	SC_K27ac_592		chr1	21058771	21060502	HT1376_K27ac_592		chr1	9486627	9486978	T1_H3K27ac_1_592		chr8	94751546	94754074	T3_H3K27ac_592		chr19	48972394	48973986	T4_H3K27ac_592		chr6	18262710	18266105	T5_H3K27ac_592
	chr1	20125559	20127055	RT4_K27ac_593		chr1	24278602	24278930	SW_K27ac_593		chr1	11986578	11986923	SC_K27ac_593		chr1	21065359	21066778	HT1376_K27ac_593		chr1	9488140	9489425	T1_H3K27ac_1_593		chr7	127031592	127034033	T3_H3K27ac_593		chr6	138425441	138429931	T4_H3K27ac_593		chr1	154933294	154935288	T5_H3K27ac_593
	chr1	20132032	20132352	RT4_K27ac_594		chr1	24285322	24286122	SW_K27ac_594		chr1	11989589	11990837	SC_K27ac_594		chr1	21066948	21067241	HT1376_K27ac_594		chr1	9495429	9495821	T1_H3K27ac_1_594		chr10	76870007	76872889	T3_H3K27ac_594		chr19	55918322	55920262	T4_H3K27ac_594		chr12	52537713	52549384	T5_H3K27ac_594
	chr1	20141487	20142594	RT4_K27ac_595		chr1	24286292	24287162	SW_K27ac_595		chr1	11993939	11994667	SC_K27ac_595		chr1	21112467	21114468	HT1376_K27ac_595		chr1	9498204	9498388	T1_H3K27ac_1_595		chr1	157106709	157109843	T3_H3K27ac_595		chr17	3538840	3540445	T4_H3K27ac_595		chr21	34602038	34605125	T5_H3K27ac_595
	chr1	20173171	20173470	RT4_K27ac_596		chr1	24306133	24306939	SW_K27ac_596		chr1	11994745	11995491	SC_K27ac_596		chr1	21193676	21194054	HT1376_K27ac_596		chr1	9499137	9499407	T1_H3K27ac_1_596		chr11	62606473	62610594	T3_H3K27ac_596		chr1	156467901	156475981	T4_H3K27ac_596		chr21	42790742	42794987	T5_H3K27ac_596
	chr1	20208787	20209904	RT4_K27ac_597		chr1	24307091	24308161	SW_K27ac_597		chr1	12026865	12027631	SC_K27ac_597		chr1	21348031	21348413	HT1376_K27ac_597		chr1	9504007	9504192	T1_H3K27ac_1_597		chr13	26795363	26797313	T3_H3K27ac_597		chr14	21735476	21737687	T4_H3K27ac_597		chr2	20549289	20551927	T5_H3K27ac_597
	chr1	20251192	20252847	RT4_K27ac_598		chr1	24345073	24345360	SW_K27ac_598		chr1	12039382	12039899	SC_K27ac_598		chr1	21348809	21349435	HT1376_K27ac_598		chr1	9504763	9504928	T1_H3K27ac_1_598		chr2	88925472	88929013	T3_H3K27ac_598		chr17	57912517	57921475	T4_H3K27ac_598		chr3	87275665	87277634	T5_H3K27ac_598
	chr1	20280530	20280882	RT4_K27ac_599		chr1	24345633	24346472	SW_K27ac_599		chr1	12040067	12041887	SC_K27ac_599		chr1	21349802	21350969	HT1376_K27ac_599		chr1	9508581	9508936	T1_H3K27ac_1_599		chr2	99223917	99226531	T3_H3K27ac_599		chr17	79827143	79830334	T4_H3K27ac_599		chr6	134494453	134498251	T5_H3K27ac_599
	chr1	20301772	20303485	RT4_K27ac_600		chr1	24348271	24349233	SW_K27ac_600		chr1	12042134	12042922	SC_K27ac_600		chr1	21361910	21362126	HT1376_K27ac_600		chr1	9509558	9510131	T1_H3K27ac_1_600		chr5	61698890	61700723	T3_H3K27ac_600		chr1	16009553	16011829	T4_H3K27ac_600		chr8	124718003	124722265	T5_H3K27ac_600
	chr1	20307715	20308993	RT4_K27ac_601		chr1	24435632	24435873	SW_K27ac_601		chr1	12044694	12044915	SC_K27ac_601		chr1	21388309	21388802	HT1376_K27ac_601		chr1	9510867	9511118	T1_H3K27ac_1_601		chr14	74248464	74257947	T3_H3K27ac_601		chr13	20531429	20532694	T4_H3K27ac_601		chr4	103421654	103424144	T5_H3K27ac_601
	chr1	20385038	20385493	RT4_K27ac_602		chr1	24444625	24445415	SW_K27ac_602		chr1	12060919	12062375	SC_K27ac_602		chr1	21417620	21418076	HT1376_K27ac_602		chr1	9599024	9599222	T1_H3K27ac_1_602		chr2	47400024	47404791	T3_H3K27ac_602		chr20	2082406	2084239	T4_H3K27ac_602		chr2	203129241	203133350	T5_H3K27ac_602
	chr1	20427767	20428404	RT4_K27ac_603		chr1	24476744	24477103	SW_K27ac_603		chr1	12074639	12075074	SC_K27ac_603		chr1	21475372	21475616	HT1376_K27ac_603		chr1	9599548	9600286	T1_H3K27ac_1_603		chr2	232466144	232471264	T3_H3K27ac_603		chr21	38638899	38640966	T4_H3K27ac_603		chr12	31670179	31674123	T5_H3K27ac_603
	chr1	20429922	20430296	RT4_K27ac_604		chr1	24477240	24477733	SW_K27ac_604		chr1	12075395	12075593	SC_K27ac_604		chr1	21475978	21476856	HT1376_K27ac_604		chr1	9648897	9649130	T1_H3K27ac_1_604		chr1	53661313	53664648	T3_H3K27ac_604		chr3	37033066	37036023	T4_H3K27ac_604		chr5	36875048	36879121	T5_H3K27ac_604
	chr1	20431904	20432170	RT4_K27ac_605		chr1	24478157	24478588	SW_K27ac_605		chr1	12079085	12079295	SC_K27ac_605		chr1	21501746	21503413	HT1376_K27ac_605		chr1	9653237	9653437	T1_H3K27ac_1_605		chr17	57695224	57698681	T3_H3K27ac_605		chr5	43017159	43021823	T4_H3K27ac_605		chr6	36643968	36652338	T5_H3K27ac_605
	chr1	20463718	20465604	RT4_K27ac_606		chr1	24513270	24513748	SW_K27ac_606		chr1	12079515	12080233	SC_K27ac_606		chr1	21503582	21503849	HT1376_K27ac_606		chr1	9666019	9666184	T1_H3K27ac_1_606		chr6	127587290	127589809	T3_H3K27ac_606		chr14	35590183	35592541	T4_H3K27ac_606		chr10	43930836	43933698	T5_H3K27ac_606
	chr1	20465809	20466645	RT4_K27ac_607		chr1	24513963	24514376	SW_K27ac_607		chr1	12089865	12090125	SC_K27ac_607		chr1	21564350	21565037	HT1376_K27ac_607		chr1	9687253	9687522	T1_H3K27ac_1_607		chr19	3403120	3406528	T3_H3K27ac_607		chr1	161086911	161089363	T4_H3K27ac_607		chr2	128164327	128166909	T5_H3K27ac_607
	chr1	20478104	20478912	RT4_K27ac_608		chr1	24562592	24562762	SW_K27ac_608		chr1	12112289	12112609	SC_K27ac_608		chr1	21577593	21579530	HT1376_K27ac_608		chr1	9688750	9689191	T1_H3K27ac_1_608		chr19	4057072	4065890	T3_H3K27ac_608		chr2	69968036	69969902	T4_H3K27ac_608		chr22	46462433	46471606	T5_H3K27ac_608
	chr1	20479384	20479618	RT4_K27ac_609		chr1	24562883	24563291	SW_K27ac_609		chr1	12192577	12193113	SC_K27ac_609		chr1	21587707	21589610	HT1376_K27ac_609		chr1	9689362	9689849	T1_H3K27ac_1_609		chr2	74055321	74057224	T3_H3K27ac_609		chr3	155571145	155573480	T4_H3K27ac_609		chr3	81809196	81811648	T5_H3K27ac_609
	chr1	20497190	20498176	RT4_K27ac_610		chr1	24563544	24564078	SW_K27ac_610		chr1	12203367	12203773	SC_K27ac_610		chr1	21629068	21629302	HT1376_K27ac_610		chr1	9690008	9690474	T1_H3K27ac_1_610		chr22	31680381	31690674	T3_H3K27ac_610		chr19	15488879	15491513	T4_H3K27ac_610		chr5	171431801	171434595	T5_H3K27ac_610
	chr1	20506363	20507461	RT4_K27ac_611		chr1	24593479	24593893	SW_K27ac_611		chr1	12204118	12204530	SC_K27ac_611		chr1	21650484	21652144	HT1376_K27ac_611		chr1	9711110	9712523	T1_H3K27ac_1_611		chr1	62901044	62903948	T3_H3K27ac_611		chr11	85776371	85781630	T4_H3K27ac_611		chr9	27570489	27574689	T5_H3K27ac_611
	chr1	20513472	20514064	RT4_K27ac_612		chr1	24610093	24610349	SW_K27ac_612		chr1	12290113	12291511	SC_K27ac_612		chr1	21656243	21656513	HT1376_K27ac_612		chr1	9712714	9713714	T1_H3K27ac_1_612		chr9	136005291	136014110	T3_H3K27ac_612		chr1	205717622	205719452	T4_H3K27ac_612		chr10	73974857	73977399	T5_H3K27ac_612
	chr1	20525431	20526903	RT4_K27ac_613		chr1	24610531	24612596	SW_K27ac_613		chr1	12445901	12447331	SC_K27ac_613		chr1	21671343	21672413	HT1376_K27ac_613		chr1	9714000	9714532	T1_H3K27ac_1_613		chr5	42990073	42995985	T3_H3K27ac_613		chr16	69597791	69601658	T4_H3K27ac_613		chr1	145451437	145458243	T5_H3K27ac_613
	chr1	20537314	20539404	RT4_K27ac_614		chr1	24613290	24613709	SW_K27ac_614		chr1	12465229	12465912	SC_K27ac_614		chr1	21754037	21754302	HT1376_K27ac_614		chr1	9724930	9725227	T1_H3K27ac_1_614		chr7	1014284	1015323	T3_H3K27ac_614		chr1	70686271	70688103	T4_H3K27ac_614		chr19	8455155	8455712	T5_H3K27ac_614
	chr1	20539612	20540063	RT4_K27ac_615		chr1	24643409	24643659	SW_K27ac_615		chr1	12466621	12467296	SC_K27ac_615		chr1	21766110	21767145	HT1376_K27ac_615		chr1	9747909	9748439	T1_H3K27ac_1_615		chr20	39657364	39659590	T3_H3K27ac_615		chr7	7220902	7223844	T4_H3K27ac_615		chr7	75986360	75990201	T5_H3K27ac_615
	chr1	20558396	20559937	RT4_K27ac_616		chr1	24645867	24647300	SW_K27ac_616		chr1	12467884	12468244	SC_K27ac_616		chr1	21940717	21941777	HT1376_K27ac_616		chr1	9776579	9777699	T1_H3K27ac_1_616		chr16	1358583	1360777	T3_H3K27ac_616		chr1	11071948	11073465	T4_H3K27ac_616		chr16	11677640	11681886	T5_H3K27ac_616
	chr1	20575354	20578020	RT4_K27ac_617		chr1	24647812	24648878	SW_K27ac_617		chr1	12493017	12495183	SC_K27ac_617		chr1	21952668	21954483	HT1376_K27ac_617		chr1	9777923	9778761	T1_H3K27ac_1_617		chr1	36619722	36629160	T3_H3K27ac_617		chr10	97889240	97890642	T4_H3K27ac_617		chr17	1619866	1622307	T5_H3K27ac_617
	chr1	20591789	20593665	RT4_K27ac_618		chr1	24649040	24649391	SW_K27ac_618		chr1	12495564	12495804	SC_K27ac_618		chr1	21958960	21959210	HT1376_K27ac_618		chr1	9779121	9779286	T1_H3K27ac_1_618		chr1	202926412	202927817	T3_H3K27ac_618		chr5	138677304	138678669	T4_H3K27ac_618		chr17	66507584	66510416	T5_H3K27ac_618
	chr1	20593971	20594220	RT4_K27ac_619		chr1	24690948	24691760	SW_K27ac_619		chr1	12496035	12499127	SC_K27ac_619		chr1	21964770	21965136	HT1376_K27ac_619		chr1	9787489	9787718	T1_H3K27ac_1_619		chr4	37685881	37689123	T3_H3K27ac_619		chr19	59068344	59071590	T4_H3K27ac_619		chr9	136240948	136243689	T5_H3K27ac_619
	chr1	20606224	20606838	RT4_K27ac_620		chr1	24692002	24692576	SW_K27ac_620		chr1	12499260	12499773	SC_K27ac_620		chr1	21965323	21966243	HT1376_K27ac_620		chr1	9788583	9788813	T1_H3K27ac_1_620		chr10	43931148	43934022	T3_H3K27ac_620		chr6	3067912	3069728	T4_H3K27ac_620		chr5	131744811	131751830	T5_H3K27ac_620
	chr1	20681580	20683909	RT4_K27ac_621		chr1	24699862	24700664	SW_K27ac_621		chr1	12514525	12515052	SC_K27ac_621		chr1	21979528	21979861	HT1376_K27ac_621		chr1	9788983	9789229	T1_H3K27ac_1_621		chr10	72163315	72167062	T3_H3K27ac_621		chr3	39192059	39196033	T4_H3K27ac_621		chr6	136608967	136612623	T5_H3K27ac_621
	chr1	20688628	20688855	RT4_K27ac_622		chr1	24700829	24702861	SW_K27ac_622		chr1	12515170	12515518	SC_K27ac_622		chr1	22056740	22057574	HT1376_K27ac_622		chr1	9844490	9844731	T1_H3K27ac_1_622		chr12	46119785	46126523	T3_H3K27ac_622		chr4	40057055	40060212	T4_H3K27ac_622		chr16	11835139	11838138	T5_H3K27ac_622
	chr1	20770889	20771195	RT4_K27ac_623		chr1	24707026	24707727	SW_K27ac_623		chr1	12516000	12516895	SC_K27ac_623		chr1	22075691	22076171	HT1376_K27ac_623		chr1	9847575	9847744	T1_H3K27ac_1_623		chr11	117048237	117051295	T3_H3K27ac_623		chr19	39880609	39881835	T4_H3K27ac_623		chr19	19302296	19304308	T5_H3K27ac_623
	chr1	20802716	20803026	RT4_K27ac_624		chr1	24710457	24710795	SW_K27ac_624		chr1	12523939	12525461	SC_K27ac_624		chr1	22091699	22092093	HT1376_K27ac_624		chr1	9882934	9884024	T1_H3K27ac_1_624		chr21	40175838	40183219	T3_H3K27ac_624		chr17	63050435	63055322	T4_H3K27ac_624		chr8	103816124	103823569	T5_H3K27ac_624
	chr1	20810510	20813225	RT4_K27ac_625		chr1	24711149	24711900	SW_K27ac_625		chr1	12535465	12535911	SC_K27ac_625		chr1	22108680	22109481	HT1376_K27ac_625		chr1	9884301	9884626	T1_H3K27ac_1_625		chr2	61107123	61110828	T3_H3K27ac_625		chr6	10409271	10415262	T4_H3K27ac_625		chr18	3592142	3598199	T5_H3K27ac_625
	chr1	20820705	20821016	RT4_K27ac_626		chr1	24738159	24738441	SW_K27ac_626		chr1	12536069	12536466	SC_K27ac_626		chr1	22109638	22110199	HT1376_K27ac_626		chr1	9884942	9885624	T1_H3K27ac_1_626		chr6	30581938	30587049	T3_H3K27ac_626		chr7	139024621	139027468	T4_H3K27ac_626		chr22	32869893	32873139	T5_H3K27ac_626
	chr1	20821937	20822856	RT4_K27ac_627		chr1	24739662	24740288	SW_K27ac_627		chr1	12537111	12542352	SC_K27ac_627		chr1	22114760	22115294	HT1376_K27ac_627		chr1	9885815	9886008	T1_H3K27ac_1_627		chr9	33157819	33168854	T3_H3K27ac_627		chr1	85038232	85040601	T4_H3K27ac_627		chr19	57789257	57793137	T5_H3K27ac_627
	chr1	20823059	20823545	RT4_K27ac_628		chr1	24743014	24743453	SW_K27ac_628		chr1	12601382	12602048	SC_K27ac_628		chr1	22196523	22196919	HT1376_K27ac_628		chr1	9895570	9896401	T1_H3K27ac_1_628		chr7	25163351	25165793	T3_H3K27ac_628		chr2	219153364	219157505	T4_H3K27ac_628		chr16	50775913	50778842	T5_H3K27ac_628
	chr1	20834086	20834956	RT4_K27ac_629		chr1	24744108	24744420	SW_K27ac_629		chr1	12608189	12611021	SC_K27ac_629		chr1	22197269	22197602	HT1376_K27ac_629		chr1	9937690	9938000	T1_H3K27ac_1_629		chr9	88896534	88898436	T3_H3K27ac_629		chr20	44992199	44993313	T4_H3K27ac_629		chr20	49545646	49548901	T5_H3K27ac_629
	chr1	20940103	20940799	RT4_K27ac_630		chr1	24744823	24745338	SW_K27ac_630		chr1	12613486	12613960	SC_K27ac_630		chr1	22238052	22238380	HT1376_K27ac_630		chr1	9938572	9938912	T1_H3K27ac_1_630		chr17	3538790	3540613	T3_H3K27ac_630		chr1	6658430	6665101	T4_H3K27ac_630		chr2	240322975	240323987	T5_H3K27ac_630
	chr1	20959916	20960937	RT4_K27ac_631		chr1	24745479	24745651	SW_K27ac_631		chr1	12616312	12617026	SC_K27ac_631		chr1	22257787	22258498	HT1376_K27ac_631		chr1	9949393	9949872	T1_H3K27ac_1_631		chr3	38205211	38208110	T3_H3K27ac_631		chr2	99224495	99225887	T4_H3K27ac_631		chr5	43039313	43043667	T5_H3K27ac_631
	chr1	20987040	20988600	RT4_K27ac_632		chr1	24745784	24746244	SW_K27ac_632		chr1	12617856	12618160	SC_K27ac_632		chr1	22262502	22263591	HT1376_K27ac_632		chr1	9950068	9950443	T1_H3K27ac_1_632		chr7	5594040	5598612	T3_H3K27ac_632		chr11	67069196	67073211	T4_H3K27ac_632		chr17	7743567	7748972	T5_H3K27ac_632
	chr1	21023079	21023845	RT4_K27ac_633		chr1	24828492	24829574	SW_K27ac_633		chr1	12632944	12635109	SC_K27ac_633		chr1	22263995	22264353	HT1376_K27ac_633		chr1	9950617	9951049	T1_H3K27ac_1_633		chr7	55432566	55434925	T3_H3K27ac_633		chr10	123733735	123735150	T4_H3K27ac_633		chr20	35917398	35919283	T5_H3K27ac_633
	chr1	21058920	21060551	RT4_K27ac_634		chr1	24968950	24969445	SW_K27ac_634		chr1	12647727	12648316	SC_K27ac_634		chr1	22264899	22266197	HT1376_K27ac_634		chr1	9952516	9952775	T1_H3K27ac_1_634		chr12	6641104	6647636	T3_H3K27ac_634		chr13	29232282	29234614	T4_H3K27ac_634		chr12	2985120	2987638	T5_H3K27ac_634
	chr1	21112570	21114317	RT4_K27ac_635		chr1	24969796	24970675	SW_K27ac_635		chr1	12648627	12649239	SC_K27ac_635		chr1	22281956	22284495	HT1376_K27ac_635		chr1	9952947	9953415	T1_H3K27ac_1_635		chr10	104401121	104408465	T3_H3K27ac_635		chr1	87169396	87172019	T4_H3K27ac_635		chr12	69003666	69007237	T5_H3K27ac_635
	chr1	21291093	21291929	RT4_K27ac_636		chr1	25051173	25051435	SW_K27ac_636		chr1	12652508	12652707	SC_K27ac_636		chr1	22290090	22290581	HT1376_K27ac_636		chr1	9953604	9953870	T1_H3K27ac_1_636		chr2	157187960	157192914	T3_H3K27ac_636		chr1	224032238	224034678	T4_H3K27ac_636		chr1	93810525	93813380	T5_H3K27ac_636
	chr1	21348824	21350150	RT4_K27ac_637		chr1	25069136	25069599	SW_K27ac_637		chr1	12652847	12654487	SC_K27ac_637		chr1	22301068	22301830	HT1376_K27ac_637		chr1	9960194	9960604	T1_H3K27ac_1_637		chr12	122905138	122908640	T3_H3K27ac_637		chr17	57695450	57698810	T4_H3K27ac_637		chr1	59010958	59012882	T5_H3K27ac_637
	chr1	21502036	21502892	RT4_K27ac_638		chr1	25071997	25072901	SW_K27ac_638		chr1	12654640	12657228	SC_K27ac_638		chr1	22351584	22353038	HT1376_K27ac_638		chr1	9969864	9970218	T1_H3K27ac_1_638		chr1	224031683	224035587	T3_H3K27ac_638		chr3	194304131	194305356	T4_H3K27ac_638		chr14	21148629	21153737	T5_H3K27ac_638
	chr1	21503115	21503735	RT4_K27ac_639		chr1	25566439	25566802	SW_K27ac_639		chr1	12657306	12658386	SC_K27ac_639		chr1	22369454	22370334	HT1376_K27ac_639		chr1	9970732	9971640	T1_H3K27ac_1_639		chr2	179314336	179317340	T3_H3K27ac_639		chr20	46129916	46132496	T4_H3K27ac_639		chr1	114470614	114474741	T5_H3K27ac_639
	chr1	21578018	21579264	RT4_K27ac_640		chr1	25572932	25573960	SW_K27ac_640		chr1	12659036	12659388	SC_K27ac_640		chr1	22379158	22380241	HT1376_K27ac_640		chr1	10002637	10004243	T1_H3K27ac_1_640		chr8	12610037	12616395	T3_H3K27ac_640		chr19	36248885	36249711	T4_H3K27ac_640		chr2	65454209	65456891	T5_H3K27ac_640
	chr1	21587858	21589200	RT4_K27ac_641		chr1	25664913	25665360	SW_K27ac_641		chr1	12662231	12663274	SC_K27ac_641		chr1	22385046	22385340	HT1376_K27ac_641		chr1	10008262	10008435	T1_H3K27ac_1_641		chr12	57079613	57083345	T3_H3K27ac_641		chr2	20549580	20551863	T4_H3K27ac_641		chr1	174967065	174970461	T5_H3K27ac_641
	chr1	21616623	21617184	RT4_K27ac_642		chr1	25756841	25757117	SW_K27ac_642		chr1	12663466	12664500	SC_K27ac_642		chr1	22396232	22396709	HT1376_K27ac_642		chr1	10010163	10010329	T1_H3K27ac_1_642		chr17	8060094	8063249	T3_H3K27ac_642		chr13	52376804	52378786	T4_H3K27ac_642		chr17	56083580	56086168	T5_H3K27ac_642
	chr1	21650571	21652189	RT4_K27ac_643		chr1	25757477	25757769	SW_K27ac_643		chr1	12664595	12664916	SC_K27ac_643		chr1	22397067	22397299	HT1376_K27ac_643		chr1	10022895	10023060	T1_H3K27ac_1_643		chr17	38689883	38701465	T3_H3K27ac_643		chr14	102552312	102555141	T4_H3K27ac_643		chr20	2450222	2452353	T5_H3K27ac_643
	chr1	21655966	21656610	RT4_K27ac_644		chr1	25895100	25895564	SW_K27ac_644		chr1	12675418	12679974	SC_K27ac_644		chr1	22468867	22469207	HT1376_K27ac_644		chr1	10047111	10047456	T1_H3K27ac_1_644		chr3	196466459	196468924	T3_H3K27ac_644		chr19	1652585	1653823	T4_H3K27ac_644		chr16	28833585	28836397	T5_H3K27ac_644
	chr1	21671416	21672457	RT4_K27ac_645		chr1	26146459	26147229	SW_K27ac_645		chr1	12680659	12681056	SC_K27ac_645		chr1	22555706	22555989	HT1376_K27ac_645		chr1	10062640	10062805	T1_H3K27ac_1_645		chr13	49549166	49551777	T3_H3K27ac_645		chr5	148927363	148931805	T4_H3K27ac_645		chr20	42836140	42841017	T5_H3K27ac_645
	chr1	21692999	21693441	RT4_K27ac_646		chr1	26185461	26185841	SW_K27ac_646		chr1	12805153	12805391	SC_K27ac_646		chr1	22601289	22601809	HT1376_K27ac_646		chr1	10092181	10092572	T1_H3K27ac_1_646		chr1	36848417	36856132	T3_H3K27ac_646		chr7	35839578	35841972	T4_H3K27ac_646		chr5	142781037	142785633	T5_H3K27ac_646
	chr1	21766103	21766519	RT4_K27ac_647		chr1	26201621	26202058	SW_K27ac_647		chr1	12911607	12912304	SC_K27ac_647		chr1	22601978	22602433	HT1376_K27ac_647		chr1	10092963	10094058	T1_H3K27ac_1_647		chr15	72518296	72525625	T3_H3K27ac_647		chr11	67034093	67037850	T4_H3K27ac_647		chr17	45265488	45267368	T5_H3K27ac_647
	chr1	21766706	21767323	RT4_K27ac_648		chr1	26202232	26202731	SW_K27ac_648		chr1	13910141	13911226	SC_K27ac_648		chr1	22661799	22662078	HT1376_K27ac_648		chr1	10095227	10095392	T1_H3K27ac_1_648		chr2	239193525	239198806	T3_H3K27ac_648		chr13	115045936	115048308	T4_H3K27ac_648		chr2	27433198	27436362	T5_H3K27ac_648
	chr1	21779906	21781088	RT4_K27ac_649		chr1	26216334	26216986	SW_K27ac_649		chr1	13913293	13913601	SC_K27ac_649		chr1	22738559	22739193	HT1376_K27ac_649		chr1	10097847	10098035	T1_H3K27ac_1_649		chr5	68664281	68666693	T3_H3K27ac_649		chr15	44037823	44039722	T4_H3K27ac_649		chr20	1305487	1307469	T5_H3K27ac_649
	chr1	21860707	21861501	RT4_K27ac_650		chr1	26217341	26217715	SW_K27ac_650		chr1	13913992	13914871	SC_K27ac_650		chr1	22739457	22740045	HT1376_K27ac_650		chr1	10106309	10106474	T1_H3K27ac_1_650		chr8	53625714	53627698	T3_H3K27ac_650		chr2	74153398	74155065	T4_H3K27ac_650		chr3	129343099	129347620	T5_H3K27ac_650
	chr1	21918586	21918943	RT4_K27ac_651		chr1	26218260	26218500	SW_K27ac_651		chr1	13931284	13931696	SC_K27ac_651		chr1	22755387	22755907	HT1376_K27ac_651		chr1	10125078	10125541	T1_H3K27ac_1_651		chr3	151984009	151991970	T3_H3K27ac_651		chr2	220040341	220043587	T4_H3K27ac_651		chr19	45255433	45260525	T5_H3K27ac_651
	chr1	21940638	21941668	RT4_K27ac_652		chr1	26219064	26219446	SW_K27ac_652		chr1	14010972	14011792	SC_K27ac_652		chr1	22777749	22778223	HT1376_K27ac_652		chr1	10126228	10126477	T1_H3K27ac_1_652		chr1	89355892	89358110	T3_H3K27ac_652		chr7	134853608	134856104	T4_H3K27ac_652		chr1	114300517	114303094	T5_H3K27ac_652
	chr1	21949406	21950278	RT4_K27ac_653		chr1	26362067	26362550	SW_K27ac_653		chr1	14026076	14027303	SC_K27ac_653		chr1	22778387	22779183	HT1376_K27ac_653		chr1	10126654	10127336	T1_H3K27ac_1_653		chr9	26946399	26947860	T3_H3K27ac_653		chr1	67395491	67397642	T4_H3K27ac_653		chr17	58601942	58604131	T5_H3K27ac_653
	chr1	21950512	21950969	RT4_K27ac_654		chr1	26362695	26363190	SW_K27ac_654		chr1	14075183	14075710	SC_K27ac_654		chr1	22798913	22799330	HT1376_K27ac_654		chr1	10145872	10146252	T1_H3K27ac_1_654		chr7	100270675	100274292	T3_H3K27ac_654		chr12	6641160	6645735	T4_H3K27ac_654		chr19	47633827	47635731	T5_H3K27ac_654
	chr1	21952788	21954342	RT4_K27ac_655		chr1	26363320	26363660	SW_K27ac_655		chr1	14076090	14076792	SC_K27ac_655		chr1	23157828	23158660	HT1376_K27ac_655		chr1	10167717	10167954	T1_H3K27ac_1_655		chr7	2393332	2395588	T3_H3K27ac_655		chr14	68140817	68142036	T4_H3K27ac_655		chr4	56411612	56414317	T5_H3K27ac_655
	chr1	21964581	21965932	RT4_K27ac_656		chr1	26363934	26365466	SW_K27ac_656		chr1	14084585	14085244	SC_K27ac_656		chr1	23158832	23159135	HT1376_K27ac_656		chr1	10175232	10175518	T1_H3K27ac_1_656		chr11	503505	508018	T3_H3K27ac_656		chr16	30387842	30390651	T4_H3K27ac_656		chr19	50879155	50880586	T5_H3K27ac_656
	chr1	21973642	21973987	RT4_K27ac_657		chr1	26405448	26406179	SW_K27ac_657		chr1	14085823	14086566	SC_K27ac_657		chr1	23345474	23346965	HT1376_K27ac_657		chr1	10269877	10272568	T1_H3K27ac_1_657		chr11	71747559	71755352	T3_H3K27ac_657		chr17	73778589	73783191	T4_H3K27ac_657		chr5	180256443	180260004	T5_H3K27ac_657
	chr1	22002635	22003052	RT4_K27ac_658		chr1	26409990	26410282	SW_K27ac_658		chr1	14086672	14087218	SC_K27ac_658		chr1	23435787	23436138	HT1376_K27ac_658		chr1	10291965	10292134	T1_H3K27ac_1_658		chr19	3983704	3985572	T3_H3K27ac_658		chr3	187457534	187465024	T4_H3K27ac_658		chr12	64844780	64847281	T5_H3K27ac_658
	chr1	22003562	22003872	RT4_K27ac_659		chr1	26420372	26420858	SW_K27ac_659		chr1	14093779	14094409	SC_K27ac_659		chr1	23493713	23495390	HT1376_K27ac_659		chr1	10346315	10346485	T1_H3K27ac_1_659		chr4	78738521	78744417	T3_H3K27ac_659		chr12	49523967	49526345	T4_H3K27ac_659		chr3	105584504	105589398	T5_H3K27ac_659
	chr1	22100200	22100473	RT4_K27ac_660		chr1	26437287	26438081	SW_K27ac_660		chr1	14126798	14127810	SC_K27ac_660		chr1	23504105	23504495	HT1376_K27ac_660		chr1	10390705	10390928	T1_H3K27ac_1_660		chr20	44991728	44993388	T3_H3K27ac_660		chr17	30676270	30677964	T4_H3K27ac_660		chr5	98262620	98266726	T5_H3K27ac_660
	chr1	22108963	22110199	RT4_K27ac_661		chr1	26438353	26438741	SW_K27ac_661		chr1	14463541	14464042	SC_K27ac_661		chr1	23514751	23516537	HT1376_K27ac_661		chr1	10437663	10438581	T1_H3K27ac_1_661		chr1	169452619	169457725	T3_H3K27ac_661		chr17	4045249	4048116	T4_H3K27ac_661		chr2	88353873	88355782	T5_H3K27ac_661
	chr1	22114177	22114624	RT4_K27ac_662		chr1	26453348	26453696	SW_K27ac_662		chr1	14464221	14464705	SC_K27ac_662		chr1	23523108	23524412	HT1376_K27ac_662		chr1	10438855	10439488	T1_H3K27ac_1_662		chr5	79702353	79704866	T3_H3K27ac_662		chr3	49057455	49060539	T4_H3K27ac_662		chr10	102756190	102760983	T5_H3K27ac_662
	chr1	22114785	22116028	RT4_K27ac_663		chr1	26496398	26497182	SW_K27ac_663		chr1	14464946	14465231	SC_K27ac_663		chr1	23543413	23544324	HT1376_K27ac_663		chr1	10440856	10441300	T1_H3K27ac_1_663		chr1	244611473	244615818	T3_H3K27ac_663		chr21	47743989	47745335	T4_H3K27ac_663		chr1	167903889	167907720	T5_H3K27ac_663
	chr1	22196297	22196838	RT4_K27ac_664		chr1	26504013	26504424	SW_K27ac_664		chr1	15058323	15058547	SC_K27ac_664		chr1	23566880	23567643	HT1376_K27ac_664		chr1	10447675	10448132	T1_H3K27ac_1_664		chr5	95295651	95300542	T3_H3K27ac_664		chr2	191513830	191517189	T4_H3K27ac_664		chr20	52824279	52825403	T5_H3K27ac_664
	chr1	22231219	22231462	RT4_K27ac_665		chr1	26560782	26561494	SW_K27ac_665		chr1	15058695	15060680	SC_K27ac_665		chr1	23625384	23625602	HT1376_K27ac_665		chr1	10448554	10448922	T1_H3K27ac_1_665		chr7	2593800	2595551	T3_H3K27ac_665		chr16	30885973	30888453	T4_H3K27ac_665		chr20	44599207	44601648	T5_H3K27ac_665
	chr1	22262537	22263622	RT4_K27ac_666		chr1	26605995	26606941	SW_K27ac_666		chr1	15069100	15069553	SC_K27ac_666		chr1	23669944	23671660	HT1376_K27ac_666		chr1	10458508	10459699	T1_H3K27ac_1_666		chrX	48896031	48901059	T3_H3K27ac_666		chr3	38205345	38207855	T4_H3K27ac_666		chr3	71628706	71634614	T5_H3K27ac_666
	chr1	22263964	22264379	RT4_K27ac_667		chr1	26624003	26624799	SW_K27ac_667		chr1	15202981	15203253	SC_K27ac_667		chr1	23693915	23694771	HT1376_K27ac_667		chr1	10460059	10460351	T1_H3K27ac_1_667		chr5	133859544	133864035	T3_H3K27ac_667		chr1	161170605	161173370	T4_H3K27ac_667		chr8	123792217	123795797	T5_H3K27ac_667
	chr1	22269476	22270011	RT4_K27ac_668		chr1	26624943	26625267	SW_K27ac_668		chr1	15236665	15238149	SC_K27ac_668		chr1	23694973	23696149	HT1376_K27ac_668		chr1	10460820	10460985	T1_H3K27ac_1_668		chr15	44954080	44957545	T3_H3K27ac_668		chr17	80254166	80258075	T4_H3K27ac_668		chr3	146258194	146263543	T5_H3K27ac_668
	chr1	22281949	22283491	RT4_K27ac_669		chr1	26629092	26629620	SW_K27ac_669		chr1	15240056	15240359	SC_K27ac_669		chr1	23703180	23704553	HT1376_K27ac_669		chr1	10466265	10466516	T1_H3K27ac_1_669		chr12	125398079	125406833	T3_H3K27ac_669		chr20	49546006	49548848	T4_H3K27ac_669		chr5	32172227	32175952	T5_H3K27ac_669
	chr1	22283662	22284588	RT4_K27ac_670		chr1	26632319	26633104	SW_K27ac_670		chr1	15251172	15251658	SC_K27ac_670		chr1	23729148	23729897	HT1376_K27ac_670		chr1	10468034	10468287	T1_H3K27ac_1_670		chr14	35869288	35876073	T3_H3K27ac_670		chr2	101922058	101925825	T4_H3K27ac_670		chr9	5626352	5630708	T5_H3K27ac_670
	chr1	22298377	22299261	RT4_K27ac_671		chr1	26676396	26676865	SW_K27ac_671		chr1	15271970	15272514	SC_K27ac_671		chr1	23730080	23731065	HT1376_K27ac_671		chr1	10474894	10475109	T1_H3K27ac_1_671		chr19	1267827	1272351	T3_H3K27ac_671		chr10	101380441	101382088	T4_H3K27ac_671		chr13	111363410	111367733	T5_H3K27ac_671
	chr1	22299683	22300674	RT4_K27ac_672		chr1	26677162	26680662	SW_K27ac_672		chr1	15273062	15273538	SC_K27ac_672		chr1	23776079	23776620	HT1376_K27ac_672		chr1	10475434	10475625	T1_H3K27ac_1_672		chr1	156081575	156087497	T3_H3K27ac_672		chr8	141519761	141523855	T4_H3K27ac_672		chr1	11795160	11798964	T5_H3K27ac_672
	chr1	22320592	22320946	RT4_K27ac_673		chr1	26680861	26682223	SW_K27ac_673		chr1	15273670	15274239	SC_K27ac_673		chr1	23778059	23779124	HT1376_K27ac_673		chr1	10489930	10490333	T1_H3K27ac_1_673		chr11	65478495	65480746	T3_H3K27ac_673		chr7	32535034	32536024	T4_H3K27ac_673		chr12	90100679	90104486	T5_H3K27ac_673
	chr1	22323632	22324213	RT4_K27ac_674		chr1	26682467	26683681	SW_K27ac_674		chr1	15297047	15297362	SC_K27ac_674		chr1	23803497	23803855	HT1376_K27ac_674		chr1	10517804	10518008	T1_H3K27ac_1_674		chr2	198317023	198319678	T3_H3K27ac_674		chr2	170440569	170441781	T4_H3K27ac_674		chr1	29507124	29509617	T5_H3K27ac_674
	chr1	22324564	22325395	RT4_K27ac_675		chr1	26683901	26685140	SW_K27ac_675		chr1	15303609	15303848	SC_K27ac_675		chr1	23804110	23805635	HT1376_K27ac_675		chr1	10532233	10532494	T1_H3K27ac_1_675		chr2	219430644	219436314	T3_H3K27ac_675		chr12	110886547	110888390	T4_H3K27ac_675		chr16	30581222	30583643	T5_H3K27ac_675
	chr1	22325979	22326520	RT4_K27ac_676		chr1	26685650	26686186	SW_K27ac_676		chr1	15322429	15323603	SC_K27ac_676		chr1	23809785	23810756	HT1376_K27ac_676		chr1	10534890	10535561	T1_H3K27ac_1_676		chr5	130969586	130972740	T3_H3K27ac_676		chr12	49657735	49662599	T4_H3K27ac_676		chr19	1652578	1653651	T5_H3K27ac_676
	chr1	22351907	22353027	RT4_K27ac_677		chr1	26731534	26731744	SW_K27ac_677		chr1	15323870	15324748	SC_K27ac_677		chr1	23823933	23824368	HT1376_K27ac_677		chr1	10555521	10556040	T1_H3K27ac_1_677		chr7	44923559	44926481	T3_H3K27ac_677		chr15	44828265	44830802	T4_H3K27ac_677		chr2	26100218	26102561	T5_H3K27ac_677
	chr1	22357818	22358685	RT4_K27ac_678		chr1	26758835	26759255	SW_K27ac_678		chr1	15325544	15325811	SC_K27ac_678		chr1	23854979	23855477	HT1376_K27ac_678		chr1	10556399	10556842	T1_H3K27ac_1_678		chr3	42844185	42846481	T3_H3K27ac_678		chr2	74404852	74406165	T4_H3K27ac_678		chr3	150124915	150129957	T5_H3K27ac_678
	chr1	22368651	22369728	RT4_K27ac_679		chr1	26798942	26799490	SW_K27ac_679		chr1	15329184	15329712	SC_K27ac_679		chr1	23856778	23857756	HT1376_K27ac_679		chr1	10562399	10562572	T1_H3K27ac_1_679		chr12	46382970	46384471	T3_H3K27ac_679		chr6	139094221	139095440	T4_H3K27ac_679		chr13	30422700	30424829	T5_H3K27ac_679
	chr1	22369929	22370999	RT4_K27ac_680		chr1	26826998	26827999	SW_K27ac_680		chr1	15346296	15346668	SC_K27ac_680		chr1	23880881	23881379	HT1376_K27ac_680		chr1	10570469	10571188	T1_H3K27ac_1_680		chr10	95190887	95202141	T3_H3K27ac_680		chr20	32399154	32400984	T4_H3K27ac_680		chr1	153934085	153937764	T5_H3K27ac_680
	chr1	22371245	22371704	RT4_K27ac_681		chr1	26857975	26858817	SW_K27ac_681		chr1	15346781	15347666	SC_K27ac_681		chr1	23881689	23882378	HT1376_K27ac_681		chr1	10571346	10572884	T1_H3K27ac_1_681		chr1	150120174	150128548	T3_H3K27ac_681		chr2	61696797	61699229	T4_H3K27ac_681		chr20	21283343	21284924	T5_H3K27ac_681
	chr1	22379164	22380392	RT4_K27ac_682		chr1	26946703	26947945	SW_K27ac_682		chr1	15417079	15417481	SC_K27ac_682		chr1	23882789	23883088	HT1376_K27ac_682		chr1	10574875	10575125	T1_H3K27ac_1_682		chr15	93442485	93455016	T3_H3K27ac_682		chr1	33115075	33118345	T4_H3K27ac_682		chr7	44669489	44681219	T5_H3K27ac_682
	chr1	22395745	22396692	RT4_K27ac_683		chr1	27018836	27019417	SW_K27ac_683		chr1	15479046	15481401	SC_K27ac_683		chr1	23883460	23884194	HT1376_K27ac_683		chr1	10645654	10645881	T1_H3K27ac_1_683		chr22	42015526	42018502	T3_H3K27ac_683		chr15	45878318	45880774	T4_H3K27ac_683		chr15	81291796	81295197	T5_H3K27ac_683
	chr1	22397006	22397391	RT4_K27ac_684		chr1	27019688	27020019	SW_K27ac_684		chr1	15484601	15485501	SC_K27ac_684		chr1	23884661	23885844	HT1376_K27ac_684		chr1	10646225	10646400	T1_H3K27ac_1_684		chr9	6006539	6009178	T3_H3K27ac_684		chr2	122287568	122289604	T4_H3K27ac_684		chr11	65546018	65549539	T5_H3K27ac_684
	chr1	22402217	22402459	RT4_K27ac_685		chr1	27022184	27022965	SW_K27ac_685		chr1	15497968	15500141	SC_K27ac_685		chr1	23886206	23886689	HT1376_K27ac_685		chr1	10650598	10651118	T1_H3K27ac_1_685		chr14	71786300	71789051	T3_H3K27ac_685		chr5	179245238	179249803	T4_H3K27ac_685		chr8	66752568	66755519	T5_H3K27ac_685
	chr1	22402620	22402881	RT4_K27ac_686		chr1	27023071	27024197	SW_K27ac_686		chr1	15500199	15501620	SC_K27ac_686		chr1	23888419	23888884	HT1376_K27ac_686		chr1	10659082	10659509	T1_H3K27ac_1_686		chr3	197517406	197519236	T3_H3K27ac_686		chr9	139685311	139687115	T4_H3K27ac_686		chr1	160230847	160233302	T5_H3K27ac_686
	chr1	22416295	22416719	RT4_K27ac_687		chr1	27024377	27024595	SW_K27ac_687		chr1	15502415	15502619	SC_K27ac_687		chr1	23891137	23891473	HT1376_K27ac_687		chr1	10660090	10660587	T1_H3K27ac_1_687		chr6	170101405	170103514	T3_H3K27ac_687		chrX	15692313	15695016	T4_H3K27ac_687		chr2	62422175	62425690	T5_H3K27ac_687
	chr1	22449004	22449907	RT4_K27ac_688		chr1	27059964	27060407	SW_K27ac_688		chr1	15503416	15504012	SC_K27ac_688		chr1	23902693	23904599	HT1376_K27ac_688		chr1	10692205	10692387	T1_H3K27ac_1_688		chr3	187454443	187465516	T3_H3K27ac_688		chr5	108744306	108747149	T4_H3K27ac_688		chr10	102129759	102135155	T5_H3K27ac_688
	chr1	22463522	22464258	RT4_K27ac_689		chr1	27097745	27098143	SW_K27ac_689		chr1	15504450	15506297	SC_K27ac_689		chr1	23911635	23912174	HT1376_K27ac_689		chr1	10692699	10693085	T1_H3K27ac_1_689		chr6	36560523	36565250	T3_H3K27ac_689		chr10	75172193	75174168	T4_H3K27ac_689		chr7	99613003	99614272	T5_H3K27ac_689
	chr1	22468619	22469412	RT4_K27ac_690		chr1	27114015	27115122	SW_K27ac_690		chr1	15527276	15527659	SC_K27ac_690		chr1	23912355	23913126	HT1376_K27ac_690		chr1	10694336	10694522	T1_H3K27ac_1_690		chr10	121409564	121419162	T3_H3K27ac_690		chr2	85764523	85767501	T4_H3K27ac_690		chr22	29168602	29169828	T5_H3K27ac_690
	chr1	22469771	22469991	RT4_K27ac_691		chr1	27126215	27126446	SW_K27ac_691		chr1	15528149	15528472	SC_K27ac_691		chr1	23918252	23920579	HT1376_K27ac_691		chr1	10694790	10696606	T1_H3K27ac_1_691		chr10	33243625	33249357	T3_H3K27ac_691		chr17	27275419	27279856	T4_H3K27ac_691		chr11	9480792	9484477	T5_H3K27ac_691
	chr1	22554863	22556798	RT4_K27ac_692		chr1	27152690	27152931	SW_K27ac_692		chr1	15545257	15545794	SC_K27ac_692		chr1	23943191	23945022	HT1376_K27ac_692		chr1	10697284	10697678	T1_H3K27ac_1_692		chr14	60557346	60560278	T3_H3K27ac_692		chr16	2562706	2567871	T4_H3K27ac_692		chr1	159890758	159896865	T5_H3K27ac_692
	chr1	22583598	22584363	RT4_K27ac_693		chr1	27174644	27175875	SW_K27ac_693		chr1	15573599	15574329	SC_K27ac_693		chr1	23945500	23946362	HT1376_K27ac_693		chr1	10735355	10735577	T1_H3K27ac_1_693		chr4	84375452	84378205	T3_H3K27ac_693		chr5	137672695	137675046	T4_H3K27ac_693		chr1	185282607	185288359	T5_H3K27ac_693
	chr1	22601222	22602496	RT4_K27ac_694		chr1	27179955	27181572	SW_K27ac_694		chr1	15587451	15588414	SC_K27ac_694		chr1	23953399	23955012	HT1376_K27ac_694		chr1	10740395	10740602	T1_H3K27ac_1_694		chr21	48054328	48056476	T3_H3K27ac_694		chr17	61817634	61820215	T4_H3K27ac_694		chr1	200637582	200640152	T5_H3K27ac_694
	chr1	22739502	22740118	RT4_K27ac_695		chr1	27181898	27182129	SW_K27ac_695		chr1	15609652	15610009	SC_K27ac_695		chr1	23961231	23962349	HT1376_K27ac_695		chr1	10747402	10747990	T1_H3K27ac_1_695		chr7	66145467	66149149	T3_H3K27ac_695		chr19	47103517	47106796	T4_H3K27ac_695		chr12	8849258	8851713	T5_H3K27ac_695
	chr1	22755331	22755840	RT4_K27ac_696		chr1	27182929	27183639	SW_K27ac_696		chr1	15648891	15649495	SC_K27ac_696		chr1	23977927	23978289	HT1376_K27ac_696		chr1	10752072	10752410	T1_H3K27ac_1_696		chr11	62646520	62651259	T3_H3K27ac_696		chr1	193026957	193029863	T4_H3K27ac_696		chr1	37934755	37947139	T5_H3K27ac_696
	chr1	22777808	22779133	RT4_K27ac_697		chr1	27183852	27184364	SW_K27ac_697		chr1	15649723	15650125	SC_K27ac_697		chr1	24017743	24019390	HT1376_K27ac_697		chr1	10752603	10752768	T1_H3K27ac_1_697		chr1	153699900	153702218	T3_H3K27ac_697		chr2	112812778	112814590	T4_H3K27ac_697		chr5	150457033	150467451	T5_H3K27ac_697
	chr1	23036997	23037214	RT4_K27ac_698		chr1	27185157	27185998	SW_K27ac_698		chr1	15650255	15650504	SC_K27ac_698		chr1	24069436	24070820	HT1376_K27ac_698		chr1	10753624	10754576	T1_H3K27ac_1_698		chr19	39880492	39883005	T3_H3K27ac_698		chr6	33167172	33169456	T4_H3K27ac_698		chr9	132797995	132807521	T5_H3K27ac_698
	chr1	23043762	23044119	RT4_K27ac_699		chr1	27187446	27187628	SW_K27ac_699		chr1	15654031	15654199	SC_K27ac_699		chr1	24103924	24105429	HT1376_K27ac_699		chr1	10755095	10755479	T1_H3K27ac_1_699		chr1	1509028	1511241	T3_H3K27ac_699		chr8	132915723	132917462	T4_H3K27ac_699		chr8	142136795	142138450	T5_H3K27ac_699
	chr1	23076447	23078027	RT4_K27ac_700		chr1	27187923	27189368	SW_K27ac_700		chr1	15663220	15665900	SC_K27ac_700		chr1	24117196	24119075	HT1376_K27ac_700		chr1	10755904	10756447	T1_H3K27ac_1_700		chr16	11346902	11351018	T3_H3K27ac_700		chr17	80185697	80190529	T4_H3K27ac_700		chr11	613770	617029	T5_H3K27ac_700
	chr1	23143780	23144480	RT4_K27ac_701		chr1	27189579	27191476	SW_K27ac_701		chr1	15667109	15667341	SC_K27ac_701		chr1	24119475	24120493	HT1376_K27ac_701		chr1	10756872	10757133	T1_H3K27ac_1_701		chr15	89179070	89184122	T3_H3K27ac_701		chr1	184722713	184725113	T4_H3K27ac_701		chr19	47775630	47777912	T5_H3K27ac_701
	chr1	23152977	23153998	RT4_K27ac_702		chr1	27191932	27192570	SW_K27ac_702		chr1	15667530	15669655	SC_K27ac_702		chr1	24126080	24127261	HT1376_K27ac_702		chr1	10759005	10760099	T1_H3K27ac_1_702		chr12	125049915	125052086	T3_H3K27ac_702		chr13	20435853	20439349	T4_H3K27ac_702		chr5	49961072	49964739	T5_H3K27ac_702
	chr1	23155760	23156832	RT4_K27ac_703		chr1	27203313	27203961	SW_K27ac_703		chr1	15671270	15673166	SC_K27ac_703		chr1	24127433	24127888	HT1376_K27ac_703		chr1	10782421	10782659	T1_H3K27ac_1_703		chr1	28995531	28996831	T3_H3K27ac_703		chr17	38294878	38297590	T4_H3K27ac_703		chr14	104094043	104096677	T5_H3K27ac_703
	chr1	23158040	23158656	RT4_K27ac_704		chr1	27204148	27204499	SW_K27ac_704		chr1	15674593	15675227	SC_K27ac_704		chr1	24151254	24151979	HT1376_K27ac_704		chr1	10819021	10819340	T1_H3K27ac_1_704		chr3	99978497	99980807	T3_H3K27ac_704		chr18	9913065	9915563	T4_H3K27ac_704		chr6	10407797	10421173	T5_H3K27ac_704
	chr1	23158854	23159158	RT4_K27ac_705		chr1	27216077	27216740	SW_K27ac_705		chr1	15675524	15680197	SC_K27ac_705		chr1	24160705	24161002	HT1376_K27ac_705		chr1	10819627	10819933	T1_H3K27ac_1_705		chr2	65355368	65358329	T3_H3K27ac_705		chr20	60961052	60962489	T4_H3K27ac_705		chr2	70350262	70353156	T5_H3K27ac_705
	chr1	23309874	23310745	RT4_K27ac_706		chr1	27226543	27226917	SW_K27ac_706		chr1	15680306	15685580	SC_K27ac_706		chr1	24191501	24192805	HT1376_K27ac_706		chr1	10820199	10820424	T1_H3K27ac_1_706		chr17	8063637	8068351	T3_H3K27ac_706		chr22	42014759	42018074	T4_H3K27ac_706		chr7	116502525	116504366	T5_H3K27ac_706
	chr1	23336510	23338165	RT4_K27ac_707		chr1	27247733	27247995	SW_K27ac_707		chr1	15694541	15694851	SC_K27ac_707		chr1	24194218	24194758	HT1376_K27ac_707		chr1	10820724	10822395	T1_H3K27ac_1_707		chr5	86706447	86709479	T3_H3K27ac_707		chr5	68389775	68390964	T4_H3K27ac_707		chr1	23668327	23672044	T5_H3K27ac_707
	chr1	23345412	23346914	RT4_K27ac_708		chr1	27248228	27248835	SW_K27ac_708		chr1	15726900	15727154	SC_K27ac_708		chr1	24261603	24262652	HT1376_K27ac_708		chr1	10822742	10823024	T1_H3K27ac_1_708		chr6	119667503	119672361	T3_H3K27ac_708		chr8	103816913	103823236	T4_H3K27ac_708		chr6	32156236	32161591	T5_H3K27ac_708
	chr1	23370982	23371150	RT4_K27ac_709		chr1	27286160	27286922	SW_K27ac_709		chr1	15735362	15740654	SC_K27ac_709		chr1	24285334	24287094	HT1376_K27ac_709		chr1	10823215	10823539	T1_H3K27ac_1_709		chr1	226888454	226892515	T3_H3K27ac_709		chr8	144678342	144679929	T4_H3K27ac_709		chr3	12704033	12706662	T5_H3K27ac_709
	chr1	23376813	23377029	RT4_K27ac_710		chr1	27335986	27336320	SW_K27ac_710		chr1	15742118	15742565	SC_K27ac_710		chr1	24299752	24300126	HT1376_K27ac_710		chr1	10825914	10826360	T1_H3K27ac_1_710		chr15	38543293	38548926	T3_H3K27ac_710		chr17	61849475	61852625	T4_H3K27ac_710		chr10	17268740	17274040	T5_H3K27ac_710
	chr1	23406695	23406959	RT4_K27ac_711		chr1	27337383	27337558	SW_K27ac_711		chr1	15742631	15744478	SC_K27ac_711		chr1	24306015	24307505	HT1376_K27ac_711		chr1	10834736	10834901	T1_H3K27ac_1_711		chr21	38638379	38641150	T3_H3K27ac_711		chr2	85131745	85135671	T4_H3K27ac_711		chr10	88280174	88282228	T5_H3K27ac_711
	chr1	23428521	23428913	RT4_K27ac_712		chr1	27468434	27469105	SW_K27ac_712		chr1	15745136	15746622	SC_K27ac_712		chr1	24344618	24346268	HT1376_K27ac_712		chr1	10836804	10837096	T1_H3K27ac_1_712		chr2	61762821	61766968	T3_H3K27ac_712		chr1	149898813	149900484	T4_H3K27ac_712		chr3	154040980	154042727	T5_H3K27ac_712
	chr1	23429132	23429867	RT4_K27ac_713		chr1	27469982	27470325	SW_K27ac_713		chr1	15747774	15748205	SC_K27ac_713		chr1	24358541	24359223	HT1376_K27ac_713		chr1	10838752	10839171	T1_H3K27ac_1_713		chr2	97532492	97537499	T3_H3K27ac_713		chr5	95294770	95298564	T4_H3K27ac_713		chr17	1618235	1619685	T5_H3K27ac_713
	chr1	23448824	23449862	RT4_K27ac_714		chr1	27481038	27481459	SW_K27ac_714		chr1	15749376	15749739	SC_K27ac_714		chr1	24397268	24397626	HT1376_K27ac_714		chr1	10839509	10839823	T1_H3K27ac_1_714		chr4	106392818	106395434	T3_H3K27ac_714		chr6	4021018	4022651	T4_H3K27ac_714		chr12	6713583	6716712	T5_H3K27ac_714
	chr1	23452323	23453438	RT4_K27ac_715		chr1	27648753	27649259	SW_K27ac_715		chr1	15749867	15750073	SC_K27ac_715		chr1	24444542	24444820	HT1376_K27ac_715		chr1	10839988	10840496	T1_H3K27ac_1_715		chr4	83810530	83813260	T3_H3K27ac_715		chr11	64006070	64009900	T4_H3K27ac_715		chr12	46762022	46768188	T5_H3K27ac_715
	chr1	23467090	23467440	RT4_K27ac_716		chr1	27667463	27668193	SW_K27ac_716		chr1	15750540	15751705	SC_K27ac_716		chr1	24446517	24447142	HT1376_K27ac_716		chr1	10853745	10854555	T1_H3K27ac_1_716		chr6	108878527	108889274	T3_H3K27ac_716		chr12	123942140	123945009	T4_H3K27ac_716		chr1	27815929	27817684	T5_H3K27ac_716
	chr1	23475406	23476004	RT4_K27ac_717		chr1	27668578	27669442	SW_K27ac_717		chr1	15752581	15753234	SC_K27ac_717		chr1	24476709	24476917	HT1376_K27ac_717		chr1	10855174	10855717	T1_H3K27ac_1_717		chr11	128384197	128394207	T3_H3K27ac_717		chr17	27618653	27622125	T4_H3K27ac_717		chr9	4983377	4986933	T5_H3K27ac_717
	chr1	23493852	23495315	RT4_K27ac_718		chr1	27669623	27670435	SW_K27ac_718		chr1	15755328	15755734	SC_K27ac_718		chr1	24501359	24502579	HT1376_K27ac_718		chr1	10856083	10856581	T1_H3K27ac_1_718		chr12	64844772	64847727	T3_H3K27ac_718		chr3	196228987	196231316	T4_H3K27ac_718		chr1	221915640	221917320	T5_H3K27ac_718
	chr1	23504002	23504585	RT4_K27ac_719		chr1	27719218	27719391	SW_K27ac_719		chr1	15755816	15757150	SC_K27ac_719		chr1	24510273	24511073	HT1376_K27ac_719		chr1	10863072	10863486	T1_H3K27ac_1_719		chr2	135674740	135677435	T3_H3K27ac_719		chr8	38853343	38855782	T4_H3K27ac_719		chr10	22628972	22630515	T5_H3K27ac_719
	chr1	23605093	23605517	RT4_K27ac_720		chr1	27762679	27762994	SW_K27ac_720		chr1	15757364	15757846	SC_K27ac_720		chr1	24513410	24514396	HT1376_K27ac_720		chr1	10864121	10865054	T1_H3K27ac_1_720		chr8	145515237	145517501	T3_H3K27ac_720		chr12	133404508	133406129	T4_H3K27ac_720		chr13	21634143	21636905	T5_H3K27ac_720
	chr1	23609231	23609624	RT4_K27ac_721		chr1	27815971	27817284	SW_K27ac_721		chr1	15757904	15759547	SC_K27ac_721		chr1	24592914	24593637	HT1376_K27ac_721		chr1	10891735	10891900	T1_H3K27ac_1_721		chr3	57676975	57679604	T3_H3K27ac_721		chr17	75135138	75139526	T4_H3K27ac_721		chr16	67969656	67971623	T5_H3K27ac_721
	chr1	23610291	23610650	RT4_K27ac_722		chr1	27830996	27831479	SW_K27ac_722		chr1	15759775	15760135	SC_K27ac_722		chr1	24620414	24621739	HT1376_K27ac_722		chr1	10960651	10961013	T1_H3K27ac_1_722		chr1	114470459	114475399	T3_H3K27ac_722		chr3	182510403	182513806	T4_H3K27ac_722		chr2	160470507	160474020	T5_H3K27ac_722
	chr1	23643589	23644024	RT4_K27ac_723		chr1	27852297	27852766	SW_K27ac_723		chr1	15789651	15789892	SC_K27ac_723		chr1	24645843	24646919	HT1376_K27ac_723		chr1	11024869	11025034	T1_H3K27ac_1_723		chr8	101731087	101735461	T3_H3K27ac_723		chr11	65263368	65269965	T4_H3K27ac_723		chr3	9931717	9933364	T5_H3K27ac_723
	chr1	23654796	23655623	RT4_K27ac_724		chr1	27865039	27865448	SW_K27ac_724		chr1	15850309	15850828	SC_K27ac_724		chr1	24691307	24692094	HT1376_K27ac_724		chr1	11072452	11073316	T1_H3K27ac_1_724		chr10	93168874	93170916	T3_H3K27ac_724		chr3	136469939	136473096	T4_H3K27ac_724		chr5	72111447	72113765	T5_H3K27ac_724
	chr1	23670000	23670833	RT4_K27ac_725		chr1	27865698	27866812	SW_K27ac_725		chr1	15851011	15851477	SC_K27ac_725		chr1	24718730	24719007	HT1376_K27ac_725		chr1	11074769	11074945	T1_H3K27ac_1_725		chr10	104153239	104157561	T3_H3K27ac_725		chr10	85898401	85900211	T4_H3K27ac_725		chr7	30322936	30326731	T5_H3K27ac_725
	chr1	23671027	23671699	RT4_K27ac_726		chr1	27867086	27868922	SW_K27ac_726		chr1	15851594	15853048	SC_K27ac_726		chr1	24739602	24740910	HT1376_K27ac_726		chr1	11120192	11120620	T1_H3K27ac_1_726		chr19	50879112	50880966	T3_H3K27ac_726		chr13	22177272	22179023	T4_H3K27ac_726		chr7	77042050	77047121	T5_H3K27ac_726
	chr1	23695063	23698049	RT4_K27ac_727		chr1	27869167	27871827	SW_K27ac_727		chr1	15853220	15854263	SC_K27ac_727		chr1	24769221	24769671	HT1376_K27ac_727		chr1	11121271	11121445	T1_H3K27ac_1_727		chr7	116502365	116504000	T3_H3K27ac_727		chr1	91486434	91488428	T4_H3K27ac_727		chr10	120838218	120841673	T5_H3K27ac_727
	chr1	23703352	23704034	RT4_K27ac_728		chr1	27928832	27929561	SW_K27ac_728		chr1	15884804	15885078	SC_K27ac_728		chr1	24789813	24791735	HT1376_K27ac_728		chr1	11159323	11160157	T1_H3K27ac_1_728		chr9	115094488	115095985	T3_H3K27ac_728		chr6	119669319	119672308	T4_H3K27ac_728		chr10	99185930	99188612	T5_H3K27ac_728
	chr1	23728539	23731184	RT4_K27ac_729		chr1	27929766	27930594	SW_K27ac_729		chr1	15885385	15885799	SC_K27ac_729		chr1	24828386	24830094	HT1376_K27ac_729		chr1	11206243	11206522	T1_H3K27ac_1_729		chr9	33813853	33819482	T3_H3K27ac_729		chr1	31191544	31192254	T4_H3K27ac_729		chr11	95521416	95525270	T5_H3K27ac_729
	chr1	23778054	23778689	RT4_K27ac_730		chr1	27985793	27986115	SW_K27ac_730		chr1	15885921	15886368	SC_K27ac_730		chr1	24841887	24843017	HT1376_K27ac_730		chr1	11207092	11207257	T1_H3K27ac_1_730		chr7	112088526	112094707	T3_H3K27ac_730		chr17	46907938	46909347	T4_H3K27ac_730		chr1	207493893	207496086	T5_H3K27ac_730
	chr1	23805470	23805859	RT4_K27ac_731		chr1	27986261	27986554	SW_K27ac_731		chr1	15886555	15886846	SC_K27ac_731		chr1	24848739	24848914	HT1376_K27ac_731		chr1	11306420	11306594	T1_H3K27ac_1_731		chr11	61729367	61741864	T3_H3K27ac_731		chr3	140660667	140662246	T4_H3K27ac_731		chr1	2486565	2489015	T5_H3K27ac_731
	chr1	23810257	23810754	RT4_K27ac_732		chr1	28051763	28052090	SW_K27ac_732		chr1	15910819	15911854	SC_K27ac_732		chr1	24932101	24932540	HT1376_K27ac_732		chr1	11306879	11307483	T1_H3K27ac_1_732		chr9	132219519	132224593	T3_H3K27ac_732		chr22	24235518	24238188	T4_H3K27ac_732		chr12	56550527	56554478	T5_H3K27ac_732
	chr1	23857111	23857742	RT4_K27ac_733		chr1	28052558	28053084	SW_K27ac_733		chr1	15928343	15928948	SC_K27ac_733		chr1	24936719	24937110	HT1376_K27ac_733		chr1	11321999	11322577	T1_H3K27ac_1_733		chr13	30421249	30424954	T3_H3K27ac_733		chr5	39073239	39075716	T4_H3K27ac_733		chr12	72055250	72059480	T5_H3K27ac_733
	chr1	23880751	23881398	RT4_K27ac_734		chr1	28099766	28100461	SW_K27ac_734		chr1	15929356	15930570	SC_K27ac_734		chr1	24968432	24969463	HT1376_K27ac_734		chr1	11322876	11323109	T1_H3K27ac_1_734		chr2	61403250	61406012	T3_H3K27ac_734		chr20	62204174	62206315	T4_H3K27ac_734		chr17	4846700	4854699	T5_H3K27ac_734
	chr1	23884610	23885864	RT4_K27ac_735		chr1	28157353	28157933	SW_K27ac_735		chr1	15943044	15943698	SC_K27ac_735		chr1	24969767	24970789	HT1376_K27ac_735		chr1	11328042	11328207	T1_H3K27ac_1_735		chr3	159479520	159487588	T3_H3K27ac_735		chr22	41486887	41489672	T4_H3K27ac_735		chr5	55287886	55291961	T5_H3K27ac_735
	chr1	23886189	23886643	RT4_K27ac_736		chr1	28190106	28190382	SW_K27ac_736		chr1	15944037	15944670	SC_K27ac_736		chr1	25009748	25010284	HT1376_K27ac_736		chr1	11333194	11334200	T1_H3K27ac_1_736		chr12	46764610	46767919	T3_H3K27ac_736		chr1	162530526	162532540	T4_H3K27ac_736		chr7	48123780	48130232	T5_H3K27ac_736
	chr1	23888126	23888859	RT4_K27ac_737		chr1	28201508	28201734	SW_K27ac_737		chr1	15944853	15945673	SC_K27ac_737		chr1	25010493	25011100	HT1376_K27ac_737		chr1	11563265	11563555	T1_H3K27ac_1_737		chr12	57021605	57024990	T3_H3K27ac_737		chr5	162929853	162934727	T4_H3K27ac_737		chr18	9612133	9616591	T5_H3K27ac_737
	chr1	23903410	23904398	RT4_K27ac_738		chr1	28286136	28286337	SW_K27ac_738		chr1	15946314	15946731	SC_K27ac_738		chr1	25019263	25019599	HT1376_K27ac_738		chr1	11714237	11714711	T1_H3K27ac_1_738		chr1	26945083	26948830	T3_H3K27ac_738		chr17	79268005	79269769	T4_H3K27ac_738		chr17	79476415	79484856	T5_H3K27ac_738
	chr1	23919397	23920451	RT4_K27ac_739		chr1	28414291	28415126	SW_K27ac_739		chr1	15981708	15981913	SC_K27ac_739		chr1	25028308	25029524	HT1376_K27ac_739		chr1	11724009	11725095	T1_H3K27ac_1_739		chr13	111363521	111367782	T3_H3K27ac_739		chr7	44083803	44086222	T4_H3K27ac_739		chr17	74485801	74491436	T5_H3K27ac_739
	chr1	23945655	23946563	RT4_K27ac_740		chr1	28517321	28517675	SW_K27ac_740		chr1	16006239	16009337	SC_K27ac_740		chr1	25029749	25030113	HT1376_K27ac_740		chr1	11740789	11741579	T1_H3K27ac_1_740		chr16	71517717	71519099	T3_H3K27ac_740		chr1	27018511	27025334	T4_H3K27ac_740		chr19	55851160	55852814	T5_H3K27ac_740
	chr1	23961530	23962180	RT4_K27ac_741		chr1	28558962	28559553	SW_K27ac_741		chr1	16009456	16010875	SC_K27ac_741		chr1	25039535	25040354	HT1376_K27ac_741		chr1	11742141	11742306	T1_H3K27ac_1_741		chr4	144434153	144436812	T3_H3K27ac_741		chr16	31190086	31192215	T4_H3K27ac_741		chr11	110166031	110170138	T5_H3K27ac_741
	chr1	24018124	24019174	RT4_K27ac_742		chr1	28562716	28563475	SW_K27ac_742		chr1	16011001	16011786	SC_K27ac_742		chr1	25045077	25046153	HT1376_K27ac_742		chr1	11779247	11779826	T1_H3K27ac_1_742		chr5	131628396	131632562	T3_H3K27ac_742		chr1	244996512	244999758	T4_H3K27ac_742		chr11	3859250	3863568	T5_H3K27ac_742
	chr1	24028291	24028564	RT4_K27ac_743		chr1	28576078	28576482	SW_K27ac_743		chr1	16012251	16012722	SC_K27ac_743		chr1	25048882	25049265	HT1376_K27ac_743		chr1	11789633	11790000	T1_H3K27ac_1_743		chr5	178052384	178054640	T3_H3K27ac_743		chr12	27090458	27092823	T4_H3K27ac_743		chr7	120590705	120591987	T5_H3K27ac_743
	chr1	24031214	24031816	RT4_K27ac_744		chr1	28585288	28585723	SW_K27ac_744		chr1	16062459	16062711	SC_K27ac_744		chr1	25054090	25054488	HT1376_K27ac_744		chr1	11790295	11790921	T1_H3K27ac_1_744		chr6	290654	294233	T3_H3K27ac_744		chr17	56083313	56085250	T4_H3K27ac_744		chr9	139376344	139377616	T5_H3K27ac_744
	chr1	24036432	24036789	RT4_K27ac_745		chr1	28585971	28586619	SW_K27ac_745		chr1	16068112	16068426	SC_K27ac_745		chr1	25071912	25073425	HT1376_K27ac_745		chr1	11791716	11791899	T1_H3K27ac_1_745		chr1	203763973	203766036	T3_H3K27ac_745		chr1	93426201	93428072	T4_H3K27ac_745		chr8	59570692	59573195	T5_H3K27ac_745
	chr1	24046756	24047265	RT4_K27ac_746		chr1	28586757	28587159	SW_K27ac_746		chr1	16082735	16083062	SC_K27ac_746		chr1	25088274	25089397	HT1376_K27ac_746		chr1	11792152	11793166	T1_H3K27ac_1_746		chr1	36395625	36397586	T3_H3K27ac_746		chr19	912317	914123	T4_H3K27ac_746		chr2	64976831	64979444	T5_H3K27ac_746
	chr1	24053320	24054249	RT4_K27ac_747		chr1	28655507	28656298	SW_K27ac_747		chr1	16083858	16084544	SC_K27ac_747		chr1	25103856	25104143	HT1376_K27ac_747		chr1	11796232	11796872	T1_H3K27ac_1_747		chr16	56964392	56969318	T3_H3K27ac_747		chr7	100032931	100034954	T4_H3K27ac_747		chr3	128368088	128370802	T5_H3K27ac_747
	chr1	24054489	24054772	RT4_K27ac_748		chr1	28677841	28678197	SW_K27ac_748		chr1	16084658	16087867	SC_K27ac_748		chr1	25113111	25113493	HT1376_K27ac_748		chr1	11797363	11797696	T1_H3K27ac_1_748		chr7	140623158	140625700	T3_H3K27ac_748		chr9	131418342	131420115	T4_H3K27ac_748		chr10	88470400	88472634	T5_H3K27ac_748
	chr1	24069494	24070805	RT4_K27ac_749		chr1	28680235	28680747	SW_K27ac_749		chr1	16090577	16093041	SC_K27ac_749		chr1	25132538	25132781	HT1376_K27ac_749		chr1	11846930	11847188	T1_H3K27ac_1_749		chr1	212458691	212461099	T3_H3K27ac_749		chr1	172501083	172503612	T4_H3K27ac_749		chr11	206280	209492	T5_H3K27ac_749
	chr1	24071067	24071564	RT4_K27ac_750		chr1	28681497	28681824	SW_K27ac_750		chr1	16093302	16094043	SC_K27ac_750		chr1	25155058	25155314	HT1376_K27ac_750		chr1	11847361	11847688	T1_H3K27ac_1_750		chr3	160281898	160284858	T3_H3K27ac_750		chr1	178995275	178996182	T4_H3K27ac_750		chr12	94070582	94072669	T5_H3K27ac_750
	chr1	24104301	24105541	RT4_K27ac_751		chr1	28744280	28744775	SW_K27ac_751		chr1	16106579	16108099	SC_K27ac_751		chr1	25173896	25174071	HT1376_K27ac_751		chr1	11847867	11848188	T1_H3K27ac_1_751		chr5	138088250	138091073	T3_H3K27ac_751		chr12	12509516	12511945	T4_H3K27ac_751		chr1	6844017	6845120	T5_H3K27ac_751
	chr1	24116106	24118435	RT4_K27ac_752		chr1	28832021	28832281	SW_K27ac_752		chr1	16108852	16109436	SC_K27ac_752		chr1	25348957	25349457	HT1376_K27ac_752		chr1	11848466	11848746	T1_H3K27ac_1_752		chr7	152159889	152162255	T3_H3K27ac_752		chr13	99852194	99854242	T4_H3K27ac_752		chr19	2059085	2062664	T5_H3K27ac_752
	chr1	24125784	24127263	RT4_K27ac_753		chr1	28832605	28835302	SW_K27ac_753		chr1	16109507	16110125	SC_K27ac_753		chr1	25558469	25560150	HT1376_K27ac_753		chr1	11849624	11850970	T1_H3K27ac_1_753		chr7	35839486	35842569	T3_H3K27ac_753		chr19	42720657	42722641	T4_H3K27ac_753		chr20	5625318	5630981	T5_H3K27ac_753
	chr1	24127487	24127725	RT4_K27ac_754		chr1	28835763	28836016	SW_K27ac_754		chr1	16110185	16111729	SC_K27ac_754		chr1	25565768	25567273	HT1376_K27ac_754		chr1	11851189	11851890	T1_H3K27ac_1_754		chr11	125461020	125462505	T3_H3K27ac_754		chr3	113463704	113467377	T4_H3K27ac_754		chr5	77070585	77072239	T5_H3K27ac_754
	chr1	24151319	24151997	RT4_K27ac_755		chr1	28844737	28845040	SW_K27ac_755		chr1	16111927	16114692	SC_K27ac_755		chr1	25572898	25574496	HT1376_K27ac_755		chr1	11852784	11853045	T1_H3K27ac_1_755		chr10	102790576	102793211	T3_H3K27ac_755		chr6	139454656	139458544	T4_H3K27ac_755		chr2	48539631	48543441	T5_H3K27ac_755
	chr1	24156896	24157629	RT4_K27ac_756		chr1	28845173	28846078	SW_K27ac_756		chr1	16114848	16116090	SC_K27ac_756		chr1	25579922	25581400	HT1376_K27ac_756		chr1	11857828	11858030	T1_H3K27ac_1_756		chr1	156735880	156738448	T3_H3K27ac_756		chr13	50570368	50571778	T4_H3K27ac_756		chr19	44177686	44180263	T5_H3K27ac_756
	chr1	24180944	24181304	RT4_K27ac_757		chr1	28852363	28853372	SW_K27ac_757		chr1	16116149	16117022	SC_K27ac_757		chr1	25593860	25594539	HT1376_K27ac_757		chr1	11863086	11863553	T1_H3K27ac_1_757		chr12	67661431	67665351	T3_H3K27ac_757		chr2	88354213	88356127	T4_H3K27ac_757		chr1	223899506	223906568	T5_H3K27ac_757
	chr1	24191597	24192817	RT4_K27ac_758		chr1	28853701	28854434	SW_K27ac_758		chr1	16117617	16117896	SC_K27ac_758		chr1	25656240	25656692	HT1376_K27ac_758		chr1	11863818	11864460	T1_H3K27ac_1_758		chr13	31039530	31040212	T3_H3K27ac_758		chr3	28389139	28391254	T4_H3K27ac_758		chr1	65530920	65535281	T5_H3K27ac_758
	chr1	24194124	24194771	RT4_K27ac_759		chr1	28879017	28879256	SW_K27ac_759		chr1	16118743	16119076	SC_K27ac_759		chr1	25664241	25665442	HT1376_K27ac_759		chr1	11864802	11866062	T1_H3K27ac_1_759		chr1	67394943	67397690	T3_H3K27ac_759		chr6	26521287	26523232	T4_H3K27ac_759		chr10	74033684	74037725	T5_H3K27ac_759
	chr1	24234482	24234846	RT4_K27ac_760		chr1	28879765	28880214	SW_K27ac_760		chr1	16119232	16120030	SC_K27ac_760		chr1	25678558	25678978	HT1376_K27ac_760		chr1	11866248	11867319	T1_H3K27ac_1_760		chr18	54304787	54306815	T3_H3K27ac_760		chr7	100463222	100466723	T4_H3K27ac_760		chr1	244996539	245000231	T5_H3K27ac_760
	chr1	24242946	24243326	RT4_K27ac_761		chr1	28907868	28908335	SW_K27ac_761		chr1	16120160	16128425	SC_K27ac_761		chr1	25756391	25757153	HT1376_K27ac_761		chr1	11881246	11881494	T1_H3K27ac_1_761		chr2	70140152	70146220	T3_H3K27ac_761		chr7	72970138	72972487	T4_H3K27ac_761		chr17	48796171	48798031	T5_H3K27ac_761
	chr1	24246203	24247958	RT4_K27ac_762		chr1	28908518	28908835	SW_K27ac_762		chr1	16155875	16157702	SC_K27ac_762		chr1	25757410	25758292	HT1376_K27ac_762		chr1	11967946	11969809	T1_H3K27ac_1_762		chr3	69060068	69063924	T3_H3K27ac_762		chr1	153507364	153509376	T4_H3K27ac_762		chr17	6914941	6920276	T5_H3K27ac_762
	chr1	24277969	24278881	RT4_K27ac_763		chr1	28968917	28969517	SW_K27ac_763		chr1	16158077	16161435	SC_K27ac_763		chr1	25869885	25871241	HT1376_K27ac_763		chr1	11985597	11986276	T1_H3K27ac_1_763		chr1	149856160	149860980	T3_H3K27ac_763		chr20	48531170	48534024	T4_H3K27ac_763		chr18	9135541	9140680	T5_H3K27ac_763
	chr1	24285347	24286996	RT4_K27ac_764		chr1	28969746	28970385	SW_K27ac_764		chr1	16161496	16163306	SC_K27ac_764		chr1	25893874	25895819	HT1376_K27ac_764		chr1	11986657	11986978	T1_H3K27ac_1_764		chr7	4722119	4724754	T3_H3K27ac_764		chr22	50627387	50632095	T4_H3K27ac_764		chr4	24584729	24586938	T5_H3K27ac_764
	chr1	24306107	24308159	RT4_K27ac_765		chr1	28974796	28975190	SW_K27ac_765		chr1	16172725	16172926	SC_K27ac_765		chr1	26033975	26035531	HT1376_K27ac_765		chr1	11994112	11995190	T1_H3K27ac_1_765		chr13	20531461	20534419	T3_H3K27ac_765		chr2	160567926	160570474	T4_H3K27ac_765		chr6	2987562	2992035	T5_H3K27ac_765
	chr1	24329946	24330146	RT4_K27ac_766		chr1	28994804	28995195	SW_K27ac_766		chr1	16173022	16174069	SC_K27ac_766		chr1	26126165	26126579	HT1376_K27ac_766		chr1	12020684	12021439	T1_H3K27ac_1_766		chr1	89456802	89460083	T3_H3K27ac_766		chr3	113414581	113416920	T4_H3K27ac_766		chr6	30293501	30295764	T5_H3K27ac_766
	chr1	24344876	24345376	RT4_K27ac_767		chr1	28995594	28996144	SW_K27ac_767		chr1	16174181	16176842	SC_K27ac_767		chr1	26127066	26127282	HT1376_K27ac_767		chr1	12039594	12039821	T1_H3K27ac_1_767		chr6	122791708	122793565	T3_H3K27ac_767		chr12	66562498	66564422	T4_H3K27ac_767		chr6	74228494	74234270	T5_H3K27ac_767
	chr1	24345535	24346366	RT4_K27ac_768		chr1	29063455	29064277	SW_K27ac_768		chr1	16178210	16178436	SC_K27ac_768		chr1	26146016	26147316	HT1376_K27ac_768		chr1	12040031	12041490	T1_H3K27ac_1_768		chr6	4017459	4019821	T3_H3K27ac_768		chr17	74261501	74265610	T4_H3K27ac_768		chr15	85290486	85293011	T5_H3K27ac_768
	chr1	24374809	24375536	RT4_K27ac_769		chr1	29213387	29214027	SW_K27ac_769		chr1	16183515	16183720	SC_K27ac_769		chr1	26158623	26160012	HT1376_K27ac_769		chr1	12041688	12042239	T1_H3K27ac_1_769		chr3	184049826	184057120	T3_H3K27ac_769		chr5	138088238	138090293	T4_H3K27ac_769		chr19	17621288	17623584	T5_H3K27ac_769
	chr1	24444486	24445163	RT4_K27ac_770		chr1	29507246	29508373	SW_K27ac_770		chr1	16212153	16212938	SC_K27ac_770		chr1	26185184	26186650	HT1376_K27ac_770		chr1	12075264	12075801	T1_H3K27ac_1_770		chr11	6631915	6635366	T3_H3K27ac_770		chr14	104094446	104096521	T4_H3K27ac_770		chr14	23790612	23792007	T5_H3K27ac_770
	chr1	24446400	24447145	RT4_K27ac_771		chr1	29553403	29553936	SW_K27ac_771		chr1	16213098	16213421	SC_K27ac_771		chr1	26198210	26198821	HT1376_K27ac_771		chr1	12079149	12079342	T1_H3K27ac_1_771		chr13	20436298	20439493	T3_H3K27ac_771		chr3	193546507	193549984	T4_H3K27ac_771		chr11	10878156	10881318	T5_H3K27ac_771
	chr1	24469227	24469512	RT4_K27ac_772		chr1	29554407	29554670	SW_K27ac_772		chr1	16219768	16220311	SC_K27ac_772		chr1	26201020	26202971	HT1376_K27ac_772		chr1	12079551	12080190	T1_H3K27ac_1_772		chr19	29702860	29704610	T3_H3K27ac_772		chr2	219260300	219266244	T4_H3K27ac_772		chr17	73774223	73776329	T5_H3K27ac_772
	chr1	24470554	24471087	RT4_K27ac_773		chr1	29556995	29557475	SW_K27ac_773		chr1	16224656	16224893	SC_K27ac_773		chr1	26216250	26217108	HT1376_K27ac_773		chr1	12107802	12107967	T1_H3K27ac_1_773		chr18	2654479	2659713	T3_H3K27ac_773		chr12	123458837	123460597	T4_H3K27ac_773		chr11	94882096	94884746	T5_H3K27ac_773
	chr1	24513445	24514554	RT4_K27ac_774		chr1	29563239	29564277	SW_K27ac_774		chr1	16226489	16226738	SC_K27ac_774		chr1	26217314	26218798	HT1376_K27ac_774		chr1	12112356	12112698	T1_H3K27ac_1_774		chr1	153605833	153608506	T3_H3K27ac_774		chr10	1101274	1103759	T4_H3K27ac_774		chr18	32923214	32924939	T5_H3K27ac_774
	chr1	24522196	24522971	RT4_K27ac_775		chr1	29564433	29565764	SW_K27ac_775		chr1	16228493	16228760	SC_K27ac_775		chr1	26219178	26219444	HT1376_K27ac_775		chr1	12128135	12128889	T1_H3K27ac_1_775		chr19	50143642	50146564	T3_H3K27ac_775		chr17	66507274	66509963	T4_H3K27ac_775		chr2	61762227	61766844	T5_H3K27ac_775
	chr1	24528611	24529551	RT4_K27ac_776		chr1	29566176	29567287	SW_K27ac_776		chr1	16228936	16229157	SC_K27ac_776		chr1	26231587	26232884	HT1376_K27ac_776		chr1	12138752	12139019	T1_H3K27ac_1_776		chr2	230784413	230788281	T3_H3K27ac_776		chr3	9437411	9440706	T4_H3K27ac_776		chr12	1701407	1705526	T5_H3K27ac_776
	chr1	24529706	24530040	RT4_K27ac_777		chr1	29646826	29647206	SW_K27ac_777		chr1	16231487	16231682	SC_K27ac_777		chr1	26238549	26239034	HT1376_K27ac_777		chr1	12141707	12142094	T1_H3K27ac_1_777		chr12	70636149	70638757	T3_H3K27ac_777		chr8	110551989	110553339	T4_H3K27ac_777		chr1	181055753	181060479	T5_H3K27ac_777
	chr1	24532544	24533409	RT4_K27ac_778		chr1	29876314	29876700	SW_K27ac_778		chr1	16243146	16243509	SC_K27ac_778		chr1	26323535	26324665	HT1376_K27ac_778		chr1	12148288	12148651	T1_H3K27ac_1_778		chr19	52772765	52774387	T3_H3K27ac_778		chr1	41157020	41159130	T4_H3K27ac_778		chr10	180311	182754	T5_H3K27ac_778
	chr1	24548972	24549390	RT4_K27ac_779		chr1	29876939	29877633	SW_K27ac_779		chr1	16250420	16250826	SC_K27ac_779		chr1	26361971	26362872	HT1376_K27ac_779		chr1	12149069	12149380	T1_H3K27ac_1_779		chr19	59064854	59071723	T3_H3K27ac_779		chr2	70140729	70141897	T4_H3K27ac_779		chr5	140996138	140998677	T5_H3K27ac_779
	chr1	24549565	24549959	RT4_K27ac_780		chr1	30043199	30043498	SW_K27ac_780		chr1	16274282	16277798	SC_K27ac_780		chr1	26405258	26406160	HT1376_K27ac_780		chr1	12157409	12157576	T1_H3K27ac_1_780		chr2	88353419	88355999	T3_H3K27ac_780		chr12	109914308	109915844	T4_H3K27ac_780		chr14	73603014	73604678	T5_H3K27ac_780
	chr1	24562597	24564025	RT4_K27ac_781		chr1	30112560	30112871	SW_K27ac_781		chr1	16277855	16279447	SC_K27ac_781		chr1	26410659	26411068	HT1376_K27ac_781		chr1	12162643	12162959	T1_H3K27ac_1_781		chr8	66751903	66755493	T3_H3K27ac_781		chr12	53613179	53616948	T4_H3K27ac_781		chr6	74159074	74162828	T5_H3K27ac_781
	chr1	24578496	24579508	RT4_K27ac_782		chr1	30113231	30113515	SW_K27ac_782		chr1	16279630	16281163	SC_K27ac_782		chr1	26437399	26438161	HT1376_K27ac_782		chr1	12179116	12179281	T1_H3K27ac_1_782		chr17	17738521	17746702	T3_H3K27ac_782		chr13	31036434	31039357	T4_H3K27ac_782		chr12	2112603	2114157	T5_H3K27ac_782
	chr1	24592683	24594044	RT4_K27ac_783		chr1	30182273	30182498	SW_K27ac_783		chr1	16285605	16285778	SC_K27ac_783		chr1	26438324	26439198	HT1376_K27ac_783		chr1	12181557	12181722	T1_H3K27ac_1_783		chr6	32819366	32823099	T3_H3K27ac_783		chr7	66460031	66460665	T4_H3K27ac_783		chr12	96791695	96795812	T5_H3K27ac_783
	chr1	24610637	24612581	RT4_K27ac_784		chr1	30457407	30457935	SW_K27ac_784		chr1	16301952	16302918	SC_K27ac_784		chr1	26448402	26449065	HT1376_K27ac_784		chr1	12186001	12186215	T1_H3K27ac_1_784		chr2	152144806	152147435	T3_H3K27ac_784		chr3	185303269	185304914	T4_H3K27ac_784		chr14	35098454	35100265	T5_H3K27ac_784
	chr1	24612896	24613668	RT4_K27ac_785		chr1	30478616	30479137	SW_K27ac_785		chr1	16339049	16340280	SC_K27ac_785		chr1	26449757	26450144	HT1376_K27ac_785		chr1	12186443	12186674	T1_H3K27ac_1_785		chr17	66507191	66510443	T3_H3K27ac_785		chr1	235666020	235669013	T4_H3K27ac_785		chr4	15002388	15007766	T5_H3K27ac_785
	chr1	24620519	24621721	RT4_K27ac_786		chr1	30663707	30663982	SW_K27ac_786		chr1	16375062	16375939	SC_K27ac_786		chr1	26452883	26453510	HT1376_K27ac_786		chr1	12192342	12192557	T1_H3K27ac_1_786		chr19	42579079	42581678	T3_H3K27ac_786		chr2	20410900	20425996	T4_H3K27ac_786		chr9	98636835	98639519	T5_H3K27ac_786
	chr1	24645921	24647093	RT4_K27ac_787		chr1	31091577	31092150	SW_K27ac_787		chr1	16393265	16393678	SC_K27ac_787		chr1	26488136	26488630	HT1376_K27ac_787		chr1	12193413	12193695	T1_H3K27ac_1_787		chr19	8577829	8579707	T3_H3K27ac_787		chr8	48647412	48651768	T4_H3K27ac_787		chr19	50353369	50355297	T5_H3K27ac_787
	chr1	24647781	24649195	RT4_K27ac_788		chr1	31123342	31123660	SW_K27ac_788		chr1	16399548	16400024	SC_K27ac_788		chr1	26496324	26497066	HT1376_K27ac_788		chr1	12203168	12203395	T1_H3K27ac_1_788		chr2	28110884	28117192	T3_H3K27ac_788		chr8	104426463	104427615	T4_H3K27ac_788		chr12	31358762	31360916	T5_H3K27ac_788
	chr1	24683724	24684165	RT4_K27ac_789		chr1	31126735	31126954	SW_K27ac_789		chr1	16402725	16403492	SC_K27ac_789		chr1	26503531	26505119	HT1376_K27ac_789		chr1	12203944	12204328	T1_H3K27ac_1_789		chr1	36613368	36619321	T3_H3K27ac_789		chr14	65381090	65381857	T4_H3K27ac_789		chr14	35590110	35592569	T5_H3K27ac_789
	chr1	24691075	24692784	RT4_K27ac_790		chr1	31130145	31130422	SW_K27ac_790		chr1	16408235	16408737	SC_K27ac_790		chr1	26560667	26561543	HT1376_K27ac_790		chr1	12206829	12207275	T1_H3K27ac_1_790		chr12	123942181	123944934	T3_H3K27ac_790		chr14	20928712	20929712	T4_H3K27ac_790		chr7	2594438	2595735	T5_H3K27ac_790
	chr1	24700875	24701526	RT4_K27ac_791		chr1	31191579	31192204	SW_K27ac_791		chr1	16409886	16410418	SC_K27ac_791		chr1	26606018	26606971	HT1376_K27ac_791		chr1	12207448	12208548	T1_H3K27ac_1_791		chr1	42921072	42923365	T3_H3K27ac_791		chr12	62860058	62861364	T4_H3K27ac_791		chr17	80172695	80176179	T5_H3K27ac_791
	chr1	24701851	24702836	RT4_K27ac_792		chr1	31221226	31221941	SW_K27ac_792		chr1	16415012	16415578	SC_K27ac_792		chr1	26624380	26625173	HT1376_K27ac_792		chr1	12208849	12209425	T1_H3K27ac_1_792		chr15	57997806	58000741	T3_H3K27ac_792		chr10	76969436	76971806	T4_H3K27ac_792		chr3	141203980	141207712	T5_H3K27ac_792
	chr1	24707066	24709230	RT4_K27ac_793		chr1	31223512	31224241	SW_K27ac_793		chr1	16415698	16416007	SC_K27ac_793		chr1	26632202	26633202	HT1376_K27ac_793		chr1	12209722	12211569	T1_H3K27ac_1_793		chr18	9135216	9141925	T3_H3K27ac_793		chr15	63792273	63798388	T4_H3K27ac_793		chr12	62652805	62655977	T5_H3K27ac_793
	chr1	24710565	24710831	RT4_K27ac_794		chr1	31229807	31230840	SW_K27ac_794		chr1	16439496	16440411	SC_K27ac_794		chr1	26633396	26633767	HT1376_K27ac_794		chr1	12212496	12213334	T1_H3K27ac_1_794		chr7	106809332	106811365	T3_H3K27ac_794		chr18	3446325	3454238	T4_H3K27ac_794		chr18	33708427	33710573	T5_H3K27ac_794
	chr1	24718255	24718957	RT4_K27ac_795		chr1	31537732	31538550	SW_K27ac_795		chr1	16448116	16448511	SC_K27ac_795		chr1	26677346	26678056	HT1376_K27ac_795		chr1	12213589	12213880	T1_H3K27ac_1_795		chr11	67118509	67125112	T3_H3K27ac_795		chr7	139043242	139045971	T4_H3K27ac_795		chr13	103247895	103250438	T5_H3K27ac_795
	chr1	24739853	24740213	RT4_K27ac_796		chr1	31627435	31627791	SW_K27ac_796		chr1	16448695	16449447	SC_K27ac_796		chr1	26678237	26679151	HT1376_K27ac_796		chr1	12217706	12218403	T1_H3K27ac_1_796		chr19	8453864	8458106	T3_H3K27ac_796		chr2	9694822	9697068	T4_H3K27ac_796		chr2	150443259	150444675	T5_H3K27ac_796
	chr1	24742471	24742973	RT4_K27ac_797		chr1	31627963	31628346	SW_K27ac_797		chr1	16459919	16460586	SC_K27ac_797		chr1	26683140	26683588	HT1376_K27ac_797		chr1	12220979	12221978	T1_H3K27ac_1_797		chr20	32399087	32401411	T3_H3K27ac_797		chr10	28820927	28823804	T4_H3K27ac_797		chr5	141227805	141230957	T5_H3K27ac_797
	chr1	24743240	24743693	RT4_K27ac_798		chr1	31769029	31769558	SW_K27ac_798		chr1	16464234	16464661	SC_K27ac_798		chr1	26683848	26684572	HT1376_K27ac_798		chr1	12222144	12222801	T1_H3K27ac_1_798		chr6	36408119	36413555	T3_H3K27ac_798		chr1	32859019	32861051	T4_H3K27ac_798		chr7	35839527	35842474	T5_H3K27ac_798
	chr1	24744846	24746431	RT4_K27ac_799		chr1	31769892	31770405	SW_K27ac_799		chr1	16464903	16466963	SC_K27ac_799		chr1	26723032	26723238	HT1376_K27ac_799		chr1	12223738	12224113	T1_H3K27ac_1_799		chr6	29690529	29692517	T3_H3K27ac_799		chr5	10352745	10355227	T4_H3K27ac_799		chr11	18414782	18418312	T5_H3K27ac_799
	chr1	24814255	24814602	RT4_K27ac_800		chr1	31853975	31854387	SW_K27ac_800		chr1	16467229	16469055	SC_K27ac_800		chr1	26757970	26759419	HT1376_K27ac_800		chr1	12226680	12229147	T1_H3K27ac_1_800		chr11	9480553	9484336	T3_H3K27ac_800		chr3	13049607	13060606	T4_H3K27ac_800		chr3	47821456	47824682	T5_H3K27ac_800
	chr1	24828426	24829656	RT4_K27ac_801		chr1	31854789	31855096	SW_K27ac_801		chr1	16469802	16473994	SC_K27ac_801		chr1	26798469	26798721	HT1376_K27ac_801		chr1	12230344	12231097	T1_H3K27ac_1_801		chr16	31469107	31472331	T3_H3K27ac_801		chr16	30669643	30671883	T4_H3K27ac_801		chr11	18547414	18549603	T5_H3K27ac_801
	chr1	24867637	24868770	RT4_K27ac_802		chr1	31855215	31855430	SW_K27ac_802		chr1	16477051	16483100	SC_K27ac_802		chr1	26798892	26800161	HT1376_K27ac_802		chr1	12231406	12231602	T1_H3K27ac_1_802		chr6	31587061	31590131	T3_H3K27ac_802		chr19	44257197	44260627	T4_H3K27ac_802		chr12	122905676	122908420	T5_H3K27ac_802
	chr1	24893412	24893630	RT4_K27ac_803		chr1	31862394	31862804	SW_K27ac_803		chr1	16485809	16486305	SC_K27ac_803		chr1	26809043	26809661	HT1376_K27ac_803		chr1	12231794	12235325	T1_H3K27ac_1_803		chr9	131935687	131939731	T3_H3K27ac_803		chr1	29062774	29064987	T4_H3K27ac_803		chr14	24710542	24713939	T5_H3K27ac_803
	chr1	24893966	24895008	RT4_K27ac_804		chr1	31870096	31870821	SW_K27ac_804		chr1	16490637	16491068	SC_K27ac_804		chr1	26813483	26813996	HT1376_K27ac_804		chr1	12235527	12236089	T1_H3K27ac_1_804		chr17	36980356	36982625	T3_H3K27ac_804		chr14	35514642	35516674	T4_H3K27ac_804		chr17	53497570	53499862	T5_H3K27ac_804
	chr1	24917826	24918624	RT4_K27ac_805		chr1	31886093	31887899	SW_K27ac_805		chr1	16491133	16492063	SC_K27ac_805		chr1	26826857	26828161	HT1376_K27ac_805		chr1	12236996	12239033	T1_H3K27ac_1_805		chr17	49196511	49200691	T3_H3K27ac_805		chr6	109701918	109705602	T4_H3K27ac_805		chr18	56337515	56339744	T5_H3K27ac_805
	chr1	24920541	24921319	RT4_K27ac_806		chr1	31888919	31889289	SW_K27ac_806		chr1	16493663	16494862	SC_K27ac_806		chr1	26834963	26835221	HT1376_K27ac_806		chr1	12239403	12241457	T1_H3K27ac_1_806		chr8	102215206	102219385	T3_H3K27ac_806		chr1	44411528	44413570	T4_H3K27ac_806		chr19	10763230	10767457	T5_H3K27ac_806
	chr1	24924388	24924823	RT4_K27ac_807		chr1	31894518	31895623	SW_K27ac_807		chr1	16498157	16503860	SC_K27ac_807		chr1	26855831	26856946	HT1376_K27ac_807		chr1	12241767	12242033	T1_H3K27ac_1_807		chr11	65377951	65382802	T3_H3K27ac_807		chr5	179125877	179127213	T4_H3K27ac_807		chr2	135676311	135677909	T5_H3K27ac_807
	chr1	24968450	24969444	RT4_K27ac_808		chr1	31896269	31896785	SW_K27ac_808		chr1	16504882	16506070	SC_K27ac_808		chr1	26857181	26857628	HT1376_K27ac_808		chr1	12242651	12242940	T1_H3K27ac_1_808		chr10	60025479	60030461	T3_H3K27ac_808		chr14	24710687	24713471	T4_H3K27ac_808		chr2	145269886	145278458	T5_H3K27ac_808
	chr1	24969775	24970693	RT4_K27ac_809		chr1	31897584	31898544	SW_K27ac_809		chr1	16506911	16507087	SC_K27ac_809		chr1	26864900	26865107	HT1376_K27ac_809		chr1	12244013	12244367	T1_H3K27ac_1_809		chr16	58661714	58664816	T3_H3K27ac_809		chr7	44529667	44530872	T4_H3K27ac_809		chr22	38574795	38578658	T5_H3K27ac_809
	chr1	24983564	24983831	RT4_K27ac_810		chr1	31917993	31918435	SW_K27ac_810		chr1	16507288	16509712	SC_K27ac_810		chr1	26925379	26925825	HT1376_K27ac_810		chr1	12244533	12246711	T1_H3K27ac_1_810		chr6	29892811	29895515	T3_H3K27ac_810		chr14	50327831	50330910	T4_H3K27ac_810		chr6	144536245	144538284	T5_H3K27ac_810
	chr1	25001295	25001826	RT4_K27ac_811		chr1	31943788	31944200	SW_K27ac_811		chr1	16509880	16511734	SC_K27ac_811		chr1	26946492	26948454	HT1376_K27ac_811		chr1	12246956	12247132	T1_H3K27ac_1_811		chr6	36643629	36651966	T3_H3K27ac_811		chr17	2294837	2297775	T4_H3K27ac_811		chr6	26439464	26441615	T5_H3K27ac_811
	chr1	25031523	25032880	RT4_K27ac_812		chr1	31945159	31945544	SW_K27ac_812		chr1	16513046	16513214	SC_K27ac_812		chr1	26953533	26953804	HT1376_K27ac_812		chr1	12259258	12259423	T1_H3K27ac_1_812		chr1	112161821	112166624	T3_H3K27ac_812		chr19	55987071	55989166	T4_H3K27ac_812		chr7	155436215	155438210	T5_H3K27ac_812
	chr1	25048856	25049273	RT4_K27ac_813		chr1	31949964	31950970	SW_K27ac_813		chr1	16514093	16516272	SC_K27ac_813		chr1	26963042	26963843	HT1376_K27ac_813		chr1	12269301	12269635	T1_H3K27ac_1_813		chr12	57478839	57485689	T3_H3K27ac_813		chr19	50142848	50146188	T4_H3K27ac_813		chr9	19125312	19130248	T5_H3K27ac_813
	chr1	25050540	25052536	RT4_K27ac_814		chr1	31977916	31978162	SW_K27ac_814		chr1	16518438	16518876	SC_K27ac_814		chr1	27018805	27019497	HT1376_K27ac_814		chr1	12269871	12270036	T1_H3K27ac_1_814		chr1	28098266	28101402	T3_H3K27ac_814		chr1	181057281	181060030	T4_H3K27ac_814		chr1	24305564	24308418	T5_H3K27ac_814
	chr1	25069044	25069708	RT4_K27ac_815		chr1	31986691	31987043	SW_K27ac_815		chr1	16532191	16532520	SC_K27ac_815		chr1	27019673	27020363	HT1376_K27ac_815		chr1	12290100	12291374	T1_H3K27ac_1_815		chr1	85740426	85743439	T3_H3K27ac_815		chr1	167904654	167906898	T4_H3K27ac_815		chr11	61732233	61741835	T5_H3K27ac_815
	chr1	25071848	25072747	RT4_K27ac_816		chr1	32014936	32015154	SW_K27ac_816		chr1	16532632	16533059	SC_K27ac_816		chr1	27022161	27023373	HT1376_K27ac_816		chr1	12375539	12376280	T1_H3K27ac_1_816		chr1	205717447	205719957	T3_H3K27ac_816		chr22	35653367	35654168	T4_H3K27ac_816		chr12	10364489	10367978	T5_H3K27ac_816
	chr1	25174716	25175246	RT4_K27ac_817		chr1	32027759	32028548	SW_K27ac_817		chr1	16533193	16534827	SC_K27ac_817		chr1	27023574	27024165	HT1376_K27ac_817		chr1	12376750	12377011	T1_H3K27ac_1_817		chr13	103247778	103250254	T3_H3K27ac_817		chr16	58662428	58664862	T4_H3K27ac_817		chr9	96212578	96213903	T5_H3K27ac_817
	chr1	25495049	25495527	RT4_K27ac_818		chr1	32028912	32029866	SW_K27ac_818		chr1	16534975	16535643	SC_K27ac_818		chr1	27032573	27033098	HT1376_K27ac_818		chr1	12379438	12379603	T1_H3K27ac_1_818		chr2	231576949	231579781	T3_H3K27ac_818		chr22	35695292	35698532	T4_H3K27ac_818		chr18	3245810	3250870	T5_H3K27ac_818
	chr1	25558544	25559731	RT4_K27ac_819		chr1	32030208	32030816	SW_K27ac_819		chr1	16544169	16544475	SC_K27ac_819		chr1	27052800	27053436	HT1376_K27ac_819		chr1	12392425	12392813	T1_H3K27ac_1_819		chr3	196228958	196231249	T3_H3K27ac_819		chr1	181001887	181003902	T4_H3K27ac_819		chr19	40926531	40928311	T5_H3K27ac_819
	chr1	25565767	25567077	RT4_K27ac_820		chr1	32038595	32039428	SW_K27ac_820		chr1	16563121	16564367	SC_K27ac_820		chr1	27113672	27115714	HT1376_K27ac_820		chr1	12396307	12396494	T1_H3K27ac_1_820		chr10	1101635	1103573	T3_H3K27ac_820		chr19	47776291	47777937	T4_H3K27ac_820		chr8	104426430	104427445	T5_H3K27ac_820
	chr1	25572897	25574042	RT4_K27ac_821		chr1	32039702	32043535	SW_K27ac_821		chr1	16574650	16576250	SC_K27ac_821		chr1	27126022	27127016	HT1376_K27ac_821		chr1	12405242	12405908	T1_H3K27ac_1_821		chr11	75268152	75276850	T3_H3K27ac_821		chr19	2235464	2237389	T4_H3K27ac_821		chr19	3359562	3361531	T5_H3K27ac_821
	chr1	25593886	25594416	RT4_K27ac_822		chr1	32044731	32045280	SW_K27ac_822		chr1	16647956	16648190	SC_K27ac_822		chr1	27132795	27133452	HT1376_K27ac_822		chr1	12436689	12437022	T1_H3K27ac_1_822		chr4	667300	669379	T3_H3K27ac_822		chr6	33242846	33246322	T4_H3K27ac_822		chr7	134831194	134834611	T5_H3K27ac_822
	chr1	25664229	25665438	RT4_K27ac_823		chr1	32047691	32048153	SW_K27ac_823		chr1	16651365	16651650	SC_K27ac_823		chr1	27152740	27153737	HT1376_K27ac_823		chr1	12437675	12437840	T1_H3K27ac_1_823		chr5	133338891	133342127	T3_H3K27ac_823		chr1	24967985	24970523	T4_H3K27ac_823		chr5	130969519	130972655	T5_H3K27ac_823
	chr1	25756795	25757222	RT4_K27ac_824		chr1	32053673	32055081	SW_K27ac_824		chr1	16661610	16661877	SC_K27ac_824		chr1	27168006	27168402	HT1376_K27ac_824		chr1	12440583	12441025	T1_H3K27ac_1_824		chr4	114680972	114684739	T3_H3K27ac_824		chr18	47012679	47014626	T4_H3K27ac_824		chr5	179125833	179127418	T5_H3K27ac_824
	chr1	25757409	25757832	RT4_K27ac_825		chr1	32056331	32056652	SW_K27ac_825		chr1	16662787	16663265	SC_K27ac_825		chr1	27174900	27176344	HT1376_K27ac_825		chr1	12441449	12441966	T1_H3K27ac_1_825		chr21	34913349	34916572	T3_H3K27ac_825		chr18	72263842	72266283	T4_H3K27ac_825		chr15	80214787	80217026	T5_H3K27ac_825
	chr1	25804040	25804446	RT4_K27ac_826		chr1	32083576	32083817	SW_K27ac_826		chr1	16673880	16674434	SC_K27ac_826		chr1	27180012	27181526	HT1376_K27ac_826		chr1	12442204	12442448	T1_H3K27ac_1_826		chr1	46215328	46217386	T3_H3K27ac_826		chr18	9135506	9139211	T4_H3K27ac_826		chr2	65355835	65357340	T5_H3K27ac_826
	chr1	25870033	25870636	RT4_K27ac_827		chr1	32109666	32111219	SW_K27ac_827		chr1	16674642	16675267	SC_K27ac_827		chr1	27187953	27189356	HT1376_K27ac_827		chr1	12442820	12443240	T1_H3K27ac_1_827		chr2	86848369	86851794	T3_H3K27ac_827		chr1	93644692	93646741	T4_H3K27ac_827		chr8	22297102	22302441	T5_H3K27ac_827
	chr1	25888823	25889128	RT4_K27ac_828		chr1	32226222	32226524	SW_K27ac_828		chr1	16675568	16677124	SC_K27ac_828		chr1	27189699	27190019	HT1376_K27ac_828		chr1	12443961	12444527	T1_H3K27ac_1_828		chr4	156873267	156875676	T3_H3K27ac_828		chr4	2936472	2937912	T4_H3K27ac_828		chr17	57863434	57870714	T5_H3K27ac_828
	chr1	25894559	25895735	RT4_K27ac_829		chr1	32254491	32254925	SW_K27ac_829		chr1	16677554	16679670	SC_K27ac_829		chr1	27190194	27191480	HT1376_K27ac_829		chr1	12444861	12445132	T1_H3K27ac_1_829		chr6	138186629	138195830	T3_H3K27ac_829		chr9	6006862	6008919	T4_H3K27ac_829		chr15	44083625	44086300	T5_H3K27ac_829
	chr1	26126845	26127249	RT4_K27ac_830		chr1	32263330	32264421	SW_K27ac_830		chr1	16693666	16695086	SC_K27ac_830		chr1	27191939	27192656	HT1376_K27ac_830		chr1	12445928	12446225	T1_H3K27ac_1_830		chr6	35225684	35229061	T3_H3K27ac_830		chr18	3246014	3249788	T4_H3K27ac_830		chr1	236027888	236032534	T5_H3K27ac_830
	chr1	26145978	26147370	RT4_K27ac_831		chr1	32264628	32265527	SW_K27ac_831		chr1	16699275	16699672	SC_K27ac_831		chr1	27199438	27199729	HT1376_K27ac_831		chr1	12446654	12447197	T1_H3K27ac_1_831		chr9	72870765	72875870	T3_H3K27ac_831		chr11	63741893	63743134	T4_H3K27ac_831		chr14	60557826	60560612	T5_H3K27ac_831
	chr1	26185125	26185956	RT4_K27ac_832		chr1	32400633	32401295	SW_K27ac_832		chr1	16711771	16712239	SC_K27ac_832		chr1	27203201	27204513	HT1376_K27ac_832		chr1	12480509	12480700	T1_H3K27ac_1_832		chr16	22308614	22311061	T3_H3K27ac_832		chr11	66885075	66889543	T4_H3K27ac_832		chr1	249131530	249133850	T5_H3K27ac_832
	chr1	26193378	26193855	RT4_K27ac_833		chr1	32401473	32401883	SW_K27ac_833		chr1	16712454	16712827	SC_K27ac_833		chr1	27215974	27217264	HT1376_K27ac_833		chr1	12483566	12483971	T1_H3K27ac_1_833		chr17	2496220	2499183	T3_H3K27ac_833		chr14	91579479	91583359	T4_H3K27ac_833		chr17	7476086	7477753	T5_H3K27ac_833
	chr1	26194045	26194904	RT4_K27ac_834		chr1	32402466	32403941	SW_K27ac_834		chr1	16717960	16718444	SC_K27ac_834		chr1	27226156	27227369	HT1376_K27ac_834		chr1	12493369	12494130	T1_H3K27ac_1_834		chr19	1939396	1944130	T3_H3K27ac_834		chr1	151042017	151043945	T4_H3K27ac_834		chr3	101291953	101294115	T5_H3K27ac_834
	chr1	26200966	26202511	RT4_K27ac_835		chr1	32405114	32405540	SW_K27ac_835		chr1	16718690	16718894	SC_K27ac_835		chr1	27233546	27234786	HT1376_K27ac_835		chr1	12495281	12495673	T1_H3K27ac_1_835		chr19	42773195	42777281	T3_H3K27ac_835		chr15	44084471	44085594	T4_H3K27ac_835		chr3	113414609	113416646	T5_H3K27ac_835
	chr1	26216197	26217757	RT4_K27ac_836		chr1	32409567	32409929	SW_K27ac_836		chr1	16766662	16768186	SC_K27ac_836		chr1	27247524	27248891	HT1376_K27ac_836		chr1	12496011	12497049	T1_H3K27ac_1_836		chr19	54369004	54373180	T3_H3K27ac_836		chr17	39805760	39812008	T4_H3K27ac_836		chr5	68389781	68391648	T5_H3K27ac_836
	chr1	26218926	26219356	RT4_K27ac_837		chr1	32410113	32410846	SW_K27ac_837		chr1	16768878	16769144	SC_K27ac_837		chr1	27285907	27286993	HT1376_K27ac_837		chr1	12497807	12498148	T1_H3K27ac_1_837		chr7	1569779	1579139	T3_H3K27ac_837		chr21	34696394	34698340	T4_H3K27ac_837		chr11	107879541	107881553	T5_H3K27ac_837
	chr1	26232084	26232960	RT4_K27ac_838		chr1	32417828	32418086	SW_K27ac_838		chr1	16825100	16825534	SC_K27ac_838		chr1	27325296	27326644	HT1376_K27ac_838		chr1	12505320	12505697	T1_H3K27ac_1_838		chr10	38298710	38300810	T3_H3K27ac_838		chr21	34774861	34777898	T4_H3K27ac_838		chr19	1130514	1134649	T5_H3K27ac_838
	chr1	26316431	26316979	RT4_K27ac_839		chr1	32419331	32421526	SW_K27ac_839		chr1	16825921	16826429	SC_K27ac_839		chr1	27334928	27335342	HT1376_K27ac_839		chr1	12508450	12509550	T1_H3K27ac_1_839		chr3	113414501	113417062	T3_H3K27ac_839		chr2	136742364	136744042	T4_H3K27ac_839		chr20	44716808	44719037	T5_H3K27ac_839
	chr1	26324064	26324679	RT4_K27ac_840		chr1	32421822	32423580	SW_K27ac_840		chr1	16939344	16940508	SC_K27ac_840		chr1	27335626	27336367	HT1376_K27ac_840		chr1	12509789	12510136	T1_H3K27ac_1_840		chr12	27089779	27092621	T3_H3K27ac_840		chr3	197517495	197519309	T4_H3K27ac_840		chr9	95525671	95528569	T5_H3K27ac_840
	chr1	26362052	26363573	RT4_K27ac_841		chr1	32479433	32480535	SW_K27ac_841		chr1	16950168	16951168	SC_K27ac_841		chr1	27337034	27337544	HT1376_K27ac_841		chr1	12510615	12510907	T1_H3K27ac_1_841		chr13	111804978	111807940	T3_H3K27ac_841		chr5	150459654	150462184	T4_H3K27ac_841		chr3	98240530	98242300	T5_H3K27ac_841
	chr1	26364258	26364541	RT4_K27ac_842		chr1	32573649	32574543	SW_K27ac_842		chr1	16970504	16971792	SC_K27ac_842		chr1	27339004	27339268	HT1376_K27ac_842		chr1	12513483	12514940	T1_H3K27ac_1_842		chr18	9100973	9107457	T3_H3K27ac_842		chr6	30523341	30525678	T4_H3K27ac_842		chr13	22177192	22178945	T5_H3K27ac_842
	chr1	26405328	26406231	RT4_K27ac_843		chr1	32645269	32645558	SW_K27ac_843		chr1	17027681	17027943	SC_K27ac_843		chr1	27339551	27340100	HT1376_K27ac_843		chr1	12517208	12517477	T1_H3K27ac_1_843		chr2	127412334	127417320	T3_H3K27ac_843		chr19	57790781	57792615	T4_H3K27ac_843		chr17	42294830	42300087	T5_H3K27ac_843
	chr1	26419115	26419808	RT4_K27ac_844		chr1	32645752	32646283	SW_K27ac_844		chr1	17054170	17054528	SC_K27ac_844		chr1	27357850	27358327	HT1376_K27ac_844		chr1	12518106	12518367	T1_H3K27ac_1_844		chr4	99180694	99184223	T3_H3K27ac_844		chr6	33544449	33548716	T4_H3K27ac_844		chr17	57912011	57915023	T5_H3K27ac_844
	chr1	26420247	26421032	RT4_K27ac_845		chr1	32670799	32671177	SW_K27ac_845		chr1	17215323	17216405	SC_K27ac_845		chr1	27425588	27426136	HT1376_K27ac_845		chr1	12518617	12518878	T1_H3K27ac_1_845		chr14	69441381	69447044	T3_H3K27ac_845		chr6	36513798	36516002	T4_H3K27ac_845		chr20	46129861	46132485	T5_H3K27ac_845
	chr1	26437219	26439279	RT4_K27ac_846		chr1	32671307	32671930	SW_K27ac_846		chr1	17221891	17222483	SC_K27ac_846		chr1	27438138	27439274	HT1376_K27ac_846		chr1	12521116	12521527	T1_H3K27ac_1_846		chr15	90930555	90933355	T3_H3K27ac_846		chr11	47787544	47788990	T4_H3K27ac_846		chr12	3066753	3070410	T5_H3K27ac_846
	chr1	26448430	26448956	RT4_K27ac_847		chr1	32687324	32688578	SW_K27ac_847		chr1	17223027	17223651	SC_K27ac_847		chr1	27468359	27469099	HT1376_K27ac_847		chr1	12523578	12523939	T1_H3K27ac_1_847		chr8	134304443	134311353	T3_H3K27ac_847		chr5	139781359	139782541	T4_H3K27ac_847		chr14	32544375	32548034	T5_H3K27ac_847
	chr1	26452768	26454154	RT4_K27ac_848		chr1	32757118	32757385	SW_K27ac_848		chr1	17230224	17231777	SC_K27ac_848		chr1	27469286	27470277	HT1376_K27ac_848		chr1	12524195	12524361	T1_H3K27ac_1_848		chr1	169861871	169863984	T3_H3K27ac_848		chr1	59247483	59251464	T4_H3K27ac_848		chr2	97202019	97206036	T5_H3K27ac_848
	chr1	26463832	26464154	RT4_K27ac_849		chr1	32757706	32758204	SW_K27ac_849		chr1	17240165	17240403	SC_K27ac_849		chr1	27470575	27470980	HT1376_K27ac_849		chr1	12525013	12525201	T1_H3K27ac_1_849		chr17	6914923	6920472	T3_H3K27ac_849		chr2	24148852	24150969	T4_H3K27ac_849		chr6	33755382	33757095	T5_H3K27ac_849
	chr1	26464569	26464854	RT4_K27ac_850		chr1	32801045	32801284	SW_K27ac_850		chr1	17240672	17241360	SC_K27ac_850		chr1	27480764	27482674	HT1376_K27ac_850		chr1	12530253	12530418	T1_H3K27ac_1_850		chr17	73177561	73179989	T3_H3K27ac_850		chr1	11864278	11867188	T4_H3K27ac_850		chr19	45349510	45352839	T5_H3K27ac_850
	chr1	26490775	26491165	RT4_K27ac_851		chr1	32817272	32817738	SW_K27ac_851		chr1	17251829	17252268	SC_K27ac_851		chr1	27487755	27488829	HT1376_K27ac_851		chr1	12532336	12532526	T1_H3K27ac_1_851		chr3	128367823	128370332	T3_H3K27ac_851		chr3	81809900	81811391	T4_H3K27ac_851		chr6	44354115	44356225	T5_H3K27ac_851
	chr1	26496053	26497040	RT4_K27ac_852		chr1	32859594	32859989	SW_K27ac_852		chr1	17256671	17256984	SC_K27ac_852		chr1	27492604	27493918	HT1376_K27ac_852		chr1	12535036	12535853	T1_H3K27ac_1_852		chr5	114877230	114881214	T3_H3K27ac_852		chr17	37355367	37357174	T4_H3K27ac_852		chr19	33863008	33865850	T5_H3K27ac_852
	chr1	26500775	26501569	RT4_K27ac_853		chr1	32951804	32952153	SW_K27ac_853		chr1	17274768	17275183	SC_K27ac_853		chr1	27518436	27519719	HT1376_K27ac_853		chr1	12536421	12536586	T1_H3K27ac_1_853		chr6	26020279	26023007	T3_H3K27ac_853		chr1	160988873	160992448	T4_H3K27ac_853		chr10	103576685	103579610	T5_H3K27ac_853
	chr1	26503583	26504703	RT4_K27ac_854		chr1	33115799	33116622	SW_K27ac_854		chr1	17275248	17275508	SC_K27ac_854		chr1	27560366	27560825	HT1376_K27ac_854		chr1	12537435	12539638	T1_H3K27ac_1_854		chr8	132915709	132917398	T3_H3K27ac_854		chr3	14988028	14990835	T4_H3K27ac_854		chr19	10379947	10383233	T5_H3K27ac_854
	chr1	26560601	26561674	RT4_K27ac_855		chr1	33116788	33117447	SW_K27ac_855		chr1	17306383	17308113	SC_K27ac_855		chr1	27561008	27561919	HT1376_K27ac_855		chr1	12539929	12541649	T1_H3K27ac_1_855		chr9	94186265	94188076	T3_H3K27ac_855		chr6	26020676	26022554	T4_H3K27ac_855		chr5	172482492	172485052	T5_H3K27ac_855
	chr1	26604100	26605005	RT4_K27ac_856		chr1	33207107	33207307	SW_K27ac_856		chr1	17330642	17331026	SC_K27ac_856		chr1	27562105	27562390	HT1376_K27ac_856		chr1	12565960	12566201	T1_H3K27ac_1_856		chr4	169238855	169240254	T3_H3K27ac_856		chr1	221915730	221917099	T4_H3K27ac_856		chr8	124548613	124554791	T5_H3K27ac_856
	chr1	26605256	26606898	RT4_K27ac_857		chr1	33207635	33208553	SW_K27ac_857		chr1	17337831	17338226	SC_K27ac_857		chr1	27573184	27574663	HT1376_K27ac_857		chr1	12570906	12571946	T1_H3K27ac_1_857		chr12	49657292	49660275	T3_H3K27ac_857		chr16	31127538	31130545	T4_H3K27ac_857		chr6	109701609	109704685	T5_H3K27ac_857
	chr1	26624202	26625351	RT4_K27ac_858		chr1	33219685	33221286	SW_K27ac_858		chr1	17338538	17338765	SC_K27ac_858		chr1	27607896	27608321	HT1376_K27ac_858		chr1	12576336	12576501	T1_H3K27ac_1_858		chr13	28022338	28026015	T3_H3K27ac_858		chr19	2426976	2428634	T4_H3K27ac_858		chr8	68254357	68256833	T5_H3K27ac_858
	chr1	26632502	26633102	RT4_K27ac_859		chr1	33223386	33224997	SW_K27ac_859		chr1	17379777	17380555	SC_K27ac_859		chr1	27648643	27649574	HT1376_K27ac_859		chr1	12587998	12588163	T1_H3K27ac_1_859		chr3	9833046	9835881	T3_H3K27ac_859		chr6	126277852	126278937	T4_H3K27ac_859		chr6	30522994	30526082	T5_H3K27ac_859
	chr1	26633575	26633923	RT4_K27ac_860		chr1	33225149	33225782	SW_K27ac_860		chr1	17454108	17454308	SC_K27ac_860		chr1	27657313	27657714	HT1376_K27ac_860		chr1	12588709	12589120	T1_H3K27ac_1_860		chr12	14921796	14925578	T3_H3K27ac_860		chr7	99095980	99098425	T4_H3K27ac_860		chr12	65561720	65564778	T5_H3K27ac_860
	chr1	26677982	26679038	RT4_K27ac_861		chr1	33225990	33227258	SW_K27ac_861		chr1	17454861	17455739	SC_K27ac_861		chr1	27667674	27670224	HT1376_K27ac_861		chr1	12599668	12599833	T1_H3K27ac_1_861		chr1	36687854	36691512	T3_H3K27ac_861		chr1	112161901	112164936	T4_H3K27ac_861		chr17	73974350	73979629	T5_H3K27ac_861
	chr1	26758262	26759338	RT4_K27ac_862		chr1	33282138	33283030	SW_K27ac_862		chr1	17494514	17495341	SC_K27ac_862		chr1	27675500	27675863	HT1376_K27ac_862		chr1	12601973	12602138	T1_H3K27ac_1_862		chr16	30667522	30673044	T3_H3K27ac_862		chr16	11889486	11892851	T4_H3K27ac_862		chr10	13141588	13143454	T5_H3K27ac_862
	chr1	26798903	26799548	RT4_K27ac_863		chr1	33283239	33283515	SW_K27ac_863		chr1	17515853	17517689	SC_K27ac_863		chr1	27692151	27693814	HT1376_K27ac_863		chr1	12608827	12609199	T1_H3K27ac_1_863		chr17	26988141	26990315	T3_H3K27ac_863		chr2	70519980	70521439	T4_H3K27ac_863		chr1	151027800	151033124	T5_H3K27ac_863
	chr1	26826850	26828195	RT4_K27ac_864		chr1	33429736	33429952	SW_K27ac_864		chr1	17517759	17518005	SC_K27ac_864		chr1	27709385	27709791	HT1376_K27ac_864		chr1	12609368	12609883	T1_H3K27ac_1_864		chr4	146653367	146658217	T3_H3K27ac_864		chr12	16034715	16036495	T4_H3K27ac_864		chr12	118497083	118501274	T5_H3K27ac_864
	chr1	26856262	26858686	RT4_K27ac_865		chr1	33430206	33430460	SW_K27ac_865		chr1	17519168	17519726	SC_K27ac_865		chr1	27719022	27719650	HT1376_K27ac_865		chr1	12613207	12613390	T1_H3K27ac_1_865		chr6	31164850	31167111	T3_H3K27ac_865		chr12	70635905	70638635	T4_H3K27ac_865		chr17	73838780	73843077	T5_H3K27ac_865
	chr1	26939634	26939952	RT4_K27ac_866		chr1	33454685	33454976	SW_K27ac_866		chr1	17534126	17535430	SC_K27ac_866		chr1	27759388	27759635	HT1376_K27ac_866		chr1	12616182	12616382	T1_H3K27ac_1_866		chr9	114244118	114247491	T3_H3K27ac_866		chr10	12083190	12086650	T4_H3K27ac_866		chr22	39101780	39103612	T5_H3K27ac_866
	chr1	26946466	26948403	RT4_K27ac_867		chr1	33457285	33457931	SW_K27ac_867		chr1	17536506	17537658	SC_K27ac_867		chr1	27763132	27763476	HT1376_K27ac_867		chr1	12651506	12651977	T1_H3K27ac_1_867		chrX	153231915	153240523	T3_H3K27ac_867		chr1	159891311	159896094	T4_H3K27ac_867		chr5	137088660	137091369	T5_H3K27ac_867
	chr1	27018813	27019491	RT4_K27ac_868		chr1	33458310	33458839	SW_K27ac_868		chr1	17538299	17539429	SC_K27ac_868		chr1	27793023	27793784	HT1376_K27ac_868		chr1	12654726	12655473	T1_H3K27ac_1_868		chr17	76332846	76342254	T3_H3K27ac_868		chr11	67052758	67058037	T4_H3K27ac_868		chr6	108878368	108883625	T5_H3K27ac_868
	chr1	27022169	27024163	RT4_K27ac_869		chr1	33501808	33502539	SW_K27ac_869		chr1	17541070	17542174	SC_K27ac_869		chr1	27793956	27794492	HT1376_K27ac_869		chr1	12655641	12655949	T1_H3K27ac_1_869		chr4	17811125	17812494	T3_H3K27ac_869		chr1	22350708	22353085	T4_H3K27ac_869		chr6	31366889	31370152	T5_H3K27ac_869
	chr1	27028358	27029035	RT4_K27ac_870		chr1	33564130	33564991	SW_K27ac_870		chr1	17542300	17542848	SC_K27ac_870		chr1	27806118	27806399	HT1376_K27ac_870		chr1	12656156	12656919	T1_H3K27ac_1_870		chr9	102580625	102586683	T3_H3K27ac_870		chr12	50134829	50136452	T4_H3K27ac_870		chr7	140623508	140625339	T5_H3K27ac_870
	chr1	27032497	27033409	RT4_K27ac_871		chr1	33592479	33592855	SW_K27ac_871		chr1	17552380	17553599	SC_K27ac_871		chr1	27816035	27817474	HT1376_K27ac_871		chr1	12657084	12657338	T1_H3K27ac_1_871		chr2	208392915	208397819	T3_H3K27ac_871		chr16	50775888	50777397	T4_H3K27ac_871		chr8	103664840	103671148	T5_H3K27ac_871
	chr1	27043145	27043445	RT4_K27ac_872		chr1	33593241	33594088	SW_K27ac_872		chr1	17555143	17555722	SC_K27ac_872		chr1	27825898	27826310	HT1376_K27ac_872		chr1	12657932	12658281	T1_H3K27ac_1_872		chr1	109234148	109237194	T3_H3K27ac_872		chr3	154040855	154042863	T4_H3K27ac_872		chr12	112563337	112569907	T5_H3K27ac_872
	chr1	27054016	27054537	RT4_K27ac_873		chr1	33615129	33615445	SW_K27ac_873		chr1	17556253	17556454	SC_K27ac_873		chr1	27826569	27827287	HT1376_K27ac_873		chr1	12659215	12660037	T1_H3K27ac_1_873		chr11	3857383	3863576	T3_H3K27ac_873		chr7	74070832	74076026	T4_H3K27ac_873		chr1	85038334	85041004	T5_H3K27ac_873
	chr1	27054904	27055344	RT4_K27ac_874		chr1	33616240	33616944	SW_K27ac_874		chr1	17558757	17560421	SC_K27ac_874		chr1	27830481	27830957	HT1376_K27ac_874		chr1	12664650	12664975	T1_H3K27ac_1_874		chr1	151960655	151967364	T3_H3K27ac_874		chr11	125461151	125462553	T4_H3K27ac_874		chr19	39138278	39142057	T5_H3K27ac_874
	chr1	27080050	27080661	RT4_K27ac_875		chr1	33646997	33647663	SW_K27ac_875		chr1	17560510	17560790	SC_K27ac_875		chr1	27831151	27832321	HT1376_K27ac_875		chr1	12675265	12677655	T1_H3K27ac_1_875		chr16	50774995	50780677	T3_H3K27ac_875		chr14	89881403	89883360	T4_H3K27ac_875		chr19	54973229	54976410	T5_H3K27ac_875
	chr1	27097746	27098293	RT4_K27ac_876		chr1	33684668	33686801	SW_K27ac_876		chr1	17560977	17561427	SC_K27ac_876		chr1	27853862	27855805	HT1376_K27ac_876		chr1	12677961	12679100	T1_H3K27ac_1_876		chr1	156426095	156428210	T3_H3K27ac_876		chr16	3506855	3509036	T4_H3K27ac_876		chr6	87864258	87866833	T5_H3K27ac_876
	chr1	27113791	27115765	RT4_K27ac_877		chr1	33686971	33687580	SW_K27ac_877		chr1	17564043	17564479	SC_K27ac_877		chr1	27865934	27867999	HT1376_K27ac_877		chr1	12679292	12679906	T1_H3K27ac_1_877		chr14	24582521	24585415	T3_H3K27ac_877		chr9	26946365	26948222	T4_H3K27ac_877		chr12	8122534	8124538	T5_H3K27ac_877
	chr1	27126413	27126966	RT4_K27ac_878		chr1	33721231	33721763	SW_K27ac_878		chr1	17572192	17572807	SC_K27ac_878		chr1	27868256	27869014	HT1376_K27ac_878		chr1	12803063	12803432	T1_H3K27ac_1_878		chr2	20099762	20102468	T3_H3K27ac_878		chr6	30293713	30295760	T4_H3K27ac_878		chr20	62204506	62206371	T5_H3K27ac_878
	chr1	27136970	27137335	RT4_K27ac_879		chr1	33722485	33723647	SW_K27ac_879		chr1	17575238	17575824	SC_K27ac_879		chr1	27869193	27870144	HT1376_K27ac_879		chr1	13178452	13178617	T1_H3K27ac_1_879		chr5	39072787	39075744	T3_H3K27ac_879		chr6	163833794	163838371	T4_H3K27ac_879		chr11	118442377	118444579	T5_H3K27ac_879
	chr1	27150814	27151217	RT4_K27ac_880		chr1	33723817	33724169	SW_K27ac_880		chr1	17576804	17577276	SC_K27ac_880		chr1	27883964	27885250	HT1376_K27ac_880		chr1	13788950	13789122	T1_H3K27ac_1_880		chr9	35656916	35663895	T3_H3K27ac_880		chr7	140623533	140625435	T4_H3K27ac_880		chr1	27018427	27025579	T5_H3K27ac_880
	chr1	27151415	27153056	RT4_K27ac_881		chr1	33804194	33804792	SW_K27ac_881		chr1	17577344	17578484	SC_K27ac_881		chr1	27895168	27895719	HT1376_K27ac_881		chr1	13887968	13888161	T1_H3K27ac_1_881		chr14	103851069	103854310	T3_H3K27ac_881		chr14	50064251	50066280	T4_H3K27ac_881		chr2	55843191	55844894	T5_H3K27ac_881
	chr1	27158032	27158403	RT4_K27ac_882		chr1	33805936	33806207	SW_K27ac_882		chr1	17601086	17601389	SC_K27ac_882		chr1	27901382	27902612	HT1376_K27ac_882		chr1	13910244	13911380	T1_H3K27ac_1_882		chr17	17584648	17591210	T3_H3K27ac_882		chr16	31885036	31885972	T4_H3K27ac_882		chr6	163833338	163839015	T5_H3K27ac_882
	chr1	27173865	27174488	RT4_K27ac_883		chr1	33806755	33807149	SW_K27ac_883		chr1	17615820	17616412	SC_K27ac_883		chr1	27916501	27916866	HT1376_K27ac_883		chr1	13912148	13912378	T1_H3K27ac_1_883		chr17	36954393	36957209	T3_H3K27ac_883		chr20	17945942	17951160	T4_H3K27ac_883		chr7	152161131	152162087	T5_H3K27ac_883
	chr1	27185205	27185826	RT4_K27ac_884		chr1	33807529	33807807	SW_K27ac_884		chr1	17618150	17618390	SC_K27ac_884		chr1	27920720	27921803	HT1376_K27ac_884		chr1	13914068	13914506	T1_H3K27ac_1_884		chr3	28387724	28391462	T3_H3K27ac_884		chr18	5237341	5238988	T4_H3K27ac_884		chr7	99155314	99157632	T5_H3K27ac_884
	chr1	27188476	27189346	RT4_K27ac_885		chr1	33812187	33812461	SW_K27ac_885		chr1	17620027	17620223	SC_K27ac_885		chr1	27928307	27930101	HT1376_K27ac_885		chr1	13915925	13916090	T1_H3K27ac_1_885		chr4	140096731	140100328	T3_H3K27ac_885		chr5	131829577	131834960	T4_H3K27ac_885		chr2	28112551	28114203	T5_H3K27ac_885
	chr1	27190350	27190730	RT4_K27ac_886		chr1	33812810	33815330	SW_K27ac_886		chr1	17624402	17624621	SC_K27ac_886		chr1	27930277	27930671	HT1376_K27ac_886		chr1	13916451	13916706	T1_H3K27ac_1_886		chr6	27803908	27807718	T3_H3K27ac_886		chr6	159289938	159291975	T4_H3K27ac_886		chr10	75531363	75533762	T5_H3K27ac_886
	chr1	27190933	27191478	RT4_K27ac_887		chr1	33815693	33816170	SW_K27ac_887		chr1	17625055	17625290	SC_K27ac_887		chr1	27976705	27978010	HT1376_K27ac_887		chr1	13919743	13919918	T1_H3K27ac_1_887		chr6	86351396	86355236	T3_H3K27ac_887		chr16	15068244	15070020	T4_H3K27ac_887		chr12	123942223	123944812	T5_H3K27ac_887
	chr1	27191914	27192348	RT4_K27ac_888		chr1	33938300	33938594	SW_K27ac_888		chr1	17630212	17631277	SC_K27ac_888		chr1	27984915	27987272	HT1376_K27ac_888		chr1	13920203	13920368	T1_H3K27ac_1_888		chr12	118497065	118501184	T3_H3K27ac_888		chr16	87983247	87986404	T4_H3K27ac_888		chr21	30670665	30675449	T5_H3K27ac_888
	chr1	27202883	27204598	RT4_K27ac_889		chr1	35219930	35221551	SW_K27ac_889		chr1	17674052	17675909	SC_K27ac_889		chr1	27997996	27998678	HT1376_K27ac_889		chr1	13920525	13921156	T1_H3K27ac_1_889		chr17	16187798	16192197	T3_H3K27ac_889		chr19	39887922	39890910	T4_H3K27ac_889		chr12	859578	865207	T5_H3K27ac_889
	chr1	27215981	27217131	RT4_K27ac_890		chr1	35222387	35222642	SW_K27ac_890		chr1	17692126	17692410	SC_K27ac_890		chr1	27998913	27999461	HT1376_K27ac_890		chr1	13925565	13925814	T1_H3K27ac_1_890		chr9	27570844	27574885	T3_H3K27ac_890		chr20	3800247	3802219	T4_H3K27ac_890		chr13	52376787	52379070	T5_H3K27ac_890
	chr1	27226171	27227391	RT4_K27ac_891		chr1	35225315	35226212	SW_K27ac_891		chr1	17695944	17696605	SC_K27ac_891		chr1	28021681	28023412	HT1376_K27ac_891		chr1	13926269	13926744	T1_H3K27ac_1_891		chr22	38596874	38602152	T3_H3K27ac_891		chr5	149789502	149793857	T4_H3K27ac_891		chr3	63849751	63851318	T5_H3K27ac_891
	chr1	27248183	27248872	RT4_K27ac_892		chr1	35227522	35229282	SW_K27ac_892		chr1	17752842	17753144	SC_K27ac_892		chr1	28051464	28052143	HT1376_K27ac_892		chr1	13926952	13927263	T1_H3K27ac_1_892		chr20	3800069	3802343	T3_H3K27ac_892		chr7	139875280	139877883	T4_H3K27ac_892		chr5	180648231	180652327	T5_H3K27ac_892
	chr1	27264619	27265103	RT4_K27ac_893		chr1	35229389	35230489	SW_K27ac_893		chr1	17764514	17764818	SC_K27ac_893		chr1	28052453	28053348	HT1376_K27ac_893		chr1	13931431	13931733	T1_H3K27ac_1_893		chr1	31191505	31193224	T3_H3K27ac_893		chr9	86321893	86323982	T4_H3K27ac_893		chr6	99872331	99874966	T5_H3K27ac_893
	chr1	27286143	27287377	RT4_K27ac_894		chr1	35245354	35248998	SW_K27ac_894		chr1	17764904	17766248	SC_K27ac_894		chr1	28098906	28099432	HT1376_K27ac_894		chr1	13932372	13933160	T1_H3K27ac_1_894		chr17	26661627	26664272	T3_H3K27ac_894		chr3	128368443	128370306	T4_H3K27ac_894		chr14	55594889	55598176	T5_H3K27ac_894
	chr1	27296491	27298065	RT4_K27ac_895		chr1	35290887	35291248	SW_K27ac_895		chr1	17766371	17770097	SC_K27ac_895		chr1	28099681	28100754	HT1376_K27ac_895		chr1	13942011	13942620	T1_H3K27ac_1_895		chr19	18392766	18394576	T3_H3K27ac_895		chr6	26155665	26160651	T4_H3K27ac_895		chr6	45344813	45346347	T5_H3K27ac_895
	chr1	27313068	27313702	RT4_K27ac_896		chr1	35303107	35303392	SW_K27ac_896		chr1	17770210	17770648	SC_K27ac_896		chr1	28112186	28113019	HT1376_K27ac_896		chr1	13942993	13943270	T1_H3K27ac_1_896		chr1	173836249	173839036	T3_H3K27ac_896		chr9	139438550	139441963	T4_H3K27ac_896		chr14	50085888	50089412	T5_H3K27ac_896
	chr1	27316771	27317643	RT4_K27ac_897		chr1	35316944	35317452	SW_K27ac_897		chr1	17786314	17787630	SC_K27ac_897		chr1	28156652	28157889	HT1376_K27ac_897		chr1	13943941	13944276	T1_H3K27ac_1_897		chr11	93516863	93518991	T3_H3K27ac_897		chr16	89785491	89789766	T4_H3K27ac_897		chr15	99992396	99996428	T5_H3K27ac_897
	chr1	27320217	27321077	RT4_K27ac_898		chr1	35324615	35325387	SW_K27ac_898		chr1	17814528	17814903	SC_K27ac_898		chr1	28189930	28190895	HT1376_K27ac_898		chr1	13944964	13945283	T1_H3K27ac_1_898		chr2	160469687	160473834	T3_H3K27ac_898		chr14	35450785	35452803	T4_H3K27ac_898		chr4	38664125	38665397	T5_H3K27ac_898
	chr1	27328385	27329030	RT4_K27ac_899		chr1	35450487	35451203	SW_K27ac_899		chr1	17817945	17818458	SC_K27ac_899		chr1	28201157	28202136	HT1376_K27ac_899		chr1	13946809	13947007	T1_H3K27ac_1_899		chr3	141594299	141597369	T3_H3K27ac_899		chr1	153755528	153756663	T4_H3K27ac_899		chr8	145021795	145028784	T5_H3K27ac_899
	chr1	27334856	27335263	RT4_K27ac_900		chr1	35496569	35497582	SW_K27ac_900		chr1	17818525	17818897	SC_K27ac_900		chr1	28240370	28241682	HT1376_K27ac_900		chr1	13965892	13966057	T1_H3K27ac_1_900		chr11	85774977	85781902	T3_H3K27ac_900		chr3	52311139	52313525	T4_H3K27ac_900		chr1	31191574	31192356	T5_H3K27ac_900
	chr1	27337133	27337467	RT4_K27ac_901		chr1	35544667	35545789	SW_K27ac_901		chr1	17846312	17846711	SC_K27ac_901		chr1	28272150	28272602	HT1376_K27ac_901		chr1	14025865	14027827	T1_H3K27ac_1_901		chr12	122709426	122710686	T3_H3K27ac_901		chr7	104581325	104586516	T4_H3K27ac_901		chr21	44394645	44396370	T5_H3K27ac_901
	chr1	27433136	27433598	RT4_K27ac_902		chr1	35657779	35658778	SW_K27ac_902		chr1	17846819	17847494	SC_K27ac_902		chr1	28285621	28286741	HT1376_K27ac_902		chr1	14029556	14029871	T1_H3K27ac_1_902		chr1	221913924	221917121	T3_H3K27ac_902		chr2	211034373	211036615	T4_H3K27ac_902		chr2	37382599	37385153	T5_H3K27ac_902
	chr1	27438820	27439229	RT4_K27ac_903		chr1	35734230	35735305	SW_K27ac_903		chr1	17865859	17866114	SC_K27ac_903		chr1	28293540	28293924	HT1376_K27ac_903		chr1	14034845	14035098	T1_H3K27ac_1_903		chr10	101378276	101383721	T3_H3K27ac_903		chr4	106393813	106395404	T4_H3K27ac_903		chr1	22107684	22110886	T5_H3K27ac_903
	chr1	27456942	27457422	RT4_K27ac_904		chr1	36022609	36023653	SW_K27ac_904		chr1	17866354	17867240	SC_K27ac_904		chr1	28294628	28295148	HT1376_K27ac_904		chr1	14051055	14051324	T1_H3K27ac_1_904		chr10	75531292	75533515	T3_H3K27ac_904		chr6	127587521	127589087	T4_H3K27ac_904		chr6	16758575	16764395	T5_H3K27ac_904
	chr1	27470654	27471007	RT4_K27ac_905		chr1	36023874	36024105	SW_K27ac_905		chr1	17871661	17871971	SC_K27ac_905		chr1	28295483	28295931	HT1376_K27ac_905		chr1	14056856	14057350	T1_H3K27ac_1_905		chr11	92929768	92931616	T3_H3K27ac_905		chr15	93445264	93450794	T4_H3K27ac_905		chr14	35182408	35184619	T5_H3K27ac_905
	chr1	27471178	27472957	RT4_K27ac_906		chr1	36106405	36107609	SW_K27ac_906		chr1	17877882	17878165	SC_K27ac_906		chr1	28414278	28415842	HT1376_K27ac_906		chr1	14057699	14058194	T1_H3K27ac_1_906		chr12	69003529	69007617	T3_H3K27ac_906		chr2	97150375	97153587	T4_H3K27ac_906		chr14	35514483	35516687	T5_H3K27ac_906
	chr1	27479349	27479543	RT4_K27ac_907		chr1	36184060	36184966	SW_K27ac_907		chr1	17879157	17880439	SC_K27ac_907		chr1	28484229	28484904	HT1376_K27ac_907		chr1	14058463	14058695	T1_H3K27ac_1_907		chr1	95389278	95395624	T3_H3K27ac_907		chr11	62647741	62650047	T4_H3K27ac_907		chr17	57695081	57698460	T5_H3K27ac_907
	chr1	27480572	27481618	RT4_K27ac_908		chr1	36234827	36235087	SW_K27ac_908		chr1	17880652	17881763	SC_K27ac_908		chr1	28496081	28496611	HT1376_K27ac_908		chr1	14075100	14076739	T1_H3K27ac_1_908		chr5	72111322	72114124	T3_H3K27ac_908		chr1	173836305	173838750	T4_H3K27ac_908		chr1	182358109	182362558	T5_H3K27ac_908
	chr1	27482014	27482519	RT4_K27ac_909		chr1	36235217	36235571	SW_K27ac_909		chr1	17882142	17882505	SC_K27ac_909		chr1	28517644	28517898	HT1376_K27ac_909		chr1	14078424	14078878	T1_H3K27ac_1_909		chr5	131821101	131827761	T3_H3K27ac_909		chr13	50068830	50071931	T4_H3K27ac_909		chr14	91974914	91977782	T5_H3K27ac_909
	chr1	27487727	27489025	RT4_K27ac_910		chr1	36274023	36274545	SW_K27ac_910		chr1	17884894	17889633	SC_K27ac_910		chr1	28519975	28520341	HT1376_K27ac_910		chr1	14082320	14082610	T1_H3K27ac_1_910		chr12	14926474	14929439	T3_H3K27ac_910		chr19	36629904	36633036	T4_H3K27ac_910		chr2	44587782	44589998	T5_H3K27ac_910
	chr1	27489232	27489657	RT4_K27ac_911		chr1	36348910	36349619	SW_K27ac_911		chr1	17895418	17897417	SC_K27ac_911		chr1	28520527	28521135	HT1376_K27ac_911		chr1	14083849	14084170	T1_H3K27ac_1_911		chr16	10837153	10839530	T3_H3K27ac_911		chr6	157097614	157102041	T4_H3K27ac_911		chr7	44529233	44530831	T5_H3K27ac_911
	chr1	27560948	27562180	RT4_K27ac_912		chr1	36395761	36397446	SW_K27ac_912		chr1	17908916	17909480	SC_K27ac_912		chr1	28558928	28559553	HT1376_K27ac_912		chr1	14086021	14086203	T1_H3K27ac_1_912		chr2	38602399	38605296	T3_H3K27ac_912		chr1	12040143	12041695	T4_H3K27ac_912		chr6	36353322	36356620	T5_H3K27ac_912
	chr1	27648662	27649653	RT4_K27ac_913		chr1	36500548	36501031	SW_K27ac_913		chr1	17913010	17913519	SC_K27ac_913		chr1	28561857	28562363	HT1376_K27ac_913		chr1	14088912	14089139	T1_H3K27ac_1_913		chr9	127630355	127633882	T3_H3K27ac_913		chr7	25163469	25165752	T4_H3K27ac_913		chr8	125383585	125385585	T5_H3K27ac_913
	chr1	27667621	27670195	RT4_K27ac_914		chr1	36554027	36554318	SW_K27ac_914		chr1	17914095	17915295	SC_K27ac_914		chr1	28562680	28563459	HT1376_K27ac_914		chr1	14089925	14090124	T1_H3K27ac_1_914		chr16	2013348	2016070	T3_H3K27ac_914		chr17	39812177	39818132	T4_H3K27ac_914		chr6	44093812	44096452	T5_H3K27ac_914
	chr1	27675251	27676079	RT4_K27ac_915		chr1	36554457	36555780	SW_K27ac_915		chr1	17922625	17924435	SC_K27ac_915		chr1	28573087	28573727	HT1376_K27ac_915		chr1	14092135	14092747	T1_H3K27ac_1_915		chr20	49545068	49549322	T3_H3K27ac_915		chr17	4849326	4854114	T4_H3K27ac_915		chr7	131011772	131014074	T5_H3K27ac_915
	chr1	27691622	27691929	RT4_K27ac_916		chr1	36600837	36601260	SW_K27ac_916		chr1	17962984	17963222	SC_K27ac_916		chr1	28575452	28576887	HT1376_K27ac_916		chr1	14094012	14094185	T1_H3K27ac_1_916		chr2	54341567	54343460	T3_H3K27ac_916		chr5	36875601	36879160	T4_H3K27ac_916		chr10	73607530	73612149	T5_H3K27ac_916
	chr1	27692157	27693497	RT4_K27ac_917		chr1	36601489	36601705	SW_K27ac_917		chr1	18192545	18193090	SC_K27ac_917		chr1	28585258	28585701	HT1376_K27ac_917		chr1	14102217	14102382	T1_H3K27ac_1_917		chr12	44198968	44201155	T3_H3K27ac_917		chr10	76586145	76587195	T4_H3K27ac_917		chr1	212458676	212460872	T5_H3K27ac_917
	chr1	27718905	27719337	RT4_K27ac_918		chr1	36614244	36615161	SW_K27ac_918		chr1	18200960	18201413	SC_K27ac_918		chr1	28586030	28587200	HT1376_K27ac_918		chr1	14108102	14108267	T1_H3K27ac_1_918		chr19	1130366	1135070	T3_H3K27ac_918		chr13	91999377	92001771	T4_H3K27ac_918		chr12	57503579	57506354	T5_H3K27ac_918
	chr1	27727877	27729171	RT4_K27ac_919		chr1	36615366	36617766	SW_K27ac_919		chr1	18973017	18973342	SC_K27ac_919		chr1	28639939	28641139	HT1376_K27ac_919		chr1	14110521	14110778	T1_H3K27ac_1_919		chr5	154133094	154137781	T3_H3K27ac_919		chr2	70350112	70353047	T4_H3K27ac_919		chr1	55678837	55682316	T5_H3K27ac_919
	chr1	27739416	27741083	RT4_K27ac_920		chr1	36620713	36623699	SW_K27ac_920		chr1	18995451	18996115	SC_K27ac_920		chr1	28654702	28656368	HT1376_K27ac_920		chr1	14124514	14124891	T1_H3K27ac_1_920		chr7	72299961	72301557	T3_H3K27ac_920		chr20	48767678	48771295	T4_H3K27ac_920		chr16	30709397	30711442	T5_H3K27ac_920
	chr1	27757900	27758156	RT4_K27ac_921		chr1	36625378	36625824	SW_K27ac_921		chr1	18997054	18997405	SC_K27ac_921		chr1	28668469	28668919	HT1376_K27ac_921		chr1	14125110	14125327	T1_H3K27ac_1_921		chr3	113462175	113467255	T3_H3K27ac_921		chr3	156542987	156545225	T4_H3K27ac_921		chr16	57018947	57026532	T5_H3K27ac_921
	chr1	27762472	27763050	RT4_K27ac_922		chr1	36626235	36627966	SW_K27ac_922		chr1	19212678	19213444	SC_K27ac_922		chr1	28670201	28670727	HT1376_K27ac_922		chr1	14125627	14126175	T1_H3K27ac_1_922		chr12	16034472	16036787	T3_H3K27ac_922		chr11	62598345	62600590	T4_H3K27ac_922		chr16	75680514	75684013	T5_H3K27ac_922
	chr1	27763229	27763551	RT4_K27ac_923		chr1	36637962	36638174	SW_K27ac_923		chr1	19213582	19213852	SC_K27ac_923		chr1	28677818	28679336	HT1376_K27ac_923		chr1	14126373	14127665	T1_H3K27ac_1_923		chr2	64067442	64070762	T3_H3K27ac_923		chr22	38709100	38713287	T4_H3K27ac_923		chr17	74261353	74269544	T5_H3K27ac_923
	chr1	27781813	27782239	RT4_K27ac_924		chr1	36640848	36641060	SW_K27ac_924		chr1	19228578	19229820	SC_K27ac_924		chr1	28695876	28697056	HT1376_K27ac_924		chr1	14128077	14128740	T1_H3K27ac_1_924		chr16	81039255	81041932	T3_H3K27ac_924		chr2	25015515	25016687	T4_H3K27ac_924		chr18	3260397	3264002	T5_H3K27ac_924
	chr1	27809776	27810129	RT4_K27ac_925		chr1	36653282	36653811	SW_K27ac_925		chr1	19239483	19240299	SC_K27ac_925		chr1	28718134	28718931	HT1376_K27ac_925		chr1	14155594	14155932	T1_H3K27ac_1_925		chr19	2163073	2166167	T3_H3K27ac_925		chr17	73200883	73202542	T4_H3K27ac_925		chr19	12661174	12663466	T5_H3K27ac_925
	chr1	27816029	27817525	RT4_K27ac_926		chr1	36689147	36689725	SW_K27ac_926		chr1	19249026	19249310	SC_K27ac_926		chr1	28736529	28736780	HT1376_K27ac_926		chr1	14276592	14276842	T1_H3K27ac_1_926		chr19	10611932	10614399	T3_H3K27ac_926		chr22	45558259	45561216	T4_H3K27ac_926		chr2	187453166	187457474	T5_H3K27ac_926
	chr1	27825956	27826332	RT4_K27ac_927		chr1	36690015	36690602	SW_K27ac_927		chr1	19249383	19250342	SC_K27ac_927		chr1	28743584	28744959	HT1376_K27ac_927		chr1	14468832	14469186	T1_H3K27ac_1_927		chr19	49955689	49957946	T3_H3K27ac_927		chr6	12010176	12013688	T4_H3K27ac_927		chr12	27228432	27236306	T5_H3K27ac_927
	chr1	27830457	27832400	RT4_K27ac_928		chr1	36690704	36690981	SW_K27ac_928		chr1	19250536	19250968	SC_K27ac_928		chr1	28763747	28765044	HT1376_K27ac_928		chr1	14470395	14470560	T1_H3K27ac_1_928		chr10	74054844	74059694	T3_H3K27ac_928		chr12	90101724	90104123	T4_H3K27ac_928		chr6	34663044	34665792	T5_H3K27ac_928
	chr1	27848569	27849001	RT4_K27ac_929		chr1	36713599	36713864	SW_K27ac_929		chr1	19251586	19252033	SC_K27ac_929		chr1	28776026	28776796	HT1376_K27ac_929		chr1	14535348	14535513	T1_H3K27ac_1_929		chr1	154908178	154911597	T3_H3K27ac_929		chr17	42294946	42299659	T4_H3K27ac_929		chr1	111505491	111507347	T5_H3K27ac_929
	chr1	27849163	27850156	RT4_K27ac_930		chr1	36723426	36724277	SW_K27ac_930		chr1	19252621	19255269	SC_K27ac_930		chr1	28781983	28782365	HT1376_K27ac_930		chr1	14608948	14609113	T1_H3K27ac_1_930		chr11	61196169	61198385	T3_H3K27ac_930		chr10	38146096	38147283	T4_H3K27ac_930		chr15	72517764	72525591	T5_H3K27ac_930
	chr1	27868266	27870012	RT4_K27ac_931		chr1	36766340	36766625	SW_K27ac_931		chr1	19255915	19256494	SC_K27ac_931		chr1	28827093	28827689	HT1376_K27ac_931		chr1	14843485	14843761	T1_H3K27ac_1_931		chr4	39459115	39461781	T3_H3K27ac_931		chr1	161013527	161018479	T4_H3K27ac_931		chr17	45973502	45975207	T5_H3K27ac_931
	chr1	27884592	27885087	RT4_K27ac_932		chr1	36771742	36772524	SW_K27ac_932		chr1	19259178	19259572	SC_K27ac_932		chr1	28831955	28832285	HT1376_K27ac_932		chr1	14848678	14848863	T1_H3K27ac_1_932		chr15	51055945	51058620	T3_H3K27ac_932		chr1	235489896	235491630	T4_H3K27ac_932		chr10	5854272	5857112	T5_H3K27ac_932
	chr1	27895189	27895478	RT4_K27ac_933		chr1	36788851	36789105	SW_K27ac_933		chr1	19261762	19261998	SC_K27ac_933		chr1	28832661	28834640	HT1376_K27ac_933		chr1	14849708	14850097	T1_H3K27ac_1_933		chr1	6659312	6665369	T3_H3K27ac_933		chr17	38136220	38137796	T4_H3K27ac_933		chr12	7242931	7245900	T5_H3K27ac_933
	chr1	27897055	27897625	RT4_K27ac_934		chr1	36808652	36809690	SW_K27ac_934		chr1	19262747	19263093	SC_K27ac_934		chr1	28834909	28835311	HT1376_K27ac_934		chr1	14925316	14926127	T1_H3K27ac_1_934		chr2	54195850	54199666	T3_H3K27ac_934		chr19	39138242	39144046	T4_H3K27ac_934		chr18	9100315	9105522	T5_H3K27ac_934
	chr1	27916514	27916952	RT4_K27ac_935		chr1	36809864	36810152	SW_K27ac_935		chr1	19263420	19265996	SC_K27ac_935		chr1	28835795	28836102	HT1376_K27ac_935		chr1	14928604	14928910	T1_H3K27ac_1_935		chr4	38663942	38677221	T3_H3K27ac_935		chr3	183415239	183416557	T4_H3K27ac_935		chr7	44923124	44927026	T5_H3K27ac_935
	chr1	27928244	27928881	RT4_K27ac_936		chr1	36815206	36819379	SW_K27ac_936		chr1	19266110	19266961	SC_K27ac_936		chr1	28844678	28845862	HT1376_K27ac_936		chr1	14953002	14953205	T1_H3K27ac_1_936		chr19	58896667	58899492	T3_H3K27ac_936		chr3	148708981	148710454	T4_H3K27ac_936		chr11	85954436	85957596	T5_H3K27ac_936
	chr1	27929693	27930120	RT4_K27ac_937		chr1	36838310	36839303	SW_K27ac_937		chr1	19267237	19268838	SC_K27ac_937		chr1	28852291	28854110	HT1376_K27ac_937		chr1	14953492	14953883	T1_H3K27ac_1_937		chr17	28443354	28445103	T3_H3K27ac_937		chr15	45016725	45023678	T4_H3K27ac_937		chr2	198379495	198382133	T5_H3K27ac_937
	chr1	27930274	27930628	RT4_K27ac_938		chr1	36839537	36840218	SW_K27ac_938		chr1	19269390	19270204	SC_K27ac_938		chr1	28878863	28879370	HT1376_K27ac_938		chr1	15058875	15059059	T1_H3K27ac_1_938		chr11	108336941	108338859	T3_H3K27ac_938		chr19	50353472	50355733	T4_H3K27ac_938		chr17	38276741	38280670	T5_H3K27ac_938
	chr1	27951051	27952728	RT4_K27ac_939		chr1	36840568	36841013	SW_K27ac_939		chr1	19270288	19270510	SC_K27ac_939		chr1	28879584	28880763	HT1376_K27ac_939		chr1	15059443	15059721	T1_H3K27ac_1_939		chr11	808176	810828	T3_H3K27ac_939		chr3	184032326	184034729	T4_H3K27ac_939		chr13	32999659	33004001	T5_H3K27ac_939
	chr1	27986190	27986587	RT4_K27ac_940		chr1	36846129	36846449	SW_K27ac_940		chr1	19273398	19275010	SC_K27ac_940		chr1	28907500	28909745	HT1376_K27ac_940		chr1	15163342	15163507	T1_H3K27ac_1_940		chr14	32544696	32547650	T3_H3K27ac_940		chr6	143264955	143269412	T4_H3K27ac_940		chr1	40626389	40628425	T5_H3K27ac_940
	chr1	27998844	27999458	RT4_K27ac_941		chr1	36850247	36851540	SW_K27ac_941		chr1	19275277	19278997	SC_K27ac_941		chr1	28927933	28929235	HT1376_K27ac_941		chr1	15165694	15165860	T1_H3K27ac_1_941		chr6	4020615	4024297	T3_H3K27ac_941		chr18	12701725	12703543	T4_H3K27ac_941		chr16	88846657	88852361	T5_H3K27ac_941
	chr1	28021920	28022931	RT4_K27ac_942		chr1	36851727	36853271	SW_K27ac_942		chr1	19279161	19279918	SC_K27ac_942		chr1	28968823	28970423	HT1376_K27ac_942		chr1	15169875	15170129	T1_H3K27ac_1_942		chr2	145264937	145278634	T3_H3K27ac_942		chr16	30620973	30622054	T4_H3K27ac_942		chr19	39880802	39882690	T5_H3K27ac_942
	chr1	28051605	28052131	RT4_K27ac_943		chr1	36862935	36863507	SW_K27ac_943		chr1	19280385	19282811	SC_K27ac_943		chr1	28974321	28975184	HT1376_K27ac_943		chr1	15207952	15208519	T1_H3K27ac_1_943		chr2	70416946	70418616	T3_H3K27ac_943		chr6	27111757	27115918	T4_H3K27ac_943		chr2	128567262	128569348	T5_H3K27ac_943
	chr1	28052405	28053327	RT4_K27ac_944		chr1	36886651	36887206	SW_K27ac_944		chr1	19282864	19283163	SC_K27ac_944		chr1	28975349	28976078	HT1376_K27ac_944		chr1	15236815	15238524	T1_H3K27ac_1_944		chr10	74033652	74038301	T3_H3K27ac_944		chr10	105880010	105882357	T4_H3K27ac_944		chr2	224807945	224810346	T5_H3K27ac_944
	chr1	28099287	28100450	RT4_K27ac_945		chr1	36901931	36902327	SW_K27ac_945		chr1	19283353	19284002	SC_K27ac_945		chr1	28994737	28995332	HT1376_K27ac_945		chr1	15239463	15240269	T1_H3K27ac_1_945		chr1	161367595	161370590	T3_H3K27ac_945		chr11	68038250	68040786	T4_H3K27ac_945		chr2	86422177	86423581	T5_H3K27ac_945
	chr1	28110369	28111112	RT4_K27ac_946		chr1	36903188	36903485	SW_K27ac_946		chr1	19323386	19326362	SC_K27ac_946		chr1	28995563	28996452	HT1376_K27ac_946		chr1	15240480	15240890	T1_H3K27ac_1_946		chr15	68562946	68574864	T3_H3K27ac_946		chr10	63659174	63664580	T4_H3K27ac_946		chr6	116691048	116693575	T5_H3K27ac_946
	chr1	28111761	28113002	RT4_K27ac_947		chr1	36915536	36916732	SW_K27ac_947		chr1	19332277	19332493	SC_K27ac_947		chr1	29034438	29034786	HT1376_K27ac_947		chr1	15251117	15251517	T1_H3K27ac_1_947		chr17	7151890	7156833	T3_H3K27ac_947		chr1	109234282	109236361	T4_H3K27ac_947		chr7	142493888	142500519	T5_H3K27ac_947
	chr1	28123789	28124112	RT4_K27ac_948		chr1	36929122	36930475	SW_K27ac_948		chr1	19333111	19333279	SC_K27ac_948		chr1	29047179	29048885	HT1376_K27ac_948		chr1	15266964	15267129	T1_H3K27ac_1_948		chr10	90748424	90754206	T3_H3K27ac_948		chr12	120729597	120731375	T4_H3K27ac_948		chrX	153624621	153627749	T5_H3K27ac_948
	chr1	28139207	28139621	RT4_K27ac_949		chr1	37936898	37937883	SW_K27ac_949		chr1	19333695	19335071	SC_K27ac_949		chr1	29062683	29064386	HT1376_K27ac_949		chr1	15269758	15270071	T1_H3K27ac_1_949		chr12	100660137	100662171	T3_H3K27ac_949		chr13	77600221	77601808	T4_H3K27ac_949		chr17	10599914	10601964	T5_H3K27ac_949
	chr1	28156730	28158250	RT4_K27ac_950		chr1	37940242	37945337	SW_K27ac_950		chr1	19335374	19339639	SC_K27ac_950		chr1	29076606	29078023	HT1376_K27ac_950		chr1	15270865	15273879	T1_H3K27ac_1_950		chr19	15440771	15444036	T3_H3K27ac_950		chr1	52343056	52345668	T4_H3K27ac_950		chr1	115297792	115301479	T5_H3K27ac_950
	chr1	28170480	28170681	RT4_K27ac_951		chr1	37945454	37947660	SW_K27ac_951		chr1	19340197	19340789	SC_K27ac_951		chr1	29089618	29089830	HT1376_K27ac_951		chr1	15295361	15295627	T1_H3K27ac_1_951		chr22	24949463	24952795	T3_H3K27ac_951		chr15	69109394	69114474	T4_H3K27ac_951		chr2	70370038	70371062	T5_H3K27ac_951
	chr1	28177811	28178177	RT4_K27ac_952		chr1	37948376	37949797	SW_K27ac_952		chr1	19354633	19354950	SC_K27ac_952		chr1	29101522	29102323	HT1376_K27ac_952		chr1	15305545	15305892	T1_H3K27ac_1_952		chr3	137905484	137907835	T3_H3K27ac_952		chr19	40948573	40951180	T4_H3K27ac_952		chr12	25537670	25540434	T5_H3K27ac_952
	chr1	28190563	28191417	RT4_K27ac_953		chr1	37950072	37950561	SW_K27ac_953		chr1	19355300	19355897	SC_K27ac_953		chr1	29196928	29197197	HT1376_K27ac_953		chr1	15342108	15342273	T1_H3K27ac_1_953		chr3	185303473	185304968	T3_H3K27ac_953		chr3	196594044	196596328	T4_H3K27ac_953		chr12	58288189	58294042	T5_H3K27ac_953
	chr1	28195129	28196155	RT4_K27ac_954		chr1	37951990	37952991	SW_K27ac_954		chr1	19356019	19356975	SC_K27ac_954		chr1	29204898	29205243	HT1376_K27ac_954		chr1	15347274	15347792	T1_H3K27ac_1_954		chr9	2014029	2019528	T3_H3K27ac_954		chr6	26169915	26173946	T4_H3K27ac_954		chr14	23563450	23565691	T5_H3K27ac_954
	chr1	28201422	28201799	RT4_K27ac_955		chr1	37979541	37980315	SW_K27ac_955		chr1	19357914	19358102	SC_K27ac_955		chr1	29211202	29211541	HT1376_K27ac_955		chr1	15354259	15354524	T1_H3K27ac_1_955		chr11	116966095	116970709	T3_H3K27ac_955		chr6	28863061	28865472	T4_H3K27ac_955		chr12	8979115	8981625	T5_H3K27ac_955
	chr1	28219028	28219569	RT4_K27ac_956		chr1	37980457	37980741	SW_K27ac_956		chr1	19358714	19359087	SC_K27ac_956		chr1	29213299	29214579	HT1376_K27ac_956		chr1	15415446	15415775	T1_H3K27ac_1_956		chr8	141643409	141647035	T3_H3K27ac_956		chr1	176174712	176177512	T4_H3K27ac_956		chr11	311634	318130	T5_H3K27ac_956
	chr1	28240494	28241604	RT4_K27ac_957		chr1	38000411	38000765	SW_K27ac_957		chr1	19359291	19362554	SC_K27ac_957		chr1	29240271	29241503	HT1376_K27ac_957		chr1	15415954	15416152	T1_H3K27ac_1_957		chr8	42125604	42130352	T3_H3K27ac_957		chr12	94070722	94072214	T4_H3K27ac_957		chr7	74070656	74075443	T5_H3K27ac_957
	chr1	28261305	28262049	RT4_K27ac_958		chr1	38019243	38019937	SW_K27ac_958		chr1	19362687	19362870	SC_K27ac_958		chr1	29241701	29241989	HT1376_K27ac_958		chr1	15466423	15466706	T1_H3K27ac_1_958		chrX	110924347	110925674	T3_H3K27ac_958		chr15	59224236	59227205	T4_H3K27ac_958		chr17	42143156	42144853	T5_H3K27ac_958
	chr1	28285543	28286904	RT4_K27ac_959		chr1	38060793	38061985	SW_K27ac_959		chr1	19399904	19400441	SC_K27ac_959		chr1	29254243	29255019	HT1376_K27ac_959		chr1	15468285	15468736	T1_H3K27ac_1_959		chr16	283850	286133	T3_H3K27ac_959		chr16	30346116	30347232	T4_H3K27ac_959		chr13	29232393	29234542	T5_H3K27ac_959
	chr1	28294657	28295718	RT4_K27ac_960		chr1	38155296	38155514	SW_K27ac_960		chr1	19400519	19400778	SC_K27ac_960		chr1	29259772	29260385	HT1376_K27ac_960		chr1	15468901	15469392	T1_H3K27ac_1_960		chr2	85196222	85200782	T3_H3K27ac_960		chr17	2496076	2498551	T4_H3K27ac_960		chr20	47891716	47896659	T5_H3K27ac_960
	chr1	28414242	28415792	RT4_K27ac_961		chr1	38155702	38156161	SW_K27ac_961		chr1	19407785	19407962	SC_K27ac_961		chr1	29276559	29277402	HT1376_K27ac_961		chr1	15477697	15478082	T1_H3K27ac_1_961		chr6	87864248	87866614	T3_H3K27ac_961		chr18	32923550	32924893	T4_H3K27ac_961		chr8	141645876	141646590	T5_H3K27ac_961
	chr1	28442881	28443084	RT4_K27ac_962		chr1	38157167	38157908	SW_K27ac_962		chr1	19535841	19536812	SC_K27ac_962		chr1	29292052	29293409	HT1376_K27ac_962		chr1	15478416	15481839	T1_H3K27ac_1_962		chr2	74404913	74406536	T3_H3K27ac_962		chr18	54304594	54306646	T4_H3K27ac_962		chr17	1301619	1304153	T5_H3K27ac_962
	chr1	28449910	28450640	RT4_K27ac_963		chr1	38158216	38158613	SW_K27ac_963		chr1	19536872	19537724	SC_K27ac_963		chr1	29298441	29298878	HT1376_K27ac_963		chr1	15482075	15483806	T1_H3K27ac_1_963		chr11	66884855	66890030	T3_H3K27ac_963		chr19	4066018	4068678	T4_H3K27ac_963		chr19	41869199	41870904	T5_H3K27ac_963
	chr1	28498785	28499319	RT4_K27ac_964		chr1	38259500	38259678	SW_K27ac_964		chr1	19577383	19579421	SC_K27ac_964		chr1	29299136	29299499	HT1376_K27ac_964		chr1	15484027	15485284	T1_H3K27ac_1_964		chr13	99225579	99229289	T3_H3K27ac_964		chr4	174253926	174255630	T4_H3K27ac_964		chr15	60683116	60691126	T5_H3K27ac_964
	chr1	28517123	28517659	RT4_K27ac_965		chr1	38260143	38260640	SW_K27ac_965		chr1	19637765	19638599	SC_K27ac_965		chr1	29299683	29301692	HT1376_K27ac_965		chr1	15485449	15486833	T1_H3K27ac_1_965		chr3	3167768	3170267	T3_H3K27ac_965		chr9	88966868	88969923	T4_H3K27ac_965		chr14	39571412	39573245	T5_H3K27ac_965
	chr1	28520038	28521279	RT4_K27ac_966		chr1	38272852	38274493	SW_K27ac_966		chr1	19638775	19639518	SC_K27ac_966		chr1	29481716	29481915	HT1376_K27ac_966		chr1	15492848	15493013	T1_H3K27ac_1_966		chr14	35450017	35453279	T3_H3K27ac_966		chr15	90930816	90932989	T4_H3K27ac_966		chr17	4045329	4048093	T5_H3K27ac_966
	chr1	28523281	28523657	RT4_K27ac_967		chr1	38324565	38325285	SW_K27ac_967		chr1	19641732	19642116	SC_K27ac_967		chr1	29483284	29483625	HT1376_K27ac_967		chr1	15493569	15493807	T1_H3K27ac_1_967		chr1	228674118	228676531	T3_H3K27ac_967		chr3	152877637	152882259	T4_H3K27ac_967		chr19	41767575	41769737	T5_H3K27ac_967
	chr1	28547109	28547538	RT4_K27ac_968		chr1	38325408	38325898	SW_K27ac_968		chr1	19688376	19689056	SC_K27ac_968		chr1	29490535	29490728	HT1376_K27ac_968		chr1	15494752	15495929	T1_H3K27ac_1_968		chr13	32888305	32890681	T3_H3K27ac_968		chr20	30945530	30947245	T4_H3K27ac_968		chr7	1199357	1201126	T5_H3K27ac_968
	chr1	28558978	28559574	RT4_K27ac_969		chr1	38331336	38331810	SW_K27ac_969		chr1	19721993	19722307	SC_K27ac_969		chr1	29507485	29508471	HT1376_K27ac_969		chr1	15497352	15498071	T1_H3K27ac_1_969		chr21	34696407	34698325	T3_H3K27ac_969		chr11	8984829	8987158	T4_H3K27ac_969		chr9	102580863	102586745	T5_H3K27ac_969
	chr1	28562630	28563325	RT4_K27ac_970		chr1	38396874	38397416	SW_K27ac_970		chr1	19756035	19756721	SC_K27ac_970		chr1	29517334	29518911	HT1376_K27ac_970		chr1	15498226	15498781	T1_H3K27ac_1_970		chr2	20549458	20552642	T3_H3K27ac_970		chr1	242010959	242011799	T4_H3K27ac_970		chr1	52342964	52345293	T5_H3K27ac_970
	chr1	28568282	28569035	RT4_K27ac_971		chr1	38464679	38466280	SW_K27ac_971		chr1	19761655	19761936	SC_K27ac_971		chr1	29528453	29529431	HT1376_K27ac_971		chr1	15499007	15499997	T1_H3K27ac_1_971		chr4	185392305	185397427	T3_H3K27ac_971		chr17	8064971	8067040	T4_H3K27ac_971		chr4	15654765	15658229	T5_H3K27ac_971
	chr1	28573044	28573800	RT4_K27ac_972		chr1	38466382	38466991	SW_K27ac_972		chr1	19762468	19762901	SC_K27ac_972		chr1	29553391	29554723	HT1376_K27ac_972		chr1	15500297	15500984	T1_H3K27ac_1_972		chr5	132386237	132389058	T3_H3K27ac_972		chr3	48506294	48510156	T4_H3K27ac_972		chr16	67595336	67598436	T5_H3K27ac_972
	chr1	28574052	28574987	RT4_K27ac_973		chr1	38478160	38479211	SW_K27ac_973		chr1	19763150	19763597	SC_K27ac_973		chr1	29556858	29557727	HT1376_K27ac_973		chr1	15504567	15506364	T1_H3K27ac_1_973		chr5	68389793	68391190	T3_H3K27ac_973		chr19	56110217	56112724	T4_H3K27ac_973		chr19	2268550	2271783	T5_H3K27ac_973
	chr1	28575482	28575837	RT4_K27ac_974		chr1	38493043	38493503	SW_K27ac_974		chr1	19763797	19764630	SC_K27ac_974		chr1	29563717	29564265	HT1376_K27ac_974		chr1	15506540	15507043	T1_H3K27ac_1_974		chr1	16009374	16012442	T3_H3K27ac_974		chr19	39925412	39927515	T4_H3K27ac_974		chr2	101921101	101925786	T5_H3K27ac_974
	chr1	28586002	28587172	RT4_K27ac_975		chr1	38494180	38495872	SW_K27ac_975		chr1	19765044	19765405	SC_K27ac_975		chr1	29564422	29565837	HT1376_K27ac_975		chr1	15508580	15508901	T1_H3K27ac_1_975		chr1	26798172	26800129	T3_H3K27ac_975		chr11	68227361	68229500	T4_H3K27ac_975		chr3	122281565	122284918	T5_H3K27ac_975
	chr1	28623205	28623463	RT4_K27ac_976		chr1	38496196	38497286	SW_K27ac_976		chr1	19765956	19766982	SC_K27ac_976		chr1	29566076	29566656	HT1376_K27ac_976		chr1	15514729	15515255	T1_H3K27ac_1_976		chr15	44827903	44830828	T3_H3K27ac_976		chr6	138187066	138192753	T4_H3K27ac_976		chr7	27778727	27781650	T5_H3K27ac_976
	chr1	28639750	28640909	RT4_K27ac_977		chr1	38513238	38513416	SW_K27ac_977		chr1	19767574	19767816	SC_K27ac_977		chr1	29575641	29576742	HT1376_K27ac_977		chr1	15523411	15523700	T1_H3K27ac_1_977		chr15	45878494	45880910	T3_H3K27ac_977		chr12	93321459	93324120	T4_H3K27ac_977		chr16	87424494	87426988	T5_H3K27ac_977
	chr1	28655485	28656434	RT4_K27ac_978		chr1	38513860	38514294	SW_K27ac_978		chr1	19774112	19775062	SC_K27ac_978		chr1	29584204	29584510	HT1376_K27ac_978		chr1	15523915	15527155	T1_H3K27ac_1_978		chr5	72793576	72795434	T3_H3K27ac_978		chr9	123604477	123606272	T4_H3K27ac_978		chr12	110886924	110888505	T5_H3K27ac_978
	chr1	28672304	28672905	RT4_K27ac_979		chr1	38592123	38592483	SW_K27ac_979		chr1	19775177	19776489	SC_K27ac_979		chr1	29597189	29597437	HT1376_K27ac_979		chr1	15527317	15528519	T1_H3K27ac_1_979		chr6	37137910	37140104	T3_H3K27ac_979		chr17	6915338	6919571	T4_H3K27ac_979		chr13	99226316	99229284	T5_H3K27ac_979
	chr1	28673129	28673496	RT4_K27ac_980		chr1	38712232	38712623	SW_K27ac_980		chr1	19776854	19777274	SC_K27ac_980		chr1	29597995	29598214	HT1376_K27ac_980		chr1	15528728	15529123	T1_H3K27ac_1_980		chr7	129588615	129592952	T3_H3K27ac_980		chr5	32443555	32444902	T4_H3K27ac_980		chr20	5590075	5592272	T5_H3K27ac_980
	chr1	28677715	28678282	RT4_K27ac_981		chr1	39324898	39325354	SW_K27ac_981		chr1	19777652	19778224	SC_K27ac_981		chr1	29606913	29607192	HT1376_K27ac_981		chr1	15529305	15529794	T1_H3K27ac_1_981		chr19	48824003	48826503	T3_H3K27ac_981		chr7	130790260	130796533	T4_H3K27ac_981		chr3	156805440	156809020	T5_H3K27ac_981
	chr1	28678565	28679378	RT4_K27ac_982		chr1	39338459	39339016	SW_K27ac_982		chr1	19795047	19795817	SC_K27ac_982		chr1	29646929	29647447	HT1376_K27ac_982		chr1	15532850	15533089	T1_H3K27ac_1_982		chr20	61553646	61561050	T3_H3K27ac_982		chr20	33871814	33873393	T4_H3K27ac_982		chr6	150037317	150039991	T5_H3K27ac_982
	chr1	28679672	28679978	RT4_K27ac_983		chr1	39406942	39407777	SW_K27ac_983		chr1	19796275	19796480	SC_K27ac_983		chr1	30043307	30043751	HT1376_K27ac_983		chr1	15533444	15534266	T1_H3K27ac_1_983		chr20	62151062	62153290	T3_H3K27ac_983		chr19	56914622	56915957	T4_H3K27ac_983		chr2	24148491	24151231	T5_H3K27ac_983
	chr1	28680203	28680621	RT4_K27ac_984		chr1	39424447	39424711	SW_K27ac_984		chr1	19810351	19812087	SC_K27ac_984		chr1	30984603	30984904	HT1376_K27ac_984		chr1	15534485	15534965	T1_H3K27ac_1_984		chr12	56613986	56616734	T3_H3K27ac_984		chr6	26233235	26235997	T4_H3K27ac_984		chr7	158619862	158623227	T5_H3K27ac_984
	chr1	28692237	28692524	RT4_K27ac_985		chr1	39456397	39456787	SW_K27ac_985		chr1	19812197	19813447	SC_K27ac_985		chr1	31089749	31089964	HT1376_K27ac_985		chr1	15540595	15541801	T1_H3K27ac_1_985		chr1	93296847	93299768	T3_H3K27ac_985		chr19	48247932	48249375	T4_H3K27ac_985		chr1	6660302	6665211	T5_H3K27ac_985
	chr1	28695604	28697126	RT4_K27ac_986		chr1	39456889	39457910	SW_K27ac_986		chr1	19922670	19924384	SC_K27ac_986		chr1	31090391	31092200	HT1376_K27ac_986		chr1	15543934	15544373	T1_H3K27ac_1_986		chr10	63802724	63819803	T3_H3K27ac_986		chr1	228327877	228330051	T4_H3K27ac_986		chr17	26661582	26664217	T5_H3K27ac_986
	chr1	28720945	28721908	RT4_K27ac_987		chr1	39491505	39492957	SW_K27ac_987		chr1	19941561	19941876	SC_K27ac_987		chr1	31122239	31122811	HT1376_K27ac_987		chr1	15544601	15544948	T1_H3K27ac_1_987		chr1	226185394	226189311	T3_H3K27ac_987		chr19	8509833	8511598	T4_H3K27ac_987		chr20	30697181	30698628	T5_H3K27ac_987
	chr1	28739178	28739541	RT4_K27ac_988		chr1	39563853	39564207	SW_K27ac_988		chr1	19942425	19944326	SC_K27ac_988		chr1	31142506	31144438	HT1376_K27ac_988		chr1	15545401	15546395	T1_H3K27ac_1_988		chr1	52343039	52345428	T3_H3K27ac_988		chr1	154942901	154949315	T4_H3K27ac_988		chr17	76774292	76778395	T5_H3K27ac_988
	chr1	28755666	28755954	RT4_K27ac_989		chr1	39570525	39572327	SW_K27ac_989		chr1	19944549	19944759	SC_K27ac_989		chr1	31158464	31159090	HT1376_K27ac_989		chr1	15547995	15548576	T1_H3K27ac_1_989		chr1	65530134	65535276	T3_H3K27ac_989		chr1	32479413	32480700	T4_H3K27ac_989		chr19	3136017	3137857	T5_H3K27ac_989
	chr1	28763719	28764989	RT4_K27ac_990		chr1	39583604	39583791	SW_K27ac_990		chr1	19966260	19966532	SC_K27ac_990		chr1	31173567	31174626	HT1376_K27ac_990		chr1	15550526	15550789	T1_H3K27ac_1_990		chr3	63896849	63900609	T3_H3K27ac_990		chr17	27052527	27056170	T4_H3K27ac_990		chr11	62475854	62478281	T5_H3K27ac_990
	chr1	28776083	28776754	RT4_K27ac_991		chr1	39624303	39624519	SW_K27ac_991		chr1	19969863	19970586	SC_K27ac_991		chr1	31190639	31191275	HT1376_K27ac_991		chr1	15551063	15551266	T1_H3K27ac_1_991		chr4	140475007	140479193	T3_H3K27ac_991		chr16	3312882	3315017	T4_H3K27ac_991		chr19	52772640	52774435	T5_H3K27ac_991
	chr1	28785444	28785636	RT4_K27ac_992		chr1	39649085	39649448	SW_K27ac_992		chr1	19971076	19972065	SC_K27ac_992		chr1	31191582	31192265	HT1376_K27ac_992		chr1	15555147	15555974	T1_H3K27ac_1_992		chr5	40833152	40837004	T3_H3K27ac_992		chr20	48428312	48430966	T4_H3K27ac_992		chr1	155242270	155244577	T5_H3K27ac_992
	chr1	28797546	28797865	RT4_K27ac_993		chr1	39651559	39651753	SW_K27ac_993		chr1	20091380	20091751	SC_K27ac_993		chr1	31209679	31212008	HT1376_K27ac_993		chr1	15557248	15557485	T1_H3K27ac_1_993		chr8	98655231	98658106	T3_H3K27ac_993		chr6	114175694	114182074	T4_H3K27ac_993		chr18	72263808	72266092	T5_H3K27ac_993
	chr1	28798148	28798610	RT4_K27ac_994		chr1	39657484	39657823	SW_K27ac_994		chr1	20091846	20092201	SC_K27ac_994		chr1	31220603	31221923	HT1376_K27ac_994		chr1	15558551	15558723	T1_H3K27ac_1_994		chrX	41190647	41196147	T3_H3K27ac_994		chr7	26903379	26904932	T4_H3K27ac_994		chr3	52078171	52082940	T5_H3K27ac_994
	chr1	28831983	28832266	RT4_K27ac_995		chr1	39658434	39658797	SW_K27ac_995		chr1	20092944	20093249	SC_K27ac_995		chr1	31229690	31230196	HT1376_K27ac_995		chr1	15572902	15573092	T1_H3K27ac_1_995		chr11	9405769	9407855	T3_H3K27ac_995		chr20	33679837	33681439	T4_H3K27ac_995		chr6	20402044	20405240	T5_H3K27ac_995
	chr1	28832585	28834658	RT4_K27ac_996		chr1	39678317	39678501	SW_K27ac_996		chr1	20125449	20127005	SC_K27ac_996		chr1	31255387	31255865	HT1376_K27ac_996		chr1	15573299	15573464	T1_H3K27ac_1_996		chr17	30676388	30678754	T3_H3K27ac_996		chr9	95527227	95528298	T4_H3K27ac_996		chr10	99893965	99895557	T5_H3K27ac_996
	chr1	28834828	28835276	RT4_K27ac_997		chr1	39679017	39679277	SW_K27ac_997		chr1	20198479	20198692	SC_K27ac_997		chr1	31270156	31271005	HT1376_K27ac_997		chr1	15573673	15574508	T1_H3K27ac_1_997		chr6	158588584	158590167	T3_H3K27ac_997		chr8	134306942	134310915	T4_H3K27ac_997		chr11	62367695	62370717	T5_H3K27ac_997
	chr1	28844652	28845705	RT4_K27ac_998		chr1	39679488	39680004	SW_K27ac_998		chr1	20208843	20210046	SC_K27ac_998		chr1	31296645	31297436	HT1376_K27ac_998		chr1	15575336	15575552	T1_H3K27ac_1_998		chr12	28342935	28344924	T3_H3K27ac_998		chr2	38603261	38604530	T4_H3K27ac_998		chr14	67707093	67709910	T5_H3K27ac_998
	chr1	28851768	28853978	RT4_K27ac_999		chr1	39680202	39681755	SW_K27ac_999		chr1	20211566	20212528	SC_K27ac_999		chr1	31382683	31383496	HT1376_K27ac_999		chr1	15585205	15585370	T1_H3K27ac_1_999		chr16	2801737	2804524	T3_H3K27ac_999		chr19	36119029	36120663	T4_H3K27ac_999		chr10	105726139	105729087	T5_H3K27ac_999
	chr1	28867626	28868896	RT4_K27ac_1000		chr1	39682203	39682677	SW_K27ac_1000		chr1	20219567	20220674	SC_K27ac_1000		chr1	31406221	31407012	HT1376_K27ac_1000		chr1	15587884	15588564	T1_H3K27ac_1_1000		chr1	156087748	156100920	T3_H3K27ac_1000		chr14	92505523	92507280	T4_H3K27ac_1000		chr12	45608445	45611857	T5_H3K27ac_1000
	chr1	28878911	28880224	RT4_K27ac_1001		chr1	39685435	39685717	SW_K27ac_1001		chr1	20220957	20221414	SC_K27ac_1001		chr1	31450119	31450348	HT1376_K27ac_1001		chr1	15588877	15589129	T1_H3K27ac_1_1001		chr17	45265408	45266763	T3_H3K27ac_1001		chr6	116599817	116601879	T4_H3K27ac_1001		chr6	42531601	42534403	T5_H3K27ac_1001
	chr1	28900876	28901526	RT4_K27ac_1002		chr1	39686210	39686644	SW_K27ac_1002		chr1	20221672	20221896	SC_K27ac_1002		chr1	31471270	31471535	HT1376_K27ac_1002		chr1	15649893	15650128	T1_H3K27ac_1_1002		chr2	157291632	157294270	T3_H3K27ac_1002		chr19	13056490	13057433	T4_H3K27ac_1002		chr11	3817830	3818880	T5_H3K27ac_1002
	chr1	28907271	28908373	RT4_K27ac_1003		chr1	39686889	39687666	SW_K27ac_1003		chr1	20229541	20230230	SC_K27ac_1003		chr1	31480302	31480886	HT1376_K27ac_1003		chr1	15663841	15664321	T1_H3K27ac_1_1003		chr7	157128761	157131765	T3_H3K27ac_1003		chr14	74484777	74486523	T4_H3K27ac_1003		chr20	35200810	35204509	T5_H3K27ac_1003
	chr1	28908602	28908906	RT4_K27ac_1004		chr1	39812345	39813019	SW_K27ac_1004		chr1	20230320	20231195	SC_K27ac_1004		chr1	31498159	31498742	HT1376_K27ac_1004		chr1	15664733	15665211	T1_H3K27ac_1_1004		chr8	59570185	59573894	T3_H3K27ac_1004		chr20	52208404	52212176	T4_H3K27ac_1004		chr12	123378732	123381461	T5_H3K27ac_1004
	chr1	28916563	28917071	RT4_K27ac_1005		chr1	39859954	39861951	SW_K27ac_1005		chr1	20231563	20231809	SC_K27ac_1005		chr1	31504419	31504845	HT1376_K27ac_1005		chr1	15666353	15666579	T1_H3K27ac_1_1005		chr17	38496062	38504696	T3_H3K27ac_1005		chr3	50373030	50377519	T4_H3K27ac_1005		chr19	47216802	47221787	T5_H3K27ac_1005
	chr1	28948419	28948844	RT4_K27ac_1006		chr1	39863681	39864340	SW_K27ac_1006		chr1	20478511	20478915	SC_K27ac_1006		chr1	31511924	31512589	HT1376_K27ac_1006		chr1	15667890	15669895	T1_H3K27ac_1_1006		chr19	19931558	19933298	T3_H3K27ac_1006		chr7	100180821	100184656	T4_H3K27ac_1006		chr19	56110009	56113178	T5_H3K27ac_1006
	chr1	28962558	28963281	RT4_K27ac_1007		chr1	39864597	39865419	SW_K27ac_1007		chr1	20479052	20479243	SC_K27ac_1007		chr1	31520434	31520899	HT1376_K27ac_1007		chr1	15672185	15673308	T1_H3K27ac_1_1007		chr10	85898226	85900501	T3_H3K27ac_1007		chr7	155436272	155438303	T4_H3K27ac_1007		chr9	113016539	113020595	T5_H3K27ac_1007
	chr1	28969004	28970515	RT4_K27ac_1008		chr1	39873666	39874351	SW_K27ac_1008		chr1	20480277	20480932	SC_K27ac_1008		chr1	31537672	31539296	HT1376_K27ac_1008		chr1	15673460	15673877	T1_H3K27ac_1_1008		chr22	38704699	38715440	T3_H3K27ac_1008		chr11	62366833	62370586	T4_H3K27ac_1008		chr13	113862239	113864821	T5_H3K27ac_1008
	chr1	28974567	28976122	RT4_K27ac_1009		chr1	39874716	39875578	SW_K27ac_1009		chr1	20480998	20481353	SC_K27ac_1009		chr1	31573332	31573765	HT1376_K27ac_1009		chr1	15674314	15674499	T1_H3K27ac_1_1009		chr6	53212567	53214965	T3_H3K27ac_1009		chr1	19535348	19538045	T4_H3K27ac_1009		chr6	139693368	139697745	T5_H3K27ac_1009
	chr1	28994709	28995351	RT4_K27ac_1010		chr1	40041021	40042358	SW_K27ac_1010		chr1	20497740	20498186	SC_K27ac_1010		chr1	31575464	31575939	HT1376_K27ac_1010		chr1	15678763	15679064	T1_H3K27ac_1_1010		chr20	57463317	57468219	T3_H3K27ac_1010		chr3	184052503	184054647	T4_H3K27ac_1010		chr8	135724003	135726311	T5_H3K27ac_1010
	chr1	28995569	28996305	RT4_K27ac_1011		chr1	40105452	40105704	SW_K27ac_1011		chr1	20512068	20513251	SC_K27ac_1011		chr1	31583882	31584732	HT1376_K27ac_1011		chr1	15679281	15679477	T1_H3K27ac_1_1011		chr21	43429036	43431483	T3_H3K27ac_1011		chr4	73933727	73936725	T4_H3K27ac_1011		chr10	31606852	31611045	T5_H3K27ac_1011
	chr1	29045411	29045883	RT4_K27ac_1012		chr1	40204527	40205299	SW_K27ac_1012		chr1	20536090	20539500	SC_K27ac_1012		chr1	31611315	31612096	HT1376_K27ac_1012		chr1	15727039	15727208	T1_H3K27ac_1_1012		chr22	21270379	21273504	T3_H3K27ac_1012		chr5	142781205	142785837	T4_H3K27ac_1012		chr15	52969211	52972642	T5_H3K27ac_1012
	chr1	29047823	29048611	RT4_K27ac_1013		chr1	40254573	40255156	SW_K27ac_1013		chr1	20539556	20540101	SC_K27ac_1013		chr1	31627274	31628676	HT1376_K27ac_1013		chr1	15727813	15728000	T1_H3K27ac_1_1013		chr2	85659899	85666765	T3_H3K27ac_1013		chr21	43097728	43102685	T4_H3K27ac_1013		chr18	48404415	48406947	T5_H3K27ac_1013
	chr1	29062974	29064424	RT4_K27ac_1014		chr1	40281827	40282383	SW_K27ac_1014		chr1	20558501	20559094	SC_K27ac_1014		chr1	31634697	31635642	HT1376_K27ac_1014		chr1	15733821	15734026	T1_H3K27ac_1_1014		chr16	66549187	66552746	T3_H3K27ac_1014		chr13	28022345	28025961	T4_H3K27ac_1014		chr2	74683823	74685262	T5_H3K27ac_1014
	chr1	29122268	29123556	RT4_K27ac_1015		chr1	40283074	40284095	SW_K27ac_1015		chr1	20559363	20559950	SC_K27ac_1015		chr1	31643140	31644673	HT1376_K27ac_1015		chr1	15735953	15739829	T1_H3K27ac_1_1015		chr10	123686158	123688684	T3_H3K27ac_1015		chr7	100270618	100274441	T4_H3K27ac_1015		chr3	69061380	69063664	T5_H3K27ac_1015
	chr1	29152061	29153048	RT4_K27ac_1016		chr1	40287632	40288146	SW_K27ac_1016		chr1	20606320	20606855	SC_K27ac_1016		chr1	31769058	31769658	HT1376_K27ac_1016		chr1	15740048	15740653	T1_H3K27ac_1_1016		chr11	68815935	68820746	T3_H3K27ac_1016		chr12	44199188	44201762	T4_H3K27ac_1016		chr6	21593732	21597706	T5_H3K27ac_1016
	chr1	29168604	29168872	RT4_K27ac_1017		chr1	40290823	40291474	SW_K27ac_1017		chr1	20682060	20682661	SC_K27ac_1017		chr1	31769825	31770488	HT1376_K27ac_1017		chr1	15741031	15741561	T1_H3K27ac_1_1017		chr4	924130	927277	T3_H3K27ac_1017		chr14	39735072	39737256	T4_H3K27ac_1017		chr8	90913206	90915994	T5_H3K27ac_1017
	chr1	29186977	29187249	RT4_K27ac_1018		chr1	40291736	40292182	SW_K27ac_1018		chr1	20753101	20754506	SC_K27ac_1018		chr1	31843917	31844199	HT1376_K27ac_1018		chr1	15741716	15745226	T1_H3K27ac_1_1018		chr11	64888315	64890765	T3_H3K27ac_1018		chr19	1026002	1029060	T4_H3K27ac_1018		chr15	90931462	90933793	T5_H3K27ac_1018
	chr1	29211063	29211480	RT4_K27ac_1019		chr1	40292361	40293490	SW_K27ac_1019		chr1	20770786	20771314	SC_K27ac_1019		chr1	31862260	31863718	HT1376_K27ac_1019		chr1	15745605	15745770	T1_H3K27ac_1_1019		chr11	9284876	9287627	T3_H3K27ac_1019		chr3	50125600	50127169	T4_H3K27ac_1019		chr2	85764437	85767920	T5_H3K27ac_1019
	chr1	29212023	29212373	RT4_K27ac_1020		chr1	40295059	40295644	SW_K27ac_1020		chr1	20802582	20802999	SC_K27ac_1020		chr1	31869350	31870809	HT1376_K27ac_1020		chr1	15745979	15746238	T1_H3K27ac_1_1020		chr1	2477754	2481695	T3_H3K27ac_1020		chr3	99978984	99980484	T4_H3K27ac_1020		chr6	143264337	143269745	T5_H3K27ac_1020
	chr1	29212680	29214292	RT4_K27ac_1021		chr1	40296093	40296590	SW_K27ac_1021		chr1	20810471	20811936	SC_K27ac_1021		chr1	31886085	31887797	HT1376_K27ac_1021		chr1	15747257	15747425	T1_H3K27ac_1_1021		chr12	93320490	93324244	T3_H3K27ac_1021		chr4	103421483	103424001	T4_H3K27ac_1021		chr1	161358217	161360730	T5_H3K27ac_1021
	chr1	29224200	29224568	RT4_K27ac_1022		chr1	40312390	40312655	SW_K27ac_1022		chr1	20812248	20813695	SC_K27ac_1022		chr1	31888754	31889279	HT1376_K27ac_1022		chr1	15748854	15749336	T1_H3K27ac_1_1022		chr14	50326166	50332332	T3_H3K27ac_1022		chr11	67271584	67276621	T4_H3K27ac_1022		chr21	36253723	36265001	T5_H3K27ac_1022
	chr1	29240220	29241949	RT4_K27ac_1023		chr1	40312965	40313655	SW_K27ac_1023		chr1	20820514	20822767	SC_K27ac_1023		chr1	31889580	31889859	HT1376_K27ac_1023		chr1	15750254	15751647	T1_H3K27ac_1_1023		chr18	12882489	12885592	T3_H3K27ac_1023		chr1	222884889	222887284	T4_H3K27ac_1023		chr1	156425883	156428115	T5_H3K27ac_1023
	chr1	29247873	29248162	RT4_K27ac_1024		chr1	40315352	40316305	SW_K27ac_1024		chr1	20822979	20823805	SC_K27ac_1024		chr1	31894531	31895636	HT1376_K27ac_1024		chr1	15752696	15753233	T1_H3K27ac_1_1024		chr22	26878904	26880583	T3_H3K27ac_1024		chr19	4399223	4400478	T4_H3K27ac_1024		chr5	131828748	131835065	T5_H3K27ac_1024
	chr1	29254262	29255441	RT4_K27ac_1025		chr1	40316566	40316882	SW_K27ac_1025		chr1	20833832	20835154	SC_K27ac_1025		chr1	31907427	31909023	HT1376_K27ac_1025		chr1	15753680	15754526	T1_H3K27ac_1_1025		chr3	160938444	160940454	T3_H3K27ac_1025		chr1	197742621	197746593	T4_H3K27ac_1025		chr6	76310718	76313719	T5_H3K27ac_1025
	chr1	29291255	29291436	RT4_K27ac_1026		chr1	40317266	40317617	SW_K27ac_1026		chr1	20901910	20902952	SC_K27ac_1026		chr1	31933814	31934123	HT1376_K27ac_1026		chr1	15840675	15840840	T1_H3K27ac_1_1026		chr4	79696042	79698672	T3_H3K27ac_1026		chr17	49198396	49200258	T4_H3K27ac_1026		chr20	48428163	48431720	T5_H3K27ac_1026
	chr1	29299107	29299464	RT4_K27ac_1027		chr1	40318228	40318862	SW_K27ac_1027		chr1	20903173	20903496	SC_K27ac_1027		chr1	31943796	31945698	HT1376_K27ac_1027		chr1	15842257	15842468	T1_H3K27ac_1_1027		chr6	143246955	143249711	T3_H3K27ac_1027		chr14	102413632	102415748	T4_H3K27ac_1027		chr2	201674507	201678493	T5_H3K27ac_1027
	chr1	29299919	29301223	RT4_K27ac_1028		chr1	40319207	40319493	SW_K27ac_1028		chr1	20914933	20916126	SC_K27ac_1028		chr1	31949630	31951126	HT1376_K27ac_1028		chr1	15850319	15850824	T1_H3K27ac_1_1028		chr6	70504865	70507898	T3_H3K27ac_1028		chr14	35008288	35009549	T4_H3K27ac_1028		chr3	30646232	30650487	T5_H3K27ac_1028
	chr1	29376832	29377184	RT4_K27ac_1029		chr1	40347997	40349168	SW_K27ac_1029		chr1	20916179	20916491	SC_K27ac_1029		chr1	31959391	31960760	HT1376_K27ac_1029		chr1	15851081	15851381	T1_H3K27ac_1_1029		chr6	149637456	149644342	T3_H3K27ac_1029		chr5	180228461	180234389	T4_H3K27ac_1029		chr3	9833320	9835702	T5_H3K27ac_1029
	chr1	29381742	29381978	RT4_K27ac_1030		chr1	40349360	40349641	SW_K27ac_1030		chr1	20926272	20926684	SC_K27ac_1030		chr1	31976351	31978565	HT1376_K27ac_1030		chr1	15851684	15853086	T1_H3K27ac_1_1030		chr17	17594303	17603526	T3_H3K27ac_1030		chr6	2839905	2842682	T4_H3K27ac_1030		chr9	88554852	88557298	T5_H3K27ac_1030
	chr1	29420641	29421469	RT4_K27ac_1031		chr1	40366596	40367588	SW_K27ac_1031		chr1	20927435	20927791	SC_K27ac_1031		chr1	31988954	31989819	HT1376_K27ac_1031		chr1	15853250	15853914	T1_H3K27ac_1_1031		chr16	30708928	30711391	T3_H3K27ac_1031		chr10	11205332	11212884	T4_H3K27ac_1031		chr2	152116660	152118857	T5_H3K27ac_1031
	chr1	29432308	29432926	RT4_K27ac_1032		chr1	40367731	40368042	SW_K27ac_1032		chr1	20928275	20928947	SC_K27ac_1032		chr1	31996105	31997820	HT1376_K27ac_1032		chr1	15885458	15885780	T1_H3K27ac_1_1032		chr10	93682238	93684466	T3_H3K27ac_1032		chr1	155177706	155179471	T4_H3K27ac_1032		chr19	15441490	15443972	T5_H3K27ac_1032
	chr1	29450792	29451633	RT4_K27ac_1033		chr1	40420866	40421567	SW_K27ac_1033		chr1	20929001	20931663	SC_K27ac_1033		chr1	32013781	32015379	HT1376_K27ac_1033		chr1	15886264	15886910	T1_H3K27ac_1_1033		chr19	36629722	36633141	T3_H3K27ac_1033		chr2	153573209	153575693	T4_H3K27ac_1033		chr2	55277801	55278871	T5_H3K27ac_1033
	chr1	29472541	29473082	RT4_K27ac_1034		chr1	40435641	40436481	SW_K27ac_1034		chr1	20938055	20938565	SC_K27ac_1034		chr1	32027793	32029683	HT1376_K27ac_1034		chr1	15905376	15906592	T1_H3K27ac_1_1034		chr10	65280337	65283781	T3_H3K27ac_1034		chr20	35806454	35808191	T4_H3K27ac_1034		chr5	158632521	158637426	T5_H3K27ac_1034
	chr1	29492034	29492778	RT4_K27ac_1035		chr1	40446187	40448370	SW_K27ac_1035		chr1	20938644	20941311	SC_K27ac_1035		chr1	32039778	32040611	HT1376_K27ac_1035		chr1	15911510	15911733	T1_H3K27ac_1_1035		chr16	87424113	87427070	T3_H3K27ac_1035		chr3	160281746	160284519	T4_H3K27ac_1035		chr6	31761967	31764560	T5_H3K27ac_1035
	chr1	29507355	29508467	RT4_K27ac_1036		chr1	40453708	40453926	SW_K27ac_1036		chr1	20959491	20959818	SC_K27ac_1036		chr1	32040787	32041968	HT1376_K27ac_1036		chr1	15929449	15930004	T1_H3K27ac_1_1036		chr17	63050264	63055467	T3_H3K27ac_1036		chr7	44787606	44789362	T4_H3K27ac_1036		chr9	21557729	21561393	T5_H3K27ac_1036
	chr1	29517827	29518207	RT4_K27ac_1037		chr1	40454043	40454343	SW_K27ac_1037		chr1	20960191	20961199	SC_K27ac_1037		chr1	32042228	32042924	HT1376_K27ac_1037		chr1	15930231	15930724	T1_H3K27ac_1_1037		chr1	45804858	45807079	T3_H3K27ac_1037		chr19	16737544	16740300	T4_H3K27ac_1037		chr1	27112064	27115770	T5_H3K27ac_1037
	chr1	29528476	29529399	RT4_K27ac_1038		chr1	40455191	40456220	SW_K27ac_1038		chr1	20986891	20987943	SC_K27ac_1038		chr1	32046900	32047426	HT1376_K27ac_1038		chr1	15937129	15937411	T1_H3K27ac_1_1038		chr14	102275006	102282990	T3_H3K27ac_1038		chr19	54641384	54642155	T4_H3K27ac_1038		chr5	132297519	132300073	T5_H3K27ac_1038
	chr1	29534123	29534361	RT4_K27ac_1039		chr1	40456651	40457066	SW_K27ac_1039		chr1	20988073	20988820	SC_K27ac_1039		chr1	32047773	32048509	HT1376_K27ac_1039		chr1	15942717	15946817	T1_H3K27ac_1_1039		chr1	149980777	149983507	T3_H3K27ac_1039		chr7	2393255	2395250	T4_H3K27ac_1039		chr3	136468941	136473048	T5_H3K27ac_1039
	chr1	29553597	29554637	RT4_K27ac_1040		chr1	40480252	40480872	SW_K27ac_1040		chr1	21023035	21024058	SC_K27ac_1040		chr1	32053607	32054910	HT1376_K27ac_1040		chr1	15947380	15947800	T1_H3K27ac_1_1040		chr4	1338873	1342272	T3_H3K27ac_1040		chr17	73974378	73976743	T4_H3K27ac_1040		chr11	1968522	1969403	T5_H3K27ac_1040
	chr1	29556967	29557729	RT4_K27ac_1041		chr1	40494855	40495141	SW_K27ac_1041		chr1	21025216	21025386	SC_K27ac_1041		chr1	32094117	32094577	HT1376_K27ac_1041		chr1	15948075	15948248	T1_H3K27ac_1_1041		chr6	36512013	36516206	T3_H3K27ac_1041		chr6	170861638	170864012	T4_H3K27ac_1041		chr17	7140749	7147106	T5_H3K27ac_1041
	chr1	29563063	29565826	RT4_K27ac_1042		chr1	40504905	40506221	SW_K27ac_1042		chr1	21044387	21045106	SC_K27ac_1042		chr1	32109648	32111332	HT1376_K27ac_1042		chr1	16006560	16006753	T1_H3K27ac_1_1042		chr8	125485181	125489022	T3_H3K27ac_1042		chr1	112049707	112051820	T4_H3K27ac_1042		chr1	89735310	89745508	T5_H3K27ac_1042
	chr1	29575717	29576937	RT4_K27ac_1043		chr1	40506400	40507441	SW_K27ac_1043		chr1	21051795	21052028	SC_K27ac_1043		chr1	32116892	32117825	HT1376_K27ac_1043		chr1	16007023	16007352	T1_H3K27ac_1_1043		chr15	78729574	78731519	T3_H3K27ac_1043		chr11	62476406	62478177	T4_H3K27ac_1043		chr2	64368568	64371593	T5_H3K27ac_1043
	chr1	29625861	29626239	RT4_K27ac_1044		chr1	40525576	40526041	SW_K27ac_1044		chr1	21052108	21052428	SC_K27ac_1044		chr1	32166408	32166676	HT1376_K27ac_1044		chr1	16008284	16008704	T1_H3K27ac_1_1044		chr18	47017403	47019181	T3_H3K27ac_1044		chr3	122232705	122233845	T4_H3K27ac_1044		chr17	16118081	16121058	T5_H3K27ac_1044
	chr1	29646579	29647240	RT4_K27ac_1045		chr1	40573031	40573364	SW_K27ac_1045		chr1	21057315	21058558	SC_K27ac_1045		chr1	32220701	32221120	HT1376_K27ac_1045		chr1	16009295	16009589	T1_H3K27ac_1_1045		chr2	150443185	150444653	T3_H3K27ac_1045		chr11	65380054	65384396	T4_H3K27ac_1045		chr6	31587183	31590135	T5_H3K27ac_1045
	chr1	29680905	29681482	RT4_K27ac_1046		chr1	40573649	40573868	SW_K27ac_1046		chr1	21058699	21059708	SC_K27ac_1046		chr1	32234020	32234408	HT1376_K27ac_1046		chr1	16009761	16011860	T1_H3K27ac_1_1046		chr4	140221207	140224135	T3_H3K27ac_1046		chr2	201675591	201677613	T4_H3K27ac_1046		chr10	70659746	70662136	T5_H3K27ac_1046
	chr1	29736899	29737672	RT4_K27ac_1047		chr1	40605667	40606077	SW_K27ac_1047		chr1	21059809	21061229	SC_K27ac_1047		chr1	32253450	32254905	HT1376_K27ac_1047		chr1	16012607	16012961	T1_H3K27ac_1_1047		chr5	141487593	141490165	T3_H3K27ac_1047		chr22	18120528	18122918	T4_H3K27ac_1047		chr10	123686234	123688601	T5_H3K27ac_1047
	chr1	29752990	29753682	RT4_K27ac_1048		chr1	40606579	40607138	SW_K27ac_1048		chr1	21061625	21062316	SC_K27ac_1048		chr1	32351963	32352252	HT1376_K27ac_1048		chr1	16023403	16024451	T1_H3K27ac_1_1048		chr6	31322322	31326037	T3_H3K27ac_1048		chr12	112855875	112857626	T4_H3K27ac_1048		chr17	5389722	5390839	T5_H3K27ac_1048
	chr1	29876003	29877600	RT4_K27ac_1049		chr1	40626588	40627969	SW_K27ac_1049		chr1	21062373	21064204	SC_K27ac_1049		chr1	32402998	32404647	HT1376_K27ac_1049		chr1	16028167	16028337	T1_H3K27ac_1_1049		chr9	97762184	97771429	T3_H3K27ac_1049		chr14	24663743	24666167	T4_H3K27ac_1049		chr19	48110800	48114173	T5_H3K27ac_1049
	chr1	30042598	30044217	RT4_K27ac_1050		chr1	40707170	40707462	SW_K27ac_1050		chr1	21064586	21065097	SC_K27ac_1050		chr1	32409807	32410926	HT1376_K27ac_1050		chr1	16028498	16028961	T1_H3K27ac_1_1050		chr10	112677701	112680884	T3_H3K27ac_1050		chr2	18740482	18742361	T4_H3K27ac_1050		chr20	33678668	33681908	T5_H3K27ac_1050
	chr1	30047945	30048706	RT4_K27ac_1051		chr1	40722964	40723625	SW_K27ac_1051		chr1	21065323	21067312	SC_K27ac_1051		chr1	32420053	32421503	HT1376_K27ac_1051		chr1	16029250	16030751	T1_H3K27ac_1_1051		chr11	18342599	18345270	T3_H3K27ac_1051		chr9	27571791	27574290	T4_H3K27ac_1051		chr21	34913472	34917504	T5_H3K27ac_1051
	chr1	30049234	30049832	RT4_K27ac_1052		chr1	40723964	40724481	SW_K27ac_1052		chr1	21108620	21109175	SC_K27ac_1052		chr1	32421779	32422616	HT1376_K27ac_1052		chr1	16067298	16067664	T1_H3K27ac_1_1052		chr1	152005806	152011437	T3_H3K27ac_1052		chr17	39821234	39824250	T4_H3K27ac_1052		chr2	170440618	170442376	T5_H3K27ac_1052
	chr1	30055908	30057421	RT4_K27ac_1053		chr1	40770208	40770634	SW_K27ac_1053		chr1	21112263	21113812	SC_K27ac_1053		chr1	32478790	32480470	HT1376_K27ac_1053		chr1	16082913	16087491	T1_H3K27ac_1_1053		chr1	19534062	19537991	T3_H3K27ac_1053		chr19	48673196	48674509	T4_H3K27ac_1053		chr2	191744244	191749804	T5_H3K27ac_1053
	chr1	30065875	30066243	RT4_K27ac_1054		chr1	40771246	40771856	SW_K27ac_1054		chr1	21113875	21114757	SC_K27ac_1054		chr1	32500854	32501153	HT1376_K27ac_1054		chr1	16087800	16088088	T1_H3K27ac_1_1054		chr13	29231739	29234809	T3_H3K27ac_1054		chr7	27152717	27154356	T4_H3K27ac_1054		chr4	114680687	114684738	T5_H3K27ac_1054
	chr1	30113103	30113564	RT4_K27ac_1055		chr1	40778256	40778530	SW_K27ac_1055		chr1	21207957	21208256	SC_K27ac_1055		chr1	32527819	32529083	HT1376_K27ac_1055		chr1	16088298	16088533	T1_H3K27ac_1_1055		chr15	60681168	60692247	T3_H3K27ac_1055		chr17	73257083	73258614	T4_H3K27ac_1055		chr5	149864864	149870325	T5_H3K27ac_1055
	chr1	30180987	30183755	RT4_K27ac_1056		chr1	40839445	40840158	SW_K27ac_1056		chr1	21208445	21208990	SC_K27ac_1056		chr1	32538188	32539417	HT1376_K27ac_1056		chr1	16106750	16107082	T1_H3K27ac_1_1056		chr1	93644508	93646096	T3_H3K27ac_1056		chr9	95086762	95088662	T4_H3K27ac_1056		chr5	72250443	72253406	T5_H3K27ac_1056
	chr1	30204924	30205143	RT4_K27ac_1057		chr1	40840347	40840668	SW_K27ac_1057		chr1	21209056	21210843	SC_K27ac_1057		chr1	32573481	32575042	HT1376_K27ac_1057		chr1	16107382	16107789	T1_H3K27ac_1_1057		chr19	912195	914185	T3_H3K27ac_1057		chr21	40176660	40180524	T4_H3K27ac_1057		chr6	15244538	15250332	T5_H3K27ac_1057
	chr1	30266277	30266569	RT4_K27ac_1058		chr1	40974022	40974781	SW_K27ac_1058		chr1	21210949	21212076	SC_K27ac_1058		chr1	32581170	32581666	HT1376_K27ac_1058		chr1	16114914	16115222	T1_H3K27ac_1_1058		chr20	30697128	30699053	T3_H3K27ac_1058		chr1	202926495	202928056	T4_H3K27ac_1058		chr8	145057833	145061910	T5_H3K27ac_1058
	chr1	30273118	30273421	RT4_K27ac_1059		chr1	40996759	40997035	SW_K27ac_1059		chr1	21212670	21213030	SC_K27ac_1059		chr1	32581893	32582543	HT1376_K27ac_1059		chr1	16119834	16120032	T1_H3K27ac_1_1059		chr3	5228497	5231686	T3_H3K27ac_1059		chr17	36980544	36982531	T4_H3K27ac_1059		chr9	35095707	35097202	T5_H3K27ac_1059
	chr1	30273928	30274194	RT4_K27ac_1060		chr1	41157278	41158135	SW_K27ac_1060		chr1	21342905	21343236	SC_K27ac_1060		chr1	32586294	32587009	HT1376_K27ac_1060		chr1	16120259	16120591	T1_H3K27ac_1_1060		chr11	64900208	64903272	T3_H3K27ac_1060		chr20	43150016	43151334	T4_H3K27ac_1060		chr5	43120162	43122868	T5_H3K27ac_1060
	chr1	30324291	30325458	RT4_K27ac_1061		chr1	41174667	41175734	SW_K27ac_1061		chr1	21347500	21347794	SC_K27ac_1061		chr1	32597789	32599062	HT1376_K27ac_1061		chr1	16122077	16123460	T1_H3K27ac_1_1061		chr2	64993683	64996350	T3_H3K27ac_1061		chr13	96328395	96330241	T4_H3K27ac_1061		chr12	25402786	25405046	T5_H3K27ac_1061
	chr1	30348415	30348755	RT4_K27ac_1062		chr1	41176228	41176795	SW_K27ac_1062		chr1	21348183	21348624	SC_K27ac_1062		chr1	32599289	32599745	HT1376_K27ac_1062		chr1	16123930	16124117	T1_H3K27ac_1_1062		chr11	67006680	67009576	T3_H3K27ac_1062		chr13	32888875	32890482	T4_H3K27ac_1062		chr19	36978922	36982061	T5_H3K27ac_1062
	chr1	30369953	30370456	RT4_K27ac_1063		chr1	41177319	41177737	SW_K27ac_1063		chr1	21348951	21349949	SC_K27ac_1063		chr1	32604263	32605061	HT1376_K27ac_1063		chr1	16124451	16124768	T1_H3K27ac_1_1063		chr10	112628958	112634253	T3_H3K27ac_1063		chr1	145453056	145457359	T4_H3K27ac_1063		chr14	31493765	31496971	T5_H3K27ac_1063
	chr1	30400400	30400603	RT4_K27ac_1064		chr1	41178774	41179081	SW_K27ac_1064		chr1	21350672	21350901	SC_K27ac_1064		chr1	32607918	32608303	HT1376_K27ac_1064		chr1	16125003	16125603	T1_H3K27ac_1_1064		chr8	135842517	135845498	T3_H3K27ac_1064		chr22	46431925	46433111	T4_H3K27ac_1064		chr1	85740618	85743748	T5_H3K27ac_1064
	chr1	30405453	30405901	RT4_K27ac_1065		chr1	41327558	41327969	SW_K27ac_1065		chr1	21408843	21409240	SC_K27ac_1065		chr1	32608631	32609122	HT1376_K27ac_1065		chr1	16125763	16127452	T1_H3K27ac_1_1065		chr11	72523667	72527330	T3_H3K27ac_1065		chr4	36244274	36246923	T4_H3K27ac_1065		chr1	8932511	8940816	T5_H3K27ac_1065
	chr1	30447314	30448038	RT4_K27ac_1066		chr1	41328386	41328823	SW_K27ac_1066		chr1	21409573	21411308	SC_K27ac_1066		chr1	32644882	32646412	HT1376_K27ac_1066		chr1	16127634	16128116	T1_H3K27ac_1_1066		chr3	47821615	47824761	T3_H3K27ac_1066		chr21	34601676	34604778	T4_H3K27ac_1066		chr6	109414934	109417280	T5_H3K27ac_1066
	chr1	30456827	30458773	RT4_K27ac_1067		chr1	41329135	41330752	SW_K27ac_1067		chr1	21416971	21417304	SC_K27ac_1067		chr1	32651778	32652453	HT1376_K27ac_1067		chr1	16157131	16157592	T1_H3K27ac_1_1067		chr5	140996536	140998660	T3_H3K27ac_1067		chr17	28804355	28805005	T4_H3K27ac_1067		chr6	30683931	30690729	T5_H3K27ac_1067
	chr1	30478586	30479377	RT4_K27ac_1068		chr1	41331210	41332262	SW_K27ac_1068		chr1	21450788	21451024	SC_K27ac_1068		chr1	32670655	32672047	HT1376_K27ac_1068		chr1	16158079	16158276	T1_H3K27ac_1_1068		chr3	37284003	37286032	T3_H3K27ac_1068		chr7	112089740	112091739	T4_H3K27ac_1068		chr8	61428841	61431101	T5_H3K27ac_1068
	chr1	30541249	30542124	RT4_K27ac_1069		chr1	41332430	41333307	SW_K27ac_1069		chr1	21452420	21452619	SC_K27ac_1069		chr1	32687174	32688739	HT1376_K27ac_1069		chr1	16158766	16160192	T1_H3K27ac_1_1069		chr12	110938295	110940515	T3_H3K27ac_1069		chr7	77324939	77327438	T4_H3K27ac_1069		chr9	93954684	93957119	T5_H3K27ac_1069
	chr1	30556273	30557350	RT4_K27ac_1070		chr1	41333708	41334077	SW_K27ac_1070		chr1	21475937	21476790	SC_K27ac_1070		chr1	32701315	32702543	HT1376_K27ac_1070		chr1	16160887	16162391	T1_H3K27ac_1_1070		chr3	101394215	101397578	T3_H3K27ac_1070		chr14	31494404	31497057	T4_H3K27ac_1070		chr12	8973573	8976809	T5_H3K27ac_1070
	chr1	30598152	30598511	RT4_K27ac_1071		chr1	41334372	41334971	SW_K27ac_1071		chr1	21478297	21479051	SC_K27ac_1071		chr1	32706012	32707364	HT1376_K27ac_1071		chr1	16162572	16163351	T1_H3K27ac_1_1071		chr3	88106804	88110016	T3_H3K27ac_1071		chr21	44843268	44846851	T4_H3K27ac_1071		chr10	38299049	38301271	T5_H3K27ac_1071
	chr1	30649673	30649901	RT4_K27ac_1072		chr1	41338971	41339208	SW_K27ac_1072		chr1	21479254	21479440	SC_K27ac_1072		chr1	32756935	32758524	HT1376_K27ac_1072		chr1	16163745	16164192	T1_H3K27ac_1_1072		chr17	48796297	48798099	T3_H3K27ac_1072		chr9	139979907	139982112	T4_H3K27ac_1072		chr1	156467786	156475990	T5_H3K27ac_1072
	chr1	30890883	30891820	RT4_K27ac_1073		chr1	41340855	41341472	SW_K27ac_1073		chr1	21479919	21480579	SC_K27ac_1073		chr1	32798051	32798830	HT1376_K27ac_1073		chr1	16170395	16170581	T1_H3K27ac_1_1073		chr15	63792372	63798709	T3_H3K27ac_1073		chr1	155106431	155109852	T4_H3K27ac_1073		chr13	107218492	107221261	T5_H3K27ac_1073
	chr1	30893314	30893692	RT4_K27ac_1074		chr1	41341872	41342488	SW_K27ac_1074		chr1	21500771	21503023	SC_K27ac_1074		chr1	32816614	32817925	HT1376_K27ac_1074		chr1	16172939	16173317	T1_H3K27ac_1_1074		chr16	30074746	30080393	T3_H3K27ac_1074		chr21	42797025	42799152	T4_H3K27ac_1074		chr17	78119501	78122198	T5_H3K27ac_1074
	chr1	30933770	30933984	RT4_K27ac_1075		chr1	41342638	41343773	SW_K27ac_1075		chr1	21503078	21504019	SC_K27ac_1075		chr1	32859461	32860792	HT1376_K27ac_1075		chr1	16173570	16174044	T1_H3K27ac_1_1075		chr18	61636740	61639025	T3_H3K27ac_1075		chr15	66083138	66086441	T4_H3K27ac_1075		chr19	1847680	1848923	T5_H3K27ac_1075
	chr1	30999140	30999611	RT4_K27ac_1076		chr1	41343925	41344577	SW_K27ac_1076		chr1	21564197	21564953	SC_K27ac_1076		chr1	32965712	32966741	HT1376_K27ac_1076		chr1	16174215	16176279	T1_H3K27ac_1_1076		chr2	241499573	241501964	T3_H3K27ac_1076		chr12	113622316	113623948	T4_H3K27ac_1076		chr6	2839219	2843616	T5_H3K27ac_1076
	chr1	31121952	31124264	RT4_K27ac_1077		chr1	41351760	41352427	SW_K27ac_1077		chr1	21565138	21565482	SC_K27ac_1077		chr1	32986361	32986935	HT1376_K27ac_1077		chr1	16176511	16176778	T1_H3K27ac_1_1077		chr10	22725248	22727323	T3_H3K27ac_1077		chr16	67217474	67218726	T4_H3K27ac_1077		chr3	141084694	141089163	T5_H3K27ac_1077
	chr1	31130642	31131345	RT4_K27ac_1078		chr1	41352536	41353228	SW_K27ac_1078		chr1	21578074	21578785	SC_K27ac_1078		chr1	33004925	33005197	HT1376_K27ac_1078		chr1	16206624	16206789	T1_H3K27ac_1_1078		chr10	28820476	28823651	T3_H3K27ac_1078		chr17	1618251	1619576	T4_H3K27ac_1078		chr12	69863598	69864993	T5_H3K27ac_1078
	chr1	31140919	31141330	RT4_K27ac_1079		chr1	41362190	41363507	SW_K27ac_1079		chr1	21578941	21579412	SC_K27ac_1079		chr1	33005423	33005761	HT1376_K27ac_1079		chr1	16210553	16210721	T1_H3K27ac_1_1079		chr19	2053656	2062665	T3_H3K27ac_1079		chr16	87424658	87427055	T4_H3K27ac_1079		chr6	31164920	31167283	T5_H3K27ac_1079
	chr1	31150491	31150986	RT4_K27ac_1080		chr1	41363794	41365326	SW_K27ac_1080		chr1	21587467	21589765	SC_K27ac_1080		chr1	33077468	33078521	HT1376_K27ac_1080		chr1	16211089	16211427	T1_H3K27ac_1_1080		chr6	163833635	163837943	T3_H3K27ac_1080		chr8	68254836	68256407	T4_H3K27ac_1080		chr17	49196624	49200451	T5_H3K27ac_1080
	chr1	31190592	31191209	RT4_K27ac_1081		chr1	41365492	41366425	SW_K27ac_1081		chr1	21616889	21617795	SC_K27ac_1081		chr1	33115797	33117504	HT1376_K27ac_1081		chr1	16212509	16213735	T1_H3K27ac_1_1081		chr15	83478277	83480413	T3_H3K27ac_1081		chr10	134259934	134262138	T4_H3K27ac_1081		chr5	41924595	41926603	T5_H3K27ac_1081
	chr1	31191568	31192235	RT4_K27ac_1082		chr1	41366678	41367816	SW_K27ac_1082		chr1	21629054	21629329	SC_K27ac_1082		chr1	33181121	33182357	HT1376_K27ac_1082		chr1	16214069	16214319	T1_H3K27ac_1_1082		chr17	7737216	7741582	T3_H3K27ac_1082		chr11	65336321	65345402	T4_H3K27ac_1082		chr1	154941883	154949415	T5_H3K27ac_1082
	chr1	31216287	31216612	RT4_K27ac_1083		chr1	41367962	41369422	SW_K27ac_1083		chr1	21648844	21649294	SC_K27ac_1083		chr1	33182546	33183081	HT1376_K27ac_1083		chr1	16229835	16230013	T1_H3K27ac_1_1083		chr8	67024669	67027513	T3_H3K27ac_1083		chr12	123009368	123011609	T4_H3K27ac_1083		chr2	238600827	238607324	T5_H3K27ac_1083
	chr1	31221100	31221864	RT4_K27ac_1084		chr1	41372910	41373233	SW_K27ac_1084		chr1	21649537	21649864	SC_K27ac_1084		chr1	33190403	33191535	HT1376_K27ac_1084		chr1	16233282	16233447	T1_H3K27ac_1_1084		chr1	53685056	53687104	T3_H3K27ac_1084		chr1	68150232	68153154	T4_H3K27ac_1084		chr5	43016752	43021001	T5_H3K27ac_1084
	chr1	31229258	31230326	RT4_K27ac_1085		chr1	41414204	41414610	SW_K27ac_1085		chr1	21650349	21653358	SC_K27ac_1085		chr1	33206928	33207362	HT1376_K27ac_1085		chr1	16233890	16234067	T1_H3K27ac_1_1085		chr16	15068138	15070104	T3_H3K27ac_1085		chr21	30670137	30673590	T4_H3K27ac_1085		chr15	45458038	45460197	T5_H3K27ac_1085
	chr1	31247015	31247856	RT4_K27ac_1086		chr1	41432973	41433561	SW_K27ac_1086		chr1	21655427	21655848	SC_K27ac_1086		chr1	33207543	33209197	HT1376_K27ac_1086		chr1	16238141	16238387	T1_H3K27ac_1_1086		chr17	73867881	73875634	T3_H3K27ac_1086		chr22	30818352	30821042	T4_H3K27ac_1086		chr17	37909529	37913014	T5_H3K27ac_1086
	chr1	31276018	31276435	RT4_K27ac_1087		chr1	41433810	41434187	SW_K27ac_1087		chr1	21656138	21656658	SC_K27ac_1087		chr1	33219584	33221212	HT1376_K27ac_1087		chr1	16243402	16243628	T1_H3K27ac_1_1087		chr2	27543590	27546926	T3_H3K27ac_1087		chr22	32870255	32872225	T4_H3K27ac_1087		chr3	38178840	38181366	T5_H3K27ac_1087
	chr1	31296571	31297546	RT4_K27ac_1088		chr1	41444945	41446550	SW_K27ac_1088		chr1	21656819	21657103	SC_K27ac_1088		chr1	33225164	33225760	HT1376_K27ac_1088		chr1	16250265	16250491	T1_H3K27ac_1_1088		chr6	99872055	99874851	T3_H3K27ac_1088		chr2	43036733	43038734	T4_H3K27ac_1088		chr8	56684084	56687031	T5_H3K27ac_1088
	chr1	31324874	31325367	RT4_K27ac_1089		chr1	41574199	41574865	SW_K27ac_1089		chr1	21660487	21662428	SC_K27ac_1089		chr1	33225976	33227870	HT1376_K27ac_1089		chr1	16265418	16265838	T1_H3K27ac_1_1089		chrX	12988244	12998826	T3_H3K27ac_1089		chr8	17940002	17942480	T4_H3K27ac_1089		chr17	8338266	8340630	T5_H3K27ac_1089
	chr1	31351911	31352683	RT4_K27ac_1090		chr1	41575189	41575759	SW_K27ac_1090		chr1	21662635	21662881	SC_K27ac_1090		chr1	33235378	33235752	HT1376_K27ac_1090		chr1	16274928	16275132	T1_H3K27ac_1_1090		chr2	85553102	85556189	T3_H3K27ac_1090		chr9	4983587	4986596	T4_H3K27ac_1090		chr12	93770279	93774904	T5_H3K27ac_1090
	chr1	31382664	31383136	RT4_K27ac_1091		chr1	41706959	41707856	SW_K27ac_1091		chr1	21671131	21671648	SC_K27ac_1091		chr1	33246069	33247062	HT1376_K27ac_1091		chr1	16275391	16277477	T1_H3K27ac_1_1091		chr15	25682700	25684966	T3_H3K27ac_1091		chr22	31684765	31688452	T4_H3K27ac_1091		chr11	102186325	102191903	T5_H3K27ac_1091
	chr1	31407133	31408061	RT4_K27ac_1092		chr1	41708001	41708477	SW_K27ac_1092		chr1	21672140	21672760	SC_K27ac_1092		chr1	33254217	33254999	HT1376_K27ac_1092		chr1	16278827	16279315	T1_H3K27ac_1_1092		chr1	155242163	155243961	T3_H3K27ac_1092		chr14	94546144	94548346	T4_H3K27ac_1092		chr11	67051130	67058438	T5_H3K27ac_1092
	chr1	31417861	31418087	RT4_K27ac_1093		chr1	41807563	41808250	SW_K27ac_1093		chr1	21687759	21688280	SC_K27ac_1093		chr1	33255253	33255712	HT1376_K27ac_1093		chr1	16279832	16280360	T1_H3K27ac_1_1093		chr20	35806164	35808411	T3_H3K27ac_1093		chr1	62901194	62903577	T4_H3K27ac_1093		chr7	1608975	1611622	T5_H3K27ac_1093
	chr1	31418646	31418938	RT4_K27ac_1094		chr1	41818892	41819458	SW_K27ac_1094		chr1	21727672	21728031	SC_K27ac_1094		chr1	33282050	33282979	HT1376_K27ac_1094		chr1	16292785	16293385	T1_H3K27ac_1_1094		chr10	43890331	43893184	T3_H3K27ac_1094		chrX	15352593	15353701	T4_H3K27ac_1094		chr9	137214969	137218027	T5_H3K27ac_1094
	chr1	31426688	31427056	RT4_K27ac_1095		chr1	41819836	41820441	SW_K27ac_1095		chr1	21728399	21728935	SC_K27ac_1095		chr1	33283169	33284191	HT1376_K27ac_1095		chr1	16301867	16302824	T1_H3K27ac_1_1095		chr1	228295930	228298072	T3_H3K27ac_1095		chr8	90994907	90997072	T4_H3K27ac_1095		chr10	101380415	101382327	T5_H3K27ac_1095
	chr1	31437635	31437881	RT4_K27ac_1096		chr1	41823421	41824110	SW_K27ac_1096		chr1	21729073	21729309	SC_K27ac_1096		chr1	33305377	33306159	HT1376_K27ac_1096		chr1	16310139	16310443	T1_H3K27ac_1_1096		chr14	55594582	55599018	T3_H3K27ac_1096		chr1	16160166	16162368	T4_H3K27ac_1096		chr5	138088012	138090087	T5_H3K27ac_1096
	chr1	31448651	31449213	RT4_K27ac_1097		chr1	41827199	41827594	SW_K27ac_1097		chr1	21766052	21766559	SC_K27ac_1097		chr1	33366474	33367550	HT1376_K27ac_1097		chr1	16339451	16339797	T1_H3K27ac_1_1097		chr21	30395678	30398099	T3_H3K27ac_1097		chr19	55849702	55850927	T4_H3K27ac_1097		chr9	21334636	21335883	T5_H3K27ac_1097
	chr1	31461515	31461782	RT4_K27ac_1098		chr1	41884046	41884577	SW_K27ac_1098		chr1	21766628	21767432	SC_K27ac_1098		chr1	33399486	33400277	HT1376_K27ac_1098		chr1	16343880	16344360	T1_H3K27ac_1_1098		chr22	50326772	50329118	T3_H3K27ac_1098		chr2	44587949	44589850	T4_H3K27ac_1098		chr1	112161663	112164193	T5_H3K27ac_1098
	chr1	31471208	31471530	RT4_K27ac_1099		chr1	41884814	41885235	SW_K27ac_1099		chr1	21860869	21861247	SC_K27ac_1099		chr1	33411522	33411911	HT1376_K27ac_1099		chr1	16403143	16403381	T1_H3K27ac_1_1099		chr3	48126654	48131156	T3_H3K27ac_1099		chr6	160112844	160115388	T4_H3K27ac_1099		chr1	161013808	161017757	T5_H3K27ac_1099
	chr1	31471861	31472298	RT4_K27ac_1100		chr1	41947641	41948250	SW_K27ac_1100		chr1	21894464	21894877	SC_K27ac_1100		chr1	33418304	33418980	HT1376_K27ac_1100		chr1	16414185	16414452	T1_H3K27ac_1_1100		chr4	15653006	15658337	T3_H3K27ac_1100		chr10	70660318	70662008	T4_H3K27ac_1100		chr1	179923856	179925016	T5_H3K27ac_1100
	chr1	31479802	31480823	RT4_K27ac_1101		chr1	41959102	41959467	SW_K27ac_1101		chr1	21895142	21895797	SC_K27ac_1101		chr1	33419263	33420216	HT1376_K27ac_1101		chr1	16414677	16414908	T1_H3K27ac_1_1101		chr7	158607177	158615828	T3_H3K27ac_1101		chr12	108956313	108957718	T4_H3K27ac_1101		chr19	54641347	54642701	T5_H3K27ac_1101
	chr1	31497974	31499024	RT4_K27ac_1102		chr1	41961270	41961923	SW_K27ac_1102		chr1	21933976	21934312	SC_K27ac_1102		chr1	33427620	33427937	HT1376_K27ac_1102		chr1	16415068	16415804	T1_H3K27ac_1_1102		chr9	95527252	95528365	T3_H3K27ac_1102		chr16	20910825	20913598	T4_H3K27ac_1102		chr1	159822857	159825210	T5_H3K27ac_1102
	chr1	31511083	31511358	RT4_K27ac_1103		chr1	41962093	41962807	SW_K27ac_1103		chr1	21940972	21941429	SC_K27ac_1103		chr1	33428961	33430511	HT1376_K27ac_1103		chr1	16444199	16444364	T1_H3K27ac_1_1103		chr12	11323489	11324911	T3_H3K27ac_1103		chr19	38826019	38828177	T4_H3K27ac_1103		chr12	12509228	12512058	T5_H3K27ac_1103
	chr1	31520435	31521040	RT4_K27ac_1104		chr1	41964371	41964590	SW_K27ac_1104		chr1	21949184	21949666	SC_K27ac_1104		chr1	33446613	33447407	HT1376_K27ac_1104		chr1	16447817	16448326	T1_H3K27ac_1_1104		chr12	122983840	122986150	T3_H3K27ac_1104		chr10	106095978	106099603	T4_H3K27ac_1104		chr16	3312471	3315391	T5_H3K27ac_1104
	chr1	31537678	31539134	RT4_K27ac_1105		chr1	41966141	41966554	SW_K27ac_1105		chr1	21951508	21951770	SC_K27ac_1105		chr1	33454533	33455125	HT1376_K27ac_1105		chr1	16448562	16449071	T1_H3K27ac_1_1105		chr14	73602670	73604550	T3_H3K27ac_1105		chr14	39900144	39903084	T4_H3K27ac_1105		chr1	89662409	89666184	T5_H3K27ac_1105
	chr1	31584107	31584916	RT4_K27ac_1106		chr1	42092345	42092607	SW_K27ac_1106		chr1	21952486	21954632	SC_K27ac_1106		chr1	33456322	33457056	HT1376_K27ac_1106		chr1	16449694	16450082	T1_H3K27ac_1_1106		chr4	175203532	175205963	T3_H3K27ac_1106		chr15	68569165	68572258	T4_H3K27ac_1106		chr19	12034734	12036583	T5_H3K27ac_1106
	chr1	31592857	31593424	RT4_K27ac_1107		chr1	42092998	42093705	SW_K27ac_1107		chr1	21955528	21955892	SC_K27ac_1107		chr1	33457214	33458089	HT1376_K27ac_1107		chr1	16450245	16450818	T1_H3K27ac_1_1107		chr12	110718133	110722726	T3_H3K27ac_1107		chr17	17183269	17185185	T4_H3K27ac_1107		chr1	92763869	92765658	T5_H3K27ac_1107
	chr1	31627330	31627825	RT4_K27ac_1108		chr1	42135959	42136172	SW_K27ac_1108		chr1	21960724	21961110	SC_K27ac_1108		chr1	33483937	33484267	HT1376_K27ac_1108		chr1	16454768	16454934	T1_H3K27ac_1_1108		chr14	65380558	65382253	T3_H3K27ac_1108		chr5	134239799	134241967	T4_H3K27ac_1108		chr2	227699538	227702028	T5_H3K27ac_1108
	chr1	31627990	31628590	RT4_K27ac_1109		chr1	42136507	42136865	SW_K27ac_1109		chr1	21964422	21966544	SC_K27ac_1109		chr1	33501671	33502544	HT1376_K27ac_1109		chr1	16460943	16461153	T1_H3K27ac_1_1109		chr5	150457836	150463408	T3_H3K27ac_1109		chr5	175874343	175876669	T4_H3K27ac_1109		chr2	62114514	62116799	T5_H3K27ac_1109
	chr1	31635225	31635711	RT4_K27ac_1110		chr1	42137647	42137980	SW_K27ac_1110		chr1	22090444	22091460	SC_K27ac_1110		chr1	33516035	33516596	HT1376_K27ac_1110		chr1	16464619	16464847	T1_H3K27ac_1_1110		chr6	159234055	159241469	T3_H3K27ac_1110		chr6	108878784	108885018	T4_H3K27ac_1110		chr3	194205384	194208894	T5_H3K27ac_1110
	chr1	31643243	31645616	RT4_K27ac_1111		chr1	42269159	42269509	SW_K27ac_1111		chr1	22091578	22091929	SC_K27ac_1111		chr1	33546196	33546624	HT1376_K27ac_1111		chr1	16465212	16466644	T1_H3K27ac_1_1111		chr6	31938179	31940997	T3_H3K27ac_1111		chr9	35814003	35815922	T4_H3K27ac_1111		chr3	63896711	63899421	T5_H3K27ac_1111
	chr1	31663515	31663719	RT4_K27ac_1112		chr1	42269850	42270191	SW_K27ac_1112		chr1	22092497	22092897	SC_K27ac_1112		chr1	33564540	33565065	HT1376_K27ac_1112		chr1	16467633	16468573	T1_H3K27ac_1_1112		chr11	8984777	8987602	T3_H3K27ac_1112		chrX	47518057	47519124	T4_H3K27ac_1112		chr5	43555955	43558226	T5_H3K27ac_1112
	chr1	31734263	31735281	RT4_K27ac_1113		chr1	42317613	42318301	SW_K27ac_1113		chr1	22107752	22111138	SC_K27ac_1113		chr1	33565242	33565803	HT1376_K27ac_1113		chr1	16469703	16469933	T1_H3K27ac_1_1113		chr11	65236917	65241454	T3_H3K27ac_1113		chr1	6843916	6845156	T4_H3K27ac_1113		chr5	78279416	78282257	T5_H3K27ac_1113
	chr1	31745956	31747478	RT4_K27ac_1114		chr1	42327112	42327454	SW_K27ac_1114		chr1	22113400	22114659	SC_K27ac_1114		chr1	33592465	33594786	HT1376_K27ac_1114		chr1	16470123	16474207	T1_H3K27ac_1_1114		chr10	1093912	1096123	T3_H3K27ac_1114		chr22	21354831	21357462	T4_H3K27ac_1114		chr6	114175848	114182204	T5_H3K27ac_1114
	chr1	31769148	31770457	RT4_K27ac_1115		chr1	42327629	42328241	SW_K27ac_1115		chr1	22114777	22116264	SC_K27ac_1115		chr1	33632648	33634144	HT1376_K27ac_1115		chr1	16474482	16474772	T1_H3K27ac_1_1115		chr16	31043073	31046425	T3_H3K27ac_1115		chr15	74286312	74288914	T4_H3K27ac_1115		chrY	2802572	2805202	T5_H3K27ac_1115
	chr1	31831128	31831762	RT4_K27ac_1116		chr1	42328908	42329290	SW_K27ac_1116		chr1	22127498	22127727	SC_K27ac_1116		chr1	33646682	33647695	HT1376_K27ac_1116		chr1	16474929	16475339	T1_H3K27ac_1_1116		chr19	34662019	34665773	T3_H3K27ac_1116		chr2	128567078	128569343	T4_H3K27ac_1116		chr14	55737568	55739182	T5_H3K27ac_1116
	chr1	31854033	31855308	RT4_K27ac_1117		chr1	42356094	42357408	SW_K27ac_1117		chr1	22127977	22128384	SC_K27ac_1117		chr1	33684921	33686781	HT1376_K27ac_1117		chr1	16475526	16475991	T1_H3K27ac_1_1117		chr11	111471856	111475169	T3_H3K27ac_1117		chrX	122993086	122995431	T4_H3K27ac_1117		chr5	107715782	107719225	T5_H3K27ac_1117
	chr1	31862291	31863834	RT4_K27ac_1118		chr1	42357911	42358256	SW_K27ac_1118		chr1	22187632	22188716	SC_K27ac_1118		chr1	33687016	33687863	HT1376_K27ac_1118		chr1	16477141	16478403	T1_H3K27ac_1_1118		chr11	694565	696683	T3_H3K27ac_1118		chr6	26122053	26127911	T4_H3K27ac_1118		chr6	12007455	12014515	T5_H3K27ac_1118
	chr1	31886082	31887741	RT4_K27ac_1119		chr1	42366155	42366381	SW_K27ac_1119		chr1	22188870	22189473	SC_K27ac_1119		chr1	33709566	33710622	HT1376_K27ac_1119		chr1	16478558	16483361	T1_H3K27ac_1_1119		chr3	33757906	33760431	T3_H3K27ac_1119		chr11	67980585	67982006	T4_H3K27ac_1119		chr11	74203164	74205441	T5_H3K27ac_1119
	chr1	31888809	31889340	RT4_K27ac_1120		chr1	42366793	42367002	SW_K27ac_1120		chr1	22194923	22195289	SC_K27ac_1120		chr1	33721072	33721808	HT1376_K27ac_1120		chr1	16485880	16486045	T1_H3K27ac_1_1120		chr6	158243191	158247024	T3_H3K27ac_1120		chr16	30074892	30078871	T4_H3K27ac_1120		chr11	74458998	74461377	T5_H3K27ac_1120
	chr1	31894458	31895695	RT4_K27ac_1121		chr1	42367185	42367900	SW_K27ac_1121		chr1	22195946	22197068	SC_K27ac_1121		chr1	33722459	33724131	HT1376_K27ac_1121		chr1	16491028	16492294	T1_H3K27ac_1_1121		chr13	50570051	50572641	T3_H3K27ac_1121		chr2	128282830	128285173	T4_H3K27ac_1121		chr19	42386209	42390256	T5_H3K27ac_1121
	chr1	31907482	31908730	RT4_K27ac_1122		chr1	42630127	42631210	SW_K27ac_1122		chr1	22198701	22199291	SC_K27ac_1122		chr1	33777922	33778233	HT1376_K27ac_1122		chr1	16493702	16495494	T1_H3K27ac_1_1122		chr17	7587799	7592441	T3_H3K27ac_1122		chr21	42790330	42793508	T4_H3K27ac_1122		chr7	32535057	32536032	T5_H3K27ac_1122
	chr1	31909777	31910335	RT4_K27ac_1123		chr1	42631394	42632315	SW_K27ac_1123		chr1	22228519	22228837	SC_K27ac_1123		chr1	33803947	33805214	HT1376_K27ac_1123		chr1	16498121	16503676	T1_H3K27ac_1_1123		chr12	59988821	59993384	T3_H3K27ac_1123		chr22	36779336	36784805	T4_H3K27ac_1123		chr8	102216027	102219756	T5_H3K27ac_1123
	chr1	31916872	31918575	RT4_K27ac_1124		chr1	42633140	42633790	SW_K27ac_1124		chr1	22230809	22231461	SC_K27ac_1124		chr1	33814092	33815340	HT1376_K27ac_1124		chr1	16505086	16505332	T1_H3K27ac_1_1124		chr12	76423408	76427074	T3_H3K27ac_1124		chr2	64369868	64371651	T4_H3K27ac_1124		chr9	101865216	101870053	T5_H3K27ac_1124
	chr1	31943848	31945692	RT4_K27ac_1125		chr1	42634093	42634624	SW_K27ac_1125		chr1	22232782	22233189	SC_K27ac_1125		chr1	33895866	33896608	HT1376_K27ac_1125		chr1	16506454	16507120	T1_H3K27ac_1_1125		chr17	42142847	42144679	T3_H3K27ac_1125		chr4	56261382	56265289	T4_H3K27ac_1125		chr16	30620313	30621980	T5_H3K27ac_1125
	chr1	31949566	31951112	RT4_K27ac_1126		chr1	42657060	42657389	SW_K27ac_1126		chr1	22246701	22247101	SC_K27ac_1126		chr1	33896808	33897220	HT1376_K27ac_1126		chr1	16507412	16508532	T1_H3K27ac_1_1126		chr3	150476418	150482298	T3_H3K27ac_1126		chr5	132297752	132300275	T4_H3K27ac_1126		chr12	8184567	8186568	T5_H3K27ac_1126
	chr1	31955440	31956704	RT4_K27ac_1127		chr1	42657530	42657903	SW_K27ac_1127		chr1	22257384	22258741	SC_K27ac_1127		chr1	33937921	33939093	HT1376_K27ac_1127		chr1	16508771	16509703	T1_H3K27ac_1_1127		chr8	67577920	67580518	T3_H3K27ac_1127		chr13	107219262	107221036	T4_H3K27ac_1127		chr10	18946512	18949588	T5_H3K27ac_1127
	chr1	31970364	31971507	RT4_K27ac_1128		chr1	42671095	42671265	SW_K27ac_1128		chr1	22258977	22261131	SC_K27ac_1128		chr1	35220006	35221046	HT1376_K27ac_1128		chr1	16510000	16510303	T1_H3K27ac_1_1128		chr1	32416329	32424303	T3_H3K27ac_1128		chr3	9833317	9835571	T4_H3K27ac_1128		chr1	25572599	25574581	T5_H3K27ac_1128
	chr1	31976183	31977616	RT4_K27ac_1129		chr1	42671392	42671900	SW_K27ac_1129		chr1	22261654	22263662	SC_K27ac_1129		chr1	35221218	35221908	HT1376_K27ac_1129		chr1	16510481	16511716	T1_H3K27ac_1_1129		chr11	114270154	114272675	T3_H3K27ac_1129		chr19	54692123	54696243	T4_H3K27ac_1129		chr17	36955094	36956607	T5_H3K27ac_1129
	chr1	31989186	31989827	RT4_K27ac_1130		chr1	42672509	42672904	SW_K27ac_1130		chr1	22263963	22264631	SC_K27ac_1130		chr1	35227647	35229216	HT1376_K27ac_1130		chr1	16515449	16515614	T1_H3K27ac_1_1130		chr11	2420008	2421684	T3_H3K27ac_1130		chr6	30849836	30852009	T4_H3K27ac_1130		chr18	12882368	12885286	T5_H3K27ac_1130
	chr1	31997295	31997463	RT4_K27ac_1131		chr1	42675074	42676255	SW_K27ac_1131		chr1	22265473	22265821	SC_K27ac_1131		chr1	35229380	35230121	HT1376_K27ac_1131		chr1	16532571	16532838	T1_H3K27ac_1_1131		chr3	142165454	142167449	T3_H3K27ac_1131		chr19	48280268	48282420	T4_H3K27ac_1131		chr12	49450930	49455263	T5_H3K27ac_1131
	chr1	32014176	32014561	RT4_K27ac_1132		chr1	42676472	42677164	SW_K27ac_1132		chr1	22266407	22266874	SC_K27ac_1132		chr1	35245364	35245847	HT1376_K27ac_1132		chr1	16533194	16534208	T1_H3K27ac_1_1132		chr12	69752992	69754496	T3_H3K27ac_1132		chr1	15942711	15946055	T4_H3K27ac_1132		chr2	38603291	38605259	T5_H3K27ac_1132
	chr1	32014728	32015592	RT4_K27ac_1133		chr1	42680257	42680574	SW_K27ac_1133		chr1	22281767	22282509	SC_K27ac_1133		chr1	35246729	35247785	HT1376_K27ac_1133		chr1	16536527	16536692	T1_H3K27ac_1_1133		chr5	131829609	131837962	T3_H3K27ac_1133		chr1	1092955	1094467	T4_H3K27ac_1133		chr7	148394831	148397569	T5_H3K27ac_1133
	chr1	32027897	32029773	RT4_K27ac_1134		chr1	42799897	42800907	SW_K27ac_1134		chr1	22282629	22284369	SC_K27ac_1134		chr1	35247958	35248510	HT1376_K27ac_1134		chr1	16544209	16544875	T1_H3K27ac_1_1134		chr1	154147721	154156334	T3_H3K27ac_1134		chr2	191745656	191748232	T4_H3K27ac_1134		chr9	107824703	107829154	T5_H3K27ac_1134
	chr1	32038645	32041922	RT4_K27ac_1135		chr1	42801047	42801646	SW_K27ac_1135		chr1	22284616	22284871	SC_K27ac_1135		chr1	35271777	35273528	HT1376_K27ac_1135		chr1	16563075	16564220	T1_H3K27ac_1_1135		chr3	27523579	27526789	T3_H3K27ac_1135		chr17	39939479	39943200	T4_H3K27ac_1135		chr10	6017271	6020441	T5_H3K27ac_1135
	chr1	32047755	32048212	RT4_K27ac_1136		chr1	42921426	42922978	SW_K27ac_1136		chr1	22288302	22288519	SC_K27ac_1136		chr1	35273764	35274152	HT1376_K27ac_1136		chr1	16575380	16575545	T1_H3K27ac_1_1136		chr2	26100319	26102408	T3_H3K27ac_1136		chr20	33291554	33293056	T4_H3K27ac_1136		chr16	48640069	48647843	T5_H3K27ac_1136
	chr1	32083472	32084048	RT4_K27ac_1137		chr1	42928474	42928662	SW_K27ac_1137		chr1	22290219	22290584	SC_K27ac_1137		chr1	35324431	35325382	HT1376_K27ac_1137		chr1	16677704	16677974	T1_H3K27ac_1_1137		chr1	29062703	29065448	T3_H3K27ac_1137		chr6	170101432	170103310	T4_H3K27ac_1137		chr21	27106136	27109093	T5_H3K27ac_1137
	chr1	32103663	32104653	RT4_K27ac_1138		chr1	42928963	42929555	SW_K27ac_1138		chr1	22292339	22292623	SC_K27ac_1138		chr1	35331149	35332222	HT1376_K27ac_1138		chr1	16678132	16679661	T1_H3K27ac_1_1138		chr2	64750742	64753176	T3_H3K27ac_1138		chr8	59571264	59573044	T4_H3K27ac_1138		chr22	41808258	41810814	T5_H3K27ac_1138
	chr1	32109715	32111183	RT4_K27ac_1139		chr1	42998571	42999503	SW_K27ac_1139		chr1	22292696	22293640	SC_K27ac_1139		chr1	35450447	35451136	HT1376_K27ac_1139		chr1	16692920	16695201	T1_H3K27ac_1_1139		chr3	48342112	48343792	T3_H3K27ac_1139		chr8	101732569	101734435	T4_H3K27ac_1139		chr9	19229808	19232434	T5_H3K27ac_1139
	chr1	32116328	32117232	RT4_K27ac_1140		chr1	43123639	43123853	SW_K27ac_1140		chr1	22301001	22301272	SC_K27ac_1140		chr1	35496571	35497700	HT1376_K27ac_1140		chr1	16701707	16701979	T1_H3K27ac_1_1140		chr19	54959043	54961793	T3_H3K27ac_1140		chr1	207924306	207926590	T4_H3K27ac_1140		chr1	33281489	33285125	T5_H3K27ac_1140
	chr1	32131605	32132230	RT4_K27ac_1141		chr1	43124073	43124781	SW_K27ac_1141		chr1	22345050	22345631	SC_K27ac_1141		chr1	35544625	35545843	HT1376_K27ac_1141		chr1	16702335	16702793	T1_H3K27ac_1_1141		chr9	95891988	95897657	T3_H3K27ac_1141		chr11	62605955	62610805	T4_H3K27ac_1141		chr2	20099706	20102507	T5_H3K27ac_1141
	chr1	32135466	32136002	RT4_K27ac_1142		chr1	43146983	43147852	SW_K27ac_1142		chr1	22345741	22346370	SC_K27ac_1142		chr1	35550711	35551403	HT1376_K27ac_1142		chr1	16713716	16714169	T1_H3K27ac_1_1142		chr12	22777284	22779739	T3_H3K27ac_1142		chr1	16479854	16483016	T4_H3K27ac_1142		chr22	41251706	41254046	T5_H3K27ac_1142
	chr1	32190765	32191322	RT4_K27ac_1143		chr1	43148146	43148482	SW_K27ac_1143		chr1	22351145	22352959	SC_K27ac_1143		chr1	35586141	35586426	HT1376_K27ac_1143		chr1	16729680	16729845	T1_H3K27ac_1_1143		chr22	50966391	50973899	T3_H3K27ac_1143		chr1	198125405	198129166	T4_H3K27ac_1143		chr4	174291076	174294432	T5_H3K27ac_1143
	chr1	32210806	32211122	RT4_K27ac_1144		chr1	43148744	43149091	SW_K27ac_1144		chr1	22366276	22366446	SC_K27ac_1144		chr1	35657672	35658744	HT1376_K27ac_1144		chr1	16767219	16768324	T1_H3K27ac_1_1144		chr4	54929247	54932560	T3_H3K27ac_1144		chr16	2801174	2803902	T4_H3K27ac_1144		chr7	105925726	105926880	T5_H3K27ac_1144
	chr1	32218600	32219959	RT4_K27ac_1145		chr1	43157606	43157835	SW_K27ac_1145		chr1	22369247	22369805	SC_K27ac_1145		chr1	35659061	35659487	HT1376_K27ac_1145		chr1	16768515	16769954	T1_H3K27ac_1_1145		chr3	52442815	52444275	T3_H3K27ac_1145		chr2	162016246	162018453	T4_H3K27ac_1145		chr17	1010795	1015597	T5_H3K27ac_1145
	chr1	32229301	32229617	RT4_K27ac_1146		chr1	43158372	43158941	SW_K27ac_1146		chr1	22370456	22370662	SC_K27ac_1146		chr1	35733982	35734859	HT1376_K27ac_1146		chr1	16770902	16771387	T1_H3K27ac_1_1146		chr5	158632049	158637256	T3_H3K27ac_1146		chr2	220142577	220145616	T4_H3K27ac_1146		chr13	79979110	79981232	T5_H3K27ac_1146
	chr1	32250403	32250859	RT4_K27ac_1147		chr1	43232931	43233442	SW_K27ac_1147		chr1	22370805	22371686	SC_K27ac_1147		chr1	35767333	35767753	HT1376_K27ac_1147		chr1	16817484	16817900	T1_H3K27ac_1_1147		chr11	9633757	9636998	T3_H3K27ac_1147		chr3	56716024	56717755	T4_H3K27ac_1147		chr3	169489466	169492081	T5_H3K27ac_1147
	chr1	32253831	32254276	RT4_K27ac_1148		chr1	43282294	43283082	SW_K27ac_1148		chr1	22371873	22372103	SC_K27ac_1148		chr1	35822548	35822799	HT1376_K27ac_1148		chr1	16825334	16825658	T1_H3K27ac_1_1148		chr14	24910516	24912620	T3_H3K27ac_1148		chr5	132386564	132388784	T4_H3K27ac_1148		chr8	135843651	135845922	T5_H3K27ac_1148
	chr1	32254468	32254844	RT4_K27ac_1149		chr1	43312325	43312669	SW_K27ac_1149		chr1	22372298	22372573	SC_K27ac_1149		chr1	35892665	35892859	HT1376_K27ac_1149		chr1	16825829	16826092	T1_H3K27ac_1_1149		chr17	5388774	5391132	T3_H3K27ac_1149		chr1	26946147	26948500	T4_H3K27ac_1149		chr2	162015946	162018649	T5_H3K27ac_1149
	chr1	32263065	32264409	RT4_K27ac_1150		chr1	43390195	43390560	SW_K27ac_1150		chr1	22378701	22378969	SC_K27ac_1150		chr1	35917733	35918156	HT1376_K27ac_1150		chr1	16839145	16839310	T1_H3K27ac_1_1150		chr18	20512589	20514273	T3_H3K27ac_1150		chr19	49955990	49957979	T4_H3K27ac_1150		chr7	55432300	55434611	T5_H3K27ac_1150
	chr1	32264602	32265062	RT4_K27ac_1151		chr1	43396166	43396404	SW_K27ac_1151		chr1	22379098	22380993	SC_K27ac_1151		chr1	35933305	35933592	HT1376_K27ac_1151		chr1	16939473	16940373	T1_H3K27ac_1_1151		chr20	42837832	42840874	T3_H3K27ac_1151		chr9	96212742	96213927	T4_H3K27ac_1151		chr1	16008989	16012529	T5_H3K27ac_1151
	chr1	32279918	32280381	RT4_K27ac_1152		chr1	43396785	43398598	SW_K27ac_1152		chr1	22384323	22384854	SC_K27ac_1152		chr1	35988528	35988865	HT1376_K27ac_1152		chr1	16950278	16950463	T1_H3K27ac_1_1152		chr2	200775565	200776971	T3_H3K27ac_1152		chr17	74486467	74492035	T4_H3K27ac_1152		chr1	19809272	19813914	T5_H3K27ac_1152
	chr1	32320915	32321905	RT4_K27ac_1153		chr1	43398884	43399097	SW_K27ac_1153		chr1	22384926	22385480	SC_K27ac_1153		chr1	35989816	35990158	HT1376_K27ac_1153		chr1	16950802	16951075	T1_H3K27ac_1_1153		chr7	35733307	35735616	T3_H3K27ac_1153		chr19	46086788	46088912	T4_H3K27ac_1153		chr14	55573599	55575762	T5_H3K27ac_1153
	chr1	32345954	32346581	RT4_K27ac_1154		chr1	43399764	43400416	SW_K27ac_1154		chr1	22395181	22395423	SC_K27ac_1154		chr1	35998161	35998977	HT1376_K27ac_1154		chr1	16970606	16972002	T1_H3K27ac_1_1154		chr4	83350078	83352781	T3_H3K27ac_1154		chr10	38264652	38266019	T4_H3K27ac_1154		chr1	68150877	68153127	T5_H3K27ac_1154
	chr1	32347005	32347882	RT4_K27ac_1155		chr1	43400698	43403003	SW_K27ac_1155		chr1	22395729	22396798	SC_K27ac_1155		chr1	36004627	36005898	HT1376_K27ac_1155		chr1	17215610	17216418	T1_H3K27ac_1_1155		chr8	37593546	37596433	T3_H3K27ac_1155		chr9	127630586	127635660	T4_H3K27ac_1155		chr17	33411320	33417670	T5_H3K27ac_1155
	chr1	32361708	32362438	RT4_K27ac_1156		chr1	43403120	43410938	SW_K27ac_1156		chr1	22396998	22397461	SC_K27ac_1156		chr1	36022564	36024100	HT1376_K27ac_1156		chr1	17222602	17223530	T1_H3K27ac_1_1156		chr9	96337577	96341368	T3_H3K27ac_1156		chr5	139553986	139555868	T4_H3K27ac_1156		chr17	66243063	66245698	T5_H3K27ac_1156
	chr1	32363096	32364077	RT4_K27ac_1157		chr1	43411096	43411506	SW_K27ac_1157		chr1	22415450	22415684	SC_K27ac_1157		chr1	36070014	36070483	HT1376_K27ac_1157		chr1	17228849	17229349	T1_H3K27ac_1_1157		chr10	64892944	64894505	T3_H3K27ac_1157		chr10	99893320	99895385	T4_H3K27ac_1157		chr4	78077504	78080198	T5_H3K27ac_1157
	chr1	32375626	32375922	RT4_K27ac_1158		chr1	43411764	43412850	SW_K27ac_1158		chr1	22458434	22459576	SC_K27ac_1158		chr1	36106151	36107739	HT1376_K27ac_1158		chr1	17230308	17231709	T1_H3K27ac_1_1158		chr19	45244219	45260640	T3_H3K27ac_1158		chr1	155531746	155534844	T4_H3K27ac_1158		chr6	111302381	111303808	T5_H3K27ac_1158
	chr1	32379704	32379989	RT4_K27ac_1159		chr1	43413569	43413847	SW_K27ac_1159		chr1	22462505	22462837	SC_K27ac_1159		chr1	36183822	36184866	HT1376_K27ac_1159		chr1	17231993	17232330	T1_H3K27ac_1_1159		chr22	50975281	50984864	T3_H3K27ac_1159		chr12	56509219	56511845	T4_H3K27ac_1159		chr6	159234815	159241118	T5_H3K27ac_1159
	chr1	32386236	32386518	RT4_K27ac_1160		chr1	43415234	43415732	SW_K27ac_1160		chr1	22463047	22463696	SC_K27ac_1160		chr1	36234789	36235634	HT1376_K27ac_1160		chr1	17240120	17240360	T1_H3K27ac_1_1160		chr7	108208952	108211723	T3_H3K27ac_1160		chr15	65183595	65190938	T4_H3K27ac_1160		chr7	115849696	115854644	T5_H3K27ac_1160
	chr1	32387727	32388414	RT4_K27ac_1161		chr1	43418213	43419086	SW_K27ac_1161		chr1	22464129	22464590	SC_K27ac_1161		chr1	36273257	36274522	HT1376_K27ac_1161		chr1	17240772	17241732	T1_H3K27ac_1_1161		chr1	151431448	151432600	T3_H3K27ac_1161		chr4	6910578	6911746	T4_H3K27ac_1161		chrX	40943046	40947530	T5_H3K27ac_1161
	chr1	32395580	32395931	RT4_K27ac_1162		chr1	43422451	43424941	SW_K27ac_1162		chr1	22464939	22466306	SC_K27ac_1162		chr1	36334687	36336241	HT1376_K27ac_1162		chr1	17274868	17275129	T1_H3K27ac_1_1162		chr12	123008749	123012851	T3_H3K27ac_1162		chr6	42857960	42859189	T4_H3K27ac_1162		chr10	74077829	74084091	T5_H3K27ac_1162
	chr1	32398249	32398796	RT4_K27ac_1163		chr1	43432169	43432349	SW_K27ac_1163		chr1	22466978	22467857	SC_K27ac_1163		chr1	36348446	36349477	HT1376_K27ac_1163		chr1	17305566	17305990	T1_H3K27ac_1_1163		chr7	140395678	140398010	T3_H3K27ac_1163		chr8	103874558	103877211	T4_H3K27ac_1163		chr13	28022650	28026264	T5_H3K27ac_1163
	chr1	32399529	32399863	RT4_K27ac_1164		chr1	43478630	43478993	SW_K27ac_1164		chr1	22468514	22469124	SC_K27ac_1164		chr1	36395814	36397461	HT1376_K27ac_1164		chr1	17306398	17306702	T1_H3K27ac_1_1164		chr9	77566359	77568896	T3_H3K27ac_1164		chr8	146125426	146128404	T4_H3K27ac_1164		chr15	102190881	102194314	T5_H3K27ac_1164
	chr1	32400717	32401143	RT4_K27ac_1165		chr1	43600913	43601826	SW_K27ac_1165		chr1	22470076	22470486	SC_K27ac_1165		chr1	36438841	36439143	HT1376_K27ac_1165		chr1	17337735	17338071	T1_H3K27ac_1_1165		chr10	135119837	135122878	T3_H3K27ac_1165		chr14	23386631	23389772	T4_H3K27ac_1165		chr19	47103583	47107445	T5_H3K27ac_1165
	chr1	32401435	32401874	RT4_K27ac_1166		chr1	43602047	43603111	SW_K27ac_1166		chr1	22511591	22512391	SC_K27ac_1166		chr1	36472693	36473305	HT1376_K27ac_1166		chr1	17367756	17367946	T1_H3K27ac_1_1166		chr13	113861977	113864754	T3_H3K27ac_1166		chr15	89180669	89184658	T4_H3K27ac_1166		chr20	61555554	61558857	T5_H3K27ac_1166
	chr1	32402846	32403950	RT4_K27ac_1167		chr1	43618137	43618646	SW_K27ac_1167		chr1	22555042	22556114	SC_K27ac_1167		chr1	36474354	36474689	HT1376_K27ac_1167		chr1	17379978	17380523	T1_H3K27ac_1_1167		chr14	50063898	50066420	T3_H3K27ac_1167		chr22	28313976	28316972	T4_H3K27ac_1167		chr2	220040621	220043775	T5_H3K27ac_1167
	chr1	32404175	32405815	RT4_K27ac_1168		chr1	43637088	43638255	SW_K27ac_1168		chr1	22556188	22557209	SC_K27ac_1168		chr1	36500090	36500427	HT1376_K27ac_1168		chr1	17380897	17381123	T1_H3K27ac_1_1168		chr6	32810382	32814052	T3_H3K27ac_1168		chr14	24911517	24912610	T4_H3K27ac_1168		chr3	49448069	49451215	T5_H3K27ac_1168
	chr1	32420008	32421590	RT4_K27ac_1169		chr1	43664212	43666110	SW_K27ac_1169		chr1	22559425	22560446	SC_K27ac_1169		chr1	36534835	36535058	HT1376_K27ac_1169		chr1	17455331	17455520	T1_H3K27ac_1_1169		chr4	89299710	89300762	T3_H3K27ac_1169		chr16	11347740	11350991	T4_H3K27ac_1169		chr7	108165178	108167725	T5_H3K27ac_1169
	chr1	32421871	32423460	RT4_K27ac_1170		chr1	43670906	43672513	SW_K27ac_1170		chr1	22562946	22564108	SC_K27ac_1170		chr1	36545898	36547527	HT1376_K27ac_1170		chr1	17508319	17508545	T1_H3K27ac_1_1170		chr14	21148913	21153987	T3_H3K27ac_1170		chr21	40719827	40721134	T4_H3K27ac_1170		chr7	129588385	129592906	T5_H3K27ac_1170
	chr1	32429445	32429811	RT4_K27ac_1171		chr1	43672743	43673802	SW_K27ac_1171		chr1	22564295	22565330	SC_K27ac_1171		chr1	36554004	36555756	HT1376_K27ac_1171		chr1	17516666	17517353	T1_H3K27ac_1_1171		chr14	68140501	68142489	T3_H3K27ac_1171		chr22	46447711	46451475	T4_H3K27ac_1171		chr15	78832036	78834510	T5_H3K27ac_1171
	chr1	32451378	32451728	RT4_K27ac_1172		chr1	43735764	43736130	SW_K27ac_1172		chr1	22565558	22566118	SC_K27ac_1172		chr1	36564678	36565451	HT1376_K27ac_1172		chr1	17518433	17518598	T1_H3K27ac_1_1172		chr8	42394879	42399589	T3_H3K27ac_1172		chr3	100427801	100429696	T4_H3K27ac_1172		chr20	18487417	18489194	T5_H3K27ac_1172
	chr1	32478748	32480476	RT4_K27ac_1173		chr1	43736361	43736685	SW_K27ac_1173		chr1	22580795	22581402	SC_K27ac_1173		chr1	36600638	36601473	HT1376_K27ac_1173		chr1	17519315	17519773	T1_H3K27ac_1_1173		chr12	133656157	133658465	T3_H3K27ac_1173		chr1	161357944	161361371	T4_H3K27ac_1173		chr10	93168659	93170979	T5_H3K27ac_1173
	chr1	32492423	32492945	RT4_K27ac_1174		chr1	43761206	43761637	SW_K27ac_1174		chr1	22601164	22601777	SC_K27ac_1174		chr1	36614667	36615133	HT1376_K27ac_1174		chr1	17527076	17527666	T1_H3K27ac_1_1174		chr6	30646963	30659796	T3_H3K27ac_1174		chr1	180601149	180602299	T4_H3K27ac_1174		chr11	67979342	67982178	T5_H3K27ac_1174
	chr1	32528439	32529298	RT4_K27ac_1175		chr1	43810517	43810847	SW_K27ac_1175		chr1	22601967	22602444	SC_K27ac_1175		chr1	36615445	36616510	HT1376_K27ac_1175		chr1	17527916	17529043	T1_H3K27ac_1_1175		chr1	244209650	244212395	T3_H3K27ac_1175		chr1	46151160	46154113	T4_H3K27ac_1175		chr18	60189350	60194724	T5_H3K27ac_1175
	chr1	32530047	32530473	RT4_K27ac_1176		chr1	43814081	43815566	SW_K27ac_1176		chr1	22739100	22739989	SC_K27ac_1176		chr1	36620950	36622876	HT1376_K27ac_1176		chr1	17533357	17533592	T1_H3K27ac_1_1176		chr14	39642999	39645802	T3_H3K27ac_1176		chr14	81685268	81688397	T4_H3K27ac_1176		chr2	64750609	64753446	T5_H3K27ac_1176
	chr1	32531852	32532430	RT4_K27ac_1177		chr1	43823776	43824352	SW_K27ac_1177		chr1	22741149	22741317	SC_K27ac_1177		chr1	36626404	36626986	HT1376_K27ac_1177		chr1	17533976	17534207	T1_H3K27ac_1_1177		chr17	15160565	15168843	T3_H3K27ac_1177		chr3	160938552	160939671	T4_H3K27ac_1177		chr6	36513811	36515775	T5_H3K27ac_1177
	chr1	32537459	32539174	RT4_K27ac_1178		chr1	43824648	43825237	SW_K27ac_1178		chr1	22778391	22779245	SC_K27ac_1178		chr1	36627207	36628045	HT1376_K27ac_1178		chr1	17538539	17538763	T1_H3K27ac_1_1178		chr2	161347914	161351148	T3_H3K27ac_1178		chr5	133511776	133513448	T4_H3K27ac_1178		chr12	28342808	28344547	T5_H3K27ac_1178
	chr1	32566389	32566853	RT4_K27ac_1179		chr1	43831526	43832152	SW_K27ac_1179		chr1	22795206	22795424	SC_K27ac_1179		chr1	36640694	36641561	HT1376_K27ac_1179		chr1	17555004	17556022	T1_H3K27ac_1_1179		chr22	41863894	41866319	T3_H3K27ac_1179		chr5	154236556	154239875	T4_H3K27ac_1179		chr10	30721281	30727404	T5_H3K27ac_1179
	chr1	32567084	32567530	RT4_K27ac_1180		chr1	43832355	43833757	SW_K27ac_1180		chr1	23036897	23037196	SC_K27ac_1180		chr1	36653097	36653902	HT1376_K27ac_1180		chr1	17559241	17559601	T1_H3K27ac_1_1180		chr13	22177362	22178683	T3_H3K27ac_1180		chr14	69280008	69283955	T4_H3K27ac_1180		chr21	38736966	38741355	T5_H3K27ac_1180
	chr1	32573619	32575028	RT4_K27ac_1181		chr1	43833868	43834813	SW_K27ac_1181		chr1	23038014	23038510	SC_K27ac_1181		chr1	36662210	36662783	HT1376_K27ac_1181		chr1	17559784	17561182	T1_H3K27ac_1_1181		chr10	102756384	102762797	T3_H3K27ac_1181		chr3	49448268	49450538	T4_H3K27ac_1181		chr10	1100682	1103502	T5_H3K27ac_1181
	chr1	32581812	32582277	RT4_K27ac_1182		chr1	43854819	43855985	SW_K27ac_1182		chr1	23062026	23062473	SC_K27ac_1182		chr1	36689057	36689740	HT1376_K27ac_1182		chr1	17572099	17573328	T1_H3K27ac_1_1182		chr12	54809391	54818992	T3_H3K27ac_1182		chr5	43312932	43314414	T4_H3K27ac_1182		chr2	85131889	85135913	T5_H3K27ac_1182
	chr1	32590421	32590765	RT4_K27ac_1183		chr1	43888482	43889364	SW_K27ac_1183		chr1	23065868	23066312	SC_K27ac_1183		chr1	36689946	36690895	HT1376_K27ac_1183		chr1	17575554	17576178	T1_H3K27ac_1_1183		chr2	27434099	27436317	T3_H3K27ac_1183		chrX	118602323	118603079	T4_H3K27ac_1183		chr14	50997374	51000755	T5_H3K27ac_1183
	chr1	32598161	32599066	RT4_K27ac_1184		chr1	43889996	43890316	SW_K27ac_1184		chr1	23066387	23067465	SC_K27ac_1184		chr1	36713527	36714792	HT1376_K27ac_1184		chr1	17576534	17576724	T1_H3K27ac_1_1184		chr5	77070965	77072549	T3_H3K27ac_1184		chrX	153606237	153607090	T4_H3K27ac_1184		chr3	159480088	159484932	T5_H3K27ac_1184
	chr1	32599282	32599837	RT4_K27ac_1185		chr1	43903246	43903597	SW_K27ac_1185		chr1	23075538	23078569	SC_K27ac_1185		chr1	36771085	36772847	HT1376_K27ac_1185		chr1	17576876	17577205	T1_H3K27ac_1_1185		chr22	30751017	30753605	T3_H3K27ac_1185		chr1	150038726	150040926	T4_H3K27ac_1185		chr1	153755138	153756862	T5_H3K27ac_1185
	chr1	32604451	32604964	RT4_K27ac_1186		chr1	43937553	43938076	SW_K27ac_1186		chr1	23134880	23135586	SC_K27ac_1186		chr1	36787037	36787289	HT1376_K27ac_1186		chr1	17613673	17613838	T1_H3K27ac_1_1186		chr1	174967669	174969835	T3_H3K27ac_1186		chr1	155945957	155952274	T4_H3K27ac_1186		chr1	44411259	44413677	T5_H3K27ac_1186
	chr1	32628469	32629142	RT4_K27ac_1187		chr1	43941099	43941601	SW_K27ac_1187		chr1	23144166	23144564	SC_K27ac_1187		chr1	36788590	36789434	HT1376_K27ac_1187		chr1	17616568	17616794	T1_H3K27ac_1_1187		chr5	154236232	154240187	T3_H3K27ac_1187		chr14	32546292	32547213	T4_H3K27ac_1187		chr17	54989020	54994696	T5_H3K27ac_1187
	chr1	32644807	32646423	RT4_K27ac_1188		chr1	43942143	43942413	SW_K27ac_1188		chr1	23152094	23154354	SC_K27ac_1188		chr1	36808655	36809063	HT1376_K27ac_1188		chr1	17630570	17630854	T1_H3K27ac_1_1188		chr1	24150585	24152478	T3_H3K27ac_1188		chr2	152117226	152118637	T4_H3K27ac_1188		chr4	6910443	6913303	T5_H3K27ac_1188
	chr1	32670775	32671905	RT4_K27ac_1189		chr1	43975165	43975704	SW_K27ac_1189		chr1	23154466	23156993	SC_K27ac_1189		chr1	36816230	36817824	HT1376_K27ac_1189		chr1	17703694	17703920	T1_H3K27ac_1_1189		chr1	110089152	110091950	T3_H3K27ac_1189		chr4	186346247	186347775	T4_H3K27ac_1189		chr7	107203758	107205428	T5_H3K27ac_1189
	chr1	32681552	32681780	RT4_K27ac_1190		chr1	43976026	43976623	SW_K27ac_1190		chr1	23157147	23158645	SC_K27ac_1190		chr1	36838973	36840900	HT1376_K27ac_1190		chr1	17758708	17759045	T1_H3K27ac_1_1190		chr1	26601167	26608577	T3_H3K27ac_1190		chr5	67510520	67513311	T4_H3K27ac_1190		chr12	57022242	57024374	T5_H3K27ac_1190
	chr1	32687491	32688611	RT4_K27ac_1191		chr1	43996599	43998273	SW_K27ac_1191		chr1	23158810	23160165	SC_K27ac_1191		chr1	36850428	36851517	HT1376_K27ac_1191		chr1	17764236	17766151	T1_H3K27ac_1_1191		chr8	145006573	145021346	T3_H3K27ac_1191		chr9	100393844	100397103	T4_H3K27ac_1191		chr13	28711555	28714913	T5_H3K27ac_1191
	chr1	32698690	32699268	RT4_K27ac_1192		chr1	44000941	44001929	SW_K27ac_1192		chr1	23160618	23161001	SC_K27ac_1192		chr1	36851739	36852834	HT1376_K27ac_1192		chr1	17766397	17766740	T1_H3K27ac_1_1192		chr6	47443827	47447073	T3_H3K27ac_1192		chr16	75182290	75183134	T4_H3K27ac_1192		chr5	133511365	133514220	T5_H3K27ac_1192
	chr1	32706039	32707133	RT4_K27ac_1193		chr1	44002062	44002314	SW_K27ac_1193		chr1	23187144	23187357	SC_K27ac_1193		chr1	36862876	36863943	HT1376_K27ac_1193		chr1	17802573	17802804	T1_H3K27ac_1_1193		chr1	14026077	14029211	T3_H3K27ac_1193		chr3	129611349	129612572	T4_H3K27ac_1193		chr19	48972514	48973602	T5_H3K27ac_1193
	chr1	32738984	32739639	RT4_K27ac_1194		chr1	44009922	44010305	SW_K27ac_1194		chr1	23187979	23188484	SC_K27ac_1194		chr1	36873737	36874500	HT1376_K27ac_1194		chr1	17806192	17806384	T1_H3K27ac_1_1194		chr1	176174434	176176671	T3_H3K27ac_1194		chr10	126489934	126491272	T4_H3K27ac_1194		chr1	172500687	172503836	T5_H3K27ac_1194
	chr1	32755177	32756735	RT4_K27ac_1195		chr1	44010847	44012706	SW_K27ac_1195		chr1	23205305	23205864	SC_K27ac_1195		chr1	36881008	36881719	HT1376_K27ac_1195		chr1	17842854	17843262	T1_H3K27ac_1_1195		chr13	20206983	20209271	T3_H3K27ac_1195		chr17	42263143	42265381	T4_H3K27ac_1195		chr17	76356429	76357592	T5_H3K27ac_1195
	chr1	32756937	32758474	RT4_K27ac_1196		chr1	44012973	44013248	SW_K27ac_1196		chr1	23302556	23303042	SC_K27ac_1196		chr1	36882014	36882586	HT1376_K27ac_1196		chr1	17846107	17846729	T1_H3K27ac_1_1196		chr1	54870528	54875339	T3_H3K27ac_1196		chr7	5552641	5554635	T4_H3K27ac_1196		chr7	108209108	108211215	T5_H3K27ac_1196
	chr1	32764208	32764586	RT4_K27ac_1197		chr1	44013415	44013696	SW_K27ac_1197		chr1	23330371	23330585	SC_K27ac_1197		chr1	36882785	36883237	HT1376_K27ac_1197		chr1	17846883	17848174	T1_H3K27ac_1_1197		chr19	54973175	54977232	T3_H3K27ac_1197		chr9	4678600	4680439	T4_H3K27ac_1197		chr5	175959894	175966140	T5_H3K27ac_1197
	chr1	32772877	32773179	RT4_K27ac_1198		chr1	44013857	44014102	SW_K27ac_1198		chr1	23336593	23338662	SC_K27ac_1198		chr1	36886668	36887035	HT1376_K27ac_1198		chr1	17848331	17848509	T1_H3K27ac_1_1198		chr2	234474322	234475618	T3_H3K27ac_1198		chr11	67234728	67237293	T4_H3K27ac_1198		chr3	196466176	196468894	T5_H3K27ac_1198
	chr1	32787072	32788545	RT4_K27ac_1199		chr1	44014962	44015598	SW_K27ac_1199		chr1	23340431	23340854	SC_K27ac_1199		chr1	36891893	36892494	HT1376_K27ac_1199		chr1	17851203	17851438	T1_H3K27ac_1_1199		chr8	9004418	9009286	T3_H3K27ac_1199		chr19	12791725	12793269	T4_H3K27ac_1199		chr7	72970499	72972543	T5_H3K27ac_1199
	chr1	32800717	32801695	RT4_K27ac_1200		chr1	44016183	44017293	SW_K27ac_1200		chr1	23344997	23347498	SC_K27ac_1200		chr1	36901766	36902757	HT1376_K27ac_1200		chr1	17852745	17852910	T1_H3K27ac_1_1200		chrX	73832754	73835228	T3_H3K27ac_1200		chr8	123792587	123795897	T4_H3K27ac_1200		chr11	61128091	61130838	T5_H3K27ac_1200
	chr1	32807286	32807658	RT4_K27ac_1201		chr1	44017863	44018188	SW_K27ac_1201		chr1	23347555	23348043	SC_K27ac_1201		chr1	36915479	36916963	HT1376_K27ac_1201		chr1	17853859	17854231	T1_H3K27ac_1_1201		chr10	123872291	123874689	T3_H3K27ac_1201		chr1	28995554	28996464	T4_H3K27ac_1201		chr1	45271707	45278581	T5_H3K27ac_1201
	chr1	32816502	32817794	RT4_K27ac_1202		chr1	44022436	44023127	SW_K27ac_1202		chr1	23425442	23425849	SC_K27ac_1202		chr1	36929196	36930565	HT1376_K27ac_1202		chr1	17859199	17859470	T1_H3K27ac_1_1202		chr12	110886935	110888644	T3_H3K27ac_1202		chr17	60141308	60143403	T4_H3K27ac_1202		chr15	83477228	83480925	T5_H3K27ac_1202
	chr1	32852514	32852749	RT4_K27ac_1203		chr1	44023751	44024706	SW_K27ac_1203		chr1	23426242	23428073	SC_K27ac_1203		chr1	37914001	37914945	HT1376_K27ac_1203		chr1	17864794	17865014	T1_H3K27ac_1_1203		chr17	78119960	78122047	T3_H3K27ac_1203		chr17	20946632	20947753	T4_H3K27ac_1203		chr19	1247442	1255508	T5_H3K27ac_1203
	chr1	32859537	32861013	RT4_K27ac_1204		chr1	44047035	44047488	SW_K27ac_1204		chr1	23428137	23430275	SC_K27ac_1204		chr1	37937114	37937395	HT1376_K27ac_1204		chr1	17865240	17868403	T1_H3K27ac_1_1204		chr2	153573115	153575923	T3_H3K27ac_1204		chr17	78119660	78121917	T4_H3K27ac_1204		chr2	161261923	161265379	T5_H3K27ac_1204
	chr1	32910641	32910951	RT4_K27ac_1205		chr1	44048142	44048578	SW_K27ac_1205		chr1	23430393	23430779	SC_K27ac_1205		chr1	37940228	37941292	HT1376_K27ac_1205		chr1	17869837	17870247	T1_H3K27ac_1_1205		chr13	28711626	28714394	T3_H3K27ac_1205		chr1	2515534	2518058	T4_H3K27ac_1205		chr4	39043683	39050676	T5_H3K27ac_1205
	chr1	32911956	32912333	RT4_K27ac_1206		chr1	44115006	44115475	SW_K27ac_1206		chr1	23437946	23438130	SC_K27ac_1206		chr1	37942134	37943586	HT1376_K27ac_1206		chr1	17871416	17871941	T1_H3K27ac_1_1206		chr9	35095836	35096974	T3_H3K27ac_1206		chr20	47537469	47539511	T4_H3K27ac_1206		chr6	116599123	116601885	T5_H3K27ac_1206
	chr1	32929784	32930543	RT4_K27ac_1207		chr1	44115744	44116555	SW_K27ac_1207		chr1	23439407	23439715	SC_K27ac_1207		chr1	37944843	37945294	HT1376_K27ac_1207		chr1	17877927	17878099	T1_H3K27ac_1_1207		chr9	4983696	4986697	T3_H3K27ac_1207		chr1	151431461	151432560	T4_H3K27ac_1207		chr9	114657894	114661955	T5_H3K27ac_1207
	chr1	32951482	32953303	RT4_K27ac_1208		chr1	44350735	44351011	SW_K27ac_1208		chr1	23440746	23441237	SC_K27ac_1208		chr1	37945629	37946004	HT1376_K27ac_1208		chr1	17878707	17878989	T1_H3K27ac_1_1208		chr10	73523478	73535264	T3_H3K27ac_1208		chr1	33281985	33285300	T4_H3K27ac_1208		chr10	74113006	74115281	T5_H3K27ac_1208
	chr1	32959354	32960159	RT4_K27ac_1209		chr1	44411822	44413199	SW_K27ac_1209		chr1	23452200	23453640	SC_K27ac_1209		chr1	37979362	37981056	HT1376_K27ac_1209		chr1	17879184	17880415	T1_H3K27ac_1_1209		chr11	101980292	101983780	T3_H3K27ac_1209		chr5	138774748	138775651	T4_H3K27ac_1209		chr1	205599055	205601875	T5_H3K27ac_1209
	chr1	32965689	32966576	RT4_K27ac_1210		chr1	44435736	44435932	SW_K27ac_1210		chr1	23453829	23454413	SC_K27ac_1210		chr1	37992187	37992371	HT1376_K27ac_1210		chr1	17880643	17881627	T1_H3K27ac_1_1210		chr1	2486297	2489521	T3_H3K27ac_1210		chr19	41254855	41258558	T4_H3K27ac_1210		chr1	2477802	2481532	T5_H3K27ac_1210
	chr1	32986254	32986692	RT4_K27ac_1211		chr1	44440156	44440424	SW_K27ac_1211		chr1	23457867	23458341	SC_K27ac_1211		chr1	37999283	38000808	HT1376_K27ac_1211		chr1	17881884	17882101	T1_H3K27ac_1_1211		chr14	24681487	24683177	T3_H3K27ac_1211		chr16	30968183	30970174	T4_H3K27ac_1211		chr17	62656825	62659481	T5_H3K27ac_1211
	chr1	33004735	33005213	RT4_K27ac_1212		chr1	44440595	44441490	SW_K27ac_1212		chr1	23489201	23489689	SC_K27ac_1212		chr1	38019207	38020348	HT1376_K27ac_1212		chr1	17885047	17886373	T1_H3K27ac_1_1212		chr1	65885021	65888588	T3_H3K27ac_1212		chr7	106807614	106811006	T4_H3K27ac_1212		chr18	57566005	57569004	T5_H3K27ac_1212
	chr1	33005381	33005887	RT4_K27ac_1213		chr1	44445073	44445896	SW_K27ac_1213		chr1	23491042	23491359	SC_K27ac_1213		chr1	38060827	38062137	HT1376_K27ac_1213		chr1	17886556	17888181	T1_H3K27ac_1_1213		chr20	36154205	36157059	T3_H3K27ac_1213		chr7	152161057	152162333	T4_H3K27ac_1213		chr22	21270352	21273646	T5_H3K27ac_1213
	chr1	33072368	33073090	RT4_K27ac_1214		chr1	44456340	44458158	SW_K27ac_1214		chr1	23493593	23496871	SC_K27ac_1214		chr1	38155652	38156182	HT1376_K27ac_1214		chr1	17888349	17889912	T1_H3K27ac_1_1214		chr22	30279023	30280288	T3_H3K27ac_1214		chr20	61436156	61437782	T4_H3K27ac_1214		chr2	39345741	39352407	T5_H3K27ac_1214
	chr1	33077500	33078435	RT4_K27ac_1215		chr1	44489694	44490697	SW_K27ac_1215		chr1	23503812	23504925	SC_K27ac_1215		chr1	38157341	38157919	HT1376_K27ac_1215		chr1	17890658	17891521	T1_H3K27ac_1_1215		chr3	187869841	187878416	T3_H3K27ac_1215		chr11	64035299	64038421	T4_H3K27ac_1215		chr5	130598047	130601556	T5_H3K27ac_1215
	chr1	33102409	33102689	RT4_K27ac_1216		chr1	44490823	44492139	SW_K27ac_1216		chr1	23511770	23512124	SC_K27ac_1216		chr1	38158134	38158750	HT1376_K27ac_1216		chr1	17894361	17894738	T1_H3K27ac_1_1216		chrX	1510144	1512633	T3_H3K27ac_1216		chr3	169482220	169483282	T4_H3K27ac_1216		chr8	11716541	11726849	T5_H3K27ac_1216
	chr1	33115794	33117489	RT4_K27ac_1217		chr1	44493786	44494177	SW_K27ac_1217		chr1	23513250	23517131	SC_K27ac_1217		chr1	38259096	38259820	HT1376_K27ac_1217		chr1	17894981	17896930	T1_H3K27ac_1_1217		chr12	92539890	92541849	T3_H3K27ac_1217		chr12	1799609	1800970	T4_H3K27ac_1217		chr6	16128688	16131232	T5_H3K27ac_1217
	chr1	33181103	33181636	RT4_K27ac_1218		chr1	44494447	44494831	SW_K27ac_1218		chr1	23519634	23519834	SC_K27ac_1218		chr1	38272878	38274683	HT1376_K27ac_1218		chr1	17899668	17899938	T1_H3K27ac_1_1218		chr7	27134483	27142238	T3_H3K27ac_1218		chr13	28711694	28713872	T4_H3K27ac_1218		chr6	26536121	26539712	T5_H3K27ac_1218
	chr1	33181873	33183077	RT4_K27ac_1219		chr1	44495209	44497257	SW_K27ac_1219		chr1	23520113	23524725	SC_K27ac_1219		chr1	38324548	38325925	HT1376_K27ac_1219		chr1	17906187	17906714	T1_H3K27ac_1_1219		chr1	112049646	112051943	T3_H3K27ac_1219		chr6	7050174	7053366	T4_H3K27ac_1219		chr7	138791008	138797477	T5_H3K27ac_1219
	chr1	33190184	33191571	RT4_K27ac_1220		chr1	44509373	44510082	SW_K27ac_1220		chr1	23524924	23525774	SC_K27ac_1220		chr1	38330644	38331107	HT1376_K27ac_1220		chr1	17906900	17907496	T1_H3K27ac_1_1220		chr19	12844391	12846164	T3_H3K27ac_1220		chr4	38665629	38669646	T4_H3K27ac_1220		chr14	34528465	34530731	T5_H3K27ac_1220
	chr1	33195764	33196021	RT4_K27ac_1221		chr1	44620882	44621237	SW_K27ac_1221		chr1	23543231	23543752	SC_K27ac_1221		chr1	38331262	38331954	HT1376_K27ac_1221		chr1	17907906	17908612	T1_H3K27ac_1_1221		chr19	58608205	58610675	T3_H3K27ac_1221		chr6	26203484	26207094	T4_H3K27ac_1221		chr1	70686506	70688098	T5_H3K27ac_1221
	chr1	33196182	33197481	RT4_K27ac_1222		chr1	44679152	44679452	SW_K27ac_1222		chr1	23551267	23551606	SC_K27ac_1222		chr1	38341356	38343101	HT1376_K27ac_1222		chr1	17908905	17909445	T1_H3K27ac_1_1222		chr1	114353521	114355849	T3_H3K27ac_1222		chr12	122326654	122327427	T4_H3K27ac_1222		chr17	56407579	56421853	T5_H3K27ac_1222
	chr1	33202533	33203065	RT4_K27ac_1223		chr1	44792604	44793478	SW_K27ac_1223		chr1	23551795	23552150	SC_K27ac_1223		chr1	38373042	38373671	HT1376_K27ac_1223		chr1	17911014	17911179	T1_H3K27ac_1_1223		chr12	46776104	46781858	T3_H3K27ac_1223		chr7	127291212	127292849	T4_H3K27ac_1223		chr13	34114905	34118772	T5_H3K27ac_1223
	chr1	33207122	33207361	RT4_K27ac_1224		chr1	44793952	44794976	SW_K27ac_1224		chr1	23609163	23609601	SC_K27ac_1224		chr1	38396490	38397470	HT1376_K27ac_1224		chr1	17912919	17915159	T1_H3K27ac_1_1224		chr20	34637837	34639718	T3_H3K27ac_1224		chr12	122905843	122908331	T4_H3K27ac_1224		chr15	70390458	70392007	T5_H3K27ac_1224
	chr1	33207540	33208731	RT4_K27ac_1225		chr1	44820173	44820895	SW_K27ac_1225		chr1	23667867	23668126	SC_K27ac_1225		chr1	38423852	38424468	HT1376_K27ac_1225		chr1	17915389	17915554	T1_H3K27ac_1_1225		chr3	14165776	14168500	T3_H3K27ac_1225		chr8	107669642	107671137	T4_H3K27ac_1225		chr11	65147525	65154800	T5_H3K27ac_1225
	chr1	33219605	33221245	RT4_K27ac_1226		chr1	45097135	45098459	SW_K27ac_1226		chr1	23669536	23672294	SC_K27ac_1226		chr1	38424716	38425064	HT1376_K27ac_1226		chr1	17944678	17945272	T1_H3K27ac_1_1226		chr6	30707281	30713542	T3_H3K27ac_1226		chr20	48806639	48811126	T4_H3K27ac_1226		chr4	56812654	56816821	T5_H3K27ac_1226
	chr1	33224691	33224989	RT4_K27ac_1227		chr1	45139849	45140265	SW_K27ac_1227		chr1	23693311	23694811	SC_K27ac_1227		chr1	38441624	38442074	HT1376_K27ac_1227		chr1	17949990	17950155	T1_H3K27ac_1_1227		chr7	104622646	104626214	T3_H3K27ac_1227		chr14	76618222	76619028	T4_H3K27ac_1227		chr20	32250710	32252742	T5_H3K27ac_1227
	chr1	33225200	33227247	RT4_K27ac_1228		chr1	45140481	45141060	SW_K27ac_1228		chr1	23694931	23697972	SC_K27ac_1228		chr1	38454763	38455699	HT1376_K27ac_1228		chr1	17950566	17950731	T1_H3K27ac_1_1228		chr9	35725319	35733999	T3_H3K27ac_1228		chr6	33042698	33044663	T4_H3K27ac_1228		chr5	58332457	58336375	T5_H3K27ac_1228
	chr1	33227407	33227626	RT4_K27ac_1229		chr1	45141826	45142269	SW_K27ac_1229		chr1	23703071	23704003	SC_K27ac_1229		chr1	38455951	38456409	HT1376_K27ac_1229		chr1	17950965	17951249	T1_H3K27ac_1_1229		chr2	11482844	11486721	T3_H3K27ac_1229		chr17	7737233	7740842	T4_H3K27ac_1229		chr11	65478027	65480897	T5_H3K27ac_1229
	chr1	33232391	33232756	RT4_K27ac_1230		chr1	45187508	45187789	SW_K27ac_1230		chr1	23704302	23704605	SC_K27ac_1230		chr1	38464786	38465765	HT1376_K27ac_1230		chr1	18095104	18095302	T1_H3K27ac_1_1230		chr9	99178970	99183857	T3_H3K27ac_1230		chr22	38597357	38599542	T4_H3K27ac_1230		chr20	17548586	17551684	T5_H3K27ac_1230
	chr1	33239693	33240317	RT4_K27ac_1231		chr1	45196662	45197155	SW_K27ac_1231		chr1	23720452	23720723	SC_K27ac_1231		chr1	38470369	38471220	HT1376_K27ac_1231		chr1	18179012	18179177	T1_H3K27ac_1_1231		chr19	1652590	1653607	T3_H3K27ac_1231		chr7	45024639	45027031	T4_H3K27ac_1231		chr2	182756532	182758651	T5_H3K27ac_1231
	chr1	33240789	33241517	RT4_K27ac_1232		chr1	45205549	45205970	SW_K27ac_1232		chr1	23721109	23721528	SC_K27ac_1232		chr1	38477815	38479224	HT1376_K27ac_1232		chr1	18490549	18490714	T1_H3K27ac_1_1232		chr14	67706953	67709203	T3_H3K27ac_1232		chr12	46762804	46767779	T4_H3K27ac_1232		chr7	105921698	105925516	T5_H3K27ac_1232
	chr1	33245820	33246995	RT4_K27ac_1233		chr1	45240627	45243016	SW_K27ac_1233		chr1	23726916	23731224	SC_K27ac_1233		chr1	38493336	38493565	HT1376_K27ac_1233		chr1	18692971	18693344	T1_H3K27ac_1_1233		chrX	347197	348650	T3_H3K27ac_1233		chr13	103497372	103499836	T4_H3K27ac_1233		chr8	131053419	131055889	T5_H3K27ac_1233
	chr1	33255263	33255689	RT4_K27ac_1234		chr1	45265166	45265917	SW_K27ac_1234		chr1	23750914	23751570	SC_K27ac_1234		chr1	38592104	38592540	HT1376_K27ac_1234		chr1	18766756	18767192	T1_H3K27ac_1_1234		chr10	27147091	27149932	T3_H3K27ac_1234		chr16	74329904	74331773	T4_H3K27ac_1234		chr3	69130406	69137063	T5_H3K27ac_1234
	chr1	33275900	33276274	RT4_K27ac_1235		chr1	45266050	45266787	SW_K27ac_1235		chr1	23809885	23810156	SC_K27ac_1235		chr1	38604118	38604941	HT1376_K27ac_1235		chr1	18767401	18767827	T1_H3K27ac_1_1235		chr10	52381705	52385841	T3_H3K27ac_1235		chr2	86848869	86851355	T4_H3K27ac_1235		chr7	150019665	150022334	T5_H3K27ac_1235
	chr1	33282146	33282977	RT4_K27ac_1236		chr1	45267087	45268539	SW_K27ac_1236		chr1	23810299	23810636	SC_K27ac_1236		chr1	38993231	38993531	HT1376_K27ac_1236		chr1	18790519	18791753	T1_H3K27ac_1_1236		chr12	69863678	69865025	T3_H3K27ac_1236		chr13	41237087	41240798	T4_H3K27ac_1236		chr6	11233047	11235245	T5_H3K27ac_1236
	chr1	33283184	33284273	RT4_K27ac_1237		chr1	45268729	45269249	SW_K27ac_1237		chr1	23810835	23811145	SC_K27ac_1237		chr1	39200730	39202234	HT1376_K27ac_1237		chr1	18805644	18806065	T1_H3K27ac_1_1237		chr1	46150952	46154544	T3_H3K27ac_1237		chr19	13272587	13276601	T4_H3K27ac_1237		chr10	121355062	121356616	T5_H3K27ac_1237
	chr1	33324766	33325174	RT4_K27ac_1238		chr1	45269496	45270485	SW_K27ac_1238		chr1	23866552	23866765	SC_K27ac_1238		chr1	39205839	39206264	HT1376_K27ac_1238		chr1	18806250	18806824	T1_H3K27ac_1_1238		chr16	11676225	11682080	T3_H3K27ac_1238		chr2	157188318	157192347	T4_H3K27ac_1238		chr10	81961231	81968054	T5_H3K27ac_1238
	chr1	33347239	33347479	RT4_K27ac_1239		chr1	45271962	45274800	SW_K27ac_1239		chr1	23880482	23881378	SC_K27ac_1239		chr1	39206432	39207614	HT1376_K27ac_1239		chr1	18806985	18808132	T1_H3K27ac_1_1239		chr1	8935184	8940876	T3_H3K27ac_1239		chr2	238600821	238603900	T4_H3K27ac_1239		chr1	224301402	224302780	T5_H3K27ac_1239
	chr1	33366406	33367481	RT4_K27ac_1240		chr1	45284835	45285415	SW_K27ac_1240		chr1	23881577	23888992	SC_K27ac_1240		chr1	39314912	39315224	HT1376_K27ac_1240		chr1	18992884	18993741	T1_H3K27ac_1_1240		chr20	23329874	23332412	T3_H3K27ac_1240		chr5	137688274	137689792	T4_H3K27ac_1240		chr13	26795350	26797199	T5_H3K27ac_1240
	chr1	33399353	33400385	RT4_K27ac_1241		chr1	45285574	45286047	SW_K27ac_1241		chr1	23889443	23891828	SC_K27ac_1241		chr1	39324029	39325399	HT1376_K27ac_1241		chr1	18995527	18996346	T1_H3K27ac_1_1241		chr2	197033503	197038336	T3_H3K27ac_1241		chr1	110879829	110883156	T4_H3K27ac_1241		chr5	138860255	138865389	T5_H3K27ac_1241
	chr1	33419265	33420442	RT4_K27ac_1242		chr1	45476342	45476953	SW_K27ac_1242		chr1	23891984	23892343	SC_K27ac_1242		chr1	39338318	39339794	HT1376_K27ac_1242		chr1	19225525	19225741	T1_H3K27ac_1_1242		chr22	39101871	39103666	T3_H3K27ac_1242		chr11	57434014	57436824	T4_H3K27ac_1242		chr7	98738029	98742776	T5_H3K27ac_1242
	chr1	33429035	33430715	RT4_K27ac_1243		chr1	45769463	45770286	SW_K27ac_1243		chr1	23903914	23904388	SC_K27ac_1243		chr1	39406904	39407986	HT1376_K27ac_1243		chr1	19228543	19229356	T1_H3K27ac_1_1243		chr3	156391428	156394486	T3_H3K27ac_1243		chr20	60940367	60944013	T4_H3K27ac_1243		chr8	74204911	74208791	T5_H3K27ac_1243
	chr1	33438441	33439030	RT4_K27ac_1244		chr1	45801144	45803123	SW_K27ac_1244		chr1	23911520	23912201	SC_K27ac_1244		chr1	39419149	39419618	HT1376_K27ac_1244		chr1	19229521	19229769	T1_H3K27ac_1_1244		chr1	119682010	119684767	T3_H3K27ac_1244		chr4	48342549	48344639	T4_H3K27ac_1244		chr20	49126052	49137585	T5_H3K27ac_1244
	chr1	33446016	33448214	RT4_K27ac_1245		chr1	45804711	45806384	SW_K27ac_1245		chr1	23912295	23915544	SC_K27ac_1245		chr1	39424179	39424866	HT1376_K27ac_1245		chr1	19229942	19230514	T1_H3K27ac_1_1245		chr6	44204489	44206917	T3_H3K27ac_1245		chr1	180990804	180992072	T4_H3K27ac_1245		chr10	31319964	31322507	T5_H3K27ac_1245
	chr1	33454485	33455044	RT4_K27ac_1246		chr1	45806567	45807230	SW_K27ac_1246		chr1	23916069	23916341	SC_K27ac_1246		chr1	39425416	39425663	HT1376_K27ac_1246		chr1	19234221	19234631	T1_H3K27ac_1_1246		chr6	79787470	79789197	T3_H3K27ac_1246		chr6	30688167	30689869	T4_H3K27ac_1246		chr1	193090621	193092418	T5_H3K27ac_1246
	chr1	33457304	33459417	RT4_K27ac_1247		chr1	45814046	45814303	SW_K27ac_1247		chr1	23917846	23920475	SC_K27ac_1247		chr1	39456354	39457627	HT1376_K27ac_1247		chr1	19234948	19235113	T1_H3K27ac_1_1247		chr9	135544696	135546920	T3_H3K27ac_1247		chr10	91173523	91175949	T4_H3K27ac_1247		chr12	48210212	48216465	T5_H3K27ac_1247
	chr1	33469109	33469583	RT4_K27ac_1248		chr1	45814640	45815341	SW_K27ac_1248		chr1	23953863	23954110	SC_K27ac_1248		chr1	39471986	39472307	HT1376_K27ac_1248		chr1	19239841	19240304	T1_H3K27ac_1_1248		chr15	52121109	52124208	T3_H3K27ac_1248		chr14	23425224	23427209	T4_H3K27ac_1248		chr14	23386564	23388444	T5_H3K27ac_1248
	chr1	33471217	33471425	RT4_K27ac_1249		chr1	45877371	45877727	SW_K27ac_1249		chr1	23960967	23961229	SC_K27ac_1249		chr1	39491262	39493099	HT1376_K27ac_1249		chr1	19248629	19252098	T1_H3K27ac_1_1249		chr15	69108809	69113230	T3_H3K27ac_1249		chr19	9784994	9786281	T4_H3K27ac_1249		chr15	80188294	80191139	T5_H3K27ac_1249
	chr1	33471592	33472055	RT4_K27ac_1250		chr1	45956049	45956811	SW_K27ac_1250		chr1	23961397	23962089	SC_K27ac_1250		chr1	39528968	39529328	HT1376_K27ac_1250		chr1	19252615	19255174	T1_H3K27ac_1_1250		chr7	30633375	30635731	T3_H3K27ac_1250		chr4	87855312	87858501	T4_H3K27ac_1250		chr6	13574013	13575723	T5_H3K27ac_1250
	chr1	33473943	33474221	RT4_K27ac_1251		chr1	45982432	45982620	SW_K27ac_1251		chr1	24018237	24019643	SC_K27ac_1251		chr1	39534595	39534776	HT1376_K27ac_1251		chr1	19259514	19259787	T1_H3K27ac_1_1251		chr11	65147039	65155677	T3_H3K27ac_1251		chr6	75952858	75954089	T4_H3K27ac_1251		chr7	100727823	100730238	T5_H3K27ac_1251
	chr1	33474508	33475085	RT4_K27ac_1252		chr1	45986707	45988491	SW_K27ac_1252		chr1	24069511	24070864	SC_K27ac_1252		chr1	39536704	39537028	HT1376_K27ac_1252		chr1	19263199	19263364	T1_H3K27ac_1_1252		chr1	153755297	153756848	T3_H3K27ac_1252		chrX	153607551	153608948	T4_H3K27ac_1252		chr6	33264918	33268285	T5_H3K27ac_1252
	chr1	33490043	33490654	RT4_K27ac_1253		chr1	46016095	46016300	SW_K27ac_1253		chr1	24071184	24071585	SC_K27ac_1253		chr1	39568882	39569220	HT1376_K27ac_1253		chr1	19268062	19268313	T1_H3K27ac_1_1253		chr3	48883961	48886184	T3_H3K27ac_1253		chrX	47077606	47079785	T4_H3K27ac_1253		chr19	34285679	34288633	T5_H3K27ac_1253
	chr1	33501703	33502558	RT4_K27ac_1254		chr1	46016540	46016872	SW_K27ac_1254		chr1	24104178	24104760	SC_K27ac_1254		chr1	39569711	39572341	HT1376_K27ac_1254		chr1	19271159	19271815	T1_H3K27ac_1_1254		chr10	14878916	14881660	T3_H3K27ac_1254		chr1	36850185	36854153	T4_H3K27ac_1254		chr8	144678601	144679977	T5_H3K27ac_1254
	chr1	33513375	33513849	RT4_K27ac_1255		chr1	46022968	46023326	SW_K27ac_1255		chr1	24104876	24105571	SC_K27ac_1255		chr1	39581163	39583972	HT1376_K27ac_1255		chr1	19272006	19272233	T1_H3K27ac_1_1255		chr10	91173496	91175673	T3_H3K27ac_1255		chr17	79668925	79671599	T4_H3K27ac_1255		chr9	77701529	77704603	T5_H3K27ac_1255
	chr1	33520448	33520732	RT4_K27ac_1256		chr1	46049337	46050753	SW_K27ac_1256		chr1	24116060	24116730	SC_K27ac_1256		chr1	39594233	39594705	HT1376_K27ac_1256		chr1	19273654	19274109	T1_H3K27ac_1_1256		chr11	18654837	18656827	T3_H3K27ac_1256		chr10	72163720	72165212	T4_H3K27ac_1256		chr10	65388169	65391740	T5_H3K27ac_1256
	chr1	33520956	33521452	RT4_K27ac_1257		chr1	46151410	46152747	SW_K27ac_1257		chr1	24116897	24119123	SC_K27ac_1257		chr1	39594931	39595569	HT1376_K27ac_1257		chr1	19274798	19278684	T1_H3K27ac_1_1257		chr15	73922293	73926654	T3_H3K27ac_1257		chr1	119682304	119684254	T4_H3K27ac_1257		chr12	11323230	11325264	T5_H3K27ac_1257
	chr1	33546597	33547219	RT4_K27ac_1258		chr1	46153023	46153722	SW_K27ac_1258		chr1	24119888	24120400	SC_K27ac_1258		chr1	39598101	39599166	HT1376_K27ac_1258		chr1	19280469	19281059	T1_H3K27ac_1_1258		chr16	74329357	74332823	T3_H3K27ac_1258		chr6	42714054	42715697	T4_H3K27ac_1258		chr12	22777268	22779654	T5_H3K27ac_1258
	chr1	33564670	33565009	RT4_K27ac_1259		chr1	46153852	46154453	SW_K27ac_1259		chr1	24125154	24127865	SC_K27ac_1259		chr1	39599760	39600365	HT1376_K27ac_1259		chr1	19281349	19282590	T1_H3K27ac_1_1259		chr17	43661223	43663494	T3_H3K27ac_1259		chr10	102045433	102046853	T4_H3K27ac_1259		chr13	50569426	50572153	T5_H3K27ac_1259
	chr1	33565466	33565773	RT4_K27ac_1260		chr1	46215610	46216350	SW_K27ac_1260		chr1	24151154	24152451	SC_K27ac_1260		chr1	39600866	39601274	HT1376_K27ac_1260		chr1	19282749	19283183	T1_H3K27ac_1_1260		chr17	62205928	62209938	T3_H3K27ac_1260		chr10	6016674	6020256	T4_H3K27ac_1260		chr17	2294487	2306508	T5_H3K27ac_1260
	chr1	33566477	33566980	RT4_K27ac_1261		chr1	46216567	46216799	SW_K27ac_1261		chr1	24191599	24192127	SC_K27ac_1261		chr1	39606251	39606821	HT1376_K27ac_1261		chr1	19284462	19284806	T1_H3K27ac_1_1261		chr4	83819490	83823137	T3_H3K27ac_1261		chr12	10364785	10367325	T4_H3K27ac_1261		chr4	26320068	26326965	T5_H3K27ac_1261
	chr1	33592472	33594001	RT4_K27ac_1262		chr1	46337507	46337719	SW_K27ac_1262		chr1	24192289	24192687	SC_K27ac_1262		chr1	39607026	39607280	HT1376_K27ac_1262		chr1	19304643	19304986	T1_H3K27ac_1_1262		chr9	96212331	96213914	T3_H3K27ac_1262		chr17	79818860	79821055	T4_H3K27ac_1262		chr6	36952769	36955010	T5_H3K27ac_1262
	chr1	33614994	33616671	RT4_K27ac_1263		chr1	46550482	46550794	SW_K27ac_1263		chr1	24194297	24194798	SC_K27ac_1263		chr1	39607458	39609495	HT1376_K27ac_1263		chr1	19334212	19334567	T1_H3K27ac_1_1263		chr1	153962417	153966151	T3_H3K27ac_1263		chr2	172289552	172291606	T4_H3K27ac_1263		chr9	19048480	19050853	T5_H3K27ac_1263
	chr1	33617293	33617703	RT4_K27ac_1264		chr1	46597713	46599251	SW_K27ac_1264		chr1	24261637	24261909	SC_K27ac_1264		chr1	39620099	39620661	HT1376_K27ac_1264		chr1	19336061	19338946	T1_H3K27ac_1_1264		chr3	25704368	25707765	T3_H3K27ac_1264		chr6	74362823	74365516	T4_H3K27ac_1264		chr9	94186275	94188122	T5_H3K27ac_1264
	chr1	33647447	33647762	RT4_K27ac_1265		chr1	46637195	46637605	SW_K27ac_1265		chr1	24278006	24278617	SC_K27ac_1265		chr1	39624768	39625152	HT1376_K27ac_1265		chr1	19339155	19339323	T1_H3K27ac_1_1265		chr17	1387595	1392877	T3_H3K27ac_1265		chr2	145272232	145277364	T4_H3K27ac_1265		chr17	20946660	20947959	T5_H3K27ac_1265
	chr1	33684893	33687618	RT4_K27ac_1266		chr1	46646127	46647891	SW_K27ac_1266		chr1	24285270	24287684	SC_K27ac_1266		chr1	39630581	39631134	HT1376_K27ac_1266		chr1	19354651	19355275	T1_H3K27ac_1_1266		chr2	26255257	26258807	T3_H3K27ac_1266		chr2	192540190	192545515	T4_H3K27ac_1266		chr6	43735785	43741099	T5_H3K27ac_1266
	chr1	33701315	33701760	RT4_K27ac_1267		chr1	46648508	46651174	SW_K27ac_1267		chr1	24305859	24308218	SC_K27ac_1267		chr1	39632781	39633988	HT1376_K27ac_1267		chr1	19355439	19355762	T1_H3K27ac_1_1267		chr17	79824749	79830997	T3_H3K27ac_1267		chr8	144814411	144816868	T4_H3K27ac_1267		chr12	9100817	9104016	T5_H3K27ac_1267
	chr1	33721253	33721797	RT4_K27ac_1268		chr1	46653943	46654545	SW_K27ac_1268		chr1	24344982	24345470	SC_K27ac_1268		chr1	39643444	39645083	HT1376_K27ac_1268		chr1	19356117	19356464	T1_H3K27ac_1_1268		chr1	145447999	145457847	T3_H3K27ac_1268		chr1	156697608	156699353	T4_H3K27ac_1268		chr12	123458480	123460591	T5_H3K27ac_1268
[truncated: 107,553 more rows]
