# Supplementary material for: Subtype-associated epigenomic landscape and 3D genome structure in bladder cancer
Source: Genome Biol. 2021 Apr 15;22:105. doi: 10.1186/s13059-021-02325-y (PMC8048365; doi:10.1186/s13059-021-02325-y)
Supplement: Supplementary file 9 — Additional file 9: Table S8. ATAC-Seq peaks called in each cell line and its proximal/distal location w.r.t transcription start site (TSS). [file 13059_2021_2325_MOESM9_ESM.xlsx]

## Sheet: Table S8-ATACSeq Peaks
Supplementary Table S8: ATAC-Seq peaks called in each cell line and its proximal/distal location w.r.t transcription start site (TSS)
	Cell Line	Total Peaks	Proximal	Distal	%Proximal	%Distal
	RT4	23265	11285	11980	0.485063	0.514937
	SW780	41986	13511	28475	0.321798	0.678202
	SCABER	33923	13089	20834	0.385844	0.614156
	HT1376	28827	12710	16117	0.440906	0.559094
	Average	32000.2			0.408403	0.591597
		RT4 ATAC-Seq Peaks					SCABER ATAC-Seq Peaks					SCABER ATAC-Seq Peaks					HT1376 ATAC-Seq Peaks
		chr	start	end	ID		chr	start	end	ID		chr	start	end	ID		chr	start	end	ID
		chr1	762339	763447	RT4_ATAC_1		chr3	167451870	167453653	SW_ATAC_1		chr1	762185	763452	SC_ATAC_1		chr1	762435	763503	HT_ATAC_1
		chr1	911316	911684	RT4_ATAC_2		chr7	11012663	11014489	SW_ATAC_2		chr1	846622	846860	SC_ATAC_2		chr1	894414	895213	HT_ATAC_2
		chr1	935360	935874	RT4_ATAC_3		chr3	179280349	179281552	SW_ATAC_3		chr1	901503	902484	SC_ATAC_3		chr1	901494	902683	HT_ATAC_3
		chr1	936173	936261	RT4_ATAC_4		chr8	93977002	93978544	SW_ATAC_4		chr1	911268	911705	SC_ATAC_4		chr1	911269	912094	HT_ATAC_4
		chr1	1009083	1009986	RT4_ATAC_5		chr12	83080085	83081698	SW_ATAC_5		chr1	935360	936363	SC_ATAC_5		chr1	934913	936358	HT_ATAC_5
		chr1	1051413	1052112	RT4_ATAC_6		chr3	105587170	105588569	SW_ATAC_6		chr1	948559	950026	SC_ATAC_6		chr1	937259	937456	HT_ATAC_6
		chr1	1092804	1093186	RT4_ATAC_7		chr8	110345538	110347021	SW_ATAC_7		chr1	954789	955551	SC_ATAC_7		chr1	948626	949287	HT_ATAC_7
		chr1	1167307	1167710	RT4_ATAC_8		chr7	21466453	21468158	SW_ATAC_8		chr1	975994	976488	SC_ATAC_8		chr1	954752	955733	HT_ATAC_8
		chr1	1310555	1311000	RT4_ATAC_9		chr1	67389688	67391484	SW_ATAC_9		chr1	1009065	1009945	SC_ATAC_9		chr1	994324	995304	HT_ATAC_9
		chr1	1334643	1335227	RT4_ATAC_10		chr5	118323562	118324962	SW_ATAC_10		chr1	1014823	1015742	SC_ATAC_10		chr1	1009036	1009909	HT_ATAC_10
		chr1	1623818	1625018	RT4_ATAC_11		chr3	98240886	98242067	SW_ATAC_11		chr1	1051205	1052268	SC_ATAC_11		chr1	1010082	1010181	HT_ATAC_11
		chr1	1655694	1656244	RT4_ATAC_12		chr5	118604159	118605279	SW_ATAC_12		chr1	1092790	1093707	SC_ATAC_12		chr1	1014790	1015948	HT_ATAC_12
		chr1	1677755	1678283	RT4_ATAC_13		chr5	108083392	108085433	SW_ATAC_13		chr1	1098099	1098709	SC_ATAC_13		chr1	1051173	1052256	HT_ATAC_13
		chr1	1981292	1981939	RT4_ATAC_14		chr11	105947227	105949122	SW_ATAC_14		chr1	1098796	1098964	SC_ATAC_14		chr1	1166193	1167586	HT_ATAC_14
		chr1	2126125	2126351	RT4_ATAC_15		chr3	98619760	98621091	SW_ATAC_15		chr1	1143505	1143627	SC_ATAC_15		chr1	1208450	1209722	HT_ATAC_15
		chr1	2126432	2126909	RT4_ATAC_16		chr3	114865460	114867190	SW_ATAC_16		chr1	1167283	1167745	SC_ATAC_16		chr1	1243293	1244199	HT_ATAC_16
		chr1	2159028	2159512	RT4_ATAC_17		chrX	3760391	3762322	SW_ATAC_17		chr1	1209169	1209800	SC_ATAC_17		chr1	1259772	1261110	HT_ATAC_17
		chr1	2322576	2323516	RT4_ATAC_18		chr5	98108668	98110390	SW_ATAC_18		chr1	1243728	1244079	SC_ATAC_18		chr1	1279526	1281116	HT_ATAC_18
		chr1	2343925	2344279	RT4_ATAC_19		chr5	151150609	151152364	SW_ATAC_19		chr1	1259759	1260471	SC_ATAC_19		chr1	1299735	1300086	HT_ATAC_19
		chr1	2517778	2518546	RT4_ATAC_20		chr1	249131850	249133412	SW_ATAC_20		chr1	1310523	1311045	SC_ATAC_20		chr1	1310006	1311030	HT_ATAC_20
		chr1	3418559	3418709	RT4_ATAC_21		chr5	157158116	157159104	SW_ATAC_21		chr1	1334430	1335341	SC_ATAC_21		chr1	1334382	1335020	HT_ATAC_21
		chr1	3447487	3447675	RT4_ATAC_22		chr5	96270111	96272296	SW_ATAC_22		chr1	1342391	1343007	SC_ATAC_22		chr1	1341962	1343349	HT_ATAC_22
		chr1	3447772	3448400	RT4_ATAC_23		chr13	60737113	60738892	SW_ATAC_23		chr1	1446859	1447607	SC_ATAC_23		chr1	1406818	1407836	HT_ATAC_23
		chr1	3540905	3541185	RT4_ATAC_24		chr3	167812572	167814473	SW_ATAC_24		chr1	1550463	1550943	SC_ATAC_24		chr1	1446439	1446650	HT_ATAC_24
		chr1	3566414	3566813	RT4_ATAC_25		chr2	153573439	153575729	SW_ATAC_25		chr1	1551101	1551307	SC_ATAC_25		chr1	1446869	1448263	HT_ATAC_25
		chr1	3633875	3634314	RT4_ATAC_26		chr8	110551490	110552901	SW_ATAC_26		chr1	1562488	1562863	SC_ATAC_26		chr1	1509701	1510840	HT_ATAC_26
		chr1	3688970	3689406	RT4_ATAC_27		chr7	33168540	33169645	SW_ATAC_27		chr1	1590378	1590953	SC_ATAC_27		chr1	1550296	1550369	HT_ATAC_27
		chr1	3712976	3713245	RT4_ATAC_28		chr5	162864135	162865236	SW_ATAC_28		chr1	1623863	1625032	SC_ATAC_28		chr1	1550518	1551678	HT_ATAC_28
		chr1	3773691	3774122	RT4_ATAC_29		chr2	163200125	163201364	SW_ATAC_29		chr1	1655522	1656237	SC_ATAC_29		chr1	1589868	1590947	HT_ATAC_29
		chr1	3774208	3774625	RT4_ATAC_30		chr2	81708232	81709492	SW_ATAC_30		chr1	1677739	1678294	SC_ATAC_30		chr1	1623697	1625193	HT_ATAC_30
		chr1	3816595	3817740	RT4_ATAC_31		chr5	118405858	118407556	SW_ATAC_31		chr1	1690124	1690858	SC_ATAC_31		chr1	1655317	1656267	HT_ATAC_31
		chr1	3817848	3818089	RT4_ATAC_32		chr5	43120829	43122568	SW_ATAC_32		chr1	1709800	1710128	SC_ATAC_32		chr1	1677225	1678453	HT_ATAC_32
		chr1	6052014	6052139	RT4_ATAC_33		chr8	82643680	82645277	SW_ATAC_33		chr1	1710216	1710744	SC_ATAC_33		chr1	1690221	1691071	HT_ATAC_33
		chr1	6052220	6052797	RT4_ATAC_34		chr13	53226093	53227424	SW_ATAC_34		chr1	1714443	1714639	SC_ATAC_34		chr1	1709828	1710843	HT_ATAC_34
		chr1	6265893	6266475	RT4_ATAC_35		chr14	81999512	82000623	SW_ATAC_35		chr1	1840095	1840871	SC_ATAC_35		chr1	1790046	1791088	HT_ATAC_35
		chr1	6453165	6454248	RT4_ATAC_36		chr5	102594035	102595707	SW_ATAC_36		chr1	1850311	1851240	SC_ATAC_36		chr1	1837747	1837956	HT_ATAC_36
		chr1	6531600	6531968	RT4_ATAC_37		chr1	70876010	70877485	SW_ATAC_37		chr1	1875510	1875686	SC_ATAC_37		chr1	1838219	1839265	HT_ATAC_37
		chr1	6639835	6640327	RT4_ATAC_38		chr16	77224140	77225765	SW_ATAC_38		chr1	1980989	1981137	SC_ATAC_38		chr1	1839912	1840825	HT_ATAC_38
		chr1	6662858	6663413	RT4_ATAC_39		chrX	3799168	3801009	SW_ATAC_39		chr1	1981292	1982197	SC_ATAC_39		chr1	1850324	1851538	HT_ATAC_39
		chr1	6673222	6673926	RT4_ATAC_40		chr7	33101706	33103148	SW_ATAC_40		chr1	2064464	2065166	SC_ATAC_40		chr1	2066834	2067608	HT_ATAC_40
		chr1	6844515	6845544	RT4_ATAC_41		chr3	113774987	113776115	SW_ATAC_41		chr1	2066842	2067253	SC_ATAC_41		chr1	2126003	2127075	HT_ATAC_41
		chr1	7843826	7844406	RT4_ATAC_42		chr8	92081700	92083069	SW_ATAC_42		chr1	2071297	2071842	SC_ATAC_42		chr1	2135468	2137230	HT_ATAC_42
		chr1	8021191	8022042	RT4_ATAC_43		chr1	236958163	236959701	SW_ATAC_43		chr1	2120790	2121669	SC_ATAC_43		chr1	2159050	2159487	HT_ATAC_43
		chr1	8066419	8066872	RT4_ATAC_44		chr20	39968525	39970154	SW_ATAC_44		chr1	2126115	2126890	SC_ATAC_44		chr1	2313263	2313657	HT_ATAC_44
		chr1	8085825	8086588	RT4_ATAC_45		chr11	105892451	105893606	SW_ATAC_45		chr1	2159024	2159447	SC_ATAC_45		chr1	2322481	2323849	HT_ATAC_45
		chr1	8242222	8243133	RT4_ATAC_46		chr8	66556482	66557574	SW_ATAC_46		chr1	2313263	2313439	SC_ATAC_46		chr1	2343484	2345086	HT_ATAC_46
		chr1	8585832	8586206	RT4_ATAC_47		chr7	12726028	12727519	SW_ATAC_47		chr1	2322509	2323538	SC_ATAC_47		chr1	2457471	2457830	HT_ATAC_47
		chr1	9189141	9189935	RT4_ATAC_48		chr13	73300967	73302476	SW_ATAC_48		chr1	2343920	2344523	SC_ATAC_48		chr1	2464894	2465099	HT_ATAC_48
		chr1	9473074	9473783	RT4_ATAC_49		chr3	88107367	88109271	SW_ATAC_49		chr1	2359752	2360378	SC_ATAC_49		chr1	2466304	2466818	HT_ATAC_49
		chr1	9488814	9489203	RT4_ATAC_50		chr3	5228933	5230764	SW_ATAC_50		chr1	2362628	2362964	SC_ATAC_50		chr1	2477486	2479014	HT_ATAC_50
		chr1	9599247	9599759	RT4_ATAC_51		chrX	15872340	15873790	SW_ATAC_51		chr1	2397953	2398304	SC_ATAC_51		chr1	2479506	2479721	HT_ATAC_51
		chr1	9648580	9648867	RT4_ATAC_52		chr11	125756778	125758488	SW_ATAC_52		chr1	2425467	2426165	SC_ATAC_52		chr1	2517595	2518902	HT_ATAC_52
		chr1	9970058	9971071	RT4_ATAC_53		chr5	98263713	98265585	SW_ATAC_53		chr1	2457582	2458621	SC_ATAC_53		chr1	3229611	3229977	HT_ATAC_53
		chr1	10092587	10093291	RT4_ATAC_54		chr5	159545468	159547201	SW_ATAC_54		chr1	2466161	2466824	SC_ATAC_54		chr1	3369773	3370300	HT_ATAC_54
		chr1	10269917	10270683	RT4_ATAC_55		chr5	114504821	114506438	SW_ATAC_55		chr1	2477363	2477834	SC_ATAC_55		chr1	3370502	3371365	HT_ATAC_55
		chr1	10458490	10459643	RT4_ATAC_56		chr11	82996399	82997868	SW_ATAC_56		chr1	2478364	2478621	SC_ATAC_56		chr1	3398466	3399490	HT_ATAC_56
		chr1	11072261	11072530	RT4_ATAC_57		chrX	3837594	3839201	SW_ATAC_57		chr1	2517700	2518341	SC_ATAC_57		chr1	3407850	3408452	HT_ATAC_57
		chr1	11072613	11072760	RT4_ATAC_58		chr7	87504988	87506506	SW_ATAC_58		chr1	3229561	3230019	SC_ATAC_58		chr1	3420741	3421060	HT_ATAC_58
		chr1	11120022	11120528	RT4_ATAC_59		chr2	198317625	198319070	SW_ATAC_59		chr1	3236573	3236704	SC_ATAC_59		chr1	3447041	3448278	HT_ATAC_59
		chr1	11322375	11322973	RT4_ATAC_60		chr1	244614338	244615707	SW_ATAC_60		chr1	3370611	3371667	SC_ATAC_60		chr1	3459381	3460473	HT_ATAC_60
		chr1	11332937	11333811	RT4_ATAC_61		chr4	187111738	187113707	SW_ATAC_61		chr1	3376694	3376924	SC_ATAC_61		chr1	3463879	3464457	HT_ATAC_61
		chr1	11538818	11539511	RT4_ATAC_62		chr2	128784611	128786283	SW_ATAC_62		chr1	3389711	3390462	SC_ATAC_62		chr1	3464705	3465327	HT_ATAC_62
		chr1	11865485	11866324	RT4_ATAC_63		chr5	156569246	156570964	SW_ATAC_63		chr1	3398478	3399339	SC_ATAC_63		chr1	3470042	3470294	HT_ATAC_63
		chr1	12039911	12040578	RT4_ATAC_64		chr5	89705028	89706074	SW_ATAC_64		chr1	3407877	3408078	SC_ATAC_64		chr1	3527525	3528675	HT_ATAC_64
		chr1	12079223	12079618	RT4_ATAC_65		chr5	32312304	32313881	SW_ATAC_65		chr1	3420779	3421865	SC_ATAC_65		chr1	3540638	3542363	HT_ATAC_65
		chr1	14075599	14076174	RT4_ATAC_66		chr16	46917655	46918917	SW_ATAC_66		chr1	3432662	3433290	SC_ATAC_66		chr1	3568727	3569868	HT_ATAC_66
		chr1	14127483	14128063	RT4_ATAC_67		chr2	676030	677854	SW_ATAC_67		chr1	3447380	3448400	SC_ATAC_67		chr1	3585201	3585708	HT_ATAC_67
		chr1	14516926	14517346	RT4_ATAC_68		chr3	131099744	131101459	SW_ATAC_68		chr1	3448485	3448607	SC_ATAC_68		chr1	3597200	3597904	HT_ATAC_68
		chr1	15744060	15744264	RT4_ATAC_69		chr8	73920420	73921792	SW_ATAC_69		chr1	3459265	3460240	SC_ATAC_69		chr1	3619163	3619520	HT_ATAC_69
		chr1	15850634	15851742	RT4_ATAC_70		chr1	185125374	185127117	SW_ATAC_70		chr1	3470020	3470337	SC_ATAC_70		chr1	3619689	3620636	HT_ATAC_70
		chr1	15943624	15944123	RT4_ATAC_71		chr3	136470267	136472300	SW_ATAC_71		chr1	3471530	3471656	SC_ATAC_71		chr1	3688966	3689879	HT_ATAC_71
		chr1	16162225	16162899	RT4_ATAC_72		chr5	162932217	162933348	SW_ATAC_72		chr1	3530044	3530237	SC_ATAC_72		chr1	3712330	3713355	HT_ATAC_72
		chr1	16173958	16174443	RT4_ATAC_73		chr3	119812681	119814758	SW_ATAC_73		chr1	3540886	3541797	SC_ATAC_73		chr1	3773142	3774361	HT_ATAC_73
		chr1	16469844	16470267	RT4_ATAC_74		chr5	33440177	33441841	SW_ATAC_74		chr1	3566377	3566790	SC_ATAC_74		chr1	3785859	3786926	HT_ATAC_74
		chr1	16470365	16470743	RT4_ATAC_75		chr7	77427239	77429125	SW_ATAC_75		chr1	3615367	3615968	SC_ATAC_75		chr1	3816603	3818098	HT_ATAC_75
		chr1	16494429	16494635	RT4_ATAC_76		chr20	42218790	42219995	SW_ATAC_76		chr1	3620059	3620218	SC_ATAC_76		chr1	3827449	3827648	HT_ATAC_76
		chr1	16499578	16500382	RT4_ATAC_77		chr5	43312881	43314052	SW_ATAC_77		chr1	3623986	3624365	SC_ATAC_77		chr1	4663375	4663804	HT_ATAC_77
		chr1	16543831	16544313	RT4_ATAC_78		chr5	7868330	7870132	SW_ATAC_78		chr1	3628498	3628999	SC_ATAC_78		chr1	5805970	5806291	HT_ATAC_78
		chr1	16693434	16694320	RT4_ATAC_79		chr8	87520123	87521219	SW_ATAC_79		chr1	3633557	3634534	SC_ATAC_79		chr1	5910301	5910500	HT_ATAC_79
		chr1	16940009	16940239	RT4_ATAC_80		chr9	69064993	69066005	SW_ATAC_80		chr1	3634630	3634838	SC_ATAC_80		chr1	6051469	6053321	HT_ATAC_80
		chr1	16940323	16940453	RT4_ATAC_81		chr13	96328358	96330419	SW_ATAC_81		chr1	3688803	3689961	SC_ATAC_81		chr1	6085288	6085783	HT_ATAC_81
		chr1	17231243	17231524	RT4_ATAC_82		chr3	93698469	93699807	SW_ATAC_82		chr1	3712579	3712883	SC_ATAC_82		chr1	6086000	6086517	HT_ATAC_82
		chr1	17380489	17380861	RT4_ATAC_83		chr5	5421586	5423263	SW_ATAC_83		chr1	3712976	3713256	SC_ATAC_83		chr1	6094578	6094754	HT_ATAC_83
		chr1	17846605	17846911	RT4_ATAC_84		chr8	107281993	107283842	SW_ATAC_84		chr1	3727924	3728177	SC_ATAC_84		chr1	6118740	6119355	HT_ATAC_84
		chr1	19228903	19229131	RT4_ATAC_85		chr2	166809797	166810882	SW_ATAC_85		chr1	3773163	3774503	SC_ATAC_85		chr1	6119892	6120251	HT_ATAC_85
		chr1	19229276	19229917	RT4_ATAC_86		chr14	36295251	36296401	SW_ATAC_86		chr1	3816585	3817736	SC_ATAC_86		chr1	6133679	6135182	HT_ATAC_86
		chr1	19638302	19639028	RT4_ATAC_87		chr13	76123225	76124841	SW_ATAC_87		chr1	3817827	3818096	SC_ATAC_87		chr1	6187681	6188346	HT_ATAC_87
		chr1	19811644	19812555	RT4_ATAC_88		chr14	39900677	39902673	SW_ATAC_88		chr1	3827439	3827816	SC_ATAC_88		chr1	6208196	6209146	HT_ATAC_88
		chr1	20987636	20988244	RT4_ATAC_89		chr16	74401279	74402925	SW_ATAC_89		chr1	4710167	4711008	SC_ATAC_89		chr1	6217251	6218407	HT_ATAC_89
		chr1	22109437	22109847	RT4_ATAC_90		chr3	136580229	136581969	SW_ATAC_90		chr1	5712151	5712772	SC_ATAC_90		chr1	6258998	6260133	HT_ATAC_90
		chr1	22283126	22284045	RT4_ATAC_91		chr2	197503934	197504991	SW_ATAC_91		chr1	5999310	5999737	SC_ATAC_91		chr1	6265058	6265695	HT_ATAC_91
		chr1	22351854	22352020	RT4_ATAC_92		chr13	98084971	98086394	SW_ATAC_92		chr1	6051841	6053018	SC_ATAC_92		chr1	6265861	6266778	HT_ATAC_92
		chr1	23670703	23671351	RT4_ATAC_93		chr4	166033312	166035056	SW_ATAC_93		chr1	6076158	6076897	SC_ATAC_93		chr1	6280181	6280674	HT_ATAC_93
		chr1	23694755	23695035	RT4_ATAC_94		chr1	170043180	170044160	SW_ATAC_94		chr1	6085245	6085796	SC_ATAC_94		chr1	6295068	6296278	HT_ATAC_94
		chr1	23778517	23778831	RT4_ATAC_95		chr12	39835919	39837647	SW_ATAC_95		chr1	6086024	6086741	SC_ATAC_95		chr1	6305187	6306262	HT_ATAC_95
		chr1	23810602	23811361	RT4_ATAC_96		chr1	249119751	249121248	SW_ATAC_96		chr1	6217325	6218415	SC_ATAC_96		chr1	6306856	6306954	HT_ATAC_96
		chr1	23881204	23881684	RT4_ATAC_97		chr3	81810063	81811101	SW_ATAC_97		chr1	6259009	6259931	SC_ATAC_97		chr1	6318763	6318974	HT_ATAC_97
		chr1	24126895	24127523	RT4_ATAC_98		chr7	86781156	86782949	SW_ATAC_98		chr1	6265108	6265740	SC_ATAC_98		chr1	6403448	6403771	HT_ATAC_98
		chr1	24285987	24286360	RT4_ATAC_99		chr11	82611198	82612897	SW_ATAC_99		chr1	6265843	6266726	SC_ATAC_99		chr1	6445556	6446702	HT_ATAC_99
		chr1	24306749	24307063	RT4_ATAC_100		chr1	65885367	65886783	SW_ATAC_100		chr1	6280114	6280687	SC_ATAC_100		chr1	6452986	6454209	HT_ATAC_100
		chr1	24740182	24740439	RT4_ATAC_101		chr5	93953431	93955115	SW_ATAC_101		chr1	6295625	6296278	SC_ATAC_101		chr1	6474304	6475220	HT_ATAC_101
		chr1	24741974	24742554	RT4_ATAC_102		chr7	112089983	112090611	SW_ATAC_102		chr1	6319902	6320448	SC_ATAC_102		chr1	6483608	6483986	HT_ATAC_102
		chr1	24828795	24829509	RT4_ATAC_103		chr2	62932142	62933806	SW_ATAC_103		chr1	6353896	6355372	SC_ATAC_103		chr1	6500238	6500973	HT_ATAC_103
		chr1	24969186	24969867	RT4_ATAC_104		chr3	149530248	149531994	SW_ATAC_104		chr1	6385397	6385472	SC_ATAC_104		chr1	6532070	6532353	HT_ATAC_104
		chr1	25071369	25072205	RT4_ATAC_105		chr8	64080488	64081831	SW_ATAC_105		chr1	6385561	6386216	SC_ATAC_105		chr1	6550028	6550211	HT_ATAC_105
		chr1	25566143	25566718	RT4_ATAC_106		chr3	143689703	143692248	SW_ATAC_106		chr1	6403397	6404159	SC_ATAC_106		chr1	6613674	6614917	HT_ATAC_106
		chr1	25664269	25664415	RT4_ATAC_107		chr7	53879054	53880234	SW_ATAC_107		chr1	6418128	6419400	SC_ATAC_107		chr1	6639730	6641085	HT_ATAC_107
		chr1	25664645	25665144	RT4_ATAC_108		chr8	86132095	86133185	SW_ATAC_108		chr1	6445453	6446216	SC_ATAC_108		chr1	6661033	6661579	HT_ATAC_108
		chr1	25756586	25757652	RT4_ATAC_109		chr11	85338378	85340299	SW_ATAC_109		chr1	6452996	6453664	SC_ATAC_109		chr1	6661813	6663719	HT_ATAC_109
		chr1	26231944	26232289	RT4_ATAC_110		chr3	135969015	135970153	SW_ATAC_110		chr1	6453750	6454229	SC_ATAC_110		chr1	6672705	6674070	HT_ATAC_110
		chr1	26361720	26362059	RT4_ATAC_111		chr7	144051996	144053152	SW_ATAC_111		chr1	6474274	6475813	SC_ATAC_111		chr1	6674269	6674886	HT_ATAC_111
		chr1	26362541	26362744	RT4_ATAC_112		chr13	60969968	60972059	SW_ATAC_112		chr1	6500236	6500963	SC_ATAC_112		chr1	6684826	6685886	HT_ATAC_112
		chr1	26438634	26438867	RT4_ATAC_113		chr14	65878386	65879993	SW_ATAC_113		chr1	6507490	6508669	SC_ATAC_113		chr1	6694776	6694960	HT_ATAC_113
		chr1	26496223	26496479	RT4_ATAC_114		chr1	243417628	243419724	SW_ATAC_114		chr1	6531572	6532477	SC_ATAC_114		chr1	6761317	6762287	HT_ATAC_114
		chr1	26560323	26560760	RT4_ATAC_115		chr3	87275703	87277148	SW_ATAC_115		chr1	6548781	6549758	SC_ATAC_115		chr1	6844296	6845558	HT_ATAC_115
		chr1	26826556	26826978	RT4_ATAC_116		chr3	131079934	131081293	SW_ATAC_116		chr1	6550015	6550199	SC_ATAC_116		chr1	7461867	7462533	HT_ATAC_116
		chr1	26827098	26827788	RT4_ATAC_117		chr3	97540090	97541654	SW_ATAC_117		chr1	6614125	6614419	SC_ATAC_117		chr1	7586262	7587631	HT_ATAC_117
		chr1	26857499	26858001	RT4_ATAC_118		chr5	108062997	108064747	SW_ATAC_118		chr1	6614505	6614755	SC_ATAC_118		chr1	7599821	7600050	HT_ATAC_118
		chr1	26946886	26947185	RT4_ATAC_119		chr5	159687386	159688821	SW_ATAC_119		chr1	6639562	6640336	SC_ATAC_119		chr1	7830908	7832061	HT_ATAC_119
		chr1	27191418	27191995	RT4_ATAC_120		chr1	212457986	212459760	SW_ATAC_120		chr1	6647349	6648703	SC_ATAC_120		chr1	7843280	7844699	HT_ATAC_120
		chr1	27816563	27816905	RT4_ATAC_121		chr1	186343539	186345333	SW_ATAC_121		chr1	6661211	6661751	SC_ATAC_121		chr1	8021188	8022254	HT_ATAC_121
		chr1	27817016	27817192	RT4_ATAC_122		chr5	102455083	102456862	SW_ATAC_122		chr1	6662528	6663445	SC_ATAC_122		chr1	8035367	8035789	HT_ATAC_122
		chr1	27894912	27895302	RT4_ATAC_123		chr14	45366158	45367346	SW_ATAC_123		chr1	6672816	6673890	SC_ATAC_123		chr1	8051880	8052530	HT_ATAC_123
		chr1	27951695	27952215	RT4_ATAC_124		chr5	6766481	6767261	SW_ATAC_124		chr1	6684807	6685929	SC_ATAC_124		chr1	8064783	8065630	HT_ATAC_124
		chr1	27998638	27999149	RT4_ATAC_125		chr8	79577612	79579163	SW_ATAC_125		chr1	6761784	6762104	SC_ATAC_125		chr1	8085557	8087026	HT_ATAC_125
		chr1	28052013	28052985	RT4_ATAC_126		chr11	86665878	86667676	SW_ATAC_126		chr1	6803448	6804220	SC_ATAC_126		chr1	8137396	8137575	HT_ATAC_126
		chr1	28099294	28100061	RT4_ATAC_127		chr1	169862336	169863601	SW_ATAC_127		chr1	6844498	6845570	SC_ATAC_127		chr1	8138242	8138526	HT_ATAC_127
		chr1	28157112	28157823	RT4_ATAC_128		chr16	48398995	48400709	SW_ATAC_128		chr1	6920141	6920351	SC_ATAC_128		chr1	8156654	8157144	HT_ATAC_128
		chr1	28240982	28241460	RT4_ATAC_129		chr4	149363113	149364521	SW_ATAC_129		chr1	7177479	7178424	SC_ATAC_129		chr1	8157409	8157755	HT_ATAC_129
		chr1	28261200	28261842	RT4_ATAC_130		chr6	101328390	101330031	SW_ATAC_130		chr1	7325798	7326444	SC_ATAC_130		chr1	8242131	8243141	HT_ATAC_130
		chr1	28286053	28286976	RT4_ATAC_131		chr1	241681922	241683394	SW_ATAC_131		chr1	7461865	7462514	SC_ATAC_131		chr1	8261326	8262931	HT_ATAC_131
		chr1	28414827	28415385	RT4_ATAC_132		chr20	29611132	29612654	SW_ATAC_132		chr1	7530835	7531645	SC_ATAC_132		chr1	8271837	8272554	HT_ATAC_132
		chr1	28562397	28562845	RT4_ATAC_133		chr5	81267453	81268466	SW_ATAC_133		chr1	7586346	7587278	SC_ATAC_133		chr1	8298497	8299464	HT_ATAC_133
		chr1	28573678	28573992	RT4_ATAC_134		chrX	3732419	3734662	SW_ATAC_134		chr1	7609351	7609685	SC_ATAC_134		chr1	8318891	8319955	HT_ATAC_134
		chr1	28585698	28586106	RT4_ATAC_135		chr20	52883655	52884996	SW_ATAC_135		chr1	7831170	7831923	SC_ATAC_135		chr1	8403137	8404141	HT_ATAC_135
		chr1	28586463	28586934	RT4_ATAC_136		chr8	104426539	104428088	SW_ATAC_136		chr1	7843517	7844444	SC_ATAC_136		chr1	8585363	8586278	HT_ATAC_136
		chr1	28695905	28696817	RT4_ATAC_137		chr1	193027612	193029337	SW_ATAC_137		chr1	8013844	8014669	SC_ATAC_137		chr1	8763079	8763796	HT_ATAC_137
		chr1	28764447	28764988	RT4_ATAC_138		chr11	124669212	124670855	SW_ATAC_138		chr1	8021179	8022049	SC_ATAC_138		chr1	8877556	8878283	HT_ATAC_138
		chr1	28832151	28832662	RT4_ATAC_139		chr1	172501256	172502992	SW_ATAC_139		chr1	8064726	8065614	SC_ATAC_139		chr1	8908877	8909211	HT_ATAC_139
		chr1	28844602	28845217	RT4_ATAC_140		chr5	154236953	154238517	SW_ATAC_140		chr1	8077581	8077916	SC_ATAC_140		chr1	8933760	8933955	HT_ATAC_140
		chr1	28879313	28879712	RT4_ATAC_141		chr1	244815902	244817376	SW_ATAC_141		chr1	8085856	8086732	SC_ATAC_141		chr1	8938005	8939555	HT_ATAC_141
		chr1	28907496	28908690	RT4_ATAC_142		chr8	107669637	107671034	SW_ATAC_142		chr1	8156750	8157012	SC_ATAC_142		chr1	8971217	8971859	HT_ATAC_142
		chr1	28974740	28974926	RT4_ATAC_143		chr8	90995533	90997085	SW_ATAC_143		chr1	8157347	8157846	SC_ATAC_143		chr1	9170683	9171092	HT_ATAC_143
		chr1	28975066	28975493	RT4_ATAC_144		chr13	22177597	22178539	SW_ATAC_144		chr1	8193799	8194489	SC_ATAC_144		chr1	9188236	9189955	HT_ATAC_144
		chr1	28975583	28975673	RT4_ATAC_145		chr12	77157328	77158876	SW_ATAC_145		chr1	8214755	8215127	SC_ATAC_145		chr1	9241439	9241803	HT_ATAC_145
		chr1	28995148	28995328	RT4_ATAC_146		chr3	120460869	120462106	SW_ATAC_146		chr1	8242124	8242865	SC_ATAC_146		chr1	9242054	9242670	HT_ATAC_146
		chr1	29063164	29063830	RT4_ATAC_147		chr6	70505991	70507364	SW_ATAC_147		chr1	8257825	8258250	SC_ATAC_147		chr1	9406001	9406407	HT_ATAC_147
		chr1	29213477	29213696	RT4_ATAC_148		chr2	58273429	58274916	SW_ATAC_148		chr1	8271623	8272557	SC_ATAC_148		chr1	9488701	9489631	HT_ATAC_148
		chr1	29240706	29241536	RT4_ATAC_149		chr1	171749909	171751555	SW_ATAC_149		chr1	8284920	8285481	SC_ATAC_149		chr1	9532992	9533638	HT_ATAC_149
		chr1	29508302	29508704	RT4_ATAC_150		chr7	12250062	12251485	SW_ATAC_150		chr1	8454832	8455315	SC_ATAC_150		chr1	9599217	9600481	HT_ATAC_150
		chr1	29529358	29529632	RT4_ATAC_151		chr3	101443124	101444337	SW_ATAC_151		chr1	8762905	8763842	SC_ATAC_151		chr1	9634803	9634919	HT_ATAC_151
		chr1	29557115	29557678	RT4_ATAC_152		chr7	87848993	87850087	SW_ATAC_152		chr1	8877664	8878297	SC_ATAC_152		chr1	9686913	9687516	HT_ATAC_152
		chr1	29565698	29566062	RT4_ATAC_153		chr6	52368181	52369594	SW_ATAC_153		chr1	8938691	8939610	SC_ATAC_153		chr1	9749036	9749769	HT_ATAC_153
		chr1	29876331	29877329	RT4_ATAC_154		chr5	128429789	128431526	SW_ATAC_154		chr1	8971428	8971841	SC_ATAC_154		chr1	9760378	9761029	HT_ATAC_154
		chr1	30457380	30458174	RT4_ATAC_155		chr1	97186708	97188413	SW_ATAC_155		chr1	9188841	9189969	SC_ATAC_155		chr1	9779031	9779430	HT_ATAC_155
		chr1	31190861	31191896	RT4_ATAC_156		chr5	82372517	82373981	SW_ATAC_156		chr1	9294269	9295205	SC_ATAC_156		chr1	9883705	9884783	HT_ATAC_156
		chr1	31296924	31297547	RT4_ATAC_157		chr2	88926214	88927885	SW_ATAC_157		chr1	9472982	9474105	SC_ATAC_157		chr1	9884932	9886041	HT_ATAC_157
		chr1	31538175	31538365	RT4_ATAC_158		chr1	85741543	85742786	SW_ATAC_158		chr1	9488759	9489247	SC_ATAC_158		chr1	9937997	9938769	HT_ATAC_158
		chr1	31538486	31539041	RT4_ATAC_159		chr5	118603679	118604007	SW_ATAC_159		chr1	9532943	9533599	SC_ATAC_159		chr1	9953115	9953595	HT_ATAC_159
		chr1	31627495	31627998	RT4_ATAC_160		chr4	128885630	128887311	SW_ATAC_160		chr1	9599240	9600474	SC_ATAC_160		chr1	9969719	9971290	HT_ATAC_160
		chr1	31643536	31644018	RT4_ATAC_161		chr11	82867251	82868535	SW_ATAC_161		chr1	9648436	9649139	SC_ATAC_161		chr1	10002512	10002689	HT_ATAC_161
		chr1	31769361	31770094	RT4_ATAC_162		chr3	33839650	33840766	SW_ATAC_162		chr1	9687158	9687489	SC_ATAC_162		chr1	10002894	10003674	HT_ATAC_162
		chr1	31862922	31863422	RT4_ATAC_163		chr2	136288021	136289745	SW_ATAC_163		chr1	9760415	9760864	SC_ATAC_163		chr1	10092586	10093880	HT_ATAC_163
		chr1	31885716	31886120	RT4_ATAC_164		chr5	108744724	108746543	SW_ATAC_164		chr1	9779222	9779467	SC_ATAC_164		chr1	10124053	10124265	HT_ATAC_164
		chr1	31895316	31895789	RT4_ATAC_165		chr1	193073628	193074939	SW_ATAC_165		chr1	9826753	9827354	SC_ATAC_165		chr1	10269845	10271265	HT_ATAC_165
		chr1	32014550	32015631	RT4_ATAC_166		chr12	100593069	100595032	SW_ATAC_166		chr1	9885153	9886033	SC_ATAC_166		chr1	10447623	10448394	HT_ATAC_166
		chr1	32041158	32042347	RT4_ATAC_167		chr5	153417554	153419045	SW_ATAC_167		chr1	9896213	9897047	SC_ATAC_167		chr1	10458447	10459989	HT_ATAC_167
		chr1	32109931	32110954	RT4_ATAC_168		chr11	94963244	94964862	SW_ATAC_168		chr1	9937840	9938513	SC_ATAC_168		chr1	10490175	10491140	HT_ATAC_168
		chr1	32254128	32254404	RT4_ATAC_169		chr12	82751612	82753189	SW_ATAC_169		chr1	9941850	9942773	SC_ATAC_169		chr1	10532110	10532889	HT_ATAC_169
		chr1	32254509	32255251	RT4_ATAC_170		chr2	91847273	91848318	SW_ATAC_170		chr1	9953151	9953625	SC_ATAC_170		chr1	10534858	10535643	HT_ATAC_170
		chr1	32264095	32264762	RT4_ATAC_171		chr5	34914842	34916251	SW_ATAC_171		chr1	9970086	9971256	SC_ATAC_171		chr1	10856355	10857031	HT_ATAC_171
		chr1	32363136	32363677	RT4_ATAC_172		chr1	75198126	75200004	SW_ATAC_172		chr1	10003012	10003601	SC_ATAC_172		chr1	10863974	10864857	HT_ATAC_172
		chr1	32403885	32404409	RT4_ATAC_173		chr2	48541240	48542925	SW_ATAC_173		chr1	10092465	10093881	SC_ATAC_173		chr1	10927248	10927631	HT_ATAC_173
		chr1	32421605	32422068	RT4_ATAC_174		chr14	67707279	67709016	SW_ATAC_174		chr1	10124039	10124280	SC_ATAC_174		chr1	10950275	10951142	HT_ATAC_174
		chr1	32429766	32429971	RT4_ATAC_175		chr3	160282675	160284196	SW_ATAC_175		chr1	10269868	10270974	SC_ATAC_175		chr1	10959971	10960592	HT_ATAC_175
		chr1	32478853	32479553	RT4_ATAC_176		chr7	86848199	86850113	SW_ATAC_176		chr1	10458503	10459759	SC_ATAC_176		chr1	10960740	10961901	HT_ATAC_176
		chr1	32538136	32539145	RT4_ATAC_177		chr1	159750324	159751437	SW_ATAC_177		chr1	10490339	10491237	SC_ATAC_177		chr1	11072260	11073436	HT_ATAC_177
		chr1	32573478	32574483	RT4_ATAC_178		chr5	126365241	126367031	SW_ATAC_178		chr1	10532149	10532754	SC_ATAC_178		chr1	11119662	11120761	HT_ATAC_178
		chr1	32645108	32645805	RT4_ATAC_179		chr7	108209567	108211164	SW_ATAC_179		chr1	10534863	10535499	SC_ATAC_179		chr1	11159344	11160213	HT_ATAC_179
		chr1	32671021	32671322	RT4_ATAC_180		chr1	241802792	241804150	SW_ATAC_180		chr1	10556060	10556548	SC_ATAC_180		chr1	11322256	11323041	HT_ATAC_180
		chr1	32687556	32688078	RT4_ATAC_181		chr1	170500503	170501857	SW_ATAC_181		chr1	10588470	10588734	SC_ATAC_181		chr1	11332877	11333840	HT_ATAC_181
		chr1	32757334	32757977	RT4_ATAC_182		chr14	66974074	66975950	SW_ATAC_182		chr1	10695211	10696323	SC_ATAC_182		chr1	11538837	11539474	HT_ATAC_182
		chr1	32816954	32817667	RT4_ATAC_183		chr1	169074822	169076449	SW_ATAC_183		chr1	10839334	10839560	SC_ATAC_183		chr1	11714170	11715190	HT_ATAC_183
		chr1	32859762	32860798	RT4_ATAC_184		chr1	76189673	76190905	SW_ATAC_184		chr1	10856142	10857041	SC_ATAC_184		chr1	11723971	11724750	HT_ATAC_184
		chr1	32930305	32931117	RT4_ATAC_185		chr7	38217327	38218612	SW_ATAC_185		chr1	10863969	10864894	SC_ATAC_185		chr1	11740410	11741771	HT_ATAC_185
		chr1	32952821	32953105	RT4_ATAC_186		chr13	48611473	48612538	SW_ATAC_186		chr1	10884822	10885303	SC_ATAC_186		chr1	11795850	11796717	HT_ATAC_186
		chr1	33077564	33078048	RT4_ATAC_187		chr1	242010920	242012234	SW_ATAC_187		chr1	10959991	10960641	SC_ATAC_187		chr1	11845210	11845488	HT_ATAC_187
		chr1	33115875	33116309	RT4_ATAC_188		chr5	41903606	41904764	SW_ATAC_188		chr1	10960771	10961345	SC_ATAC_188		chr1	11865349	11866557	HT_ATAC_188
		chr1	33116502	33117340	RT4_ATAC_189		chr14	53018395	53020356	SW_ATAC_189		chr1	11072279	11072791	SC_ATAC_189		chr1	11958960	11959536	HT_ATAC_189
		chr1	33182251	33182566	RT4_ATAC_190		chr7	39662528	39664337	SW_ATAC_190		chr1	11072874	11073225	SC_ATAC_190		chr1	11967815	11967996	HT_ATAC_190
		chr1	33190728	33191189	RT4_ATAC_191		chr5	153824328	153826619	SW_ATAC_191		chr1	11120001	11120570	SC_ATAC_191		chr1	11968168	11969283	HT_ATAC_191
		chr1	33219336	33219642	RT4_ATAC_192		chr21	32930470	32932446	SW_ATAC_192		chr1	11159358	11160058	SC_ATAC_192		chr1	11994346	11995239	HT_ATAC_192
		chr1	33225678	33226208	RT4_ATAC_193		chr5	6632640	6634392	SW_ATAC_193		chr1	11322369	11323010	SC_ATAC_193		chr1	12039783	12040922	HT_ATAC_193
		chr1	33226492	33226759	RT4_ATAC_194		chr1	216773823	216774990	SW_ATAC_194		chr1	11332897	11333981	SC_ATAC_194		chr1	12062052	12062571	HT_ATAC_194
		chr1	33282850	33283935	RT4_ATAC_195		chr5	61699163	61700548	SW_ATAC_195		chr1	11538652	11539407	SC_ATAC_195		chr1	12079080	12079839	HT_ATAC_195
		chr1	33366702	33367175	RT4_ATAC_196		chr3	113414610	113415918	SW_ATAC_196		chr1	11713158	11713811	SC_ATAC_196		chr1	12221724	12222518	HT_ATAC_196
		chr1	33430092	33430683	RT4_ATAC_197		chr8	63950904	63952172	SW_ATAC_197		chr1	11714722	11715171	SC_ATAC_197		chr1	12289719	12290383	HT_ATAC_197
		chr1	33458062	33458744	RT4_ATAC_198		chr8	77911708	77913235	SW_ATAC_198		chr1	11724002	11724515	SC_ATAC_198		chr1	12290649	12291472	HT_ATAC_198
		chr1	33502004	33502778	RT4_ATAC_199		chr19	32895817	32897538	SW_ATAC_199		chr1	11740972	11741945	SC_ATAC_199		chr1	12655943	12656705	HT_ATAC_199
		chr1	33546387	33546825	RT4_ATAC_200		chr7	143533240	143534721	SW_ATAC_200		chr1	11795990	11796246	SC_ATAC_200		chr1	12677998	12678568	HT_ATAC_200
		chr1	33592755	33593260	RT4_ATAC_201		chr6	80815873	80816998	SW_ATAC_201		chr1	11796368	11796717	SC_ATAC_201		chr1	12679094	12679297	HT_ATAC_201
		chr1	33647023	33647393	RT4_ATAC_202		chr14	77786590	77787899	SW_ATAC_202		chr1	11865480	11866571	SC_ATAC_202		chr1	12679902	12680122	HT_ATAC_202
		chr1	33684362	33684552	RT4_ATAC_203		chr1	107598972	107600442	SW_ATAC_203		chr1	11967826	11968007	SC_ATAC_203		chr1	12719038	12719302	HT_ATAC_203
		chr1	33686656	33687099	RT4_ATAC_204		chr3	172467942	172469263	SW_ATAC_204		chr1	11968168	11969181	SC_ATAC_204		chr1	12775693	12776220	HT_ATAC_204
		chr1	33720890	33721355	RT4_ATAC_205		chr3	28389266	28391364	SW_ATAC_205		chr1	11994173	11995046	SC_ATAC_205		chr1	14075611	14076536	HT_ATAC_205
		chr1	33815435	33816115	RT4_ATAC_206		chr3	33481493	33483019	SW_ATAC_206		chr1	12039669	12040761	SC_ATAC_206		chr1	14085518	14085889	HT_ATAC_206
		chr1	33896286	33897070	RT4_ATAC_207		chr9	74525065	74527060	SW_ATAC_207		chr1	12041779	12042080	SC_ATAC_207		chr1	14127367	14128072	HT_ATAC_207
		chr1	33936205	33936349	RT4_ATAC_208		chr9	102860447	102862209	SW_ATAC_208		chr1	12079245	12079919	SC_ATAC_208		chr1	15058270	15059125	HT_ATAC_208
		chr1	33937922	33938314	RT4_ATAC_209		chr2	24306640	24308062	SW_ATAC_209		chr1	12112016	12112582	SC_ATAC_209		chr1	15237491	15238407	HT_ATAC_209
		chr1	33977844	33978522	RT4_ATAC_210		chr19	28283728	28285723	SW_ATAC_210		chr1	12192994	12193331	SC_ATAC_210		chr1	15426975	15427120	HT_ATAC_210
		chr1	34004636	34005187	RT4_ATAC_211		chr1	48937307	48938249	SW_ATAC_211		chr1	12203435	12204460	SC_ATAC_211		chr1	15455083	15455301	HT_ATAC_211
		chr1	35220458	35221185	RT4_ATAC_212		chr5	118787946	118789228	SW_ATAC_212		chr1	12221750	12222387	SC_ATAC_212		chr1	15466267	15467048	HT_ATAC_212
		chr1	35229209	35229478	RT4_ATAC_213		chr1	71545903	71547184	SW_ATAC_213		chr1	12289927	12290480	SC_ATAC_213		chr1	15478868	15479812	HT_ATAC_213
		chr1	35246616	35246854	RT4_ATAC_214		chr20	26189712	26190408	SW_ATAC_214		chr1	12292352	12292576	SC_ATAC_214		chr1	15480030	15480845	HT_ATAC_214
		chr1	35318116	35318989	RT4_ATAC_215		chr8	118532279	118533830	SW_ATAC_215		chr1	12497029	12497375	SC_ATAC_215		chr1	15573562	15574404	HT_ATAC_215
		chr1	35324895	35325559	RT4_ATAC_216		chr14	81407400	81408752	SW_ATAC_216		chr1	12537902	12538958	SC_ATAC_216		chr1	15598931	15599538	HT_ATAC_216
		chr1	35497030	35497735	RT4_ATAC_217		chr12	100660128	100661959	SW_ATAC_217		chr1	12540853	12541450	SC_ATAC_217		chr1	15735873	15737206	HT_ATAC_217
		chr1	35544505	35545356	RT4_ATAC_218		chr19	33165529	33167588	SW_ATAC_218		chr1	12609577	12610231	SC_ATAC_218		chr1	15757236	15757894	HT_ATAC_218
		chr1	35657539	35657848	RT4_ATAC_219		chr7	86973839	86975745	SW_ATAC_219		chr1	12633792	12634622	SC_ATAC_219		chr1	15850588	15851923	HT_ATAC_219
		chr1	35658461	35659349	RT4_ATAC_220		chr11	94226391	94227695	SW_ATAC_220		chr1	12648178	12648761	SC_ATAC_220		chr1	15852923	15853790	HT_ATAC_220
		chr1	35734115	35734460	RT4_ATAC_221		chr13	95253613	95254950	SW_ATAC_221		chr1	12655020	12656660	SC_ATAC_221		chr1	15929445	15930480	HT_ATAC_221
		chr1	35971469	35971955	RT4_ATAC_222		chr7	111845755	111847498	SW_ATAC_222		chr1	12664135	12664676	SC_ATAC_222		chr1	15943624	15944763	HT_ATAC_222
		chr1	36022925	36023474	RT4_ATAC_223		chr8	117778048	117779339	SW_ATAC_223		chr1	12678294	12679644	SC_ATAC_223		chr1	16006708	16006935	HT_ATAC_223
		chr1	36107051	36107818	RT4_ATAC_224		chr3	37033833	37035391	SW_ATAC_224		chr1	13910141	13911225	SC_ATAC_224		chr1	16007263	16008503	HT_ATAC_224
		chr1	36234810	36235927	RT4_ATAC_225		chr5	109024423	109026606	SW_ATAC_225		chr1	13931600	13932050	SC_ATAC_225		chr1	16125582	16125834	HT_ATAC_225
		chr1	36348580	36348884	RT4_ATAC_226		chr7	90032402	90033765	SW_ATAC_226		chr1	14075588	14076499	SC_ATAC_226		chr1	16126006	16127867	HT_ATAC_226
		chr1	36396233	36397211	RT4_ATAC_227		chr2	127822055	127823114	SW_ATAC_227		chr1	14093359	14093920	SC_ATAC_227		chr1	16160839	16162876	HT_ATAC_227
		chr1	36554307	36554961	RT4_ATAC_228		chr5	122758113	122759864	SW_ATAC_228		chr1	14125263	14125645	SC_ATAC_228		chr1	16173530	16175189	HT_ATAC_228
		chr1	36600372	36600895	RT4_ATAC_229		chr5	94890101	94891324	SW_ATAC_229		chr1	14127460	14128080	SC_ATAC_229		chr1	16301900	16302733	HT_ATAC_229
		chr1	36614673	36615486	RT4_ATAC_230		chr7	35733719	35735363	SW_ATAC_230		chr1	14463780	14464538	SC_ATAC_230		chr1	16320799	16321230	HT_ATAC_230
		chr1	36616304	36616697	RT4_ATAC_231		chr7	55432918	55434360	SW_ATAC_231		chr1	14464638	14465193	SC_ATAC_231		chr1	16382645	16383107	HT_ATAC_231
		chr1	36621391	36621538	RT4_ATAC_232		chr5	130506280	130507503	SW_ATAC_232		chr1	14516903	14517538	SC_ATAC_232		chr1	16469963	16470637	HT_ATAC_232
		chr1	36621634	36621810	RT4_ATAC_233		chr12	104322800	104324368	SW_ATAC_233		chr1	15058470	15058772	SC_ATAC_233		chr1	16471586	16472346	HT_ATAC_233
		chr1	36653628	36654122	RT4_ATAC_234		chr11	95522547	95524433	SW_ATAC_234		chr1	15059300	15059870	SC_ATAC_234		chr1	16481543	16481801	HT_ATAC_234
		chr1	36689597	36690346	RT4_ATAC_235		chr8	57123736	57125032	SW_ATAC_235		chr1	15059957	15060287	SC_ATAC_235		chr1	16493913	16494609	HT_ATAC_235
		chr1	36690438	36690657	RT4_ATAC_236		chr12	99037875	99039800	SW_ATAC_236		chr1	15068648	15069132	SC_ATAC_236		chr1	16499656	16500427	HT_ATAC_236
		chr1	36765582	36765959	RT4_ATAC_237		chr1	249166865	249168904	SW_ATAC_237		chr1	15237690	15238244	SC_ATAC_237		chr1	16508125	16508789	HT_ATAC_237
		chr1	36839454	36839668	RT4_ATAC_238		chr12	100535488	100537093	SW_ATAC_238		chr1	15250464	15250672	SC_ATAC_238		chr1	16510921	16511683	HT_ATAC_238
		chr1	36840077	36840552	RT4_ATAC_239		chr5	162886568	162888108	SW_ATAC_239		chr1	15273183	15273967	SC_ATAC_239		chr1	16532746	16533764	HT_ATAC_239
		chr1	36851408	36851868	RT4_ATAC_240		chr5	96142959	96144305	SW_ATAC_240		chr1	15346554	15346789	SC_ATAC_240		chr1	16543484	16544383	HT_ATAC_240
		chr1	36852095	36852533	RT4_ATAC_241		chr1	184723251	184725137	SW_ATAC_241		chr1	15416868	15417336	SC_ATAC_241		chr1	16562642	16563347	HT_ATAC_241
		chr1	36862801	36863708	RT4_ATAC_242		chr21	19190718	19192678	SW_ATAC_242		chr1	15478905	15479104	SC_ATAC_242		chr1	16563575	16563886	HT_ATAC_242
		chr1	36886480	36886878	RT4_ATAC_243		chr7	66092989	66094452	SW_ATAC_243		chr1	15479190	15480776	SC_ATAC_243		chr1	16678475	16679365	HT_ATAC_243
		chr1	36915938	36916529	RT4_ATAC_244		chr8	90913935	90915370	SW_ATAC_244		chr1	15505358	15505969	SC_ATAC_244		chr1	16693434	16694544	HT_ATAC_244
		chr1	36929904	36930142	RT4_ATAC_245		chr3	111793502	111794458	SW_ATAC_245		chr1	15526859	15527701	SC_ATAC_245		chr1	16766840	16767998	HT_ATAC_245
		chr1	37979506	37980915	RT4_ATAC_246		chr12	30906884	30908412	SW_ATAC_246		chr1	15610044	15610299	SC_ATAC_246		chr1	16825139	16825908	HT_ATAC_246
		chr1	38061249	38061935	RT4_ATAC_247		chr2	105653856	105655132	SW_ATAC_247		chr1	15656573	15656954	SC_ATAC_247		chr1	16826062	16826253	HT_ATAC_247
		chr1	38156133	38156455	RT4_ATAC_248		chr2	36557614	36558687	SW_ATAC_248		chr1	15663676	15664435	SC_ATAC_248		chr1	16939603	16940336	HT_ATAC_248
		chr1	38157663	38158432	RT4_ATAC_249		chr7	64540967	64542203	SW_ATAC_249		chr1	15727175	15727717	SC_ATAC_249		chr1	16951538	16951659	HT_ATAC_249
		chr1	38273778	38274022	RT4_ATAC_250		chr8	109455073	109456655	SW_ATAC_250		chr1	15735897	15736480	SC_ATAC_250		chr1	16970148	16971842	HT_ATAC_250
		chr1	38274102	38274509	RT4_ATAC_251		chr14	50778203	50779833	SW_ATAC_251		chr1	15743860	15743963	SC_ATAC_251		chr1	17230390	17230850	HT_ATAC_251
		chr1	38324989	38325742	RT4_ATAC_252		chr11	125461492	125463388	SW_ATAC_252		chr1	15744054	15744461	SC_ATAC_252		chr1	17231115	17232319	HT_ATAC_252
		chr1	38397132	38397710	RT4_ATAC_253		chr3	101567745	101569037	SW_ATAC_253		chr1	15789670	15790241	SC_ATAC_253		chr1	17240040	17241249	HT_ATAC_253
		chr1	38455056	38456039	RT4_ATAC_254		chr10	131908560	131910046	SW_ATAC_254		chr1	15850587	15851886	SC_ATAC_254		chr1	17252014	17252484	HT_ATAC_254
		chr1	38478060	38478910	RT4_ATAC_255		chr7	56118844	56120001	SW_ATAC_255		chr1	15852961	15853758	SC_ATAC_255		chr1	17274715	17275314	HT_ATAC_255
		chr1	38512417	38513449	RT4_ATAC_256		chr5	43483399	43484863	SW_ATAC_256		chr1	15943609	15944327	SC_ATAC_256		chr1	17338173	17338825	HT_ATAC_256
		chr1	39324817	39325854	RT4_ATAC_257		chr2	187453905	187455976	SW_ATAC_257		chr1	16007246	16007435	SC_ATAC_257		chr1	17380296	17381032	HT_ATAC_257
		chr1	39338391	39339360	RT4_ATAC_258		chr3	100119227	100120908	SW_ATAC_258		chr1	16067945	16068301	SC_ATAC_258		chr1	17445740	17446086	HT_ATAC_258
		chr1	39406856	39407679	RT4_ATAC_259		chr6	122930852	122932563	SW_ATAC_259		chr1	16084986	16085353	SC_ATAC_259		chr1	17516494	17517192	HT_ATAC_259
		chr1	39416808	39417036	RT4_ATAC_260		chr2	190648196	190649722	SW_ATAC_260		chr1	16092333	16092582	SC_ATAC_260		chr1	17541140	17541781	HT_ATAC_260
		chr1	39456485	39457311	RT4_ATAC_261		chr2	131099202	131101025	SW_ATAC_261		chr1	16126422	16127274	SC_ATAC_261		chr1	17542039	17542396	HT_ATAC_261
		chr1	39570804	39571491	RT4_ATAC_262		chr20	18268515	18269932	SW_ATAC_262		chr1	16160838	16161771	SC_ATAC_262		chr1	17559680	17560644	HT_ATAC_262
		chr1	39649438	39649990	RT4_ATAC_263		chr16	53536262	53537929	SW_ATAC_263		chr1	16161911	16162667	SC_ATAC_263		chr1	17577007	17577585	HT_ATAC_263
		chr1	39657833	39658434	RT4_ATAC_264		chr7	82791251	82792820	SW_ATAC_264		chr1	16173929	16174378	SC_ATAC_264		chr1	17613767	17614546	HT_ATAC_264
		chr1	39864200	39864709	RT4_ATAC_265		chr7	66767039	66768418	SW_ATAC_265		chr1	16212661	16213103	SC_ATAC_265		chr1	17738640	17739200	HT_ATAC_265
		chr1	39874075	39874951	RT4_ATAC_266		chr7	121783042	121784750	SW_ATAC_266		chr1	16276037	16276672	SC_ATAC_266		chr1	17786476	17787551	HT_ATAC_266
		chr1	40156793	40157450	RT4_ATAC_267		chr1	247094327	247095907	SW_ATAC_267		chr1	16279260	16279569	SC_ATAC_267		chr1	17802333	17803023	HT_ATAC_267
		chr1	40254224	40254319	RT4_ATAC_268		chr5	114879548	114881011	SW_ATAC_268		chr1	16302322	16302698	SC_ATAC_268		chr1	17846451	17846881	HT_ATAC_268
		chr1	40311233	40311601	RT4_ATAC_269		chr5	86707740	86709355	SW_ATAC_269		chr1	16469914	16470697	SC_ATAC_269		chr1	17880382	17880979	HT_ATAC_269
		chr1	40317774	40318519	RT4_ATAC_270		chr7	36191963	36193504	SW_ATAC_270		chr1	16482499	16482755	SC_ATAC_270		chr1	17895762	17896831	HT_ATAC_270
		chr1	40367061	40368172	RT4_ATAC_271		chr3	101497668	101498780	SW_ATAC_271		chr1	16485433	16485975	SC_ATAC_271		chr1	18008150	18008433	HT_ATAC_271
		chr1	40400121	40400645	RT4_ATAC_272		chr4	120133148	120134719	SW_ATAC_272		chr1	16494194	16494585	SC_ATAC_272		chr1	19146909	19146982	HT_ATAC_272
		chr1	40454257	40455078	RT4_ATAC_273		chr6	122720066	122721471	SW_ATAC_273		chr1	16499660	16500442	SC_ATAC_273		chr1	19147316	19147678	HT_ATAC_273
		chr1	40480637	40481165	RT4_ATAC_274		chr3	4533860	4535440	SW_ATAC_274		chr1	16508421	16508703	SC_ATAC_274		chr1	19228917	19229971	HT_ATAC_274
		chr1	40505563	40506481	RT4_ATAC_275		chr1	244210932	244212356	SW_ATAC_275		chr1	16510890	16511410	SC_ATAC_275		chr1	19282895	19284001	HT_ATAC_275
		chr1	40626843	40627155	RT4_ATAC_276		chr14	89290368	89291700	SW_ATAC_276		chr1	16532800	16533814	SC_ATAC_276		chr1	19291804	19292582	HT_ATAC_276
		chr1	40723333	40724326	RT4_ATAC_277		chr8	74205761	74207441	SW_ATAC_277		chr1	16543587	16544218	SC_ATAC_277		chr1	19324697	19325158	HT_ATAC_277
		chr1	40839170	40839489	RT4_ATAC_278		chr1	108741816	108743717	SW_ATAC_278		chr1	16562744	16563345	SC_ATAC_278		chr1	19337394	19337925	HT_ATAC_278
		chr1	40915572	40916421	RT4_ATAC_279		chr16	58662780	58664598	SW_ATAC_279		chr1	16563435	16563847	SC_ATAC_279		chr1	19355767	19356215	HT_ATAC_279
		chr1	40974033	40974716	RT4_ATAC_280		chr2	133103847	133105344	SW_ATAC_280		chr1	16678475	16679386	SC_ATAC_280		chr1	19535760	19537123	HT_ATAC_280
		chr1	40997109	40997529	RT4_ATAC_281		chr5	43555969	43557915	SW_ATAC_281		chr1	16693431	16694579	SC_ATAC_281		chr1	19577966	19578976	HT_ATAC_281
		chr1	41157111	41158461	RT4_ATAC_282		chr13	103248517	103250220	SW_ATAC_282		chr1	16723003	16723400	SC_ATAC_282		chr1	19637798	19639395	HT_ATAC_282
		chr1	41174507	41174684	RT4_ATAC_283		chr1	249152008	249153616	SW_ATAC_283		chr1	16825295	16825885	SC_ATAC_283		chr1	19811416	19812663	HT_ATAC_283
		chr1	41174796	41175025	RT4_ATAC_284		chr12	21653899	21655381	SW_ATAC_284		chr1	16939666	16940501	SC_ATAC_284		chr1	19922891	19924030	HT_ATAC_284
		chr1	41327926	41328662	RT4_ATAC_285		chr5	139780208	139782478	SW_ATAC_285		chr1	16949936	16951113	SC_ATAC_285		chr1	20126098	20126713	HT_ATAC_285
		chr1	41365002	41365542	RT4_ATAC_286		chr7	12442719	12444320	SW_ATAC_286		chr1	16970780	16971689	SC_ATAC_286		chr1	20208647	20209602	HT_ATAC_286
		chr1	41445244	41445789	RT4_ATAC_287		chr5	16465114	16466841	SW_ATAC_287		chr1	17033998	17034571	SC_ATAC_287		chr1	20229978	20230567	HT_ATAC_287
		chr1	41575013	41575536	RT4_ATAC_288		chr2	20251098	20252015	SW_ATAC_288		chr1	17036354	17036524	SC_ATAC_288		chr1	20301419	20302093	HT_ATAC_288
		chr1	41826613	41827187	RT4_ATAC_289		chr15	98503219	98504832	SW_ATAC_289		chr1	17107534	17108141	SC_ATAC_289		chr1	20478786	20479274	HT_ATAC_289
		chr1	41884568	41885338	RT4_ATAC_290		chr6	64281570	64282540	SW_ATAC_290		chr1	17231050	17231525	SC_ATAC_290		chr1	20512283	20512732	HT_ATAC_290
		chr1	41949833	41950478	RT4_ATAC_291		chr7	64125805	64127112	SW_ATAC_291		chr1	17231634	17232001	SC_ATAC_291		chr1	20512930	20513151	HT_ATAC_291
		chr1	42268598	42269399	RT4_ATAC_292		chr7	77325140	77326951	SW_ATAC_292		chr1	17240049	17241075	SC_ATAC_292		chr1	20537611	20539356	HT_ATAC_292
		chr1	42317376	42317587	RT4_ATAC_293		chr11	86747904	86749533	SW_ATAC_293		chr1	17255791	17256509	SC_ATAC_293		chr1	20539511	20539739	HT_ATAC_293
		chr1	42500870	42501865	RT4_ATAC_294		chr1	98385936	98387191	SW_ATAC_294		chr1	17274680	17275476	SC_ATAC_294		chr1	20802582	20803224	HT_ATAC_294
		chr1	42631227	42631929	RT4_ATAC_295		chr2	18740903	18742269	SW_ATAC_295		chr1	17275560	17275784	SC_ATAC_295		chr1	20812039	20813765	HT_ATAC_295
		chr1	42671832	42672215	RT4_ATAC_296		chr4	113152420	113153753	SW_ATAC_296		chr1	17330402	17330875	SC_ATAC_296		chr1	20834240	20834905	HT_ATAC_296
		chr1	42800383	42801344	RT4_ATAC_297		chr1	101360165	101362511	SW_ATAC_297		chr1	17338171	17338820	SC_ATAC_297		chr1	20857326	20858117	HT_ATAC_297
		chr1	42846323	42846796	RT4_ATAC_298		chr7	90892800	90894843	SW_ATAC_298		chr1	17380280	17381032	SC_ATAC_298		chr1	20939946	20940698	HT_ATAC_298
		chr1	42921895	42922705	RT4_ATAC_299		chr17	12920637	12921932	SW_ATAC_299		chr1	17386243	17386398	SC_ATAC_299		chr1	20959806	20960703	HT_ATAC_299
		chr1	42928556	42929445	RT4_ATAC_300		chr2	190305454	190306688	SW_ATAC_300		chr1	17516458	17516918	SC_ATAC_300		chr1	20987541	20988468	HT_ATAC_300
		chr1	43123629	43124528	RT4_ATAC_301		chr5	96158654	96160198	SW_ATAC_301		chr1	17552891	17553230	SC_ATAC_301		chr1	21023012	21023648	HT_ATAC_301
		chr1	43147412	43148126	RT4_ATAC_302		chr5	95997546	95999196	SW_ATAC_302		chr1	17559630	17560700	SC_ATAC_302		chr1	21044015	21044839	HT_ATAC_302
		chr1	43232587	43233416	RT4_ATAC_303		chr3	180629774	180631375	SW_ATAC_303		chr1	17613898	17614378	SC_ATAC_303		chr1	21058701	21060059	HT_ATAC_303
		chr1	43282303	43283183	RT4_ATAC_304		chr14	45430768	45432589	SW_ATAC_304		chr1	17616162	17616560	SC_ATAC_304		chr1	21112541	21114257	HT_ATAC_304
		chr1	43312001	43312371	RT4_ATAC_305		chr2	132439246	132440869	SW_ATAC_305		chr1	17767874	17768428	SC_ATAC_305		chr1	21348722	21349359	HT_ATAC_305
		chr1	43402950	43403209	RT4_ATAC_306		chr7	120590447	120591567	SW_ATAC_306		chr1	17786617	17787438	SC_ATAC_306		chr1	21503080	21503758	HT_ATAC_306
		chr1	43424288	43424943	RT4_ATAC_307		chr1	176175417	176177006	SW_ATAC_307		chr1	17846364	17846982	SC_ATAC_307		chr1	21616428	21617003	HT_ATAC_307
		chr1	43432812	43433064	RT4_ATAC_308		chr3	158389505	158390886	SW_ATAC_308		chr1	17880504	17880935	SC_ATAC_308		chr1	21650872	21651452	HT_ATAC_308
		chr1	43478300	43478571	RT4_ATAC_309		chr1	70819166	70820824	SW_ATAC_309		chr1	17895693	17896713	SC_ATAC_309		chr1	21671656	21672382	HT_ATAC_309
		chr1	43637685	43638471	RT4_ATAC_310		chr11	101785394	101786300	SW_ATAC_310		chr1	17914190	17915260	SC_ATAC_310		chr1	21934029	21934672	HT_ATAC_310
		chr1	43736053	43736608	RT4_ATAC_311		chr7	13959549	13960379	SW_ATAC_311		chr1	18995101	18995779	SC_ATAC_311		chr1	21953289	21953862	HT_ATAC_311
		chr1	43751202	43751623	RT4_ATAC_312		chr5	87436539	87437691	SW_ATAC_312		chr1	19212594	19212832	SC_ATAC_312		chr1	22109015	22110285	HT_ATAC_312
		chr1	43814474	43815305	RT4_ATAC_313		chr3	118958905	118960083	SW_ATAC_313		chr1	19228842	19229129	SC_ATAC_313		chr1	22257477	22258286	HT_ATAC_313
		chr1	43824316	43824881	RT4_ATAC_314		chr3	155587848	155589650	SW_ATAC_314		chr1	19229237	19229559	SC_ATAC_314		chr1	22263673	22264234	HT_ATAC_314
		chr1	43831960	43832149	RT4_ATAC_315		chr1	193090673	193092020	SW_ATAC_315		chr1	19252822	19253470	SC_ATAC_315		chr1	22283212	22284032	HT_ATAC_315
		chr1	43832271	43832351	RT4_ATAC_316		chr3	27524644	27526573	SW_ATAC_316		chr1	19253630	19254160	SC_ATAC_316		chr1	22351582	22352829	HT_ATAC_316
		chr1	43833019	43833975	RT4_ATAC_317		chr6	116421561	116422770	SW_ATAC_317		chr1	19283087	19283603	SC_ATAC_317		chr1	22378981	22380255	HT_ATAC_317
		chr1	43855104	43855851	RT4_ATAC_318		chr18	61637130	61638444	SW_ATAC_318		chr1	19336133	19336759	SC_ATAC_318		chr1	22498503	22499263	HT_ATAC_318
		chr1	44015651	44016483	RT4_ATAC_319		chr2	84685689	84687376	SW_ATAC_319		chr1	19337541	19337934	SC_ATAC_319		chr1	22601737	22602641	HT_ATAC_319
		chr1	44023303	44023792	RT4_ATAC_320		chr8	56986145	56987653	SW_ATAC_320		chr1	19360429	19361116	SC_ATAC_320		chr1	22739109	22739354	HT_ATAC_320
		chr1	44047920	44048257	RT4_ATAC_321		chr1	249199948	249201473	SW_ATAC_321		chr1	19400830	19401911	SC_ATAC_321		chr1	22778205	22779109	HT_ATAC_321
		chr1	44115463	44116354	RT4_ATAC_322		chr3	130611807	130613803	SW_ATAC_322		chr1	19536463	19537136	SC_ATAC_322		chr1	23158357	23158841	HT_ATAC_322
		chr1	44172994	44173259	RT4_ATAC_323		chr2	183943026	183944428	SW_ATAC_323		chr1	19577950	19578119	SC_ATAC_323		chr1	23345724	23346884	HT_ATAC_323
		chr1	44323979	44324447	RT4_ATAC_324		chr4	156297418	156298773	SW_ATAC_324		chr1	19578202	19578342	SC_ATAC_324		chr1	23495268	23495500	HT_ATAC_324
		chr1	44350701	44351452	RT4_ATAC_325		chr7	135193722	135195485	SW_ATAC_325		chr1	19638053	19639405	SC_ATAC_325		chr1	23543322	23544373	HT_ATAC_325
		chr1	44411897	44412885	RT4_ATAC_326		chr8	52810887	52812775	SW_ATAC_326		chr1	19687700	19688098	SC_ATAC_326		chr1	23670111	23671289	HT_ATAC_326
		chr1	44435405	44435734	RT4_ATAC_327		chr5	12574026	12575669	SW_ATAC_327		chr1	19766964	19767278	SC_ATAC_327		chr1	23694517	23695060	HT_ATAC_327
		chr1	44440180	44441048	RT4_ATAC_328		chr6	116892016	116893049	SW_ATAC_328		chr1	19811404	19811548	SC_ATAC_328		chr1	23695298	23695749	HT_ATAC_328
		chr1	44456866	44457742	RT4_ATAC_329		chr11	134093634	134095770	SW_ATAC_329		chr1	19811637	19812616	SC_ATAC_329		chr1	23810333	23811326	HT_ATAC_329
		chr1	44495626	44496327	RT4_ATAC_330		chr1	247373444	247374441	SW_ATAC_330		chr1	19922914	19924040	SC_ATAC_330		chr1	23854748	23855168	HT_ATAC_330
		chr1	44793389	44794060	RT4_ATAC_331		chr6	163148123	163149553	SW_ATAC_331		chr1	20208678	20209523	SC_ATAC_331		chr1	23880981	23881743	HT_ATAC_331
		chr1	44820670	44821177	RT4_ATAC_332		chr6	117803413	117805077	SW_ATAC_332		chr1	20251783	20252272	SC_ATAC_332		chr1	23882413	23882851	HT_ATAC_332
		chr1	44997648	44998049	RT4_ATAC_333		chr5	10441166	10442588	SW_ATAC_333		chr1	20538019	20538483	SC_ATAC_333		chr1	23885688	23886329	HT_ATAC_333
		chr1	45097803	45098211	RT4_ATAC_334		chr17	53044923	53046786	SW_ATAC_334		chr1	20606002	20606417	SC_ATAC_334		chr1	23888877	23889129	HT_ATAC_334
		chr1	45139736	45140475	RT4_ATAC_335		chr13	76111507	76112705	SW_ATAC_335		chr1	20682377	20683033	SC_ATAC_335		chr1	23911917	23912659	HT_ATAC_335
		chr1	45196236	45197204	RT4_ATAC_336		chr4	166248397	166249320	SW_ATAC_336		chr1	20770487	20771052	SC_ATAC_336		chr1	23920111	23920525	HT_ATAC_336
		chr1	45205252	45205578	RT4_ATAC_337		chr9	106855888	106857293	SW_ATAC_337		chr1	20812637	20812926	SC_ATAC_337		chr1	24018041	24018857	HT_ATAC_337
		chr1	45240651	45241359	RT4_ATAC_338		chr5	107716682	107718705	SW_ATAC_338		chr1	20822618	20823093	SC_ATAC_338		chr1	24069309	24070663	HT_ATAC_338
		chr1	45265420	45266249	RT4_ATAC_339		chr5	166721496	166722938	SW_ATAC_339		chr1	20915184	20916441	SC_ATAC_339		chr1	24104476	24105251	HT_ATAC_339
		chr1	45272986	45273655	RT4_ATAC_340		chr3	25824302	25825582	SW_ATAC_340		chr1	20940370	20940713	SC_ATAC_340		chr1	24125996	24126757	HT_ATAC_340
		chr1	45451995	45452543	RT4_ATAC_341		chr6	80246172	80247879	SW_ATAC_341		chr1	20987750	20988610	SC_ATAC_341		chr1	24126907	24127522	HT_ATAC_341
		chr1	45476953	45477127	RT4_ATAC_342		chr4	147442051	147444276	SW_ATAC_342		chr1	21022854	21023819	SC_ATAC_342		chr1	24152544	24152629	HT_ATAC_342
		chr1	45769159	45769881	RT4_ATAC_343		chr14	53196441	53197687	SW_ATAC_343		chr1	21058591	21059431	SC_ATAC_343		chr1	24194179	24195188	HT_ATAC_343
		chr1	45805310	45806237	RT4_ATAC_344		chr11	100646781	100648300	SW_ATAC_344		chr1	21059514	21059864	SC_ATAC_344		chr1	24285492	24286331	HT_ATAC_344
		chr1	45956380	45957355	RT4_ATAC_345		chr12	76477534	76479179	SW_ATAC_345		chr1	21112852	21114076	SC_ATAC_345		chr1	24306233	24307169	HT_ATAC_345
		chr1	45965551	45966229	RT4_ATAC_346		chr3	101394939	101396887	SW_ATAC_346		chr1	21348717	21349029	SC_ATAC_346		chr1	24373716	24373895	HT_ATAC_346
		chr1	45986862	45987829	RT4_ATAC_347		chr8	103250751	103252093	SW_ATAC_347		chr1	21503314	21503892	SC_ATAC_347		chr1	24592912	24593929	HT_ATAC_347
		chr1	46016331	46016812	RT4_ATAC_348		chr9	66457184	66458885	SW_ATAC_348		chr1	21588049	21588671	SC_ATAC_348		chr1	24645721	24646400	HT_ATAC_348
		chr1	46049032	46050785	RT4_ATAC_349		chr3	139107763	139109572	SW_ATAC_349		chr1	21650831	21651607	SC_ATAC_349		chr1	24741755	24742848	HT_ATAC_349
		chr1	46152129	46152442	RT4_ATAC_350		chr14	20810662	20812266	SW_ATAC_350		chr1	21660638	21661448	SC_ATAC_350		chr1	24743507	24743779	HT_ATAC_350
		chr1	46152566	46153045	RT4_ATAC_351		chr4	120987277	120988736	SW_ATAC_351		chr1	21671610	21672206	SC_ATAC_351		chr1	24790434	24791200	HT_ATAC_351
		chr1	46215833	46216780	RT4_ATAC_352		chr7	36429052	36430173	SW_ATAC_352		chr1	21849885	21850303	SC_ATAC_352		chr1	24828750	24829835	HT_ATAC_352
		chr1	46268479	46268856	RT4_ATAC_353		chr3	172427682	172429558	SW_ATAC_353		chr1	21933929	21934646	SC_ATAC_353		chr1	24842128	24842413	HT_ATAC_353
		chr1	46269064	46269364	RT4_ATAC_354		chr9	77566510	77568363	SW_ATAC_354		chr1	21940846	21941487	SC_ATAC_354		chr1	24968707	24970195	HT_ATAC_354
		chr1	46269472	46269681	RT4_ATAC_355		chr9	82185887	82186972	SW_ATAC_355		chr1	21953106	21953918	SC_ATAC_355		chr1	25028985	25029601	HT_ATAC_355
		chr1	46598099	46598436	RT4_ATAC_356		chr10	38299172	38300475	SW_ATAC_356		chr1	22109270	22109878	SC_ATAC_356		chr1	25071369	25072544	HT_ATAC_356
		chr1	46598578	46599143	RT4_ATAC_357		chr13	103450858	103452406	SW_ATAC_357		chr1	22110023	22110303	SC_ATAC_357		chr1	25174362	25175427	HT_ATAC_357
		chr1	46645276	46645460	RT4_ATAC_358		chr4	178362975	178363806	SW_ATAC_358		chr1	22196215	22196673	SC_ATAC_358		chr1	25558416	25559464	HT_ATAC_358
		chr1	46648833	46649587	RT4_ATAC_359		chr5	89824364	89826174	SW_ATAC_359		chr1	22282926	22284089	SC_ATAC_359		chr1	25566142	25566900	HT_ATAC_359
		chr1	46684212	46684551	RT4_ATAC_360		chr7	127291353	127292712	SW_ATAC_360		chr1	22345564	22345973	SC_ATAC_360		chr1	25573095	25574560	HT_ATAC_360
		chr1	46712603	46713482	RT4_ATAC_361		chr12	77458867	77460028	SW_ATAC_361		chr1	22351447	22352081	SC_ATAC_361		chr1	25593302	25594100	HT_ATAC_361
		chr1	46768307	46769096	RT4_ATAC_362		chr6	82461391	82463909	SW_ATAC_362		chr1	22352278	22352572	SC_ATAC_362		chr1	25664092	25664446	HT_ATAC_362
		chr1	46769199	46769442	RT4_ATAC_363		chr6	79943197	79943858	SW_ATAC_363		chr1	22352671	22352744	SC_ATAC_363		chr1	25664629	25665417	HT_ATAC_363
		chr1	46806220	46806870	RT4_ATAC_364		chr2	135675124	135677119	SW_ATAC_364		chr1	22378990	22379346	SC_ATAC_364		chr1	25756405	25757824	HT_ATAC_364
		chr1	46813826	46814070	RT4_ATAC_365		chr6	52859904	52861217	SW_ATAC_365		chr1	22498501	22499252	SC_ATAC_365		chr1	25869931	25870740	HT_ATAC_365
		chr1	46859870	46860557	RT4_ATAC_366		chr8	62626493	62627591	SW_ATAC_366		chr1	22565542	22566380	SC_ATAC_366		chr1	26146165	26147427	HT_ATAC_366
		chr1	46982373	46983231	RT4_ATAC_367		chr4	47486760	47488073	SW_ATAC_367		chr1	22601751	22602061	SC_ATAC_367		chr1	26184949	26186096	HT_ATAC_367
		chr1	46986097	46986465	RT4_ATAC_368		chr7	16684268	16686679	SW_ATAC_368		chr1	22778177	22778916	SC_ATAC_368		chr1	26201441	26202705	HT_ATAC_368
		chr1	46989586	46989891	RT4_ATAC_369		chr7	10979203	10980904	SW_ATAC_369		chr1	23065990	23066486	SC_ATAC_369		chr1	26218736	26219258	HT_ATAC_369
		chr1	46996520	46996899	RT4_ATAC_370		chr4	190861287	190862747	SW_ATAC_370		chr1	23076877	23077461	SC_ATAC_370		chr1	26231931	26233286	HT_ATAC_370
		chr1	47069569	47070198	RT4_ATAC_371		chr7	91762846	91764709	SW_ATAC_371		chr1	23158316	23158856	SC_ATAC_371		chr1	26323768	26325303	HT_ATAC_371
		chr1	47082074	47082701	RT4_ATAC_372		chr14	50086862	50088525	SW_ATAC_372		chr1	23345702	23346375	SC_ATAC_372		chr1	26361703	26362718	HT_ATAC_372
		chr1	47184550	47185134	RT4_ATAC_373		chr6	119255543	119256700	SW_ATAC_373		chr1	23495234	23495545	SC_ATAC_373		chr1	26437343	26439124	HT_ATAC_373
		chr1	47185425	47185778	RT4_ATAC_374		chr5	110074160	110075338	SW_ATAC_374		chr1	23514960	23515797	SC_ATAC_374		chr1	26496111	26497162	HT_ATAC_374
		chr1	47222911	47224045	RT4_ATAC_375		chr12	22777655	22779229	SW_ATAC_375		chr1	23523200	23523784	SC_ATAC_375		chr1	26503621	26504237	HT_ATAC_375
		chr1	47269828	47270555	RT4_ATAC_376		chr15	55699746	55701125	SW_ATAC_376		chr1	23670252	23671480	SC_ATAC_376		chr1	26560151	26561362	HT_ATAC_376
		chr1	47644789	47645480	RT4_ATAC_377		chr20	13975641	13977187	SW_ATAC_377		chr1	23694453	23695071	SC_ATAC_377		chr1	26606177	26606804	HT_ATAC_377
		chr1	47779239	47780249	RT4_ATAC_378		chr3	98311538	98312914	SW_ATAC_378		chr1	23695303	23695832	SC_ATAC_378		chr1	26632601	26633704	HT_ATAC_378
		chr1	47799084	47799674	RT4_ATAC_379		chr12	62653139	62654991	SW_ATAC_379		chr1	23703762	23704309	SC_ATAC_379		chr1	26678026	26678325	HT_ATAC_379
		chr1	47799806	47800026	RT4_ATAC_380		chr7	7679602	7681246	SW_ATAC_380		chr1	23730162	23730880	SC_ATAC_380		chr1	26680583	26681020	HT_ATAC_380
		chr1	47854510	47854717	RT4_ATAC_381		chr11	108092699	108094144	SW_ATAC_381		chr1	23778471	23778802	SC_ATAC_381		chr1	26758204	26759469	HT_ATAC_381
		chr1	47902860	47903861	RT4_ATAC_382		chr6	117922838	117924311	SW_ATAC_382		chr1	23810492	23811320	SC_ATAC_382		chr1	26798025	26799777	HT_ATAC_382
		chr1	47943314	47944380	RT4_ATAC_383		chr2	63277120	63278702	SW_ATAC_383		chr1	23854771	23855202	SC_ATAC_383		chr1	26826552	26828196	HT_ATAC_383
		chr1	48035408	48036010	RT4_ATAC_384		chr20	37376542	37377652	SW_ATAC_384		chr1	23881291	23881799	SC_ATAC_384		chr1	26856115	26857066	HT_ATAC_384
		chr1	48115955	48116340	RT4_ATAC_385		chr1	169454368	169456107	SW_ATAC_385		chr1	23888858	23889114	SC_ATAC_385		chr1	26946616	26948092	HT_ATAC_385
		chr1	48559446	48559857	RT4_ATAC_386		chr15	94773964	94775255	SW_ATAC_386		chr1	23912111	23912447	SC_ATAC_386		chr1	27003896	27004330	HT_ATAC_386
		chr1	48760423	48760662	RT4_ATAC_387		chr12	96612884	96614283	SW_ATAC_387		chr1	23919178	23919877	SC_ATAC_387		chr1	27021934	27022573	HT_ATAC_387
		chr1	48937345	48938339	RT4_ATAC_388		chr5	36150830	36152942	SW_ATAC_388		chr1	23919971	23920363	SC_ATAC_388		chr1	27113797	27114995	HT_ATAC_388
		chr1	48959874	48960502	RT4_ATAC_389		chr5	156873162	156874924	SW_ATAC_389		chr1	24018110	24018365	SC_ATAC_389		chr1	27179673	27180194	HT_ATAC_389
		chr1	48963860	48964034	RT4_ATAC_390		chr7	144532070	144533569	SW_ATAC_390		chr1	24018485	24018827	SC_ATAC_390		chr1	27189318	27189741	HT_ATAC_390
		chr1	48964265	48964413	RT4_ATAC_391		chr3	160472179	160474146	SW_ATAC_391		chr1	24069672	24070028	SC_ATAC_391		chr1	27191487	27192024	HT_ATAC_391
		chr1	49153939	49154297	RT4_ATAC_392		chr3	97482864	97484323	SW_ATAC_392		chr1	24104464	24104591	SC_ATAC_392		chr1	27247752	27249401	HT_ATAC_392
		chr1	49159447	49160061	RT4_ATAC_393		chr3	4344853	4345930	SW_ATAC_393		chr1	24104688	24105298	SC_ATAC_393		chr1	27286139	27287318	HT_ATAC_393
		chr1	49184183	49184963	RT4_ATAC_394		chr5	156692762	156693916	SW_ATAC_394		chr1	24117258	24117907	SC_ATAC_394		chr1	27320406	27320880	HT_ATAC_394
		chr1	49242258	49243387	RT4_ATAC_395		chr4	139935460	139937577	SW_ATAC_395		chr1	24118053	24118516	SC_ATAC_395		chr1	27338893	27339834	HT_ATAC_395
		chr1	49250074	49250207	RT4_ATAC_396		chr12	98986494	98988487	SW_ATAC_396		chr1	24125940	24126762	SC_ATAC_396		chr1	27438520	27439060	HT_ATAC_396
		chr1	49276391	49276515	RT4_ATAC_397		chr1	213030909	213032453	SW_ATAC_397		chr1	24127185	24127512	SC_ATAC_397		chr1	27468222	27468748	HT_ATAC_397
		chr1	49344217	49344657	RT4_ATAC_398		chr7	55200316	55201803	SW_ATAC_398		chr1	24194557	24195010	SC_ATAC_398		chr1	27469042	27469269	HT_ATAC_398
		chr1	49799598	49799999	RT4_ATAC_399		chr7	137686159	137687280	SW_ATAC_399		chr1	24285552	24286713	SC_ATAC_399		chr1	27481153	27482263	HT_ATAC_399
		chr1	49812464	49812928	RT4_ATAC_400		chr8	75262229	75263212	SW_ATAC_400		chr1	24306435	24307073	SC_ATAC_400		chr1	27492759	27493295	HT_ATAC_400
		chr1	49817519	49817965	RT4_ATAC_401		chr4	13485238	13486856	SW_ATAC_401		chr1	24345321	24345640	SC_ATAC_401		chr1	27518591	27519130	HT_ATAC_401
		chr1	49920692	49920921	RT4_ATAC_402		chr21	27106512	27108317	SW_ATAC_402		chr1	24446646	24447294	SC_ATAC_402		chr1	27560460	27561645	HT_ATAC_402
		chr1	50798701	50798953	RT4_ATAC_403		chr1	64808821	64810202	SW_ATAC_403		chr1	24469145	24469883	SC_ATAC_403		chr1	27648422	27649155	HT_ATAC_403
		chr1	50799040	50799490	RT4_ATAC_404		chr1	109805651	109806668	SW_ATAC_404		chr1	24476414	24476539	SC_ATAC_404		chr1	27668048	27669152	HT_ATAC_404
		chr1	50940469	50941034	RT4_ATAC_405		chr1	78444322	78445347	SW_ATAC_405		chr1	24477024	24477356	SC_ATAC_405		chr1	27669428	27670059	HT_ATAC_405
		chr1	51068784	51069771	RT4_ATAC_406		chr1	95698838	95700400	SW_ATAC_406		chr1	24513502	24513947	SC_ATAC_406		chr1	27691853	27693567	HT_ATAC_406
		chr1	51425213	51426478	RT4_ATAC_407		chr2	133173391	133174697	SW_ATAC_407		chr1	24620833	24621772	SC_ATAC_407		chr1	27709412	27710005	HT_ATAC_407
		chr1	51433764	51434009	RT4_ATAC_408		chr3	190231253	190232110	SW_ATAC_408		chr1	24648739	24649285	SC_ATAC_408		chr1	27718778	27719666	HT_ATAC_408
		chr1	51434128	51434428	RT4_ATAC_409		chr14	78082012	78083527	SW_ATAC_409		chr1	24691022	24692010	SC_ATAC_409		chr1	27816070	27817344	HT_ATAC_409
		chr1	51443625	51444109	RT4_ATAC_410		chr5	114961198	114962361	SW_ATAC_410		chr1	24740161	24740422	SC_ATAC_410		chr1	27854259	27855402	HT_ATAC_410
		chr1	51498455	51498914	RT4_ATAC_411		chr8	87526436	87527589	SW_ATAC_411		chr1	24741793	24742359	SC_ATAC_411		chr1	27866421	27867371	HT_ATAC_411
		chr1	51701606	51702605	RT4_ATAC_412		chr15	49102411	49103704	SW_ATAC_412		chr1	24828629	24829094	SC_ATAC_412		chr1	27868894	27869668	HT_ATAC_412
		chr1	51779632	51780443	RT4_ATAC_413		chr3	93781095	93782277	SW_ATAC_413		chr1	24829200	24829697	SC_ATAC_413		chr1	27883340	27884916	HT_ATAC_413
		chr1	51796907	51797330	RT4_ATAC_414		chr2	176032033	176033582	SW_ATAC_414		chr1	24969048	24970193	SC_ATAC_414		chr1	27894908	27895669	HT_ATAC_414
		chr1	51983599	51985244	RT4_ATAC_415		chr18	34408122	34409892	SW_ATAC_415		chr1	25031603	25032457	SC_ATAC_415		chr1	27901402	27902732	HT_ATAC_415
		chr1	52035502	52035934	RT4_ATAC_416		chr16	50775305	50776342	SW_ATAC_416		chr1	25071321	25072298	SC_ATAC_416		chr1	27929583	27930803	HT_ATAC_416
		chr1	52082602	52083473	RT4_ATAC_417		chr5	168005839	168007029	SW_ATAC_417		chr1	25174493	25175298	SC_ATAC_417		chr1	27985442	27985685	HT_ATAC_417
		chr1	52194884	52195904	RT4_ATAC_418		chr13	50017592	50019006	SW_ATAC_418		chr1	25348890	25349765	SC_ATAC_418		chr1	27985848	27986755	HT_ATAC_418
		chr1	52344009	52344749	RT4_ATAC_419		chr1	68961291	68963304	SW_ATAC_419		chr1	25520870	25521517	SC_ATAC_419		chr1	27998350	27999325	HT_ATAC_419
		chr1	52498770	52499566	RT4_ATAC_420		chr6	80713462	80714944	SW_ATAC_420		chr1	25565972	25566733	SC_ATAC_420		chr1	28051853	28053070	HT_ATAC_420
		chr1	52520763	52521250	RT4_ATAC_421		chr2	211340923	211341793	SW_ATAC_421		chr1	25573533	25573692	SC_ATAC_421		chr1	28099290	28100249	HT_ATAC_421
		chr1	52521740	52522017	RT4_ATAC_422		chr20	52739759	52740691	SW_ATAC_422		chr1	25573883	25574549	SC_ATAC_422		chr1	28157028	28157965	HT_ATAC_422
		chr1	52522112	52522408	RT4_ATAC_423		chr20	30160282	30161502	SW_ATAC_423		chr1	25593951	25594187	SC_ATAC_423		chr1	28184313	28185149	HT_ATAC_423
		chr1	52607568	52608455	RT4_ATAC_424		chrX	24072275	24073383	SW_ATAC_424		chr1	25594304	25594568	SC_ATAC_424		chr1	28240585	28241702	HT_ATAC_424
		chr1	52831604	52832284	RT4_ATAC_425		chr2	183901957	183903836	SW_ATAC_425		chr1	25664296	25664436	SC_ATAC_425		chr1	28285892	28287015	HT_ATAC_425
		chr1	52869830	52870376	RT4_ATAC_426		chr16	75497289	75498931	SW_ATAC_426		chr1	25664635	25665165	SC_ATAC_426		chr1	28293364	28293552	HT_ATAC_426
		chr1	53018250	53018827	RT4_ATAC_427		chr1	179923122	179924730	SW_ATAC_427		chr1	25756596	25757037	SC_ATAC_427		chr1	28414277	28415616	HT_ATAC_427
		chr1	53018922	53019371	RT4_ATAC_428		chr5	95296495	95298168	SW_ATAC_428		chr1	25757131	25757407	SC_ATAC_428		chr1	28520121	28520652	HT_ATAC_428
		chr1	53163545	53164372	RT4_ATAC_429		chr14	88851232	88852501	SW_ATAC_429		chr1	25883055	25883726	SC_ATAC_429		chr1	28562205	28562816	HT_ATAC_429
		chr1	53168653	53169407	RT4_ATAC_430		chr3	99978993	99980556	SW_ATAC_430		chr1	25894798	25895708	SC_ATAC_430		chr1	28573437	28574025	HT_ATAC_430
		chr1	53326340	53326485	RT4_ATAC_431		chr7	87256821	87258578	SW_ATAC_431		chr1	26145928	26146933	SC_ATAC_431		chr1	28575577	28575783	HT_ATAC_431
		chr1	53386985	53387593	RT4_ATAC_432		chr20	40246611	40247923	SW_ATAC_432		chr1	26185127	26186123	SC_ATAC_432		chr1	28585601	28587334	HT_ATAC_432
		chr1	53392651	53393084	RT4_ATAC_433		chr2	198363598	198365517	SW_ATAC_433		chr1	26201455	26202534	SC_ATAC_433		chr1	28640375	28641265	HT_ATAC_433
		chr1	53611549	53612570	RT4_ATAC_434		chr8	66629019	66630680	SW_ATAC_434		chr1	26231939	26232380	SC_ATAC_434		chr1	28655333	28655861	HT_ATAC_434
		chr1	53662289	53662890	RT4_ATAC_435		chr5	64063804	64065229	SW_ATAC_435		chr1	26232854	26233124	SC_ATAC_435		chr1	28695930	28697147	HT_ATAC_435
		chr1	53685817	53686625	RT4_ATAC_436		chr6	163812974	163813984	SW_ATAC_436		chr1	26324209	26324897	SC_ATAC_436		chr1	28763954	28764989	HT_ATAC_436
		chr1	53703912	53704450	RT4_ATAC_437		chr12	102513396	102515057	SW_ATAC_437		chr1	26361881	26362077	SC_ATAC_437		chr1	28832280	28832613	HT_ATAC_437
		chr1	53791684	53792131	RT4_ATAC_438		chr5	31531126	31533421	SW_ATAC_438		chr1	26362186	26362439	SC_ATAC_438		chr1	28837165	28837667	HT_ATAC_438
		chr1	53792249	53792988	RT4_ATAC_439		chr20	35806490	35808126	SW_ATAC_439		chr1	26362527	26362727	SC_ATAC_439		chr1	28844227	28845222	HT_ATAC_439
		chr1	54204744	54205303	RT4_ATAC_440		chr14	58764196	58766304	SW_ATAC_440		chr1	26437355	26437681	SC_ATAC_440		chr1	28879133	28880511	HT_ATAC_440
		chr1	54303701	54304445	RT4_ATAC_441		chr8	134309225	134310710	SW_ATAC_441		chr1	26437765	26438867	SC_ATAC_441		chr1	28907836	28908818	HT_ATAC_441
		chr1	54355228	54355674	RT4_ATAC_442		chr6	52148959	52150300	SW_ATAC_442		chr1	26452919	26453400	SC_ATAC_442		chr1	28968884	28970162	HT_ATAC_442
		chr1	54411172	54412063	RT4_ATAC_443		chr2	48667266	48668848	SW_ATAC_443		chr1	26496117	26497225	SC_ATAC_443		chr1	28974585	28975809	HT_ATAC_443
		chr1	54518797	54519493	RT4_ATAC_444		chr6	155634801	155636378	SW_ATAC_444		chr1	26503733	26504055	SC_ATAC_444		chr1	28994707	28996157	HT_ATAC_444
		chr1	54547369	54547584	RT4_ATAC_445		chr2	54949766	54951326	SW_ATAC_445		chr1	26560159	26561237	SC_ATAC_445		chr1	29062864	29064527	HT_ATAC_445
		chr1	54665393	54666149	RT4_ATAC_446		chr2	64067490	64069112	SW_ATAC_446		chr1	26604857	26605196	SC_ATAC_446		chr1	29101554	29102107	HT_ATAC_446
		chr1	54872027	54872277	RT4_ATAC_447		chr7	65215380	65216554	SW_ATAC_447		chr1	26606373	26606674	SC_ATAC_447		chr1	29213277	29213811	HT_ATAC_447
		chr1	54953791	54954427	RT4_ATAC_448		chr4	53578100	53579272	SW_ATAC_448		chr1	26633046	26633538	SC_ATAC_448		chr1	29240523	29241987	HT_ATAC_448
		chr1	54955106	54955344	RT4_ATAC_449		chr2	196932841	196933985	SW_ATAC_449		chr1	26662680	26663394	SC_ATAC_449		chr1	29292128	29292502	HT_ATAC_449
		chr1	55007692	55008590	RT4_ATAC_450		chr1	212659145	212660020	SW_ATAC_450		chr1	26680381	26681007	SC_ATAC_450		chr1	29507587	29508730	HT_ATAC_450
		chr1	55029799	55030670	RT4_ATAC_451		chr7	148724960	148726360	SW_ATAC_451		chr1	26704482	26705271	SC_ATAC_451		chr1	29529368	29529849	HT_ATAC_451
		chr1	55081170	55081785	RT4_ATAC_452		chr3	141456672	141458219	SW_ATAC_452		chr1	26758404	26759143	SC_ATAC_452		chr1	29554003	29554405	HT_ATAC_452
		chr1	55181361	55181902	RT4_ATAC_453		chr5	64919484	64921096	SW_ATAC_453		chr1	26798451	26798989	SC_ATAC_453		chr1	29557054	29557638	HT_ATAC_453
		chr1	55229865	55230773	RT4_ATAC_454		chr8	25315709	25317046	SW_ATAC_454		chr1	26799093	26799745	SC_ATAC_454		chr1	29562870	29563182	HT_ATAC_454
		chr1	55266825	55267366	RT4_ATAC_455		chr5	87564188	87565609	SW_ATAC_455		chr1	26826750	26827936	SC_ATAC_455		chr1	29565559	29566247	HT_ATAC_455
		chr1	55352440	55353315	RT4_ATAC_456		chr7	56173688	56174660	SW_ATAC_456		chr1	26856145	26856299	SC_ATAC_456		chr1	30042900	30043158	HT_ATAC_456
		chr1	55436683	55436900	RT4_ATAC_457		chr14	24583114	24584714	SW_ATAC_457		chr1	26856418	26857235	SC_ATAC_457		chr1	31157808	31158703	HT_ATAC_457
		chr1	55437019	55437438	RT4_ATAC_458		chr7	39988567	39990937	SW_ATAC_458		chr1	26857509	26858035	SC_ATAC_458		chr1	31181030	31181202	HT_ATAC_458
		chr1	55487686	55488034	RT4_ATAC_459		chr2	101178995	101180088	SW_ATAC_459		chr1	26946594	26947212	SC_ATAC_459		chr1	31190861	31192503	HT_ATAC_459
		chr1	55680932	55681566	RT4_ATAC_460		chr12	31226030	31227727	SW_ATAC_460		chr1	26947310	26948151	SC_ATAC_460		chr1	31210320	31211565	HT_ATAC_460
		chr1	55894604	55895483	RT4_ATAC_461		chr8	67578573	67580135	SW_ATAC_461		chr1	27021823	27022294	SC_ATAC_461		chr1	31255671	31255983	HT_ATAC_461
		chr1	56343152	56343495	RT4_ATAC_462		chr12	104234296	104236051	SW_ATAC_462		chr1	27097924	27098513	SC_ATAC_462		chr1	31296928	31297860	HT_ATAC_462
		chr1	56352843	56353307	RT4_ATAC_463		chr2	23786518	23788076	SW_ATAC_463		chr1	27113874	27114768	SC_ATAC_463		chr1	31538210	31539033	HT_ATAC_463
		chr1	56382210	56382638	RT4_ATAC_464		chrX	20159190	20160446	SW_ATAC_464		chr1	27175505	27176282	SC_ATAC_464		chr1	31627495	31628598	HT_ATAC_464
		chr1	56880309	56880818	RT4_ATAC_465		chr4	122617074	122618759	SW_ATAC_465		chr1	27189298	27189872	SC_ATAC_465		chr1	31643590	31644126	HT_ATAC_465
		chr1	56897937	56898593	RT4_ATAC_466		chr10	35930279	35931833	SW_ATAC_466		chr1	27191469	27192036	SC_ATAC_466		chr1	31655008	31655559	HT_ATAC_466
		chr1	56982612	56982887	RT4_ATAC_467		chr2	204103051	204104852	SW_ATAC_467		chr1	27216295	27216900	SC_ATAC_467		chr1	31769157	31770799	HT_ATAC_467
		chr1	57044982	57045217	RT4_ATAC_468		chr5	112256550	112258231	SW_ATAC_468		chr1	27286428	27287100	SC_ATAC_468		chr1	31862921	31863438	HT_ATAC_468
		chr1	57093167	57093740	RT4_ATAC_469		chr1	210770939	210772104	SW_ATAC_469		chr1	27325452	27325689	SC_ATAC_469		chr1	31867346	31868042	HT_ATAC_469
		chr1	57110340	57111586	RT4_ATAC_470		chr4	186346292	186347714	SW_ATAC_470		chr1	27339121	27339640	SC_ATAC_470		chr1	31886327	31886677	HT_ATAC_470
		chr1	57154200	57154419	RT4_ATAC_471		chr4	89513000	89514689	SW_ATAC_471		chr1	27357733	27358453	SC_ATAC_471		chr1	31976697	31977691	HT_ATAC_471
		chr1	57220486	57221080	RT4_ATAC_472		chr5	14581409	14582666	SW_ATAC_472		chr1	27438295	27439118	SC_ATAC_472		chr1	32014274	32015384	HT_ATAC_472
		chr1	57284537	57285208	RT4_ATAC_473		chr4	130014244	130015174	SW_ATAC_473		chr1	27481145	27481798	SC_ATAC_473		chr1	32027891	32028035	HT_ATAC_473
		chr1	58056684	58056918	RT4_ATAC_474		chr1	143913059	143914401	SW_ATAC_474		chr1	27481894	27482157	SC_ATAC_474		chr1	32028690	32028971	HT_ATAC_474
		chr1	58824070	58824444	RT4_ATAC_475		chr10	38644872	38646032	SW_ATAC_475		chr1	27560722	27561825	SC_ATAC_475		chr1	32029573	32030084	HT_ATAC_475
		chr1	59011616	59012649	RT4_ATAC_476		chr11	124980902	124982127	SW_ATAC_476		chr1	27648337	27649195	SC_ATAC_476		chr1	32040643	32041724	HT_ATAC_476
		chr1	59041767	59043239	RT4_ATAC_477		chr11	122932126	122933847	SW_ATAC_477		chr1	27668354	27668603	SC_ATAC_477		chr1	32041888	32042267	HT_ATAC_477
		chr1	59058273	59058658	RT4_ATAC_478		chr2	20850165	20851510	SW_ATAC_478		chr1	27669418	27670289	SC_ATAC_478		chr1	32047429	32047707	HT_ATAC_478
		chr1	59083983	59084326	RT4_ATAC_479		chr6	71122597	71124171	SW_ATAC_479		chr1	27691999	27693189	SC_ATAC_479		chr1	32109963	32111247	HT_ATAC_479
		chr1	59085918	59086274	RT4_ATAC_480		chr2	198668933	198670197	SW_ATAC_480		chr1	27693367	27693608	SC_ATAC_480		chr1	32221035	32221272	HT_ATAC_480
		chr1	59165255	59165952	RT4_ATAC_481		chr3	67048342	67049544	SW_ATAC_481		chr1	27718628	27719347	SC_ATAC_481		chr1	32253705	32254377	HT_ATAC_481
		chr1	59248796	59250143	RT4_ATAC_482		chr3	179064640	179066388	SW_ATAC_482		chr1	27816208	27816922	SC_ATAC_482		chr1	32254630	32255079	HT_ATAC_482
		chr1	59279904	59280509	RT4_ATAC_483		chr3	122102662	122103578	SW_ATAC_483		chr1	27817006	27817206	SC_ATAC_483		chr1	32403678	32404446	HT_ATAC_483
		chr1	59280623	59281285	RT4_ATAC_484		chr7	23052538	23054101	SW_ATAC_484		chr1	27854591	27855420	SC_ATAC_484		chr1	32421638	32421955	HT_ATAC_484
		chr1	59350850	59351440	RT4_ATAC_485		chr14	64107930	64109307	SW_ATAC_485		chr1	27868848	27869866	SC_ATAC_485		chr1	32478869	32480526	HT_ATAC_485
		chr1	59369080	59369906	RT4_ATAC_486		chr5	74632572	74633701	SW_ATAC_486		chr1	27883349	27884711	SC_ATAC_486		chr1	32538183	32539160	HT_ATAC_486
		chr1	59398541	59399004	RT4_ATAC_487		chr20	38915218	38916278	SW_ATAC_487		chr1	27894912	27895494	SC_ATAC_487		chr1	32573285	32574313	HT_ATAC_487
		chr1	59762084	59762994	RT4_ATAC_488		chr1	247170514	247171656	SW_ATAC_488		chr1	27985396	27985708	SC_ATAC_488		chr1	32644974	32645831	HT_ATAC_488
		chr1	59892538	59893218	RT4_ATAC_489		chr5	49736260	49737788	SW_ATAC_489		chr1	27986176	27986456	SC_ATAC_489		chr1	32671021	32671517	HT_ATAC_489
		chr1	59893323	59893413	RT4_ATAC_490		chr4	52708473	52709942	SW_ATAC_490		chr1	27986539	27986746	SC_ATAC_490		chr1	32687480	32688717	HT_ATAC_490
		chr1	59965395	59966116	RT4_ATAC_491		chr20	39631610	39632807	SW_ATAC_491		chr1	28052053	28053113	SC_ATAC_491		chr1	32694494	32694673	HT_ATAC_491
		chr1	60139177	60139883	RT4_ATAC_492		chr7	97880617	97881963	SW_ATAC_492		chr1	28099219	28100263	SC_ATAC_492		chr1	32705638	32706497	HT_ATAC_492
		chr1	60280080	60281357	RT4_ATAC_493		chr2	179314886	179316579	SW_ATAC_493		chr1	28157111	28157907	SC_ATAC_493		chr1	32706704	32707461	HT_ATAC_493
		chr1	60392022	60392597	RT4_ATAC_494		chr8	6565282	6566950	SW_ATAC_494		chr1	28201715	28202155	SC_ATAC_494		chr1	32713574	32714172	HT_ATAC_494
		chr1	60521116	60521492	RT4_ATAC_495		chr12	75283298	75284346	SW_ATAC_495		chr1	28241008	28241399	SC_ATAC_495		chr1	32757385	32758480	HT_ATAC_495
		chr1	60543874	60544970	RT4_ATAC_496		chr7	121170111	121171854	SW_ATAC_496		chr1	28285935	28287012	SC_ATAC_496		chr1	32816670	32817816	HT_ATAC_496
		chr1	60554442	60554739	RT4_ATAC_497		chr3	179321727	179323358	SW_ATAC_497		chr1	28414476	28415588	SC_ATAC_497		chr1	32859541	32860622	HT_ATAC_497
		chr1	60746754	60747345	RT4_ATAC_498		chr11	102961851	102963456	SW_ATAC_498		chr1	28462147	28462575	SC_ATAC_498		chr1	32866511	32867048	HT_ATAC_498
		chr1	61038809	61039123	RT4_ATAC_499		chr3	160394401	160395750	SW_ATAC_499		chr1	28520332	28520692	SC_ATAC_499		chr1	33077548	33078071	HT_ATAC_499
		chr1	61039419	61039706	RT4_ATAC_500		chr20	30181030	30181953	SW_ATAC_500		chr1	28523511	28523822	SC_ATAC_500		chr1	33115869	33116286	HT_ATAC_500
		chr1	61407731	61408511	RT4_ATAC_501		chr5	96528409	96530334	SW_ATAC_501		chr1	28562387	28562876	SC_ATAC_501		chr1	33116484	33117403	HT_ATAC_501
		chr1	61515584	61516400	RT4_ATAC_502		chr6	83902313	83903900	SW_ATAC_502		chr1	28573677	28574037	SC_ATAC_502		chr1	33181939	33182741	HT_ATAC_502
		chr1	61522649	61523053	RT4_ATAC_503		chr4	68565385	68567543	SW_ATAC_503		chr1	28575077	28575227	SC_ATAC_503		chr1	33190630	33191100	HT_ATAC_503
		chr1	61542374	61543183	RT4_ATAC_504		chr8	79427865	79429692	SW_ATAC_504		chr1	28585620	28586118	SC_ATAC_504		chr1	33219365	33220690	HT_ATAC_504
		chr1	61543574	61543914	RT4_ATAC_505		chr1	221914743	221916865	SW_ATAC_505		chr1	28695910	28696812	SC_ATAC_505		chr1	33225692	33226268	HT_ATAC_505
		chr1	61615034	61615396	RT4_ATAC_506		chr9	104295449	104296652	SW_ATAC_506		chr1	28743955	28744395	SC_ATAC_506		chr1	33226526	33227412	HT_ATAC_506
		chr1	61803652	61804145	RT4_ATAC_507		chr14	39643854	39645114	SW_ATAC_507		chr1	28764345	28764762	SC_ATAC_507		chr1	33282375	33284043	HT_ATAC_507
		chr1	61804254	61804416	RT4_ATAC_508		chr16	78133108	78134277	SW_ATAC_508		chr1	28764855	28765031	SC_ATAC_508		chr1	33352013	33352594	HT_ATAC_508
		chr1	61919126	61919313	RT4_ATAC_509		chr8	74883862	74885278	SW_ATAC_509		chr1	28832259	28832797	SC_ATAC_509		chr1	33366745	33367332	HT_ATAC_509
		chr1	62190419	62191414	RT4_ATAC_510		chr2	183579923	183581691	SW_ATAC_510		chr1	28844377	28845127	SC_ATAC_510		chr1	33429260	33429956	HT_ATAC_510
		chr1	62207758	62208618	RT4_ATAC_511		chr11	82782086	82783450	SW_ATAC_511		chr1	28853321	28853744	SC_ATAC_511		chr1	33430419	33430701	HT_ATAC_511
		chr1	62901620	62902528	RT4_ATAC_512		chr14	81636141	81637401	SW_ATAC_512		chr1	28879124	28879229	SC_ATAC_512		chr1	33458055	33458507	HT_ATAC_512
		chr1	62902635	62903110	RT4_ATAC_513		chr2	166649594	166651383	SW_ATAC_513		chr1	28879322	28879690	SC_ATAC_513		chr1	33472881	33473468	HT_ATAC_513
		chr1	63153200	63154389	RT4_ATAC_514		chr9	104160064	104161821	SW_ATAC_514		chr1	28908060	28908785	SC_ATAC_514		chr1	33501614	33502782	HT_ATAC_514
		chr1	63249369	63249911	RT4_ATAC_515		chr2	36824521	36825468	SW_ATAC_515		chr1	28969083	28970024	SC_ATAC_515		chr1	33546369	33547297	HT_ATAC_515
		chr1	63782662	63783015	RT4_ATAC_516		chr2	114513226	114515019	SW_ATAC_516		chr1	28974735	28974926	SC_ATAC_516		chr1	33564701	33565510	HT_ATAC_516
		chr1	63783109	63783392	RT4_ATAC_517		chr6	166795359	166797533	SW_ATAC_517		chr1	28975069	28975933	SC_ATAC_517		chr1	33592589	33593343	HT_ATAC_517
		chr1	63832894	63833802	RT4_ATAC_518		chr2	167231687	167233097	SW_ATAC_518		chr1	29063003	29063863	SC_ATAC_518		chr1	33593813	33594241	HT_ATAC_518
		chr1	63953128	63953705	RT4_ATAC_519		chr18	657220	658794	SW_ATAC_519		chr1	29101621	29102340	SC_ATAC_519		chr1	33646022	33647868	HT_ATAC_519
		chr1	63988582	63988714	RT4_ATAC_520		chr5	61601473	61603166	SW_ATAC_520		chr1	29213476	29213695	SC_ATAC_520		chr1	33685165	33685759	HT_ATAC_520
		chr1	63988814	63989635	RT4_ATAC_521		chr7	143892046	143893229	SW_ATAC_521		chr1	29240680	29241511	SC_ATAC_521		chr1	33685937	33687284	HT_ATAC_521
		chr1	64023183	64023321	RT4_ATAC_522		chr12	74931067	74932656	SW_ATAC_522		chr1	29507878	29508087	SC_ATAC_522		chr1	33709627	33710724	HT_ATAC_522
		chr1	64058783	64060280	RT4_ATAC_523		chr20	50807335	50809219	SW_ATAC_523		chr1	29508173	29508750	SC_ATAC_523		chr1	33721021	33721681	HT_ATAC_523
		chr1	64157703	64157884	RT4_ATAC_524		chr2	136742362	136743759	SW_ATAC_524		chr1	29529351	29529657	SC_ATAC_524		chr1	33814787	33816272	HT_ATAC_524
		chr1	64239508	64240159	RT4_ATAC_525		chr8	67035888	67036879	SW_ATAC_525		chr1	29554017	29554571	SC_ATAC_525		chr1	33833243	33833645	HT_ATAC_525
		chr1	64385979	64386697	RT4_ATAC_526		chr20	39656701	39658514	SW_ATAC_526		chr1	29557208	29557613	SC_ATAC_526		chr1	33896040	33897056	HT_ATAC_526
		chr1	64472079	64473117	RT4_ATAC_527		chr4	144434166	144435425	SW_ATAC_527		chr1	29565688	29566178	SC_ATAC_527		chr1	33937769	33938471	HT_ATAC_527
		chr1	64505076	64505621	RT4_ATAC_528		chr7	30323667	30325014	SW_ATAC_528		chr1	29575516	29576347	SC_ATAC_528		chr1	33984612	33985185	HT_ATAC_528
		chr1	64734881	64735442	RT4_ATAC_529		chr1	186649144	186650510	SW_ATAC_529		chr1	30042712	30043163	SC_ATAC_529		chr1	34090385	34090861	HT_ATAC_529
		chr1	64808862	64809881	RT4_ATAC_530		chr3	113233059	113235278	SW_ATAC_530		chr1	30049406	30049646	SC_ATAC_530		chr1	34098724	34099468	HT_ATAC_530
		chr1	64935636	64936561	RT4_ATAC_531		chr6	160182327	160183969	SW_ATAC_531		chr1	30056442	30057167	SC_ATAC_531		chr1	34628613	34629075	HT_ATAC_531
		chr1	65152557	65152685	RT4_ATAC_532		chr20	25370345	25371852	SW_ATAC_532		chr1	30112763	30113207	SC_ATAC_532		chr1	35220263	35221395	HT_ATAC_532
		chr1	65152777	65153103	RT4_ATAC_533		chr3	178864929	178867487	SW_ATAC_533		chr1	30182271	30183136	SC_ATAC_533		chr1	35228211	35229625	HT_ATAC_533
		chr1	65210437	65211037	RT4_ATAC_534		chr12	100967048	100968387	SW_ATAC_534		chr1	31190849	31191896	SC_ATAC_534		chr1	35245212	35245382	HT_ATAC_534
		chr1	65363340	65364499	RT4_ATAC_535		chr13	78095279	78096926	SW_ATAC_535		chr1	31229180	31229948	SC_ATAC_535		chr1	35246679	35247515	HT_ATAC_535
		chr1	65381472	65381891	RT4_ATAC_536		chr9	68725964	68727212	SW_ATAC_536		chr1	31296695	31297548	SC_ATAC_536		chr1	35247673	35247969	HT_ATAC_536
		chr1	65414852	65415135	RT4_ATAC_537		chr1	99126633	99128149	SW_ATAC_537		chr1	31384286	31384462	SC_ATAC_537		chr1	35252094	35252310	HT_ATAC_537
		chr1	65431588	65432672	RT4_ATAC_538		chr14	53257599	53259105	SW_ATAC_538		chr1	31480101	31480512	SC_ATAC_538		chr1	35318301	35318620	HT_ATAC_538
		chr1	65467965	65468692	RT4_ATAC_539		chr2	7005231	7006833	SW_ATAC_539		chr1	31538216	31538365	SC_ATAC_539		chr1	35324446	35325760	HT_ATAC_539
		chr1	65532371	65533213	RT4_ATAC_540		chr5	130970380	130972141	SW_ATAC_540		chr1	31538454	31538884	SC_ATAC_540		chr1	35331569	35332585	HT_ATAC_540
		chr1	65675081	65675256	RT4_ATAC_541		chr11	77898900	77900415	SW_ATAC_541		chr1	31627502	31628508	SC_ATAC_541		chr1	35350585	35350786	HT_ATAC_541
		chr1	65681361	65681527	RT4_ATAC_542		chr11	44585888	44587686	SW_ATAC_542		chr1	31643482	31644091	SC_ATAC_542		chr1	35351236	35351670	HT_ATAC_542
		chr1	65681614	65681687	RT4_ATAC_543		chr2	44394880	44396500	SW_ATAC_543		chr1	31655020	31655143	SC_ATAC_543		chr1	35496634	35497904	HT_ATAC_543
		chr1	65719777	65721137	RT4_ATAC_544		chrX	63424775	63426668	SW_ATAC_544		chr1	31655244	31655549	SC_ATAC_544		chr1	35544688	35545824	HT_ATAC_544
		chr1	65775498	65775702	RT4_ATAC_545		chr8	71580647	71581782	SW_ATAC_545		chr1	31769354	31770110	SC_ATAC_545		chr1	35657463	35659206	HT_ATAC_545
		chr1	65885400	65886704	RT4_ATAC_546		chr5	6377938	6379091	SW_ATAC_546		chr1	31862931	31863315	SC_ATAC_546		chr1	35734012	35734877	HT_ATAC_546
		chr1	66153466	66153885	RT4_ATAC_547		chr1	70686677	70687694	SW_ATAC_547		chr1	31885889	31886116	SC_ATAC_547		chr1	36022535	36023738	HT_ATAC_547
		chr1	66605579	66606029	RT4_ATAC_548		chr3	138312349	138313877	SW_ATAC_548		chr1	31886333	31886897	SC_ATAC_548		chr1	36071361	36071836	HT_ATAC_548
		chr1	66708305	66708663	RT4_ATAC_549		chr2	20431329	20432982	SW_ATAC_549		chr1	31895203	31895771	SC_ATAC_549		chr1	36106626	36107400	HT_ATAC_549
		chr1	66719086	66719285	RT4_ATAC_550		chr1	197115172	197116570	SW_ATAC_550		chr1	31907577	31908101	SC_ATAC_550		chr1	36234821	36235934	HT_ATAC_550
		chr1	66760527	66760683	RT4_ATAC_551		chr2	208633194	208635179	SW_ATAC_551		chr1	31956248	31956716	SC_ATAC_551		chr1	36273193	36273714	HT_ATAC_551
		chr1	66760771	66761055	RT4_ATAC_552		chr11	82904393	82906006	SW_ATAC_552		chr1	32014319	32014778	SC_ATAC_552		chr1	36335146	36336024	HT_ATAC_552
		chr1	66781478	66781706	RT4_ATAC_553		chr5	115176751	115178454	SW_ATAC_553		chr1	32014866	32015395	SC_ATAC_553		chr1	36348415	36349743	HT_ATAC_553
		chr1	66797351	66798198	RT4_ATAC_554		chr2	86421976	86423341	SW_ATAC_554		chr1	32039453	32039778	SC_ATAC_554		chr1	36395989	36397425	HT_ATAC_554
		chr1	67029572	67030522	RT4_ATAC_555		chr2	132249160	132250966	SW_ATAC_555		chr1	32040642	32040879	SC_ATAC_555		chr1	36546367	36546918	HT_ATAC_555
		chr1	67041248	67041723	RT4_ATAC_556		chr2	136499001	136500341	SW_ATAC_556		chr1	32041004	32042247	SC_ATAC_556		chr1	36554096	36554989	HT_ATAC_556
		chr1	67191451	67192043	RT4_ATAC_557		chr2	139258691	139260279	SW_ATAC_557		chr1	32109981	32110991	SC_ATAC_557		chr1	36565086	36565454	HT_ATAC_557
		chr1	67254023	67254558	RT4_ATAC_558		chr12	65562878	65564649	SW_ATAC_558		chr1	32166493	32167468	SC_ATAC_558		chr1	36614673	36616733	HT_ATAC_558
		chr1	67390412	67391452	RT4_ATAC_559		chrX	15807863	15809453	SW_ATAC_559		chr1	32253744	32254393	SC_ATAC_559		chr1	36621211	36621859	HT_ATAC_559
		chr1	67395691	67396528	RT4_ATAC_560		chr1	67895262	67896999	SW_ATAC_560		chr1	32254499	32254779	SC_ATAC_560		chr1	36653128	36654183	HT_ATAC_560
		chr1	67518718	67520340	RT4_ATAC_561		chr3	121467991	121469003	SW_ATAC_561		chr1	32263967	32264587	SC_ATAC_561		chr1	36689667	36690657	HT_ATAC_561
		chr1	67526324	67526755	RT4_ATAC_562		chr3	33155247	33156356	SW_ATAC_562		chr1	32403884	32404528	SC_ATAC_562		chr1	36771701	36773102	HT_ATAC_562
		chr1	67614166	67615117	RT4_ATAC_563		chr3	152878216	152879443	SW_ATAC_563		chr1	32421585	32421934	SC_ATAC_563		chr1	36788461	36789540	HT_ATAC_563
		chr1	67628303	67628944	RT4_ATAC_564		chr5	44808707	44810109	SW_ATAC_564		chr1	32478937	32479546	SC_ATAC_564		chr1	36816315	36817491	HT_ATAC_564
		chr1	67677436	67677546	RT4_ATAC_565		chr1	74663258	74664496	SW_ATAC_565		chr1	32538176	32539172	SC_ATAC_565		chr1	36839443	36840534	HT_ATAC_565
		chr1	67695996	67696610	RT4_ATAC_566		chr15	89181591	89182792	SW_ATAC_566		chr1	32573878	32574342	SC_ATAC_566		chr1	36851128	36852533	HT_ATAC_566
		chr1	67813467	67813637	RT4_ATAC_567		chr2	42067596	42068743	SW_ATAC_567		chr1	32644820	32645834	SC_ATAC_567		chr1	36862801	36863728	HT_ATAC_567
		chr1	67896027	67897015	RT4_ATAC_568		chr14	59950175	59951889	SW_ATAC_568		chr1	32670761	32671340	SC_ATAC_568		chr1	36882355	36882709	HT_ATAC_568
		chr1	67944698	67945206	RT4_ATAC_569		chr2	157197662	157199653	SW_ATAC_569		chr1	32687645	32688083	SC_ATAC_569		chr1	36902190	36902776	HT_ATAC_569
		chr1	67966154	67966645	RT4_ATAC_570		chr5	130232865	130233860	SW_ATAC_570		chr1	32705832	32706468	SC_ATAC_570		chr1	36915596	36916854	HT_ATAC_570
		chr1	67998163	67998370	RT4_ATAC_571		chr1	236444570	236445928	SW_ATAC_571		chr1	32757293	32758146	SC_ATAC_571		chr1	36929720	36930512	HT_ATAC_571
		chr1	68001176	68001594	RT4_ATAC_572		chr20	39765280	39767001	SW_ATAC_572		chr1	32816731	32817737	SC_ATAC_572		chr1	37115955	37116330	HT_ATAC_572
		chr1	68021815	68022434	RT4_ATAC_573		chr5	101631406	101632874	SW_ATAC_573		chr1	32859547	32860708	SC_ATAC_573		chr1	37169368	37169629	HT_ATAC_573
		chr1	68027433	68027820	RT4_ATAC_574		chr1	235491117	235492755	SW_ATAC_574		chr1	33077588	33078055	SC_ATAC_574		chr1	37899793	37900179	HT_ATAC_574
		chr1	68038020	68038863	RT4_ATAC_575		chr14	24710995	24712732	SW_ATAC_575		chr1	33115867	33116283	SC_ATAC_575		chr1	37914357	37914627	HT_ATAC_575
		chr1	68084092	68084814	RT4_ATAC_576		chr4	48017899	48019651	SW_ATAC_576		chr1	33116468	33117074	SC_ATAC_576		chr1	37920336	37920894	HT_ATAC_576
		chr1	68150602	68151137	RT4_ATAC_577		chr1	185285301	185287373	SW_ATAC_577		chr1	33168173	33168481	SC_ATAC_577		chr1	37939730	37940312	HT_ATAC_577
		chr1	68151992	68152632	RT4_ATAC_578		chr2	187636126	187637374	SW_ATAC_578		chr1	33182258	33182760	SC_ATAC_578		chr1	37941925	37942678	HT_ATAC_578
		chr1	68179126	68179790	RT4_ATAC_579		chr1	213224184	213225201	SW_ATAC_579		chr1	33190096	33191253	SC_ATAC_579		chr1	37945372	37945684	HT_ATAC_579
		chr1	68189415	68189674	RT4_ATAC_580		chr2	43036905	43038231	SW_ATAC_580		chr1	33225688	33226209	SC_ATAC_580		chr1	37979475	37980925	HT_ATAC_580
		chr1	68215255	68216167	RT4_ATAC_581		chr5	150460021	150461228	SW_ATAC_581		chr1	33226525	33227408	SC_ATAC_581		chr1	37999525	38000623	HT_ATAC_581
		chr1	68225868	68226454	RT4_ATAC_582		chr3	174158239	174159679	SW_ATAC_582		chr1	33263856	33264337	SC_ATAC_582		chr1	38019416	38020042	HT_ATAC_582
		chr1	68298401	68299267	RT4_ATAC_583		chr10	25304757	25306453	SW_ATAC_583		chr1	33282426	33284070	SC_ATAC_583		chr1	38061036	38061965	HT_ATAC_583
		chr1	68316285	68316619	RT4_ATAC_584		chr4	186316995	186318560	SW_ATAC_584		chr1	33366746	33367393	SC_ATAC_584		chr1	38156127	38156645	HT_ATAC_584
		chr1	68585944	68586324	RT4_ATAC_585		chr1	222884661	222886951	SW_ATAC_585		chr1	33419818	33420119	SC_ATAC_585		chr1	38157138	38158600	HT_ATAC_585
		chr1	68624223	68624949	RT4_ATAC_586		chr7	64254392	64255490	SW_ATAC_586		chr1	33430145	33430688	SC_ATAC_586		chr1	38259392	38260163	HT_ATAC_586
		chr1	68698098	68698481	RT4_ATAC_587		chr5	159591828	159593151	SW_ATAC_587		chr1	33446669	33447370	SC_ATAC_587		chr1	38273062	38274467	HT_ATAC_587
		chr1	68735389	68735999	RT4_ATAC_588		chr5	81573518	81574634	SW_ATAC_588		chr1	33454832	33455144	SC_ATAC_588		chr1	38325018	38326202	HT_ATAC_588
		chr1	68786889	68787060	RT4_ATAC_589		chr7	120496813	120498603	SW_ATAC_589		chr1	33457898	33458649	SC_ATAC_589		chr1	38396832	38397870	HT_ATAC_589
		chr1	68787146	68787227	RT4_ATAC_590		chr2	24298748	24300504	SW_ATAC_590		chr1	33472897	33473324	SC_ATAC_590		chr1	38454882	38456043	HT_ATAC_590
		chr1	68808542	68808758	RT4_ATAC_591		chr7	112579083	112580666	SW_ATAC_591		chr1	33501626	33502766	SC_ATAC_591		chr1	38478013	38478948	HT_ATAC_591
		chr1	68849744	68850470	RT4_ATAC_592		chr8	135724495	135725956	SW_ATAC_592		chr1	33515790	33516481	SC_ATAC_592		chr1	38512456	38513418	HT_ATAC_592
		chr1	68936187	68936290	RT4_ATAC_593		chr5	157339301	157340549	SW_ATAC_593		chr1	33520821	33521002	SC_ATAC_593		chr1	38588975	38589321	HT_ATAC_593
		chr1	68961298	68961437	RT4_ATAC_594		chr14	64008904	64010825	SW_ATAC_594		chr1	33546375	33546990	SC_ATAC_594		chr1	38591822	38592272	HT_ATAC_594
		chr1	68961955	68963267	RT4_ATAC_595		chr2	65356538	65358133	SW_ATAC_595		chr1	33564862	33565486	SC_ATAC_595		chr1	38604047	38604821	HT_ATAC_595
		chr1	69285213	69285344	RT4_ATAC_596		chr10	38264417	38265872	SW_ATAC_596		chr1	33592789	33593560	SC_ATAC_596		chr1	39201220	39201770	HT_ATAC_596
		chr1	70670780	70671753	RT4_ATAC_597		chr13	52585463	52586652	SW_ATAC_597		chr1	33646185	33647846	SC_ATAC_597		chr1	39324369	39326035	HT_ATAC_597
		chr1	70686909	70687664	RT4_ATAC_598		chr3	23957906	23959440	SW_ATAC_598		chr1	33685334	33685760	SC_ATAC_598		chr1	39338401	39339459	HT_ATAC_598
		chr1	70819430	70820786	RT4_ATAC_599		chr13	49106008	49107359	SW_ATAC_599		chr1	33686380	33687291	SC_ATAC_599		chr1	39406888	39407930	HT_ATAC_599
		chr1	70876261	70877506	RT4_ATAC_600		chr7	75368085	75369258	SW_ATAC_600		chr1	33793240	33793930	SC_ATAC_600		chr1	39456484	39457733	HT_ATAC_600
		chr1	70975717	70976041	RT4_ATAC_601		chr3	156892140	156893391	SW_ATAC_601		chr1	33815410	33815752	SC_ATAC_601		chr1	39491632	39492787	HT_ATAC_601
		chr1	70994527	70994675	RT4_ATAC_602		chr6	20212094	20213301	SW_ATAC_602		chr1	33896270	33897042	SC_ATAC_602		chr1	39546990	39547804	HT_ATAC_602
		chr1	71151049	71151259	RT4_ATAC_603		chr2	32288055	32289637	SW_ATAC_603		chr1	33899253	33899686	SC_ATAC_603		chr1	39564075	39564585	HT_ATAC_603
		chr1	71546632	71547135	RT4_ATAC_604		chr2	88990496	88992126	SW_ATAC_604		chr1	33921552	33921683	SC_ATAC_604		chr1	39570455	39571739	HT_ATAC_604
		chr1	71987260	71987595	RT4_ATAC_605		chr6	99394710	99396276	SW_ATAC_605		chr1	33937921	33938503	SC_ATAC_605		chr1	39582665	39583649	HT_ATAC_605
		chr1	72748422	72748728	RT4_ATAC_606		chr7	64498094	64499776	SW_ATAC_606		chr1	34098733	34099135	SC_ATAC_606		chr1	39598580	39599079	HT_ATAC_606
		chr1	73088988	73089359	RT4_ATAC_607		chr13	97636148	97636832	SW_ATAC_607		chr1	35208341	35208550	SC_ATAC_607		chr1	39608131	39608846	HT_ATAC_607
		chr1	73531278	73531593	RT4_ATAC_608		chr2	172290265	172291412	SW_ATAC_608		chr1	35220254	35221409	SC_ATAC_608		chr1	39649149	39649974	HT_ATAC_608
		chr1	74058783	74059820	RT4_ATAC_609		chr8	74790159	74791743	SW_ATAC_609		chr1	35228189	35229673	SC_ATAC_609		chr1	39657887	39658423	HT_ATAC_609
		chr1	74139566	74139998	RT4_ATAC_610		chr3	155571546	155573049	SW_ATAC_610		chr1	35246693	35246849	SC_ATAC_610		chr1	39679802	39680579	HT_ATAC_610
		chr1	74194811	74194905	RT4_ATAC_611		chr5	8457369	8458533	SW_ATAC_611		chr1	35246934	35247540	SC_ATAC_611		chr1	39686640	39686863	HT_ATAC_611
		chr1	74269111	74269421	RT4_ATAC_612		chr2	25193969	25195333	SW_ATAC_612		chr1	35247679	35247957	SC_ATAC_612		chr1	39863995	39864712	HT_ATAC_612
		chr1	74279492	74279824	RT4_ATAC_613		chr4	159131171	159131842	SW_ATAC_613		chr1	35318306	35318579	SC_ATAC_613		chr1	39874046	39875093	HT_ATAC_613
		chr1	74324980	74325356	RT4_ATAC_614		chr1	95538082	95539266	SW_ATAC_614		chr1	35324752	35325568	SC_ATAC_614		chr1	39956421	39957532	HT_ATAC_614
		chr1	74663313	74664260	RT4_ATAC_615		chrX	7049736	7051585	SW_ATAC_615		chr1	35331506	35332223	SC_ATAC_615		chr1	40004730	40005169	HT_ATAC_615
		chr1	74688272	74688850	RT4_ATAC_616		chr14	54863180	54864719	SW_ATAC_616		chr1	35449941	35451375	SC_ATAC_616		chr1	40041184	40041897	HT_ATAC_616
		chr1	74969922	74970107	RT4_ATAC_617		chr16	66311697	66312872	SW_ATAC_617		chr1	35497216	35497726	SC_ATAC_617		chr1	40156854	40157913	HT_ATAC_617
		chr1	75118092	75119021	RT4_ATAC_618		chr1	247241127	247242496	SW_ATAC_618		chr1	35544688	35545415	SC_ATAC_618		chr1	40204337	40205083	HT_ATAC_618
		chr1	75198265	75198580	RT4_ATAC_619		chr1	171454007	171455572	SW_ATAC_619		chr1	35551023	35551411	SC_ATAC_619		chr1	40254224	40255495	HT_ATAC_619
		chr1	75198668	75199212	RT4_ATAC_620		chr2	198380077	198381547	SW_ATAC_620		chr1	35657451	35658567	SC_ATAC_620		chr1	40264781	40265876	HT_ATAC_620
		chr1	75199298	75199650	RT4_ATAC_621		chr3	169939716	169941328	SW_ATAC_621		chr1	35658701	35659156	SC_ATAC_621		chr1	40282414	40283188	HT_ATAC_621
		chr1	75669446	75669625	RT4_ATAC_622		chr19	55850043	55851348	SW_ATAC_622		chr1	35734102	35734933	SC_ATAC_622		chr1	40295617	40296159	HT_ATAC_622
		chr1	75699115	75699288	RT4_ATAC_623		chr6	117996000	117997384	SW_ATAC_623		chr1	35914990	35915409	SC_ATAC_623		chr1	40348810	40350044	HT_ATAC_623
		chr1	75731443	75731863	RT4_ATAC_624		chr3	99535923	99537307	SW_ATAC_624		chr1	36022565	36023604	SC_ATAC_624		chr1	40366414	40366874	HT_ATAC_624
		chr1	76080474	76081079	RT4_ATAC_625		chr2	32581504	32583132	SW_ATAC_625		chr1	36106864	36107472	SC_ATAC_625		chr1	40367050	40368210	HT_ATAC_625
		chr1	76081600	76081916	RT4_ATAC_626		chr9	79791822	79793603	SW_ATAC_626		chr1	36184016	36184925	SC_ATAC_626		chr1	40385255	40385498	HT_ATAC_626
		chr1	76098140	76098278	RT4_ATAC_627		chr10	16858925	16860023	SW_ATAC_627		chr1	36234832	36235935	SC_ATAC_627		chr1	40420624	40422066	HT_ATAC_627
		chr1	76174627	76175241	RT4_ATAC_628		chr12	64173259	64174445	SW_ATAC_628		chr1	36335085	36335452	SC_ATAC_628		chr1	40446015	40446966	HT_ATAC_628
		chr1	76189926	76190747	RT4_ATAC_629		chr3	25704889	25707172	SW_ATAC_629		chr1	36348581	36348907	SC_ATAC_629		chr1	40447554	40447934	HT_ATAC_629
		chr1	76231490	76231681	RT4_ATAC_630		chr14	63158345	63159300	SW_ATAC_630		chr1	36395987	36396087	SC_ATAC_630		chr1	40479945	40480397	HT_ATAC_630
		chr1	76251526	76251626	RT4_ATAC_631		chr8	1693119	1694661	SW_ATAC_631		chr1	36396231	36397175	SC_ATAC_631		chr1	40480642	40481439	HT_ATAC_631
		chr1	76251710	76252437	RT4_ATAC_632		chr11	134122645	134124083	SW_ATAC_632		chr1	36554311	36554996	SC_ATAC_632		chr1	40505281	40507000	HT_ATAC_632
		chr1	76457314	76457515	RT4_ATAC_633		chr12	62859815	62861715	SW_ATAC_633		chr1	36565273	36565459	SC_ATAC_633		chr1	40562442	40563632	HT_ATAC_633
		chr1	76539849	76540660	RT4_ATAC_634		chr11	123611236	123612571	SW_ATAC_634		chr1	36565549	36565864	SC_ATAC_634		chr1	40572927	40573782	HT_ATAC_634
		chr1	76619868	76620094	RT4_ATAC_635		chr3	133523855	133525367	SW_ATAC_635		chr1	36574663	36575086	SC_ATAC_635		chr1	40605834	40606723	HT_ATAC_635
		chr1	76796586	76797126	RT4_ATAC_636		chr13	96704926	96706427	SW_ATAC_636		chr1	36600441	36600820	SC_ATAC_636		chr1	40626681	40627994	HT_ATAC_636
		chr1	77436875	77437132	RT4_ATAC_637		chr15	31617793	31619362	SW_ATAC_637		chr1	36614619	36615652	SC_ATAC_637		chr1	40722984	40724352	HT_ATAC_637
		chr1	77533781	77534038	RT4_ATAC_638		chr2	130938855	130940551	SW_ATAC_638		chr1	36616077	36616707	SC_ATAC_638		chr1	40770379	40770558	HT_ATAC_638
		chr1	77684479	77685279	RT4_ATAC_639		chr5	93446547	93447735	SW_ATAC_639		chr1	36621387	36621589	SC_ATAC_639		chr1	40770751	40770983	HT_ATAC_639
		chr1	77747417	77748316	RT4_ATAC_640		chr3	33137653	33139311	SW_ATAC_640		chr1	36621698	36621987	SC_ATAC_640		chr1	40771140	40771730	HT_ATAC_640
		chr1	77787718	77788196	RT4_ATAC_641		chr14	50100218	50102336	SW_ATAC_641		chr1	36627574	36628074	SC_ATAC_641		chr1	40780864	40781869	HT_ATAC_641
		chr1	77859944	77860233	RT4_ATAC_642		chr2	208030787	208031775	SW_ATAC_642		chr1	36653398	36654024	SC_ATAC_642		chr1	40839080	40840347	HT_ATAC_642
		chr1	77877827	77878685	RT4_ATAC_643		chr4	17811837	17813109	SW_ATAC_643		chr1	36689426	36690356	SC_ATAC_643		chr1	40915394	40916799	HT_ATAC_643
		chr1	77912738	77913693	RT4_ATAC_644		chr12	22696391	22697841	SW_ATAC_644		chr1	36690444	36690601	SC_ATAC_644		chr1	40942607	40943644	HT_ATAC_644
		chr1	78148047	78148449	RT4_ATAC_645		chr7	108165750	108167194	SW_ATAC_645		chr1	36765498	36765973	SC_ATAC_645		chr1	40974032	40975282	HT_ATAC_645
		chr1	78148565	78149585	RT4_ATAC_646		chr11	108463417	108464989	SW_ATAC_646		chr1	36771546	36773119	SC_ATAC_646		chr1	40996761	40997875	HT_ATAC_646
		chr1	78224643	78225009	RT4_ATAC_647		chr12	44199209	44200495	SW_ATAC_647		chr1	36788663	36789558	SC_ATAC_647		chr1	41130942	41131646	HT_ATAC_647
		chr1	78225110	78225693	RT4_ATAC_648		chr1	174968364	174969834	SW_ATAC_648		chr1	36808402	36809097	SC_ATAC_648		chr1	41157108	41158460	HT_ATAC_648
		chr1	78245172	78246003	RT4_ATAC_649		chr5	81046197	81047864	SW_ATAC_649		chr1	36816242	36816782	SC_ATAC_649		chr1	41174828	41175465	HT_ATAC_649
		chr1	78290910	78291296	RT4_ATAC_650		chr3	115502794	115503814	SW_ATAC_650		chr1	36839429	36840581	SC_ATAC_650		chr1	41177128	41177347	HT_ATAC_650
		chr1	78443866	78444125	RT4_ATAC_651		chr14	45722118	45723522	SW_ATAC_651		chr1	36851059	36851870	SC_ATAC_651		chr1	41177504	41177629	HT_ATAC_651
		chr1	78444523	78445314	RT4_ATAC_652		chr14	90421844	90423059	SW_ATAC_652		chr1	36852088	36852729	SC_ATAC_652		chr1	41284194	41284618	HT_ATAC_652
		chr1	78470326	78470767	RT4_ATAC_653		chr3	38065590	38066890	SW_ATAC_653		chr1	36862800	36863673	SC_ATAC_653		chr1	41315763	41315948	HT_ATAC_653
		chr1	78579747	78580350	RT4_ATAC_654		chr12	75784398	75785403	SW_ATAC_654		chr1	36915752	36916536	SC_ATAC_654		chr1	41327298	41328702	HT_ATAC_654
		chr1	78608730	78609453	RT4_ATAC_655		chr10	76585158	76587096	SW_ATAC_655		chr1	36929890	36930160	SC_ATAC_655		chr1	41364193	41365590	HT_ATAC_655
		chr1	78703040	78703836	RT4_ATAC_656		chr20	40321382	40323241	SW_ATAC_656		chr1	36977483	36977795	SC_ATAC_656		chr1	41418022	41418611	HT_ATAC_656
		chr1	78720092	78720727	RT4_ATAC_657		chr20	10015380	10016324	SW_ATAC_657		chr1	36977887	36978154	SC_ATAC_657		chr1	41433200	41433872	HT_ATAC_657
		chr1	78799226	78799380	RT4_ATAC_658		chr14	81769095	81770450	SW_ATAC_658		chr1	37900040	37900160	SC_ATAC_658		chr1	41442706	41442932	HT_ATAC_658
		chr1	78825484	78825858	RT4_ATAC_659		chr1	119682567	119684122	SW_ATAC_659		chr1	37913846	37914840	SC_ATAC_659		chr1	41443096	41443201	HT_ATAC_659
		chr1	79083287	79083679	RT4_ATAC_660		chr4	52706	54790	SW_ATAC_660		chr1	37920527	37920952	SC_ATAC_660		chr1	41444787	41446278	HT_ATAC_660
		chr1	79115363	79115600	RT4_ATAC_661		chrX	130036245	130037574	SW_ATAC_661		chr1	37937179	37937569	SC_ATAC_661		chr1	41469366	41469809	HT_ATAC_661
		chr1	79594360	79594779	RT4_ATAC_662		chr6	88653944	88655244	SW_ATAC_662		chr1	37942075	37942460	SC_ATAC_662		chr1	41575038	41575920	HT_ATAC_662
		chr1	79616715	79617391	RT4_ATAC_663		chr3	150263283	150265390	SW_ATAC_663		chr1	37942802	37943304	SC_ATAC_663		chr1	41706964	41708326	HT_ATAC_663
		chr1	79658769	79659110	RT4_ATAC_664		chr5	156817359	156818204	SW_ATAC_664		chr1	37945275	37945839	SC_ATAC_664		chr1	41812995	41813286	HT_ATAC_664
		chr1	79659196	79659600	RT4_ATAC_665		chr2	55843656	55845177	SW_ATAC_665		chr1	37979726	37980842	SC_ATAC_665		chr1	41819416	41819795	HT_ATAC_665
		chr1	79788852	79789478	RT4_ATAC_666		chr4	99063810	99065064	SW_ATAC_666		chr1	38061092	38061964	SC_ATAC_666		chr1	41825966	41826151	HT_ATAC_666
		chr1	80073077	80073426	RT4_ATAC_667		chr8	61429039	61430274	SW_ATAC_667		chr1	38156116	38156456	SC_ATAC_667		chr1	41826458	41827965	HT_ATAC_667
		chr1	80211707	80211925	RT4_ATAC_668		chr7	35839717	35841756	SW_ATAC_668		chr1	38157268	38158241	SC_ATAC_668		chr1	41884573	41885321	HT_ATAC_668
		chr1	81059632	81060181	RT4_ATAC_669		chr4	128801257	128802897	SW_ATAC_669		chr1	38184641	38184787	SC_ATAC_669		chr1	41898119	41898901	HT_ATAC_669
		chr1	81644794	81645455	RT4_ATAC_670		chr16	21512843	21514272	SW_ATAC_670		chr1	38273261	38273529	SC_ATAC_670		chr1	41961939	41962833	HT_ATAC_670
		chr1	81658360	81658977	RT4_ATAC_671		chr12	44152056	44153489	SW_ATAC_671		chr1	38273613	38274509	SC_ATAC_671		chr1	41980685	41981386	HT_ATAC_671
		chr1	81771958	81772263	RT4_ATAC_672		chr8	80941723	80942874	SW_ATAC_672		chr1	38325202	38326040	SC_ATAC_672		chr1	41981711	41982337	HT_ATAC_672
		chr1	81880094	81880371	RT4_ATAC_673		chr16	81039981	81041377	SW_ATAC_673		chr1	38396837	38397870	SC_ATAC_673		chr1	42137837	42138462	HT_ATAC_673
		chr1	81975346	81975615	RT4_ATAC_674		chr15	85258632	85260308	SW_ATAC_674		chr1	38455107	38456043	SC_ATAC_674		chr1	42327989	42329067	HT_ATAC_674
		chr1	82125742	82126289	RT4_ATAC_675		chr3	28282427	28283921	SW_ATAC_675		chr1	38461302	38462170	SC_ATAC_675		chr1	42385526	42385996	HT_ATAC_675
		chr1	82144526	82144990	RT4_ATAC_676		chr1	247266843	247268102	SW_ATAC_676		chr1	38478033	38478955	SC_ATAC_676		chr1	42500923	42502002	HT_ATAC_676
		chr1	82147211	82147614	RT4_ATAC_677		chr9	86535601	86536859	SW_ATAC_677		chr1	38492652	38493932	SC_ATAC_677		chr1	42617790	42618064	HT_ATAC_677
		chr1	82168648	82168909	RT4_ATAC_678		chr19	35738514	35740073	SW_ATAC_678		chr1	38512450	38513672	SC_ATAC_678		chr1	42631031	42631781	HT_ATAC_678
		chr1	82266579	82266889	RT4_ATAC_679		chr11	102979716	102981046	SW_ATAC_679		chr1	38582885	38583967	SC_ATAC_679		chr1	42639121	42639955	HT_ATAC_679
		chr1	82266993	82267348	RT4_ATAC_680		chr6	105306658	105308358	SW_ATAC_680		chr1	38588987	38589320	SC_ATAC_680		chr1	42671841	42672232	HT_ATAC_680
		chr1	82267647	82268015	RT4_ATAC_681		chr14	59654719	59656429	SW_ATAC_681		chr1	38604040	38605112	SC_ATAC_681		chr1	42687803	42688264	HT_ATAC_681
		chr1	82268504	82268826	RT4_ATAC_682		chr11	6255260	6256851	SW_ATAC_682		chr1	38774396	38774752	SC_ATAC_682		chr1	42800021	42801818	HT_ATAC_682
		chr1	82378061	82378613	RT4_ATAC_683		chr5	32173425	32175332	SW_ATAC_683		chr1	38992885	38993706	SC_ATAC_683		chr1	42845581	42845729	HT_ATAC_683
		chr1	82415159	82415630	RT4_ATAC_684		chr4	108640490	108642120	SW_ATAC_684		chr1	39054528	39055327	SC_ATAC_684		chr1	42845975	42846739	HT_ATAC_684
		chr1	82464962	82465511	RT4_ATAC_685		chr12	32831845	32832979	SW_ATAC_685		chr1	39324544	39325713	SC_ATAC_685		chr1	42921510	42922865	HT_ATAC_685
		chr1	83616769	83617272	RT4_ATAC_686		chr20	52824095	52825503	SW_ATAC_686		chr1	39338407	39339489	SC_ATAC_686		chr1	42928445	42929457	HT_ATAC_686
		chr1	83629662	83630071	RT4_ATAC_687		chr20	25603630	25605301	SW_ATAC_687		chr1	39406850	39407697	SC_ATAC_687		chr1	43123674	43125137	HT_ATAC_687
		chr1	83966652	83967144	RT4_ATAC_688		chr2	9695068	9696612	SW_ATAC_688		chr1	39456694	39457766	SC_ATAC_688		chr1	43147390	43149005	HT_ATAC_688
		chr1	84158706	84158815	RT4_ATAC_689		chr14	61746924	61748605	SW_ATAC_689		chr1	39491699	39492529	SC_ATAC_689		chr1	43208718	43209455	HT_ATAC_689
		chr1	84158898	84159291	RT4_ATAC_690		chr1	78224590	78225763	SW_ATAC_690		chr1	39570853	39571170	SC_ATAC_690		chr1	43222405	43222948	HT_ATAC_690
		chr1	84326191	84326849	RT4_ATAC_691		chr15	86337257	86338606	SW_ATAC_691		chr1	39582501	39582924	SC_ATAC_691		chr1	43232142	43233462	HT_ATAC_691
		chr1	84367276	84367718	RT4_ATAC_692		chr7	122525683	122527148	SW_ATAC_692		chr1	39608372	39608801	SC_ATAC_692		chr1	43282043	43283330	HT_ATAC_692
		chr1	84464260	84465231	RT4_ATAC_693		chr8	56684640	56686548	SW_ATAC_693		chr1	39649136	39650009	SC_ATAC_693		chr1	43311712	43312823	HT_ATAC_693
		chr1	84485966	84486227	RT4_ATAC_694		chr2	203878794	203880301	SW_ATAC_694		chr1	39657369	39657543	SC_ATAC_694		chr1	43389564	43390847	HT_ATAC_694
		chr1	84543137	84544416	RT4_ATAC_695		chr1	144931593	144933186	SW_ATAC_695		chr1	39657670	39658568	SC_ATAC_695		chr1	43402051	43402535	HT_ATAC_695
		chr1	84738159	84738397	RT4_ATAC_696		chr1	84971013	84972590	SW_ATAC_696		chr1	39864030	39864709	SC_ATAC_696		chr1	43406765	43407047	HT_ATAC_696
		chr1	84852448	84853055	RT4_ATAC_697		chr3	107940729	107942143	SW_ATAC_697		chr1	39874024	39874978	SC_ATAC_697		chr1	43407483	43407927	HT_ATAC_697
		chr1	84893335	84893492	RT4_ATAC_698		chr11	134201443	134202659	SW_ATAC_698		chr1	39956592	39957316	SC_ATAC_698		chr1	43408914	43409251	HT_ATAC_698
		chr1	84944810	84945037	RT4_ATAC_699		chr12	105500919	105502205	SW_ATAC_699		chr1	40042413	40042878	SC_ATAC_699		chr1	43423438	43425149	HT_ATAC_699
		chr1	84945137	84945557	RT4_ATAC_700		chr2	131555065	131556041	SW_ATAC_700		chr1	40098610	40099081	SC_ATAC_700		chr1	43432601	43433256	HT_ATAC_700
		chr1	84971307	84972513	RT4_ATAC_701		chr6	146055811	146057279	SW_ATAC_701		chr1	40157017	40157251	SC_ATAC_701		chr1	43471162	43472051	HT_ATAC_701
		chr1	85039518	85040466	RT4_ATAC_702		chr6	126068801	126071283	SW_ATAC_702		chr1	40204279	40204837	SC_ATAC_702		chr1	43487004	43488156	HT_ATAC_702
		chr1	85086404	85086887	RT4_ATAC_703		chr2	85968248	85969999	SW_ATAC_703		chr1	40254224	40254319	SC_ATAC_703		chr1	43540080	43540194	HT_ATAC_703
		chr1	85155554	85156561	RT4_ATAC_704		chr11	92930066	92931690	SW_ATAC_704		chr1	40264770	40265896	SC_ATAC_704		chr1	43587007	43587270	HT_ATAC_704
		chr1	85300030	85300634	RT4_ATAC_705		chr1	246729119	246730446	SW_ATAC_705		chr1	40282201	40283337	SC_ATAC_705		chr1	43613126	43613908	HT_ATAC_705
		chr1	85308398	85308956	RT4_ATAC_706		chr8	67686616	67688113	SW_ATAC_706		chr1	40348856	40349338	SC_ATAC_706		chr1	43637412	43638470	HT_ATAC_706
		chr1	85312976	85313254	RT4_ATAC_707		chr8	97273479	97275276	SW_ATAC_707		chr1	40367344	40368255	SC_ATAC_707		chr1	43672235	43673712	HT_ATAC_707
		chr1	85319874	85320365	RT4_ATAC_708		chr7	112090765	112091641	SW_ATAC_708		chr1	40399780	40400635	SC_ATAC_708		chr1	43736104	43736710	HT_ATAC_708
		chr1	85358211	85359289	RT4_ATAC_709		chr14	31027837	31029298	SW_ATAC_709		chr1	40420600	40421090	SC_ATAC_709		chr1	43750841	43751613	HT_ATAC_709
		chr1	85410443	85410926	RT4_ATAC_710		chr14	60557870	60559797	SW_ATAC_710		chr1	40505342	40506501	SC_ATAC_710		chr1	43814199	43815404	HT_ATAC_710
		chr1	85513844	85514694	RT4_ATAC_711		chr3	100318889	100320071	SW_ATAC_711		chr1	40573148	40573600	SC_ATAC_711		chr1	43823828	43825349	HT_ATAC_711
		chr1	85527426	85528272	RT4_ATAC_712		chr14	20929088	20930243	SW_ATAC_712		chr1	40626826	40627149	SC_ATAC_712		chr1	43831944	43832319	HT_ATAC_712
		chr1	85666182	85667480	RT4_ATAC_713		chr21	15754866	15756430	SW_ATAC_713		chr1	40722961	40724159	SC_ATAC_713		chr1	43832530	43834303	HT_ATAC_713
		chr1	85667583	85667901	RT4_ATAC_714		chr3	37216918	37218413	SW_ATAC_714		chr1	40839008	40839630	SC_ATAC_714		chr1	43838818	43838980	HT_ATAC_714
		chr1	85690517	85691560	RT4_ATAC_715		chr1	65363242	65364551	SW_ATAC_715		chr1	40915642	40916117	SC_ATAC_715		chr1	43854947	43855929	HT_ATAC_715
		chr1	85696108	85696601	RT4_ATAC_716		chr7	30543819	30545096	SW_ATAC_716		chr1	40997124	40997904	SC_ATAC_716		chr1	43918506	43919805	HT_ATAC_716
		chr1	85725278	85725543	RT4_ATAC_717		chr6	118971638	118973175	SW_ATAC_717		chr1	41078308	41078600	SC_ATAC_717		chr1	43941460	43942362	HT_ATAC_717
		chr1	85741810	85742758	RT4_ATAC_718		chr8	1711817	1713319	SW_ATAC_718		chr1	41157108	41158469	SC_ATAC_718		chr1	43974854	43976324	HT_ATAC_718
		chr1	85755186	85755937	RT4_ATAC_719		chr2	109149680	109151184	SW_ATAC_719		chr1	41174503	41175066	SC_ATAC_719		chr1	43988662	43989228	HT_ATAC_719
		chr1	85773870	85774204	RT4_ATAC_720		chr8	132915807	132917460	SW_ATAC_720		chr1	41327638	41328525	SC_ATAC_720		chr1	44015478	44016311	HT_ATAC_720
		chr1	85930216	85931305	RT4_ATAC_721		chr7	143990626	143991845	SW_ATAC_721		chr1	41352251	41353037	SC_ATAC_721		chr1	44047673	44048237	HT_ATAC_721
		chr1	85961138	85961556	RT4_ATAC_722		chr10	85898951	85900337	SW_ATAC_722		chr1	41364937	41365530	SC_ATAC_722		chr1	44115135	44116397	HT_ATAC_722
		chr1	86010379	86010670	RT4_ATAC_723		chr9	123604703	123605827	SW_ATAC_723		chr1	41433164	41433925	SC_ATAC_723		chr1	44172792	44173831	HT_ATAC_723
		chr1	86046267	86047186	RT4_ATAC_724		chr3	101881730	101882950	SW_ATAC_724		chr1	41444984	41445780	SC_ATAC_724		chr1	44248831	44249843	HT_ATAC_724
		chr1	86072734	86073319	RT4_ATAC_725		chr7	51443752	51444711	SW_ATAC_725		chr1	41469380	41469820	SC_ATAC_725		chr1	44323820	44324555	HT_ATAC_725
		chr1	86077452	86077893	RT4_ATAC_726		chr16	53132817	53134181	SW_ATAC_726		chr1	41472520	41473437	SC_ATAC_726		chr1	44351130	44351372	HT_ATAC_726
		chr1	86173549	86174451	RT4_ATAC_727		chr11	125931985	125933564	SW_ATAC_727		chr1	41826608	41827186	SC_ATAC_727		chr1	44378268	44378831	HT_ATAC_727
		chr1	86284024	86284243	RT4_ATAC_728		chr3	142837829	142839630	SW_ATAC_728		chr1	41848483	41848635	SC_ATAC_728		chr1	44395324	44395522	HT_ATAC_728
		chr1	86570413	86571266	RT4_ATAC_729		chr4	174254874	174256816	SW_ATAC_729		chr1	41884596	41885376	SC_ATAC_729		chr1	44411683	44413077	HT_ATAC_729
		chr1	86860931	86862224	RT4_ATAC_730		chr2	201675625	201677488	SW_ATAC_730		chr1	41898145	41898907	SC_ATAC_730		chr1	44435383	44436060	HT_ATAC_730
		chr1	87008091	87008649	RT4_ATAC_731		chr2	64977737	64979283	SW_ATAC_731		chr1	41950068	41950809	SC_ATAC_731		chr1	44440066	44441603	HT_ATAC_731
		chr1	87169676	87169993	RT4_ATAC_732		chr13	111566455	111568252	SW_ATAC_732		chr1	41961862	41962226	SC_ATAC_732		chr1	44456661	44457930	HT_ATAC_732
		chr1	87170084	87171233	RT4_ATAC_733		chr1	162530469	162532337	SW_ATAC_733		chr1	41967198	41967819	SC_ATAC_733		chr1	44471403	44471992	HT_ATAC_733
		chr1	87254086	87254559	RT4_ATAC_734		chr5	112311805	112313488	SW_ATAC_734		chr1	41981808	41982046	SC_ATAC_734		chr1	44495432	44496838	HT_ATAC_734
		chr1	87258464	87259085	RT4_ATAC_735		chr13	77565669	77567269	SW_ATAC_735		chr1	42128502	42128810	SC_ATAC_735		chr1	44496990	44497360	HT_ATAC_735
		chr1	87379724	87379871	RT4_ATAC_736		chr3	112709494	112710481	SW_ATAC_736		chr1	42130848	42131296	SC_ATAC_736		chr1	44678972	44679403	HT_ATAC_736
		chr1	87379961	87380912	RT4_ATAC_737		chr16	72126795	72128291	SW_ATAC_737		chr1	42137837	42138250	SC_ATAC_737		chr1	44793233	44794160	HT_ATAC_737
		chr1	87458333	87459289	RT4_ATAC_738		chr14	90420603	90421611	SW_ATAC_738		chr1	42145118	42145824	SC_ATAC_738		chr1	44820683	44821212	HT_ATAC_738
		chr1	87692035	87692482	RT4_ATAC_739		chr7	16792994	16794195	SW_ATAC_739		chr1	42248896	42249303	SC_ATAC_739		chr1	45097151	45098190	HT_ATAC_739
		chr1	87793916	87794210	RT4_ATAC_740		chr13	99136288	99137825	SW_ATAC_740		chr1	42366354	42366576	SC_ATAC_740		chr1	45139527	45140639	HT_ATAC_740
		chr1	87851523	87852377	RT4_ATAC_741		chr2	122406159	122407983	SW_ATAC_741		chr1	42420349	42420625	SC_ATAC_741		chr1	45173651	45173819	HT_ATAC_741
		chr1	87858573	87858756	RT4_ATAC_742		chr5	112849071	112850083	SW_ATAC_742		chr1	42421112	42421782	SC_ATAC_742		chr1	45186535	45187611	HT_ATAC_742
		chr1	87916423	87916903	RT4_ATAC_743		chr20	54966624	54968043	SW_ATAC_743		chr1	42501312	42502228	SC_ATAC_743		chr1	45196165	45197209	HT_ATAC_743
		chr1	87938534	87939456	RT4_ATAC_744		chr11	58873794	58875543	SW_ATAC_744		chr1	42631076	42631882	SC_ATAC_744		chr1	45205061	45206182	HT_ATAC_744
		chr1	88271466	88272082	RT4_ATAC_745		chr2	37192888	37194457	SW_ATAC_745		chr1	42639530	42639931	SC_ATAC_745		chr1	45240649	45241857	HT_ATAC_745
		chr1	88526833	88527123	RT4_ATAC_746		chr7	65235082	65236196	SW_ATAC_746		chr1	42800613	42800725	SC_ATAC_746		chr1	45258761	45259658	HT_ATAC_746
		chr1	88793404	88794006	RT4_ATAC_747		chr5	141302790	141303861	SW_ATAC_747		chr1	42800811	42801352	SC_ATAC_747		chr1	45265366	45266767	HT_ATAC_747
		chr1	89149524	89150422	RT4_ATAC_748		chr3	135914202	135916142	SW_ATAC_748		chr1	42921884	42922694	SC_ATAC_748		chr1	45272696	45273887	HT_ATAC_748
		chr1	89239787	89240260	RT4_ATAC_749		chr7	92156942	92158415	SW_ATAC_749		chr1	42928513	42929224	SC_ATAC_749		chr1	45279147	45279809	HT_ATAC_749
		chr1	89356595	89357395	RT4_ATAC_750		chr6	79944089	79944682	SW_ATAC_750		chr1	43123611	43124484	SC_ATAC_750		chr1	45284985	45286451	HT_ATAC_750
		chr1	89458037	89458989	RT4_ATAC_751		chr6	132833699	132834765	SW_ATAC_751		chr1	43147742	43148129	SC_ATAC_751		chr1	45451881	45452854	HT_ATAC_751
		chr1	89464444	89464664	RT4_ATAC_752		chr2	263846	265266	SW_ATAC_752		chr1	43232260	43233417	SC_ATAC_752		chr1	45476206	45477133	HT_ATAC_752
		chr1	89488478	89488609	RT4_ATAC_753		chr3	140660268	140661850	SW_ATAC_753		chr1	43282567	43283198	SC_ATAC_753		chr1	45477684	45477976	HT_ATAC_753
		chr1	89513124	89513211	RT4_ATAC_754		chr5	90675812	90677043	SW_ATAC_754		chr1	43312006	43312665	SC_ATAC_754		chr1	45671739	45672593	HT_ATAC_754
		chr1	89591758	89591986	RT4_ATAC_755		chr18	65183199	65184551	SW_ATAC_755		chr1	43389498	43390718	SC_ATAC_755		chr1	45769187	45770224	HT_ATAC_755
		chr1	89592077	89592173	RT4_ATAC_756		chr5	90458151	90459267	SW_ATAC_756		chr1	43401983	43402561	SC_ATAC_756		chr1	45795170	45795511	HT_ATAC_756
		chr1	89920533	89920928	RT4_ATAC_757		chr5	99870468	99871980	SW_ATAC_757		chr1	43402758	43403203	SC_ATAC_757		chr1	45805197	45806366	HT_ATAC_757
		chr1	89989865	89991011	RT4_ATAC_758		chr14	65453366	65454393	SW_ATAC_758		chr1	43408896	43409279	SC_ATAC_758		chr1	45956399	45957335	HT_ATAC_758
		chr1	90013323	90013609	RT4_ATAC_759		chr3	138633716	138635107	SW_ATAC_759		chr1	43423854	43424966	SC_ATAC_759		chr1	45965237	45966195	HT_ATAC_759
		chr1	90098468	90099185	RT4_ATAC_760		chr4	122790692	122792259	SW_ATAC_760		chr1	43432802	43433271	SC_ATAC_760		chr1	45986912	45988275	HT_ATAC_760
		chr1	90228369	90228807	RT4_ATAC_761		chr7	55322339	55323741	SW_ATAC_761		chr1	43474206	43474713	SC_ATAC_761		chr1	46015956	46017132	HT_ATAC_761
		chr1	90286192	90287505	RT4_ATAC_762		chr9	107509497	107511077	SW_ATAC_762		chr1	43478299	43478571	SC_ATAC_762		chr1	46035490	46036043	HT_ATAC_762
		chr1	90308843	90309693	RT4_ATAC_763		chr7	114870770	114871576	SW_ATAC_763		chr1	43487226	43488161	SC_ATAC_763		chr1	46048972	46050842	HT_ATAC_763
		chr1	90331439	90331969	RT4_ATAC_764		chr4	107236634	107237991	SW_ATAC_764		chr1	43618403	43618866	SC_ATAC_764		chr1	46151741	46153202	HT_ATAC_764
		chr1	90355683	90356524	RT4_ATAC_765		chr1	17066397	17067915	SW_ATAC_765		chr1	43637703	43638445	SC_ATAC_765		chr1	46153735	46154172	HT_ATAC_765
		chr1	90372260	90372450	RT4_ATAC_766		chr8	59465189	59466777	SW_ATAC_766		chr1	43672307	43673041	SC_ATAC_766		chr1	46215852	46216799	HT_ATAC_766
		chr1	90460231	90461374	RT4_ATAC_767		chr2	74152854	74153456	SW_ATAC_767		chr1	43736149	43736716	SC_ATAC_767		chr1	46268501	46268752	HT_ATAC_767
		chr1	90865475	90866355	RT4_ATAC_768		chr2	176866057	176867696	SW_ATAC_768		chr1	43751033	43751615	SC_ATAC_768		chr1	46269006	46270105	HT_ATAC_768
		chr1	90868762	90869037	RT4_ATAC_769		chr20	6102694	6104403	SW_ATAC_769		chr1	43814076	43815309	SC_ATAC_769		chr1	46598006	46599312	HT_ATAC_769
		chr1	91316719	91317361	RT4_ATAC_770		chr16	53163981	53165967	SW_ATAC_770		chr1	43824092	43825100	SC_ATAC_770		chr1	46645294	46645467	HT_ATAC_770
		chr1	91486816	91488001	RT4_ATAC_771		chr18	23669674	23671440	SW_ATAC_771		chr1	43831950	43832129	SC_ATAC_771		chr1	46645919	46646274	HT_ATAC_771
		chr1	91869703	91870490	RT4_ATAC_772		chr1	89458026	89459059	SW_ATAC_772		chr1	43832564	43834300	SC_ATAC_772		chr1	46646992	46647479	HT_ATAC_772
		chr1	91966109	91966488	RT4_ATAC_773		chr20	13618853	13620151	SW_ATAC_773		chr1	43838759	43839001	SC_ATAC_773		chr1	46648817	46649215	HT_ATAC_773
		chr1	91966579	91967113	RT4_ATAC_774		chr6	126307203	126308485	SW_ATAC_774		chr1	43855093	43855856	SC_ATAC_774		chr1	46649368	46649526	HT_ATAC_774
		chr1	92076933	92077605	RT4_ATAC_775		chr16	81129375	81130658	SW_ATAC_775		chr1	43918998	43919777	SC_ATAC_775		chr1	46663482	46664256	HT_ATAC_775
		chr1	92198098	92198566	RT4_ATAC_776		chr14	39571580	39573170	SW_ATAC_776		chr1	43920164	43920673	SC_ATAC_776		chr1	46684206	46684649	HT_ATAC_776
		chr1	92211615	92211846	RT4_ATAC_777		chr12	125549390	125550780	SW_ATAC_777		chr1	44015609	44016327	SC_ATAC_777		chr1	46712676	46714308	HT_ATAC_777
		chr1	92310472	92310961	RT4_ATAC_778		chrX	77359090	77360681	SW_ATAC_778		chr1	44047583	44048414	SC_ATAC_778		chr1	46767481	46769579	HT_ATAC_778
		chr1	92316915	92317679	RT4_ATAC_779		chr6	97345205	97346564	SW_ATAC_779		chr1	44115192	44116279	SC_ATAC_779		chr1	46805742	46805913	HT_ATAC_779
		chr1	92329910	92330074	RT4_ATAC_780		chr6	72199038	72200685	SW_ATAC_780		chr1	44132054	44132741	SC_ATAC_780		chr1	46806077	46806910	HT_ATAC_780
		chr1	92338091	92338593	RT4_ATAC_781		chr3	42002781	42004160	SW_ATAC_781		chr1	44172967	44173278	SC_ATAC_781		chr1	46813810	46814078	HT_ATAC_781
		chr1	92351153	92352017	RT4_ATAC_782		chr2	3605123	3606597	SW_ATAC_782		chr1	44249142	44249832	SC_ATAC_782		chr1	46859681	46860787	HT_ATAC_782
		chr1	92355678	92355916	RT4_ATAC_783		chr19	30155815	30156814	SW_ATAC_783		chr1	44287791	44287976	SC_ATAC_783		chr1	46867445	46868065	HT_ATAC_783
		chr1	92545741	92546572	RT4_ATAC_784		chr4	123653267	123654809	SW_ATAC_784		chr1	44300036	44300522	SC_ATAC_784		chr1	47069328	47070203	HT_ATAC_784
		chr1	92756640	92757196	RT4_ATAC_785		chr18	5237117	5238829	SW_ATAC_785		chr1	44323747	44324586	SC_ATAC_785		chr1	47077421	47077919	HT_ATAC_785
		chr1	92764096	92765079	RT4_ATAC_786		chr3	132135729	132137294	SW_ATAC_786		chr1	44350698	44351608	SC_ATAC_786		chr1	47079618	47079866	HT_ATAC_786
		chr1	92907455	92907851	RT4_ATAC_787		chr3	33758358	33760417	SW_ATAC_787		chr1	44378201	44378655	SC_ATAC_787		chr1	47082082	47082678	HT_ATAC_787
		chr1	92951467	92951618	RT4_ATAC_788		chr3	38206173	38207792	SW_ATAC_788		chr1	44399058	44400127	SC_ATAC_788		chr1	47133282	47134410	HT_ATAC_788
		chr1	93250204	93251224	RT4_ATAC_789		chr8	17103735	17105474	SW_ATAC_789		chr1	44411851	44412886	SC_ATAC_789		chr1	47184224	47185259	HT_ATAC_789
		chr1	93297388	93298291	RT4_ATAC_790		chr12	11323627	11324412	SW_ATAC_790		chr1	44435425	44435754	SC_ATAC_790		chr1	47222970	47224101	HT_ATAC_790
		chr1	93426029	93426179	RT4_ATAC_791		chr20	30466996	30468248	SW_ATAC_791		chr1	44440000	44440711	SC_ATAC_791		chr1	47573520	47574119	HT_ATAC_791
		chr1	93426492	93427576	RT4_ATAC_792		chr9	72873125	72874578	SW_ATAC_792		chr1	44456614	44457905	SC_ATAC_792		chr1	47644825	47645459	HT_ATAC_792
		chr1	93527850	93528083	RT4_ATAC_793		chr6	160210173	160212001	SW_ATAC_793		chr1	44495345	44496638	SC_ATAC_793		chr1	47745893	47746136	HT_ATAC_793
		chr1	93544396	93544939	RT4_ATAC_794		chr3	160116698	160118247	SW_ATAC_794		chr1	44678939	44679404	SC_ATAC_794		chr1	47778928	47780226	HT_ATAC_794
		chr1	93546076	93546199	RT4_ATAC_795		chr16	83986346	83987509	SW_ATAC_795		chr1	44793264	44794187	SC_ATAC_795		chr1	47780391	47780702	HT_ATAC_795
		chr1	93645222	93646373	RT4_ATAC_796		chr5	10353059	10354619	SW_ATAC_796		chr1	44820679	44821395	SC_ATAC_796		chr1	47799083	47800482	HT_ATAC_796
		chr1	93790153	93790924	RT4_ATAC_797		chr14	31090396	31092072	SW_ATAC_797		chr1	45097134	45098193	SC_ATAC_797		chr1	47854513	47854897	HT_ATAC_797
		chr1	93811122	93811768	RT4_ATAC_798		chr14	55368515	55370173	SW_ATAC_798		chr1	45139706	45140472	SC_ATAC_798		chr1	47874830	47875697	HT_ATAC_798
		chr1	93913976	93914490	RT4_ATAC_799		chr4	148604364	148606309	SW_ATAC_799		chr1	45187045	45187644	SC_ATAC_799		chr1	47889787	47890436	HT_ATAC_799
		chr1	94063291	94063633	RT4_ATAC_800		chr11	107879418	107880680	SW_ATAC_800		chr1	45187744	45187998	SC_ATAC_800		chr1	47902016	47903804	HT_ATAC_800
		chr1	94146341	94147602	RT4_ATAC_801		chr1	100502786	100504815	SW_ATAC_801		chr1	45196246	45197207	SC_ATAC_801		chr1	48035514	48035988	HT_ATAC_801
		chr1	94158526	94159139	RT4_ATAC_802		chr4	20701582	20702930	SW_ATAC_802		chr1	45205253	45205543	SC_ATAC_802		chr1	48175334	48175821	HT_ATAC_802
		chr1	94167222	94167619	RT4_ATAC_803		chr8	71314027	71316833	SW_ATAC_803		chr1	45240664	45241652	SC_ATAC_803		chr1	48176253	48176629	HT_ATAC_803
		chr1	94224530	94225072	RT4_ATAC_804		chr5	96518072	96519932	SW_ATAC_804		chr1	45249763	45250711	SC_ATAC_804		chr1	48192042	48192205	HT_ATAC_804
		chr1	94240552	94241080	RT4_ATAC_805		chr1	208357343	208358497	SW_ATAC_805		chr1	45265410	45266280	SC_ATAC_805		chr1	48462759	48463710	HT_ATAC_805
		chr1	94311549	94313240	RT4_ATAC_806		chr6	116574379	116575706	SW_ATAC_806		chr1	45272674	45273286	SC_ATAC_806		chr1	48559424	48560041	HT_ATAC_806
		chr1	94344446	94344921	RT4_ATAC_807		chr4	87514879	87516473	SW_ATAC_807		chr1	45273377	45273685	SC_ATAC_807		chr1	48667924	48668305	HT_ATAC_807
		chr1	94369354	94369564	RT4_ATAC_808		chr1	246771814	246773155	SW_ATAC_808		chr1	45285216	45286187	SC_ATAC_808		chr1	48669078	48669234	HT_ATAC_808
		chr1	94374657	94375391	RT4_ATAC_809		chr1	110880823	110882743	SW_ATAC_809		chr1	45451822	45452593	SC_ATAC_809		chr1	48893905	48894116	HT_ATAC_809
		chr1	94430172	94431155	RT4_ATAC_810		chr7	64838507	64839361	SW_ATAC_810		chr1	45476781	45477127	SC_ATAC_810		chr1	48937304	48938541	HT_ATAC_810
		chr1	94503073	94503605	RT4_ATAC_811		chr20	52683826	52684675	SW_ATAC_811		chr1	45477697	45478104	SC_ATAC_811		chr1	48963843	48964045	HT_ATAC_811
		chr1	94527089	94527272	RT4_ATAC_812		chr11	107728513	107730606	SW_ATAC_812		chr1	45769180	45770058	SC_ATAC_812		chr1	48964207	48964608	HT_ATAC_812
		chr1	94533835	94534019	RT4_ATAC_813		chr5	80596463	80597926	SW_ATAC_813		chr1	45805310	45806374	SC_ATAC_813		chr1	49143077	49143280	HT_ATAC_813
		chr1	94534589	94534813	RT4_ATAC_814		chr1	78147820	78149621	SW_ATAC_814		chr1	45956385	45957354	SC_ATAC_814		chr1	50482835	50483019	HT_ATAC_814
		chr1	94702388	94703361	RT4_ATAC_815		chr7	80571488	80572525	SW_ATAC_815		chr1	45965243	45966190	SC_ATAC_815		chr1	50488982	50489149	HT_ATAC_815
		chr1	94712827	94713490	RT4_ATAC_816		chr12	72233069	72234590	SW_ATAC_816		chr1	45987086	45988268	SC_ATAC_816		chr1	50489304	50489885	HT_ATAC_816
		chr1	94791178	94791715	RT4_ATAC_817		chr4	44679913	44681405	SW_ATAC_817		chr1	46016168	46016966	SC_ATAC_817		chr1	50798591	50799696	HT_ATAC_817
		chr1	94801459	94801707	RT4_ATAC_818		chr18	66381592	66382795	SW_ATAC_818		chr1	46049023	46049777	SC_ATAC_818		chr1	50834012	50834295	HT_ATAC_818
		chr1	94849697	94849963	RT4_ATAC_819		chr2	75873368	75874815	SW_ATAC_819		chr1	46050087	46050840	SC_ATAC_819		chr1	50837181	50837717	HT_ATAC_819
		chr1	94850153	94850884	RT4_ATAC_820		chr9	74979348	74981035	SW_ATAC_820		chr1	46152134	46153227	SC_ATAC_820		chr1	51069135	51069952	HT_ATAC_820
		chr1	94883458	94884464	RT4_ATAC_821		chr1	92763833	92765117	SW_ATAC_821		chr1	46215821	46216799	SC_ATAC_821		chr1	51070241	51070508	HT_ATAC_821
		chr1	95006933	95007671	RT4_ATAC_822		chr14	21571732	21572903	SW_ATAC_822		chr1	46268491	46268752	SC_ATAC_822		chr1	51086496	51086981	HT_ATAC_822
		chr1	95028559	95029094	RT4_ATAC_823		chr7	66119117	66120401	SW_ATAC_823		chr1	46269020	46269882	SC_ATAC_823		chr1	51425310	51426481	HT_ATAC_823
		chr1	95285707	95286306	RT4_ATAC_824		chr7	65958206	65959184	SW_ATAC_824		chr1	46598111	46598892	SC_ATAC_824		chr1	51433754	51434420	HT_ATAC_824
		chr1	95288734	95289039	RT4_ATAC_825		chr11	93517021	93518448	SW_ATAC_825		chr1	46598980	46599129	SC_ATAC_825		chr1	51434649	51435961	HT_ATAC_825
		chr1	95320018	95320780	RT4_ATAC_826		chr7	55141372	55142265	SW_ATAC_826		chr1	46645308	46645472	SC_ATAC_826		chr1	51443367	51444114	HT_ATAC_826
		chr1	95329565	95329850	RT4_ATAC_827		chr5	110062055	110063062	SW_ATAC_827		chr1	46645780	46646351	SC_ATAC_827		chr1	51537563	51538042	HT_ATAC_827
		chr1	95391919	95393200	RT4_ATAC_828		chr6	99968736	99969880	SW_ATAC_828		chr1	46648822	46649536	SC_ATAC_828		chr1	51701391	51702963	HT_ATAC_828
		chr1	95428034	95429039	RT4_ATAC_829		chr5	89769084	89771150	SW_ATAC_829		chr1	46663619	46664632	SC_ATAC_829		chr1	51761893	51762975	HT_ATAC_829
		chr1	95473337	95473578	RT4_ATAC_830		chr7	32996729	32997921	SW_ATAC_830		chr1	46684139	46684713	SC_ATAC_830		chr1	51796204	51796507	HT_ATAC_830
		chr1	95509027	95509167	RT4_ATAC_831		chr8	119632816	119634929	SW_ATAC_831		chr1	46712701	46713478	SC_ATAC_831		chr1	51797020	51797150	HT_ATAC_831
		chr1	95538113	95538627	RT4_ATAC_832		chr8	33341797	33343597	SW_ATAC_832		chr1	46767531	46768083	SC_ATAC_832		chr1	51810314	51810872	HT_ATAC_832
		chr1	95550016	95550508	RT4_ATAC_833		chr7	66146353	66148009	SW_ATAC_833		chr1	46768247	46768611	SC_ATAC_833		chr1	51876711	51877074	HT_ATAC_833
		chr1	95561222	95562044	RT4_ATAC_834		chr1	220218538	220220198	SW_ATAC_834		chr1	46768704	46769100	SC_ATAC_834		chr1	51984269	51985247	HT_ATAC_834
		chr1	95582310	95583437	RT4_ATAC_835		chr1	68150571	68152681	SW_ATAC_835		chr1	46769209	46769439	SC_ATAC_835		chr1	52023808	52024812	HT_ATAC_835
		chr1	95699290	95700155	RT4_ATAC_836		chr14	65568373	65570365	SW_ATAC_836		chr1	46805307	46805421	SC_ATAC_836		chr1	52035054	52036315	HT_ATAC_836
		chr1	96573653	96574009	RT4_ATAC_837		chr8	141319411	141320547	SW_ATAC_837		chr1	46806268	46806828	SC_ATAC_837		chr1	52082565	52083754	HT_ATAC_837
		chr1	96828134	96828708	RT4_ATAC_838		chr14	77923467	77925181	SW_ATAC_838		chr1	46813855	46814041	SC_ATAC_838		chr1	52087813	52088623	HT_ATAC_838
		chr1	97186921	97188062	RT4_ATAC_839		chr13	50509629	50511391	SW_ATAC_839		chr1	46867362	46868199	SC_ATAC_839		chr1	52102580	52103118	HT_ATAC_839
		chr1	97310941	97311489	RT4_ATAC_840		chr20	7999538	8000704	SW_ATAC_840		chr1	46954929	46955530	SC_ATAC_840		chr1	52126787	52127216	HT_ATAC_840
		chr1	97432203	97432369	RT4_ATAC_841		chr2	55130907	55132391	SW_ATAC_841		chr1	46982316	46983286	SC_ATAC_841		chr1	52194483	52195895	HT_ATAC_841
		chr1	97603928	97604131	RT4_ATAC_842		chr1	109234214	109236255	SW_ATAC_842		chr1	46998611	46999359	SC_ATAC_842		chr1	52226396	52227042	HT_ATAC_842
		chr1	97658272	97659148	RT4_ATAC_843		chr14	24615702	24617167	SW_ATAC_843		chr1	47069297	47070222	SC_ATAC_843		chr1	52234463	52234882	HT_ATAC_843
		chr1	97743292	97743802	RT4_ATAC_844		chr5	34007372	34008675	SW_ATAC_844		chr1	47077375	47077918	SC_ATAC_844		chr1	52343609	52345113	HT_ATAC_844
		chr1	97743891	97744040	RT4_ATAC_845		chr1	214776153	214777631	SW_ATAC_845		chr1	47082076	47082707	SC_ATAC_845		chr1	52363166	52363625	HT_ATAC_845
		chr1	98385987	98387156	RT4_ATAC_846		chr15	89877482	89879046	SW_ATAC_846		chr1	47133441	47134494	SC_ATAC_846		chr1	52456082	52456777	HT_ATAC_846
		chr1	98454662	98454935	RT4_ATAC_847		chr5	122847028	122848555	SW_ATAC_847		chr1	47184512	47185277	SC_ATAC_847		chr1	52468047	52468268	HT_ATAC_847
		chr1	98519456	98519984	RT4_ATAC_848		chr7	89975008	89976478	SW_ATAC_848		chr1	47222991	47223948	SC_ATAC_848		chr1	52498223	52499730	HT_ATAC_848
		chr1	98789068	98789923	RT4_ATAC_849		chr18	48404698	48406202	SW_ATAC_849		chr1	47323164	47323693	SC_ATAC_849		chr1	52520595	52521472	HT_ATAC_849
		chr1	99126852	99128089	RT4_ATAC_850		chr1	217803739	217805233	SW_ATAC_850		chr1	47573364	47574299	SC_ATAC_850		chr1	52521631	52522626	HT_ATAC_850
		chr1	99205135	99205717	RT4_ATAC_851		chr4	174290653	174292609	SW_ATAC_851		chr1	47644796	47645502	SC_ATAC_851		chr1	52607434	52608720	HT_ATAC_851
		chr1	99259897	99260114	RT4_ATAC_852		chr6	100940744	100942176	SW_ATAC_852		chr1	47655340	47656346	SC_ATAC_852		chr1	52625163	52625551	HT_ATAC_852
		chr1	99386051	99386579	RT4_ATAC_853		chr12	31881342	31882475	SW_ATAC_853		chr1	47779548	47780234	SC_ATAC_853		chr1	52830783	52831181	HT_ATAC_853
		chr1	99387439	99387849	RT4_ATAC_854		chr15	28833798	28834809	SW_ATAC_854		chr1	47780391	47780651	SC_ATAC_854		chr1	52831377	52832458	HT_ATAC_854
		chr1	99729612	99730561	RT4_ATAC_855		chr4	141444814	141445988	SW_ATAC_855		chr1	47791228	47791646	SC_ATAC_855		chr1	52869373	52870830	HT_ATAC_855
		chr1	99912517	99912640	RT4_ATAC_856		chr4	126235843	126237399	SW_ATAC_856		chr1	47799167	47799729	SC_ATAC_856		chr1	53017873	53019487	HT_ATAC_856
		chr1	99922971	99923806	RT4_ATAC_857		chr3	121552991	121554694	SW_ATAC_857		chr1	47799820	47800529	SC_ATAC_857		chr1	53163286	53164362	HT_ATAC_857
		chr1	100045904	100046452	RT4_ATAC_858		chr2	183988438	183989892	SW_ATAC_858		chr1	47902216	47902401	SC_ATAC_858		chr1	53168659	53169398	HT_ATAC_858
		chr1	100110855	100112197	RT4_ATAC_859		chr7	143317277	143318907	SW_ATAC_859		chr1	47902509	47903906	SC_ATAC_859		chr1	53191778	53192551	HT_ATAC_859
		chr1	100124967	100125724	RT4_ATAC_860		chr9	84303238	84305318	SW_ATAC_860		chr1	48027154	48027810	SC_ATAC_860		chr1	53308108	53309880	HT_ATAC_860
		chr1	100231918	100232340	RT4_ATAC_861		chr5	154061932	154062904	SW_ATAC_861		chr1	48035361	48036005	SC_ATAC_861		chr1	53386491	53386592	HT_ATAC_861
		chr1	100274308	100274526	RT4_ATAC_862		chr20	42085562	42087358	SW_ATAC_862		chr1	48192039	48192205	SC_ATAC_862		chr1	53386747	53387784	HT_ATAC_862
		chr1	100280030	100280430	RT4_ATAC_863		chr11	57479051	57480374	SW_ATAC_863		chr1	48360372	48360889	SC_ATAC_863		chr1	53392619	53393946	HT_ATAC_863
		chr1	100315330	100316247	RT4_ATAC_864		chr3	107241436	107243017	SW_ATAC_864		chr1	48463179	48463557	SC_ATAC_864		chr1	53462768	53462853	HT_ATAC_864
		chr1	100435139	100436234	RT4_ATAC_865		chr6	119669690	119672362	SW_ATAC_865		chr1	48484512	48484896	SC_ATAC_865		chr1	53480312	53481245	HT_ATAC_865
		chr1	100503499	100504516	RT4_ATAC_866		chr6	64345301	64346901	SW_ATAC_866		chr1	48559446	48560035	SC_ATAC_866		chr1	53661948	53663244	HT_ATAC_866
		chr1	100598058	100599016	RT4_ATAC_867		chr7	149569878	149571515	SW_ATAC_867		chr1	48702630	48702779	SC_ATAC_867		chr1	53685843	53686842	HT_ATAC_867
		chr1	100715057	100715614	RT4_ATAC_868		chr2	122287492	122289720	SW_ATAC_868		chr1	48937379	48938329	SC_ATAC_868		chr1	53703889	53704929	HT_ATAC_868
		chr1	100731587	100732361	RT4_ATAC_869		chr7	117823286	117824888	SW_ATAC_869		chr1	48963860	48964046	SC_ATAC_869		chr1	53738593	53739642	HT_ATAC_869
		chr1	100790867	100790998	RT4_ATAC_870		chr7	8007653	8009142	SW_ATAC_870		chr1	49341828	49342370	SC_ATAC_870		chr1	53791522	53793021	HT_ATAC_870
		chr1	100791101	100791327	RT4_ATAC_871		chr2	208393680	208395182	SW_ATAC_871		chr1	49344237	49344599	SC_ATAC_871		chr1	54204487	54205407	HT_ATAC_871
		chr1	100816831	100817042	RT4_ATAC_872		chr14	78266208	78267190	SW_ATAC_872		chr1	50814275	50814638	SC_ATAC_872		chr1	54302760	54304417	HT_ATAC_872
		chr1	100817127	100817400	RT4_ATAC_873		chr14	37130838	37132605	SW_ATAC_873		chr1	50888435	50889716	SC_ATAC_873		chr1	54355016	54356201	HT_ATAC_873
		chr1	100817708	100818146	RT4_ATAC_874		chr2	120124222	120125457	SW_ATAC_874		chr1	50895834	50896496	SC_ATAC_874		chr1	54372942	54373357	HT_ATAC_874
		chr1	100818239	100818343	RT4_ATAC_875		chr6	71997700	71999161	SW_ATAC_875		chr1	51069309	51069947	SC_ATAC_875		chr1	54410616	54412327	HT_ATAC_875
		chr1	100880200	100880807	RT4_ATAC_876		chr2	25015486	25017152	SW_ATAC_876		chr1	51086378	51087013	SC_ATAC_876		chr1	54422331	54423342	HT_ATAC_876
		chr1	100895897	100896246	RT4_ATAC_877		chr14	45603139	45604155	SW_ATAC_877		chr1	51171373	51171862	SC_ATAC_877		chr1	54481738	54482564	HT_ATAC_877
		chr1	100918263	100918607	RT4_ATAC_878		chr1	120837754	120839073	SW_ATAC_878		chr1	51424987	51426472	SC_ATAC_878		chr1	54518070	54519761	HT_ATAC_878
		chr1	100925121	100925363	RT4_ATAC_879		chr4	128702535	128704840	SW_ATAC_879		chr1	51433764	51434420	SC_ATAC_879		chr1	54633311	54633902	HT_ATAC_879
		chr1	101349424	101349837	RT4_ATAC_880		chr11	130902473	130903664	SW_ATAC_880		chr1	51435618	51435980	SC_ATAC_880		chr1	54665183	54666745	HT_ATAC_880
		chr1	101349928	101350088	RT4_ATAC_881		chr12	80327747	80329993	SW_ATAC_881		chr1	51442530	51443170	SC_ATAC_881		chr1	54789127	54789466	HT_ATAC_881
		chr1	101360298	101360816	RT4_ATAC_882		chr1	180136981	180137662	SW_ATAC_882		chr1	51443306	51443815	SC_ATAC_882		chr1	54872029	54873086	HT_ATAC_882
		chr1	101360944	101361043	RT4_ATAC_883		chr2	47596007	47597320	SW_ATAC_883		chr1	51536277	51536673	SC_ATAC_883		chr1	54953798	54954630	HT_ATAC_883
		chr1	101361207	101361789	RT4_ATAC_884		chr7	21984974	21986198	SW_ATAC_884		chr1	51655212	51655357	SC_ATAC_884		chr1	54954915	54955506	HT_ATAC_884
		chr1	101361924	101362478	RT4_ATAC_885		chr11	96122336	96123877	SW_ATAC_885		chr1	51701645	51702617	SC_ATAC_885		chr1	55007693	55008773	HT_ATAC_885
		chr1	101490842	101491199	RT4_ATAC_886		chr6	116600095	116601382	SW_ATAC_886		chr1	51779582	51780620	SC_ATAC_886		chr1	55029980	55030505	HT_ATAC_886
		chr1	101491284	101491938	RT4_ATAC_887		chr10	22291441	22292906	SW_ATAC_887		chr1	51780714	51780875	SC_ATAC_887		chr1	55181155	55181850	HT_ATAC_887
		chr1	101701206	101701372	RT4_ATAC_888		chr4	108910313	108912258	SW_ATAC_888		chr1	51810230	51810877	SC_ATAC_888		chr1	55229616	55230810	HT_ATAC_888
		chr1	101701474	101701591	RT4_ATAC_889		chr12	72056656	72058453	SW_ATAC_889		chr1	51950340	51950733	SC_ATAC_889		chr1	55266405	55267386	HT_ATAC_889
		chr1	101754082	101754445	RT4_ATAC_890		chr15	25683029	25684829	SW_ATAC_890		chr1	51983653	51985182	SC_ATAC_890		chr1	55352101	55353670	HT_ATAC_890
		chr1	101760696	101761128	RT4_ATAC_891		chr6	90538608	90540062	SW_ATAC_891		chr1	52035039	52035970	SC_ATAC_891		chr1	55416091	55416621	HT_ATAC_891
		chr1	101822811	101823246	RT4_ATAC_892		chr3	105084980	105085844	SW_ATAC_892		chr1	52082587	52083391	SC_ATAC_892		chr1	55487562	55488040	HT_ATAC_892
		chr1	101985867	101986271	RT4_ATAC_893		chr7	32534545	32536010	SW_ATAC_893		chr1	52088002	52088531	SC_ATAC_893		chr1	55504968	55506273	HT_ATAC_893
		chr1	102033233	102033429	RT4_ATAC_894		chr20	18487628	18488861	SW_ATAC_894		chr1	52102770	52103103	SC_ATAC_894		chr1	55537276	55537366	HT_ATAC_894
		chr1	102555146	102555324	RT4_ATAC_895		chr4	17578261	17580481	SW_ATAC_895		chr1	52126774	52127317	SC_ATAC_895		chr1	55609345	55609652	HT_ATAC_895
		chr1	103093892	103094161	RT4_ATAC_896		chr5	2780085	2781291	SW_ATAC_896		chr1	52194770	52195912	SC_ATAC_896		chr1	55680346	55681616	HT_ATAC_896
		chr1	103362926	103363357	RT4_ATAC_897		chr1	100315074	100316523	SW_ATAC_897		chr1	52344129	52344997	SC_ATAC_897		chr1	55701300	55701693	HT_ATAC_897
		chr1	103664693	103664933	RT4_ATAC_898		chr14	30692415	30693450	SW_ATAC_898		chr1	52363156	52363638	SC_ATAC_898		chr1	55711120	55712420	HT_ATAC_898
		chr1	104067823	104068148	RT4_ATAC_899		chr12	88428815	88430636	SW_ATAC_899		chr1	52456120	52456506	SC_ATAC_899		chr1	55728460	55728990	HT_ATAC_899
		chr1	104068258	104069118	RT4_ATAC_900		chr7	44645712	44647058	SW_ATAC_900		chr1	52498041	52499561	SC_ATAC_900		chr1	55894545	55895732	HT_ATAC_900
		chr1	104674904	104675438	RT4_ATAC_901		chr7	16886309	16887556	SW_ATAC_901		chr1	52520381	52521182	SC_ATAC_901		chr1	56184663	56184970	HT_ATAC_901
		chr1	105005710	105006319	RT4_ATAC_902		chr3	31573261	31575265	SW_ATAC_902		chr1	52521749	52522396	SC_ATAC_902		chr1	56382017	56382838	HT_ATAC_902
		chr1	107540920	107541622	RT4_ATAC_903		chr3	8542988	8543661	SW_ATAC_903		chr1	52607555	52607861	SC_ATAC_903		chr1	56982610	56983690	HT_ATAC_903
		chr1	107599157	107600245	RT4_ATAC_904		chr3	123303221	123304686	SW_ATAC_904		chr1	52607950	52608699	SC_ATAC_904		chr1	56999045	56999905	HT_ATAC_904
		chr1	107684599	107684734	RT4_ATAC_905		chr13	31735459	31736981	SW_ATAC_905		chr1	52831380	52832284	SC_ATAC_905		chr1	57013272	57013886	HT_ATAC_905
		chr1	107684819	107685001	RT4_ATAC_906		chr11	115373554	115375859	SW_ATAC_906		chr1	52869380	52870378	SC_ATAC_906		chr1	57043972	57045496	HT_ATAC_906
		chr1	107973189	107973568	RT4_ATAC_907		chr3	135626353	135627585	SW_ATAC_907		chr1	52870472	52870672	SC_ATAC_907		chr1	57110373	57111782	HT_ATAC_907
		chr1	108078820	108079224	RT4_ATAC_908		chr7	18547975	18549524	SW_ATAC_908		chr1	53018268	53019483	SC_ATAC_908		chr1	57153759	57154920	HT_ATAC_908
		chr1	108115314	108115518	RT4_ATAC_909		chr1	74058533	74059966	SW_ATAC_909		chr1	53128334	53128842	SC_ATAC_909		chr1	57239883	57240123	HT_ATAC_909
		chr1	108136118	108136973	RT4_ATAC_910		chr7	127031582	127033405	SW_ATAC_910		chr1	53163516	53164361	SC_ATAC_910		chr1	58898408	58898962	HT_ATAC_910
		chr1	108168952	108169771	RT4_ATAC_911		chr2	169067441	169068942	SW_ATAC_911		chr1	53168632	53169352	SC_ATAC_911		chr1	58913204	58913906	HT_ATAC_911
		chr1	108220377	108220589	RT4_ATAC_912		chr5	145582531	145583687	SW_ATAC_912		chr1	53191956	53192601	SC_ATAC_912		chr1	59011573	59012690	HT_ATAC_912
		chr1	108231074	108231338	RT4_ATAC_913		chr13	53029137	53030199	SW_ATAC_913		chr1	53326340	53326507	SC_ATAC_913		chr1	59038452	59038628	HT_ATAC_913
		chr1	108668245	108668441	RT4_ATAC_914		chr9	103501522	103502919	SW_ATAC_914		chr1	53387053	53387760	SC_ATAC_914		chr1	59042034	59043446	HT_ATAC_914
		chr1	108742363	108743330	RT4_ATAC_915		chr2	3383213	3384238	SW_ATAC_915		chr1	53392662	53393965	SC_ATAC_915		chr1	59049823	59050765	HT_ATAC_915
		chr1	108743474	108743674	RT4_ATAC_916		chr4	48781048	48782725	SW_ATAC_916		chr1	53480476	53480713	SC_ATAC_916		chr1	59057888	59058918	HT_ATAC_916
		chr1	109001022	109001667	RT4_ATAC_917		chr3	156543307	156544837	SW_ATAC_917		chr1	53611611	53612491	SC_ATAC_917		chr1	59083931	59084458	HT_ATAC_917
		chr1	109102409	109102718	RT4_ATAC_918		chr6	57181351	57182745	SW_ATAC_918		chr1	53661941	53663264	SC_ATAC_918		chr1	59094478	59095122	HT_ATAC_918
		chr1	109102880	109103020	RT4_ATAC_919		chr8	90769342	90770965	SW_ATAC_919		chr1	53685839	53686642	SC_ATAC_919		chr1	59118150	59118549	HT_ATAC_919
		chr1	109104440	109104614	RT4_ATAC_920		chr3	20226844	20228481	SW_ATAC_920		chr1	53704114	53704704	SC_ATAC_920		chr1	59164901	59166060	HT_ATAC_920
		chr1	109112846	109113020	RT4_ATAC_921		chr1	62901567	62903390	SW_ATAC_921		chr1	53739309	53739612	SC_ATAC_921		chr1	59192922	59193506	HT_ATAC_921
		chr1	109203434	109204328	RT4_ATAC_922		chr2	87302968	87304496	SW_ATAC_922		chr1	53791458	53792556	SC_ATAC_922		chr1	59220623	59220740	HT_ATAC_922
		chr1	109234370	109235471	RT4_ATAC_923		chr3	97690174	97691602	SW_ATAC_923		chr1	53974740	53975401	SC_ATAC_923		chr1	59220927	59221489	HT_ATAC_923
		chr1	109235588	109235782	RT4_ATAC_924		chr4	47915841	47917139	SW_ATAC_924		chr1	54037854	54038846	SC_ATAC_924		chr1	59248908	59250529	HT_ATAC_924
		chr1	109289034	109289772	RT4_ATAC_925		chr5	43602504	43604276	SW_ATAC_925		chr1	54204871	54205269	SC_ATAC_925		chr1	59250679	59251345	HT_ATAC_925
		chr1	109289950	109290153	RT4_ATAC_926		chr8	66753615	66754978	SW_ATAC_926		chr1	54303602	54304407	SC_ATAC_926		chr1	59274535	59276016	HT_ATAC_926
		chr1	109419441	109420089	RT4_ATAC_927		chr6	117002062	117003790	SW_ATAC_927		chr1	54355139	54355700	SC_ATAC_927		chr1	59279929	59281332	HT_ATAC_927
		chr1	109505395	109505502	RT4_ATAC_928		chr12	28342905	28344485	SW_ATAC_928		chr1	54411010	54412303	SC_ATAC_928		chr1	59281490	59282284	HT_ATAC_928
		chr1	109505656	109506215	RT4_ATAC_929		chr2	55746069	55747883	SW_ATAC_929		chr1	54422593	54423348	SC_ATAC_929		chr1	59314272	59315108	HT_ATAC_929
		chr1	109583986	109585141	RT4_ATAC_930		chr14	53683891	53685120	SW_ATAC_930		chr1	54481714	54482573	SC_ATAC_930		chr1	59368936	59369941	HT_ATAC_930
		chr1	109592842	109593227	RT4_ATAC_931		chr7	65540398	65541530	SW_ATAC_931		chr1	54518631	54519771	SC_ATAC_931		chr1	59395269	59395653	HT_ATAC_931
		chr1	109618542	109618944	RT4_ATAC_932		chr1	160990444	160991401	SW_ATAC_932		chr1	54547412	54547589	SC_ATAC_932		chr1	59398540	59399029	HT_ATAC_932
		chr1	109633022	109633883	RT4_ATAC_933		chr8	16375092	16376337	SW_ATAC_933		chr1	54633257	54633890	SC_ATAC_933		chr1	59509364	59509892	HT_ATAC_933
		chr1	109642534	109643379	RT4_ATAC_934		chr3	137833834	137834820	SW_ATAC_934		chr1	54665436	54665523	SC_ATAC_934		chr1	59522911	59523565	HT_ATAC_934
		chr1	109655313	109655556	RT4_ATAC_935		chr11	114270333	114271823	SW_ATAC_935		chr1	54665616	54666135	SC_ATAC_935		chr1	59557578	59558294	HT_ATAC_935
		chr1	109756136	109757241	RT4_ATAC_936		chr8	67524644	67526479	SW_ATAC_936		chr1	54719238	54719610	SC_ATAC_936		chr1	59566783	59566996	HT_ATAC_936
		chr1	109805897	109806573	RT4_ATAC_937		chr2	48132533	48134350	SW_ATAC_937		chr1	54788939	54789686	SC_ATAC_937		chr1	59604922	59605410	HT_ATAC_937
		chr1	109825491	109826433	RT4_ATAC_938		chr7	72649113	72650291	SW_ATAC_938		chr1	54872029	54872257	SC_ATAC_938		chr1	59608782	59609302	HT_ATAC_938
		chr1	109940232	109941033	RT4_ATAC_939		chr1	246329202	246330424	SW_ATAC_939		chr1	54872514	54872822	SC_ATAC_939		chr1	59616275	59617516	HT_ATAC_939
		chr1	109968454	109969550	RT4_ATAC_940		chr21	18884604	18886353	SW_ATAC_940		chr1	54873701	54874209	SC_ATAC_940		chr1	59745369	59746289	HT_ATAC_940
		chr1	110026313	110026944	RT4_ATAC_941		chr2	61765198	61766554	SW_ATAC_941		chr1	54953927	54954410	SC_ATAC_941		chr1	59761761	59763490	HT_ATAC_941
		chr1	110036508	110036996	RT4_ATAC_942		chr7	150075919	150077260	SW_ATAC_942		chr1	54954721	54955339	SC_ATAC_942		chr1	59795150	59795594	HT_ATAC_942
		chr1	110091065	110091379	RT4_ATAC_943		chr1	167522293	167523435	SW_ATAC_943		chr1	54964844	54965743	SC_ATAC_943		chr1	59840879	59841572	HT_ATAC_943
		chr1	110091468	110091715	RT4_ATAC_944		chr11	124952504	124954124	SW_ATAC_944		chr1	55007583	55008744	SC_ATAC_944		chr1	59892538	59893414	HT_ATAC_944
		chr1	110186023	110186214	RT4_ATAC_945		chr1	224370078	224371694	SW_ATAC_945		chr1	55029753	55030635	SC_ATAC_945		chr1	59910618	59911036	HT_ATAC_945
		chr1	110198256	110198969	RT4_ATAC_946		chr5	130499947	130501169	SW_ATAC_946		chr1	55046976	55047946	SC_ATAC_946		chr1	59952744	59952817	HT_ATAC_946
		chr1	110282730	110283131	RT4_ATAC_947		chr3	112279972	112281477	SW_ATAC_947		chr1	55080967	55081854	SC_ATAC_947		chr1	59952967	59953776	HT_ATAC_947
		chr1	110527119	110527930	RT4_ATAC_948		chr2	159312811	159314867	SW_ATAC_948		chr1	55181155	55181938	SC_ATAC_948		chr1	60138584	60139904	HT_ATAC_948
		chr1	110577074	110577501	RT4_ATAC_949		chr2	55277360	55278120	SW_ATAC_949		chr1	55229927	55230579	SC_ATAC_949		chr1	60224990	60225424	HT_ATAC_949
		chr1	110577590	110577967	RT4_ATAC_950		chr3	181568219	181569453	SW_ATAC_950		chr1	55260144	55261080	SC_ATAC_950		chr1	60279958	60281394	HT_ATAC_950
		chr1	110880822	110882124	RT4_ATAC_951		chr2	9562436	9564390	SW_ATAC_951		chr1	55266342	55267397	SC_ATAC_951		chr1	60381161	60381501	HT_ATAC_951
		chr1	110950185	110950669	RT4_ATAC_952		chr19	33667158	33668911	SW_ATAC_952		chr1	55316364	55316791	SC_ATAC_952		chr1	60392055	60393148	HT_ATAC_952
		chr1	111019796	111020085	RT4_ATAC_953		chr4	18022384	18024525	SW_ATAC_953		chr1	55352422	55353487	SC_ATAC_953		chr1	60412908	60413481	HT_ATAC_953
		chr1	111506430	111506932	RT4_ATAC_954		chr12	79940709	79942352	SW_ATAC_954		chr1	55388406	55389181	SC_ATAC_954		chr1	60437009	60437506	HT_ATAC_954
		chr1	111682219	111683397	RT4_ATAC_955		chr3	134092317	134094326	SW_ATAC_955		chr1	55410900	55411060	SC_ATAC_955		chr1	60747151	60747708	HT_ATAC_955
		chr1	111765571	111765766	RT4_ATAC_956		chr6	146284536	146286009	SW_ATAC_956		chr1	55436382	55437437	SC_ATAC_956		chr1	61034732	61035264	HT_ATAC_956
		chr1	111991425	111992163	RT4_ATAC_957		chr7	124569398	124570432	SW_ATAC_957		chr1	55446193	55446782	SC_ATAC_957		chr1	61340283	61340654	HT_ATAC_957
		chr1	111992275	111992369	RT4_ATAC_958		chr17	53828006	53829344	SW_ATAC_958		chr1	55487568	55488363	SC_ATAC_958		chr1	61343763	61344267	HT_ATAC_958
		chr1	112050415	112051141	RT4_ATAC_959		chr4	184579729	184580959	SW_ATAC_959		chr1	55504943	55505762	SC_ATAC_959		chr1	61373962	61374152	HT_ATAC_959
		chr1	112135437	112136040	RT4_ATAC_960		chr21	30396761	30397955	SW_ATAC_960		chr1	55606315	55606508	SC_ATAC_960		chr1	61407703	61409047	HT_ATAC_960
		chr1	112162039	112163071	RT4_ATAC_961		chrX	1510436	1512036	SW_ATAC_961		chr1	55680341	55681568	SC_ATAC_961		chr1	61508683	61509342	HT_ATAC_961
		chr1	112280941	112281528	RT4_ATAC_962		chr4	1339809	1341591	SW_ATAC_962		chr1	55750561	55750682	SC_ATAC_962		chr1	61515433	61516433	HT_ATAC_962
		chr1	112281619	112282576	RT4_ATAC_963		chr5	6712172	6713793	SW_ATAC_963		chr1	55776238	55776993	SC_ATAC_963		chr1	61522694	61523033	HT_ATAC_963
		chr1	112298050	112298977	RT4_ATAC_964		chr4	37687363	37688760	SW_ATAC_964		chr1	55894522	55895550	SC_ATAC_964		chr1	61542307	61543170	HT_ATAC_964
		chr1	112518920	112519416	RT4_ATAC_965		chr8	95907264	95908615	SW_ATAC_965		chr1	55908743	55909570	SC_ATAC_965		chr1	61543464	61543879	HT_ATAC_965
		chr1	112912368	112912616	RT4_ATAC_966		chr11	57078269	57079410	SW_ATAC_966		chr1	56106568	56107155	SC_ATAC_966		chr1	61604799	61605700	HT_ATAC_966
		chr1	112938556	112939102	RT4_ATAC_967		chr4	144105217	144107050	SW_ATAC_967		chr1	56431739	56432234	SC_ATAC_967		chr1	61605860	61605938	HT_ATAC_967
		chr1	113008583	113009038	RT4_ATAC_968		chr16	54962650	54965078	SW_ATAC_968		chr1	56530369	56531009	SC_ATAC_968		chr1	61614782	61615587	HT_ATAC_968
		chr1	113162104	113162533	RT4_ATAC_969		chr2	128458074	128459957	SW_ATAC_969		chr1	56646594	56646964	SC_ATAC_969		chr1	61751806	61752495	HT_ATAC_969
		chr1	113216984	113218031	RT4_ATAC_970		chr3	32611070	32613122	SW_ATAC_970		chr1	56874826	56875203	SC_ATAC_970		chr1	61787741	61788368	HT_ATAC_970
		chr1	113247345	113248239	RT4_ATAC_971		chr2	191183735	191184904	SW_ATAC_971		chr1	56880293	56880786	SC_ATAC_971		chr1	61789379	61789940	HT_ATAC_971
		chr1	113249993	113250223	RT4_ATAC_972		chr2	20379304	20380373	SW_ATAC_972		chr1	56914531	56915072	SC_ATAC_972		chr1	61795395	61796586	HT_ATAC_972
		chr1	113257701	113258471	RT4_ATAC_973		chr9	74382795	74384674	SW_ATAC_973		chr1	56972289	56973319	SC_ATAC_973		chr1	61803709	61804447	HT_ATAC_973
		chr1	113258979	113259151	RT4_ATAC_974		chr7	20256805	20257594	SW_ATAC_974		chr1	56982061	56982361	SC_ATAC_974		chr1	61946531	61947377	HT_ATAC_974
		chr1	113346909	113347204	RT4_ATAC_975		chr16	9184724	9186688	SW_ATAC_975		chr1	56982602	56983029	SC_ATAC_975		chr1	61947548	61947749	HT_ATAC_975
		chr1	113498118	113499306	RT4_ATAC_976		chr5	68513389	68514244	SW_ATAC_976		chr1	56999044	56999929	SC_ATAC_976		chr1	61962045	61962548	HT_ATAC_976
		chr1	113615277	113616376	RT4_ATAC_977		chr20	24972680	24973791	SW_ATAC_977		chr1	57043980	57045496	SC_ATAC_977		chr1	61970297	61971103	HT_ATAC_977
		chr1	113932562	113933214	RT4_ATAC_978		chr6	20401388	20402183	SW_ATAC_978		chr1	57142220	57143017	SC_ATAC_978		chr1	62107514	62107653	HT_ATAC_978
		chr1	114301985	114302279	RT4_ATAC_979		chr7	64363209	64364448	SW_ATAC_979		chr1	57153997	57154825	SC_ATAC_979		chr1	62107843	62108104	HT_ATAC_979
		chr1	114354227	114355320	RT4_ATAC_980		chr7	107531064	107532321	SW_ATAC_980		chr1	57269354	57269505	SC_ATAC_980		chr1	62108272	62108954	HT_ATAC_980
		chr1	114447002	114448054	RT4_ATAC_981		chr7	35042870	35044010	SW_ATAC_981		chr1	57284424	57285374	SC_ATAC_981		chr1	62189955	62191373	HT_ATAC_981
		chr1	114472058	114473122	RT4_ATAC_982		chr11	102217337	102219091	SW_ATAC_982		chr1	57286802	57286988	SC_ATAC_982		chr1	62207796	62209030	HT_ATAC_982
		chr1	114888930	114889081	RT4_ATAC_983		chr9	20683439	20685007	SW_ATAC_983		chr1	58297301	58297861	SC_ATAC_983		chr1	62312530	62312876	HT_ATAC_983
		chr1	114889167	114889452	RT4_ATAC_984		chr3	100427489	100429119	SW_ATAC_984		chr1	58310396	58311233	SC_ATAC_984		chr1	62317699	62318063	HT_ATAC_984
		chr1	115053686	115054255	RT4_ATAC_985		chr7	106808753	106810693	SW_ATAC_985		chr1	59011786	59012824	SC_ATAC_985		chr1	62548162	62548613	HT_ATAC_985
		chr1	115124159	115124481	RT4_ATAC_986		chr3	100053083	100054098	SW_ATAC_986		chr1	59038451	59038629	SC_ATAC_986		chr1	62596798	62597452	HT_ATAC_986
		chr1	115153247	115153851	RT4_ATAC_987		chr2	60983187	60984516	SW_ATAC_987		chr1	59042572	59043497	SC_ATAC_987		chr1	62641356	62641510	HT_ATAC_987
		chr1	115212243	115212921	RT4_ATAC_988		chr6	116936962	116938476	SW_ATAC_988		chr1	59049787	59050767	SC_ATAC_988		chr1	62696308	62697133	HT_ATAC_988
		chr1	115259318	115259550	RT4_ATAC_989		chr16	27560739	27561936	SW_ATAC_989		chr1	59057875	59058846	SC_ATAC_989		chr1	62702569	62703104	HT_ATAC_989
		chr1	115299696	115300318	RT4_ATAC_990		chr11	14912696	14914175	SW_ATAC_990		chr1	59083717	59084521	SC_ATAC_990		chr1	62703277	62703350	HT_ATAC_990
		chr1	115300401	115300835	RT4_ATAC_991		chr1	16992469	16994055	SW_ATAC_991		chr1	59118355	59118542	SC_ATAC_991		chr1	62703556	62704051	HT_ATAC_991
		chr1	115322982	115323553	RT4_ATAC_992		chr11	86012924	86013844	SW_ATAC_992		chr1	59165077	59165953	SC_ATAC_992		chr1	62773325	62774521	HT_ATAC_992
		chr1	115605091	115605695	RT4_ATAC_993		chr13	28194175	28196262	SW_ATAC_993		chr1	59192913	59193517	SC_ATAC_993		chr1	62775368	62775904	HT_ATAC_993
		chr1	115641934	115642604	RT4_ATAC_994		chr12	102270328	102272222	SW_ATAC_994		chr1	59220938	59221488	SC_ATAC_994		chr1	62787179	62787584	HT_ATAC_994
		chr1	116073250	116073514	RT4_ATAC_995		chr3	156391738	156393646	SW_ATAC_995		chr1	59249437	59250130	SC_ATAC_995		chr1	62790865	62791621	HT_ATAC_995
		chr1	116088443	116089063	RT4_ATAC_996		chr20	13765033	13766375	SW_ATAC_996		chr1	59250241	59250397	SC_ATAC_996		chr1	62802432	62804050	HT_ATAC_996
		chr1	116257058	116257822	RT4_ATAC_997		chr2	61292400	61293836	SW_ATAC_997		chr1	59250865	59251014	SC_ATAC_997		chr1	62820822	62821085	HT_ATAC_997
		chr1	116314402	116314763	RT4_ATAC_998		chr7	107383464	107385111	SW_ATAC_998		chr1	59280736	59281644	SC_ATAC_998		chr1	62822200	62822594	HT_ATAC_998
		chr1	116325276	116325915	RT4_ATAC_999		chr7	143598411	143599493	SW_ATAC_999		chr1	59281765	59282427	SC_ATAC_999		chr1	62892036	62892203	HT_ATAC_999
		chr1	116710876	116711254	RT4_ATAC_1000		chr1	87169624	87171246	SW_ATAC_1000		chr1	59289133	59289410	SC_ATAC_1000		chr1	62901582	62903350	HT_ATAC_1000
		chr1	116915499	116916079	RT4_ATAC_1001		chr17	53510317	53511597	SW_ATAC_1001		chr1	59289500	59289620	SC_ATAC_1001		chr1	63153128	63154518	HT_ATAC_1001
		chr1	116961075	116961541	RT4_ATAC_1002		chr2	75185255	75186767	SW_ATAC_1002		chr1	59290455	59291064	SC_ATAC_1002		chr1	63249163	63250607	HT_ATAC_1002
		chr1	117112937	117113266	RT4_ATAC_1003		chr1	169336409	169338102	SW_ATAC_1003		chr1	59314344	59315263	SC_ATAC_1003		chr1	63289121	63289581	HT_ATAC_1003
		chr1	117113365	117113877	RT4_ATAC_1004		chr12	70132115	70133870	SW_ATAC_1004		chr1	59348837	59349489	SC_ATAC_1004		chr1	63782473	63783382	HT_ATAC_1004
		chr1	117262895	117263302	RT4_ATAC_1005		chr16	58767163	58768626	SW_ATAC_1005		chr1	59354372	59355061	SC_ATAC_1005		chr1	63793337	63793537	HT_ATAC_1005
		chr1	117396361	117396700	RT4_ATAC_1006		chr5	108790899	108792001	SW_ATAC_1006		chr1	59369073	59369943	SC_ATAC_1006		chr1	63832719	63834236	HT_ATAC_1006
		chr1	117602301	117603026	RT4_ATAC_1007		chr12	77271882	77273535	SW_ATAC_1007		chr1	59387981	59388663	SC_ATAC_1007		chr1	63907220	63907756	HT_ATAC_1007
		chr1	117664286	117664613	RT4_ATAC_1008		chr3	96531996	96533232	SW_ATAC_1008		chr1	59395275	59395652	SC_ATAC_1008		chr1	63988409	63989732	HT_ATAC_1008
		chr1	117664699	117664937	RT4_ATAC_1009		chr3	141205638	141206870	SW_ATAC_1009		chr1	59398398	59399245	SC_ATAC_1009		chr1	64058777	64060295	HT_ATAC_1009
		chr1	117753462	117753952	RT4_ATAC_1010		chr8	120885721	120887194	SW_ATAC_1010		chr1	59481516	59481866	SC_ATAC_1010		chr1	64081578	64081772	HT_ATAC_1010
		chr1	117909189	117910176	RT4_ATAC_1011		chr16	18937047	18938575	SW_ATAC_1011		chr1	59522956	59523301	SC_ATAC_1011		chr1	64116814	64117491	HT_ATAC_1011
		chr1	118113416	118114428	RT4_ATAC_1012		chr7	17978825	17980731	SW_ATAC_1012		chr1	59573093	59573932	SC_ATAC_1012		chr1	64127722	64129321	HT_ATAC_1012
		chr1	118148345	118149842	RT4_ATAC_1013		chr7	123174149	123175545	SW_ATAC_1013		chr1	59608769	59609140	SC_ATAC_1013		chr1	64239312	64241062	HT_ATAC_1013
		chr1	118301351	118301772	RT4_ATAC_1014		chr3	135684085	135685459	SW_ATAC_1014		chr1	59616650	59617688	SC_ATAC_1014		chr1	64333943	64334305	HT_ATAC_1014
		chr1	118471510	118471675	RT4_ATAC_1015		chr5	110847646	110848949	SW_ATAC_1015		chr1	59761954	59762978	SC_ATAC_1015		chr1	64385933	64386895	HT_ATAC_1015
		chr1	118471759	118472655	RT4_ATAC_1016		chr1	159915257	159916281	SW_ATAC_1016		chr1	59840880	59841636	SC_ATAC_1016		chr1	64435088	64435703	HT_ATAC_1016
		chr1	118570722	118571234	RT4_ATAC_1017		chr14	24422363	24423697	SW_ATAC_1017		chr1	59892715	59893441	SC_ATAC_1017		chr1	64446794	64447498	HT_ATAC_1017
		chr1	118752265	118752793	RT4_ATAC_1018		chr8	12051284	12052302	SW_ATAC_1018		chr1	59910830	59911223	SC_ATAC_1018		chr1	64472146	64472950	HT_ATAC_1018
		chr1	119682627	119683090	RT4_ATAC_1019		chr2	120516912	120518094	SW_ATAC_1019		chr1	59949867	59950152	SC_ATAC_1019		chr1	64505260	64505555	HT_ATAC_1019
		chr1	119683171	119683479	RT4_ATAC_1020		chr14	81104612	81105496	SW_ATAC_1020		chr1	59952818	59953548	SC_ATAC_1020		chr1	64637300	64637955	HT_ATAC_1020
		chr1	119822105	119822395	RT4_ATAC_1021		chr1	100124952	100125840	SW_ATAC_1021		chr1	59964959	59965295	SC_ATAC_1021		chr1	64668939	64669786	HT_ATAC_1021
		chr1	120190718	120191284	RT4_ATAC_1022		chr3	130745106	130746333	SW_ATAC_1022		chr1	59965399	59965817	SC_ATAC_1022		chr1	64728513	64729814	HT_ATAC_1022
		chr1	120254883	120255583	RT4_ATAC_1023		chr1	76080246	76081914	SW_ATAC_1023		chr1	60061523	60061829	SC_ATAC_1023		chr1	64808862	64810138	HT_ATAC_1023
		chr1	120322474	120322909	RT4_ATAC_1024		chr2	32852416	32853698	SW_ATAC_1024		chr1	60062010	60062910	SC_ATAC_1024		chr1	64935686	64936533	HT_ATAC_1024
		chr1	120543893	120544106	RT4_ATAC_1025		chr2	48570882	48571876	SW_ATAC_1025		chr1	60138591	60138816	SC_ATAC_1025		chr1	65344605	65345262	HT_ATAC_1025
		chr1	120574294	120575236	RT4_ATAC_1026		chr4	170533114	170534141	SW_ATAC_1026		chr1	60138976	60139953	SC_ATAC_1026		chr1	65363504	65364529	HT_ATAC_1026
		chr1	120601551	120601687	RT4_ATAC_1027		chr4	153456618	153458159	SW_ATAC_1027		chr1	60196008	60196841	SC_ATAC_1027		chr1	65381261	65381862	HT_ATAC_1027
		chr1	120601802	120602367	RT4_ATAC_1028		chr1	117602008	117603596	SW_ATAC_1028		chr1	60216132	60216791	SC_ATAC_1028		chr1	65382977	65383544	HT_ATAC_1028
		chr1	120604112	120604761	RT4_ATAC_1029		chr14	77842741	77844225	SW_ATAC_1029		chr1	60224979	60225412	SC_ATAC_1029		chr1	65413925	65414190	HT_ATAC_1029
		chr1	120611150	120611282	RT4_ATAC_1030		chr1	195972041	195972513	SW_ATAC_1030		chr1	60230607	60231268	SC_ATAC_1030		chr1	65431184	65432594	HT_ATAC_1030
		chr1	120611791	120612706	RT4_ATAC_1031		chr14	31888971	31890232	SW_ATAC_1031		chr1	60279965	60281179	SC_ATAC_1031		chr1	65448846	65449365	HT_ATAC_1031
		chr1	120838246	120839062	RT4_ATAC_1032		chr11	77705461	77706433	SW_ATAC_1032		chr1	60358547	60359007	SC_ATAC_1032		chr1	65455098	65455920	HT_ATAC_1032
		chr1	120844560	120845054	RT4_ATAC_1033		chr5	131831416	131833044	SW_ATAC_1033		chr1	60391971	60393136	SC_ATAC_1033		chr1	65531884	65533151	HT_ATAC_1033
		chr1	120925251	120926112	RT4_ATAC_1034		chr5	64858481	64859875	SW_ATAC_1034		chr1	60747105	60747341	SC_ATAC_1034		chr1	65533315	65533989	HT_ATAC_1034
		chr1	121260837	121261677	RT4_ATAC_1035		chr4	102267716	102269821	SW_ATAC_1035		chr1	61034745	61035318	SC_ATAC_1035		chr1	65613178	65614905	HT_ATAC_1035
		chr1	143907072	143907729	RT4_ATAC_1036		chr2	122493888	122495136	SW_ATAC_1036		chr1	61039425	61040010	SC_ATAC_1036		chr1	65643102	65643622	HT_ATAC_1036
		chr1	143913091	143914403	RT4_ATAC_1037		chr6	82956798	82958547	SW_ATAC_1037		chr1	61407759	61408808	SC_ATAC_1037		chr1	65713259	65714219	HT_ATAC_1037
		chr1	143930160	143931134	RT4_ATAC_1038		chr5	70882205	70883828	SW_ATAC_1038		chr1	61444739	61444891	SC_ATAC_1038		chr1	65719773	65720829	HT_ATAC_1038
		chr1	143943626	143943831	RT4_ATAC_1039		chr2	128144580	128146228	SW_ATAC_1039		chr1	61508509	61509060	SC_ATAC_1039		chr1	65726657	65727049	HT_ATAC_1039
		chr1	144028588	144029148	RT4_ATAC_1040		chrX	14890952	14892020	SW_ATAC_1040		chr1	61515615	61516027	SC_ATAC_1040		chr1	65775031	65775995	HT_ATAC_1040
		chr1	144593275	144593766	RT4_ATAC_1041		chr5	112072968	112074268	SW_ATAC_1041		chr1	61516153	61516410	SC_ATAC_1041		chr1	65885449	65886726	HT_ATAC_1041
		chr1	144931682	144932974	RT4_ATAC_1042		chr11	111472615	111473932	SW_ATAC_1042		chr1	61542613	61543172	SC_ATAC_1042		chr1	65889702	65889894	HT_ATAC_1042
		chr1	145009578	145009702	RT4_ATAC_1043		chr14	68161454	68162669	SW_ATAC_1043		chr1	61543564	61543903	SC_ATAC_1043		chr1	65900175	65900950	HT_ATAC_1043
		chr1	145029856	145030442	RT4_ATAC_1044		chr9	77642345	77643657	SW_ATAC_1044		chr1	61615018	61615396	SC_ATAC_1044		chr1	65960370	65960667	HT_ATAC_1044
		chr1	145039344	145040358	RT4_ATAC_1045		chr6	122792191	122793486	SW_ATAC_1045		chr1	61803356	61804131	SC_ATAC_1045		chr1	65992896	65993154	HT_ATAC_1045
		chr1	145138944	145139205	RT4_ATAC_1046		chr1	212207963	212209412	SW_ATAC_1046		chr1	61804236	61804477	SC_ATAC_1046		chr1	65993410	65993748	HT_ATAC_1046
		chr1	145139303	145139970	RT4_ATAC_1047		chr9	85676866	85678359	SW_ATAC_1047		chr1	61890015	61890647	SC_ATAC_1047		chr1	66153304	66153634	HT_ATAC_1047
		chr1	145179692	145179978	RT4_ATAC_1048		chr2	210866656	210868033	SW_ATAC_1048		chr1	61918845	61919319	SC_ATAC_1048		chr1	66424685	66425165	HT_ATAC_1048
		chr1	145208672	145209445	RT4_ATAC_1049		chr13	101326055	101327936	SW_ATAC_1049		chr1	61946850	61947579	SC_ATAC_1049		chr1	66708359	66708646	HT_ATAC_1049
		chr1	145216615	145217316	RT4_ATAC_1050		chr3	179040197	179041669	SW_ATAC_1050		chr1	61962088	61962995	SC_ATAC_1050		chr1	66718897	66719286	HT_ATAC_1050
		chr1	145219396	145219614	RT4_ATAC_1051		chr12	74436817	74437617	SW_ATAC_1051		chr1	61970569	61971194	SC_ATAC_1051		chr1	66727941	66728779	HT_ATAC_1051
		chr1	145219760	145219889	RT4_ATAC_1052		chr7	7221376	7223104	SW_ATAC_1052		chr1	61984709	61984996	SC_ATAC_1052		chr1	66736950	66738060	HT_ATAC_1052
		chr1	145246199	145247135	RT4_ATAC_1053		chr14	81901622	81903205	SW_ATAC_1053		chr1	62050864	62051697	SC_ATAC_1053		chr1	66760514	66760893	HT_ATAC_1053
		chr1	145396655	145397270	RT4_ATAC_1054		chr14	67825692	67827722	SW_ATAC_1054		chr1	62071656	62071894	SC_ATAC_1054		chr1	66766601	66767121	HT_ATAC_1054
		chr1	145438023	145438548	RT4_ATAC_1055		chr3	119216740	119218070	SW_ATAC_1055		chr1	62072010	62072625	SC_ATAC_1055		chr1	66797323	66798450	HT_ATAC_1055
		chr1	145455324	145456249	RT4_ATAC_1056		chr7	64022737	64023894	SW_ATAC_1056		chr1	62107487	62107664	SC_ATAC_1056		chr1	66901970	66902945	HT_ATAC_1056
		chr1	145470124	145470714	RT4_ATAC_1057		chr20	37590289	37591513	SW_ATAC_1057		chr1	62190415	62191382	SC_ATAC_1057		chr1	66911978	66912570	HT_ATAC_1057
		chr1	145476824	145477279	RT4_ATAC_1058		chr20	25676376	25677876	SW_ATAC_1058		chr1	62207546	62207640	SC_ATAC_1058		chr1	66931746	66932667	HT_ATAC_1058
		chr1	145507386	145507716	RT4_ATAC_1059		chr3	167966910	167968145	SW_ATAC_1059		chr1	62207740	62209007	SC_ATAC_1059		chr1	66987359	66987869	HT_ATAC_1059
		chr1	145507825	145507979	RT4_ATAC_1060		chr18	77438771	77440290	SW_ATAC_1060		chr1	62417400	62418369	SC_ATAC_1060		chr1	66990812	66991067	HT_ATAC_1060
		chr1	145515827	145517002	RT4_ATAC_1061		chr8	61564134	61565413	SW_ATAC_1061		chr1	62542041	62542258	SC_ATAC_1061		chr1	66998326	67000295	HT_ATAC_1061
		chr1	145542656	145543136	RT4_ATAC_1062		chr1	100816767	100818899	SW_ATAC_1062		chr1	62587965	62588352	SC_ATAC_1062		chr1	67006455	67006666	HT_ATAC_1062
		chr1	145543583	145543812	RT4_ATAC_1063		chr17	52977686	52979151	SW_ATAC_1063		chr1	62696319	62696967	SC_ATAC_1063		chr1	67028446	67028553	HT_ATAC_1063
		chr1	145548827	145549264	RT4_ATAC_1064		chr6	52216802	52217804	SW_ATAC_1064		chr1	62702567	62702765	SC_ATAC_1064		chr1	67028871	67030564	HT_ATAC_1064
		chr1	145575087	145576121	RT4_ATAC_1065		chr1	100714685	100715859	SW_ATAC_1065		chr1	62752388	62753083	SC_ATAC_1065		chr1	67035990	67036171	HT_ATAC_1065
		chr1	145589093	145589536	RT4_ATAC_1066		chr5	158689536	158690842	SW_ATAC_1066		chr1	62773574	62774213	SC_ATAC_1066		chr1	67037344	67037803	HT_ATAC_1066
		chr1	145610619	145611598	RT4_ATAC_1067		chr3	139396040	139397004	SW_ATAC_1067		chr1	62787179	62787613	SC_ATAC_1067		chr1	67090067	67090578	HT_ATAC_1067
		chr1	145694328	145694867	RT4_ATAC_1068		chr11	102138423	102139760	SW_ATAC_1068		chr1	62790862	62791587	SC_ATAC_1068		chr1	67191484	67191990	HT_ATAC_1068
		chr1	145826433	145827276	RT4_ATAC_1069		chr9	44992244	44993587	SW_ATAC_1069		chr1	62802656	62803839	SC_ATAC_1069		chr1	67389662	67391457	HT_ATAC_1069
		chr1	146638986	146639273	RT4_ATAC_1070		chr4	146830335	146831557	SW_ATAC_1070		chr1	62822200	62822451	SC_ATAC_1070		chr1	67395520	67396732	HT_ATAC_1070
		chr1	146643622	146644459	RT4_ATAC_1071		chr2	136705799	136707170	SW_ATAC_1071		chr1	62901820	62902528	SC_ATAC_1071		chr1	67518507	67520152	HT_ATAC_1071
		chr1	146714084	146714560	RT4_ATAC_1072		chr1	165599710	165601635	SW_ATAC_1072		chr1	62902630	62903108	SC_ATAC_1072		chr1	67525999	67526750	HT_ATAC_1072
		chr1	146714645	146714865	RT4_ATAC_1073		chr4	110480762	110482531	SW_ATAC_1073		chr1	63087637	63087995	SC_ATAC_1073		chr1	67559917	67560409	HT_ATAC_1073
		chr1	146987241	146987611	RT4_ATAC_1074		chr4	100736686	100737334	SW_ATAC_1074		chr1	63153164	63154347	SC_ATAC_1074		chr1	67614206	67615124	HT_ATAC_1074
		chr1	147071247	147072148	RT4_ATAC_1075		chr12	38710002	38711312	SW_ATAC_1075		chr1	63249358	63249912	SC_ATAC_1075		chr1	67628538	67628955	HT_ATAC_1075
		chr1	147141610	147143059	RT4_ATAC_1076		chr2	24148678	24150600	SW_ATAC_1076		chr1	63782657	63783025	SC_ATAC_1076		chr1	67677448	67677757	HT_ATAC_1076
		chr1	147189122	147189589	RT4_ATAC_1077		chr4	170540697	170541888	SW_ATAC_1077		chr1	63783121	63783358	SC_ATAC_1077		chr1	67793511	67794035	HT_ATAC_1077
		chr1	147362426	147362620	RT4_ATAC_1078		chr10	112678210	112679812	SW_ATAC_1078		chr1	63787883	63788599	SC_ATAC_1078		chr1	67841936	67842523	HT_ATAC_1078
		chr1	147400295	147401175	RT4_ATAC_1079		chr13	20436919	20438705	SW_ATAC_1079		chr1	63832906	63833798	SC_ATAC_1079		chr1	67895111	67896867	HT_ATAC_1079
		chr1	148555598	148556073	RT4_ATAC_1080		chr2	38829131	38830872	SW_ATAC_1080		chr1	63988591	63989360	SC_ATAC_1080		chr1	67904720	67905703	HT_ATAC_1080
		chr1	149223687	149224252	RT4_ATAC_1081		chr3	9437882	9439547	SW_ATAC_1081		chr1	63989444	63989696	SC_ATAC_1081		chr1	67966087	67966708	HT_ATAC_1081
		chr1	149379204	149379773	RT4_ATAC_1082		chr4	48270992	48272385	SW_ATAC_1082		chr1	64013104	64014011	SC_ATAC_1082		chr1	67998156	67998554	HT_ATAC_1082
		chr1	149764088	149764933	RT4_ATAC_1083		chr2	129062362	129064221	SW_ATAC_1083		chr1	64058766	64060281	SC_ATAC_1083		chr1	68020744	68020924	HT_ATAC_1083
		chr1	149783919	149784200	RT4_ATAC_1084		chr14	51561544	51562695	SW_ATAC_1084		chr1	64127501	64128453	SC_ATAC_1084		chr1	68021075	68021513	HT_ATAC_1084
		chr1	149803680	149804777	RT4_ATAC_1085		chr8	81083069	81084226	SW_ATAC_1085		chr1	64128563	64128940	SC_ATAC_1085		chr1	68027432	68027925	HT_ATAC_1085
		chr1	149814172	149814586	RT4_ATAC_1086		chr8	13133168	13134757	SW_ATAC_1086		chr1	64140110	64140678	SC_ATAC_1086		chr1	68035798	68036748	HT_ATAC_1086
		chr1	149822351	149822754	RT4_ATAC_1087		chr7	64466508	64467335	SW_ATAC_1087		chr1	64157702	64157872	SC_ATAC_1087		chr1	68046407	68046650	HT_ATAC_1087
		chr1	149832169	149833421	RT4_ATAC_1088		chr5	159435731	159437196	SW_ATAC_1088		chr1	64197028	64197770	SC_ATAC_1088		chr1	68100579	68101199	HT_ATAC_1088
		chr1	149858047	149858452	RT4_ATAC_1089		chr3	25766195	25767638	SW_ATAC_1089		chr1	64239536	64240848	SC_ATAC_1089		chr1	68112454	68113073	HT_ATAC_1089
		chr1	149859287	149860223	RT4_ATAC_1090		chr2	33823601	33825098	SW_ATAC_1090		chr1	64325306	64325787	SC_ATAC_1090		chr1	68113246	68113395	HT_ATAC_1090
		chr1	149870995	149871641	RT4_ATAC_1091		chr2	190627022	190628218	SW_ATAC_1091		chr1	64333908	64334488	SC_ATAC_1091		chr1	68150604	68152672	HT_ATAC_1091
		chr1	149899411	149899876	RT4_ATAC_1092		chrX	11777128	11778084	SW_ATAC_1092		chr1	64472299	64473051	SC_ATAC_1092		chr1	68215069	68216255	HT_ATAC_1092
		chr1	149910966	149911537	RT4_ATAC_1093		chr11	45201585	45202903	SW_ATAC_1093		chr1	64505089	64505705	SC_ATAC_1093		chr1	68226111	68226428	HT_ATAC_1093
		chr1	150039075	150039926	RT4_ATAC_1094		chr11	111797312	111798451	SW_ATAC_1094		chr1	64598717	64599463	SC_ATAC_1094		chr1	68257279	68257998	HT_ATAC_1094
		chr1	150121941	150122360	RT4_ATAC_1095		chr12	16063754	16065267	SW_ATAC_1095		chr1	64637287	64638020	SC_ATAC_1095		chr1	68297539	68298163	HT_ATAC_1095
		chr1	150135355	150135792	RT4_ATAC_1096		chr20	58405638	58407218	SW_ATAC_1096		chr1	64728786	64729610	SC_ATAC_1096		chr1	68298417	68299534	HT_ATAC_1096
		chr1	150208310	150208727	RT4_ATAC_1097		chr11	85396353	85397703	SW_ATAC_1097		chr1	64734906	64735037	SC_ATAC_1097		chr1	68306021	68306716	HT_ATAC_1097
		chr1	150241018	150241627	RT4_ATAC_1098		chr4	143394659	143396283	SW_ATAC_1098		chr1	64735125	64735427	SC_ATAC_1098		chr1	68312112	68312973	HT_ATAC_1098
		chr1	150293818	150294285	RT4_ATAC_1099		chr4	173903042	173903817	SW_ATAC_1099		chr1	64774305	64774934	SC_ATAC_1099		chr1	68611207	68611913	HT_ATAC_1099
		chr1	150336048	150336844	RT4_ATAC_1100		chr2	20412117	20413208	SW_ATAC_1100		chr1	64808848	64810135	SC_ATAC_1100		chr1	68654143	68655006	HT_ATAC_1100
		chr1	150459643	150459975	RT4_ATAC_1101		chr20	42285327	42286963	SW_ATAC_1101		chr1	64935340	64936556	SC_ATAC_1101		chr1	68655864	68656241	HT_ATAC_1101
		chr1	150487623	150488474	RT4_ATAC_1102		chr3	80782561	80783819	SW_ATAC_1102		chr1	65210207	65211271	SC_ATAC_1102		chr1	68686802	68687391	HT_ATAC_1102
		chr1	150533483	150534269	RT4_ATAC_1103		chr1	173836733	173838410	SW_ATAC_1103		chr1	65289787	65290152	SC_ATAC_1103		chr1	68696534	68696638	HT_ATAC_1103
		chr1	150534408	150534803	RT4_ATAC_1104		chr1	162760080	162761173	SW_ATAC_1104		chr1	65363497	65364536	SC_ATAC_1104		chr1	68696806	68697859	HT_ATAC_1104
		chr1	150540669	150541015	RT4_ATAC_1105		chr7	138144369	138146183	SW_ATAC_1105		chr1	65399036	65400231	SC_ATAC_1105		chr1	68698105	68698513	HT_ATAC_1105
		chr1	150551562	150552418	RT4_ATAC_1106		chr1	95391733	95393473	SW_ATAC_1106		chr1	65431567	65432711	SC_ATAC_1106		chr1	68735256	68735993	HT_ATAC_1106
		chr1	150596619	150597026	RT4_ATAC_1107		chr5	23726839	23727763	SW_ATAC_1107		chr1	65467946	65469046	SC_ATAC_1107		chr1	68808173	68809028	HT_ATAC_1107
		chr1	150601585	150602370	RT4_ATAC_1108		chr1	85155300	85156667	SW_ATAC_1108		chr1	65532080	65533209	SC_ATAC_1108		chr1	68849586	68850844	HT_ATAC_1108
		chr1	150669494	150670006	RT4_ATAC_1109		chr3	180706658	180708010	SW_ATAC_1109		chr1	65541171	65541308	SC_ATAC_1109		chr1	68908673	68909111	HT_ATAC_1109
		chr1	150848963	150849489	RT4_ATAC_1110		chr7	115850331	115851749	SW_ATAC_1110		chr1	65607111	65607782	SC_ATAC_1110		chr1	68918517	68919414	HT_ATAC_1110
		chr1	150898580	150898892	RT4_ATAC_1111		chr3	39194199	39195315	SW_ATAC_1111		chr1	65613013	65613943	SC_ATAC_1111		chr1	68961715	68963396	HT_ATAC_1111
		chr1	151020114	151021204	RT4_ATAC_1112		chr4	68410381	68411565	SW_ATAC_1112		chr1	65614027	65614955	SC_ATAC_1112		chr1	70032864	70034537	HT_ATAC_1112
		chr1	151032021	151032254	RT4_ATAC_1113		chr16	53737350	53738344	SW_ATAC_1113		chr1	65640241	65640553	SC_ATAC_1113		chr1	70203384	70203548	HT_ATAC_1113
		chr1	151043457	151043758	RT4_ATAC_1114		chr1	118471472	118472836	SW_ATAC_1114		chr1	65643152	65643646	SC_ATAC_1114		chr1	70598526	70599073	HT_ATAC_1114
		chr1	151119062	151119654	RT4_ATAC_1115		chr4	155470864	155471962	SW_ATAC_1115		chr1	65644833	65645114	SC_ATAC_1115		chr1	70670446	70671936	HT_ATAC_1115
		chr1	151138300	151138833	RT4_ATAC_1116		chr1	211751104	211753304	SW_ATAC_1116		chr1	65681373	65681522	SC_ATAC_1116		chr1	70686698	70687826	HT_ATAC_1116
		chr1	151167733	151168020	RT4_ATAC_1117		chr5	121296983	121298355	SW_ATAC_1117		chr1	65713292	65714138	SC_ATAC_1117		chr1	70819202	70820961	HT_ATAC_1117
		chr1	151226893	151227559	RT4_ATAC_1118		chr1	164527746	164529499	SW_ATAC_1118		chr1	65719769	65720964	SC_ATAC_1118		chr1	70876265	70877497	HT_ATAC_1118
		chr1	151253691	151254839	RT4_ATAC_1119		chr11	47788020	47789318	SW_ATAC_1119		chr1	65775503	65775688	SC_ATAC_1119		chr1	71255956	71256088	HT_ATAC_1119
		chr1	151284097	151284351	RT4_ATAC_1120		chr14	67398721	67400062	SW_ATAC_1120		chr1	65885430	65886687	SC_ATAC_1120		chr1	71256251	71256525	HT_ATAC_1120
		chr1	151300075	151300296	RT4_ATAC_1121		chr13	73355404	73356760	SW_ATAC_1121		chr1	65895521	65895908	SC_ATAC_1121		chr1	71339836	71340377	HT_ATAC_1121
		chr1	151319303	151320046	RT4_ATAC_1122		chr2	153031495	153033069	SW_ATAC_1122		chr1	66153455	66153639	SC_ATAC_1122		chr1	71340550	71341004	HT_ATAC_1122
		chr1	151371883	151372282	RT4_ATAC_1123		chr11	124745774	124746790	SW_ATAC_1123		chr1	66708425	66708645	SC_ATAC_1123		chr1	71515801	71515975	HT_ATAC_1123
		chr1	151486392	151486779	RT4_ATAC_1124		chr7	27701772	27702912	SW_ATAC_1124		chr1	66719065	66719265	SC_ATAC_1124		chr1	71545906	71546063	HT_ATAC_1124
		chr1	151512069	151512450	RT4_ATAC_1125		chr9	15552126	15553622	SW_ATAC_1125		chr1	66727793	66728377	SC_ATAC_1125		chr1	71546243	71547265	HT_ATAC_1125
		chr1	151512549	151513423	RT4_ATAC_1126		chr5	79783424	79784664	SW_ATAC_1126		chr1	66736976	66737974	SC_ATAC_1126		chr1	72748076	72749722	HT_ATAC_1126
		chr1	151584281	151584726	RT4_ATAC_1127		chr12	67662188	67663999	SW_ATAC_1127		chr1	66760514	66761084	SC_ATAC_1127		chr1	74663192	74664213	HT_ATAC_1127
		chr1	151762596	151763369	RT4_ATAC_1128		chr4	10007859	10009109	SW_ATAC_1128		chr1	66766949	66767126	SC_ATAC_1128		chr1	75198166	75199651	HT_ATAC_1128
		chr1	151881649	151882241	RT4_ATAC_1129		chr5	154317065	154318118	SW_ATAC_1129		chr1	66781414	66781679	SC_ATAC_1129		chr1	75545544	75546070	HT_ATAC_1129
		chr1	151945530	151945756	RT4_ATAC_1130		chr11	124609386	124610779	SW_ATAC_1130		chr1	66902141	66902718	SC_ATAC_1130		chr1	75600732	75601378	HT_ATAC_1130
		chr1	151965985	151966490	RT4_ATAC_1131		chr1	209978357	209980052	SW_ATAC_1131		chr1	66912190	66912292	SC_ATAC_1131		chr1	75731465	75732210	HT_ATAC_1131
		chr1	151971180	151971730	RT4_ATAC_1132		chr1	160000696	160002198	SW_ATAC_1132		chr1	66943754	66944141	SC_ATAC_1132		chr1	75840992	75841113	HT_ATAC_1132
		chr1	152006921	152007313	RT4_ATAC_1133		chr5	128461386	128462873	SW_ATAC_1133		chr1	66945938	66946301	SC_ATAC_1133		chr1	75841267	75841733	HT_ATAC_1133
		chr1	152007622	152007828	RT4_ATAC_1134		chr5	5271194	5272616	SW_ATAC_1134		chr1	66946596	66946809	SC_ATAC_1134		chr1	75841932	75842148	HT_ATAC_1134
		chr1	152020130	152021188	RT4_ATAC_1135		chr3	134203925	134205901	SW_ATAC_1135		chr1	66969651	66969815	SC_ATAC_1135		chr1	76080298	76082704	HT_ATAC_1135
		chr1	152380647	152380732	RT4_ATAC_1136		chr5	15009521	15009867	SW_ATAC_1136		chr1	66987336	66987891	SC_ATAC_1136		chr1	76189687	76191105	HT_ATAC_1136
		chr1	153488037	153488140	RT4_ATAC_1137		chr8	75232463	75234016	SW_ATAC_1137		chr1	67005214	67005661	SC_ATAC_1137		chr1	76231286	76231881	HT_ATAC_1137
		chr1	153488228	153488847	RT4_ATAC_1138		chr12	72079711	72080372	SW_ATAC_1138		chr1	67029772	67030509	SC_ATAC_1138		chr1	76251353	76252490	HT_ATAC_1138
		chr1	153508212	153508810	RT4_ATAC_1139		chr5	102005986	102007475	SW_ATAC_1139		chr1	67041290	67041782	SC_ATAC_1139		chr1	76252924	76253017	HT_ATAC_1139
		chr1	153517406	153517797	RT4_ATAC_1140		chr16	46722107	46724220	SW_ATAC_1140		chr1	67254207	67254558	SC_ATAC_1140		chr1	76262062	76263188	HT_ATAC_1140
		chr1	153537839	153539509	RT4_ATAC_1141		chr14	60714690	60716662	SW_ATAC_1141		chr1	67390415	67391446	SC_ATAC_1141		chr1	76457313	76457515	HT_ATAC_1141
		chr1	153581394	153581993	RT4_ATAC_1142		chr13	64649079	64650328	SW_ATAC_1142		chr1	67395674	67396554	SC_ATAC_1142		chr1	76539668	76541145	HT_ATAC_1142
		chr1	153599484	153600358	RT4_ATAC_1143		chr11	94822563	94823760	SW_ATAC_1143		chr1	67518795	67520285	SC_ATAC_1143		chr1	76619711	76620650	HT_ATAC_1143
		chr1	153606253	153606607	RT4_ATAC_1144		chr7	123437634	123439172	SW_ATAC_1144		chr1	67526296	67526909	SC_ATAC_1144		chr1	76744614	76745718	HT_ATAC_1144
		chr1	153606792	153607034	RT4_ATAC_1145		chr3	100210857	100211896	SW_ATAC_1145		chr1	67591738	67592046	SC_ATAC_1145		chr1	77333086	77334517	HT_ATAC_1145
		chr1	153643385	153644445	RT4_ATAC_1146		chr4	129208293	129210200	SW_ATAC_1146		chr1	67614752	67615125	SC_ATAC_1146		chr1	77393636	77394577	HT_ATAC_1146
		chr1	153700149	153700704	RT4_ATAC_1147		chr7	66309229	66310644	SW_ATAC_1147		chr1	67677424	67677545	SC_ATAC_1147		chr1	77415117	77416431	HT_ATAC_1147
		chr1	153755817	153756065	RT4_ATAC_1148		chr3	156272419	156273501	SW_ATAC_1148		chr1	67696128	67696611	SC_ATAC_1148		chr1	77436875	77437132	HT_ATAC_1148
		chr1	153756157	153756375	RT4_ATAC_1149		chr14	24835363	24836775	SW_ATAC_1149		chr1	67813463	67813637	SC_ATAC_1149		chr1	77464276	77465026	HT_ATAC_1149
		chr1	153894940	153895880	RT4_ATAC_1150		chr20	30311016	30311885	SW_ATAC_1150		chr1	67813727	67814319	SC_ATAC_1150		chr1	77505344	77505940	HT_ATAC_1150
		chr1	153918384	153919006	RT4_ATAC_1151		chr2	74153766	74154345	SW_ATAC_1151		chr1	67821221	67822430	SC_ATAC_1151		chr1	77533771	77534004	HT_ATAC_1151
		chr1	153930607	153931318	RT4_ATAC_1152		chr15	100272988	100274085	SW_ATAC_1152		chr1	67896024	67896981	SC_ATAC_1152		chr1	77684274	77685278	HT_ATAC_1152
		chr1	153935761	153936226	RT4_ATAC_1153		chr1	65719731	65721175	SW_ATAC_1153		chr1	67966046	67966398	SC_ATAC_1153		chr1	77747362	77748886	HT_ATAC_1153
		chr1	153939681	153940382	RT4_ATAC_1154		chr5	86416268	86417795	SW_ATAC_1154		chr1	67996455	67996771	SC_ATAC_1154		chr1	77787859	77788190	HT_ATAC_1154
		chr1	153950079	153950312	RT4_ATAC_1155		chr1	197743833	197745812	SW_ATAC_1155		chr1	68001193	68001607	SC_ATAC_1155		chr1	77999136	77999633	HT_ATAC_1155
		chr1	153950399	153950488	RT4_ATAC_1156		chr11	109762473	109763616	SW_ATAC_1156		chr1	68024895	68025336	SC_ATAC_1156		chr1	78004975	78005736	HT_ATAC_1156
		chr1	154155597	154156000	RT4_ATAC_1157		chr5	86563132	86564847	SW_ATAC_1157		chr1	68036151	68036718	SC_ATAC_1157		chr1	78070406	78071288	HT_ATAC_1157
		chr1	154169441	154169893	RT4_ATAC_1158		chr3	169490463	169491636	SW_ATAC_1158		chr1	68041450	68042024	SC_ATAC_1158		chr1	78147845	78149585	HT_ATAC_1158
		chr1	154192562	154193475	RT4_ATAC_1159		chr1	94883448	94885095	SW_ATAC_1159		chr1	68084082	68084659	SC_ATAC_1159		chr1	78224549	78225859	HT_ATAC_1159
		chr1	154377527	154378607	RT4_ATAC_1160		chr13	99698067	99699242	SW_ATAC_1160		chr1	68092118	68092656	SC_ATAC_1160		chr1	78245163	78246192	HT_ATAC_1160
		chr1	154390651	154391494	RT4_ATAC_1161		chr18	43382359	43383419	SW_ATAC_1161		chr1	68150566	68151168	SC_ATAC_1161		chr1	78354139	78355205	HT_ATAC_1161
		chr1	154531060	154531596	RT4_ATAC_1162		chr5	60457629	60459539	SW_ATAC_1162		chr1	68152003	68152677	SC_ATAC_1162		chr1	78443856	78444128	HT_ATAC_1162
		chr1	154842555	154842954	RT4_ATAC_1163		chr8	124285920	124287675	SW_ATAC_1163		chr1	68166370	68166784	SC_ATAC_1163		chr1	78444325	78445318	HT_ATAC_1163
		chr1	154909028	154909573	RT4_ATAC_1164		chr14	89029172	89030023	SW_ATAC_1164		chr1	68174173	68174609	SC_ATAC_1164		chr1	78445578	78445876	HT_ATAC_1164
		chr1	154909673	154909879	RT4_ATAC_1165		chr7	76750944	76752126	SW_ATAC_1165		chr1	68179149	68179541	SC_ATAC_1165		chr1	78469725	78470235	HT_ATAC_1165
		chr1	154928539	154928761	RT4_ATAC_1166		chr2	127984015	127984885	SW_ATAC_1166		chr1	68189365	68189686	SC_ATAC_1166		chr1	78470400	78470681	HT_ATAC_1166
		chr1	154933874	154934093	RT4_ATAC_1167		chr2	114646909	114648833	SW_ATAC_1167		chr1	68190682	68191288	SC_ATAC_1167		chr1	78471485	78471600	HT_ATAC_1167
		chr1	154934199	154934583	RT4_ATAC_1168		chr7	25164189	25165568	SW_ATAC_1168		chr1	68201651	68202466	SC_ATAC_1168		chr1	78511441	78512545	HT_ATAC_1168
		chr1	154946826	154947203	RT4_ATAC_1169		chr2	118571923	118573098	SW_ATAC_1169		chr1	68215249	68216232	SC_ATAC_1169		chr1	78579452	78580535	HT_ATAC_1169
		chr1	154947354	154947579	RT4_ATAC_1170		chr6	48794360	48795493	SW_ATAC_1170		chr1	68225833	68226245	SC_ATAC_1170		chr1	79115363	79115608	HT_ATAC_1170
		chr1	154955511	154955919	RT4_ATAC_1171		chr8	99128586	99130451	SW_ATAC_1171		chr1	68269224	68269932	SC_ATAC_1171		chr1	79115844	79116105	HT_ATAC_1171
		chr1	154973527	154973854	RT4_ATAC_1172		chr9	80850346	80851918	SW_ATAC_1172		chr1	68298462	68299512	SC_ATAC_1172		chr1	79142222	79142482	HT_ATAC_1172
		chr1	154974513	154974837	RT4_ATAC_1173		chr1	244012424	244014524	SW_ATAC_1173		chr1	68302467	68302887	SC_ATAC_1173		chr1	79709232	79709445	HT_ATAC_1173
		chr1	154989702	154990251	RT4_ATAC_1174		chr3	120067381	120068950	SW_ATAC_1174		chr1	68316111	68316794	SC_ATAC_1174		chr1	80841384	80842269	HT_ATAC_1174
		chr1	155036065	155036956	RT4_ATAC_1175		chr6	96969242	96970640	SW_ATAC_1175		chr1	68348860	68349194	SC_ATAC_1175		chr1	80882740	80883695	HT_ATAC_1175
		chr1	155057247	155058039	RT4_ATAC_1176		chr2	215673543	215675033	SW_ATAC_1176		chr1	68355678	68356194	SC_ATAC_1176		chr1	80913276	80914153	HT_ATAC_1176
		chr1	155107514	155107845	RT4_ATAC_1177		chr12	105379120	105380743	SW_ATAC_1177		chr1	68639788	68640261	SC_ATAC_1177		chr1	80975479	80976198	HT_ATAC_1177
		chr1	155145327	155145944	RT4_ATAC_1178		chr13	103452555	103453222	SW_ATAC_1178		chr1	68663535	68663998	SC_ATAC_1178		chr1	81058728	81059195	HT_ATAC_1178
		chr1	155163125	155163547	RT4_ATAC_1179		chr11	89955318	89957006	SW_ATAC_1179		chr1	68686798	68687332	SC_ATAC_1179		chr1	81640464	81641059	HT_ATAC_1179
		chr1	155197195	155197633	RT4_ATAC_1180		chr6	91762259	91763258	SW_ATAC_1180		chr1	68697948	68698526	SC_ATAC_1180		chr1	81645027	81645289	HT_ATAC_1180
		chr1	155214340	155214758	RT4_ATAC_1181		chr7	20392204	20393191	SW_ATAC_1181		chr1	68735226	68735928	SC_ATAC_1181		chr1	81652048	81652257	HT_ATAC_1181
		chr1	155231556	155232361	RT4_ATAC_1182		chr8	82632752	82633921	SW_ATAC_1182		chr1	68786884	68787061	SC_ATAC_1182		chr1	81880047	81880420	HT_ATAC_1182
		chr1	155246974	155247662	RT4_ATAC_1183		chr4	152020212	152021475	SW_ATAC_1183		chr1	68796683	68797106	SC_ATAC_1183		chr1	82266989	82268019	HT_ATAC_1183
		chr1	155278145	155279142	RT4_ATAC_1184		chr8	26240153	26241394	SW_ATAC_1184		chr1	68808319	68808693	SC_ATAC_1184		chr1	84326154	84326981	HT_ATAC_1184
		chr1	155292920	155293339	RT4_ATAC_1185		chr7	134000988	134002250	SW_ATAC_1185		chr1	68849714	68850460	SC_ATAC_1185		chr1	84464064	84465394	HT_ATAC_1185
		chr1	155293480	155294362	RT4_ATAC_1186		chr21	15399491	15400677	SW_ATAC_1186		chr1	68962302	68963413	SC_ATAC_1186		chr1	84543130	84544404	HT_ATAC_1186
		chr1	155294992	155295201	RT4_ATAC_1187		chr2	157188426	157189859	SW_ATAC_1187		chr1	69285185	69285381	SC_ATAC_1187		chr1	84713160	84713735	HT_ATAC_1187
		chr1	155532603	155533147	RT4_ATAC_1188		chr18	11980449	11982218	SW_ATAC_1188		chr1	69347296	69347511	SC_ATAC_1188		chr1	84764100	84765176	HT_ATAC_1188
		chr1	155579543	155579645	RT4_ATAC_1189		chr3	88198281	88199728	SW_ATAC_1189		chr1	69347607	69347742	SC_ATAC_1189		chr1	84944701	84945670	HT_ATAC_1189
		chr1	155579755	155580096	RT4_ATAC_1190		chr2	187350044	187352054	SW_ATAC_1190		chr1	69381863	69382891	SC_ATAC_1190		chr1	84971009	84972619	HT_ATAC_1190
		chr1	155658381	155658982	RT4_ATAC_1191		chr3	113464027	113466483	SW_ATAC_1191		chr1	69439261	69439793	SC_ATAC_1191		chr1	85039559	85040483	HT_ATAC_1191
		chr1	155715123	155715682	RT4_ATAC_1192		chr12	97300403	97302224	SW_ATAC_1192		chr1	69574972	69575493	SC_ATAC_1192		chr1	85070077	85070505	HT_ATAC_1192
		chr1	155880930	155881360	RT4_ATAC_1193		chr11	111749149	111750538	SW_ATAC_1193		chr1	69898492	69899118	SC_ATAC_1193		chr1	85155324	85156726	HT_ATAC_1193
		chr1	155903910	155904515	RT4_ATAC_1194		chr2	101868724	101870042	SW_ATAC_1194		chr1	69959515	69960682	SC_ATAC_1194		chr1	85219335	85219484	HT_ATAC_1194
		chr1	156024332	156024888	RT4_ATAC_1195		chr9	15305968	15307885	SW_ATAC_1195		chr1	69979415	69979833	SC_ATAC_1195		chr1	85238140	85238645	HT_ATAC_1195
		chr1	156030810	156031038	RT4_ATAC_1196		chr4	186817823	186818901	SW_ATAC_1196		chr1	70032748	70034171	SC_ATAC_1196		chr1	85247728	85248640	HT_ATAC_1196
		chr1	156083947	156084793	RT4_ATAC_1197		chr1	47779104	47780740	SW_ATAC_1197		chr1	70159650	70160331	SC_ATAC_1197		chr1	85319937	85320647	HT_ATAC_1197
		chr1	156093530	156093852	RT4_ATAC_1198		chr20	5099977	5101067	SW_ATAC_1198		chr1	70354127	70354595	SC_ATAC_1198		chr1	85358350	85359284	HT_ATAC_1198
		chr1	156095930	156096391	RT4_ATAC_1199		chr16	25268121	25270063	SW_ATAC_1199		chr1	70376869	70377568	SC_ATAC_1199		chr1	85410455	85411119	HT_ATAC_1199
		chr1	156099935	156100387	RT4_ATAC_1200		chr19	36605346	36607010	SW_ATAC_1200		chr1	70413582	70413841	SC_ATAC_1200		chr1	85462444	85463507	HT_ATAC_1200
		chr1	156163323	156164000	RT4_ATAC_1201		chr3	157827325	157828719	SW_ATAC_1201		chr1	70500191	70500400	SC_ATAC_1201		chr1	85513480	85514613	HT_ATAC_1201
		chr1	156252213	156252429	RT4_ATAC_1202		chr17	11900014	11901230	SW_ATAC_1202		chr1	70503744	70504135	SC_ATAC_1202		chr1	85527422	85528473	HT_ATAC_1202
		chr1	156252531	156252864	RT4_ATAC_1203		chr4	71553436	71554955	SW_ATAC_1203		chr1	70509416	70510011	SC_ATAC_1203		chr1	85600515	85601416	HT_ATAC_1203
		chr1	156307819	156308697	RT4_ATAC_1204		chr5	94982223	94983279	SW_ATAC_1204		chr1	70556489	70556885	SC_ATAC_1204		chr1	85612288	85613006	HT_ATAC_1204
		chr1	156326712	156326995	RT4_ATAC_1205		chr1	192777126	192778636	SW_ATAC_1205		chr1	70670774	70671922	SC_ATAC_1205		chr1	85654124	85654701	HT_ATAC_1205
		chr1	156391348	156391722	RT4_ATAC_1206		chr13	106571271	106572158	SW_ATAC_1206		chr1	70686909	70687652	SC_ATAC_1206		chr1	85665862	85667855	HT_ATAC_1206
		chr1	156426301	156427599	RT4_ATAC_1207		chr2	9770550	9771660	SW_ATAC_1207		chr1	70819475	70820786	SC_ATAC_1207		chr1	85690492	85691330	HT_ATAC_1207
		chr1	156470407	156471391	RT4_ATAC_1208		chr1	90460203	90461301	SW_ATAC_1208		chr1	70876276	70877472	SC_ATAC_1208		chr1	85724205	85725889	HT_ATAC_1208
		chr1	156542092	156542516	RT4_ATAC_1209		chr5	79703194	79704549	SW_ATAC_1209		chr1	70975723	70976050	SC_ATAC_1209		chr1	85741551	85742748	HT_ATAC_1209
		chr1	156561204	156562007	RT4_ATAC_1210		chr13	103425218	103426502	SW_ATAC_1210		chr1	70993658	70994668	SC_ATAC_1210		chr1	85755023	85756159	HT_ATAC_1210
		chr1	156570839	156571559	RT4_ATAC_1211		chr20	32580480	32582456	SW_ATAC_1211		chr1	71546632	71547272	SC_ATAC_1211		chr1	85773686	85774416	HT_ATAC_1211
		chr1	156577959	156578121	RT4_ATAC_1212		chr16	81110180	81111426	SW_ATAC_1212		chr1	71551944	71552412	SC_ATAC_1212		chr1	85779510	85780500	HT_ATAC_1212
		chr1	156629839	156630401	RT4_ATAC_1213		chr11	22646249	22647712	SW_ATAC_1213		chr1	72087297	72087876	SC_ATAC_1213		chr1	85785680	85786775	HT_ATAC_1213
		chr1	156659362	156659501	RT4_ATAC_1214		chr11	126138138	126139658	SW_ATAC_1214		chr1	72528154	72528663	SC_ATAC_1214		chr1	85786929	85787103	HT_ATAC_1214
		chr1	156698125	156699007	RT4_ATAC_1215		chr2	84743076	84744076	SW_ATAC_1215		chr1	72748422	72748766	SC_ATAC_1215		chr1	85794352	85795052	HT_ATAC_1215
		chr1	156710648	156711344	RT4_ATAC_1216		chr2	11969420	11970748	SW_ATAC_1216		chr1	72748850	72749731	SC_ATAC_1216		chr1	85795765	85796332	HT_ATAC_1216
		chr1	156736881	156737387	RT4_ATAC_1217		chr20	52531792	52533356	SW_ATAC_1217		chr1	72831819	72832438	SC_ATAC_1217		chr1	85809556	85810259	HT_ATAC_1217
		chr1	157015301	157016030	RT4_ATAC_1218		chr3	3167986	3169566	SW_ATAC_1218		chr1	73357737	73357995	SC_ATAC_1218		chr1	85916614	85917848	HT_ATAC_1218
		chr1	157102301	157102820	RT4_ATAC_1219		chr7	56019211	56020272	SW_ATAC_1219		chr1	73358177	73358564	SC_ATAC_1219		chr1	85930021	85931223	HT_ATAC_1219
		chr1	157107639	157108578	RT4_ATAC_1220		chr5	112825016	112825448	SW_ATAC_1220		chr1	74038882	74039382	SC_ATAC_1220		chr1	85960955	85961577	HT_ATAC_1220
		chr1	157124567	157124996	RT4_ATAC_1221		chr13	76054812	76056912	SW_ATAC_1221		chr1	74058899	74059943	SC_ATAC_1221		chr1	85968363	85968740	HT_ATAC_1221
		chr1	157125099	157125318	RT4_ATAC_1222		chrX	153193059	153194203	SW_ATAC_1222		chr1	74139403	74139980	SC_ATAC_1222		chr1	86037579	86037890	HT_ATAC_1222
		chr1	157133519	157133844	RT4_ATAC_1223		chr1	235666848	235668993	SW_ATAC_1223		chr1	74140752	74140903	SC_ATAC_1223		chr1	86042273	86043024	HT_ATAC_1223
		chr1	157168430	157168748	RT4_ATAC_1224		chr11	112096636	112097992	SW_ATAC_1224		chr1	74324929	74325334	SC_ATAC_1224		chr1	86046245	86047455	HT_ATAC_1224
		chr1	157475350	157475742	RT4_ATAC_1225		chr6	7389493	7390633	SW_ATAC_1225		chr1	74475787	74476522	SC_ATAC_1225		chr1	86047768	86048346	HT_ATAC_1225
		chr1	157998586	157999138	RT4_ATAC_1226		chr5	32585481	32586497	SW_ATAC_1226		chr1	74663465	74664212	SC_ATAC_1226		chr1	86072649	86073319	HT_ATAC_1226
		chr1	158094844	158095084	RT4_ATAC_1227		chr12	133484631	133485805	SW_ATAC_1227		chr1	74688333	74689026	SC_ATAC_1227		chr1	86077539	86077905	HT_ATAC_1227
		chr1	158173691	158173828	RT4_ATAC_1228		chr11	107991822	107993157	SW_ATAC_1228		chr1	75118052	75119077	SC_ATAC_1228		chr1	86078311	86079142	HT_ATAC_1228
		chr1	158242286	158242971	RT4_ATAC_1229		chr7	148787343	148788862	SW_ATAC_1229		chr1	75198280	75199212	SC_ATAC_1229		chr1	86173242	86174749	HT_ATAC_1229
		chr1	158497068	158497289	RT4_ATAC_1230		chr3	29736304	29736685	SW_ATAC_1230		chr1	75199482	75199631	SC_ATAC_1230		chr1	86853700	86854323	HT_ATAC_1230
		chr1	158968582	158968944	RT4_ATAC_1231		chr12	133656557	133657881	SW_ATAC_1231		chr1	75841267	75841691	SC_ATAC_1231		chr1	86860524	86860692	HT_ATAC_1231
		chr1	158979461	158980136	RT4_ATAC_1232		chr16	31469291	31471452	SW_ATAC_1232		chr1	76098135	76098280	SC_ATAC_1232		chr1	86860961	86862319	HT_ATAC_1232
		chr1	158985383	158985545	RT4_ATAC_1233		chr1	67518458	67520300	SW_ATAC_1233		chr1	76189912	76190845	SC_ATAC_1233		chr1	86889263	86890065	HT_ATAC_1233
		chr1	159046370	159047514	RT4_ATAC_1234		chr7	124632550	124633761	SW_ATAC_1234		chr1	76251524	76252213	SC_ATAC_1234		chr1	86895576	86896394	HT_ATAC_1234
		chr1	159750370	159751185	RT4_ATAC_1235		chr2	73612491	73613754	SW_ATAC_1235		chr1	76262084	76263178	SC_ATAC_1235		chr1	86982902	86983435	HT_ATAC_1235
		chr1	159787461	159787705	RT4_ATAC_1236		chr7	66461085	66462159	SW_ATAC_1236		chr1	76540030	76540840	SC_ATAC_1236		chr1	87018016	87018611	HT_ATAC_1236
		chr1	159824206	159824914	RT4_ATAC_1237		chr17	58754584	58755734	SW_ATAC_1237		chr1	76619893	76620636	SC_ATAC_1237		chr1	87169705	87171208	HT_ATAC_1237
		chr1	159851579	159851997	RT4_ATAC_1238		chr11	114309823	114310953	SW_ATAC_1238		chr1	77366942	77367129	SC_ATAC_1238		chr1	87240033	87240252	HT_ATAC_1238
		chr1	159869845	159870494	RT4_ATAC_1239		chr6	119214322	119216520	SW_ATAC_1239		chr1	77436875	77437132	SC_ATAC_1239		chr1	87246156	87247047	HT_ATAC_1239
		chr1	159880136	159880809	RT4_ATAC_1240		chr5	167126132	167127549	SW_ATAC_1240		chr1	77464125	77464912	SC_ATAC_1240		chr1	87258549	87259254	HT_ATAC_1240
		chr1	159894014	159894648	RT4_ATAC_1241		chr2	39102216	39103835	SW_ATAC_1241		chr1	77471013	77471629	SC_ATAC_1241		chr1	87299165	87299605	HT_ATAC_1241
		chr1	159894983	159895848	RT4_ATAC_1242		chr3	43663175	43663990	SW_ATAC_1242		chr1	77505281	77506069	SC_ATAC_1242		chr1	87379540	87381588	HT_ATAC_1242
		chr1	159915322	159916071	RT4_ATAC_1243		chr6	46620293	46621316	SW_ATAC_1243		chr1	77533363	77534134	SC_ATAC_1243		chr1	87392510	87393070	HT_ATAC_1243
		chr1	159929151	159929546	RT4_ATAC_1244		chr2	188638677	188640607	SW_ATAC_1244		chr1	77592018	77592194	SC_ATAC_1244		chr1	87429893	87430580	HT_ATAC_1244
		chr1	160001115	160002125	RT4_ATAC_1245		chr6	160147503	160149169	SW_ATAC_1245		chr1	77684618	77685266	SC_ATAC_1245		chr1	87430864	87431200	HT_ATAC_1245
		chr1	160040052	160040605	RT4_ATAC_1246		chr3	158288358	158289674	SW_ATAC_1246		chr1	77878212	77878607	SC_ATAC_1246		chr1	87459039	87459552	HT_ATAC_1246
		chr1	160067726	160069138	RT4_ATAC_1247		chr1	181998332	181999533	SW_ATAC_1247		chr1	78148050	78148453	SC_ATAC_1247		chr1	87597497	87597919	HT_ATAC_1247
		chr1	160094393	160095151	RT4_ATAC_1248		chr3	5019787	5021459	SW_ATAC_1248		chr1	78148564	78149573	SC_ATAC_1248		chr1	87606006	87607390	HT_ATAC_1248
		chr1	160146957	160147722	RT4_ATAC_1249		chr3	118752984	118754316	SW_ATAC_1249		chr1	78224760	78225693	SC_ATAC_1249		chr1	87615259	87615720	HT_ATAC_1249
		chr1	160175398	160175762	RT4_ATAC_1250		chr14	57045875	57047059	SW_ATAC_1250		chr1	78245167	78245980	SC_ATAC_1250		chr1	87691665	87692455	HT_ATAC_1250
		chr1	160175848	160176117	RT4_ATAC_1251		chr2	25264131	25265396	SW_ATAC_1251		chr1	78291063	78291308	SC_ATAC_1251		chr1	87715270	87715923	HT_ATAC_1251
		chr1	160231368	160232086	RT4_ATAC_1252		chr5	102090234	102092096	SW_ATAC_1252		chr1	78354206	78355205	SC_ATAC_1252		chr1	87716084	87716476	HT_ATAC_1252
		chr1	160232178	160232531	RT4_ATAC_1253		chr1	206137190	206138545	SW_ATAC_1253		chr1	78355315	78355711	SC_ATAC_1253		chr1	87793839	87795346	HT_ATAC_1253
		chr1	160253871	160254251	RT4_ATAC_1254		chr14	105956803	105958306	SW_ATAC_1254		chr1	78443865	78444156	SC_ATAC_1254		chr1	87796935	87797855	HT_ATAC_1254
		chr1	160254643	160255067	RT4_ATAC_1255		chr8	54857349	54858498	SW_ATAC_1255		chr1	78444326	78445313	SC_ATAC_1255		chr1	87800695	87801441	HT_ATAC_1255
		chr1	160261213	160261370	RT4_ATAC_1256		chr14	50998588	51000270	SW_ATAC_1256		chr1	78469747	78470257	SC_ATAC_1256		chr1	87858379	87858750	HT_ATAC_1256
		chr1	160312615	160313572	RT4_ATAC_1257		chr9	124461582	124463629	SW_ATAC_1257		chr1	78470394	78470684	SC_ATAC_1257		chr1	87870035	87870303	HT_ATAC_1257
		chr1	160651326	160651751	RT4_ATAC_1258		chr4	73934223	73935984	SW_ATAC_1258		chr1	78536102	78536850	SC_ATAC_1258		chr1	87916433	87917222	HT_ATAC_1258
		chr1	160695983	160696874	RT4_ATAC_1259		chr20	54933716	54935368	SW_ATAC_1259		chr1	78558466	78558677	SC_ATAC_1259		chr1	87938465	87939480	HT_ATAC_1259
		chr1	160737406	160738370	RT4_ATAC_1260		chr4	106394142	106395616	SW_ATAC_1260		chr1	78579716	78580351	SC_ATAC_1260		chr1	88004644	88005716	HT_ATAC_1260
		chr1	160751212	160751650	RT4_ATAC_1261		chr2	74880854	74881975	SW_ATAC_1261		chr1	78608625	78609348	SC_ATAC_1261		chr1	88260811	88261501	HT_ATAC_1261
		chr1	160783079	160783323	RT4_ATAC_1262		chr13	108869783	108871603	SW_ATAC_1262		chr1	78642061	78642806	SC_ATAC_1262		chr1	88300742	88301283	HT_ATAC_1262
		chr1	160796338	160796623	RT4_ATAC_1263		chr3	108307836	108308987	SW_ATAC_1263		chr1	78703264	78703762	SC_ATAC_1263		chr1	88501373	88502438	HT_ATAC_1263
		chr1	160881286	160881697	RT4_ATAC_1264		chr1	197871230	197872422	SW_ATAC_1264		chr1	78769279	78769788	SC_ATAC_1264		chr1	88646309	88646456	HT_ATAC_1264
		chr1	160983276	160983907	RT4_ATAC_1265		chr5	10249369	10251298	SW_ATAC_1265		chr1	78805022	78805581	SC_ATAC_1265		chr1	89060999	89061326	HT_ATAC_1265
		chr1	160990407	160990788	RT4_ATAC_1266		chr8	82597951	82598773	SW_ATAC_1266		chr1	78805667	78806409	SC_ATAC_1266		chr1	89149325	89149441	HT_ATAC_1266
		chr1	160990873	160991357	RT4_ATAC_1267		chr1	55007590	55008891	SW_ATAC_1267		chr1	79115363	79115609	SC_ATAC_1267		chr1	89149597	89150788	HT_ATAC_1267
		chr1	161014916	161015515	RT4_ATAC_1268		chr2	128642402	128644417	SW_ATAC_1268		chr1	79158159	79158642	SC_ATAC_1268		chr1	89239322	89240260	HT_ATAC_1268
		chr1	161015602	161015881	RT4_ATAC_1269		chr7	112739213	112740606	SW_ATAC_1269		chr1	79518659	79518800	SC_ATAC_1269		chr1	89347946	89348177	HT_ATAC_1269
		chr1	161044397	161045072	RT4_ATAC_1270		chr6	127587583	127589157	SW_ATAC_1270		chr1	79545520	79545950	SC_ATAC_1270		chr1	89356433	89357957	HT_ATAC_1270
		chr1	161053088	161053651	RT4_ATAC_1271		chr6	121655490	121656771	SW_ATAC_1271		chr1	79566059	79566570	SC_ATAC_1271		chr1	89358215	89358476	HT_ATAC_1271
		chr1	161087248	161088249	RT4_ATAC_1272		chr5	122371455	122373042	SW_ATAC_1272		chr1	79571265	79571550	SC_ATAC_1272		chr1	89439152	89439877	HT_ATAC_1272
		chr1	161102166	161103148	RT4_ATAC_1273		chr4	57842482	57844464	SW_ATAC_1273		chr1	79658855	79659420	SC_ATAC_1273		chr1	89449605	89451064	HT_ATAC_1273
		chr1	161128911	161129034	RT4_ATAC_1274		chr4	66106778	66108416	SW_ATAC_1274		chr1	79664612	79664822	SC_ATAC_1274		chr1	89457292	89457837	HT_ATAC_1274
		chr1	161129120	161129725	RT4_ATAC_1275		chr20	52258993	52260013	SW_ATAC_1275		chr1	79788721	79789318	SC_ATAC_1275		chr1	89458033	89458979	HT_ATAC_1275
		chr1	161135569	161136403	RT4_ATAC_1276		chr18	29671702	29673491	SW_ATAC_1276		chr1	80519740	80520213	SC_ATAC_1276		chr1	89464304	89464662	HT_ATAC_1276
		chr1	161146710	161147673	RT4_ATAC_1277		chr6	97371954	97373200	SW_ATAC_1277		chr1	80858136	80858735	SC_ATAC_1277		chr1	89467291	89467474	HT_ATAC_1277
		chr1	161162396	161162748	RT4_ATAC_1278		chr2	200775236	200776901	SW_ATAC_1278		chr1	81584267	81584636	SC_ATAC_1278		chr1	89487296	89488641	HT_ATAC_1278
		chr1	161171716	161172271	RT4_ATAC_1279		chr2	128283629	128285249	SW_ATAC_1279		chr1	81584803	81585467	SC_ATAC_1279		chr1	89530419	89531502	HT_ATAC_1279
		chr1	161195378	161195925	RT4_ATAC_1280		chr6	52284618	52285905	SW_ATAC_1280		chr1	81639780	81641055	SC_ATAC_1280		chr1	89591356	89592148	HT_ATAC_1280
		chr1	161205938	161206502	RT4_ATAC_1281		chr8	37159458	37160805	SW_ATAC_1281		chr1	81644924	81645293	SC_ATAC_1281		chr1	89594620	89594724	HT_ATAC_1281
		chr1	161228378	161228963	RT4_ATAC_1282		chr4	153856795	153858500	SW_ATAC_1282		chr1	81652016	81652399	SC_ATAC_1282		chr1	89664200	89664756	HT_ATAC_1282
		chr1	161284022	161284274	RT4_ATAC_1283		chr15	44828198	44830032	SW_ATAC_1283		chr1	81771733	81771861	SC_ATAC_1283		chr1	89727411	89727896	HT_ATAC_1283
		chr1	161359461	161360184	RT4_ATAC_1284		chr2	190444898	190446798	SW_ATAC_1284		chr1	81975211	81976035	SC_ATAC_1284		chr1	89920496	89920989	HT_ATAC_1284
		chr1	161369026	161369919	RT4_ATAC_1285		chr4	177240418	177241969	SW_ATAC_1285		chr1	82147248	82147626	SC_ATAC_1285		chr1	89989621	89991242	HT_ATAC_1285
		chr1	161410235	161410557	RT4_ATAC_1286		chr4	184908358	184909565	SW_ATAC_1286		chr1	82164979	82165575	SC_ATAC_1286		chr1	90064503	90065224	HT_ATAC_1286
		chr1	161493629	161494522	RT4_ATAC_1287		chr1	78702537	78703979	SW_ATAC_1287		chr1	82168654	82168896	SC_ATAC_1287		chr1	90098284	90099212	HT_ATAC_1287
		chr1	161500049	161500256	RT4_ATAC_1288		chr2	204623780	204625293	SW_ATAC_1288		chr1	82266977	82267189	SC_ATAC_1288		chr1	90099361	90099598	HT_ATAC_1288
		chr1	161500414	161501137	RT4_ATAC_1289		chr18	13137091	13138814	SW_ATAC_1289		chr1	82267657	82268822	SC_ATAC_1289		chr1	90174661	90175039	HT_ATAC_1289
		chr1	161509609	161510322	RT4_ATAC_1290		chr1	224690542	224692040	SW_ATAC_1290		chr1	82691000	82692305	SC_ATAC_1290		chr1	90228150	90229195	HT_ATAC_1290
		chr1	161535998	161536621	RT4_ATAC_1291		chr8	37887645	37889397	SW_ATAC_1291		chr1	82854299	82854646	SC_ATAC_1291		chr1	90270307	90270476	HT_ATAC_1291
		chr1	161541603	161542323	RT4_ATAC_1292		chr11	73308824	73310184	SW_ATAC_1292		chr1	83444748	83444902	SC_ATAC_1292		chr1	90273995	90274627	HT_ATAC_1292
		chr1	161581961	161583038	RT4_ATAC_1293		chr8	96036615	96038134	SW_ATAC_1293		chr1	83499413	83499861	SC_ATAC_1293		chr1	90286011	90287501	HT_ATAC_1293
		chr1	161695961	161696094	RT4_ATAC_1294		chr2	63815156	63816448	SW_ATAC_1294		chr1	83521125	83521449	SC_ATAC_1294		chr1	90308470	90310019	HT_ATAC_1294
		chr1	161696367	161697244	RT4_ATAC_1295		chr7	140396183	140397468	SW_ATAC_1295		chr1	83552006	83552604	SC_ATAC_1295		chr1	90355609	90356592	HT_ATAC_1295
		chr1	161719387	161720209	RT4_ATAC_1296		chr4	39528598	39529946	SW_ATAC_1296		chr1	83616763	83617276	SC_ATAC_1296		chr1	90359838	90359952	HT_ATAC_1296
		chr1	161735102	161735249	RT4_ATAC_1297		chr3	141943720	141944796	SW_ATAC_1297		chr1	83629633	83630305	SC_ATAC_1297		chr1	90376202	90377001	HT_ATAC_1297
		chr1	161993308	161993823	RT4_ATAC_1298		chr6	74362860	74364822	SW_ATAC_1298		chr1	84326155	84327053	SC_ATAC_1298		chr1	90460248	90461384	HT_ATAC_1298
		chr1	162039282	162040465	RT4_ATAC_1299		chr17	53498066	53499834	SW_ATAC_1299		chr1	84367288	84367855	SC_ATAC_1299		chr1	90868638	90869217	HT_ATAC_1299
		chr1	162122181	162122536	RT4_ATAC_1300		chr5	90575444	90576799	SW_ATAC_1300		chr1	84464424	84465207	SC_ATAC_1300		chr1	91044511	91045529	HT_ATAC_1300
		chr1	162177067	162177593	RT4_ATAC_1301		chr3	141867419	141868749	SW_ATAC_1301		chr1	84543217	84544580	SC_ATAC_1301		chr1	91172516	91172762	HT_ATAC_1301
		chr1	162254862	162255663	RT4_ATAC_1302		chr19	36705038	36706400	SW_ATAC_1302		chr1	84555033	84555595	SC_ATAC_1302		chr1	91316517	91317864	HT_ATAC_1302
		chr1	162467335	162467727	RT4_ATAC_1303		chr12	40719209	40720551	SW_ATAC_1303		chr1	84621788	84622293	SC_ATAC_1303		chr1	91460864	91461465	HT_ATAC_1303
		chr1	162467809	162468273	RT4_ATAC_1304		chr5	17228658	17229769	SW_ATAC_1304		chr1	84639798	84640299	SC_ATAC_1304		chr1	91480835	91481482	HT_ATAC_1304
		chr1	162530502	162532018	RT4_ATAC_1305		chr4	113557782	113559102	SW_ATAC_1305		chr1	84712963	84713876	SC_ATAC_1305		chr1	91486578	91488001	HT_ATAC_1305
		chr1	162583547	162584095	RT4_ATAC_1306		chr6	148512552	148513312	SW_ATAC_1306		chr1	84738037	84738356	SC_ATAC_1306		chr1	91630578	91631094	HT_ATAC_1306
		chr1	162666061	162666598	RT4_ATAC_1307		chr18	14131634	14132759	SW_ATAC_1307		chr1	84764100	84765035	SC_ATAC_1307		chr1	91631747	91632079	HT_ATAC_1307
		chr1	162666978	162667140	RT4_ATAC_1308		chr6	74289284	74290889	SW_ATAC_1308		chr1	84831028	84831802	SC_ATAC_1308		chr1	91869704	91870442	HT_ATAC_1308
		chr1	162760137	162761083	RT4_ATAC_1309		chr12	69201125	69203086	SW_ATAC_1309		chr1	84944866	84945024	SC_ATAC_1309		chr1	91966080	91967552	HT_ATAC_1309
		chr1	162771745	162771830	RT4_ATAC_1310		chr16	75018358	75019405	SW_ATAC_1310		chr1	84945120	84945534	SC_ATAC_1310		chr1	92022270	92023188	HT_ATAC_1310
		chr1	162843614	162844463	RT4_ATAC_1311		chr4	330545	332143	SW_ATAC_1311		chr1	84971307	84972615	SC_ATAC_1311		chr1	92035209	92035832	HT_ATAC_1311
		chr1	162883009	162883082	RT4_ATAC_1312		chr5	151136867	151138733	SW_ATAC_1312		chr1	85039472	85040477	SC_ATAC_1312		chr1	92074444	92074912	HT_ATAC_1312
		chr1	162883183	162883846	RT4_ATAC_1313		chr11	85374840	85376535	SW_ATAC_1313		chr1	85069407	85070494	SC_ATAC_1313		chr1	92075071	92075816	HT_ATAC_1313
		chr1	163291465	163292110	RT4_ATAC_1314		chr2	73297698	73299070	SW_ATAC_1314		chr1	85086220	85086987	SC_ATAC_1314		chr1	92201869	92203212	HT_ATAC_1314
		chr1	163331025	163331197	RT4_ATAC_1315		chr12	16108959	16110083	SW_ATAC_1315		chr1	85100323	85100958	SC_ATAC_1315		chr1	92273704	92274442	HT_ATAC_1315
		chr1	164527977	164528511	RT4_ATAC_1316		chr12	66695617	66696908	SW_ATAC_1316		chr1	85155544	85156595	SC_ATAC_1316		chr1	92295718	92296207	HT_ATAC_1316
		chr1	164571080	164571217	RT4_ATAC_1317		chr1	65431528	65432678	SW_ATAC_1317		chr1	85164218	85164627	SC_ATAC_1317		chr1	92329719	92330519	HT_ATAC_1317
		chr1	164571297	164571581	RT4_ATAC_1318		chr13	86372790	86373945	SW_ATAC_1318		chr1	85215606	85216225	SC_ATAC_1318		chr1	92337277	92337932	HT_ATAC_1318
		chr1	164580874	164581525	RT4_ATAC_1319		chr10	43931790	43933060	SW_ATAC_1319		chr1	85245600	85246370	SC_ATAC_1319		chr1	92343731	92344427	HT_ATAC_1319
		chr1	164582556	164582667	RT4_ATAC_1320		chr2	203498984	203501087	SW_ATAC_1320		chr1	85300098	85300626	SC_ATAC_1320		chr1	92350309	92352150	HT_ATAC_1320
		chr1	164592297	164592652	RT4_ATAC_1321		chr1	89989609	89991193	SW_ATAC_1321		chr1	85308408	85308999	SC_ATAC_1321		chr1	92355689	92356061	HT_ATAC_1321
		chr1	164628814	164629968	RT4_ATAC_1322		chr1	167690311	167691933	SW_ATAC_1322		chr1	85312969	85313754	SC_ATAC_1322		chr1	92378596	92380199	HT_ATAC_1322
		chr1	164688584	164689541	RT4_ATAC_1323		chr11	88070102	88071897	SW_ATAC_1323		chr1	85319864	85320556	SC_ATAC_1323		chr1	92545596	92546834	HT_ATAC_1323
		chr1	164740853	164741203	RT4_ATAC_1324		chr4	120549493	120550559	SW_ATAC_1324		chr1	85358099	85359210	SC_ATAC_1324		chr1	92757041	92757237	HT_ATAC_1324
		chr1	164741975	164742345	RT4_ATAC_1325		chr6	97730215	97731718	SW_ATAC_1325		chr1	85410461	85410616	SC_ATAC_1325		chr1	92763871	92765140	HT_ATAC_1325
		chr1	164756621	164757495	RT4_ATAC_1326		chr12	88535356	88536854	SW_ATAC_1326		chr1	85410709	85410925	SC_ATAC_1326		chr1	92907455	92907816	HT_ATAC_1326
		chr1	165085844	165086494	RT4_ATAC_1327		chr8	82023114	82024820	SW_ATAC_1327		chr1	85411014	85411169	SC_ATAC_1327		chr1	92909911	92910253	HT_ATAC_1327
		chr1	165098881	165099294	RT4_ATAC_1328		chr3	142719382	142721401	SW_ATAC_1328		chr1	85462203	85463041	SC_ATAC_1328		chr1	92912573	92913146	HT_ATAC_1328
		chr1	165113927	165114320	RT4_ATAC_1329		chr14	91526538	91527585	SW_ATAC_1329		chr1	85527558	85528297	SC_ATAC_1329		chr1	92951194	92951805	HT_ATAC_1329
		chr1	165122030	165122223	RT4_ATAC_1330		chr1	78443833	78444156	SW_ATAC_1330		chr1	85666053	85667220	SC_ATAC_1330		chr1	92951985	92952239	HT_ATAC_1330
		chr1	165131526	165132590	RT4_ATAC_1331		chr12	63125565	63126505	SW_ATAC_1331		chr1	85667312	85667894	SC_ATAC_1331		chr1	93119044	93119931	HT_ATAC_1331
		chr1	165311555	165312199	RT4_ATAC_1332		chr1	174127902	174129597	SW_ATAC_1332		chr1	85690482	85691539	SC_ATAC_1332		chr1	93249765	93251617	HT_ATAC_1332
		chr1	165364875	165365114	RT4_ATAC_1333		chr14	60631177	60632390	SW_ATAC_1333		chr1	85724826	85725527	SC_ATAC_1333		chr1	93285483	93285860	HT_ATAC_1333
		chr1	165508568	165509062	RT4_ATAC_1334		chr15	52970343	52972095	SW_ATAC_1334		chr1	85741808	85742744	SC_ATAC_1334		chr1	93286011	93286084	HT_ATAC_1334
		chr1	165567200	165567677	RT4_ATAC_1335		chr3	180319393	180320652	SW_ATAC_1335		chr1	85755007	85755686	SC_ATAC_1335		chr1	93297022	93298578	HT_ATAC_1335
		chr1	165599949	165600805	RT4_ATAC_1336		chr6	146864351	146865589	SW_ATAC_1336		chr1	85760646	85760938	SC_ATAC_1336		chr1	93324318	93325166	HT_ATAC_1336
		chr1	165601185	165601571	RT4_ATAC_1337		chr16	75466731	75468336	SW_ATAC_1337		chr1	85763443	85764434	SC_ATAC_1337		chr1	93373690	93373802	HT_ATAC_1337
		chr1	165667146	165668144	RT4_ATAC_1338		chr1	213188135	213189535	SW_ATAC_1338		chr1	85773882	85774136	SC_ATAC_1338		chr1	93426016	93427736	HT_ATAC_1338
		chr1	165737720	165738346	RT4_ATAC_1339		chr12	107167782	107169027	SW_ATAC_1339		chr1	85794393	85795060	SC_ATAC_1339		chr1	93544413	93545715	HT_ATAC_1339
		chr1	165738430	165738576	RT4_ATAC_1340		chr12	54673360	54674792	SW_ATAC_1340		chr1	85804641	85805440	SC_ATAC_1340		chr1	93545868	93546296	HT_ATAC_1340
		chr1	165796627	165797734	RT4_ATAC_1341		chr6	99872588	99874231	SW_ATAC_1341		chr1	85930332	85931329	SC_ATAC_1341		chr1	93645159	93646827	HT_ATAC_1341
		chr1	165857212	165857393	RT4_ATAC_1342		chr13	41634211	41636348	SW_ATAC_1342		chr1	85960673	85960816	SC_ATAC_1342		chr1	93787811	93788241	HT_ATAC_1342
		chr1	166135943	166136667	RT4_ATAC_1343		chr2	163174274	163175715	SW_ATAC_1343		chr1	85961130	85961788	SC_ATAC_1343		chr1	93804030	93804455	HT_ATAC_1343
		chr1	166323628	166324012	RT4_ATAC_1344		chr12	125401667	125402404	SW_ATAC_1344		chr1	85986635	85987597	SC_ATAC_1344		chr1	93810525	93812561	HT_ATAC_1344
		chr1	166347904	166348524	RT4_ATAC_1345		chr5	65891824	65893001	SW_ATAC_1345		chr1	85992774	85993315	SC_ATAC_1345		chr1	93865246	93865909	HT_ATAC_1345
		chr1	166458858	166459706	RT4_ATAC_1346		chr7	72935628	72937295	SW_ATAC_1346		chr1	86021815	86022310	SC_ATAC_1346		chr1	93913181	93914949	HT_ATAC_1346
		chr1	166572314	166572903	RT4_ATAC_1347		chr5	36744232	36745855	SW_ATAC_1347		chr1	86037561	86038163	SC_ATAC_1347		chr1	94050629	94051400	HT_ATAC_1347
		chr1	166808310	166808883	RT4_ATAC_1348		chr5	171432738	171434488	SW_ATAC_1348		chr1	86042213	86043085	SC_ATAC_1348		chr1	94058634	94058838	HT_ATAC_1348
		chr1	166808996	166809498	RT4_ATAC_1349		chr8	66546008	66546933	SW_ATAC_1349		chr1	86046277	86046745	SC_ATAC_1349		chr1	94059442	94059685	HT_ATAC_1349
		chr1	166844877	166845877	RT4_ATAC_1350		chr15	23033550	23035191	SW_ATAC_1350		chr1	86047951	86048330	SC_ATAC_1350		chr1	94063301	94063641	HT_ATAC_1350
		chr1	167013031	167013616	RT4_ATAC_1351		chr12	97962200	97963236	SW_ATAC_1351		chr1	86072631	86073429	SC_ATAC_1351		chr1	94082280	94083123	HT_ATAC_1351
		chr1	167051777	167052396	RT4_ATAC_1352		chr15	102263978	102264964	SW_ATAC_1352		chr1	86077547	86077949	SC_ATAC_1352		chr1	94086401	94086678	HT_ATAC_1352
		chr1	167189721	167190235	RT4_ATAC_1353		chr6	86302621	86304566	SW_ATAC_1353		chr1	86088626	86089190	SC_ATAC_1353		chr1	94089103	94090110	HT_ATAC_1353
		chr1	167411290	167411657	RT4_ATAC_1354		chr4	47464795	47466096	SW_ATAC_1354		chr1	86173572	86174776	SC_ATAC_1354		chr1	94091163	94091423	HT_ATAC_1354
		chr1	167416744	167417303	RT4_ATAC_1355		chr6	79576762	79578298	SW_ATAC_1355		chr1	86315826	86316706	SC_ATAC_1355		chr1	94095176	94095476	HT_ATAC_1355
		chr1	167424023	167424979	RT4_ATAC_1356		chr5	128795954	128797644	SW_ATAC_1356		chr1	86860974	86862165	SC_ATAC_1356		chr1	94103710	94104316	HT_ATAC_1356
		chr1	167522303	167523340	RT4_ATAC_1357		chr18	71814735	71815868	SW_ATAC_1357		chr1	86887715	86887853	SC_ATAC_1357		chr1	94104492	94105105	HT_ATAC_1357
		chr1	167632260	167632571	RT4_ATAC_1358		chr8	37962093	37963759	SW_ATAC_1358		chr1	86889279	86889863	SC_ATAC_1358		chr1	94129883	94130625	HT_ATAC_1358
		chr1	167683401	167684541	RT4_ATAC_1359		chr5	148205302	148206606	SW_ATAC_1359		chr1	86895551	86896596	SC_ATAC_1359		chr1	94132348	94132537	HT_ATAC_1359
		chr1	167690864	167691262	RT4_ATAC_1360		chr6	18155181	18156679	SW_ATAC_1360		chr1	87012350	87013062	SC_ATAC_1360		chr1	94133276	94133445	HT_ATAC_1360
		chr1	167691361	167691633	RT4_ATAC_1361		chr16	57653398	57654792	SW_ATAC_1361		chr1	87102496	87103159	SC_ATAC_1361		chr1	94138543	94139222	HT_ATAC_1361
		chr1	167691724	167691906	RT4_ATAC_1362		chr10	35415328	35416886	SW_ATAC_1362		chr1	87169709	87171212	SC_ATAC_1362		chr1	94146310	94147776	HT_ATAC_1362
		chr1	167905024	167905625	RT4_ATAC_1363		chr5	41924904	41926240	SW_ATAC_1363		chr1	87239379	87240370	SC_ATAC_1363		chr1	94158356	94159496	HT_ATAC_1363
		chr1	167905728	167906090	RT4_ATAC_1364		chr11	85358253	85359778	SW_ATAC_1364		chr1	87245026	87245628	SC_ATAC_1364		chr1	94166890	94168623	HT_ATAC_1364
		chr1	168051559	168051763	RT4_ATAC_1365		chr3	9791087	9792220	SW_ATAC_1365		chr1	87246510	87246875	SC_ATAC_1365		chr1	94188654	94189027	HT_ATAC_1365
		chr1	168082071	168082497	RT4_ATAC_1366		chr18	3623450	3624585	SW_ATAC_1366		chr1	87253972	87254840	SC_ATAC_1366		chr1	94203710	94204332	HT_ATAC_1366
		chr1	168147894	168148702	RT4_ATAC_1367		chr4	48342715	48344257	SW_ATAC_1367		chr1	87311619	87312303	SC_ATAC_1367		chr1	94204481	94204861	HT_ATAC_1367
		chr1	168195089	168195875	RT4_ATAC_1368		chr8	127569579	127571180	SW_ATAC_1368		chr1	87379739	87379865	SC_ATAC_1368		chr1	94205061	94205401	HT_ATAC_1368
		chr1	168311793	168312218	RT4_ATAC_1369		chr2	74684500	74685760	SW_ATAC_1369		chr1	87379962	87380599	SC_ATAC_1369		chr1	94221444	94221602	HT_ATAC_1369
		chr1	168535163	168535456	RT4_ATAC_1370		chr5	36875935	36877837	SW_ATAC_1370		chr1	87380683	87381602	SC_ATAC_1370		chr1	94240706	94241099	HT_ATAC_1370
		chr1	168721350	168721835	RT4_ATAC_1371		chr3	146261338	146262843	SW_ATAC_1371		chr1	87558899	87558972	SC_ATAC_1371		chr1	94244561	94244653	HT_ATAC_1371
		chr1	168876124	168876998	RT4_ATAC_1372		chr7	66205270	66206602	SW_ATAC_1372		chr1	87559078	87559248	SC_ATAC_1372		chr1	94244913	94246111	HT_ATAC_1372
		chr1	168908823	168909066	RT4_ATAC_1373		chr5	85913380	85914843	SW_ATAC_1373		chr1	87597497	87597881	SC_ATAC_1373		chr1	94270014	94270338	HT_ATAC_1373
		chr1	169074851	169075223	RT4_ATAC_1374		chr2	46925441	46926849	SW_ATAC_1374		chr1	87617483	87618170	SC_ATAC_1374		chr1	94270573	94271101	HT_ATAC_1374
		chr1	169075358	169076094	RT4_ATAC_1375		chr1	220921201	220922301	SW_ATAC_1375		chr1	87689917	87690281	SC_ATAC_1375		chr1	94278640	94279049	HT_ATAC_1375
		chr1	169085169	169085761	RT4_ATAC_1376		chr5	71603507	71604552	SW_ATAC_1376		chr1	87691717	87692528	SC_ATAC_1376		chr1	94279615	94279831	HT_ATAC_1376
		chr1	169281361	169281754	RT4_ATAC_1377		chr5	21459126	21460117	SW_ATAC_1377		chr1	87793825	87794684	SC_ATAC_1377		chr1	94283823	94284448	HT_ATAC_1377
		chr1	169336959	169337261	RT4_ATAC_1378		chr3	161033580	161034715	SW_ATAC_1378		chr1	87796921	87797446	SC_ATAC_1378		chr1	94293520	94293813	HT_ATAC_1378
		chr1	169337350	169337554	RT4_ATAC_1379		chr2	182756096	182757647	SW_ATAC_1379		chr1	87864433	87865317	SC_ATAC_1379		chr1	94293973	94294207	HT_ATAC_1379
		chr1	169443267	169443520	RT4_ATAC_1380		chr1	100731123	100732419	SW_ATAC_1380		chr1	88110245	88110952	SC_ATAC_1380		chr1	94311670	94313716	HT_ATAC_1380
		chr1	169454717	169455644	RT4_ATAC_1381		chr4	159592123	159594274	SW_ATAC_1381		chr1	88149721	88150640	SC_ATAC_1381		chr1	94344031	94344927	HT_ATAC_1381
		chr1	169498595	169499019	RT4_ATAC_1382		chr5	36240994	36242638	SW_ATAC_1382		chr1	88183914	88184545	SC_ATAC_1382		chr1	94374221	94375515	HT_ATAC_1382
		chr1	169534907	169535594	RT4_ATAC_1383		chr3	148803370	148804695	SW_ATAC_1383		chr1	88260679	88261268	SC_ATAC_1383		chr1	94402025	94402165	HT_ATAC_1383
		chr1	169555629	169555832	RT4_ATAC_1384		chr10	86087888	86089332	SW_ATAC_1384		chr1	88271432	88272312	SC_ATAC_1384		chr1	94511089	94511559	HT_ATAC_1384
		chr1	169680629	169680967	RT4_ATAC_1385		chr6	56407091	56408290	SW_ATAC_1385		chr1	88335197	88335860	SC_ATAC_1385		chr1	94533628	94534243	HT_ATAC_1385
		chr1	169681071	169681450	RT4_ATAC_1386		chr2	3522173	3523632	SW_ATAC_1386		chr1	88526607	88527112	SC_ATAC_1386		chr1	94566325	94567677	HT_ATAC_1386
		chr1	169763762	169764477	RT4_ATAC_1387		chr14	78226623	78228271	SW_ATAC_1387		chr1	88527267	88527423	SC_ATAC_1387		chr1	94583135	94584415	HT_ATAC_1387
		chr1	169860282	169860490	RT4_ATAC_1388		chr1	63832749	63834096	SW_ATAC_1388		chr1	88793403	88793815	SC_ATAC_1388		chr1	94596311	94596722	HT_ATAC_1388
		chr1	169860574	169860729	RT4_ATAC_1389		chr8	680451	681879	SW_ATAC_1389		chr1	89073939	89074279	SC_ATAC_1389		chr1	94702383	94703589	HT_ATAC_1389
		chr1	169862369	169863236	RT4_ATAC_1390		chr2	74756223	74757242	SW_ATAC_1390		chr1	89149598	89150808	SC_ATAC_1390		chr1	94712402	94713538	HT_ATAC_1390
		chr1	169863353	169863558	RT4_ATAC_1391		chr1	53791364	53793168	SW_ATAC_1391		chr1	89239333	89240270	SC_ATAC_1391		chr1	94724203	94724900	HT_ATAC_1391
		chr1	169911501	169912004	RT4_ATAC_1392		chr2	214148850	214149845	SW_ATAC_1392		chr1	89240403	89240495	SC_ATAC_1392		chr1	94765384	94766517	HT_ATAC_1392
		chr1	170043525	170044121	RT4_ATAC_1393		chr11	133826075	133827570	SW_ATAC_1393		chr1	89356592	89356707	SC_ATAC_1393		chr1	94790871	94792168	HT_ATAC_1393
		chr1	170500886	170501824	RT4_ATAC_1394		chr14	50052566	50053869	SW_ATAC_1394		chr1	89356802	89357779	SC_ATAC_1394		chr1	94801478	94801712	HT_ATAC_1394
		chr1	170532254	170532419	RT4_ATAC_1395		chr12	62996104	62997713	SW_ATAC_1395		chr1	89450710	89451670	SC_ATAC_1395		chr1	94883429	94885051	HT_ATAC_1395
		chr1	170898833	170899189	RT4_ATAC_1396		chr11	124542848	124544452	SW_ATAC_1396		chr1	89458078	89459032	SC_ATAC_1396		chr1	95005201	95005448	HT_ATAC_1396
		chr1	171283050	171283419	RT4_ATAC_1397		chr3	132440510	132442276	SW_ATAC_1397		chr1	89488045	89488639	SC_ATAC_1397		chr1	95006201	95008163	HT_ATAC_1397
		chr1	171454214	171454341	RT4_ATAC_1398		chr3	87039497	87040960	SW_ATAC_1398		chr1	89530542	89531419	SC_ATAC_1398		chr1	95045297	95045839	HT_ATAC_1398
		chr1	171454428	171454744	RT4_ATAC_1399		chr2	211034653	211036578	SW_ATAC_1399		chr1	89591361	89591961	SC_ATAC_1399		chr1	95082025	95082492	HT_ATAC_1399
		chr1	171454838	171455535	RT4_ATAC_1400		chr17	56594867	56595783	SW_ATAC_1400		chr1	89664019	89664813	SC_ATAC_1400		chr1	95087000	95087371	HT_ATAC_1400
		chr1	171509749	171509836	RT4_ATAC_1401		chr11	57060262	57061307	SW_ATAC_1401		chr1	89740118	89740573	SC_ATAC_1401		chr1	95088234	95088637	HT_ATAC_1401
		chr1	171614141	171614661	RT4_ATAC_1402		chr16	55702037	55703276	SW_ATAC_1402		chr1	89828798	89829061	SC_ATAC_1402		chr1	95111685	95112598	HT_ATAC_1402
		chr1	171710967	171711964	RT4_ATAC_1403		chr7	91569457	91571137	SW_ATAC_1403		chr1	89829246	89829508	SC_ATAC_1403		chr1	95113594	95114028	HT_ATAC_1403
		chr1	171750238	171750899	RT4_ATAC_1404		chr1	60279947	60281400	SW_ATAC_1404		chr1	89829639	89830106	SC_ATAC_1404		chr1	95164009	95164938	HT_ATAC_1404
		chr1	172291372	172292129	RT4_ATAC_1405		chr5	131131933	131133432	SW_ATAC_1405		chr1	89918737	89919281	SC_ATAC_1405		chr1	95178958	95179590	HT_ATAC_1405
		chr1	172321522	172321881	RT4_ATAC_1406		chr5	118690735	118692174	SW_ATAC_1406		chr1	89930787	89931377	SC_ATAC_1406		chr1	95193330	95194154	HT_ATAC_1406
		chr1	172412802	172413558	RT4_ATAC_1407		chr21	18899536	18900535	SW_ATAC_1407		chr1	89931512	89932138	SC_ATAC_1407		chr1	95267493	95268163	HT_ATAC_1407
		chr1	172445016	172445845	RT4_ATAC_1408		chr4	119606316	119607101	SW_ATAC_1408		chr1	89989656	89991014	SC_ATAC_1408		chr1	95285497	95286669	HT_ATAC_1408
		chr1	172482353	172483065	RT4_ATAC_1409		chr14	35514887	35516348	SW_ATAC_1409		chr1	90013253	90013634	SC_ATAC_1409		chr1	95320008	95321300	HT_ATAC_1409
		chr1	172501280	172501411	RT4_ATAC_1410		chr1	86173558	86174820	SW_ATAC_1410		chr1	90081345	90082745	SC_ATAC_1410		chr1	95328125	95329182	HT_ATAC_1410
		chr1	172501511	172501763	RT4_ATAC_1411		chr5	126852858	126854286	SW_ATAC_1411		chr1	90098238	90099221	SC_ATAC_1411		chr1	95329580	95330036	HT_ATAC_1411
		chr1	172501864	172502733	RT4_ATAC_1412		chr12	117175515	117176454	SW_ATAC_1412		chr1	90137669	90138274	SC_ATAC_1412		chr1	95330433	95330610	HT_ATAC_1412
		chr1	172557897	172558429	RT4_ATAC_1413		chr7	83176550	83177677	SW_ATAC_1413		chr1	90204689	90205528	SC_ATAC_1413		chr1	95349641	95350006	HT_ATAC_1413
		chr1	172608077	172608982	RT4_ATAC_1414		chr5	56204958	56206382	SW_ATAC_1414		chr1	90228616	90228844	SC_ATAC_1414		chr1	95391136	95393516	HT_ATAC_1414
		chr1	173031289	173031713	RT4_ATAC_1415		chr8	29939514	29941122	SW_ATAC_1415		chr1	90273818	90274652	SC_ATAC_1415		chr1	95417097	95417613	HT_ATAC_1415
		chr1	173159822	173160091	RT4_ATAC_1416		chr8	126010029	126011288	SW_ATAC_1416		chr1	90286192	90287467	SC_ATAC_1416		chr1	95508849	95509439	HT_ATAC_1416
		chr1	173399102	173399490	RT4_ATAC_1417		chr4	123072934	123074501	SW_ATAC_1417		chr1	90292098	90292591	SC_ATAC_1417		chr1	95537747	95538961	HT_ATAC_1417
		chr1	173445805	173447486	RT4_ATAC_1418		chr6	81163387	81165198	SW_ATAC_1418		chr1	90308445	90309673	SC_ATAC_1418		chr1	95582177	95583571	HT_ATAC_1418
		chr1	173476254	173476956	RT4_ATAC_1419		chr20	30153499	30155263	SW_ATAC_1419		chr1	90331432	90331948	SC_ATAC_1419		chr1	95634169	95635611	HT_ATAC_1419
		chr1	173683941	173684766	RT4_ATAC_1420		chr13	77600297	77601752	SW_ATAC_1420		chr1	90355614	90356286	SC_ATAC_1420		chr1	95698909	95700533	HT_ATAC_1420
		chr1	173793096	173794253	RT4_ATAC_1421		chr2	162100467	162102026	SW_ATAC_1421		chr1	90440644	90440997	SC_ATAC_1421		chr1	96827953	96828795	HT_ATAC_1421
		chr1	173836701	173837961	RT4_ATAC_1422		chr2	106443684	106444720	SW_ATAC_1422		chr1	90460220	90461263	SC_ATAC_1422		chr1	96939406	96939881	HT_ATAC_1422
		chr1	173990685	173991856	RT4_ATAC_1423		chr14	62161702	62163196	SW_ATAC_1423		chr1	90539625	90540457	SC_ATAC_1423		chr1	97186790	97188433	HT_ATAC_1423
		chr1	174122798	174122949	RT4_ATAC_1424		chr2	62080836	62082578	SW_ATAC_1424		chr1	90868594	90869034	SC_ATAC_1424		chr1	97310745	97311456	HT_ATAC_1424
		chr1	174128271	174129369	RT4_ATAC_1425		chr11	124615772	124617202	SW_ATAC_1425		chr1	91286723	91287653	SC_ATAC_1425		chr1	97432010	97432366	HT_ATAC_1425
		chr1	174768399	174769031	RT4_ATAC_1426		chr4	103747984	103749767	SW_ATAC_1426		chr1	91317094	91317372	SC_ATAC_1426		chr1	97559705	97560420	HT_ATAC_1426
		chr1	174844462	174844709	RT4_ATAC_1427		chr2	197790296	197792103	SW_ATAC_1427		chr1	91486862	91488000	SC_ATAC_1427		chr1	97603757	97604119	HT_ATAC_1427
		chr1	174882475	174883446	RT4_ATAC_1428		chr6	86351630	86354043	SW_ATAC_1428		chr1	91966116	91966489	SC_ATAC_1428		chr1	97639684	97640116	HT_ATAC_1428
		chr1	174968359	174969473	RT4_ATAC_1429		chr7	8300940	8302366	SW_ATAC_1429		chr1	91966578	91967362	SC_ATAC_1429		chr1	97657996	97658993	HT_ATAC_1429
		chr1	174992086	174992862	RT4_ATAC_1430		chr15	26326990	26328326	SW_ATAC_1430		chr1	92270053	92270682	SC_ATAC_1430		chr1	98378983	98379805	HT_ATAC_1430
		chr1	174998543	174998704	RT4_ATAC_1431		chr8	80996483	80997105	SW_ATAC_1431		chr1	92329680	92330319	SC_ATAC_1431		chr1	98385903	98387162	HT_ATAC_1431
		chr1	174998894	174999159	RT4_ATAC_1432		chr13	107187481	107188585	SW_ATAC_1432		chr1	92350976	92351960	SC_ATAC_1432		chr1	98403171	98404007	HT_ATAC_1432
		chr1	175161815	175162371	RT4_ATAC_1433		chr6	52528884	52529792	SW_ATAC_1433		chr1	92545572	92546571	SC_ATAC_1433		chr1	98464690	98465731	HT_ATAC_1433
		chr1	176175766	176176943	RT4_ATAC_1434		chr6	105073239	105074249	SW_ATAC_1434		chr1	92764042	92765072	SC_ATAC_1434		chr1	98470963	98471608	HT_ATAC_1434
		chr1	176213915	176214250	RT4_ATAC_1435		chr7	75987406	75988946	SW_ATAC_1435		chr1	92949915	92951618	SC_ATAC_1435		chr1	98510366	98512049	HT_ATAC_1435
		chr1	176491680	176491940	RT4_ATAC_1436		chr7	150812937	150814327	SW_ATAC_1436		chr1	92951712	92951840	SC_ATAC_1436		chr1	98519081	98520098	HT_ATAC_1436
		chr1	176665242	176665638	RT4_ATAC_1437		chr4	120375386	120376248	SW_ATAC_1437		chr1	93042614	93043089	SC_ATAC_1437		chr1	98552303	98552935	HT_ATAC_1437
		chr1	177139881	177140468	RT4_ATAC_1438		chr12	69978992	69979831	SW_ATAC_1438		chr1	93049402	93049683	SC_ATAC_1438		chr1	98788660	98788832	HT_ATAC_1438
		chr1	177554491	177555257	RT4_ATAC_1439		chr5	106906648	106908302	SW_ATAC_1439		chr1	93049829	93050308	SC_ATAC_1439		chr1	98788994	98789205	HT_ATAC_1439
		chr1	177558342	177558568	RT4_ATAC_1440		chr2	178416667	178417946	SW_ATAC_1440		chr1	93064892	93064999	SC_ATAC_1440		chr1	98789395	98789916	HT_ATAC_1440
		chr1	177580338	177580816	RT4_ATAC_1441		chr9	40791150	40792462	SW_ATAC_1441		chr1	93119381	93119911	SC_ATAC_1441		chr1	98808143	98808613	HT_ATAC_1441
		chr1	178001034	178001228	RT4_ATAC_1442		chr7	32767335	32769033	SW_ATAC_1442		chr1	93250143	93251249	SC_ATAC_1442		chr1	99126794	99128108	HT_ATAC_1442
		chr1	178062508	178062978	RT4_ATAC_1443		chr17	57183418	57184817	SW_ATAC_1443		chr1	93284037	93284155	SC_ATAC_1443		chr1	99204833	99205615	HT_ATAC_1443
		chr1	178063068	178063887	RT4_ATAC_1444		chr8	30514534	30516193	SW_ATAC_1444		chr1	93297376	93298093	SC_ATAC_1444		chr1	99645916	99646353	HT_ATAC_1444
		chr1	178279820	178280253	RT4_ATAC_1445		chr5	9467364	9468549	SW_ATAC_1445		chr1	93313496	93314340	SC_ATAC_1445		chr1	99729508	99730520	HT_ATAC_1445
		chr1	178310393	178310738	RT4_ATAC_1446		chr12	90102485	90104106	SW_ATAC_1446		chr1	93324510	93324742	SC_ATAC_1446		chr1	99922787	99923817	HT_ATAC_1446
		chr1	178387009	178387347	RT4_ATAC_1447		chr1	151253656	151255594	SW_ATAC_1447		chr1	93373564	93373852	SC_ATAC_1447		chr1	99930764	99931351	HT_ATAC_1447
		chr1	178403360	178403894	RT4_ATAC_1448		chr3	160938642	160940261	SW_ATAC_1448		chr1	93374699	93375955	SC_ATAC_1448		chr1	100002914	100003773	HT_ATAC_1448
		chr1	178505981	178506504	RT4_ATAC_1449		chr3	157217045	157218302	SW_ATAC_1449		chr1	93399036	93399577	SC_ATAC_1449		chr1	100004004	100004533	HT_ATAC_1449
		chr1	178511700	178512561	RT4_ATAC_1450		chr2	12316428	12318006	SW_ATAC_1450		chr1	93415567	93417119	SC_ATAC_1450		chr1	100045630	100046645	HT_ATAC_1450
		chr1	178624912	178625421	RT4_ATAC_1451		chr8	128866028	128867202	SW_ATAC_1451		chr1	93426029	93426418	SC_ATAC_1451		chr1	100065248	100065844	HT_ATAC_1451
		chr1	178694216	178694807	RT4_ATAC_1452		chr13	41567890	41569494	SW_ATAC_1452		chr1	93426550	93427765	SC_ATAC_1452		chr1	100110828	100112219	HT_ATAC_1452
		chr1	178694907	178695078	RT4_ATAC_1453		chr4	171010389	171011596	SW_ATAC_1453		chr1	93427887	93428277	SC_ATAC_1453		chr1	100113776	100113960	HT_ATAC_1453
		chr1	178916645	178917159	RT4_ATAC_1454		chr8	54933927	54935904	SW_ATAC_1454		chr1	93434116	93434238	SC_ATAC_1454		chr1	100124998	100125864	HT_ATAC_1454
		chr1	178986090	178986503	RT4_ATAC_1455		chr2	202315717	202317115	SW_ATAC_1455		chr1	93438408	93439058	SC_ATAC_1455		chr1	100151147	100151703	HT_ATAC_1455
		chr1	178994637	178996042	RT4_ATAC_1456		chr13	46626190	46627881	SW_ATAC_1456		chr1	93480854	93481629	SC_ATAC_1456		chr1	100173033	100173549	HT_ATAC_1456
		chr1	179006326	179006584	RT4_ATAC_1457		chr2	14428136	14428908	SW_ATAC_1457		chr1	93508054	93508653	SC_ATAC_1457		chr1	100231297	100232539	HT_ATAC_1457
		chr1	179050719	179051859	RT4_ATAC_1458		chr18	71958394	71959737	SW_ATAC_1458		chr1	93527867	93528232	SC_ATAC_1458		chr1	100274101	100274726	HT_ATAC_1458
		chr1	179198147	179199319	RT4_ATAC_1459		chr2	14772397	14773953	SW_ATAC_1459		chr1	93544405	93545245	SC_ATAC_1459		chr1	100315097	100316264	HT_ATAC_1459
		chr1	179262736	179263306	RT4_ATAC_1460		chr4	103789526	103790962	SW_ATAC_1460		chr1	93546058	93546294	SC_ATAC_1460		chr1	100434885	100436267	HT_ATAC_1460
		chr1	179334774	179334924	RT4_ATAC_1461		chr14	50328418	50330139	SW_ATAC_1461		chr1	93645140	93646550	SC_ATAC_1461		chr1	100436866	100437016	HT_ATAC_1461
		chr1	179335010	179335388	RT4_ATAC_1462		chr3	133291853	133292888	SW_ATAC_1462		chr1	93787959	93788340	SC_ATAC_1462		chr1	100503135	100504779	HT_ATAC_1462
		chr1	179783750	179784780	RT4_ATAC_1463		chr9	88896548	88898331	SW_ATAC_1463		chr1	93790218	93791393	SC_ATAC_1463		chr1	100597893	100599388	HT_ATAC_1463
		chr1	179846869	179847063	RT4_ATAC_1464		chr8	95486775	95487912	SW_ATAC_1464		chr1	93803835	93804941	SC_ATAC_1464		chr1	100714412	100715818	HT_ATAC_1464
		chr1	179851103	179852381	RT4_ATAC_1465		chr15	48623078	48624681	SW_ATAC_1465		chr1	93810708	93811925	SC_ATAC_1465		chr1	100731218	100732751	HT_ATAC_1465
		chr1	179900106	179900439	RT4_ATAC_1466		chr8	103423931	103425324	SW_ATAC_1466		chr1	93812052	93812503	SC_ATAC_1466		chr1	100816892	100818907	HT_ATAC_1466
		chr1	179923375	179924617	RT4_ATAC_1467		chr18	30050046	30051576	SW_ATAC_1467		chr1	93873833	93874236	SC_ATAC_1467		chr1	100819642	100819823	HT_ATAC_1467
		chr1	180123536	180124089	RT4_ATAC_1468		chr1	157107282	157108805	SW_ATAC_1468		chr1	93913142	93914949	SC_ATAC_1468		chr1	100820604	100820728	HT_ATAC_1468
		chr1	180137124	180137622	RT4_ATAC_1469		chr5	69696770	69697562	SW_ATAC_1469		chr1	93919561	93919933	SC_ATAC_1469		chr1	101004727	101005771	HT_ATAC_1469
		chr1	180198626	180199183	RT4_ATAC_1470		chr8	48872420	48874258	SW_ATAC_1470		chr1	93973984	93975518	SC_ATAC_1470		chr1	101300737	101300839	HT_ATAC_1470
		chr1	180471123	180472164	RT4_ATAC_1471		chr14	61447315	61449059	SW_ATAC_1471		chr1	93984882	93985692	SC_ATAC_1471		chr1	101360150	101361931	HT_ATAC_1471
		chr1	180485035	180485562	RT4_ATAC_1472		chr6	71276391	71277104	SW_ATAC_1472		chr1	94058633	94058863	SC_ATAC_1472		chr1	101362092	101362488	HT_ATAC_1472
		chr1	180490636	180491064	RT4_ATAC_1473		chr15	33359977	33361510	SW_ATAC_1473		chr1	94063155	94063828	SC_ATAC_1473		chr1	101490845	101492196	HT_ATAC_1473
		chr1	180491186	180491698	RT4_ATAC_1474		chr16	29465047	29466519	SW_ATAC_1474		chr1	94071450	94072013	SC_ATAC_1474		chr1	101541404	101541805	HT_ATAC_1474
		chr1	180532263	180532452	RT4_ATAC_1475		chr2	61990834	61991960	SW_ATAC_1475		chr1	94080584	94081079	SC_ATAC_1475		chr1	101704415	101705507	HT_ATAC_1475
		chr1	180548876	180549713	RT4_ATAC_1476		chr10	116697614	116698652	SW_ATAC_1476		chr1	94082210	94082485	SC_ATAC_1476		chr1	101753901	101754415	HT_ATAC_1476
		chr1	180554725	180555103	RT4_ATAC_1477		chr1	209989080	209990175	SW_ATAC_1477		chr1	94089126	94089951	SC_ATAC_1477		chr1	101774688	101775050	HT_ATAC_1477
		chr1	180600930	180601872	RT4_ATAC_1478		chr20	37100732	37102163	SW_ATAC_1478		chr1	94129911	94130853	SC_ATAC_1478		chr1	101823054	101823562	HT_ATAC_1478
		chr1	180796470	180796841	RT4_ATAC_1479		chr5	14011103	14012138	SW_ATAC_1479		chr1	94138737	94139248	SC_ATAC_1479		chr1	102033272	102033572	HT_ATAC_1479
		chr1	180991570	180992162	RT4_ATAC_1480		chr18	61033557	61035317	SW_ATAC_1480		chr1	94145747	94146201	SC_ATAC_1480		chr1	103345009	103345588	HT_ATAC_1480
		chr1	180992289	180992442	RT4_ATAC_1481		chr1	201139573	201140695	SW_ATAC_1481		chr1	94146300	94147810	SC_ATAC_1481		chr1	103362411	103363407	HT_ATAC_1481
		chr1	181002304	181002633	RT4_ATAC_1482		chr13	38922887	38924605	SW_ATAC_1482		chr1	94157971	94158813	SC_ATAC_1482		chr1	103406641	103407622	HT_ATAC_1482
		chr1	181002953	181003181	RT4_ATAC_1483		chr13	50365978	50367755	SW_ATAC_1483		chr1	94158897	94159418	SC_ATAC_1483		chr1	104067532	104069146	HT_ATAC_1483
		chr1	181013482	181014281	RT4_ATAC_1484		chr18	48723635	48724911	SW_ATAC_1484		chr1	94159649	94160061	SC_ATAC_1484		chr1	104615551	104616653	HT_ATAC_1484
		chr1	181057625	181058269	RT4_ATAC_1485		chr1	164741792	164742320	SW_ATAC_1485		chr1	94167138	94168381	SC_ATAC_1485		chr1	107347663	107347853	HT_ATAC_1485
		chr1	181074144	181074812	RT4_ATAC_1486		chr14	34529028	34530174	SW_ATAC_1486		chr1	94168469	94168706	SC_ATAC_1486		chr1	107599010	107600539	HT_ATAC_1486
		chr1	181081582	181081979	RT4_ATAC_1487		chr20	21105927	21107329	SW_ATAC_1487		chr1	94203634	94204357	SC_ATAC_1487		chr1	107683941	107684343	HT_ATAC_1487
		chr1	181086767	181087192	RT4_ATAC_1488		chr2	85829365	85830861	SW_ATAC_1488		chr1	94219692	94220316	SC_ATAC_1488		chr1	107684611	107685149	HT_ATAC_1488
		chr1	181088464	181088791	RT4_ATAC_1489		chr1	91486686	91488029	SW_ATAC_1489		chr1	94240332	94241099	SC_ATAC_1489		chr1	108073695	108074353	HT_ATAC_1489
		chr1	181104123	181104471	RT4_ATAC_1490		chr12	26427373	26428535	SW_ATAC_1490		chr1	94245074	94246107	SC_ATAC_1490		chr1	108186269	108186699	HT_ATAC_1490
		chr1	181128438	181128869	RT4_ATAC_1491		chr12	9101881	9102990	SW_ATAC_1491		chr1	94279488	94279825	SC_ATAC_1491		chr1	108190788	108190967	HT_ATAC_1491
		chr1	181998471	181999491	RT4_ATAC_1492		chr4	56261576	56262836	SW_ATAC_1492		chr1	94311435	94312426	SC_ATAC_1492		chr1	108225798	108226144	HT_ATAC_1492
		chr1	182038165	182038381	RT4_ATAC_1493		chr13	86082919	86084348	SW_ATAC_1493		chr1	94312546	94313251	SC_ATAC_1493		chr1	108226426	108226566	HT_ATAC_1493
		chr1	182054116	182054353	RT4_ATAC_1494		chr7	156685008	156686537	SW_ATAC_1494		chr1	94313363	94313682	SC_ATAC_1494		chr1	108230687	108230777	HT_ATAC_1494
		chr1	182070496	182070840	RT4_ATAC_1495		chr5	6765694	6766147	SW_ATAC_1495		chr1	94344070	94345293	SC_ATAC_1495		chr1	108231053	108231479	HT_ATAC_1495
		chr1	182070962	182071106	RT4_ATAC_1496		chr8	50707814	50709103	SW_ATAC_1496		chr1	94374086	94375567	SC_ATAC_1496		chr1	108479036	108479946	HT_ATAC_1496
		chr1	182113097	182113764	RT4_ATAC_1497		chr3	75483967	75485114	SW_ATAC_1497		chr1	94430053	94430698	SC_ATAC_1497		chr1	108507207	108507865	HT_ATAC_1497
		chr1	182135527	182135750	RT4_ATAC_1498		chr3	178788767	178790291	SW_ATAC_1498		chr1	94454170	94454960	SC_ATAC_1498		chr1	108508201	108508621	HT_ATAC_1498
		chr1	182144513	182144935	RT4_ATAC_1499		chr4	148538096	148539432	SW_ATAC_1499		chr1	94486741	94487036	SC_ATAC_1499		chr1	108550058	108550915	HT_ATAC_1499
		chr1	182150287	182150972	RT4_ATAC_1500		chr4	168818153	168818892	SW_ATAC_1500		chr1	94511158	94511570	SC_ATAC_1500		chr1	108588073	108589149	HT_ATAC_1500
		chr1	182359878	182361339	RT4_ATAC_1501		chr12	60660098	60660672	SW_ATAC_1501		chr1	94527077	94527257	SC_ATAC_1501		chr1	108660813	108661394	HT_ATAC_1501
		chr1	182557894	182558607	RT4_ATAC_1502		chr7	134331253	134332155	SW_ATAC_1502		chr1	94547293	94547940	SC_ATAC_1502		chr1	108742422	108743306	HT_ATAC_1502
		chr1	182572881	182573959	RT4_ATAC_1503		chr19	36544697	36546463	SW_ATAC_1503		chr1	94566762	94567492	SC_ATAC_1503		chr1	108743470	108743665	HT_ATAC_1503
		chr1	182612963	182613169	RT4_ATAC_1504		chr12	76424540	76426715	SW_ATAC_1504		chr1	94702021	94702136	SC_ATAC_1504		chr1	108759567	108759886	HT_ATAC_1504
		chr1	182672366	182672999	RT4_ATAC_1505		chr1	115211805	115213494	SW_ATAC_1505		chr1	94702268	94703594	SC_ATAC_1505		chr1	109102408	109102736	HT_ATAC_1505
		chr1	182758357	182759000	RT4_ATAC_1506		chr14	73493099	73494504	SW_ATAC_1506		chr1	94712176	94713491	SC_ATAC_1506		chr1	109112842	109113217	HT_ATAC_1506
		chr1	182808244	182808981	RT4_ATAC_1507		chr7	149320433	149322348	SW_ATAC_1507		chr1	94724065	94724894	SC_ATAC_1507		chr1	109203206	109204260	HT_ATAC_1507
		chr1	182809080	182809252	RT4_ATAC_1508		chr7	51330953	51332059	SW_ATAC_1508		chr1	94736136	94736807	SC_ATAC_1508		chr1	109234367	109236280	HT_ATAC_1508
		chr1	182931768	182932008	RT4_ATAC_1509		chr12	27090622	27092105	SW_ATAC_1509		chr1	94765435	94766386	SC_ATAC_1509		chr1	109262399	109263083	HT_ATAC_1509
		chr1	182992115	182993323	RT4_ATAC_1510		chr5	159848663	159849493	SW_ATAC_1510		chr1	94790879	94791862	SC_ATAC_1510		chr1	109289017	109290178	HT_ATAC_1510
		chr1	183029591	183029894	RT4_ATAC_1511		chr8	42010073	42011228	SW_ATAC_1511		chr1	94801481	94801710	SC_ATAC_1511		chr1	109358761	109359478	HT_ATAC_1511
		chr1	183128914	183129467	RT4_ATAC_1512		chr7	29603214	29604791	SW_ATAC_1512		chr1	94883493	94884476	SC_ATAC_1512		chr1	109370834	109371450	HT_ATAC_1512
		chr1	183154938	183155677	RT4_ATAC_1513		chr4	108817275	108818013	SW_ATAC_1513		chr1	95006754	95007653	SC_ATAC_1513		chr1	109373037	109373574	HT_ATAC_1513
		chr1	183203556	183204169	RT4_ATAC_1514		chr5	27241674	27242753	SW_ATAC_1514		chr1	95045246	95046086	SC_ATAC_1514		chr1	109388236	109389038	HT_ATAC_1514
		chr1	183204273	183204392	RT4_ATAC_1515		chr5	111563579	111565293	SW_ATAC_1515		chr1	95086996	95087341	SC_ATAC_1515		chr1	109419237	109420318	HT_ATAC_1515
		chr1	183287632	183287881	RT4_ATAC_1516		chr8	94766852	94767748	SW_ATAC_1516		chr1	95088240	95088746	SC_ATAC_1516		chr1	109420600	109420746	HT_ATAC_1516
		chr1	183387234	183387617	RT4_ATAC_1517		chr11	107710860	107712089	SW_ATAC_1517		chr1	95089062	95089527	SC_ATAC_1517		chr1	109505180	109505503	HT_ATAC_1517
		chr1	183440208	183440703	RT4_ATAC_1518		chr20	13780696	13781848	SW_ATAC_1518		chr1	95113654	95114068	SC_ATAC_1518		chr1	109505687	109506452	HT_ATAC_1518
		chr1	183440793	183441722	RT4_ATAC_1519		chrX	23919120	23919650	SW_ATAC_1519		chr1	95119330	95120066	SC_ATAC_1519		chr1	109583553	109583725	HT_ATAC_1519
		chr1	183604275	183605502	RT4_ATAC_1520		chr17	13972069	13973474	SW_ATAC_1520		chr1	95179081	95179631	SC_ATAC_1520		chr1	109583883	109585136	HT_ATAC_1520
		chr1	183668699	183669477	RT4_ATAC_1521		chr11	129872047	129873768	SW_ATAC_1521		chr1	95193114	95194154	SC_ATAC_1521		chr1	109592617	109593652	HT_ATAC_1521
		chr1	183773991	183774820	RT4_ATAC_1522		chr2	61403964	61405346	SW_ATAC_1522		chr1	95234993	95235539	SC_ATAC_1522		chr1	109618151	109618939	HT_ATAC_1522
		chr1	183811557	183811935	RT4_ATAC_1523		chr12	27676435	27677678	SW_ATAC_1523		chr1	95267587	95267829	SC_ATAC_1523		chr1	109631918	109632121	HT_ATAC_1523
		chr1	183840267	183840668	RT4_ATAC_1524		chr11	108368055	108369443	SW_ATAC_1524		chr1	95285496	95286352	SC_ATAC_1524		chr1	109632841	109634078	HT_ATAC_1524
		chr1	183850889	183851231	RT4_ATAC_1525		chr8	62671817	62673446	SW_ATAC_1525		chr1	95320028	95321136	SC_ATAC_1525		chr1	109642529	109643382	HT_ATAC_1525
		chr1	183861459	183862115	RT4_ATAC_1526		chr20	52748538	52749798	SW_ATAC_1526		chr1	95328133	95328619	SC_ATAC_1526		chr1	109655168	109655774	HT_ATAC_1526
		chr1	183925931	183926345	RT4_ATAC_1527		chr7	39772643	39774013	SW_ATAC_1527		chr1	95329580	95330050	SC_ATAC_1527		chr1	109704926	109705194	HT_ATAC_1527
		chr1	184006151	184006909	RT4_ATAC_1528		chr3	118960329	118960620	SW_ATAC_1528		chr1	95391118	95391618	SC_ATAC_1528		chr1	109705364	109705446	HT_ATAC_1528
		chr1	184020354	184021342	RT4_ATAC_1529		chr12	14818061	14819681	SW_ATAC_1529		chr1	95391701	95392952	SC_ATAC_1529		chr1	109739925	109740536	HT_ATAC_1529
		chr1	184355571	184356921	RT4_ATAC_1530		chr12	101800554	101802645	SW_ATAC_1530		chr1	95504861	95505155	SC_ATAC_1530		chr1	109756183	109757280	HT_ATAC_1530
		chr1	184559244	184559827	RT4_ATAC_1531		chr17	54910458	54912616	SW_ATAC_1531		chr1	95509045	95509236	SC_ATAC_1531		chr1	109768763	109768906	HT_ATAC_1531
		chr1	184723290	184724587	RT4_ATAC_1532		chr5	34838624	34839849	SW_ATAC_1532		chr1	95538113	95539043	SC_ATAC_1532		chr1	109782620	109783721	HT_ATAC_1532
		chr1	184898957	184900045	RT4_ATAC_1533		chr2	120770012	120771345	SW_ATAC_1533		chr1	95582176	95583447	SC_ATAC_1533		chr1	109792004	109792968	HT_ATAC_1533
		chr1	184923338	184923775	RT4_ATAC_1534		chr20	55181008	55182176	SW_ATAC_1534		chr1	95699193	95700356	SC_ATAC_1534		chr1	109805724	109806627	HT_ATAC_1534
		chr1	184942814	184943857	RT4_ATAC_1535		chr4	102277101	102278582	SW_ATAC_1535		chr1	96012528	96013163	SC_ATAC_1535		chr1	109825200	109826458	HT_ATAC_1535
		chr1	185014058	185015202	RT4_ATAC_1536		chr13	91999184	92001691	SW_ATAC_1536		chr1	96019983	96020319	SC_ATAC_1536		chr1	109940028	109941424	HT_ATAC_1536
		chr1	185065621	185065958	RT4_ATAC_1537		chr3	168134238	168135842	SW_ATAC_1537		chr1	96188760	96189273	SC_ATAC_1537		chr1	109968454	109969533	HT_ATAC_1537
		chr1	185125785	185125939	RT4_ATAC_1538		chr9	88555633	88556793	SW_ATAC_1538		chr1	96196319	96196929	SC_ATAC_1538		chr1	110025989	110027280	HT_ATAC_1538
		chr1	185126025	185126689	RT4_ATAC_1539		chr18	3247128	3248239	SW_ATAC_1539		chr1	96208144	96208880	SC_ATAC_1539		chr1	110036349	110037217	HT_ATAC_1539
		chr1	185139383	185139833	RT4_ATAC_1540		chr2	38373362	38374964	SW_ATAC_1540		chr1	96828133	96828624	SC_ATAC_1540		chr1	110051862	110052688	HT_ATAC_1540
		chr1	185227061	185227179	RT4_ATAC_1541		chr8	135843615	135845495	SW_ATAC_1541		chr1	96836097	96836787	SC_ATAC_1541		chr1	110074700	110075325	HT_ATAC_1541
		chr1	185285326	185285525	RT4_ATAC_1542		chr2	131112779	131114192	SW_ATAC_1542		chr1	96881593	96882312	SC_ATAC_1542		chr1	110090459	110091934	HT_ATAC_1542
		chr1	185286160	185286999	RT4_ATAC_1543		chr9	125693213	125694659	SW_ATAC_1543		chr1	96939149	96940257	SC_ATAC_1543		chr1	110162120	110162510	HT_ATAC_1543
		chr1	185373456	185373588	RT4_ATAC_1544		chr3	15642539	15644002	SW_ATAC_1544		chr1	97025562	97026113	SC_ATAC_1544		chr1	110162758	110163911	HT_ATAC_1544
		chr1	185565316	185565488	RT4_ATAC_1545		chrX	15352672	15354472	SW_ATAC_1545		chr1	97186944	97188060	SC_ATAC_1545		chr1	110282421	110283470	HT_ATAC_1545
		chr1	185615318	185616022	RT4_ATAC_1546		chr3	5740311	5741853	SW_ATAC_1546		chr1	97559373	97560465	SC_ATAC_1546		chr1	110526781	110528140	HT_ATAC_1546
		chr1	186124885	186125032	RT4_ATAC_1547		chr3	101280313	101281024	SW_ATAC_1547		chr1	97603940	97604122	SC_ATAC_1547		chr1	110576840	110578167	HT_ATAC_1547
		chr1	186344110	186345075	RT4_ATAC_1548		chr2	20646524	20648085	SW_ATAC_1548		chr1	97610179	97610374	SC_ATAC_1548		chr1	110739612	110739813	HT_ATAC_1548
		chr1	186345176	186345318	RT4_ATAC_1549		chr9	108455870	108457784	SW_ATAC_1549		chr1	97658314	97659082	SC_ATAC_1549		chr1	110752672	110753916	HT_ATAC_1549
		chr1	186373688	186373885	RT4_ATAC_1550		chr4	128630107	128630985	SW_ATAC_1550		chr1	97743256	97744132	SC_ATAC_1550		chr1	110778232	110778673	HT_ATAC_1550
		chr1	186461652	186461952	RT4_ATAC_1551		chr4	153699975	153701913	SW_ATAC_1551		chr1	98372473	98372707	SC_ATAC_1551		chr1	110880813	110882528	HT_ATAC_1551
		chr1	186462042	186462423	RT4_ATAC_1552		chr3	156877018	156878892	SW_ATAC_1552		chr1	98385918	98387150	SC_ATAC_1552		chr1	110949881	110950837	HT_ATAC_1552
		chr1	186535363	186535568	RT4_ATAC_1553		chr4	87927330	87928757	SW_ATAC_1553		chr1	98403223	98403993	SC_ATAC_1553		chr1	111019718	111020514	HT_ATAC_1553
		chr1	186546288	186546644	RT4_ATAC_1554		chr20	56010491	56011370	SW_ATAC_1554		chr1	98510746	98511160	SC_ATAC_1554		chr1	111067905	111068435	HT_ATAC_1554
		chr1	186587607	186587804	RT4_ATAC_1555		chr4	186391818	186393268	SW_ATAC_1555		chr1	98519379	98520298	SC_ATAC_1555		chr1	111162067	111162442	HT_ATAC_1555
		chr1	186627678	186628348	RT4_ATAC_1556		chr2	201390544	201391415	SW_ATAC_1556		chr1	98608881	98608988	SC_ATAC_1556		chr1	111313570	111314518	HT_ATAC_1556
		chr1	186649147	186650161	RT4_ATAC_1557		chr6	47445100	47446668	SW_ATAC_1557		chr1	98609075	98609240	SC_ATAC_1557		chr1	111459310	111459907	HT_ATAC_1557
		chr1	186797744	186798166	RT4_ATAC_1558		chr8	6263164	6265074	SW_ATAC_1558		chr1	98685470	98685846	SC_ATAC_1558		chr1	111505650	111506243	HT_ATAC_1558
		chr1	186798441	186798583	RT4_ATAC_1559		chr5	34585430	34586983	SW_ATAC_1559		chr1	98788679	98788838	SC_ATAC_1559		chr1	111506441	111506929	HT_ATAC_1559
		chr1	186817565	186818197	RT4_ATAC_1560		chr8	76319229	76321119	SW_ATAC_1560		chr1	98788953	98789293	SC_ATAC_1560		chr1	111682248	111683444	HT_ATAC_1560
		chr1	186896866	186897500	RT4_ATAC_1561		chr4	169239406	169240121	SW_ATAC_1561		chr1	98789431	98789952	SC_ATAC_1561		chr1	111745068	111745240	HT_ATAC_1561
		chr1	186951161	186951780	RT4_ATAC_1562		chr7	104652871	104653725	SW_ATAC_1562		chr1	99126783	99128109	SC_ATAC_1562		chr1	111746258	111747414	HT_ATAC_1562
		chr1	186979619	186979733	RT4_ATAC_1563		chr1	197169422	197171387	SW_ATAC_1563		chr1	99142871	99143283	SC_ATAC_1563		chr1	111765561	111766314	HT_ATAC_1563
		chr1	186979828	186980316	RT4_ATAC_1564		chr1	227751045	227752008	SW_ATAC_1564		chr1	99205171	99205747	SC_ATAC_1564		chr1	111888720	111889540	HT_ATAC_1564
		chr1	187007910	187008416	RT4_ATAC_1565		chr1	111505802	111506970	SW_ATAC_1565		chr1	99259936	99260263	SC_ATAC_1565		chr1	111991193	111992486	HT_ATAC_1565
		chr1	188640035	188640780	RT4_ATAC_1566		chr9	73033718	73035984	SW_ATAC_1566		chr1	99635988	99636398	SC_ATAC_1566		chr1	112161877	112163421	HT_ATAC_1566
		chr1	188675881	188676310	RT4_ATAC_1567		chr1	159869653	159871096	SW_ATAC_1567		chr1	99645920	99646117	SC_ATAC_1567		chr1	112281054	112282652	HT_ATAC_1567
		chr1	189320504	189320615	RT4_ATAC_1568		chr11	125438897	125440409	SW_ATAC_1568		chr1	99729591	99730667	SC_ATAC_1568		chr1	112282835	112283098	HT_ATAC_1568
		chr1	192458893	192459227	RT4_ATAC_1569		chr12	120105239	120106401	SW_ATAC_1569		chr1	99922786	99923408	SC_ATAC_1569		chr1	112297713	112298994	HT_ATAC_1569
		chr1	192465493	192465848	RT4_ATAC_1570		chr2	178482811	178483989	SW_ATAC_1570		chr1	100009968	100010321	SC_ATAC_1570		chr1	112794280	112794634	HT_ATAC_1570
		chr1	192499986	192500485	RT4_ATAC_1571		chr14	50359055	50360830	SW_ATAC_1571		chr1	100045510	100046642	SC_ATAC_1571		chr1	112912338	112912834	HT_ATAC_1571
		chr1	192520003	192520663	RT4_ATAC_1572		chr5	271002	272752	SW_ATAC_1572		chr1	100086752	100087751	SC_ATAC_1572		chr1	112933525	112933740	HT_ATAC_1572
		chr1	192565851	192566854	RT4_ATAC_1573		chr1	51433726	51436142	SW_ATAC_1573		chr1	100110840	100112207	SC_ATAC_1573		chr1	112936764	112937089	HT_ATAC_1573
		chr1	192595405	192596331	RT4_ATAC_1574		chr5	39100513	39101631	SW_ATAC_1574		chr1	100125135	100125857	SC_ATAC_1574		chr1	112938256	112939073	HT_ATAC_1574
		chr1	192677197	192677577	RT4_ATAC_1575		chr2	201753048	201754899	SW_ATAC_1575		chr1	100147794	100148354	SC_ATAC_1575		chr1	113006950	113007591	HT_ATAC_1575
		chr1	192708615	192708982	RT4_ATAC_1576		chr2	207023647	207025353	SW_ATAC_1576		chr1	100173190	100173365	SC_ATAC_1576		chr1	113007852	113007982	HT_ATAC_1576
		chr1	192709064	192709225	RT4_ATAC_1577		chr7	32981478	32983004	SW_ATAC_1577		chr1	100222165	100222560	SC_ATAC_1577		chr1	113161302	113161986	HT_ATAC_1577
		chr1	192777443	192778670	RT4_ATAC_1578		chr2	127864341	127865527	SW_ATAC_1578		chr1	100231925	100232026	SC_ATAC_1578		chr1	113162183	113163107	HT_ATAC_1578
		chr1	192803268	192803608	RT4_ATAC_1579		chr8	27219119	27219985	SW_ATAC_1579		chr1	100232122	100232350	SC_ATAC_1579		chr1	113179705	113180944	HT_ATAC_1579
		chr1	192830984	192831667	RT4_ATAC_1580		chr9	26946311	26947670	SW_ATAC_1580		chr1	100274310	100274935	SC_ATAC_1580		chr1	113216352	113218053	HT_ATAC_1580
		chr1	192846271	192847298	RT4_ATAC_1581		chr1	211688501	211689187	SW_ATAC_1581		chr1	100280031	100280431	SC_ATAC_1581		chr1	113229588	113230516	HT_ATAC_1581
		chr1	192908433	192908998	RT4_ATAC_1582		chr15	22832933	22834275	SW_ATAC_1582		chr1	100315353	100316253	SC_ATAC_1582		chr1	113243376	113243709	HT_ATAC_1582
		chr1	193027657	193029307	RT4_ATAC_1583		chr3	148708963	148710293	SW_ATAC_1583		chr1	100434855	100436279	SC_ATAC_1583		chr1	113247517	113248201	HT_ATAC_1583
		chr1	193073672	193074900	RT4_ATAC_1584		chr2	8818224	8819530	SW_ATAC_1584		chr1	100503480	100504787	SC_ATAC_1584		chr1	113249685	113250172	HT_ATAC_1584
		chr1	193090634	193091618	RT4_ATAC_1585		chr1	117663914	117665276	SW_ATAC_1585		chr1	100517153	100517761	SC_ATAC_1585		chr1	113257306	113258612	HT_ATAC_1585
		chr1	193154934	193155588	RT4_ATAC_1586		chr11	110300466	110301836	SW_ATAC_1586		chr1	100598040	100599163	SC_ATAC_1586		chr1	113258777	113259165	HT_ATAC_1586
		chr1	193378097	193378449	RT4_ATAC_1587		chr11	57434322	57436234	SW_ATAC_1587		chr1	100715047	100715826	SC_ATAC_1587		chr1	113305174	113306043	HT_ATAC_1587
		chr1	193387453	193387994	RT4_ATAC_1588		chr14	71221530	71222767	SW_ATAC_1588		chr1	100731153	100731503	SC_ATAC_1588		chr1	113351921	113352308	HT_ATAC_1588
		chr1	193455834	193456420	RT4_ATAC_1589		chr8	1771341	1772735	SW_ATAC_1589		chr1	100731587	100732374	SC_ATAC_1589		chr1	113391997	113393372	HT_ATAC_1589
		chr1	195066511	195066967	RT4_ATAC_1590		chr7	134670897	134672039	SW_ATAC_1590		chr1	100791106	100791465	SC_ATAC_1590		chr1	113409617	113409965	HT_ATAC_1590
		chr1	195561063	195561867	RT4_ATAC_1591		chr5	84943173	84944175	SW_ATAC_1591		chr1	100816821	100817408	SC_ATAC_1591		chr1	113416520	113417052	HT_ATAC_1591
		chr1	195606519	195607218	RT4_ATAC_1592		chr7	25901745	25902553	SW_ATAC_1592		chr1	100817709	100818556	SC_ATAC_1592		chr1	113446757	113447180	HT_ATAC_1592
		chr1	195971370	195971767	RT4_ATAC_1593		chr7	112758106	112759226	SW_ATAC_1593		chr1	100820603	100820749	SC_ATAC_1593		chr1	113447518	113447850	HT_ATAC_1593
		chr1	195972076	195972502	RT4_ATAC_1594		chr16	75550416	75551582	SW_ATAC_1594		chr1	100925167	100925362	SC_ATAC_1594		chr1	113497930	113499762	HT_ATAC_1594
		chr1	196149979	196150895	RT4_ATAC_1595		chr13	114539918	114541375	SW_ATAC_1595		chr1	101071894	101072287	SC_ATAC_1595		chr1	113615273	113616378	HT_ATAC_1595
		chr1	196330185	196330870	RT4_ATAC_1596		chr14	24911149	24912290	SW_ATAC_1596		chr1	101087608	101088008	SC_ATAC_1596		chr1	113734221	113734851	HT_ATAC_1596
		chr1	196369826	196370321	RT4_ATAC_1597		chr18	61549674	61550507	SW_ATAC_1597		chr1	101301107	101302054	SC_ATAC_1597		chr1	113932471	113933965	HT_ATAC_1597
		chr1	196527674	196527848	RT4_ATAC_1598		chr5	40797476	40799255	SW_ATAC_1598		chr1	101312929	101313659	SC_ATAC_1598		chr1	114301351	114302644	HT_ATAC_1598
		chr1	196647681	196648148	RT4_ATAC_1599		chr7	107146425	107147666	SW_ATAC_1599		chr1	101332102	101332232	SC_ATAC_1599		chr1	114353881	114355321	HT_ATAC_1599
		chr1	196692537	196692761	RT4_ATAC_1600		chr7	105161788	105163289	SW_ATAC_1600		chr1	101349269	101350012	SC_ATAC_1600		chr1	114447009	114448467	HT_ATAC_1600
		chr1	196712502	196712655	RT4_ATAC_1601		chr10	58120517	58122041	SW_ATAC_1601		chr1	101360170	101360816	SC_ATAC_1601		chr1	114471696	114473668	HT_ATAC_1601
		chr1	197099934	197100767	RT4_ATAC_1602		chrX	18904212	18906076	SW_ATAC_1602		chr1	101360932	101361060	SC_ATAC_1602		chr1	114625406	114626403	HT_ATAC_1602
		chr1	197115207	197115643	RT4_ATAC_1603		chr2	192542094	192543957	SW_ATAC_1603		chr1	101361189	101361764	SC_ATAC_1603		chr1	114632103	114633014	HT_ATAC_1603
		chr1	197115743	197116019	RT4_ATAC_1604		chr2	204443400	204444713	SW_ATAC_1604		chr1	101362086	101362487	SC_ATAC_1604		chr1	114655320	114655831	HT_ATAC_1604
		chr1	197116102	197116300	RT4_ATAC_1605		chr17	45726471	45728194	SW_ATAC_1605		chr1	101491073	101491177	SC_ATAC_1605		chr1	114656545	114657557	HT_ATAC_1605
		chr1	197143372	197143729	RT4_ATAC_1606		chr8	117484506	117486095	SW_ATAC_1606		chr1	101491284	101492072	SC_ATAC_1606		chr1	114888925	114889491	HT_ATAC_1606
		chr1	197169836	197170943	RT4_ATAC_1607		chr5	51106403	51106928	SW_ATAC_1607		chr1	101541420	101541779	SC_ATAC_1607		chr1	115052837	115054253	HT_ATAC_1607
		chr1	197326189	197326321	RT4_ATAC_1608		chr16	72698239	72699349	SW_ATAC_1608		chr1	101596065	101596585	SC_ATAC_1608		chr1	115123766	115124846	HT_ATAC_1608
		chr1	197589832	197590297	RT4_ATAC_1609		chr5	65017181	65019214	SW_ATAC_1609		chr1	101616301	101616847	SC_ATAC_1609		chr1	115153221	115154008	HT_ATAC_1609
		chr1	197632499	197633200	RT4_ATAC_1610		chr7	104653964	104654285	SW_ATAC_1610		chr1	101640112	101641285	SC_ATAC_1610		chr1	115154156	115154235	HT_ATAC_1610
		chr1	197743897	197745491	RT4_ATAC_1611		chr2	167041092	167042148	SW_ATAC_1611		chr1	101666053	101666506	SC_ATAC_1611		chr1	115212234	115213407	HT_ATAC_1611
		chr1	197752602	197753137	RT4_ATAC_1612		chrX	13670389	13671863	SW_ATAC_1612		chr1	101701033	101702249	SC_ATAC_1612		chr1	115258972	115259749	HT_ATAC_1612
		chr1	197838149	197838316	RT4_ATAC_1613		chr2	158484635	158485923	SW_ATAC_1613		chr1	101704328	101704571	SC_ATAC_1613		chr1	115299604	115300318	HT_ATAC_1613
		chr1	197871274	197872406	RT4_ATAC_1614		chr8	33370026	33372124	SW_ATAC_1614		chr1	101723467	101724011	SC_ATAC_1614		chr1	115300525	115300892	HT_ATAC_1614
		chr1	197885033	197885324	RT4_ATAC_1615		chr3	67704041	67705537	SW_ATAC_1615		chr1	101754078	101754459	SC_ATAC_1615		chr1	115322795	115323619	HT_ATAC_1615
		chr1	197963890	197964879	RT4_ATAC_1616		chr10	1094497	1095863	SW_ATAC_1616		chr1	101823044	101823227	SC_ATAC_1616		chr1	115594662	115595392	HT_ATAC_1616
		chr1	198057619	198057900	RT4_ATAC_1617		chr4	11429853	11431598	SW_ATAC_1617		chr1	101985916	101986084	SC_ATAC_1617		chr1	115605045	115605664	HT_ATAC_1617
		chr1	198125383	198125512	RT4_ATAC_1618		chr13	76278824	76280149	SW_ATAC_1618		chr1	102119027	102119769	SC_ATAC_1618		chr1	115631803	115632186	HT_ATAC_1618
		chr1	198125860	198126581	RT4_ATAC_1619		chr3	24000328	24001373	SW_ATAC_1619		chr1	102657393	102657575	SC_ATAC_1619		chr1	115677721	115678137	HT_ATAC_1619
		chr1	198126668	198126895	RT4_ATAC_1620		chr8	27167862	27169292	SW_ATAC_1620		chr1	103093640	103094345	SC_ATAC_1620		chr1	115678368	115678610	HT_ATAC_1620
		chr1	198128181	198128417	RT4_ATAC_1621		chr4	128981454	128983678	SW_ATAC_1621		chr1	103341363	103341699	SC_ATAC_1621		chr1	115678789	115678934	HT_ATAC_1621
		chr1	198412435	198412840	RT4_ATAC_1622		chr16	75681126	75682883	SW_ATAC_1622		chr1	103345011	103345634	SC_ATAC_1622		chr1	115732545	115733121	HT_ATAC_1622
		chr1	198418508	198419106	RT4_ATAC_1623		chr2	86946902	86947993	SW_ATAC_1623		chr1	103399522	103400125	SC_ATAC_1623		chr1	115752761	115753813	HT_ATAC_1623
		chr1	198625635	198626246	RT4_ATAC_1624		chr2	109064905	109066435	SW_ATAC_1624		chr1	103406705	103407493	SC_ATAC_1624		chr1	115842874	115843580	HT_ATAC_1624
		chr1	198626680	198627400	RT4_ATAC_1625		chr20	5106742	5108512	SW_ATAC_1625		chr1	103571979	103572136	SC_ATAC_1625		chr1	115873209	115873538	HT_ATAC_1625
		chr1	198638072	198638579	RT4_ATAC_1626		chr12	21809846	21811265	SW_ATAC_1626		chr1	103572247	103572936	SC_ATAC_1626		chr1	115879982	115880917	HT_ATAC_1626
		chr1	198650970	198651506	RT4_ATAC_1627		chr6	19537898	19539055	SW_ATAC_1627		chr1	104003962	104004086	SC_ATAC_1627		chr1	115973273	115973890	HT_ATAC_1627
		chr1	198806485	198807019	RT4_ATAC_1628		chr1	222060027	222061146	SW_ATAC_1628		chr1	104032458	104032982	SC_ATAC_1628		chr1	116039594	116040233	HT_ATAC_1628
		chr1	198859858	198860047	RT4_ATAC_1629		chr2	198479144	198480469	SW_ATAC_1629		chr1	104067678	104068148	SC_ATAC_1629		chr1	116088258	116089223	HT_ATAC_1629
		chr1	199082492	199082663	RT4_ATAC_1630		chr12	83079535	83079872	SW_ATAC_1630		chr1	104068258	104069133	SC_ATAC_1630		chr1	116184266	116185668	HT_ATAC_1630
		chr1	199171559	199171667	RT4_ATAC_1631		chr9	127154547	127155642	SW_ATAC_1631		chr1	104193640	104193859	SC_ATAC_1631		chr1	116257127	116257794	HT_ATAC_1631
		chr1	199241495	199242209	RT4_ATAC_1632		chr2	74425404	74426545	SW_ATAC_1632		chr1	104674930	104675260	SC_ATAC_1632		chr1	116314270	116314911	HT_ATAC_1632
		chr1	199753367	199753649	RT4_ATAC_1633		chr11	47945349	47946473	SW_ATAC_1633		chr1	105207400	105208529	SC_ATAC_1633		chr1	116681536	116682106	HT_ATAC_1633
		chr1	199998219	199998671	RT4_ATAC_1634		chr6	53516010	53517298	SW_ATAC_1634		chr1	105630070	105630838	SC_ATAC_1634		chr1	116915316	116917024	HT_ATAC_1634
		chr1	200008389	200009019	RT4_ATAC_1635		chr14	31732647	31733220	SW_ATAC_1635		chr1	105680160	105680719	SC_ATAC_1635		chr1	116960704	116961540	HT_ATAC_1635
		chr1	200100091	200100384	RT4_ATAC_1636		chr20	35960027	35961143	SW_ATAC_1636		chr1	106206896	106207586	SC_ATAC_1636		chr1	116995959	116997363	HT_ATAC_1636
		chr1	200100729	200101163	RT4_ATAC_1637		chr3	40350467	40351968	SW_ATAC_1637		chr1	106408261	106408613	SC_ATAC_1637		chr1	117027794	117028142	HT_ATAC_1637
		chr1	200153264	200153626	RT4_ATAC_1638		chr13	98627662	98629273	SW_ATAC_1638		chr1	106809512	106809654	SC_ATAC_1638		chr1	117051405	117052436	HT_ATAC_1638
		chr1	200234108	200234446	RT4_ATAC_1639		chr5	18745119	18746722	SW_ATAC_1639		chr1	106810685	106810983	SC_ATAC_1639		chr1	117099054	117099704	HT_ATAC_1639
		chr1	200271206	200271849	RT4_ATAC_1640		chr15	49912410	49914200	SW_ATAC_1640		chr1	106982029	106982737	SC_ATAC_1640		chr1	117112496	117113850	HT_ATAC_1640
		chr1	200378686	200379008	RT4_ATAC_1641		chr6	153304038	153305548	SW_ATAC_1641		chr1	107163101	107164212	SC_ATAC_1641		chr1	117185864	117186385	HT_ATAC_1641
		chr1	200379096	200379546	RT4_ATAC_1642		chr2	55458775	55460683	SW_ATAC_1642		chr1	107466897	107467625	SC_ATAC_1642		chr1	117209583	117210730	HT_ATAC_1642
		chr1	200379648	200380066	RT4_ATAC_1643		chr8	107071749	107073110	SW_ATAC_1643		chr1	107540912	107541505	SC_ATAC_1643		chr1	117217411	117217725	HT_ATAC_1643
		chr1	200384947	200385311	RT4_ATAC_1644		chr10	115933362	115934884	SW_ATAC_1644		chr1	107559039	107559563	SC_ATAC_1644		chr1	117229791	117230115	HT_ATAC_1644
		chr1	200446615	200447422	RT4_ATAC_1645		chr3	143320325	143321339	SW_ATAC_1645		chr1	107599015	107600423	SC_ATAC_1645		chr1	117239035	117239725	HT_ATAC_1645
		chr1	200452616	200452918	RT4_ATAC_1646		chr4	123843103	123844688	SW_ATAC_1646		chr1	107619459	107619895	SC_ATAC_1646		chr1	117421461	117422324	HT_ATAC_1646
		chr1	200589707	200590268	RT4_ATAC_1647		chr16	14013196	14014523	SW_ATAC_1647		chr1	107682444	107682864	SC_ATAC_1647		chr1	117444693	117445516	HT_ATAC_1647
		chr1	200638457	200639517	RT4_ATAC_1648		chr13	24152840	24154459	SW_ATAC_1648		chr1	107684205	107684480	SC_ATAC_1648		chr1	117452423	117453730	HT_ATAC_1648
		chr1	200707755	200708846	RT4_ATAC_1649		chr4	187840231	187841264	SW_ATAC_1649		chr1	107684598	107684735	SC_ATAC_1649		chr1	117461363	117461959	HT_ATAC_1649
		chr1	200860117	200860473	RT4_ATAC_1650		chr5	67510747	67512609	SW_ATAC_1650		chr1	107684823	107685001	SC_ATAC_1650		chr1	117602044	117603571	HT_ATAC_1650
		chr1	200863883	200864105	RT4_ATAC_1651		chr13	79979656	79980982	SW_ATAC_1651		chr1	107695598	107695945	SC_ATAC_1651		chr1	117663952	117665257	HT_ATAC_1651
		chr1	201082958	201083810	RT4_ATAC_1652		chr5	54829994	54831299	SW_ATAC_1652		chr1	107819678	107820033	SC_ATAC_1652		chr1	117753444	117754112	HT_ATAC_1652
		chr1	201123116	201123454	RT4_ATAC_1653		chr12	27974965	27975687	SW_ATAC_1653		chr1	107880305	107881439	SC_ATAC_1653		chr1	117811096	117812119	HT_ATAC_1653
		chr1	201123538	201123776	RT4_ATAC_1654		chr20	55043052	55044382	SW_ATAC_1654		chr1	107973395	107973559	SC_ATAC_1654		chr1	117909090	117910486	HT_ATAC_1654
		chr1	201139603	201140482	RT4_ATAC_1655		chr7	54925379	54926354	SW_ATAC_1655		chr1	108072287	108072451	SC_ATAC_1655		chr1	118148175	118149276	HT_ATAC_1655
		chr1	201154102	201154352	RT4_ATAC_1656		chr6	167040151	167041730	SW_ATAC_1656		chr1	108078521	108079602	SC_ATAC_1656		chr1	118277723	118278084	HT_ATAC_1656
		chr1	201244257	201244831	RT4_ATAC_1657		chr4	89744144	89745074	SW_ATAC_1657		chr1	108090438	108090674	SC_ATAC_1657		chr1	118368993	118369720	HT_ATAC_1657
		chr1	201265129	201265316	RT4_ATAC_1658		chr2	179279372	179279688	SW_ATAC_1658		chr1	108099814	108100181	SC_ATAC_1658		chr1	118471510	118472909	HT_ATAC_1658
		chr1	201366234	201366499	RT4_ATAC_1659		chr6	105850029	105851622	SW_ATAC_1659		chr1	108114982	108115972	SC_ATAC_1659		chr1	119202086	119202604	HT_ATAC_1659
		chr1	201368647	201369013	RT4_ATAC_1660		chr20	30192818	30193424	SW_ATAC_1660		chr1	108135893	108136984	SC_ATAC_1660		chr1	119682605	119683505	HT_ATAC_1660
		chr1	201430243	201430617	RT4_ATAC_1661		chr2	30369133	30370293	SW_ATAC_1661		chr1	108190326	108190986	SC_ATAC_1661		chr1	119683672	119683950	HT_ATAC_1661
		chr1	201430813	201431530	RT4_ATAC_1662		chr11	124823685	124824749	SW_ATAC_1662		chr1	108211185	108211362	SC_ATAC_1662		chr1	119916851	119917249	HT_ATAC_1662
		chr1	201437991	201438886	RT4_ATAC_1663		chr1	179050669	179052378	SW_ATAC_1663		chr1	108211471	108212025	SC_ATAC_1663		chr1	120173897	120174414	HT_ATAC_1663
		chr1	201445071	201446079	RT4_ATAC_1664		chr2	201827635	201828925	SW_ATAC_1664		chr1	108220375	108220830	SC_ATAC_1664		chr1	120189839	120191426	HT_ATAC_1664
		chr1	201451287	201451469	RT4_ATAC_1665		chr5	77071225	77072753	SW_ATAC_1665		chr1	108225027	108226140	SC_ATAC_1665		chr1	120216371	120217265	HT_ATAC_1665
		chr1	201475976	201476424	RT4_ATAC_1666		chr5	130598613	130600742	SW_ATAC_1666		chr1	108230660	108230772	SC_ATAC_1666		chr1	120217482	120217671	HT_ATAC_1666
		chr1	201507716	201508442	RT4_ATAC_1667		chr1	215287012	215288347	SW_ATAC_1667		chr1	108231052	108231478	SC_ATAC_1667		chr1	120254373	120254748	HT_ATAC_1667
		chr1	201683910	201684068	RT4_ATAC_1668		chr2	37457784	37459598	SW_ATAC_1668		chr1	108231780	108232123	SC_ATAC_1668		chr1	120254997	120255544	HT_ATAC_1668
		chr1	201708612	201709353	RT4_ATAC_1669		chr12	73777165	73778195	SW_ATAC_1669		chr1	108234228	108234486	SC_ATAC_1669		chr1	120491148	120491694	HT_ATAC_1669
		chr1	201798095	201798577	RT4_ATAC_1670		chr7	37071238	37072288	SW_ATAC_1670		chr1	108291286	108291480	SC_ATAC_1670		chr1	120543894	120544106	HT_ATAC_1670
		chr1	201924351	201924718	RT4_ATAC_1671		chr12	102454933	102456240	SW_ATAC_1671		chr1	108292797	108293270	SC_ATAC_1671		chr1	120587490	120587877	HT_ATAC_1671
		chr1	201951278	201952539	RT4_ATAC_1672		chr16	75598961	75601025	SW_ATAC_1672		chr1	108363535	108363679	SC_ATAC_1672		chr1	120601821	120602357	HT_ATAC_1672
		chr1	201979340	201980116	RT4_ATAC_1673		chr3	85007535	85008858	SW_ATAC_1673		chr1	108384744	108385272	SC_ATAC_1673		chr1	120604042	120604811	HT_ATAC_1673
		chr1	201987091	201988529	RT4_ATAC_1674		chr14	20937030	20938922	SW_ATAC_1674		chr1	108410075	108410781	SC_ATAC_1674		chr1	120611102	120612835	HT_ATAC_1674
		chr1	202003578	202004531	RT4_ATAC_1675		chr5	106878002	106878976	SW_ATAC_1675		chr1	108463748	108464258	SC_ATAC_1675		chr1	120633473	120633751	HT_ATAC_1675
		chr1	202015318	202015715	RT4_ATAC_1676		chr10	43186846	43187784	SW_ATAC_1676		chr1	108479098	108480060	SC_ATAC_1676		chr1	120796139	120796972	HT_ATAC_1676
		chr1	202025763	202026640	RT4_ATAC_1677		chr4	154169692	154171308	SW_ATAC_1677		chr1	108510255	108510752	SC_ATAC_1677		chr1	120837162	120839066	HT_ATAC_1677
		chr1	202027363	202027807	RT4_ATAC_1678		chr4	68995402	68996128	SW_ATAC_1678		chr1	108552150	108553184	SC_ATAC_1678		chr1	120925281	120926121	HT_ATAC_1678
		chr1	202191551	202191892	RT4_ATAC_1679		chr5	149339740	149340859	SW_ATAC_1679		chr1	108558888	108559914	SC_ATAC_1679		chr1	121260796	121261678	HT_ATAC_1679
		chr1	202310602	202311330	RT4_ATAC_1680		chr4	140374220	140375752	SW_ATAC_1680		chr1	108588078	108589150	SC_ATAC_1680		chr1	143245679	143245938	HT_ATAC_1680
		chr1	202317558	202317947	RT4_ATAC_1681		chr3	17783408	17784735	SW_ATAC_1681		chr1	108650269	108650668	SC_ATAC_1681		chr1	143344764	143345222	HT_ATAC_1681
		chr1	202349005	202349803	RT4_ATAC_1682		chr14	53161477	53162849	SW_ATAC_1682		chr1	108668257	108668435	SC_ATAC_1682		chr1	143912699	143912916	HT_ATAC_1682
		chr1	202380098	202380334	RT4_ATAC_1683		chr8	38033403	38035032	SW_ATAC_1683		chr1	108669106	108669654	SC_ATAC_1683		chr1	143913092	143914554	HT_ATAC_1683
		chr1	202547129	202547681	RT4_ATAC_1684		chr1	162039244	162040477	SW_ATAC_1684		chr1	108684234	108684524	SC_ATAC_1684		chr1	143930170	143931139	HT_ATAC_1684
		chr1	202688829	202689013	RT4_ATAC_1685		chr3	32147664	32149139	SW_ATAC_1685		chr1	108685519	108686406	SC_ATAC_1685		chr1	143936753	143937503	HT_ATAC_1685
		chr1	202779682	202780340	RT4_ATAC_1686		chr7	112429155	112430927	SW_ATAC_1686		chr1	108710247	108711036	SC_ATAC_1686		chr1	143955026	143955598	HT_ATAC_1686
		chr1	202805526	202806309	RT4_ATAC_1687		chr9	117669819	117670959	SW_ATAC_1687		chr1	108724909	108725459	SC_ATAC_1687		chr1	143992393	143993061	HT_ATAC_1687
		chr1	202829917	202830944	RT4_ATAC_1688		chr17	8533912	8534935	SW_ATAC_1688		chr1	108741823	108743350	SC_ATAC_1688		chr1	144010685	144010957	HT_ATAC_1688
		chr1	202857532	202858485	RT4_ATAC_1689		chr13	74002898	74004255	SW_ATAC_1689		chr1	108743458	108743701	SC_ATAC_1689		chr1	144030777	144031177	HT_ATAC_1689
		chr1	202895933	202896535	RT4_ATAC_1690		chr13	100632384	100634935	SW_ATAC_1690		chr1	108758946	108760095	SC_ATAC_1690		chr1	144047597	144048023	HT_ATAC_1690
		chr1	202927342	202928051	RT4_ATAC_1691		chrX	110924183	110925541	SW_ATAC_1691		chr1	108899880	108900760	SC_ATAC_1691		chr1	144072334	144072919	HT_ATAC_1691
		chr1	202936153	202936805	RT4_ATAC_1692		chr21	38639172	38640598	SW_ATAC_1692		chr1	108914398	108914888	SC_ATAC_1692		chr1	144094807	144095540	HT_ATAC_1692
		chr1	202976117	202977013	RT4_ATAC_1693		chr7	76114873	76116314	SW_ATAC_1693		chr1	109055019	109055104	SC_ATAC_1693		chr1	144533623	144534985	HT_ATAC_1693
		chr1	203242276	203242848	RT4_ATAC_1694		chr2	167095516	167096537	SW_ATAC_1694		chr1	109055213	109055371	SC_ATAC_1694		chr1	144535260	144535505	HT_ATAC_1694
		chr1	203259556	203260012	RT4_ATAC_1695		chr20	50383418	50384968	SW_ATAC_1695		chr1	109076067	109076363	SC_ATAC_1695		chr1	144593533	144594183	HT_ATAC_1695
		chr1	203274276	203275188	RT4_ATAC_1696		chr2	10548093	10548995	SW_ATAC_1696		chr1	109102382	109102758	SC_ATAC_1696		chr1	144884908	144886063	HT_ATAC_1696
		chr1	203285740	203286226	RT4_ATAC_1697		chr3	197462890	197464476	SW_ATAC_1697		chr1	109104433	109104628	SC_ATAC_1697		chr1	144908698	144909110	HT_ATAC_1697
		chr1	203296256	203297277	RT4_ATAC_1698		chr2	14774351	14775954	SW_ATAC_1698		chr1	109112837	109113222	SC_ATAC_1698		chr1	144931632	144933162	HT_ATAC_1698
		chr1	203481787	203482363	RT4_ATAC_1699		chr12	25402860	25404563	SW_ATAC_1699		chr1	109186278	109186436	SC_ATAC_1699		chr1	144941253	144941766	HT_ATAC_1699
		chr1	203507129	203507551	RT4_ATAC_1700		chr6	88298894	88300200	SW_ATAC_1700		chr1	109203252	109204367	SC_ATAC_1700		chr1	145009570	145009896	HT_ATAC_1700
		chr1	203595619	203595975	RT4_ATAC_1701		chr15	89630959	89631847	SW_ATAC_1701		chr1	109234567	109236262	SC_ATAC_1701		chr1	145039391	145040359	HT_ATAC_1701
		chr1	203720203	203720614	RT4_ATAC_1702		chr2	179058416	179060198	SW_ATAC_1702		chr1	109247218	109247598	SC_ATAC_1702		chr1	145058692	145058869	HT_ATAC_1702
		chr1	203764475	203765296	RT4_ATAC_1703		chr11	89113319	89115005	SW_ATAC_1703		chr1	109262410	109262818	SC_ATAC_1703		chr1	145059044	145059394	HT_ATAC_1703
		chr1	203830483	203831320	RT4_ATAC_1704		chr5	159491452	159492831	SW_ATAC_1704		chr1	109262903	109263212	SC_ATAC_1704		chr1	145075204	145076071	HT_ATAC_1704
		chr1	204042112	204042661	RT4_ATAC_1705		chr14	74416429	74417490	SW_ATAC_1705		chr1	109288921	109290197	SC_ATAC_1705		chr1	145092317	145092980	HT_ATAC_1705
		chr1	204049534	204049861	RT4_ATAC_1706		chr19	55677410	55678668	SW_ATAC_1706		chr1	109359035	109360027	SC_ATAC_1706		chr1	145096265	145096687	HT_ATAC_1706
		chr1	204073293	204074088	RT4_ATAC_1707		chr10	101190043	101191307	SW_ATAC_1707		chr1	109370826	109371483	SC_ATAC_1707		chr1	145138946	145140082	HT_ATAC_1707
		chr1	204182799	204183622	RT4_ATAC_1708		chr12	26277764	26279722	SW_ATAC_1708		chr1	109372898	109373803	SC_ATAC_1708		chr1	145208501	145210330	HT_ATAC_1708
		chr1	204194908	204195336	RT4_ATAC_1709		chr3	148846766	148848584	SW_ATAC_1709		chr1	109419262	109420324	SC_ATAC_1709		chr1	145216434	145217211	HT_ATAC_1709
		chr1	204195487	204195822	RT4_ATAC_1710		chr3	97732242	97733453	SW_ATAC_1710		chr1	109505348	109505515	SC_ATAC_1710		chr1	145219036	145219615	HT_ATAC_1710
		chr1	204255863	204256547	RT4_ATAC_1711		chr15	34659256	34660353	SW_ATAC_1711		chr1	109505641	109506234	SC_ATAC_1711		chr1	145382306	145383624	HT_ATAC_1711
		chr1	204288613	204289039	RT4_ATAC_1712		chr4	151935672	151937779	SW_ATAC_1712		chr1	109506360	109506452	SC_ATAC_1712		chr1	145395470	145395922	HT_ATAC_1712
		chr1	204332648	204333032	RT4_ATAC_1713		chr10	75172816	75174186	SW_ATAC_1713		chr1	109583854	109585159	SC_ATAC_1713		chr1	145396619	145398216	HT_ATAC_1713
		chr1	204367530	204367979	RT4_ATAC_1714		chr11	75525473	75527062	SW_ATAC_1714		chr1	109592493	109593803	SC_ATAC_1714		chr1	145437675	145438558	HT_ATAC_1714
		chr1	204380691	204381402	RT4_ATAC_1715		chr14	81687062	81688295	SW_ATAC_1715		chr1	109618172	109618939	SC_ATAC_1715		chr1	145438864	145439049	HT_ATAC_1715
		chr1	204386294	204386471	RT4_ATAC_1716		chr16	48277201	48278999	SW_ATAC_1716		chr1	109632863	109633897	SC_ATAC_1716		chr1	145454885	145456262	HT_ATAC_1716
		chr1	204386577	204387034	RT4_ATAC_1717		chr7	48074810	48076048	SW_ATAC_1717		chr1	109633990	109634098	SC_ATAC_1717		chr1	145470137	145470747	HT_ATAC_1717
		chr1	204412426	204412721	RT4_ATAC_1718		chr7	20369030	20371452	SW_ATAC_1718		chr1	109642395	109643399	SC_ATAC_1718		chr1	145470912	145471326	HT_ATAC_1718
		chr1	204462661	204463344	RT4_ATAC_1719		chr20	10414267	10415416	SW_ATAC_1719		chr1	109654765	109654938	SC_ATAC_1719		chr1	145471515	145471845	HT_ATAC_1719
		chr1	204463530	204464062	RT4_ATAC_1720		chr3	176506842	176507487	SW_ATAC_1720		chr1	109655207	109655569	SC_ATAC_1720		chr1	145476837	145477589	HT_ATAC_1720
		chr1	204485104	204486001	RT4_ATAC_1721		chr1	231663780	231664939	SW_ATAC_1721		chr1	109656385	109656906	SC_ATAC_1721		chr1	145507208	145508450	HT_ATAC_1721
		chr1	204776413	204776656	RT4_ATAC_1722		chr2	47260909	47262233	SW_ATAC_1722		chr1	109693706	109694016	SC_ATAC_1722		chr1	145515231	145516862	HT_ATAC_1722
		chr1	205090733	205091578	RT4_ATAC_1723		chr2	19738139	19738764	SW_ATAC_1723		chr1	109704489	109705781	SC_ATAC_1723		chr1	145542403	145543377	HT_ATAC_1723
		chr1	205180092	205180982	RT4_ATAC_1724		chr13	48574532	48576304	SW_ATAC_1724		chr1	109731525	109731874	SC_ATAC_1724		chr1	145548530	145549431	HT_ATAC_1724
		chr1	205253890	205254334	RT4_ATAC_1725		chr2	61697567	61699005	SW_ATAC_1725		chr1	109739841	109741294	SC_ATAC_1725		chr1	145555988	145556364	HT_ATAC_1725
		chr1	205290387	205291100	RT4_ATAC_1726		chr1	169763566	169765121	SW_ATAC_1726		chr1	109756183	109757288	SC_ATAC_1726		chr1	145556653	145557130	HT_ATAC_1726
		chr1	205473463	205474150	RT4_ATAC_1727		chrX	15160171	15161731	SW_ATAC_1727		chr1	109757492	109757709	SC_ATAC_1727		chr1	145574898	145576340	HT_ATAC_1727
		chr1	205512405	205513387	RT4_ATAC_1728		chr13	20207325	20208734	SW_ATAC_1728		chr1	109768767	109769122	SC_ATAC_1728		chr1	145576557	145576718	HT_ATAC_1728
		chr1	205534948	205535396	RT4_ATAC_1729		chr2	118770722	118772319	SW_ATAC_1729		chr1	109782164	109783703	SC_ATAC_1729		chr1	145588460	145589766	HT_ATAC_1729
		chr1	205561036	205561490	RT4_ATAC_1730		chr7	134895662	134896932	SW_ATAC_1730		chr1	109791552	109792247	SC_ATAC_1730		chr1	145610189	145611583	HT_ATAC_1730
		chr1	205579831	205580620	RT4_ATAC_1731		chr2	175112576	175113803	SW_ATAC_1731		chr1	109800043	109800542	SC_ATAC_1731		chr1	145713307	145714582	HT_ATAC_1731
		chr1	205600192	205601520	RT4_ATAC_1732		chr3	150480473	150481937	SW_ATAC_1732		chr1	109805689	109806627	SC_ATAC_1732		chr1	145728002	145728938	HT_ATAC_1732
		chr1	205633503	205634266	RT4_ATAC_1733		chr10	101379921	101381526	SW_ATAC_1733		chr1	109815937	109816129	SC_ATAC_1733		chr1	145826200	145827289	HT_ATAC_1733
		chr1	205718238	205719167	RT4_ATAC_1734		chr3	140949981	140951499	SW_ATAC_1734		chr1	109817036	109817831	SC_ATAC_1734		chr1	145968883	145969965	HT_ATAC_1734
		chr1	205719252	205719596	RT4_ATAC_1735		chr2	61243640	61245758	SW_ATAC_1735		chr1	109817920	109818098	SC_ATAC_1735		chr1	146008728	146009669	HT_ATAC_1735
		chr1	205744164	205744711	RT4_ATAC_1736		chr5	26942278	26943434	SW_ATAC_1736		chr1	109825213	109826478	SC_ATAC_1736		chr1	146011672	146012001	HT_ATAC_1736
		chr1	205781786	205782552	RT4_ATAC_1737		chr14	64804543	64806065	SW_ATAC_1737		chr1	109940168	109941040	SC_ATAC_1737		chr1	146082679	146082855	HT_ATAC_1737
		chr1	206137058	206138523	RT4_ATAC_1738		chr6	99962768	99964060	SW_ATAC_1738		chr1	109942089	109942254	SC_ATAC_1738		chr1	146373441	146373663	HT_ATAC_1738
		chr1	206144067	206144828	RT4_ATAC_1739		chr2	8821889	8822726	SW_ATAC_1739		chr1	109968453	109969562	SC_ATAC_1739		chr1	146555886	146557048	HT_ATAC_1739
		chr1	206310371	206310601	RT4_ATAC_1740		chr1	84543081	84544562	SW_ATAC_1740		chr1	110026323	110026920	SC_ATAC_1740		chr1	146638794	146639284	HT_ATAC_1740
		chr1	206491279	206491721	RT4_ATAC_1741		chr5	115420030	115421261	SW_ATAC_1741		chr1	110036335	110037006	SC_ATAC_1741		chr1	146643577	146645012	HT_ATAC_1741
		chr1	206643532	206644227	RT4_ATAC_1742		chr4	26861846	26863463	SW_ATAC_1742		chr1	110037090	110037167	SC_ATAC_1742		chr1	146696144	146697393	HT_ATAC_1742
		chr1	206680731	206680979	RT4_ATAC_1743		chr3	138047959	138049047	SW_ATAC_1743		chr1	110051753	110052637	SC_ATAC_1743		chr1	146713968	146715274	HT_ATAC_1743
		chr1	206686687	206687442	RT4_ATAC_1744		chr7	143932555	143933976	SW_ATAC_1744		chr1	110074992	110075356	SC_ATAC_1744		chr1	147070851	147072388	HT_ATAC_1744
		chr1	206698216	206698690	RT4_ATAC_1745		chr14	52117892	52119473	SW_ATAC_1745		chr1	110075482	110075732	SC_ATAC_1745		chr1	147112325	147113031	HT_ATAC_1745
		chr1	206730167	206730720	RT4_ATAC_1746		chr7	72298454	72299548	SW_ATAC_1746		chr1	110091040	110092089	SC_ATAC_1746		chr1	147113932	147114058	HT_ATAC_1746
		chr1	206759971	206760103	RT4_ATAC_1747		chrX	7038036	7039776	SW_ATAC_1747		chr1	110113171	110113602	SC_ATAC_1747		chr1	147141608	147143250	HT_ATAC_1747
		chr1	206760233	206760379	RT4_ATAC_1748		chr7	95950442	95951825	SW_ATAC_1748		chr1	110160000	110160411	SC_ATAC_1748		chr1	147171825	147172686	HT_ATAC_1748
		chr1	206763418	206763700	RT4_ATAC_1749		chr2	135440710	135441809	SW_ATAC_1749		chr1	110162149	110162510	SC_ATAC_1749		chr1	147188686	147189496	HT_ATAC_1749
		chr1	206785488	206785636	RT4_ATAC_1750		chr8	48293993	48294483	SW_ATAC_1750		chr1	110162928	110163948	SC_ATAC_1750		chr1	147193809	147194618	HT_ATAC_1750
		chr1	206785723	206786085	RT4_ATAC_1751		chrX	119763333	119764387	SW_ATAC_1751		chr1	110182925	110183126	SC_ATAC_1751		chr1	147229385	147230459	HT_ATAC_1751
		chr1	206808656	206809292	RT4_ATAC_1752		chr1	63249153	63250563	SW_ATAC_1752		chr1	110186021	110186410	SC_ATAC_1752		chr1	147232558	147232917	HT_ATAC_1752
		chr1	207176100	207176591	RT4_ATAC_1753		chr8	91012867	91014739	SW_ATAC_1753		chr1	110282371	110283487	SC_ATAC_1753		chr1	147233065	147233312	HT_ATAC_1753
		chr1	207206051	207206505	RT4_ATAC_1754		chr3	12486049	12487506	SW_ATAC_1754		chr1	110316380	110316566	SC_ATAC_1754		chr1	147362227	147362754	HT_ATAC_1754
		chr1	207226252	207227124	RT4_ATAC_1755		chr3	69788324	69789543	SW_ATAC_1755		chr1	110325748	110326496	SC_ATAC_1755		chr1	147400179	147401225	HT_ATAC_1755
		chr1	207414066	207415193	RT4_ATAC_1756		chr1	100434816	100436277	SW_ATAC_1756		chr1	110336515	110336820	SC_ATAC_1756		chr1	147510613	147511852	HT_ATAC_1756
		chr1	207455474	207455821	RT4_ATAC_1757		chr14	31494408	31496820	SW_ATAC_1757		chr1	110363776	110364327	SC_ATAC_1757		chr1	147552949	147554098	HT_ATAC_1757
		chr1	207489578	207490326	RT4_ATAC_1758		chr20	17537616	17538788	SW_ATAC_1758		chr1	110435034	110436086	SC_ATAC_1758		chr1	147735495	147736467	HT_ATAC_1758
		chr1	207494516	207495364	RT4_ATAC_1759		chr8	142237873	142238966	SW_ATAC_1759		chr1	110444081	110444595	SC_ATAC_1759		chr1	147806449	147807419	HT_ATAC_1759
		chr1	207818274	207818686	RT4_ATAC_1760		chr7	102388927	102390143	SW_ATAC_1760		chr1	110471221	110472237	SC_ATAC_1760		chr1	148193250	148194355	HT_ATAC_1760
		chr1	207924966	207926005	RT4_ATAC_1761		chr4	128553522	128554902	SW_ATAC_1761		chr1	110527156	110527982	SC_ATAC_1761		chr1	148555569	148556483	HT_ATAC_1761
		chr1	207963224	207963723	RT4_ATAC_1762		chr12	15941692	15943197	SW_ATAC_1762		chr1	110546314	110547069	SC_ATAC_1762		chr1	148866991	148867391	HT_ATAC_1762
		chr1	207970756	207971009	RT4_ATAC_1763		chrX	7064973	7066876	SW_ATAC_1763		chr1	110576865	110577324	SC_ATAC_1763		chr1	148928869	148929821	HT_ATAC_1763
		chr1	207996036	207996303	RT4_ATAC_1764		chr11	109963157	109964771	SW_ATAC_1764		chr1	110577427	110578209	SC_ATAC_1764		chr1	148930125	148931792	HT_ATAC_1764
		chr1	207999894	208000363	RT4_ATAC_1765		chr3	155523313	155524538	SW_ATAC_1765		chr1	110656140	110656484	SC_ATAC_1765		chr1	149214822	149215105	HT_ATAC_1765
		chr1	208005203	208005562	RT4_ATAC_1766		chr5	60704411	60705024	SW_ATAC_1766		chr1	110752643	110753946	SC_ATAC_1766		chr1	149215310	149215916	HT_ATAC_1766
		chr1	208015111	208015671	RT4_ATAC_1767		chr2	161979363	161980977	SW_ATAC_1767		chr1	110880824	110882134	SC_ATAC_1767		chr1	149216097	149216184	HT_ATAC_1767
		chr1	208021632	208022053	RT4_ATAC_1768		chr1	3816568	3818136	SW_ATAC_1768		chr1	110950185	110950834	SC_ATAC_1768		chr1	149222879	149223030	HT_ATAC_1768
		chr1	208042409	208042706	RT4_ATAC_1769		chr7	149535177	149536397	SW_ATAC_1769		chr1	110955230	110955606	SC_ATAC_1769		chr1	149223554	149224258	HT_ATAC_1769
		chr1	208058487	208058662	RT4_ATAC_1770		chr16	81526735	81527956	SW_ATAC_1770		chr1	111019661	111020646	SC_ATAC_1770		chr1	149224406	149224665	HT_ATAC_1770
		chr1	208111530	208111761	RT4_ATAC_1771		chr1	227126756	227128472	SW_ATAC_1771		chr1	111313667	111314210	SC_ATAC_1771		chr1	149297510	149297966	HT_ATAC_1771
		chr1	208136514	208137388	RT4_ATAC_1772		chr14	35590790	35592270	SW_ATAC_1772		chr1	111506326	111506920	SC_ATAC_1772		chr1	149298340	149298900	HT_ATAC_1772
		chr1	208222283	208222752	RT4_ATAC_1773		chr3	134082564	134084031	SW_ATAC_1773		chr1	111682219	111683507	SC_ATAC_1773		chr1	149379158	149379997	HT_ATAC_1773
		chr1	208259438	208259842	RT4_ATAC_1774		chr2	53994547	53995525	SW_ATAC_1774		chr1	111746287	111747366	SC_ATAC_1774		chr1	149380264	149380362	HT_ATAC_1774
		chr1	208305620	208305833	RT4_ATAC_1775		chr8	38853726	38855109	SW_ATAC_1775		chr1	111765554	111765789	SC_ATAC_1775		chr1	149763926	149764278	HT_ATAC_1775
		chr1	208357452	208358075	RT4_ATAC_1776		chr12	95610460	95612445	SW_ATAC_1776		chr1	111888772	111889347	SC_ATAC_1776		chr1	149764499	149765107	HT_ATAC_1776
		chr1	208380730	208381692	RT4_ATAC_1777		chr14	34419471	34420530	SW_ATAC_1777		chr1	111991152	111992173	SC_ATAC_1777		chr1	149782534	149785377	HT_ATAC_1777
		chr1	208412238	208412409	RT4_ATAC_1778		chr5	112042803	112044182	SW_ATAC_1778		chr1	111992256	111992522	SC_ATAC_1778		chr1	149803401	149804932	HT_ATAC_1778
		chr1	208412505	208412644	RT4_ATAC_1779		chr17	44302249	44303349	SW_ATAC_1779		chr1	112050234	112051128	SC_ATAC_1779		chr1	149812671	149813722	HT_ATAC_1779
		chr1	208416906	208417969	RT4_ATAC_1780		chr16	81962223	81963294	SW_ATAC_1780		chr1	112135129	112136259	SC_ATAC_1780		chr1	149814124	149814763	HT_ATAC_1780
		chr1	208418596	208418773	RT4_ATAC_1781		chr6	90528401	90529739	SW_ATAC_1781		chr1	112162200	112163322	SC_ATAC_1781		chr1	149822186	149822745	HT_ATAC_1781
		chr1	209381097	209381278	RT4_ATAC_1782		chr3	195447369	195448491	SW_ATAC_1782		chr1	112247255	112247783	SC_ATAC_1782		chr1	149823212	149824267	HT_ATAC_1782
		chr1	209422090	209422274	RT4_ATAC_1783		chr5	127270432	127271422	SW_ATAC_1783		chr1	112280882	112282575	SC_ATAC_1783		chr1	149824755	149825204	HT_ATAC_1783
		chr1	209439888	209440532	RT4_ATAC_1784		chr1	193506437	193507584	SW_ATAC_1784		chr1	112297983	112298995	SC_ATAC_1784		chr1	149832000	149833539	HT_ATAC_1784
		chr1	209508558	209508721	RT4_ATAC_1785		chr1	198418268	198419551	SW_ATAC_1785		chr1	112490756	112492061	SC_ATAC_1785		chr1	149856932	149857591	HT_ATAC_1785
		chr1	209556627	209557166	RT4_ATAC_1786		chr3	141594384	141596360	SW_ATAC_1786		chr1	112534086	112534441	SC_ATAC_1786		chr1	149857789	149858853	HT_ATAC_1786
		chr1	209557248	209557762	RT4_ATAC_1787		chr5	61707873	61709267	SW_ATAC_1787		chr1	112912360	112912585	SC_ATAC_1787		chr1	149859014	149860200	HT_ATAC_1787
		chr1	209562639	209562999	RT4_ATAC_1788		chr12	59313708	59314542	SW_ATAC_1788		chr1	112933510	112933745	SC_ATAC_1788		chr1	149870837	149871861	HT_ATAC_1788
		chr1	209571967	209572405	RT4_ATAC_1789		chr5	116790285	116791636	SW_ATAC_1789		chr1	112936764	112937422	SC_ATAC_1789		chr1	149899023	149899899	HT_ATAC_1789
		chr1	209589144	209589900	RT4_ATAC_1790		chr4	57301030	57302728	SW_ATAC_1790		chr1	112938606	112939099	SC_ATAC_1790		chr1	149900052	149900446	HT_ATAC_1790
		chr1	209601976	209602304	RT4_ATAC_1791		chr12	66562890	66564092	SW_ATAC_1791		chr1	113007124	113007499	SC_ATAC_1791		chr1	149908571	149909590	HT_ATAC_1791
		chr1	209609090	209609307	RT4_ATAC_1792		chr12	64237376	64238956	SW_ATAC_1792		chr1	113065189	113065598	SC_ATAC_1792		chr1	149911012	149911580	HT_ATAC_1792
		chr1	209739472	209739686	RT4_ATAC_1793		chr5	179125069	179126422	SW_ATAC_1793		chr1	113148261	113148938	SC_ATAC_1793		chr1	149967906	149968255	HT_ATAC_1793
		chr1	209750146	209750506	RT4_ATAC_1794		chr20	18447341	18448549	SW_ATAC_1794		chr1	113161489	113162067	SC_ATAC_1794		chr1	149981608	149981945	HT_ATAC_1794
		chr1	209822745	209822936	RT4_ATAC_1795		chr7	148395224	148396984	SW_ATAC_1795		chr1	113162173	113162712	SC_ATAC_1795		chr1	149982094	149983028	HT_ATAC_1795
		chr1	209824705	209824875	RT4_ATAC_1796		chr20	56963810	56965043	SW_ATAC_1796		chr1	113216812	113218075	SC_ATAC_1796		chr1	149989391	149989668	HT_ATAC_1796
		chr1	209825601	209826073	RT4_ATAC_1797		chr6	71377172	71378407	SW_ATAC_1797		chr1	113229887	113230369	SC_ATAC_1797		chr1	150038843	150040076	HT_ATAC_1797
		chr1	209826366	209826716	RT4_ATAC_1798		chr4	142557142	142558510	SW_ATAC_1798		chr1	113247490	113248238	SC_ATAC_1798		chr1	150121626	150122477	HT_ATAC_1798
		chr1	209848380	209848909	RT4_ATAC_1799		chr4	141294414	141295565	SW_ATAC_1799		chr1	113249707	113250199	SC_ATAC_1799		chr1	150185823	150186362	HT_ATAC_1799
		chr1	209921006	209921463	RT4_ATAC_1800		chr1	47184236	47185816	SW_ATAC_1800		chr1	113257477	113258460	SC_ATAC_1800		chr1	150206705	150207794	HT_ATAC_1800
		chr1	209957627	209957721	RT4_ATAC_1801		chr12	42537743	42539229	SW_ATAC_1801		chr1	113258959	113259173	SC_ATAC_1801		chr1	150208013	150209025	HT_ATAC_1801
		chr1	209957817	209958226	RT4_ATAC_1802		chr3	27410198	27411221	SW_ATAC_1802		chr1	113278392	113278698	SC_ATAC_1802		chr1	150228183	150228596	HT_ATAC_1802
		chr1	209978883	209979943	RT4_ATAC_1803		chr17	49337033	49338793	SW_ATAC_1803		chr1	113346901	113347096	SC_ATAC_1803		chr1	150240642	150241803	HT_ATAC_1803
		chr1	209988982	209990051	RT4_ATAC_1804		chr1	211848360	211849564	SW_ATAC_1804		chr1	113447639	113447878	SC_ATAC_1804		chr1	150253793	150255390	HT_ATAC_1804
		chr1	209999257	209999412	RT4_ATAC_1805		chr19	38826172	38827847	SW_ATAC_1805		chr1	113497919	113499701	SC_ATAC_1805		chr1	150266107	150266889	HT_ATAC_1805
		chr1	210001139	210001719	RT4_ATAC_1806		chr5	160350419	160351672	SW_ATAC_1806		chr1	113577752	113578512	SC_ATAC_1806		chr1	150293505	150294475	HT_ATAC_1806
		chr1	210058081	210058339	RT4_ATAC_1807		chr11	110227467	110228755	SW_ATAC_1807		chr1	113615290	113616304	SC_ATAC_1807		chr1	150336053	150337451	HT_ATAC_1807
		chr1	210405771	210406392	RT4_ATAC_1808		chr7	134854415	134855835	SW_ATAC_1808		chr1	113734042	113734759	SC_ATAC_1808		chr1	150459469	150460111	HT_ATAC_1808
		chr1	210406524	210407333	RT4_ATAC_1809		chr19	56825483	56826991	SW_ATAC_1809		chr1	113850878	113851274	SC_ATAC_1809		chr1	150480415	150480930	HT_ATAC_1809
		chr1	210407437	210407658	RT4_ATAC_1810		chr14	97263424	97264553	SW_ATAC_1810		chr1	113932578	113933174	SC_ATAC_1810		chr1	150487588	150488644	HT_ATAC_1810
		chr1	210424463	210424996	RT4_ATAC_1811		chr4	42657998	42659842	SW_ATAC_1811		chr1	113999613	113999941	SC_ATAC_1811		chr1	150508170	150508805	HT_ATAC_1811
		chr1	210484552	210484997	RT4_ATAC_1812		chr2	122512548	122513856	SW_ATAC_1812		chr1	114084445	114085042	SC_ATAC_1812		chr1	150510106	150511124	HT_ATAC_1812
		chr1	210501894	210503030	RT4_ATAC_1813		chr21	30445228	30446546	SW_ATAC_1813		chr1	114301371	114302396	SC_ATAC_1813		chr1	150521155	150521927	HT_ATAC_1813
		chr1	210539918	210540784	RT4_ATAC_1814		chr3	142297149	142298442	SW_ATAC_1814		chr1	114354168	114355319	SC_ATAC_1814		chr1	150523120	150523443	HT_ATAC_1814
		chr1	210546959	210547648	RT4_ATAC_1815		chr1	178062295	178063899	SW_ATAC_1815		chr1	114446984	114448055	SC_ATAC_1815		chr1	150524299	150525069	HT_ATAC_1815
		chr1	210547771	210548097	RT4_ATAC_1816		chr8	95565381	95566799	SW_ATAC_1816		chr1	114471695	114473052	SC_ATAC_1816		chr1	150532494	150532759	HT_ATAC_1816
		chr1	210573685	210574257	RT4_ATAC_1817		chr12	98908689	98910460	SW_ATAC_1817		chr1	114888774	114889082	SC_ATAC_1817		chr1	150533459	150534784	HT_ATAC_1817
		chr1	210757785	210758163	RT4_ATAC_1818		chr3	185826673	185827732	SW_ATAC_1818		chr1	114889167	114889490	SC_ATAC_1818		chr1	150540288	150541272	HT_ATAC_1818
		chr1	210770836	210771954	RT4_ATAC_1819		chr3	9289450	9291730	SW_ATAC_1819		chr1	115052885	115054239	SC_ATAC_1819		chr1	150551074	150552569	HT_ATAC_1819
		chr1	211256148	211256682	RT4_ATAC_1820		chr5	137089457	137090839	SW_ATAC_1820		chr1	115123787	115124500	SC_ATAC_1820		chr1	150576821	150577705	HT_ATAC_1820
		chr1	211432041	211433342	RT4_ATAC_1821		chr10	64576050	64577280	SW_ATAC_1821		chr1	115153221	115153912	SC_ATAC_1821		chr1	150596503	150597024	HT_ATAC_1821
		chr1	211433574	211433743	RT4_ATAC_1822		chr14	31925996	31926906	SW_ATAC_1822		chr1	115212217	115213530	SC_ATAC_1822		chr1	150601571	150602571	HT_ATAC_1822
		chr1	211555930	211556417	RT4_ATAC_1823		chr2	180871154	180872236	SW_ATAC_1823		chr1	115259318	115259573	SC_ATAC_1823		chr1	150669165	150669310	HT_ATAC_1823
		chr1	211556499	211556794	RT4_ATAC_1824		chr1	235530321	235531335	SW_ATAC_1824		chr1	115299599	115300334	SC_ATAC_1824		chr1	150669502	150670015	HT_ATAC_1824
		chr1	211589620	211590670	RT4_ATAC_1825		chr1	6051627	6053493	SW_ATAC_1825		chr1	115300507	115300868	SC_ATAC_1825		chr1	150848648	150849509	HT_ATAC_1825
		chr1	211643131	211643672	RT4_ATAC_1826		chr11	129716235	129717584	SW_ATAC_1826		chr1	115322855	115323483	SC_ATAC_1826		chr1	150898030	150899209	HT_ATAC_1826
		chr1	211687428	211687597	RT4_ATAC_1827		chr14	27289325	27290534	SW_ATAC_1827		chr1	115345399	115346055	SC_ATAC_1827		chr1	150946664	150946994	HT_ATAC_1827
		chr1	211688478	211689255	RT4_ATAC_1828		chr6	111135559	111137403	SW_ATAC_1828		chr1	115594586	115594947	SC_ATAC_1828		chr1	150953686	150954824	HT_ATAC_1828
		chr1	211715440	211715855	RT4_ATAC_1829		chr11	93473971	93475444	SW_ATAC_1829		chr1	115605070	115605697	SC_ATAC_1829		chr1	150978923	150979703	HT_ATAC_1829
		chr1	211716317	211716658	RT4_ATAC_1830		chr1	228352897	228354488	SW_ATAC_1830		chr1	115632048	115632382	SC_ATAC_1830		chr1	150980448	150981303	HT_ATAC_1830
		chr1	211724960	211725488	RT4_ATAC_1831		chr4	53587997	53588997	SW_ATAC_1831		chr1	115632482	115632797	SC_ATAC_1831		chr1	151031195	151031428	HT_ATAC_1831
		chr1	211751143	211751526	RT4_ATAC_1832		chr18	29522191	29523871	SW_ATAC_1832		chr1	115675624	115676346	SC_ATAC_1832		chr1	151031646	151032261	HT_ATAC_1832
		chr1	211751608	211753215	RT4_ATAC_1833		chr6	123109909	123111776	SW_ATAC_1833		chr1	115677687	115678162	SC_ATAC_1833		chr1	151042877	151044008	HT_ATAC_1833
		chr1	211775662	211775918	RT4_ATAC_1834		chr5	131801937	131803033	SW_ATAC_1834		chr1	115710692	115711152	SC_ATAC_1834		chr1	151118657	151119742	HT_ATAC_1834
		chr1	211827160	211827816	RT4_ATAC_1835		chr3	195162638	195164222	SW_ATAC_1835		chr1	115711292	115711734	SC_ATAC_1835		chr1	151128587	151128762	HT_ATAC_1835
		chr1	211828603	211828837	RT4_ATAC_1836		chrX	2526701	2528350	SW_ATAC_1836		chr1	115727425	115727958	SC_ATAC_1836		chr1	151137505	151137897	HT_ATAC_1836
		chr1	211840072	211841042	RT4_ATAC_1837		chr2	202897338	202899772	SW_ATAC_1837		chr1	115732540	115733094	SC_ATAC_1837		chr1	151138063	151139163	HT_ATAC_1837
		chr1	211848547	211849479	RT4_ATAC_1838		chr12	27862946	27864606	SW_ATAC_1838		chr1	115765237	115765932	SC_ATAC_1838		chr1	151162011	151162822	HT_ATAC_1838
		chr1	211854142	211854342	RT4_ATAC_1839		chr19	42772287	42773463	SW_ATAC_1839		chr1	115879983	115880528	SC_ATAC_1839		chr1	151167589	151167991	HT_ATAC_1839
		chr1	212003504	212004307	RT4_ATAC_1840		chr4	184019329	184021287	SW_ATAC_1840		chr1	115880714	115881045	SC_ATAC_1840		chr1	151170250	151171516	HT_ATAC_1840
		chr1	212017142	212017656	RT4_ATAC_1841		chr14	89258363	89259859	SW_ATAC_1841		chr1	116088253	116089229	SC_ATAC_1841		chr1	151226930	151227556	HT_ATAC_1841
		chr1	212101570	212102264	RT4_ATAC_1842		chr3	101292283	101293990	SW_ATAC_1842		chr1	116138417	116138731	SC_ATAC_1842		chr1	151253581	151255561	HT_ATAC_1842
		chr1	212102388	212102669	RT4_ATAC_1843		chr11	106576873	106577618	SW_ATAC_1843		chr1	116184239	116185761	SC_ATAC_1843		chr1	151284089	151284925	HT_ATAC_1843
		chr1	212118166	212118498	RT4_ATAC_1844		chr11	126173270	126174856	SW_ATAC_1844		chr1	116197609	116198526	SC_ATAC_1844		chr1	151299475	151300849	HT_ATAC_1844
		chr1	212185377	212185558	RT4_ATAC_1845		chr20	6571401	6572552	SW_ATAC_1845		chr1	116213800	116214581	SC_ATAC_1845		chr1	151319231	151320160	HT_ATAC_1845
		chr1	212208099	212209155	RT4_ATAC_1846		chr1	175160917	175162646	SW_ATAC_1846		chr1	116257119	116257888	SC_ATAC_1846		chr1	151371617	151372623	HT_ATAC_1846
		chr1	212434120	212435028	RT4_ATAC_1847		chr20	58514614	58516182	SW_ATAC_1847		chr1	116290986	116291326	SC_ATAC_1847		chr1	151431422	151432305	HT_ATAC_1847
		chr1	212458024	212459302	RT4_ATAC_1848		chr18	12946849	12948753	SW_ATAC_1848		chr1	116314317	116314770	SC_ATAC_1848		chr1	151483506	151484614	HT_ATAC_1848
		chr1	212587593	212588554	RT4_ATAC_1849		chr12	104359392	104360272	SW_ATAC_1849		chr1	116325157	116325954	SC_ATAC_1849		chr1	151485286	151485855	HT_ATAC_1849
		chr1	212606077	212606684	RT4_ATAC_1850		chr15	99557561	99559212	SW_ATAC_1850		chr1	116520169	116520472	SC_ATAC_1850		chr1	151511896	151513259	HT_ATAC_1850
		chr1	212659159	212659834	RT4_ATAC_1851		chr14	23754423	23756029	SW_ATAC_1851		chr1	116674545	116675136	SC_ATAC_1851		chr1	151519437	151520623	HT_ATAC_1851
		chr1	212732067	212732536	RT4_ATAC_1852		chr14	23340287	23342074	SW_ATAC_1852		chr1	116694368	116695177	SC_ATAC_1852		chr1	151521323	151521775	HT_ATAC_1852
		chr1	212769523	212770067	RT4_ATAC_1853		chr8	106529973	106531012	SW_ATAC_1853		chr1	116832389	116833503	SC_ATAC_1853		chr1	151554447	151554773	HT_ATAC_1853
		chr1	212781602	212782950	RT4_ATAC_1854		chr3	90110813	90111547	SW_ATAC_1854		chr1	116883184	116883807	SC_ATAC_1854		chr1	151557994	151558348	HT_ATAC_1854
		chr1	212838664	212839113	RT4_ATAC_1855		chr6	5260393	5261971	SW_ATAC_1855		chr1	116915300	116916054	SC_ATAC_1855		chr1	151583754	151583910	HT_ATAC_1855
		chr1	212894626	212895505	RT4_ATAC_1856		chr1	68298386	68299430	SW_ATAC_1856		chr1	116919247	116919384	SC_ATAC_1856		chr1	151584278	151585351	HT_ATAC_1856
		chr1	212964735	212965766	RT4_ATAC_1857		chr2	208497331	208498248	SW_ATAC_1857		chr1	116961006	116961484	SC_ATAC_1857		chr1	151735490	151736641	HT_ATAC_1857
		chr1	213030957	213031944	RT4_ATAC_1858		chr7	38948068	38949121	SW_ATAC_1858		chr1	117051381	117052216	SC_ATAC_1858		chr1	151762525	151764031	HT_ATAC_1858
		chr1	213123692	213124351	RT4_ATAC_1859		chr19	47163966	47164949	SW_ATAC_1859		chr1	117057604	117058314	SC_ATAC_1859		chr1	151881668	151882446	HT_ATAC_1859
		chr1	213188493	213189304	RT4_ATAC_1860		chr6	131456283	131457541	SW_ATAC_1860		chr1	117080027	117080507	SC_ATAC_1860		chr1	151918188	151919073	HT_ATAC_1860
		chr1	213224247	213225130	RT4_ATAC_1861		chr11	100731792	100732584	SW_ATAC_1861		chr1	117099090	117099555	SC_ATAC_1861		chr1	151962066	151962239	HT_ATAC_1861
		chr1	213638043	213638932	RT4_ATAC_1862		chr1	171710470	171712008	SW_ATAC_1862		chr1	117112591	117113873	SC_ATAC_1862		chr1	151964907	151965406	HT_ATAC_1862
		chr1	213952536	213953087	RT4_ATAC_1863		chr7	83097408	83098096	SW_ATAC_1863		chr1	117131839	117132399	SC_ATAC_1863		chr1	151966050	151966732	HT_ATAC_1863
		chr1	214158208	214158874	RT4_ATAC_1864		chr3	42631694	42633121	SW_ATAC_1864		chr1	117209988	117210676	SC_ATAC_1864		chr1	151996681	151997292	HT_ATAC_1864
		chr1	214161152	214161415	RT4_ATAC_1865		chr4	120220948	120222260	SW_ATAC_1865		chr1	117236455	117237018	SC_ATAC_1865		chr1	152006980	152007819	HT_ATAC_1865
		chr1	214276142	214276605	RT4_ATAC_1866		chr1	159046217	159047468	SW_ATAC_1866		chr1	117239299	117239558	SC_ATAC_1866		chr1	152008767	152009174	HT_ATAC_1866
		chr1	214296514	214296798	RT4_ATAC_1867		chr3	16305956	16307045	SW_ATAC_1867		chr1	117396368	117396576	SC_ATAC_1867		chr1	152009374	152009621	HT_ATAC_1867
		chr1	214434927	214435137	RT4_ATAC_1868		chr5	162836305	162837093	SW_ATAC_1868		chr1	117429115	117429792	SC_ATAC_1868		chr1	152020140	152021229	HT_ATAC_1868
		chr1	214435228	214435461	RT4_ATAC_1869		chr9	84352415	84353429	SW_ATAC_1869		chr1	117449406	117449930	SC_ATAC_1869		chr1	152140383	152140941	HT_ATAC_1869
		chr1	214454209	214455515	RT4_ATAC_1870		chr19	57790937	57792699	SW_ATAC_1870		chr1	117514939	117515714	SC_ATAC_1870		chr1	152161170	152161906	HT_ATAC_1870
		chr1	214502243	214502472	RT4_ATAC_1871		chr2	15309577	15311015	SW_ATAC_1871		chr1	117532994	117533805	SC_ATAC_1871		chr1	152474037	152474858	HT_ATAC_1871
		chr1	214503500	214503953	RT4_ATAC_1872		chr7	36406259	36407257	SW_ATAC_1872		chr1	117602046	117602199	SC_ATAC_1872		chr1	152475025	152475730	HT_ATAC_1872
		chr1	214612863	214613809	RT4_ATAC_1873		chr11	124492245	124493605	SW_ATAC_1873		chr1	117602312	117603007	SC_ATAC_1873		chr1	152828098	152828418	HT_ATAC_1873
		chr1	214619913	214620663	RT4_ATAC_1874		chr2	75937401	75938503	SW_ATAC_1874		chr1	117619907	117620238	SC_ATAC_1874		chr1	152830553	152830887	HT_ATAC_1874
		chr1	214640196	214640496	RT4_ATAC_1875		chr4	1722148	1723595	SW_ATAC_1875		chr1	117635649	117636163	SC_ATAC_1875		chr1	152878142	152879091	HT_ATAC_1875
		chr1	214640577	214640884	RT4_ATAC_1876		chr1	201986818	201988562	SW_ATAC_1876		chr1	117664000	117664947	SC_ATAC_1876		chr1	152926338	152927369	HT_ATAC_1876
		chr1	214650298	214650818	RT4_ATAC_1877		chr10	15209759	15211277	SW_ATAC_1877		chr1	117753140	117753928	SC_ATAC_1877		chr1	153189604	153190138	HT_ATAC_1877
		chr1	214655489	214655926	RT4_ATAC_1878		chr7	150724958	150726024	SW_ATAC_1878		chr1	117909104	117910311	SC_ATAC_1878		chr1	153328057	153328243	HT_ATAC_1878
		chr1	214724319	214725920	RT4_ATAC_1879		chr8	9412988	9414358	SW_ATAC_1879		chr1	118148144	118148252	SC_ATAC_1879		chr1	153488370	153488918	HT_ATAC_1879
		chr1	214746848	214747820	RT4_ATAC_1880		chr12	121124057	121125454	SW_ATAC_1880		chr1	118148346	118149288	SC_ATAC_1880		chr1	153508178	153509065	HT_ATAC_1880
		chr1	214776209	214776944	RT4_ATAC_1881		chr3	73045562	73047123	SW_ATAC_1881		chr1	118199694	118200030	SC_ATAC_1881		chr1	153516949	153518369	HT_ATAC_1881
		chr1	214810174	214810895	RT4_ATAC_1882		chr4	119199027	119200454	SW_ATAC_1882		chr1	118301178	118301932	SC_ATAC_1882		chr1	153538119	153539509	HT_ATAC_1882
		chr1	215178591	215178733	RT4_ATAC_1883		chr5	43514631	43516029	SW_ATAC_1883		chr1	118369142	118369779	SC_ATAC_1883		chr1	153540648	153541353	HT_ATAC_1883
		chr1	215287454	215288001	RT4_ATAC_1884		chr7	87856049	87856933	SW_ATAC_1884		chr1	118471506	118472689	SC_ATAC_1884		chr1	153550873	153551745	HT_ATAC_1884
		chr1	215673105	215673209	RT4_ATAC_1885		chr19	33462175	33463509	SW_ATAC_1885		chr1	118678991	118679390	SC_ATAC_1885		chr1	153580758	153580980	HT_ATAC_1885
		chr1	215740298	215741448	RT4_ATAC_1886		chr3	142314388	142315830	SW_ATAC_1886		chr1	118690018	118690527	SC_ATAC_1886		chr1	153581294	153582205	HT_ATAC_1886
		chr1	215743780	215744174	RT4_ATAC_1887		chr3	111392952	111394119	SW_ATAC_1887		chr1	118727391	118728402	SC_ATAC_1887		chr1	153605948	153607016	HT_ATAC_1887
		chr1	216018662	216019349	RT4_ATAC_1888		chr15	101261200	101262854	SW_ATAC_1888		chr1	118752065	118752958	SC_ATAC_1888		chr1	153630792	153631888	HT_ATAC_1888
		chr1	216394583	216395173	RT4_ATAC_1889		chr12	105628997	105630203	SW_ATAC_1889		chr1	119028337	119028708	SC_ATAC_1889		chr1	153642873	153644452	HT_ATAC_1889
		chr1	216702133	216702652	RT4_ATAC_1890		chr7	7605586	7607148	SW_ATAC_1890		chr1	119543851	119544386	SC_ATAC_1890		chr1	153650070	153650688	HT_ATAC_1890
		chr1	216740277	216740412	RT4_ATAC_1891		chr1	211432091	211433339	SW_ATAC_1891		chr1	119544493	119544609	SC_ATAC_1891		chr1	153680523	153680746	HT_ATAC_1891
		chr1	216774092	216774981	RT4_ATAC_1892		chr11	117014613	117015620	SW_ATAC_1892		chr1	119544715	119545070	SC_ATAC_1892		chr1	153681092	153681304	HT_ATAC_1892
		chr1	216896311	216897177	RT4_ATAC_1893		chr7	151424453	151425367	SW_ATAC_1893		chr1	119623018	119623798	SC_ATAC_1893		chr1	153700230	153700705	HT_ATAC_1893
		chr1	217057795	217058474	RT4_ATAC_1894		chr2	21021857	21023133	SW_ATAC_1894		chr1	119682550	119682752	SC_ATAC_1894		chr1	153747450	153748923	HT_ATAC_1894
		chr1	217075901	217077169	RT4_ATAC_1895		chr2	197155972	197157617	SW_ATAC_1895		chr1	119682843	119683544	SC_ATAC_1895		chr1	153755862	153756376	HT_ATAC_1895
		chr1	217202469	217203417	RT4_ATAC_1896		chr2	56968514	56969276	SW_ATAC_1896		chr1	119796680	119797312	SC_ATAC_1896		chr1	153894983	153896046	HT_ATAC_1896
		chr1	217250209	217250558	RT4_ATAC_1897		chr3	110789493	110791706	SW_ATAC_1897		chr1	119822052	119822622	SC_ATAC_1897		chr1	153918198	153919344	HT_ATAC_1897
		chr1	217251287	217252053	RT4_ATAC_1898		chr18	29962307	29963650	SW_ATAC_1898		chr1	120018562	120018743	SC_ATAC_1898		chr1	153930674	153931335	HT_ATAC_1898
		chr1	217262840	217263314	RT4_ATAC_1899		chr8	99057438	99058672	SW_ATAC_1899		chr1	120190212	120191454	SC_ATAC_1899		chr1	153935627	153936818	HT_ATAC_1899
		chr1	217308570	217309205	RT4_ATAC_1900		chr19	41283174	41284738	SW_ATAC_1900		chr1	120216586	120217163	SC_ATAC_1900		chr1	153949350	153950589	HT_ATAC_1900
		chr1	217521961	217522889	RT4_ATAC_1901		chr2	178076827	178078209	SW_ATAC_1901		chr1	120217397	120217771	SC_ATAC_1901		chr1	153958762	153958966	HT_ATAC_1901
		chr1	217542427	217543269	RT4_ATAC_1902		chr2	74648328	74649549	SW_ATAC_1902		chr1	120229048	120229903	SC_ATAC_1902		chr1	153963038	153963487	HT_ATAC_1902
		chr1	217543359	217543641	RT4_ATAC_1903		chr2	168148899	168150116	SW_ATAC_1903		chr1	120254343	120255540	SC_ATAC_1903		chr1	154154669	154156225	HT_ATAC_1903
		chr1	217689681	217690198	RT4_ATAC_1904		chr7	16706818	16708388	SW_ATAC_1904		chr1	120289774	120290318	SC_ATAC_1904		chr1	154192561	154194177	HT_ATAC_1904
		chr1	217804121	217804523	RT4_ATAC_1905		chr14	27310524	27311906	SW_ATAC_1905		chr1	120325425	120326321	SC_ATAC_1905		chr1	154244344	154245495	HT_ATAC_1905
		chr1	217804607	217804783	RT4_ATAC_1906		chr2	54556797	54558316	SW_ATAC_1906		chr1	120543889	120544105	SC_ATAC_1906		chr1	154377375	154378777	HT_ATAC_1906
		chr1	217833725	217834365	RT4_ATAC_1907		chr16	53075479	53076254	SW_ATAC_1907		chr1	120587452	120588054	SC_ATAC_1907		chr1	154405697	154406133	HT_ATAC_1907
		chr1	218035446	218035930	RT4_ATAC_1908		chr19	36979769	36981559	SW_ATAC_1908		chr1	120611103	120611578	SC_ATAC_1908		chr1	154531007	154532275	HT_ATAC_1908
		chr1	218198160	218199182	RT4_ATAC_1909		chr7	91874277	91876428	SW_ATAC_1909		chr1	120611792	120612703	SC_ATAC_1909		chr1	154580330	154580889	HT_ATAC_1909
		chr1	218285975	218286774	RT4_ATAC_1910		chr20	42838486	42840519	SW_ATAC_1910		chr1	120623831	120624396	SC_ATAC_1910		chr1	154842619	154843120	HT_ATAC_1910
		chr1	218330022	218330271	RT4_ATAC_1911		chr15	99270006	99271642	SW_ATAC_1911		chr1	120630607	120630846	SC_ATAC_1911		chr1	154908646	154910201	HT_ATAC_1911
		chr1	218337468	218338651	RT4_ATAC_1912		chr14	76126987	76128113	SW_ATAC_1912		chr1	120807963	120808707	SC_ATAC_1912		chr1	154933732	154934981	HT_ATAC_1912
		chr1	218457973	218458720	RT4_ATAC_1913		chr12	14955689	14957270	SW_ATAC_1913		chr1	120838265	120839034	SC_ATAC_1913		chr1	154943150	154943751	HT_ATAC_1913
		chr1	218458809	218458935	RT4_ATAC_1914		chr10	82189049	82189872	SW_ATAC_1914		chr1	120925274	120926106	SC_ATAC_1914		chr1	154946165	154946431	HT_ATAC_1914
		chr1	218472828	218472983	RT4_ATAC_1915		chr10	77054257	77055478	SW_ATAC_1915		chr1	121116733	121117285	SC_ATAC_1915		chr1	154946661	154947540	HT_ATAC_1915
		chr1	218550423	218551175	RT4_ATAC_1916		chr2	38603379	38605065	SW_ATAC_1916		chr1	121315648	121316173	SC_ATAC_1916		chr1	154955341	154956250	HT_ATAC_1916
		chr1	218633186	218633558	RT4_ATAC_1917		chr12	67877136	67878532	SW_ATAC_1917		chr1	143913091	143914383	SC_ATAC_1917		chr1	154973274	154973852	HT_ATAC_1917
		chr1	218658985	218659098	RT4_ATAC_1918		chr5	15008499	15009017	SW_ATAC_1918		chr1	143943404	143944191	SC_ATAC_1918		chr1	154974161	154975348	HT_ATAC_1918
		chr1	218672412	218672529	RT4_ATAC_1919		chr2	55919969	55921180	SW_ATAC_1919		chr1	144010549	144011296	SC_ATAC_1919		chr1	154989677	154990389	HT_ATAC_1919
		chr1	219347063	219347623	RT4_ATAC_1920		chr1	225965157	225966149	SW_ATAC_1920		chr1	144012610	144013150	SC_ATAC_1920		chr1	155022916	155024726	HT_ATAC_1920
		chr1	219350787	219351163	RT4_ATAC_1921		chrX	74493406	74494936	SW_ATAC_1921		chr1	144028418	144029182	SC_ATAC_1921		chr1	155036027	155036853	HT_ATAC_1921
		chr1	219452654	219453555	RT4_ATAC_1922		chr7	19997332	19998562	SW_ATAC_1922		chr1	144030858	144031235	SC_ATAC_1922		chr1	155057074	155058429	HT_ATAC_1922
		chr1	219559271	219559450	RT4_ATAC_1923		chr19	30335223	30336877	SW_ATAC_1923		chr1	144072170	144072896	SC_ATAC_1923		chr1	155096851	155097429	HT_ATAC_1923
		chr1	219634226	219634905	RT4_ATAC_1924		chr8	133787207	133788284	SW_ATAC_1924		chr1	144094807	144095530	SC_ATAC_1924		chr1	155097957	155098202	HT_ATAC_1924
		chr1	219884052	219884749	RT4_ATAC_1925		chr4	164415257	164416496	SW_ATAC_1925		chr1	144533606	144533870	SC_ATAC_1925		chr1	155102097	155102561	HT_ATAC_1925
		chr1	219930777	219931434	RT4_ATAC_1926		chr17	62971026	62972469	SW_ATAC_1926		chr1	144533976	144534452	SC_ATAC_1926		chr1	155107395	155107957	HT_ATAC_1926
		chr1	220011147	220011321	RT4_ATAC_1927		chr4	124072	125639	SW_ATAC_1927		chr1	144537859	144538446	SC_ATAC_1927		chr1	155108111	155108567	HT_ATAC_1927
		chr1	220112144	220112460	RT4_ATAC_1928		chr12	104613170	104614453	SW_ATAC_1928		chr1	144581235	144581355	SC_ATAC_1928		chr1	155112778	155113127	HT_ATAC_1928
		chr1	220219210	220220167	RT4_ATAC_1929		chr14	77473527	77474779	SW_ATAC_1929		chr1	144593530	144594154	SC_ATAC_1929		chr1	155162690	155163595	HT_ATAC_1929
		chr1	220263074	220263343	RT4_ATAC_1930		chr14	73924165	73925839	SW_ATAC_1930		chr1	144707561	144707937	SC_ATAC_1930		chr1	155178300	155179256	HT_ATAC_1930
		chr1	220263456	220263582	RT4_ATAC_1931		chr5	52284322	52285903	SW_ATAC_1931		chr1	144891656	144892660	SC_ATAC_1931		chr1	155196303	155196976	HT_ATAC_1931
		chr1	220267253	220268135	RT4_ATAC_1932		chr7	66056452	66057761	SW_ATAC_1932		chr1	144918082	144918302	SC_ATAC_1932		chr1	155197155	155197780	HT_ATAC_1932
		chr1	220292430	220292807	RT4_ATAC_1933		chr5	912291	913180	SW_ATAC_1933		chr1	144931631	144932732	SC_ATAC_1933		chr1	155214335	155214959	HT_ATAC_1933
		chr1	220445485	220446371	RT4_ATAC_1934		chr16	50430449	50431571	SW_ATAC_1934		chr1	144982466	144983474	SC_ATAC_1934		chr1	155225105	155225938	HT_ATAC_1934
		chr1	220454471	220454890	RT4_ATAC_1935		chr2	157037779	157039241	SW_ATAC_1935		chr1	145009172	145009707	SC_ATAC_1935		chr1	155231448	155232472	HT_ATAC_1935
		chr1	220499905	220500284	RT4_ATAC_1936		chr14	99946319	99948060	SW_ATAC_1936		chr1	145009816	145009916	SC_ATAC_1936		chr1	155242509	155243657	HT_ATAC_1936
		chr1	220510490	220511226	RT4_ATAC_1937		chr10	38145895	38147363	SW_ATAC_1937		chr1	145028764	145028927	SC_ATAC_1937		chr1	155246832	155247565	HT_ATAC_1937
		chr1	220541740	220542556	RT4_ATAC_1938		chr13	103497751	103499412	SW_ATAC_1938		chr1	145039289	145040388	SC_ATAC_1938		chr1	155278121	155279534	HT_ATAC_1938
		chr1	220543835	220544019	RT4_ATAC_1939		chr14	50234196	50235820	SW_ATAC_1939		chr1	145096271	145096778	SC_ATAC_1939		chr1	155292878	155295320	HT_ATAC_1939
		chr1	220631174	220631647	RT4_ATAC_1940		chr2	152684077	152685477	SW_ATAC_1940		chr1	145138948	145139951	SC_ATAC_1940		chr1	155531799	155533458	HT_ATAC_1940
		chr1	220660620	220661129	RT4_ATAC_1941		chr14	54907543	54908754	SW_ATAC_1941		chr1	145195594	145196391	SC_ATAC_1941		chr1	155579526	155580465	HT_ATAC_1941
		chr1	220689191	220690353	RT4_ATAC_1942		chr1	166844882	166846043	SW_ATAC_1942		chr1	145208672	145209586	SC_ATAC_1942		chr1	155620949	155621523	HT_ATAC_1942
		chr1	220700631	220701077	RT4_ATAC_1943		chr1	78469700	78470709	SW_ATAC_1943		chr1	145209682	145210358	SC_ATAC_1943		chr1	155657611	155659286	HT_ATAC_1943
		chr1	220863475	220864148	RT4_ATAC_1944		chr12	56366880	56368344	SW_ATAC_1944		chr1	145216285	145217427	SC_ATAC_1944		chr1	155715132	155715962	HT_ATAC_1944
		chr1	220907901	220908334	RT4_ATAC_1945		chr7	111200873	111202956	SW_ATAC_1945		chr1	145233371	145233995	SC_ATAC_1945		chr1	155826580	155827375	HT_ATAC_1945
		chr1	220921248	220922272	RT4_ATAC_1946		chr2	42587739	42589418	SW_ATAC_1946		chr1	145382718	145383179	SC_ATAC_1946		chr1	155903901	155904603	HT_ATAC_1946
		chr1	220959808	220960903	RT4_ATAC_1947		chr12	104679783	104681249	SW_ATAC_1947		chr1	145395471	145395931	SC_ATAC_1947		chr1	155931620	155932306	HT_ATAC_1947
		chr1	221376901	221377079	RT4_ATAC_1948		chr3	111804521	111806012	SW_ATAC_1948		chr1	145396631	145397548	SC_ATAC_1948		chr1	155989701	155991043	HT_ATAC_1948
		chr1	221508416	221509312	RT4_ATAC_1949		chr1	45139450	45140535	SW_ATAC_1949		chr1	145437885	145438525	SC_ATAC_1949		chr1	156023250	156024188	HT_ATAC_1949
		chr1	221509406	221509540	RT4_ATAC_1950		chr1	47799067	47800577	SW_ATAC_1950		chr1	145449369	145449989	SC_ATAC_1950		chr1	156024346	156025055	HT_ATAC_1950
		chr1	221566475	221567599	RT4_ATAC_1951		chr3	178978469	178979598	SW_ATAC_1951		chr1	145455076	145456251	SC_ATAC_1951		chr1	156030603	156031561	HT_ATAC_1951
		chr1	221613184	221613829	RT4_ATAC_1952		chr6	90347728	90348878	SW_ATAC_1952		chr1	145470126	145470562	SC_ATAC_1952		chr1	156032037	156032371	HT_ATAC_1952
		chr1	221635737	221636026	RT4_ATAC_1953		chr18	32923623	32924798	SW_ATAC_1953		chr1	145476817	145477825	SC_ATAC_1953		chr1	156066463	156066697	HT_ATAC_1953
		chr1	221643461	221644137	RT4_ATAC_1954		chr16	50099655	50100778	SW_ATAC_1954		chr1	145507379	145507955	SC_ATAC_1954		chr1	156075693	156076442	HT_ATAC_1954
		chr1	221651466	221651683	RT4_ATAC_1955		chr2	17934405	17935945	SW_ATAC_1955		chr1	145515424	145516580	SC_ATAC_1955		chr1	156083947	156085196	HT_ATAC_1955
		chr1	221661162	221661511	RT4_ATAC_1956		chr14	21944421	21945861	SW_ATAC_1956		chr1	145542648	145543359	SC_ATAC_1956		chr1	156085769	156086170	HT_ATAC_1956
		chr1	221808786	221809355	RT4_ATAC_1957		chr7	75947109	75948436	SW_ATAC_1957		chr1	145548848	145549442	SC_ATAC_1957		chr1	156093090	156093915	HT_ATAC_1957
		chr1	221914785	221915876	RT4_ATAC_1958		chr9	88968572	88969857	SW_ATAC_1958		chr1	145574887	145576158	SC_ATAC_1958		chr1	156095954	156096405	HT_ATAC_1958
		chr1	221915956	221916832	RT4_ATAC_1959		chrX	85402680	85404771	SW_ATAC_1959		chr1	145610532	145611554	SC_ATAC_1959		chr1	156099664	156100356	HT_ATAC_1959
		chr1	222005563	222005901	RT4_ATAC_1960		chr2	163589506	163590215	SW_ATAC_1960		chr1	145652333	145652647	SC_ATAC_1960		chr1	156163303	156164169	HT_ATAC_1960
		chr1	222042320	222042626	RT4_ATAC_1961		chr1	225116966	225118303	SW_ATAC_1961		chr1	145713294	145714469	SC_ATAC_1961		chr1	156216922	156217293	HT_ATAC_1961
		chr1	222060170	222061108	RT4_ATAC_1962		chr2	171785300	171786589	SW_ATAC_1962		chr1	145728246	145728807	SC_ATAC_1962		chr1	156251949	156253223	HT_ATAC_1962
		chr1	222628328	222628737	RT4_ATAC_1963		chr3	138552188	138554336	SW_ATAC_1963		chr1	145743979	145744579	SC_ATAC_1963		chr1	156253950	156254163	HT_ATAC_1963
		chr1	222638531	222639303	RT4_ATAC_1964		chr3	72771866	72773631	SW_ATAC_1964		chr1	145749683	145750297	SC_ATAC_1964		chr1	156307622	156308714	HT_ATAC_1964
		chr1	222762815	222763590	RT4_ATAC_1965		chr9	119599347	119600808	SW_ATAC_1965		chr1	145826353	145827271	SC_ATAC_1965		chr1	156391061	156391727	HT_ATAC_1965
		chr1	222790805	222791290	RT4_ATAC_1966		chr13	53023996	53025030	SW_ATAC_1966		chr1	145938154	145938239	SC_ATAC_1966		chr1	156426293	156427547	HT_ATAC_1966
		chr1	222817109	222818299	RT4_ATAC_1967		chr3	180396874	180398167	SW_ATAC_1967		chr1	145938326	145939087	SC_ATAC_1967		chr1	156470296	156471556	HT_ATAC_1967
		chr1	222885278	222885961	RT4_ATAC_1968		chr4	82392232	82393738	SW_ATAC_1968		chr1	145968884	145969484	SC_ATAC_1968		chr1	156541293	156542718	HT_ATAC_1968
		chr1	222886046	222886218	RT4_ATAC_1969		chr3	141658673	141660259	SW_ATAC_1969		chr1	145969606	145969784	SC_ATAC_1969		chr1	156561092	156562054	HT_ATAC_1969
		chr1	222886498	222886953	RT4_ATAC_1970		chr2	86332569	86333821	SW_ATAC_1970		chr1	146153006	146153124	SC_ATAC_1970		chr1	156570801	156571620	HT_ATAC_1970
		chr1	222978324	222979031	RT4_ATAC_1971		chr11	85779067	85781150	SW_ATAC_1971		chr1	146555717	146556355	SC_ATAC_1971		chr1	156629804	156630402	HT_ATAC_1971
		chr1	222988051	222988819	RT4_ATAC_1972		chr1	93645141	93646864	SW_ATAC_1972		chr1	146556466	146556829	SC_ATAC_1972		chr1	156659337	156659482	HT_ATAC_1972
		chr1	223254506	223255019	RT4_ATAC_1973		chr5	52095165	52096992	SW_ATAC_1973		chr1	146638647	146639287	SC_ATAC_1973		chr1	156679539	156679886	HT_ATAC_1973
		chr1	223296927	223297328	RT4_ATAC_1974		chr3	122920266	122921639	SW_ATAC_1974		chr1	146643593	146644615	SC_ATAC_1974		chr1	156698152	156699059	HT_ATAC_1974
		chr1	223306947	223307693	RT4_ATAC_1975		chr3	114168133	114169166	SW_ATAC_1975		chr1	146713951	146715264	SC_ATAC_1975		chr1	156710454	156711309	HT_ATAC_1975
		chr1	223316015	223316745	RT4_ATAC_1976		chr6	53223426	53225543	SW_ATAC_1976		chr1	146966902	146967043	SC_ATAC_1976		chr1	156716348	156717439	HT_ATAC_1976
		chr1	223537398	223538226	RT4_ATAC_1977		chr16	75339122	75340502	SW_ATAC_1977		chr1	147070851	147072124	SC_ATAC_1977		chr1	156721487	156722327	HT_ATAC_1977
		chr1	223826975	223827397	RT4_ATAC_1978		chr5	14035517	14037637	SW_ATAC_1978		chr1	147112638	147113208	SC_ATAC_1978		chr1	156736897	156737525	HT_ATAC_1978
		chr1	223842620	223843193	RT4_ATAC_1979		chr5	42950344	42951291	SW_ATAC_1979		chr1	147141668	147143045	SC_ATAC_1979		chr1	156783651	156784198	HT_ATAC_1979
		chr1	223853304	223853955	RT4_ATAC_1980		chr4	41991766	41993109	SW_ATAC_1980		chr1	147172202	147172584	SC_ATAC_1980		chr1	156866208	156867070	HT_ATAC_1980
		chr1	223900025	223900926	RT4_ATAC_1981		chr5	118658398	118660407	SW_ATAC_1981		chr1	147189124	147189839	SC_ATAC_1981		chr1	156890028	156890633	HT_ATAC_1981
		chr1	224019489	224019873	RT4_ATAC_1982		chr4	110888013	110889641	SW_ATAC_1982		chr1	147362398	147362593	SC_ATAC_1982		chr1	157015335	157016262	HT_ATAC_1982
		chr1	224033015	224033392	RT4_ATAC_1983		chr7	65564347	65565681	SW_ATAC_1983		chr1	147400305	147401295	SC_ATAC_1983		chr1	157059645	157060185	HT_ATAC_1983
		chr1	224033495	224034246	RT4_ATAC_1984		chr8	103768232	103769444	SW_ATAC_1984		chr1	147479864	147480837	SC_ATAC_1984		chr1	157101883	157102842	HT_ATAC_1984
		chr1	224370569	224371645	RT4_ATAC_1985		chr7	116311591	116312628	SW_ATAC_1985		chr1	147510773	147511237	SC_ATAC_1985		chr1	157106981	157108705	HT_ATAC_1985
		chr1	224517783	224517906	RT4_ATAC_1986		chr9	86594433	86596360	SW_ATAC_1986		chr1	147511349	147511766	SC_ATAC_1986		chr1	157133221	157133842	HT_ATAC_1986
		chr1	224544376	224545332	RT4_ATAC_1987		chr2	106071289	106072495	SW_ATAC_1987		chr1	147694809	147695005	SC_ATAC_1987		chr1	157333464	157334184	HT_ATAC_1987
		chr1	224622469	224622904	RT4_ATAC_1988		chr4	110650465	110651909	SW_ATAC_1988		chr1	147735688	147736343	SC_ATAC_1988		chr1	157459239	157459423	HT_ATAC_1988
		chr1	224642040	224642678	RT4_ATAC_1989		chr10	28591340	28592383	SW_ATAC_1989		chr1	147749875	147750476	SC_ATAC_1989		chr1	157475142	157475722	HT_ATAC_1989
		chr1	224691145	224691667	RT4_ATAC_1990		chr4	166143116	166144106	SW_ATAC_1990		chr1	147806477	147806933	SC_ATAC_1990		chr1	157550060	157550594	HT_ATAC_1990
		chr1	224752802	224753499	RT4_ATAC_1991		chr3	160166663	160167831	SW_ATAC_1991		chr1	147807047	147807468	SC_ATAC_1991		chr1	157894772	157895838	HT_ATAC_1991
[truncated: 39,995 more rows]
