# Supplementary material for: Subtype-associated epigenomic landscape and 3D genome structure in bladder cancer
Source: Genome Biol. 2021 Apr 15;22:105. doi: 10.1186/s13059-021-02325-y (PMC8048365; doi:10.1186/s13059-021-02325-y)
Supplement: Supplementary file 11 — Additional file 11: Table S10. TF motif analysis of luminal specific, basal specific and shared open-chromatin. Clusters at distal-enhancers. [file 13059_2021_2325_MOESM11_ESM.xlsx]

## Sheet: Table S10-MOTIF analysis
Supplementary Table S10: TF motif analysis of luminal specific, basal specific and shared open-chromatin clusters at distal-enhancers
	Motif	Gene	Group	`-LOG10(P)	SequenceFound (%)
	Fra2(bZIP)/Striatum-Fra2-ChIP-Seq(GSE43429)/Homer	Fra2	luminal_specific	166	0.3705
	Fra1(bZIP)/BT549-Fra1-ChIP-Seq(GSE46166)/Homer	Fra1	luminal_specific	161	0.413
	Atf3(bZIP)/GBM-ATF3-ChIP-Seq(GSE33912)/Homer	Atf3	luminal_specific	158	0.4477
	BATF(bZIP)/Th17-BATF-ChIP-Seq(GSE39756)/Homer	BATF	luminal_specific	150	0.4412
	Jun-AP1(bZIP)/K562-cJun-ChIP-Seq(GSE31477)/Homer	Jun-AP1	luminal_specific	148	0.2222
	JunB(bZIP)/DendriticCells-Junb-ChIP-Seq(GSE36099)/Homer	JunB	luminal_specific	147	0.3917
	Fosl2(bZIP)/3T3L1-Fosl2-ChIP-Seq(GSE56872)/Homer	Fosl2	luminal_specific	147	0.2733
	AP-1(bZIP)/ThioMac-PU.1-ChIP-Seq(GSE21512)/Homer	AP-1	luminal_specific	138	0.4563
	CTCF(Zf)/CD4+-CTCF-ChIP-Seq(Barski_et_al.)/Homer	CTCF	luminal_specific	96	0.1185
	Foxa2(Forkhead)/Liver-Foxa2-ChIP-Seq(GSE25694)/Homer	Foxa2	luminal_specific	90	0.5033
	FOXA1(Forkhead)/MCF7-FOXA1-ChIP-Seq(GSE26831)/Homer	FOXA1	luminal_specific	84	0.5842
	FOXM1(Forkhead)/MCF7-FOXM1-ChIP-Seq(GSE72977)/Homer	FOXM1	luminal_specific	84	0.5842
	FOXA1(Forkhead)/LNCAP-FOXA1-ChIP-Seq(GSE27824)/Homer	FOXA1	luminal_specific	82	0.6434
	Foxa3(Forkhead)/Liver-Foxa3-ChIP-Seq(GSE77670)/Homer	Foxa3	luminal_specific	82	0.2868
	GRHL2(CP2)/HBE-GRHL2-ChIP-Seq(GSE46194)/Homer	GRHL2	luminal_specific	79	0.2565
	Fox:Ebox(Forkhead,bHLH)/Panc1-Foxa2-ChIP-Seq(GSE47459)/Homer	Fox:Ebox	luminal_specific	79	0.5159
	p63(p53)/Keratinocyte-p63-ChIP-Seq(GSE17611)/Homer	p63	luminal_specific	61	0.1932
	BORIS(Zf)/K562-CTCFL-ChIP-Seq(GSE32465)/Homer	BORIS	luminal_specific	60	0.1099
	Foxo3(Forkhead)/U2OS-Foxo3-ChIP-Seq(E-MTAB-2701)/Homer	Foxo3	luminal_specific	57	0.4538
	FoxL2(Forkhead)/Ovary-FoxL2-ChIP-Seq(GSE60858)/Homer	FoxL2	luminal_specific	57	0.502
	FOXK2(Forkhead)/U2OS-FOXK2-ChIP-Seq(E-MTAB-2204)/Homer	FOXK2	luminal_specific	54	0.3864
	Foxf1(Forkhead)/Lung-Foxf1-ChIP-Seq(GSE77951)/Homer	Foxf1	luminal_specific	51	0.5241
	p53(p53)/Saos-p53-ChIP-Seq(GSE15780)/Homer	p53	luminal_specific	50	0.0821
	p53(p53)/Saos-p53-ChIP-Seq/Homer	p53	luminal_specific	50	0.0821
	Bach2(bZIP)/OCILy7-Bach2-ChIP-Seq(GSE44420)/Homer	Bach2	luminal_specific	50	0.1315
	FOXK1(Forkhead)/HEK293-FOXK1-ChIP-Seq(GSE51673)/Homer	FOXK1	luminal_specific	48	0.5437
	FOXP1(Forkhead)/H9-FOXP1-ChIP-Seq(GSE31006)/Homer	FOXP1	luminal_specific	45	0.2921
	FoxD3(forkhead)/ZebrafishEmbryo-Foxd3.biotin-ChIP-seq(GSE106676)/Homer	FoxD3	luminal_specific	44	0.4673
	ETV1(ETS)/GIST48-ETV1-ChIP-Seq(GSE22441)/Homer	ETV1	luminal_specific	43	0.4841
	ELF5(ETS)/T47D-ELF5-ChIP-Seq(GSE30407)/Homer	ELF5	luminal_specific	42	0.3529
	EHF(ETS)/LoVo-EHF-ChIP-Seq(GSE49402)/Homer	EHF	luminal_specific	42	0.5261
	ELF3(ETS)/PDAC-ELF3-ChIP-Seq(GSE64557)/Homer	ELF3	luminal_specific	41	0.3591
	Elf4(ETS)/BMDM-Elf4-ChIP-Seq(GSE88699)/Homer	Elf4	luminal_specific	40	0.4036
	ETS1(ETS)/Jurkat-ETS1-ChIP-Seq(GSE17954)/Homer	ETS1	luminal_specific	38	0.4073
	Etv2(ETS)/ES-ER71-ChIP-Seq(GSE59402)/Homer	Etv2	luminal_specific	38	0.3873
	ERG(ETS)/VCaP-ERG-ChIP-Seq(GSE14097)/Homer	ERG	luminal_specific	37	0.5592
	Fli1(ETS)/CD8-FLI-ChIP-Seq(GSE20898)/Homer	Fli1	luminal_specific	33	0.3909
	p73(p53)/Trachea-p73-ChIP-Seq(PRJNA310161)/Homer	p73	luminal_specific	33	0.0437
	Foxo1(Forkhead)/RAW-Foxo1-ChIP-Seq(Fan_et_al.)/Homer	Foxo1	luminal_specific	32	0.6667
	GABPA(ETS)/Jurkat-GABPa-ChIP-Seq(GSE17954)/Homer	GABPA	luminal_specific	31	0.3309
	Gata4(Zf)/Heart-Gata4-ChIP-Seq(GSE35151)/Homer	Gata4	luminal_specific	30	0.4759
	PPARa(NR),DR1/Liver-Ppara-ChIP-Seq(GSE47954)/Homer	PPARa	luminal_specific	28	0.4052
	SPDEF(ETS)/VCaP-SPDEF-ChIP-Seq(SRA014231)/Homer	SPDEF	luminal_specific	28	0.3897
	Gata6(Zf)/HUG1N-GATA6-ChIP-Seq(GSE51936)/Homer	Gata6	luminal_specific	28	0.4481
	EWS:ERG-fusion(ETS)/CADO_ES1-EWS:ERG-ChIP-Seq(SRA014231)/Homer	EWS:ERG-fusion	luminal_specific	27	0.3501
	EWS:FLI1-fusion(ETS)/SK_N_MC-EWS:FLI1-ChIP-Seq(SRA014231)/Homer	EWS:FLI1-fusion	luminal_specific	26	0.2402
	ETV4(ETS)/HepG2-ETV4-ChIP-Seq(ENCODE)/Homer	ETV4	luminal_specific	26	0.3558
	GATA(Zf),IR4/iTreg-Gata3-ChIP-Seq(GSE20898)/Homer	GATA	luminal_specific	26	0.078
	Gata2(Zf)/K562-GATA2-ChIP-Seq(GSE18829)/Homer	Gata2	luminal_specific	26	0.3346
	Gata1(Zf)/K562-GATA1-ChIP-Seq(GSE18829)/Homer	Gata1	luminal_specific	22	0.2974
	Bach1(bZIP)/K562-Bach1-ChIP-Seq(GSE31477)/Homer	Bach1	luminal_specific	22	0.0449
	RARa(NR)/K562-RARa-ChIP-Seq(Encode)/Homer	RARa	luminal_specific	22	0.7537
	PPARE(NR),DR1/3T3L1-Pparg-ChIP-Seq(GSE13511)/Homer	PPARE	luminal_specific	21	0.3513
	TRPS1(Zf)/MCF7-TRPS1-ChIP-Seq(GSE107013)/Homer	TRPS1	luminal_specific	21	0.7226
	RXR(NR),DR1/3T3L1-RXR-ChIP-Seq(GSE13511)/Homer	RXR	luminal_specific	20	0.3852
	GATA3(Zf)/iTreg-Gata3-ChIP-Seq(GSE20898)/Homer	GATA3	luminal_specific	20	0.6025
	Ets1-distal(ETS)/CD4+-PolII-ChIP-Seq(Barski_et_al.)/Homer	Ets1-distal	luminal_specific	20	0.1499
	COUP-TFII(NR)/Artia-Nr2f2-ChIP-Seq(GSE46497)/Homer	COUP-TFII	luminal_specific	20	0.5004
	Elk1(ETS)/Hela-Elk1-ChIP-Seq(GSE31477)/Homer	Elk1	luminal_specific	20	0.174
	ELF1(ETS)/Jurkat-ELF1-ChIP-Seq(SRA014231)/Homer	ELF1	luminal_specific	20	0.163
	COUP-TFII(NR)/K562-NR2F1-ChIP-Seq(Encode)/Homer	COUP-TFII	luminal_specific	20	0.4489
	Hoxd13(Homeobox)/ChickenMSG-Hoxd13.Flag-ChIP-Seq(GSE86088)/Homer	Hoxd13	luminal_specific	19	0.6683
	NF-E2(bZIP)/K562-NFE2-ChIP-Seq(GSE31477)/Homer	NF-E2	luminal_specific	19	0.0417
	Hoxc9(Homeobox)/Ainv15-Hoxc9-ChIP-Seq(GSE21812)/Homer	Hoxc9	luminal_specific	19	0.2913
	PBX2(Homeobox)/K562-PBX2-ChIP-Seq(Encode)/Homer	PBX2	luminal_specific	19	0.4056
	NFE2L2(bZIP)/HepG2-NFE2L2-ChIP-Seq(Encode)/Homer	NFE2L2	luminal_specific	19	0.0449
	GATA(Zf),IR3/iTreg-Gata3-ChIP-Seq(GSE20898)/Homer	GATA	luminal_specific	18	0.1025
	TEAD3(TEA)/HepG2-TEAD3-ChIP-Seq(Encode)/Homer	TEAD3	luminal_specific	17	0.4563
	KLF5(Zf)/LoVo-KLF5-ChIP-Seq(GSE49402)/Homer	KLF5	luminal_specific	17	0.2941
	EAR2(NR)/K562-NR2F6-ChIP-Seq(Encode)/Homer	EAR2	luminal_specific	17	0.4118
	Erra(NR)/HepG2-Erra-ChIP-Seq(GSE31477)/Homer	Erra	luminal_specific	17	0.5739
	HOXB13(Homeobox)/ProstateTumor-HOXB13-ChIP-Seq(GSE56288)/Homer	HOXB13	luminal_specific	16	0.4988
	ETS(ETS)/Promoter/Homer	ETS	luminal_specific	16	0.1123
	Hoxa11(Homeobox)/ChickenMSG-Hoxa11.Flag-ChIP-Seq(GSE86088)/Homer	Hoxa11	luminal_specific	16	0.7896
	THRb(NR)/Liver-NR1A2-ChIP-Seq(GSE52613)/Homer	THRb	luminal_specific	16	0.8378
	MafA(bZIP)/Islet-MafA-ChIP-Seq(GSE30298)/Homer	MafA	luminal_specific	15	0.2831
	CEBP(bZIP)/ThioMac-CEBPb-ChIP-Seq(GSE21512)/Homer	CEBP	luminal_specific	15	0.326
	Nrf2(bZIP)/Lymphoblast-Nrf2-ChIP-Seq(GSE37589)/Homer	Nrf2	luminal_specific	15	0.0323
	CDX4(Homeobox)/ZebrafishEmbryos-Cdx4.Myc-ChIP-Seq(GSE48254)/Homer	CDX4	luminal_specific	14	0.4391
	TEAD(TEA)/Fibroblast-PU.1-ChIP-Seq(Unpublished)/Homer	TEAD	luminal_specific	14	0.3113
	Elk4(ETS)/Hela-Elk4-ChIP-Seq(GSE31477)/Homer	Elk4	luminal_specific	14	0.1634
	MafK(bZIP)/C2C12-MafK-ChIP-Seq(GSE36030)/Homer	MafK	luminal_specific	14	0.0895
	Hoxd11(Homeobox)/ChickenMSG-Hoxd11.Flag-ChIP-Seq(GSE86088)/Homer	Hoxd11	luminal_specific	14	0.7868
	Six2(Homeobox)/NephronProgenitor-Six2-ChIP-Seq(GSE39837)/Homer	Six2	luminal_specific	14	0.4109
	TEAD1(TEAD)/HepG2-TEAD1-ChIP-Seq(Encode)/Homer	TEAD1	luminal_specific	14	0.3917
	PU.1(ETS)/ThioMac-PU.1-ChIP-Seq(GSE21512)/Homer	PU.1	luminal_specific	13	0.203
	IRF2(IRF)/Erythroblas-IRF2-ChIP-Seq(GSE36985)/Homer	IRF2	luminal_specific	13	0.0654
	NF1-halfsite(CTF)/LNCaP-NF1-ChIP-Seq(Unpublished)/Homer	NF1-halfsite	luminal_specific	13	0.5298
	CEBP:AP1(bZIP)/ThioMac-CEBPb-ChIP-Seq(GSE21512)/Homer	CEBP:AP1	luminal_specific	12	0.3435
	Hoxa9(Homeobox)/ChickenMSG-Hoxa9.Flag-ChIP-Seq(GSE86088)/Homer	Hoxa9	luminal_specific	12	0.8064
	Hoxa13(Homeobox)/ChickenMSG-Hoxa13.Flag-ChIP-Seq(GSE86088)/Homer	Hoxa13	luminal_specific	12	0.8076
	Pdx1(Homeobox)/Islet-Pdx1-ChIP-Seq(SRA008281)/Homer	Pdx1	luminal_specific	12	0.4424
	PR(NR)/T47D-PR-ChIP-Seq(GSE31130)/Homer	PR	luminal_specific	12	0.6409
	KLF6(Zf)/PDAC-KLF6-ChIP-Seq(GSE64557)/Homer	KLF6	luminal_specific	12	0.2406
	MafB(bZIP)/BMM-Mafb-ChIP-Seq(GSE75722)/Homer	MafB	luminal_specific	11	0.1708
	HLF(bZIP)/HSC-HLF.Flag-ChIP-Seq(GSE69817)/Homer	HLF	luminal_specific	11	0.3922
	Hoxd10(Homeobox)/ChickenMSG-Hoxd10.Flag-ChIP-Seq(GSE86088)/Homer	Hoxd10	luminal_specific	11	0.4992
	IRF1(IRF)/PBMC-IRF1-ChIP-Seq(GSE43036)/Homer	IRF1	luminal_specific	11	0.0866
	Lhx3(Homeobox)/Neuron-Lhx3-ChIP-Seq(GSE31456)/Homer	Lhx3	luminal_specific	11	0.6491
	HIC1(Zf)/Treg-ZBTB29-ChIP-Seq(GSE99889)/Homer	HIC1	luminal_specific	11	0.5319
	TEAD4(TEA)/Tropoblast-Tead4-ChIP-Seq(GSE37350)/Homer	TEAD4	luminal_specific	11	0.3235
	SCL(bHLH)/HPC7-Scl-ChIP-Seq(GSE13511)/Homer	SCL	luminal_specific	11	0.8623
	Sox6(HMG)/Myotubes-Sox6-ChIP-Seq(GSE32627)/Homer	Sox6	luminal_specific	11	0.5658
	IRF8(IRF)/BMDM-IRF8-ChIP-Seq(GSE77884)/Homer	IRF8	luminal_specific	11	0.1601
	NFIL3(bZIP)/HepG2-NFIL3-ChIP-Seq(Encode)/Homer	NFIL3	luminal_specific	10	0.308
	Isl1(Homeobox)/Neuron-Isl1-ChIP-Seq(GSE31456)/Homer	Isl1	luminal_specific	10	0.6601
	Unknown(Homeobox)/Limb-p300-ChIP-Seq/Homer	Unknown	luminal_specific	10	0.3305
	Sox3(HMG)/NPC-Sox3-ChIP-Seq(GSE33059)/Homer	Sox3	luminal_specific	10	0.5817
	AR-halfsite(NR)/LNCaP-AR-ChIP-Seq(GSE27824)/Homer	AR-halfsite	luminal_specific	9	0.8072
	IRF3(IRF)/BMDM-Irf3-ChIP-Seq(GSE67343)/Homer	IRF3	luminal_specific	9	0.1797
	Tbx5(T-box)/HL1-Tbx5.biotin-ChIP-Seq(GSE21529)/Homer	Tbx5	luminal_specific	9	0.7561
	Oct4(POU,Homeobox)/mES-Oct4-ChIP-Seq(GSE11431)/Homer	2020-10-04	luminal_specific	9	0.25
	Cdx2(Homeobox)/mES-Cdx2-ChIP-Seq(GSE14586)/Homer	Cdx2	luminal_specific	9	0.3632
	KLF14(Zf)/HEK293-KLF14.GFP-ChIP-Seq(GSE58341)/Homer	KLF14	luminal_specific	9	0.3386
	Sox15(HMG)/CPA-Sox15-ChIP-Seq(GSE62909)/Homer	Sox15	luminal_specific	9	0.4126
	LEF1(HMG)/H1-LEF1-ChIP-Seq(GSE64758)/Homer	LEF1	luminal_specific	9	0.3113
	PRDM1(Zf)/Hela-PRDM1-ChIP-Seq(GSE31477)/Homer	PRDM1	luminal_specific	8	0.259
	IRF4(IRF)/GM12878-IRF4-ChIP-Seq(GSE32465)/Homer	IRF4	luminal_specific	8	0.2002
	RUNX2(Runt)/PCa-RUNX2-ChIP-Seq(GSE33889)/Homer	RUNX2	luminal_specific	8	0.3047
	Atf4(bZIP)/MEF-Atf4-ChIP-Seq(GSE35681)/Homer	Atf4	luminal_specific	8	0.1426
	Nkx6.1(Homeobox)/Islet-Nkx6.1-ChIP-Seq(GSE40975)/Homer	Nkx6.1	luminal_specific	8	0.7994
	Klf4(Zf)/mES-Klf4-ChIP-Seq(GSE11431)/Homer	Klf4	luminal_specific	8	0.0976
	Rfx6(HTH)/Min6b1-Rfx6.HA-ChIP-Seq(GSE62844)/Homer	Rfx6	luminal_specific	8	0.3358
	Sp2(Zf)/HEK293-Sp2.eGFP-ChIP-Seq(Encode)/Homer	Sp2	luminal_specific	8	0.3056
	TEAD2(TEA)/Py2T-Tead2-ChIP-Seq(GSE55709)/Homer	TEAD2	luminal_specific	8	0.2145
	Sox2(HMG)/mES-Sox2-ChIP-Seq(GSE11431)/Homer	Sox2	luminal_specific	8	0.3403
	Chop(bZIP)/MEF-Chop-ChIP-Seq(GSE35681)/Homer	Chop	luminal_specific	8	0.1156
	Hoxd12(Homeobox)/ChickenMSG-Hoxd12.Flag-ChIP-Seq(GSE86088)/Homer	Hoxd12	luminal_specific	8	0.6724
	Foxh1(Forkhead)/hESC-FOXH1-ChIP-Seq(GSE29422)/Homer	Foxh1	luminal_specific	8	0.2749
	PU.1-IRF(ETS:IRF)/Bcell-PU.1-ChIP-Seq(GSE21512)/Homer	PU.1-IRF	luminal_specific	8	0.4681
	NF1(CTF)/LNCAP-NF1-ChIP-Seq(Unpublished)/Homer	NF1	luminal_specific	8	0.1287
	Sox4(HMG)/proB-Sox4-ChIP-Seq(GSE50066)/Homer	Sox4	luminal_specific	8	0.317
	PSE(SNAPc)/K562-mStart-Seq/Homer	PSE	luminal_specific	8	0.2504
	Tgif2(Homeobox)/mES-Tgif2-ChIP-Seq(GSE55404)/Homer	Tgif2	luminal_specific	8	0.8096
	EKLF(Zf)/Erythrocyte-Klf1-ChIP-Seq(GSE20478)/Homer	EKLF	luminal_specific	7	0.0682
	BMYB(HTH)/Hela-BMYB-ChIP-Seq(GSE27030)/Homer	BMYB	luminal_specific	7	0.5012
	Zic(Zf)/Cerebellum-ZIC1.2-ChIP-Seq(GSE60731)/Homer	Zic	luminal_specific	7	0.2549
	Nkx3.1(Homeobox)/LNCaP-Nkx3.1-ChIP-Seq(GSE28264)/Homer	Nkx3.1	luminal_specific	7	0.665
	Meis1(Homeobox)/MastCells-Meis1-ChIP-Seq(GSE48085)/Homer	Meis1	luminal_specific	7	0.4877
	Bcl11a(Zf)/HSPC-BCL11A-ChIP-Seq(GSE104676)/Homer	Bcl11a	luminal_specific	7	0.2443
	Sox9(HMG)/Limb-SOX9-ChIP-Seq(GSE73225)/Homer	Sox9	luminal_specific	7	0.3158
	Pitx1(Homeobox)/Chicken-Pitx1-ChIP-Seq(GSE38910)/Homer	Pitx1	luminal_specific	7	0.9105
	Sp5(Zf)/mES-Sp5.Flag-ChIP-Seq(GSE72989)/Homer	Sp5	luminal_specific	7	0.1977
	Sox10(HMG)/SciaticNerve-Sox3-ChIP-Seq(GSE35132)/Homer	Sox10	luminal_specific	7	0.529
	RUNX(Runt)/HPC7-Runx1-ChIP-Seq(GSE22178)/Homer	RUNX	luminal_specific	7	0.2557
	TATA-Box(TBP)/Promoter/Homer	TATA-Box	luminal_specific	7	0.5114
	MYB(HTH)/ERMYB-Myb-ChIPSeq(GSE22095)/Homer	MYB	luminal_specific	7	0.5408
	Hoxb4(Homeobox)/ES-Hoxb4-ChIP-Seq(GSE34014)/Homer	Hoxb4	luminal_specific	7	0.1017
	Unknown-ESC-element(?)/mES-Nanog-ChIP-Seq(GSE11724)/Homer	Unknown-ESC-element	luminal_specific	7	0.1912
	RUNX1(Runt)/Jurkat-RUNX1-ChIP-Seq(GSE29180)/Homer	RUNX1	luminal_specific	7	0.3595
	ZNF7(Zf)/HepG2-ZNF7.Flag-ChIP-Seq(Encode)/Homer	ZNF7	luminal_specific	7	0.2426
	LXH9(Homeobox)/Hct116-LXH9.V5-ChIP-Seq(GSE116822)/Homer	LXH9	luminal_specific	7	0.5609
	Lhx1(Homeobox)/EmbryoCarcinoma-Lhx1-ChIP-Seq(GSE70957)/Homer	Lhx1	luminal_specific	7	0.5029
	TR4(NR),DR1/Hela-TR4-ChIP-Seq(GSE24685)/Homer	TR4	luminal_specific	7	0.0466
	MITF(bHLH)/MastCells-MITF-ChIP-Seq(GSE48085)/Homer	MITF	luminal_specific	7	0.2749
	KLF10(Zf)/HEK293-KLF10.GFP-ChIP-Seq(GSE58341)/Homer	KLF10	luminal_specific	7	0.1467
	PAX5(Paired,Homeobox)/GM12878-PAX5-ChIP-Seq(GSE32465)/Homer	PAX5	luminal_specific	7	0.114
	SpiB(ETS)/OCILY3-SPIB-ChIP-Seq(GSE56857)/Homer	SpiB	luminal_specific	6	0.1078
	ISRE(IRF)/ThioMac-LPS-Expression(GSE23622)/Homer	ISRE	luminal_specific	6	0.0384
	RUNX-AML(Runt)/CD4+-PolII-ChIP-Seq(Barski_et_al.)/Homer	RUNX-AML	luminal_specific	6	0.2643
	Six1(Homeobox)/Myoblast-Six1-ChIP-Chip(GSE20150)/Homer	Six1	luminal_specific	6	0.1181
	CRX(Homeobox)/Retina-Crx-ChIP-Seq(GSE20012)/Homer	CRX	luminal_specific	6	0.6949
	AMYB(HTH)/Testes-AMYB-ChIP-Seq(GSE44588)/Homer	AMYB	luminal_specific	6	0.4877
	Tlx?(NR)/NPC-H3K4me1-ChIP-Seq(GSE16256)/Homer	Tlx?	luminal_specific	6	0.1364
	Nur77(NR)/K562-NR4A1-ChIP-Seq(GSE31363)/Homer	Nur77	luminal_specific	6	0.098
	bZIP:IRF(bZIP,IRF)/Th17-BatF-ChIP-Seq(GSE39756)/Homer	bZIP:IRF	luminal_specific	6	0.2165
	Hnf6b(Homeobox)/LNCaP-Hnf6b-ChIP-Seq(GSE106305)/Homer	Hnf6b	luminal_specific	6	0.3893
	Pit1(Homeobox)/GCrat-Pit1-ChIP-Seq(GSE58009)/Homer	Pit1	luminal_specific	6	0.4563
	WT1(Zf)/Kidney-WT1-ChIP-Seq(GSE90016)/Homer	WT1	luminal_specific	6	0.1532
	GATA3(Zf),DR4/iTreg-Gata3-ChIP-Seq(GSE20898)/Homer	GATA3	luminal_specific	5	0.0535
	KLF3(Zf)/MEF-Klf3-ChIP-Seq(GSE44748)/Homer	KLF3	luminal_specific	5	0.0976
	Tgif1(Homeobox)/mES-Tgif1-ChIP-Seq(GSE55404)/Homer	Tgif1	luminal_specific	5	0.7819
	Rfx5(HTH)/GM12878-Rfx5-ChIP-Seq(GSE31477)/Homer	Rfx5	luminal_specific	5	0.1127
	Maz(Zf)/HepG2-Maz-ChIP-Seq(GSE31477)/Homer	Maz	luminal_specific	5	0.2545
	Bapx1(Homeobox)/VertebralCol-Bapx1-ChIP-Seq(GSE36672)/Homer	Bapx1	luminal_specific	5	0.6009
	GATA3(Zf),DR8/iTreg-Gata3-ChIP-Seq(GSE20898)/Homer	GATA3	luminal_specific	5	0.0441
	Rfx2(HTH)/LoVo-RFX2-ChIP-Seq(GSE49402)/Homer	Rfx2	luminal_specific	5	0.0343
	Atf1(bZIP)/K562-ATF1-ChIP-Seq(GSE31477)/Homer	Atf1	luminal_specific	5	0.2214
	Pit1+1bp(Homeobox)/GCrat-Pit1-ChIP-Seq(GSE58009)/Homer	Pit1+1bp	luminal_specific	5	0.2141
	NF1:FOXA1(CTF,Forkhead)/LNCAP-FOXA1-ChIP-Seq(GSE27824)/Homer	NF1:FOXA1	luminal_specific	5	0.0355
	Pax8(Paired,Homeobox)/Thyroid-Pax8-ChIP-Seq(GSE26938)/Homer	Pax8	luminal_specific	5	0.098
	Six4(Homeobox)/MCF7-SIX4-ChIP-Seq(Encode)/Homer	Six4	luminal_specific	5	0.0306
	BMAL1(bHLH)/Liver-Bmal1-ChIP-Seq(GSE39860)/Homer	BMAL1	luminal_specific	5	0.4743
	Ap4(bHLH)/AML-Tfap4-ChIP-Seq(GSE45738)/Homer	Ap4	luminal_specific	5	0.3529
	Eomes(T-box)/H9-Eomes-ChIP-Seq(GSE26097)/Homer	Eomes	luminal_specific	5	0.6667
	SCRT1(Zf)/HEK293-SCRT1.eGFP-ChIP-Seq(Encode)/Homer	SCRT1	luminal_specific	5	0.1168
	Arnt:Ahr(bHLH)/MCF7-Arnt-ChIP-Seq(Lo_et_al.)/Homer	Arnt:Ahr	luminal_specific	5	0.1667
	GLIS3(Zf)/Thyroid-Glis3.GFP-ChIP-Seq(GSE103297)/Homer	GLIS3	luminal_specific	5	0.3219
	Nanog(Homeobox)/mES-Nanog-ChIP-Seq(GSE11724)/Homer	Nanog	luminal_specific	5	0.8991
	HIF-1b(HLH)/T47D-HIF1b-ChIP-Seq(GSE59937)/Homer	HIF-1b	luminal_specific	5	0.2733
	ZNF189(Zf)/HEK293-ZNF189.GFP-ChIP-Seq(GSE58341)/Homer	ZNF189	luminal_specific	4	0.2704
	Nkx2.5(Homeobox)/HL1-Nkx2.5.biotin-ChIP-Seq(GSE21529)/Homer	Nkx2.5	luminal_specific	4	0.6168
	ZEB1(Zf)/PDAC-ZEB1-ChIP-Seq(GSE64557)/Homer	ZEB1	luminal_specific	4	0.491
	RFX(HTH)/K562-RFX3-ChIP-Seq(SRA012198)/Homer	RFX	luminal_specific	4	0.0282
	Olig2(bHLH)/Neuron-Olig2-ChIP-Seq(GSE30882)/Homer	Olig2	luminal_specific	4	0.5662
	STAT4(Stat)/CD4-Stat4-ChIP-Seq(GSE22104)/Homer	STAT4	luminal_specific	4	0.3828
	Atf7(bZIP)/3T3L1-Atf7-ChIP-Seq(GSE56872)/Homer	Atf7	luminal_specific	4	0.1454
	PGR(NR)/EndoStromal-PGR-ChIP-Seq(GSE69539)/Homer	PGR	luminal_specific	4	0.1074
	Lhx2(Homeobox)/HFSC-Lhx2-ChIP-Seq(GSE48068)/Homer	Lhx2	luminal_specific	4	0.4632
	Oct11(POU,Homeobox)/NCIH1048-POU2F3-ChIP-seq(GSE115123)/Homer	2020-10-11	luminal_specific	4	0.1667
	c-Jun-CRE(bZIP)/K562-cJun-ChIP-Seq(GSE31477)/Homer	c-Jun-CRE	luminal_specific	4	0.0984
	p53(p53)/mES-cMyc-ChIP-Seq(GSE11431)/Homer	p53	luminal_specific	4	0.0086
	Smad3(MAD)/NPC-Smad3-ChIP-Seq(GSE36673)/Homer	Smad3	luminal_specific	4	0.6724
	Bcl6(Zf)/Liver-Bcl6-ChIP-Seq(GSE31578)/Homer	Bcl6	luminal_specific	4	0.4759
	MafF(bZIP)/HepG2-MafF-ChIP-Seq(GSE31477)/Homer	MafF	luminal_specific	4	0.1475
	HNF6(Homeobox)/Liver-Hnf6-ChIP-Seq(ERP000394)/Homer	HNF6	luminal_specific	4	0.2443
	Nkx2.1(Homeobox)/LungAC-Nkx2.1-ChIP-Seq(GSE43252)/Homer	Nkx2.1	luminal_specific	4	0.7112
	NPAS2(bHLH)/Liver-NPAS2-ChIP-Seq(GSE39860)/Homer	NPAS2	luminal_specific	4	0.2962
	ERRg(NR)/Kidney-ESRRG-ChIP-Seq(GSE104905)/Homer	ERRg	luminal_specific	4	0.2541
	Oct2(POU,Homeobox)/Bcell-Oct2-ChIP-Seq(GSE21512)/Homer	2020-10-02	luminal_specific	4	0.1581
	NPAS(bHLH)/Liver-NPAS-ChIP-Seq(GSE39860)/Homer	NPAS	luminal_specific	4	0.4248
	RORgt(NR)/EL4-RORgt.Flag-ChIP-Seq(GSE56019)/Homer	RORgt	luminal_specific	4	0.058
	RORgt(NR)/EL4-RORgt.Flag-ChIP-Seq(GSE56019)/Homer	RORgt	luminal_specific	4	0.058
	IRF:BATF(IRF:bZIP)/pDC-Irf8-ChIP-Seq(GSE66899)/Homer	IRF:BATF	luminal_specific	4	0.0703
	HOXA1(Homeobox)/mES-Hoxa1-ChIP-Seq(SRP084292)/Homer	HOXA1	luminal_specific	3	0.1213
	ZNF416(Zf)/HEK293-ZNF416.GFP-ChIP-Seq(GSE58341)/Homer	ZNF416	luminal_specific	3	0.3681
	Esrrb(NR)/mES-Esrrb-ChIP-Seq(GSE11431)/Homer	Esrrb	luminal_specific	3	0.2108
	Znf263(Zf)/K562-Znf263-ChIP-Seq(GSE31477)/Homer	Znf263	luminal_specific	3	0.4334
	THRb(NR)/HepG2-THRb.Flag-ChIP-Seq(Encode)/Homer	THRb	luminal_specific	3	0.1589
	HNF4a(NR),DR1/HepG2-HNF4a-ChIP-Seq(GSE25021)/Homer	HNF4a	luminal_specific	3	0.163
	GSC(Homeobox)/FrogEmbryos-GSC-ChIP-Seq(DRA000576)/Homer	GSC	luminal_specific	3	0.4281
	Gfi1b(Zf)/HPC7-Gfi1b-ChIP-Seq(GSE22178)/Homer	Gfi1b	luminal_specific	3	0.2373
	Hoxa10(Homeobox)/ChickenMSG-Hoxa10.Flag-ChIP-Seq(GSE86088)/Homer	Hoxa10	luminal_specific	3	0.2766
	PU.1:IRF8(ETS:IRF)/pDC-Irf8-ChIP-Seq(GSE66899)/Homer	PU.1:IRF8	luminal_specific	3	0.0878
	Zac1(Zf)/Neuro2A-Plagl1-ChIP-Seq(GSE75942)/Homer	Zac1	luminal_specific	3	0.5858
	Dlx3(Homeobox)/Kerainocytes-Dlx3-ChIP-Seq(GSE89884)/Homer	Dlx3	luminal_specific	3	0.3399
	Rbpj1(?)/Panc1-Rbpj1-ChIP-Seq(GSE47459)/Homer	Rbpj1	luminal_specific	3	0.4547
	Klf9(Zf)/GBM-Klf9-ChIP-Seq(GSE62211)/Homer	Klf9	luminal_specific	3	0.0735
	Nkx2.2(Homeobox)/NPC-Nkx2.2-ChIP-Seq(GSE61673)/Homer	Nkx2.2	luminal_specific	3	0.5413
	Ptf1a(bHLH)/Panc1-Ptf1a-ChIP-Seq(GSE47459)/Homer	Ptf1a	luminal_specific	3	0.6107
	Egr1(Zf)/K562-Egr1-ChIP-Seq(GSE32465)/Homer	Egr1	luminal_specific	3	0.1438
	RORa(NR)/Liver-Rora-ChIP-Seq(GSE101115)/Homer	RORa	luminal_specific	3	0.0629
	OCT:OCT-short(POU,Homeobox)/NPC-OCT6-ChIP-Seq(GSE43916)/Homer	OCT:OCT-short	luminal_specific	3	0.3464
	X-box(HTH)/NPC-H3K4me1-ChIP-Seq(GSE16256)/Homer	X-box	luminal_specific	3	0.0429
	FOXA1:AR(Forkhead,NR)/LNCAP-AR-ChIP-Seq(GSE27824)/Homer	FOXA1:AR	luminal_specific	3	0.04
	Tcfcp2l1(CP2)/mES-Tcfcp2l1-ChIP-Seq(GSE11431)/Homer	Tcfcp2l1	luminal_specific	3	0.0458
	Tcf12(bHLH)/GM12878-Tcf12-ChIP-Seq(GSE32465)/Homer	Tcf12	luminal_specific	3	0.2676
	ARE(NR)/LNCAP-AR-ChIP-Seq(GSE27824)/Homer	ARE	luminal_specific	3	0.0809
	Prop1(Homeobox)/GHFT1-PROP1.biotin-ChIP-Seq(GSE77302)/Homer	Prop1	luminal_specific	3	0.3346
	Rfx1(HTH)/NPC-H3K4me1-ChIP-Seq(GSE16256)/Homer	Rfx1	luminal_specific	3	0.0662
	PRDM15(Zf)/ESC-Prdm15-ChIP-Seq(GSE73694)/Homer	PRDM15	luminal_specific	3	0.3325
	ZNF669(Zf)/HEK293-ZNF669.GFP-ChIP-Seq(GSE58341)/Homer	ZNF669	luminal_specific	3	0.0233
	Mef2b(MADS)/HEK293-Mef2b.V5-ChIP-Seq(GSE67450)/Homer	Mef2b	luminal_specific	3	0.364
	PRDM14(Zf)/H1-PRDM14-ChIP-Seq(GSE22767)/Homer	PRDM14	luminal_specific	3	0.1091
	Zfp57(Zf)/H1-ZFP57.HA-ChIP-Seq(GSE115387)/Homer	Zfp57	luminal_specific	3	0.0609
	Atoh1(bHLH)/Cerebellum-Atoh1-ChIP-Seq(GSE22111)/Homer	Atoh1	luminal_specific	3	0.3219
	DMRT1(DM)/Testis-DMRT1-ChIP-Seq(GSE64892)/Homer	DMRT1	luminal_specific	3	0.116
	Barx1(Homeobox)/Stomach-Barx1.3xFlag-ChIP-Seq(GSE69483)/Homer	Barx1	luminal_specific	2	0.2512
	Phox2a(Homeobox)/Neuron-Phox2a-ChIP-Seq(GSE31456)/Homer	Phox2a	luminal_specific	2	0.2267
	Stat3(Stat)/mES-Stat3-ChIP-Seq(GSE11431)/Homer	Stat3	luminal_specific	2	0.172
	Zic3(Zf)/mES-Zic3-ChIP-Seq(GSE37889)/Homer	Zic3	luminal_specific	2	0.156
	ZEB2(Zf)/SNU398-ZEB2-ChIP-Seq(GSE103048)/Homer	ZEB2	luminal_specific	2	0.2835
	ZNF415(Zf)/HEK293-ZNF415.GFP-ChIP-Seq(GSE58341)/Homer	ZNF415	luminal_specific	2	0.1434
	GRE(NR),IR3/RAW264.7-GRE-ChIP-Seq(Unpublished)/Homer	GRE	luminal_specific	2	0.0829
	NFY(CCAAT)/Promoter/Homer	NFY	luminal_specific	2	0.2455
	GATA:SCL(Zf,bHLH)/Ter119-SCL-ChIP-Seq(GSE18720)/Homer	GATA:SCL	luminal_specific	2	0.0462
	Gli2(Zf)/GM2-Gli2-ChIP-Chip(GSE112702)/Homer	Gli2	luminal_specific	2	0.0756
	NeuroG2(bHLH)/Fibroblast-NeuroG2-ChIP-Seq(GSE75910)/Homer	NeuroG2	luminal_specific	2	0.4493
	Smad4(MAD)/ESC-SMAD4-ChIP-Seq(GSE29422)/Homer	Smad4	luminal_specific	2	0.3864
	Tcf21(bHLH)/ArterySmoothMuscle-Tcf21-ChIP-Seq(GSE61369)/Homer	Tcf21	luminal_specific	2	0.2766
	E2A(bHLH),near_PU.1/Bcell-PU.1-ChIP-Seq(GSE21512)/Homer	E2A	luminal_specific	2	0.3905
	Ascl1(bHLH)/NeuralTubes-Ascl1-ChIP-Seq(GSE55840)/Homer	Ascl1	luminal_specific	2	0.402
	Sox17(HMG)/Endoderm-Sox17-ChIP-Seq(GSE61475)/Homer	Sox17	luminal_specific	2	0.2696
	Sp1(Zf)/Promoter/Homer	Sp1	luminal_specific	2	0.0286
	DMRT6(DM)/Testis-DMRT6-ChIP-Seq(GSE60440)/Homer	DMRT6	luminal_specific	2	0.0882
	HEB(bHLH)/mES-Heb-ChIP-Seq(GSE53233)/Homer	HEB	luminal_specific	2	0.4624
	CHR(?)/Hela-CellCycle-Expression/Homer	CHR	luminal_specific	2	0.3092
	ZNF675(Zf)/HEK293-ZNF675.GFP-ChIP-Seq(GSE58341)/Homer	ZNF675	luminal_specific	2	0.0621
	ETS:E-box(ETS,bHLH)/HPC7-Scl-ChIP-Seq(GSE22178)/Homer	ETS:E-box	luminal_specific	2	0.0392
	CArG(MADS)/PUER-Srf-ChIP-Seq(Sullivan_et_al.)/Homer	CArG	luminal_specific	2	0.1234
	ERE(NR),IR3/MCF7-ERa-ChIP-Seq(Unpublished)/Homer	ERE	luminal_specific	2	0.0768
	Atf2(bZIP)/3T3L1-Atf2-ChIP-Seq(GSE56872)/Homer	Atf2	luminal_specific	2	0.094
	Mef2c(MADS)/GM12878-Mef2c-ChIP-Seq(GSE32465)/Homer	Mef2c	luminal_specific	2	0.219
	Cux2(Homeobox)/Liver-Cux2-ChIP-Seq(GSE35985)/Homer	Cux2	luminal_specific	2	0.1965
	STAT1(Stat)/HelaS3-STAT1-ChIP-Seq(GSE12782)/Homer	STAT1	luminal_specific	2	0.1336
	Mef2d(MADS)/Retina-Mef2d-ChIP-Seq(GSE61391)/Homer	Mef2d	luminal_specific	2	0.0984
	MyoG(bHLH)/C2C12-MyoG-ChIP-Seq(GSE36024)/Homer	MyoG	luminal_specific	2	0.2884
	Smad2(MAD)/ES-SMAD2-ChIP-Seq(GSE29422)/Homer	Smad2	luminal_specific	2	0.3828
	ZNF467(Zf)/HEK293-ZNF467.GFP-ChIP-Seq(GSE58341)/Homer	ZNF467	luminal_specific	2	0.2124
	Brachyury(T-box)/Mesoendoderm-Brachyury-ChIP-exo(GSE54963)/Homer	Brachyury	luminal_specific	2	0.1005
	Stat3+il21(Stat)/CD4-Stat3-ChIP-Seq(GSE19198)/Homer	Stat3+il21	luminal_specific	2	0.2439
	AP-2gamma(AP2)/MCF7-TFAP2C-ChIP-Seq(GSE21234)/Homer	AP-2gamma	luminal_specific	2	0.2426
	Pitx1:Ebox(Homeobox,bHLH)/Hindlimb-Pitx1-ChIP-Seq(GSE41591)/Homer	Pitx1:Ebox	luminal_specific	2	0.1005
	ZNF341(Zf)/EBV-ZNF341-ChIP-Seq(GSE113194)/Homer	ZNF341	luminal_specific	2	0.1887
	Tcf3(HMG)/mES-Tcf3-ChIP-Seq(GSE11724)/Homer	Tcf3	luminal_specific	2	0.1119
	CEBP:CEBP(bZIP)/MEF-Chop-ChIP-Seq(GSE35681)/Homer	CEBP:CEBP	luminal_specific	2	0.076
	GLI3(Zf)/Limb-GLI3-ChIP-Chip(GSE11077)/Homer	GLI3	luminal_specific	2	0.0359
	TCF4(bHLH)/SHSY5Y-TCF4-ChIP-Seq(GSE96915)/Homer	TCF4	luminal_specific	2	0.4306
	Otx2(Homeobox)/EpiLC-Otx2-ChIP-Seq(GSE56098)/Homer	Otx2	luminal_specific	2	0.2925
	Myf5(bHLH)/GM-Myf5-ChIP-Seq(GSE24852)/Homer	Myf5	luminal_specific	2	0.2047
	NeuroD1(bHLH)/Islet-NeuroD1-ChIP-Seq(GSE30298)/Homer	NeuroD1	luminal_specific	2	0.2467
	MYNN(Zf)/HEK293-MYNN.eGFP-ChIP-Seq(Encode)/Homer	MYNN	luminal_specific	2	0.1344
	Atf3(bZIP)/GBM-ATF3-ChIP-Seq(GSE33912)/Homer	Atf3	basal_specific	150	0.5193
	JunB(bZIP)/DendriticCells-Junb-ChIP-Seq(GSE36099)/Homer	JunB	basal_specific	148	0.4715
	Fra1(bZIP)/BT549-Fra1-ChIP-Seq(GSE46166)/Homer	Fra1	basal_specific	146	0.4745
	Fra2(bZIP)/Striatum-Fra2-ChIP-Seq(GSE43429)/Homer	Fra2	basal_specific	146	0.4344
	BATF(bZIP)/Th17-BATF-ChIP-Seq(GSE39756)/Homer	BATF	basal_specific	139	0.5031
	Fosl2(bZIP)/3T3L1-Fosl2-ChIP-Seq(GSE56872)/Homer	Fosl2	basal_specific	138	0.3495
	AP-1(bZIP)/ThioMac-PU.1-ChIP-Seq(GSE21512)/Homer	AP-1	basal_specific	134	0.5316
	Jun-AP1(bZIP)/K562-cJun-ChIP-Seq(GSE31477)/Homer	Jun-AP1	basal_specific	129	0.284
	Bach2(bZIP)/OCILy7-Bach2-ChIP-Seq(GSE44420)/Homer	Bach2	basal_specific	63	0.1937
	CTCF(Zf)/CD4+-CTCF-ChIP-Seq(Barski_et_al.)/Homer	CTCF	basal_specific	56	0.1443
	BORIS(Zf)/K562-CTCFL-ChIP-Seq(GSE32465)/Homer	BORIS	basal_specific	43	0.1728
	TEAD3(TEA)/HepG2-TEAD3-ChIP-Seq(Encode)/Homer	TEAD3	basal_specific	38	0.534
	TEAD1(TEAD)/HepG2-TEAD1-ChIP-Seq(Encode)/Homer	TEAD1	basal_specific	37	0.4884
	TEAD(TEA)/Fibroblast-PU.1-ChIP-Seq(Unpublished)/Homer	TEAD	basal_specific	37	0.3881
	TEAD4(TEA)/Tropoblast-Tead4-ChIP-Seq(GSE37350)/Homer	TEAD4	basal_specific	31	0.4259
	TEAD2(TEA)/Py2T-Tead2-ChIP-Seq(GSE55709)/Homer	TEAD2	basal_specific	30	0.2986
	AP-2gamma(AP2)/MCF7-TFAP2C-ChIP-Seq(GSE21234)/Homer	AP-2gamma	basal_specific	21	0.4606
	NF-E2(bZIP)/K562-NFE2-ChIP-Seq(GSE31477)/Homer	NF-E2	basal_specific	21	0.0579
	MafK(bZIP)/C2C12-MafK-ChIP-Seq(GSE36030)/Homer	MafK	basal_specific	21	0.1343
	Bach1(bZIP)/K562-Bach1-ChIP-Seq(GSE31477)/Homer	Bach1	basal_specific	21	0.0556
	AP-2alpha(AP2)/Hela-AP2alpha-ChIP-Seq(GSE31477)/Homer	AP-2alpha	basal_specific	20	0.3927
	Nrf2(bZIP)/Lymphoblast-Nrf2-ChIP-Seq(GSE37589)/Homer	Nrf2	basal_specific	18	0.0486
	KLF3(Zf)/MEF-Klf3-ChIP-Seq(GSE44748)/Homer	KLF3	basal_specific	15	0.2029
	p63(p53)/Keratinocyte-p63-ChIP-Seq(GSE17611)/Homer	p63	basal_specific	15	0.1705
	Klf4(Zf)/mES-Klf4-ChIP-Seq(GSE11431)/Homer	Klf4	basal_specific	14	0.179
	NFE2L2(bZIP)/HepG2-NFE2L2-ChIP-Seq(Encode)/Homer	NFE2L2	basal_specific	14	0.044
	KLF5(Zf)/LoVo-KLF5-ChIP-Seq(GSE49402)/Homer	KLF5	basal_specific	14	0.4321
	Atf7(bZIP)/3T3L1-Atf7-ChIP-Seq(GSE56872)/Homer	Atf7	basal_specific	13	0.1983
	Atf2(bZIP)/3T3L1-Atf2-ChIP-Seq(GSE56872)/Homer	Atf2	basal_specific	13	0.1512
	c-Jun-CRE(bZIP)/K562-cJun-ChIP-Seq(GSE31477)/Homer	c-Jun-CRE	basal_specific	12	0.1412
	MafB(bZIP)/BMM-Mafb-ChIP-Seq(GSE75722)/Homer	MafB	basal_specific	12	0.1906
	p53(p53)/Saos-p53-ChIP-Seq(GSE15780)/Homer	p53	basal_specific	11	0.0602
	p53(p53)/Saos-p53-ChIP-Seq/Homer	p53	basal_specific	11	0.0602
	KLF6(Zf)/PDAC-KLF6-ChIP-Seq(GSE64557)/Homer	KLF6	basal_specific	11	0.3711
	NF1(CTF)/LNCAP-NF1-ChIP-Seq(Unpublished)/Homer	NF1	basal_specific	10	0.1968
	EKLF(Zf)/Erythrocyte-Klf1-ChIP-Seq(GSE20478)/Homer	EKLF	basal_specific	10	0.115
	MafA(bZIP)/Islet-MafA-ChIP-Seq(GSE30298)/Homer	MafA	basal_specific	10	0.3194
	p73(p53)/Trachea-p73-ChIP-Seq(PRJNA310161)/Homer	p73	basal_specific	9	0.0378
	ZNF416(Zf)/HEK293-ZNF416.GFP-ChIP-Seq(GSE58341)/Homer	ZNF416	basal_specific	8	0.4915
	NFIL3(bZIP)/HepG2-NFIL3-ChIP-Seq(Encode)/Homer	NFIL3	basal_specific	8	0.2577
	NF1-halfsite(CTF)/LNCaP-NF1-ChIP-Seq(Unpublished)/Homer	NF1-halfsite	basal_specific	7	0.5826
	Sox3(HMG)/NPC-Sox3-ChIP-Seq(GSE33059)/Homer	Sox3	basal_specific	7	0.5448
	Rbpj1(?)/Panc1-Rbpj1-ChIP-Seq(GSE47459)/Homer	Rbpj1	basal_specific	6	0.5231
	Sp5(Zf)/mES-Sp5.Flag-ChIP-Seq(GSE72989)/Homer	Sp5	basal_specific	6	0.3148
	CEBP(bZIP)/ThioMac-CEBPb-ChIP-Seq(GSE21512)/Homer	CEBP	basal_specific	6	0.2639
	Smad3(MAD)/NPC-Smad3-ChIP-Seq(GSE36673)/Homer	Smad3	basal_specific	6	0.7384
	NFkB-p65-Rel(RHD)/ThioMac-LPS-Expression(GSE23622)/Homer	NFkB-p65-Rel	basal_specific	6	0.0432
	NFkB-p65(RHD)/GM12787-p65-ChIP-Seq(GSE19485)/Homer	NFkB-p65	basal_specific	6	0.233
	Tlx?(NR)/NPC-H3K4me1-ChIP-Seq(GSE16256)/Homer	Tlx?	basal_specific	6	0.1914
	Atf1(bZIP)/K562-ATF1-ChIP-Seq(GSE31477)/Homer	Atf1	basal_specific	6	0.2407
	Bcl6(Zf)/Liver-Bcl6-ChIP-Seq(GSE31578)/Homer	Bcl6	basal_specific	6	0.5108
	Meis1(Homeobox)/MastCells-Meis1-ChIP-Seq(GSE48085)/Homer	Meis1	basal_specific	6	0.5285
	Unknown-ESC-element(?)/mES-Nanog-ChIP-Seq(GSE11724)/Homer	Unknown-ESC-element	basal_specific	6	0.2585
	Klf9(Zf)/GBM-Klf9-ChIP-Seq(GSE62211)/Homer	Klf9	basal_specific	5	0.1381
	Prop1(Homeobox)/GHFT1-PROP1.biotin-ChIP-Seq(GSE77302)/Homer	Prop1	basal_specific	5	0.2731
	Ptf1a(bHLH)/Panc1-Ptf1a-ChIP-Seq(GSE47459)/Homer	Ptf1a	basal_specific	5	0.7176
	HIF-1b(HLH)/T47D-HIF1b-ChIP-Seq(GSE59937)/Homer	HIF-1b	basal_specific	5	0.3287
	Tgif2(Homeobox)/mES-Tgif2-ChIP-Seq(GSE55404)/Homer	Tgif2	basal_specific	5	0.8102
	STAT4(Stat)/CD4-Stat4-ChIP-Seq(GSE22104)/Homer	STAT4	basal_specific	5	0.3796
	Tbr1(T-box)/Cortex-Tbr1-ChIP-Seq(GSE71384)/Homer	Tbr1	basal_specific	5	0.4792
	Znf263(Zf)/K562-Znf263-ChIP-Seq(GSE31477)/Homer	Znf263	basal_specific	5	0.5779
	Sox10(HMG)/SciaticNerve-Sox3-ChIP-Seq(GSE35132)/Homer	Sox10	basal_specific	5	0.5093
	HLF(bZIP)/HSC-HLF.Flag-ChIP-Seq(GSE69817)/Homer	HLF	basal_specific	5	0.3094
	CEBP:AP1(bZIP)/ThioMac-CEBPb-ChIP-Seq(GSE21512)/Homer	CEBP:AP1	basal_specific	5	0.2901
	Tbet(T-box)/CD8-Tbet-ChIP-Seq(GSE33802)/Homer	Tbet	basal_specific	5	0.3927
	FOXK1(Forkhead)/HEK293-FOXK1-ChIP-Seq(GSE51673)/Homer	FOXK1	basal_specific	5	0.3789
	RUNX1(Runt)/Jurkat-RUNX1-ChIP-Seq(GSE29180)/Homer	RUNX1	basal_specific	5	0.3627
	Dlx3(Homeobox)/Kerainocytes-Dlx3-ChIP-Seq(GSE89884)/Homer	Dlx3	basal_specific	5	0.2863
	Stat3(Stat)/mES-Stat3-ChIP-Seq(GSE11431)/Homer	Stat3	basal_specific	5	0.2122
	Sox15(HMG)/CPA-Sox15-ChIP-Seq(GSE62909)/Homer	Sox15	basal_specific	5	0.3742
	Hoxd12(Homeobox)/ChickenMSG-Hoxd12.Flag-ChIP-Seq(GSE86088)/Homer	Hoxd12	basal_specific	5	0.5779
	Sox9(HMG)/Limb-SOX9-ChIP-Seq(GSE73225)/Homer	Sox9	basal_specific	5	0.3202
	KLF14(Zf)/HEK293-KLF14.GFP-ChIP-Seq(GSE58341)/Homer	KLF14	basal_specific	5	0.4691
	Tcf12(bHLH)/GM12878-Tcf12-ChIP-Seq(GSE32465)/Homer	Tcf12	basal_specific	5	0.3603
	Smad4(MAD)/ESC-SMAD4-ChIP-Seq(GSE29422)/Homer	Smad4	basal_specific	4	0.4838
	Hoxa11(Homeobox)/ChickenMSG-Hoxa11.Flag-ChIP-Seq(GSE86088)/Homer	Hoxa11	basal_specific	4	0.6736
	Stat3+il21(Stat)/CD4-Stat3-ChIP-Seq(GSE19198)/Homer	Stat3+il21	basal_specific	4	0.2816
	EWS:ERG-fusion(ETS)/CADO_ES1-EWS:ERG-ChIP-Seq(SRA014231)/Homer	EWS:ERG-fusion	basal_specific	4	0.2986
	Six2(Homeobox)/NephronProgenitor-Six2-ChIP-Seq(GSE39837)/Homer	Six2	basal_specific	4	0.3526
	ETS1(ETS)/Jurkat-ETS1-ChIP-Seq(GSE17954)/Homer	ETS1	basal_specific	4	0.3727
	Sox6(HMG)/Myotubes-Sox6-ChIP-Seq(GSE32627)/Homer	Sox6	basal_specific	4	0.5015
	Hoxc9(Homeobox)/Ainv15-Hoxc9-ChIP-Seq(GSE21812)/Homer	Hoxc9	basal_specific	4	0.2114
	NF1:FOXA1(CTF,Forkhead)/LNCAP-FOXA1-ChIP-Seq(GSE27824)/Homer	NF1:FOXA1	basal_specific	4	0.0332
	JunD(bZIP)/K562-JunD-ChIP-Seq/Homer	JunD	basal_specific	4	0.0394
	Sox2(HMG)/mES-Sox2-ChIP-Seq(GSE11431)/Homer	Sox2	basal_specific	4	0.3094
	PGR(NR)/EndoStromal-PGR-ChIP-Seq(GSE69539)/Homer	PGR	basal_specific	4	0.1026
	Mef2a(MADS)/HL1-Mef2a.biotin-ChIP-Seq(GSE21529)/Homer	Mef2a	basal_specific	4	0.1852
	ETV1(ETS)/GIST48-ETV1-ChIP-Seq(GSE22441)/Homer	ETV1	basal_specific	4	0.4475
	Maz(Zf)/HepG2-Maz-ChIP-Seq(GSE31477)/Homer	Maz	basal_specific	4	0.3912
	STAT6(Stat)/Macrophage-Stat6-ChIP-Seq(GSE38377)/Homer	STAT6	basal_specific	4	0.2454
	TRPS1(Zf)/MCF7-TRPS1-ChIP-Seq(GSE107013)/Homer	TRPS1	basal_specific	4	0.6003
	Pdx1(Homeobox)/Islet-Pdx1-ChIP-Seq(SRA008281)/Homer	Pdx1	basal_specific	4	0.3634
	Etv2(ETS)/ES-ER71-ChIP-Seq(GSE59402)/Homer	Etv2	basal_specific	4	0.3449
	Phox2a(Homeobox)/Neuron-Phox2a-ChIP-Seq(GSE31456)/Homer	Phox2a	basal_specific	4	0.1813
	STAT6(Stat)/CD4-Stat6-ChIP-Seq(GSE22104)/Homer	STAT6	basal_specific	4	0.2431
	EHF(ETS)/LoVo-EHF-ChIP-Seq(GSE49402)/Homer	EHF	basal_specific	4	0.4552
	Hoxd11(Homeobox)/ChickenMSG-Hoxd11.Flag-ChIP-Seq(GSE86088)/Homer	Hoxd11	basal_specific	4	0.6844
	Pitx1(Homeobox)/Chicken-Pitx1-ChIP-Seq(GSE38910)/Homer	Pitx1	basal_specific	4	0.8827
	OCT:OCT-short(POU,Homeobox)/NPC-OCT6-ChIP-Seq(GSE43916)/Homer	OCT:OCT-short	basal_specific	4	0.2932
	Foxo3(Forkhead)/U2OS-Foxo3-ChIP-Seq(E-MTAB-2701)/Homer	Foxo3	basal_specific	4	0.277
	Nkx6.1(Homeobox)/Islet-Nkx6.1-ChIP-Seq(GSE40975)/Homer	Nkx6.1	basal_specific	4	0.6983
	Pit1(Homeobox)/GCrat-Pit1-ChIP-Seq(GSE58009)/Homer	Pit1	basal_specific	4	0.3704
	Isl1(Homeobox)/Neuron-Isl1-ChIP-Seq(GSE31456)/Homer	Isl1	basal_specific	4	0.5849
	WT1(Zf)/Kidney-WT1-ChIP-Seq(GSE90016)/Homer	WT1	basal_specific	4	0.223
	SCL(bHLH)/HPC7-Scl-ChIP-Seq(GSE13511)/Homer	SCL	basal_specific	4	0.8904
	Tgif1(Homeobox)/mES-Tgif1-ChIP-Seq(GSE55404)/Homer	Tgif1	basal_specific	4	0.7701
	Foxo1(Forkhead)/RAW-Foxo1-ChIP-Seq(Fan_et_al.)/Homer	Foxo1	basal_specific	4	0.571
	Mef2b(MADS)/HEK293-Mef2b.V5-ChIP-Seq(GSE67450)/Homer	Mef2b	basal_specific	4	0.3179
	ERG(ETS)/VCaP-ERG-ChIP-Seq(GSE14097)/Homer	ERG	basal_specific	4	0.5255
	Tbx5(T-box)/HL1-Tbx5.biotin-ChIP-Seq(GSE21529)/Homer	Tbx5	basal_specific	4	0.7832
	Sp2(Zf)/HEK293-Sp2.eGFP-ChIP-Seq(Encode)/Homer	Sp2	basal_specific	4	0.4336
	Gata6(Zf)/HUG1N-GATA6-ChIP-Seq(GSE51936)/Homer	Gata6	basal_specific	3	0.3333
	Rfx6(HTH)/Min6b1-Rfx6.HA-ChIP-Seq(GSE62844)/Homer	Rfx6	basal_specific	3	0.3688
	Six1(Homeobox)/Myoblast-Six1-ChIP-Chip(GSE20150)/Homer	Six1	basal_specific	3	0.1057
	Mef2d(MADS)/Retina-Mef2d-ChIP-Seq(GSE61391)/Homer	Mef2d	basal_specific	3	0.0903
	Gata4(Zf)/Heart-Gata4-ChIP-Seq(GSE35151)/Homer	Gata4	basal_specific	3	0.358
	Rfx5(HTH)/GM12878-Rfx5-ChIP-Seq(GSE31477)/Homer	Rfx5	basal_specific	3	0.1211
	Lhx1(Homeobox)/EmbryoCarcinoma-Lhx1-ChIP-Seq(GSE70957)/Homer	Lhx1	basal_specific	3	0.4105
	Zic(Zf)/Cerebellum-ZIC1.2-ChIP-Seq(GSE60731)/Homer	Zic	basal_specific	3	0.304
	PBX2(Homeobox)/K562-PBX2-ChIP-Seq(Encode)/Homer	PBX2	basal_specific	3	0.311
	Tbx21(T-box)/GM12878-TBX21-ChIP-Seq(Encode)/Homer	Tbx21	basal_specific	3	0.3665
	BMYB(HTH)/Hela-BMYB-ChIP-Seq(GSE27030)/Homer	BMYB	basal_specific	3	0.463
	GRHL2(CP2)/HBE-GRHL2-ChIP-Seq(GSE46194)/Homer	GRHL2	basal_specific	3	0.1427
	HEB(bHLH)/mES-Heb-ChIP-Seq(GSE53233)/Homer	HEB	basal_specific	3	0.5802
	RUNX-AML(Runt)/CD4+-PolII-ChIP-Seq(Barski_et_al.)/Homer	RUNX-AML	basal_specific	3	0.2593
	RUNX(Runt)/HPC7-Runx1-ChIP-Seq(GSE22178)/Homer	RUNX	basal_specific	3	0.2546
	Hoxd13(Homeobox)/ChickenMSG-Hoxd13.Flag-ChIP-Seq(GSE86088)/Homer	Hoxd13	basal_specific	3	0.5247
	CDX4(Homeobox)/ZebrafishEmbryos-Cdx4.Myc-ChIP-Seq(GSE48254)/Homer	CDX4	basal_specific	3	0.3287
	Lhx3(Homeobox)/Neuron-Lhx3-ChIP-Seq(GSE31456)/Homer	Lhx3	basal_specific	3	0.5301
	Gata2(Zf)/K562-GATA2-ChIP-Seq(GSE18829)/Homer	Gata2	basal_specific	3	0.2454
	Tcfcp2l1(CP2)/mES-Tcfcp2l1-ChIP-Seq(GSE11431)/Homer	Tcfcp2l1	basal_specific	3	0.0594
	GATA3(Zf)/iTreg-Gata3-ChIP-Seq(GSE20898)/Homer	GATA3	basal_specific	3	0.483
	NFAT(RHD)/Jurkat-NFATC1-ChIP-Seq(Jolma_et_al.)/Homer	NFAT	basal_specific	3	0.3503
	GSC(Homeobox)/FrogEmbryos-GSC-ChIP-Seq(DRA000576)/Homer	GSC	basal_specific	3	0.3858
	FoxD3(forkhead)/ZebrafishEmbryo-Foxd3.biotin-ChIP-seq(GSE106676)/Homer	FoxD3	basal_specific	3	0.3086
	Otx2(Homeobox)/EpiLC-Otx2-ChIP-Seq(GSE56098)/Homer	Otx2	basal_specific	3	0.2778
	PU.1-IRF(ETS:IRF)/Bcell-PU.1-ChIP-Seq(GSE21512)/Homer	PU.1-IRF	basal_specific	3	0.4583
	RUNX2(Runt)/PCa-RUNX2-ChIP-Seq(GSE33889)/Homer	RUNX2	basal_specific	3	0.2894
	Ap4(bHLH)/AML-Tfap4-ChIP-Seq(GSE45738)/Homer	Ap4	basal_specific	3	0.4159
	Chop(bZIP)/MEF-Chop-ChIP-Seq(GSE35681)/Homer	Chop	basal_specific	3	0.0972
	Eomes(T-box)/H9-Eomes-ChIP-Seq(GSE26097)/Homer	Eomes	basal_specific	3	0.6343
	Cdx2(Homeobox)/mES-Cdx2-ChIP-Seq(GSE14586)/Homer	Cdx2	basal_specific	3	0.2701
	CRX(Homeobox)/Retina-Crx-ChIP-Seq(GSE20012)/Homer	CRX	basal_specific	3	0.642
	Zic3(Zf)/mES-Zic3-ChIP-Seq(GSE37889)/Homer	Zic3	basal_specific	3	0.2407
	Smad2(MAD)/ES-SMAD2-ChIP-Seq(GSE29422)/Homer	Smad2	basal_specific	3	0.4653
	bZIP:IRF(bZIP,IRF)/Th17-BatF-ChIP-Seq(GSE39756)/Homer	bZIP:IRF	basal_specific	3	0.1775
	BHLHA15(bHLH)/NIH3T3-BHLHB8.HA-ChIP-Seq(GSE119782)/Homer	BHLHA15	basal_specific	3	0.4653
	GABPA(ETS)/Jurkat-GABPa-ChIP-Seq(GSE17954)/Homer	GABPA	basal_specific	3	0.304
	Lhx2(Homeobox)/HFSC-Lhx2-ChIP-Seq(GSE48068)/Homer	Lhx2	basal_specific	3	0.385
	RARa(NR)/K562-RARa-ChIP-Seq(Encode)/Homer	RARa	basal_specific	3	0.7184
	FOXK2(Forkhead)/U2OS-FOXK2-ChIP-Seq(E-MTAB-2204)/Homer	FOXK2	basal_specific	3	0.2438
	Tcf21(bHLH)/ArterySmoothMuscle-Tcf21-ChIP-Seq(GSE61369)/Homer	Tcf21	basal_specific	3	0.3441
	EBF1(EBF)/Near-E2A-ChIP-Seq(GSE21512)/Homer	EBF1	basal_specific	3	0.402
	PR(NR)/T47D-PR-ChIP-Seq(GSE31130)/Homer	PR	basal_specific	3	0.6181
	Mef2c(MADS)/GM12878-Mef2c-ChIP-Seq(GSE32465)/Homer	Mef2c	basal_specific	3	0.1813
	Elf4(ETS)/BMDM-Elf4-ChIP-Seq(GSE88699)/Homer	Elf4	basal_specific	3	0.3472
	GRE(NR),IR3/RAW264.7-GRE-ChIP-Seq(Unpublished)/Homer	GRE	basal_specific	3	0.0934
	Foxa3(Forkhead)/Liver-Foxa3-ChIP-Seq(GSE77670)/Homer	Foxa3	basal_specific	3	0.1335
	Gata1(Zf)/K562-GATA1-ChIP-Seq(GSE18829)/Homer	Gata1	basal_specific	3	0.2199
	FoxL2(Forkhead)/Ovary-FoxL2-ChIP-Seq(GSE60858)/Homer	FoxL2	basal_specific	3	0.3032
	TCF4(bHLH)/SHSY5Y-TCF4-ChIP-Seq(GSE96915)/Homer	TCF4	basal_specific	3	0.4977
	Olig2(bHLH)/Neuron-Olig2-ChIP-Seq(GSE30882)/Homer	Olig2	basal_specific	3	0.5849
	Atf4(bZIP)/MEF-Atf4-ChIP-Seq(GSE35681)/Homer	Atf4	basal_specific	3	0.1157
	E2A(bHLH)/proBcell-E2A-ChIP-Seq(GSE21978)/Homer	E2A	basal_specific	3	0.4784
	Hoxa9(Homeobox)/ChickenMSG-Hoxa9.Flag-ChIP-Seq(GSE86088)/Homer	Hoxa9	basal_specific	2	0.7153
	Egr1(Zf)/K562-Egr1-ChIP-Seq(GSE32465)/Homer	Egr1	basal_specific	2	0.2215
	ETV4(ETS)/HepG2-ETV4-ChIP-Seq(ENCODE)/Homer	ETV4	basal_specific	2	0.3557
	Twist2(bHLH)/Myoblast-Twist2.Ty1-ChIP-Seq(GSE127998)/Homer	Twist2	basal_specific	2	0.5417
	CRE(bZIP)/Promoter/Homer	CRE	basal_specific	2	0.0702
	Gfi1b(Zf)/HPC7-Gfi1b-ChIP-Seq(GSE22178)/Homer	Gfi1b	basal_specific	2	0.2369
	Foxf1(Forkhead)/Lung-Foxf1-ChIP-Seq(GSE77951)/Homer	Foxf1	basal_specific	2	0.3218
	ZEB2(Zf)/SNU398-ZEB2-ChIP-Seq(GSE103048)/Homer	ZEB2	basal_specific	2	0.3627
	NeuroG2(bHLH)/Fibroblast-NeuroG2-ChIP-Seq(GSE75910)/Homer	NeuroG2	basal_specific	2	0.4992
	AR-halfsite(NR)/LNCaP-AR-ChIP-Seq(GSE27824)/Homer	AR-halfsite	basal_specific	2	0.8287
	EWS:FLI1-fusion(ETS)/SK_N_MC-EWS:FLI1-ChIP-Seq(SRA014231)/Homer	EWS:FLI1-fusion	basal_specific	2	0.206
	ZEB1(Zf)/PDAC-ZEB1-ChIP-Seq(GSE64557)/Homer	ZEB1	basal_specific	2	0.5556
	Fli1(ETS)/CD8-FLI-ChIP-Seq(GSE20898)/Homer	Fli1	basal_specific	2	0.3603
	HIF-1a(bHLH)/MCF7-HIF1a-ChIP-Seq(GSE28352)/Homer	HIF-1a	basal_specific	2	0.0872
	Nkx3.1(Homeobox)/LNCaP-Nkx3.1-ChIP-Seq(GSE28264)/Homer	Nkx3.1	basal_specific	2	0.6343
	FOXA1(Forkhead)/MCF7-FOXA1-ChIP-Seq(GSE26831)/Homer	FOXA1	basal_specific	2	0.338
	Erra(NR)/HepG2-Erra-ChIP-Seq(GSE31477)/Homer	Erra	basal_specific	2	0.5972
	Oct4(POU,Homeobox)/mES-Oct4-ChIP-Seq(GSE11431)/Homer	2020-10-04	basal_specific	2	0.1829
	Ascl1(bHLH)/NeuralTubes-Ascl1-ChIP-Seq(GSE55840)/Homer	Ascl1	basal_specific	2	0.4992
	Phox2b(Homeobox)/CLBGA-PHOX2B-ChIP-Seq(GSE90683)/Homer	Phox2b	basal_specific	2	0.098
	PRDM10(Zf)/HEK293-PRDM10.eGFP-ChIP-Seq(Encode)/Homer	PRDM10	basal_specific	2	0.2315
	c-Myc(bHLH)/LNCAP-cMyc-ChIP-Seq(Unpublished)/Homer	c-Myc	basal_specific	2	0.1327
	Myf5(bHLH)/GM-Myf5-ChIP-Seq(GSE24852)/Homer	Myf5	basal_specific	2	0.2562
	FOXM1(Forkhead)/MCF7-FOXM1-ChIP-Seq(GSE72977)/Homer	FOXM1	basal_specific	2	0.3503
	Hoxa13(Homeobox)/ChickenMSG-Hoxa13.Flag-ChIP-Seq(GSE86088)/Homer	Hoxa13	basal_specific	2	0.6806
	KLF10(Zf)/HEK293-KLF10.GFP-ChIP-Seq(GSE58341)/Homer	KLF10	basal_specific	2	0.1821
	ELF3(ETS)/PDAC-ELF3-ChIP-Seq(GSE64557)/Homer	ELF3	basal_specific	2	0.2762
	LXH9(Homeobox)/Hct116-LXH9.V5-ChIP-Seq(GSE116822)/Homer	LXH9	basal_specific	2	0.4676
	LEF1(HMG)/H1-LEF1-ChIP-Seq(GSE64758)/Homer	LEF1	basal_specific	2	0.2508
	THRb(NR)/HepG2-THRb.Flag-ChIP-Seq(Encode)/Homer	THRb	basal_specific	2	0.2168
	THRb(NR)/Liver-NR1A2-ChIP-Seq(GSE52613)/Homer	THRb	basal_specific	2	0.8418
	STAT5(Stat)/mCD4+-Stat5-ChIP-Seq(GSE12346)/Homer	STAT5	basal_specific	2	0.1481
	FOXA1(Forkhead)/LNCAP-FOXA1-ChIP-Seq(GSE27824)/Homer	FOXA1	basal_specific	2	0.392
	Sox4(HMG)/proB-Sox4-ChIP-Seq(GSE50066)/Homer	Sox4	basal_specific	2	0.2824
	MyoG(bHLH)/C2C12-MyoG-ChIP-Seq(GSE36024)/Homer	MyoG	basal_specific	2	0.3634
	HIF2a(bHLH)/785_O-HIF2a-ChIP-Seq(GSE34871)/Homer	HIF2a	basal_specific	2	0.1165
	ZNF189(Zf)/HEK293-ZNF189.GFP-ChIP-Seq(GSE58341)/Homer	ZNF189	basal_specific	2	0.294
	IRF2(IRF)/Erythroblas-IRF2-ChIP-Seq(GSE36985)/Homer	IRF2	basal_specific	2	0.0432
	Sox17(HMG)/Endoderm-Sox17-ChIP-Seq(GSE61475)/Homer	Sox17	basal_specific	2	0.2477
	SPDEF(ETS)/VCaP-SPDEF-ChIP-Seq(SRA014231)/Homer	SPDEF	basal_specific	2	0.3465
	FOXP1(Forkhead)/H9-FOXP1-ChIP-Seq(GSE31006)/Homer	FOXP1	basal_specific	2	0.1605
	STAT1(Stat)/HelaS3-STAT1-ChIP-Seq(GSE12782)/Homer	STAT1	basal_specific	2	0.1281
	bHLHE41(bHLH)/proB-Bhlhe41-ChIP-Seq(GSE93764)/Homer	bHLHE41	basal_specific	2	0.3048
	ELF5(ETS)/T47D-ELF5-ChIP-Seq(GSE30407)/Homer	ELF5	basal_specific	2	0.2693
	Oct6(POU,Homeobox)/NPC-Pou3f1-ChIP-Seq(GSE35496)/Homer	2020-10-06	basal_specific	2	0.159
	Atoh1(bHLH)/Cerebellum-Atoh1-ChIP-Seq(GSE22111)/Homer	Atoh1	basal_specific	2	0.3773
	IRF:BATF(IRF:bZIP)/pDC-Irf8-ChIP-Seq(GSE66899)/Homer	IRF:BATF	basal_specific	2	0.0571
	Hoxb4(Homeobox)/ES-Hoxb4-ChIP-Seq(GSE34014)/Homer	Hoxb4	basal_specific	2	0.0818
	IRF8(IRF)/BMDM-IRF8-ChIP-Seq(GSE77884)/Homer	IRF8	basal_specific	2	0.1281
	IRF1(IRF)/PBMC-IRF1-ChIP-Seq(GSE43036)/Homer	IRF1	basal_specific	2	0.0617
	ZBTB18(Zf)/HEK293-ZBTB18.GFP-ChIP-Seq(GSE58341)/Homer	ZBTB18	basal_specific	2	0.1898
	MafF(bZIP)/HepG2-MafF-ChIP-Seq(GSE31477)/Homer	MafF	basal_specific	2	0.1173
	Pit1+1bp(Homeobox)/GCrat-Pit1-ChIP-Seq(GSE58009)/Homer	Pit1+1bp	basal_specific	2	0.1528
	Rfx1(HTH)/NPC-H3K4me1-ChIP-Seq(GSE16256)/Homer	Rfx1	basal_specific	2	0.0772
	GLIS3(Zf)/Thyroid-Glis3.GFP-ChIP-Seq(GSE103297)/Homer	GLIS3	basal_specific	2	0.4421
	ZSCAN22(Zf)/HEK293-ZSCAN22.GFP-ChIP-Seq(GSE58341)/Homer	ZSCAN22	basal_specific	2	0.0378
	E2F4(E2F)/K562-E2F4-ChIP-Seq(GSE31477)/Homer	E2F4	basal_specific	2	0.1103
	Fosl2(bZIP)/3T3L1-Fosl2-ChIP-Seq(GSE56872)/Homer	Fosl2	shared	412	0.3924
	Jun-AP1(bZIP)/K562-cJun-ChIP-Seq(GSE31477)/Homer	Jun-AP1	shared	404	0.3321
	Fra2(bZIP)/Striatum-Fra2-ChIP-Seq(GSE43429)/Homer	Fra2	shared	397	0.462
	Fra1(bZIP)/BT549-Fra1-ChIP-Seq(GSE46166)/Homer	Fra1	shared	387	0.4915
	JunB(bZIP)/DendriticCells-Junb-ChIP-Seq(GSE36099)/Homer	JunB	shared	379	0.4829
	Atf3(bZIP)/GBM-ATF3-ChIP-Seq(GSE33912)/Homer	Atf3	shared	370	0.5229
	BATF(bZIP)/Th17-BATF-ChIP-Seq(GSE39756)/Homer	BATF	shared	353	0.5088
	AP-1(bZIP)/ThioMac-PU.1-ChIP-Seq(GSE21512)/Homer	AP-1	shared	331	0.5344
	Bach2(bZIP)/OCILy7-Bach2-ChIP-Seq(GSE44420)/Homer	Bach2	shared	211	0.2257
	CTCF(Zf)/CD4+-CTCF-ChIP-Seq(Barski_et_al.)/Homer	CTCF	shared	140	0.1713
	BORIS(Zf)/K562-CTCFL-ChIP-Seq(GSE32465)/Homer	BORIS	shared	94	0.2124
	NF-E2(bZIP)/K562-NFE2-ChIP-Seq(GSE31477)/Homer	NF-E2	shared	92	0.0797
	Nrf2(bZIP)/Lymphoblast-Nrf2-ChIP-Seq(GSE37589)/Homer	Nrf2	shared	89	0.0703
	p63(p53)/Keratinocyte-p63-ChIP-Seq(GSE17611)/Homer	p63	shared	75	0.2254
	Bach1(bZIP)/K562-Bach1-ChIP-Seq(GSE31477)/Homer	Bach1	shared	71	0.0671
	p53(p53)/Saos-p53-ChIP-Seq(GSE15780)/Homer	p53	shared	70	0.092
	p53(p53)/Saos-p53-ChIP-Seq/Homer	p53	shared	70	0.092
	GRHL2(CP2)/HBE-GRHL2-ChIP-Seq(GSE46194)/Homer	GRHL2	shared	61	0.2128
	p73(p53)/Trachea-p73-ChIP-Seq(PRJNA310161)/Homer	p73	shared	61	0.0613
	MafK(bZIP)/C2C12-MafK-ChIP-Seq(GSE36030)/Homer	MafK	shared	58	0.1457
	NFE2L2(bZIP)/HepG2-NFE2L2-ChIP-Seq(Encode)/Homer	NFE2L2	shared	49	0.0541
	TEAD4(TEA)/Tropoblast-Tead4-ChIP-Seq(GSE37350)/Homer	TEAD4	shared	44	0.3877
	TEAD1(TEAD)/HepG2-TEAD1-ChIP-Seq(Encode)/Homer	TEAD1	shared	43	0.423
	TEAD(TEA)/Fibroblast-PU.1-ChIP-Seq(Unpublished)/Homer	TEAD	shared	41	0.3191
	TEAD2(TEA)/Py2T-Tead2-ChIP-Seq(GSE55709)/Homer	TEAD2	shared	40	0.264
	Klf4(Zf)/mES-Klf4-ChIP-Seq(GSE11431)/Homer	Klf4	shared	36	0.2203
	TEAD3(TEA)/HepG2-TEAD3-ChIP-Seq(Encode)/Homer	TEAD3	shared	36	0.4529
	ERG(ETS)/VCaP-ERG-ChIP-Seq(GSE14097)/Homer	ERG	shared	35	0.6091
	MafA(bZIP)/Islet-MafA-ChIP-Seq(GSE30298)/Homer	MafA	shared	35	0.3458
	ETV1(ETS)/GIST48-ETV1-ChIP-Seq(GSE22441)/Homer	ETV1	shared	34	0.5431
	Etv2(ETS)/ES-ER71-ChIP-Seq(GSE59402)/Homer	Etv2	shared	33	0.4169
	Elf4(ETS)/BMDM-Elf4-ChIP-Seq(GSE88699)/Homer	Elf4	shared	32	0.4371
	KLF5(Zf)/LoVo-KLF5-ChIP-Seq(GSE49402)/Homer	KLF5	shared	31	0.515
	KLF3(Zf)/MEF-Klf3-ChIP-Seq(GSE44748)/Homer	KLF3	shared	31	0.2622
	Fli1(ETS)/CD8-FLI-ChIP-Seq(GSE20898)/Homer	Fli1	shared	30	0.4659
	Foxo1(Forkhead)/RAW-Foxo1-ChIP-Seq(Fan_et_al.)/Homer	Foxo1	shared	30	0.6159
	ETS1(ETS)/Jurkat-ETS1-ChIP-Seq(GSE17954)/Homer	ETS1	shared	30	0.4407
	KLF6(Zf)/PDAC-KLF6-ChIP-Seq(GSE64557)/Homer	KLF6	shared	27	0.4555
	GABPA(ETS)/Jurkat-GABPa-ChIP-Seq(GSE17954)/Homer	GABPA	shared	27	0.3909
	ETV4(ETS)/HepG2-ETV4-ChIP-Seq(ENCODE)/Homer	ETV4	shared	26	0.4623
	FOXM1(Forkhead)/MCF7-FOXM1-ChIP-Seq(GSE72977)/Homer	FOXM1	shared	25	0.3732
	ELF5(ETS)/T47D-ELF5-ChIP-Seq(GSE30407)/Homer	ELF5	shared	24	0.3271
	MafB(bZIP)/BMM-Mafb-ChIP-Seq(GSE75722)/Homer	MafB	shared	24	0.1828
	EWS:ERG-fusion(ETS)/CADO_ES1-EWS:ERG-ChIP-Seq(SRA014231)/Homer	EWS:ERG-fusion	shared	24	0.3238
	EHF(ETS)/LoVo-EHF-ChIP-Seq(GSE49402)/Homer	EHF	shared	24	0.5023
	EKLF(Zf)/Erythrocyte-Klf1-ChIP-Seq(GSE20478)/Homer	EKLF	shared	24	0.1244
	ELF3(ETS)/PDAC-ELF3-ChIP-Seq(GSE64557)/Homer	ELF3	shared	23	0.3231
	CEBP:AP1(bZIP)/ThioMac-CEBPb-ChIP-Seq(GSE21512)/Homer	CEBP:AP1	shared	23	0.2943
	Foxa2(Forkhead)/Liver-Foxa2-ChIP-Seq(GSE25694)/Homer	Foxa2	shared	23	0.3076
	Sp2(Zf)/HEK293-Sp2.eGFP-ChIP-Seq(Encode)/Homer	Sp2	shared	22	0.5554
	FOXA1(Forkhead)/LNCAP-FOXA1-ChIP-Seq(GSE27824)/Homer	FOXA1	shared	22	0.41
	Sp5(Zf)/mES-Sp5.Flag-ChIP-Seq(GSE72989)/Homer	Sp5	shared	22	0.4154
	Foxo3(Forkhead)/U2OS-Foxo3-ChIP-Seq(E-MTAB-2701)/Homer	Foxo3	shared	21	0.2856
	NF1(CTF)/LNCAP-NF1-ChIP-Seq(Unpublished)/Homer	NF1	shared	21	0.2117
	FOXP1(Forkhead)/H9-FOXP1-ChIP-Seq(GSE31006)/Homer	FOXP1	shared	20	0.1864
	HLF(bZIP)/HSC-HLF.Flag-ChIP-Seq(GSE69817)/Homer	HLF	shared	20	0.2997
	FOXA1(Forkhead)/MCF7-FOXA1-ChIP-Seq(GSE26831)/Homer	FOXA1	shared	19	0.3512
	FOXK1(Forkhead)/HEK293-FOXK1-ChIP-Seq(GSE51673)/Homer	FOXK1	shared	19	0.3711
	SPDEF(ETS)/VCaP-SPDEF-ChIP-Seq(SRA014231)/Homer	SPDEF	shared	19	0.4035
	Six2(Homeobox)/NephronProgenitor-Six2-ChIP-Seq(GSE39837)/Homer	Six2	shared	19	0.3621
	CEBP(bZIP)/ThioMac-CEBPb-ChIP-Seq(GSE21512)/Homer	CEBP	shared	18	0.2535
	Tgif2(Homeobox)/mES-Tgif2-ChIP-Seq(GSE55404)/Homer	Tgif2	shared	18	0.8017
	Foxf1(Forkhead)/Lung-Foxf1-ChIP-Seq(GSE77951)/Homer	Foxf1	shared	18	0.3264
	NFIL3(bZIP)/HepG2-NFIL3-ChIP-Seq(Encode)/Homer	NFIL3	shared	17	0.2384
	Fox:Ebox(Forkhead,bHLH)/Panc1-Foxa2-ChIP-Seq(GSE47459)/Homer	Fox:Ebox	shared	17	0.3567
	Foxa3(Forkhead)/Liver-Foxa3-ChIP-Seq(GSE77670)/Homer	Foxa3	shared	17	0.1468
	NF1-halfsite(CTF)/LNCaP-NF1-ChIP-Seq(Unpublished)/Homer	NF1-halfsite	shared	17	0.6001
	FoxD3(forkhead)/ZebrafishEmbryo-Foxd3.biotin-ChIP-seq(GSE106676)/Homer	FoxD3	shared	17	0.3137
	AR-halfsite(NR)/LNCaP-AR-ChIP-Seq(GSE27824)/Homer	AR-halfsite	shared	17	0.8615
	AP-2alpha(AP2)/Hela-AP2alpha-ChIP-Seq(GSE31477)/Homer	AP-2alpha	shared	17	0.4025
	FoxL2(Forkhead)/Ovary-FoxL2-ChIP-Seq(GSE60858)/Homer	FoxL2	shared	16	0.3069
	Tbx5(T-box)/HL1-Tbx5.biotin-ChIP-Seq(GSE21529)/Homer	Tbx5	shared	16	0.811
	Rfx5(HTH)/GM12878-Rfx5-ChIP-Seq(GSE31477)/Homer	Rfx5	shared	15	0.1392
	FOXK2(Forkhead)/U2OS-FOXK2-ChIP-Seq(E-MTAB-2204)/Homer	FOXK2	shared	15	0.2521
	Elk4(ETS)/Hela-Elk4-ChIP-Seq(GSE31477)/Homer	Elk4	shared	15	0.2495
	Elk1(ETS)/Hela-Elk1-ChIP-Seq(GSE31477)/Homer	Elk1	shared	15	0.2495
	KLF14(Zf)/HEK293-KLF14.GFP-ChIP-Seq(GSE58341)/Homer	KLF14	shared	15	0.5658
	ELF1(ETS)/Jurkat-ELF1-ChIP-Seq(SRA014231)/Homer	ELF1	shared	15	0.233
	Sp1(Zf)/Promoter/Homer	Sp1	shared	15	0.1511
	AP-2gamma(AP2)/MCF7-TFAP2C-ChIP-Seq(GSE21234)/Homer	AP-2gamma	shared	14	0.4692
	EWS:FLI1-fusion(ETS)/SK_N_MC-EWS:FLI1-ChIP-Seq(SRA014231)/Homer	EWS:FLI1-fusion	shared	14	0.2506
	Ets1-distal(ETS)/CD4+-PolII-ChIP-Seq(Barski_et_al.)/Homer	Ets1-distal	shared	14	0.1442
	Hoxa13(Homeobox)/ChickenMSG-Hoxa13.Flag-ChIP-Seq(GSE86088)/Homer	Hoxa13	shared	14	0.6653
	Klf9(Zf)/GBM-Klf9-ChIP-Seq(GSE62211)/Homer	Klf9	shared	14	0.1915
	KLF10(Zf)/HEK293-KLF10.GFP-ChIP-Seq(GSE58341)/Homer	KLF10	shared	14	0.2445
	Hoxd13(Homeobox)/ChickenMSG-Hoxd13.Flag-ChIP-Seq(GSE86088)/Homer	Hoxd13	shared	14	0.498
	Atf4(bZIP)/MEF-Atf4-ChIP-Seq(GSE35681)/Homer	Atf4	shared	14	0.1204
	CRX(Homeobox)/Retina-Crx-ChIP-Seq(GSE20012)/Homer	CRX	shared	14	0.6282
	Chop(bZIP)/MEF-Chop-ChIP-Seq(GSE35681)/Homer	Chop	shared	14	0.0974
	c-Jun-CRE(bZIP)/K562-cJun-ChIP-Seq(GSE31477)/Homer	c-Jun-CRE	shared	13	0.1215
	PU.1(ETS)/ThioMac-PU.1-ChIP-Seq(GSE21512)/Homer	PU.1	shared	13	0.22
	Tlx?(NR)/NPC-H3K4me1-ChIP-Seq(GSE16256)/Homer	Tlx?	shared	13	0.1983
	HOXB13(Homeobox)/ProstateTumor-HOXB13-ChIP-Seq(GSE56288)/Homer	HOXB13	shared	13	0.3613
	RUNX(Runt)/HPC7-Runx1-ChIP-Seq(GSE22178)/Homer	RUNX	shared	12	0.2687
	Hoxd11(Homeobox)/ChickenMSG-Hoxd11.Flag-ChIP-Seq(GSE86088)/Homer	Hoxd11	shared	12	0.6545
	RUNX-AML(Runt)/CD4+-PolII-ChIP-Seq(Barski_et_al.)/Homer	RUNX-AML	shared	12	0.2669
	Pitx1(Homeobox)/Chicken-Pitx1-ChIP-Seq(GSE38910)/Homer	Pitx1	shared	12	0.8633
	Smad3(MAD)/NPC-Smad3-ChIP-Seq(GSE36673)/Homer	Smad3	shared	12	0.7353
	ETS(ETS)/Promoter/Homer	ETS	shared	11	0.1529
	SCL(bHLH)/HPC7-Scl-ChIP-Seq(GSE13511)/Homer	SCL	shared	11	0.908
	RUNX2(Runt)/PCa-RUNX2-ChIP-Seq(GSE33889)/Homer	RUNX2	shared	11	0.2928
	HIC1(Zf)/Treg-ZBTB29-ChIP-Seq(GSE99889)/Homer	HIC1	shared	11	0.6506
	Tcfcp2l1(CP2)/mES-Tcfcp2l1-ChIP-Seq(GSE11431)/Homer	Tcfcp2l1	shared	11	0.0732
	Atf1(bZIP)/K562-ATF1-ChIP-Seq(GSE31477)/Homer	Atf1	shared	11	0.2315
	PR(NR)/T47D-PR-ChIP-Seq(GSE31130)/Homer	PR	shared	11	0.6221
	IRF4(IRF)/GM12878-IRF4-ChIP-Seq(GSE32465)/Homer	IRF4	shared	11	0.1742
	Nanog(Homeobox)/mES-Nanog-ChIP-Seq(GSE11724)/Homer	Nanog	shared	11	0.8669
	IRF8(IRF)/BMDM-IRF8-ChIP-Seq(GSE77884)/Homer	IRF8	shared	11	0.1461
	CDX4(Homeobox)/ZebrafishEmbryos-Cdx4.Myc-ChIP-Seq(GSE48254)/Homer	CDX4	shared	10	0.3065
	Hoxd12(Homeobox)/ChickenMSG-Hoxd12.Flag-ChIP-Seq(GSE86088)/Homer	Hoxd12	shared	10	0.5301
	IRF3(IRF)/BMDM-Irf3-ChIP-Seq(GSE67343)/Homer	IRF3	shared	10	0.1446
	PRDM1(Zf)/Hela-PRDM1-ChIP-Seq(GSE31477)/Homer	PRDM1	shared	10	0.2265
	RUNX1(Runt)/Jurkat-RUNX1-ChIP-Seq(GSE29180)/Homer	RUNX1	shared	10	0.3541
	Six1(Homeobox)/Myoblast-Six1-ChIP-Chip(GSE20150)/Homer	Six1	shared	10	0.1057
	Gfi1b(Zf)/HPC7-Gfi1b-ChIP-Seq(GSE22178)/Homer	Gfi1b	shared	10	0.242
	PBX2(Homeobox)/K562-PBX2-ChIP-Seq(Encode)/Homer	PBX2	shared	10	0.2856
	Tgif1(Homeobox)/mES-Tgif1-ChIP-Seq(GSE55404)/Homer	Tgif1	shared	10	0.7461
	Isl1(Homeobox)/Neuron-Isl1-ChIP-Seq(GSE31456)/Homer	Isl1	shared	10	0.5586
	Hoxa11(Homeobox)/ChickenMSG-Hoxa11.Flag-ChIP-Seq(GSE86088)/Homer	Hoxa11	shared	9	0.6271
	Nkx6.1(Homeobox)/Islet-Nkx6.1-ChIP-Seq(GSE40975)/Homer	Nkx6.1	shared	9	0.6455
	Ap4(bHLH)/AML-Tfap4-ChIP-Seq(GSE45738)/Homer	Ap4	shared	9	0.4425
	TATA-Box(TBP)/Promoter/Homer	TATA-Box	shared	9	0.4295
	Sox10(HMG)/SciaticNerve-Sox3-ChIP-Seq(GSE35132)/Homer	Sox10	shared	9	0.489
	Bcl6(Zf)/Liver-Bcl6-ChIP-Seq(GSE31578)/Homer	Bcl6	shared	9	0.4876
	Hoxc9(Homeobox)/Ainv15-Hoxc9-ChIP-Seq(GSE21812)/Homer	Hoxc9	shared	9	0.1933
	Lhx3(Homeobox)/Neuron-Lhx3-ChIP-Seq(GSE31456)/Homer	Lhx3	shared	9	0.4879
	MyoG(bHLH)/C2C12-MyoG-ChIP-Seq(GSE36024)/Homer	MyoG	shared	9	0.4035
	Ptf1a(bHLH)/Panc1-Ptf1a-ChIP-Seq(GSE47459)/Homer	Ptf1a	shared	9	0.7321
	Atf2(bZIP)/3T3L1-Atf2-ChIP-Seq(GSE56872)/Homer	Atf2	shared	9	0.1223
	Atf7(bZIP)/3T3L1-Atf7-ChIP-Seq(GSE56872)/Homer	Atf7	shared	9	0.1641
	p53(p53)/mES-cMyc-ChIP-Seq(GSE11431)/Homer	p53	shared	9	0.0159
	GATA(Zf),IR4/iTreg-Gata3-ChIP-Seq(GSE20898)/Homer	GATA	shared	9	0.0429
	Sox3(HMG)/NPC-Sox3-ChIP-Seq(GSE33059)/Homer	Sox3	shared	8	0.5078
	bZIP:IRF(bZIP,IRF)/Th17-BatF-ChIP-Seq(GSE39756)/Homer	bZIP:IRF	shared	8	0.1684
	Rfx1(HTH)/NPC-H3K4me1-ChIP-Seq(GSE16256)/Homer	Rfx1	shared	8	0.0938
	PAX3:FKHR-fusion(Paired,Homeobox)/Rh4-PAX3:FKHR-ChIP-Seq(GSE19063)/Homer	PAX3:FKHR-fusion	shared	8	0.0833
	LXH9(Homeobox)/Hct116-LXH9.V5-ChIP-Seq(GSE116822)/Homer	LXH9	shared	8	0.4418
	Gata6(Zf)/HUG1N-GATA6-ChIP-Seq(GSE51936)/Homer	Gata6	shared	8	0.3051
	Rfx6(HTH)/Min6b1-Rfx6.HA-ChIP-Seq(GSE62844)/Homer	Rfx6	shared	8	0.3931
	GSC(Homeobox)/FrogEmbryos-GSC-ChIP-Seq(DRA000576)/Homer	GSC	shared	8	0.3577
	MYB(HTH)/ERMYB-Myb-ChIPSeq(GSE22095)/Homer	MYB	shared	8	0.538
	Hoxa9(Homeobox)/ChickenMSG-Hoxa9.Flag-ChIP-Seq(GSE86088)/Homer	Hoxa9	shared	8	0.6852
	EBF1(EBF)/Near-E2A-ChIP-Seq(GSE21512)/Homer	EBF1	shared	8	0.4493
	Myf5(bHLH)/GM-Myf5-ChIP-Seq(GSE24852)/Homer	Myf5	shared	8	0.2824
	Bcl11a(Zf)/HSPC-BCL11A-ChIP-Seq(GSE104676)/Homer	Bcl11a	shared	8	0.2791
	ZNF416(Zf)/HEK293-ZNF416.GFP-ChIP-Seq(GSE58341)/Homer	ZNF416	shared	8	0.4883
	Tcf12(bHLH)/GM12878-Tcf12-ChIP-Seq(GSE32465)/Homer	Tcf12	shared	8	0.3815
	NFkB-p65(RHD)/GM12787-p65-ChIP-Seq(GSE19485)/Homer	NFkB-p65	shared	8	0.2272
	Maz(Zf)/HepG2-Maz-ChIP-Seq(GSE31477)/Homer	Maz	shared	8	0.4695
	MITF(bHLH)/MastCells-MITF-ChIP-Seq(GSE48085)/Homer	MITF	shared	8	0.3054
	HEB(bHLH)/mES-Heb-ChIP-Seq(GSE53233)/Homer	HEB	shared	8	0.6149
	RFX(HTH)/K562-RFX3-ChIP-Seq(SRA012198)/Homer	RFX	shared	8	0.0444
	MyoD(bHLH)/Myotube-MyoD-ChIP-Seq(GSE21614)/Homer	MyoD	shared	7	0.3145
	PU.1-IRF(ETS:IRF)/Bcell-PU.1-ChIP-Seq(GSE21512)/Homer	PU.1-IRF	shared	7	0.4576
	Rfx2(HTH)/LoVo-RFX2-ChIP-Seq(GSE49402)/Homer	Rfx2	shared	7	0.049
	NFkB-p65-Rel(RHD)/ThioMac-LPS-Expression(GSE23622)/Homer	NFkB-p65-Rel	shared	7	0.0357
	Erra(NR)/HepG2-Erra-ChIP-Seq(GSE31477)/Homer	Erra	shared	7	0.6296
	RXR(NR),DR1/3T3L1-RXR-ChIP-Seq(GSE13511)/Homer	RXR	shared	7	0.4309
	E2A(bHLH)/proBcell-E2A-ChIP-Seq(GSE21978)/Homer	E2A	shared	7	0.5186
	Ascl2(bHLH)/ESC-Ascl2-ChIP-Seq(GSE97712)/Homer	Ascl2	shared	7	0.4356
	IRF2(IRF)/Erythroblas-IRF2-ChIP-Seq(GSE36985)/Homer	IRF2	shared	7	0.0523
	X-box(HTH)/NPC-H3K4me1-ChIP-Seq(GSE16256)/Homer	X-box	shared	7	0.0545
	Stat3(Stat)/mES-Stat3-ChIP-Seq(GSE11431)/Homer	Stat3	shared	7	0.211
	NFAT:AP1(RHD,bZIP)/Jurkat-NFATC1-ChIP-Seq(Jolma_et_al.)/Homer	NFAT:AP1	shared	7	0.0822
	Gata4(Zf)/Heart-Gata4-ChIP-Seq(GSE35151)/Homer	Gata4	shared	7	0.3253
	SpiB(ETS)/OCILY3-SPIB-ChIP-Seq(GSE56857)/Homer	SpiB	shared	7	0.1093
	Ascl1(bHLH)/NeuralTubes-Ascl1-ChIP-Seq(GSE55840)/Homer	Ascl1	shared	7	0.5384
	Sox9(HMG)/Limb-SOX9-ChIP-Seq(GSE73225)/Homer	Sox9	shared	7	0.3029
	Sox4(HMG)/proB-Sox4-ChIP-Seq(GSE50066)/Homer	Sox4	shared	7	0.2871
	Otx2(Homeobox)/EpiLC-Otx2-ChIP-Seq(GSE56098)/Homer	Otx2	shared	7	0.2593
	Lhx2(Homeobox)/HFSC-Lhx2-ChIP-Seq(GSE48068)/Homer	Lhx2	shared	6	0.3448
	Zic(Zf)/Cerebellum-ZIC1.2-ChIP-Seq(GSE60731)/Homer	Zic	shared	6	0.3321
	ISRE(IRF)/ThioMac-LPS-Expression(GSE23622)/Homer	ISRE	shared	6	0.0339
	Six4(Homeobox)/MCF7-SIX4-ChIP-Seq(Encode)/Homer	Six4	shared	6	0.0281
	Sox6(HMG)/Myotubes-Sox6-ChIP-Seq(GSE32627)/Homer	Sox6	shared	6	0.4692
	Stat3+il21(Stat)/CD4-Stat3-ChIP-Seq(GSE19198)/Homer	Stat3+il21	shared	6	0.2762
	ZNF189(Zf)/HEK293-ZNF189.GFP-ChIP-Seq(GSE58341)/Homer	ZNF189	shared	6	0.3141
	Sox15(HMG)/CPA-Sox15-ChIP-Seq(GSE62909)/Homer	Sox15	shared	6	0.3451
	Hoxd10(Homeobox)/ChickenMSG-Hoxd10.Flag-ChIP-Seq(GSE86088)/Homer	Hoxd10	shared	6	0.3772
	STAT4(Stat)/CD4-Stat4-ChIP-Seq(GSE22104)/Homer	STAT4	shared	6	0.3494
	STAT5(Stat)/mCD4+-Stat5-ChIP-Seq(GSE12346)/Homer	STAT5	shared	6	0.1432
	Arnt:Ahr(bHLH)/MCF7-Arnt-ChIP-Seq(Lo_et_al.)/Homer	Arnt:Ahr	shared	6	0.2239
	NFY(CCAAT)/Promoter/Homer	NFY	shared	6	0.264
	TRPS1(Zf)/MCF7-TRPS1-ChIP-Seq(GSE107013)/Homer	TRPS1	shared	6	0.5417
	STAT1(Stat)/HelaS3-STAT1-ChIP-Seq(GSE12782)/Homer	STAT1	shared	6	0.1273
	BMAL1(bHLH)/Liver-Bmal1-ChIP-Seq(GSE39860)/Homer	BMAL1	shared	6	0.5056
	Tcf21(bHLH)/ArterySmoothMuscle-Tcf21-ChIP-Seq(GSE61369)/Homer	Tcf21	shared	6	0.3613
	Smad2(MAD)/ES-SMAD2-ChIP-Seq(GSE29422)/Homer	Smad2	shared	6	0.4879
	Mef2b(MADS)/HEK293-Mef2b.V5-ChIP-Seq(GSE67450)/Homer	Mef2b	shared	6	0.2809
	Oct2(POU,Homeobox)/Bcell-Oct2-ChIP-Seq(GSE21512)/Homer	2020-10-02	shared	6	0.1132
	BMYB(HTH)/Hela-BMYB-ChIP-Seq(GSE27030)/Homer	BMYB	shared	6	0.4677
	GATA3(Zf),DR4/iTreg-Gata3-ChIP-Seq(GSE20898)/Homer	GATA3	shared	6	0.0368
	LEF1(HMG)/H1-LEF1-ChIP-Seq(GSE64758)/Homer	LEF1	shared	5	0.2423
	Pdx1(Homeobox)/Islet-Pdx1-ChIP-Seq(SRA008281)/Homer	Pdx1	shared	5	0.3145
	JunD(bZIP)/K562-JunD-ChIP-Seq/Homer	JunD	shared	5	0.0361
	Sox2(HMG)/mES-Sox2-ChIP-Seq(GSE11431)/Homer	Sox2	shared	5	0.2935
	Atoh1(bHLH)/Cerebellum-Atoh1-ChIP-Seq(GSE22111)/Homer	Atoh1	shared	5	0.3952
	AMYB(HTH)/Testes-AMYB-ChIP-Seq(GSE44588)/Homer	AMYB	shared	5	0.4753
	THRb(NR)/Liver-NR1A2-ChIP-Seq(GSE52613)/Homer	THRb	shared	5	0.8489
	GATA3(Zf)/iTreg-Gata3-ChIP-Seq(GSE20898)/Homer	GATA3	shared	5	0.4374
	STAT6(Stat)/Macrophage-Stat6-ChIP-Seq(GSE38377)/Homer	STAT6	shared	5	0.2175
	GLIS3(Zf)/Thyroid-Glis3.GFP-ChIP-Seq(GSE103297)/Homer	GLIS3	shared	5	0.5164
	IRF1(IRF)/PBMC-IRF1-ChIP-Seq(GSE43036)/Homer	IRF1	shared	5	0.0638
	Brn1(POU,Homeobox)/NPC-Brn1-ChIP-Seq(GSE35496)/Homer	Brn1	shared	5	0.1103
	Hoxa10(Homeobox)/ChickenMSG-Hoxa10.Flag-ChIP-Seq(GSE86088)/Homer	Hoxa10	shared	5	0.2135
	Smad4(MAD)/ESC-SMAD4-ChIP-Seq(GSE29422)/Homer	Smad4	shared	5	0.493
	Unknown-ESC-element(?)/mES-Nanog-ChIP-Seq(GSE11724)/Homer	Unknown-ESC-element	shared	5	0.2604
	Oct4(POU,Homeobox)/mES-Oct4-ChIP-Seq(GSE11431)/Homer	2020-10-04	shared	5	0.1655
	Pax8(Paired,Homeobox)/Thyroid-Pax8-ChIP-Seq(GSE26938)/Homer	Pax8	shared	5	0.1399
	GATA(Zf),IR3/iTreg-Gata3-ChIP-Seq(GSE20898)/Homer	GATA	shared	5	0.0599
	Prop1(Homeobox)/GHFT1-PROP1.biotin-ChIP-Seq(GSE77302)/Homer	Prop1	shared	5	0.2229
	CHR(?)/Hela-CellCycle-Expression/Homer	CHR	shared	5	0.2398
	ZFX(Zf)/mES-Zfx-ChIP-Seq(GSE11431)/Homer	ZFX	shared	5	0.4811
	Cdx2(Homeobox)/mES-Cdx2-ChIP-Seq(GSE14586)/Homer	Cdx2	shared	5	0.2348
	Olig2(bHLH)/Neuron-Olig2-ChIP-Seq(GSE30882)/Homer	Olig2	shared	5	0.5712
	E2A(bHLH),near_PU.1/Bcell-PU.1-ChIP-Seq(GSE21512)/Homer	E2A	shared	5	0.5139
	Rbpj1(?)/Panc1-Rbpj1-ChIP-Seq(GSE47459)/Homer	Rbpj1	shared	5	0.4966
	NFAT(RHD)/Jurkat-NFATC1-ChIP-Seq(Jolma_et_al.)/Homer	NFAT	shared	5	0.3228
	Meis1(Homeobox)/MastCells-Meis1-ChIP-Seq(GSE48085)/Homer	Meis1	shared	5	0.5027
	Oct11(POU,Homeobox)/NCIH1048-POU2F3-ChIP-seq(GSE115123)/Homer	2020-10-11	shared	5	0.1183
	Gata2(Zf)/K562-GATA2-ChIP-Seq(GSE18829)/Homer	Gata2	shared	5	0.2211
	PU.1:IRF8(ETS:IRF)/pDC-Irf8-ChIP-Seq(GSE66899)/Homer	PU.1:IRF8	shared	5	0.0855
	PPARa(NR),DR1/Liver-Ppara-ChIP-Seq(GSE47954)/Homer	PPARa	shared	5	0.3837
	Bapx1(Homeobox)/VertebralCol-Bapx1-ChIP-Seq(GSE36672)/Homer	Bapx1	shared	5	0.5867
	OCT:OCT-short(POU,Homeobox)/NPC-OCT6-ChIP-Seq(GSE43916)/Homer	OCT:OCT-short	shared	4	0.2416
	RORa(NR)/Liver-Rora-ChIP-Seq(GSE101115)/Homer	RORa	shared	4	0.0599
	Znf263(Zf)/K562-Znf263-ChIP-Seq(GSE31477)/Homer	Znf263	shared	4	0.5921
	RORgt(NR)/EL4-RORgt.Flag-ChIP-Seq(GSE56019)/Homer	RORgt	shared	4	0.0527
	RORgt(NR)/EL4-RORgt.Flag-ChIP-Seq(GSE56019)/Homer	RORgt	shared	4	0.0527
	STAT6(Stat)/CD4-Stat6-ChIP-Seq(GSE22104)/Homer	STAT6	shared	4	0.2113
	COUP-TFII(NR)/Artia-Nr2f2-ChIP-Seq(GSE46497)/Homer	COUP-TFII	shared	4	0.5179
	PGR(NR)/EndoStromal-PGR-ChIP-Seq(GSE69539)/Homer	PGR	shared	4	0.0876
	HNF1b(Homeobox)/PDAC-HNF1B-ChIP-Seq(GSE64557)/Homer	HNF1b	shared	4	0.0631
	PAX5(Paired,Homeobox)/GM12878-PAX5-ChIP-Seq(GSE32465)/Homer	PAX5	shared	4	0.1479
	Zic3(Zf)/mES-Zic3-ChIP-Seq(GSE37889)/Homer	Zic3	shared	4	0.2798
	RORg(NR)/Liver-Rorc-ChIP-Seq(GSE101115)/Homer	RORg	shared	4	0.0393
	Oct6(POU,Homeobox)/NPC-Pou3f1-ChIP-Seq(GSE35496)/Homer	2020-10-06	shared	4	0.1453
	ZNF711(Zf)/SHSY5Y-ZNF711-ChIP-Seq(GSE20673)/Homer	ZNF711	shared	4	0.5781
	Pit1(Homeobox)/GCrat-Pit1-ChIP-Seq(GSE58009)/Homer	Pit1	shared	4	0.3098
	Gata1(Zf)/K562-GATA1-ChIP-Seq(GSE18829)/Homer	Gata1	shared	4	0.1983
	ZEB1(Zf)/PDAC-ZEB1-ChIP-Seq(GSE64557)/Homer	ZEB1	shared	4	0.577
	Nkx2.2(Homeobox)/NPC-Nkx2.2-ChIP-Seq(GSE61673)/Homer	Nkx2.2	shared	4	0.573
	Twist2(bHLH)/Myoblast-Twist2.Ty1-ChIP-Seq(GSE127998)/Homer	Twist2	shared	4	0.5417
	PPARE(NR),DR1/3T3L1-Pparg-ChIP-Seq(GSE13511)/Homer	PPARE	shared	4	0.3595
	Hnf1(Homeobox)/Liver-Foxa2-Chip-Seq(GSE25694)/Homer	Hnf1	shared	4	0.0584
	Zac1(Zf)/Neuro2A-Plagl1-ChIP-Seq(GSE75942)/Homer	Zac1	shared	4	0.736
	ZBTB12(Zf)/HEK293-ZBTB12.GFP-ChIP-Seq(GSE58341)/Homer	ZBTB12	shared	4	0.1547
	NPAS(bHLH)/Liver-NPAS-ChIP-Seq(GSE39860)/Homer	NPAS	shared	4	0.4551
	WT1(Zf)/Kidney-WT1-ChIP-Seq(GSE90016)/Homer	WT1	shared	4	0.2524
	Tcf3(HMG)/mES-Tcf3-ChIP-Seq(GSE11724)/Homer	Tcf3	shared	4	0.0999
	Nkx2.1(Homeobox)/LungAC-Nkx2.1-ChIP-Seq(GSE43252)/Homer	Nkx2.1	shared	4	0.7173
	EBF(EBF)/proBcell-EBF-ChIP-Seq(GSE21978)/Homer	EBF	shared	4	0.1107
	NeuroD1(bHLH)/Islet-NeuroD1-ChIP-Seq(GSE30298)/Homer	NeuroD1	shared	4	0.3051
	ZNF341(Zf)/EBV-ZNF341-ChIP-Seq(GSE113194)/Homer	ZNF341	shared	4	0.2676
	Mef2a(MADS)/HL1-Mef2a.biotin-ChIP-Seq(GSE21529)/Homer	Mef2a	shared	4	0.1507
	NeuroG2(bHLH)/Fibroblast-NeuroG2-ChIP-Seq(GSE75910)/Homer	NeuroG2	shared	4	0.4908
	CRE(bZIP)/Promoter/Homer	CRE	shared	3	0.0804
	Pitx1:Ebox(Homeobox,bHLH)/Hindlimb-Pitx1-ChIP-Seq(GSE41591)/Homer	Pitx1:Ebox	shared	3	0.0768
	HIF-1b(HLH)/T47D-HIF1b-ChIP-Seq(GSE59937)/Homer	HIF-1b	shared	3	0.3462
	Zfp809(Zf)/ES-Zfp809-ChIP-Seq(GSE70799)/Homer	Zfp809	shared	3	0.1212
	Lhx1(Homeobox)/EmbryoCarcinoma-Lhx1-ChIP-Seq(GSE70957)/Homer	Lhx1	shared	3	0.3516
	Tbr1(T-box)/Cortex-Tbr1-ChIP-Seq(GSE71384)/Homer	Tbr1	shared	3	0.427
	RARa(NR)/K562-RARa-ChIP-Seq(Encode)/Homer	RARa	shared	3	0.7028
	Pit1+1bp(Homeobox)/GCrat-Pit1-ChIP-Seq(GSE58009)/Homer	Pit1+1bp	shared	3	0.1298
	ZNF322(Zf)/HEK293-ZNF322.GFP-ChIP-Seq(GSE58341)/Homer	ZNF322	shared	3	0.1331
	TCF4(bHLH)/SHSY5Y-TCF4-ChIP-Seq(GSE96915)/Homer	TCF4	shared	3	0.4865
	SCRT1(Zf)/HEK293-SCRT1.eGFP-ChIP-Seq(Encode)/Homer	SCRT1	shared	3	0.1197
	ZNF467(Zf)/HEK293-ZNF467.GFP-ChIP-Seq(GSE58341)/Homer	ZNF467	shared	3	0.3498
	NPAS2(bHLH)/Liver-NPAS2-ChIP-Seq(GSE39860)/Homer	NPAS2	shared	3	0.348
	RBPJ:Ebox(?,bHLH)/Panc1-Rbpj1-ChIP-Seq(GSE47459)/Homer	RBPJ:Ebox	shared	3	0.1475
	Mef2c(MADS)/GM12878-Mef2c-ChIP-Seq(GSE32465)/Homer	Mef2c	shared	3	0.1551
	PSE(SNAPc)/K562-mStart-Seq/Homer	PSE	shared	3	0.1735
	Sox17(HMG)/Endoderm-Sox17-ChIP-Seq(GSE61475)/Homer	Sox17	shared	3	0.2297
	BHLHA15(bHLH)/NIH3T3-BHLHB8.HA-ChIP-Seq(GSE119782)/Homer	BHLHA15	shared	3	0.4573
	Egr2(Zf)/Thymocytes-Egr2-ChIP-Seq(GSE34254)/Homer	Egr2	shared	3	0.0804
	Egr1(Zf)/K562-Egr1-ChIP-Seq(GSE32465)/Homer	Egr1	shared	3	0.2654
	Nkx3.1(Homeobox)/LNCaP-Nkx3.1-ChIP-Seq(GSE28264)/Homer	Nkx3.1	shared	3	0.6159
	MafF(bZIP)/HepG2-MafF-ChIP-Seq(GSE31477)/Homer	MafF	shared	3	0.1042
	ZEB2(Zf)/SNU398-ZEB2-ChIP-Seq(GSE103048)/Homer	ZEB2	shared	3	0.3787
	PRDM10(Zf)/HEK293-PRDM10.eGFP-ChIP-Seq(Encode)/Homer	PRDM10	shared	3	0.2236
	ZNF7(Zf)/HepG2-ZNF7.Flag-ChIP-Seq(Encode)/Homer	ZNF7	shared	3	0.1882
	LXRE(NR),DR4/RAW-LXRb.biotin-ChIP-Seq(GSE21512)/Homer	LXRE	shared	3	0.0209
	EBF2(EBF)/BrownAdipose-EBF2-ChIP-Seq(GSE97114)/Homer	EBF2	shared	3	0.3707
	Usf2(bHLH)/C2C12-Usf2-ChIP-Seq(GSE36030)/Homer	Usf2	shared	3	0.106
	THRb(NR)/HepG2-THRb.Flag-ChIP-Seq(Encode)/Homer	THRb	shared	3	0.2355
	Foxh1(Forkhead)/hESC-FOXH1-ChIP-Seq(GSE29422)/Homer	Foxh1	shared	3	0.2045
	Reverb(NR),DR2/RAW-Reverba.biotin-ChIP-Seq(GSE45914)/Homer	Reverb	shared	3	0.0602
	Tcf7(HMG)/GM12878-TCF7-ChIP-Seq(Encode)/Homer	Tcf7	shared	3	0.1201
	CEBP:CEBP(bZIP)/MEF-Chop-ChIP-Seq(GSE35681)/Homer	CEBP:CEBP	shared	3	0.0566
	Dlx3(Homeobox)/Kerainocytes-Dlx3-ChIP-Seq(GSE89884)/Homer	Dlx3	shared	3	0.2265
	MNT(bHLH)/HepG2-MNT-ChIP-Seq(Encode)/Homer	MNT	shared	2	0.3098
	CArG(MADS)/PUER-Srf-ChIP-Seq(Sullivan_et_al.)/Homer	CArG	shared	2	0.1093
	Hoxb4(Homeobox)/ES-Hoxb4-ChIP-Seq(GSE34014)/Homer	Hoxb4	shared	2	0.0685
	IRF:BATF(IRF:bZIP)/pDC-Irf8-ChIP-Seq(GSE66899)/Homer	IRF:BATF	shared	2	0.0483
	Nur77(NR)/K562-NR4A1-ChIP-Seq(GSE31363)/Homer	Nur77	shared	2	0.07
	Nkx2.5(Homeobox)/HL1-Nkx2.5.biotin-ChIP-Seq(GSE21529)/Homer	Nkx2.5	shared	2	0.6091
	Hand2(bHLH)/Mesoderm-Hand2-ChIP-Seq(GSE61475)/Homer	Hand2	shared	2	0.1789
	Brachyury(T-box)/Mesoendoderm-Brachyury-ChIP-exo(GSE54963)/Homer	Brachyury	shared	2	0.0902
	ZNF317(Zf)/HEK293-ZNF317.GFP-ChIP-Seq(GSE58341)/Homer	ZNF317	shared	2	0.0361
	Eomes(T-box)/H9-Eomes-ChIP-Seq(GSE26097)/Homer	Eomes	shared	2	0.5824
	bHLHE41(bHLH)/proB-Bhlhe41-ChIP-Seq(GSE93764)/Homer	bHLHE41	shared	2	0.3494
	ZNF675(Zf)/HEK293-ZNF675.GFP-ChIP-Seq(GSE58341)/Homer	ZNF675	shared	2	0.0577
	ZNF136(Zf)/HEK293-ZNF136.GFP-ChIP-Seq(GSE58341)/Homer	ZNF136	shared	2	0.0346
	USF1(bHLH)/GM12878-Usf1-ChIP-Seq(GSE32465)/Homer	USF1	shared	2	0.1569
	ZNF652/HepG2-ZNF652.Flag-ChIP-Seq(Encode)/Homer	ZNF652	shared	2	0.0923
	NF1:FOXA1(CTF,Forkhead)/LNCAP-FOXA1-ChIP-Seq(GSE27824)/Homer	NF1:FOXA1	shared	2	0.0213
	GATA3(Zf),DR8/iTreg-Gata3-ChIP-Seq(GSE20898)/Homer	GATA3	shared	2	0.0278
	Unknown(Homeobox)/Limb-p300-ChIP-Seq/Homer	Unknown	shared	2	0.2102
	HNF4a(NR),DR1/HepG2-HNF4a-ChIP-Seq(GSE25021)/Homer	HNF4a	shared	2	0.1666
	COUP-TFII(NR)/K562-NR2F1-ChIP-Seq(Encode)/Homer	COUP-TFII	shared	2	0.4439
	n-Myc(bHLH)/mES-nMyc-ChIP-Seq(GSE11431)/Homer	n-Myc	shared	2	0.2326
	Tbx20(T-box)/Heart-Tbx20-ChIP-Seq(GSE29636)/Homer	Tbx20	shared	2	0.0808
	E2F7(E2F)/Hela-E2F7-ChIP-Seq(GSE32673)/Homer	E2F7	shared	2	0.053
	MYNN(Zf)/HEK293-MYNN.eGFP-ChIP-Seq(Encode)/Homer	MYNN	shared	2	0.0912
	ARE(NR)/LNCAP-AR-ChIP-Seq(GSE27824)/Homer	ARE	shared	2	0.088
