# Supplementary material for: Subtype-associated epigenomic landscape and 3D genome structure in bladder cancer
Source: Genome Biol. 2021 Apr 15;22:105. doi: 10.1186/s13059-021-02325-y (PMC8048365; doi:10.1186/s13059-021-02325-y)
Supplement: Supplementary file 12 — Additional file 12: Table S11. FOXA1 and GATA3 ChIP-Seq peaks called in RT4 cells. [file 13059_2021_2325_MOESM12_ESM.xlsx]

## Sheet: Table S11-RT4 FOXA1 & GATA3
Supplementary Table S11: FOXA1 and GATA3 ChIP-Seq peaks called in RT4 cells
	Cell Line	TF ChIP-Seq	Total Peaks
	RT4	FOXA1	80019
	RT4	GATA3	16331
	RT4 FOXA1 TF ChIP-Seq Peaks					RT4 GATA3 TF ChIP-Seq Peaks
	chr	start	end	ID		chr	start	end	ID
	chr1	842607	842772	RT4_FOXA1_1		chr1	820925	821465	RT4_GATA3_1_1
	chr1	859245	859570	RT4_FOXA1_2		chr1	1707012	1707534	RT4_GATA3_1_2
	chr1	864400	864750	RT4_FOXA1_3		chr1	1814757	1815290	RT4_GATA3_1_3
	chr1	868467	868721	RT4_FOXA1_4		chr1	2462263	2462848	RT4_GATA3_1_4
	chr1	875585	876033	RT4_FOXA1_5		chr1	3619804	3620393	RT4_GATA3_1_5
	chr1	896441	896623	RT4_FOXA1_6		chr1	3633769	3634374	RT4_GATA3_1_6
	chr1	906726	907211	RT4_FOXA1_7		chr1	3735285	3735817	RT4_GATA3_1_7
	chr1	919822	920131	RT4_FOXA1_8		chr1	5748430	5749025	RT4_GATA3_1_8
	chr1	933536	934322	RT4_FOXA1_9		chr1	6419707	6420316	RT4_GATA3_1_9
	chr1	935999	936369	RT4_FOXA1_10		chr1	6490976	6491621	RT4_GATA3_1_10
	chr1	955066	955732	RT4_FOXA1_11		chr1	6860719	6861292	RT4_GATA3_1_11
	chr1	975770	975944	RT4_FOXA1_12		chr1	7394645	7395211	RT4_GATA3_1_12
	chr1	984968	985201	RT4_FOXA1_13		chr1	7599606	7600165	RT4_GATA3_1_13
	chr1	991630	991855	RT4_FOXA1_14		chr1	8074905	8075540	RT4_GATA3_1_14
	chr1	1051457	1052091	RT4_FOXA1_15		chr1	8118405	8119019	RT4_GATA3_1_15
	chr1	1060201	1060488	RT4_FOXA1_16		chr1	8137976	8138574	RT4_GATA3_1_16
	chr1	1072035	1072334	RT4_FOXA1_17		chr1	8207067	8207636	RT4_GATA3_1_17
	chr1	1141589	1141891	RT4_FOXA1_18		chr1	8242366	8242973	RT4_GATA3_1_18
	chr1	1158244	1158584	RT4_FOXA1_19		chr1	8726558	8726954	RT4_GATA3_1_19
	chr1	1167731	1168297	RT4_FOXA1_20		chr1	8730234	8731101	RT4_GATA3_1_20
	chr1	1226915	1227496	RT4_FOXA1_21		chr1	9240280	9240776	RT4_GATA3_1_21
	chr1	1232187	1232397	RT4_FOXA1_22		chr1	9466119	9466688	RT4_GATA3_1_22
	chr1	1241843	1242390	RT4_FOXA1_23		chr1	10143025	10143618	RT4_GATA3_1_23
	chr1	1243259	1243646	RT4_FOXA1_24		chr1	10231131	10231750	RT4_GATA3_1_24
	chr1	1243721	1244511	RT4_FOXA1_25		chr1	10290695	10291214	RT4_GATA3_1_25
	chr1	1276682	1277071	RT4_FOXA1_26		chr1	10574583	10575186	RT4_GATA3_1_26
	chr1	1284662	1285297	RT4_FOXA1_27		chr1	10864158	10864757	RT4_GATA3_1_27
	chr1	1290108	1290625	RT4_FOXA1_28		chr1	10952167	10952701	RT4_GATA3_1_28
	chr1	1356406	1356903	RT4_FOXA1_29		chr1	10960135	10960722	RT4_GATA3_1_29
	chr1	1359213	1359460	RT4_FOXA1_30		chr1	12291294	12291867	RT4_GATA3_1_30
	chr1	1365094	1365400	RT4_FOXA1_31		chr1	12805151	12805680	RT4_GATA3_1_31
	chr1	1369816	1370100	RT4_FOXA1_32		chr1	14107678	14108228	RT4_GATA3_1_32
	chr1	1370825	1371212	RT4_FOXA1_33		chr1	14127564	14128095	RT4_GATA3_1_33
	chr1	1440225	1440522	RT4_FOXA1_34		chr1	14647598	14648035	RT4_GATA3_1_34
	chr1	1474221	1474548	RT4_FOXA1_35		chr1	14806264	14806856	RT4_GATA3_1_35
	chr1	1475486	1475708	RT4_FOXA1_36		chr1	15528084	15528622	RT4_GATA3_1_36
	chr1	1499675	1499905	RT4_FOXA1_37		chr1	15532909	15533514	RT4_GATA3_1_37
	chr1	1617707	1618178	RT4_FOXA1_38		chr1	15733033	15733558	RT4_GATA3_1_38
	chr1	1694522	1695114	RT4_FOXA1_39		chr1	15738521	15739106	RT4_GATA3_1_39
	chr1	1709619	1710084	RT4_FOXA1_40		chr1	15743841	15744421	RT4_GATA3_1_40
	chr1	1713842	1714243	RT4_FOXA1_41		chr1	16176441	16177079	RT4_GATA3_1_41
	chr1	1760084	1760478	RT4_FOXA1_42		chr1	16892358	16893941	RT4_GATA3_1_42
	chr1	1790154	1790540	RT4_FOXA1_43		chr1	17043037	17043535	RT4_GATA3_1_43
	chr1	1791422	1791690	RT4_FOXA1_44		chr1	17236227	17236780	RT4_GATA3_1_44
	chr1	1791898	1792119	RT4_FOXA1_45		chr1	17638724	17639488	RT4_GATA3_1_45
	chr1	1813764	1813968	RT4_FOXA1_46		chr1	17674496	17675464	RT4_GATA3_1_46
	chr1	1821661	1822265	RT4_FOXA1_47		chr1	17802175	17802744	RT4_GATA3_1_47
	chr1	1822411	1822847	RT4_FOXA1_48		chr1	17886231	17886731	RT4_GATA3_1_48
	chr1	1902541	1902771	RT4_FOXA1_49		chr1	18615427	18615930	RT4_GATA3_1_49
	chr1	1912765	1913229	RT4_FOXA1_50		chr1	19123387	19123905	RT4_GATA3_1_50
	chr1	1933340	1933763	RT4_FOXA1_51		chr1	19229457	19230035	RT4_GATA3_1_51
	chr1	1975438	1975732	RT4_FOXA1_52		chr1	19261940	19262631	RT4_GATA3_1_52
	chr1	2100649	2101114	RT4_FOXA1_53		chr1	19298923	19299495	RT4_GATA3_1_53
	chr1	2104265	2104576	RT4_FOXA1_54		chr1	19519346	19520131	RT4_GATA3_1_54
	chr1	2111698	2112094	RT4_FOXA1_55		chr1	19966387	19966953	RT4_GATA3_1_55
	chr1	2136776	2137271	RT4_FOXA1_56		chr1	20301260	20301872	RT4_GATA3_1_56
	chr1	2139236	2139679	RT4_FOXA1_57		chr1	20464929	20465894	RT4_GATA3_1_57
	chr1	2158997	2159431	RT4_FOXA1_58		chr1	20558945	20559476	RT4_GATA3_1_58
	chr1	2189427	2189657	RT4_FOXA1_59		chr1	20802547	20803107	RT4_GATA3_1_59
	chr1	2189816	2190062	RT4_FOXA1_60		chr1	20865028	20865610	RT4_GATA3_1_60
	chr1	2279959	2280419	RT4_FOXA1_61		chr1	21291276	21291791	RT4_GATA3_1_61
	chr1	2323264	2323610	RT4_FOXA1_62		chr1	21390479	21391021	RT4_GATA3_1_62
	chr1	2362341	2362979	RT4_FOXA1_63		chr1	21958574	21959132	RT4_GATA3_1_63
	chr1	2412354	2412615	RT4_FOXA1_64		chr1	22283443	22284031	RT4_GATA3_1_64
	chr1	2415199	2415604	RT4_FOXA1_65		chr1	22352280	22352856	RT4_GATA3_1_65
	chr1	2472884	2473078	RT4_FOXA1_66		chr1	22357553	22358072	RT4_GATA3_1_66
	chr1	2479974	2480432	RT4_FOXA1_67		chr1	22369494	22370100	RT4_GATA3_1_67
	chr1	2507444	2507710	RT4_FOXA1_68		chr1	22396029	22396551	RT4_GATA3_1_68
	chr1	2706462	2706873	RT4_FOXA1_69		chr1	23156650	23157223	RT4_GATA3_1_69
	chr1	2984667	2985343	RT4_FOXA1_70		chr1	23778398	23779025	RT4_GATA3_1_70
	chr1	2986108	2986567	RT4_FOXA1_71		chr1	23866221	23866835	RT4_GATA3_1_71
	chr1	2987112	2987696	RT4_FOXA1_72		chr1	23911967	23912447	RT4_GATA3_1_72
	chr1	3030579	3031193	RT4_FOXA1_73		chr1	24046986	24047411	RT4_GATA3_1_73
	chr1	3034364	3034890	RT4_FOXA1_74		chr1	24234523	24235125	RT4_GATA3_1_74
	chr1	3128181	3128512	RT4_FOXA1_75		chr1	24525846	24526255	RT4_GATA3_1_75
	chr1	3164195	3164503	RT4_FOXA1_76		chr1	24563156	24563783	RT4_GATA3_1_76
	chr1	3194166	3194490	RT4_FOXA1_77		chr1	24592958	24593606	RT4_GATA3_1_77
	chr1	3237741	3238196	RT4_FOXA1_78		chr1	24610278	24610784	RT4_GATA3_1_78
	chr1	3238735	3238957	RT4_FOXA1_79		chr1	24619865	24620375	RT4_GATA3_1_79
	chr1	3252051	3252407	RT4_FOXA1_80		chr1	24701305	24701831	RT4_GATA3_1_80
	chr1	3282358	3282751	RT4_FOXA1_81		chr1	24885501	24885982	RT4_GATA3_1_81
	chr1	3297095	3297363	RT4_FOXA1_82		chr1	25019138	25019735	RT4_GATA3_1_82
	chr1	3326346	3326941	RT4_FOXA1_83		chr1	25559465	25560064	RT4_GATA3_1_83
	chr1	3447931	3448531	RT4_FOXA1_84		chr1	25580271	25580842	RT4_GATA3_1_84
	chr1	3503741	3504253	RT4_FOXA1_85		chr1	26448284	26448844	RT4_GATA3_1_85
	chr1	3541150	3541914	RT4_FOXA1_86		chr1	26500791	26501744	RT4_GATA3_1_86
	chr1	3568985	3569250	RT4_FOXA1_87		chr1	26504462	26504976	RT4_GATA3_1_87
	chr1	3628286	3628623	RT4_FOXA1_88		chr1	26624627	26625197	RT4_GATA3_1_88
	chr1	3633556	3634247	RT4_FOXA1_89		chr1	27313188	27313691	RT4_GATA3_1_89
	chr1	3692401	3692762	RT4_FOXA1_90		chr1	27468087	27468679	RT4_GATA3_1_90
	chr1	3748136	3748424	RT4_FOXA1_91		chr1	27492816	27493407	RT4_GATA3_1_91
	chr1	3781457	3781799	RT4_FOXA1_92		chr1	27826396	27826981	RT4_GATA3_1_92
	chr1	5068731	5068905	RT4_FOXA1_93		chr1	27869088	27869669	RT4_GATA3_1_93
	chr1	5560601	5560900	RT4_FOXA1_94		chr1	28022132	28022714	RT4_GATA3_1_94
	chr1	5748385	5749110	RT4_FOXA1_95		chr1	28441641	28442224	RT4_GATA3_1_95
	chr1	5753266	5753512	RT4_FOXA1_96		chr1	28496461	28497007	RT4_GATA3_1_96
	chr1	6009070	6009560	RT4_FOXA1_97		chr1	28562955	28563571	RT4_GATA3_1_97
	chr1	6090466	6090679	RT4_FOXA1_98		chr1	28610133	28610653	RT4_GATA3_1_98
	chr1	6119173	6119442	RT4_FOXA1_99		chr1	28678679	28679230	RT4_GATA3_1_99
	chr1	6217885	6218178	RT4_FOXA1_100		chr1	28743804	28744406	RT4_GATA3_1_100
	chr1	6239492	6239732	RT4_FOXA1_101		chr1	28768074	28768488	RT4_GATA3_1_101
	chr1	6264615	6264943	RT4_FOXA1_102		chr1	28880598	28881267	RT4_GATA3_1_102
	chr1	6268787	6269552	RT4_FOXA1_103		chr1	28925518	28926101	RT4_GATA3_1_103
	chr1	6302223	6302481	RT4_FOXA1_104		chr1	28974079	28974621	RT4_GATA3_1_104
	chr1	6321235	6321473	RT4_FOXA1_105		chr1	28994686	28995183	RT4_GATA3_1_105
	chr1	6408248	6408492	RT4_FOXA1_106		chr1	29291071	29291624	RT4_GATA3_1_106
	chr1	6417882	6418395	RT4_FOXA1_107		chr1	29319882	29320460	RT4_GATA3_1_107
	chr1	6421722	6421959	RT4_FOXA1_108		chr1	29570564	29571151	RT4_GATA3_1_108
	chr1	6452974	6453950	RT4_FOXA1_109		chr1	29593348	29593989	RT4_GATA3_1_109
	chr1	6457102	6457475	RT4_FOXA1_110		chr1	29713518	29714263	RT4_GATA3_1_110
	chr1	6470263	6470953	RT4_FOXA1_111		chr1	30324323	30324902	RT4_GATA3_1_111
	chr1	6472998	6473210	RT4_FOXA1_112		chr1	30446848	30447500	RT4_GATA3_1_112
	chr1	6474604	6474934	RT4_FOXA1_113		chr1	30479012	30479505	RT4_GATA3_1_113
	chr1	6475729	6475943	RT4_FOXA1_114		chr1	30485181	30485769	RT4_GATA3_1_114
	chr1	6480776	6480961	RT4_FOXA1_115		chr1	30665873	30666486	RT4_GATA3_1_115
	chr1	6500790	6501182	RT4_FOXA1_116		chr1	30891831	30892390	RT4_GATA3_1_116
	chr1	6535523	6535744	RT4_FOXA1_117		chr1	31091031	31091644	RT4_GATA3_1_117
	chr1	6662845	6663259	RT4_FOXA1_118		chr1	31111332	31111943	RT4_GATA3_1_118
	chr1	6669847	6670058	RT4_FOXA1_119		chr1	31210604	31211453	RT4_GATA3_1_119
	chr1	6673410	6673675	RT4_FOXA1_120		chr1	31219236	31219824	RT4_GATA3_1_120
	chr1	6798950	6799385	RT4_FOXA1_121		chr1	31390433	31390984	RT4_GATA3_1_121
	chr1	6844482	6845051	RT4_FOXA1_122		chr1	31606212	31606772	RT4_GATA3_1_122
	chr1	6850335	6850761	RT4_FOXA1_123		chr1	31657643	31658237	RT4_GATA3_1_123
	chr1	6855931	6856312	RT4_FOXA1_124		chr1	31809780	31810370	RT4_GATA3_1_124
	chr1	6882548	6883038	RT4_FOXA1_125		chr1	31863081	31864047	RT4_GATA3_1_125
	chr1	6959462	6960077	RT4_FOXA1_126		chr1	31944313	31944892	RT4_GATA3_1_126
	chr1	7161863	7162165	RT4_FOXA1_127		chr1	31949626	31950252	RT4_GATA3_1_127
	chr1	7163662	7164563	RT4_FOXA1_128		chr1	31976607	31977128	RT4_GATA3_1_128
	chr1	7507225	7507532	RT4_FOXA1_129		chr1	31977291	31977860	RT4_GATA3_1_129
	chr1	7707213	7707590	RT4_FOXA1_130		chr1	32014513	32015174	RT4_GATA3_1_130
	chr1	7714459	7715484	RT4_FOXA1_131		chr1	32116573	32117064	RT4_GATA3_1_131
	chr1	7723246	7723526	RT4_FOXA1_132		chr1	32234659	32235230	RT4_GATA3_1_132
	chr1	7740285	7741244	RT4_FOXA1_133		chr1	32240130	32240678	RT4_GATA3_1_133
	chr1	7764849	7765726	RT4_FOXA1_134		chr1	32345655	32346903	RT4_GATA3_1_134
	chr1	7777546	7778289	RT4_FOXA1_135		chr1	32362957	32363546	RT4_GATA3_1_135
	chr1	7844068	7844586	RT4_FOXA1_136		chr1	32390398	32390988	RT4_GATA3_1_136
	chr1	7992509	7992938	RT4_FOXA1_137		chr1	32421460	32422034	RT4_GATA3_1_137
	chr1	8063281	8063781	RT4_FOXA1_138		chr1	32423258	32423833	RT4_GATA3_1_138
	chr1	8064805	8065705	RT4_FOXA1_139		chr1	32604481	32605049	RT4_GATA3_1_139
	chr1	8077557	8077850	RT4_FOXA1_140		chr1	33115739	33116427	RT4_GATA3_1_140
	chr1	8080416	8080797	RT4_FOXA1_141		chr1	33173120	33173668	RT4_GATA3_1_141
	chr1	8083340	8083596	RT4_FOXA1_142		chr1	33190632	33191175	RT4_GATA3_1_142
	chr1	8091248	8092012	RT4_FOXA1_143		chr1	33203211	33203812	RT4_GATA3_1_143
	chr1	8100733	8100934	RT4_FOXA1_144		chr1	33222912	33223495	RT4_GATA3_1_144
	chr1	8105778	8106428	RT4_FOXA1_145		chr1	33246009	33246709	RT4_GATA3_1_145
	chr1	8109043	8109231	RT4_FOXA1_146		chr1	33399349	33400088	RT4_GATA3_1_146
	chr1	8113944	8114429	RT4_FOXA1_147		chr1	33423128	33423728	RT4_GATA3_1_147
	chr1	8118312	8118930	RT4_FOXA1_148		chr1	33471393	33471800	RT4_GATA3_1_148
	chr1	8121281	8122515	RT4_FOXA1_149		chr1	33473339	33474468	RT4_GATA3_1_149
	chr1	8130220	8130569	RT4_FOXA1_150		chr1	33513190	33514084	RT4_GATA3_1_150
	chr1	8131148	8131605	RT4_FOXA1_151		chr1	33533200	33534267	RT4_GATA3_1_151
	chr1	8144027	8144649	RT4_FOXA1_152		chr1	33592928	33593411	RT4_GATA3_1_152
	chr1	8177491	8177931	RT4_FOXA1_153		chr1	33628290	33628836	RT4_GATA3_1_153
	chr1	8181675	8182101	RT4_FOXA1_154		chr1	33648039	33648591	RT4_GATA3_1_154
	chr1	8194079	8194370	RT4_FOXA1_155		chr1	33709735	33710230	RT4_GATA3_1_155
	chr1	8227399	8227765	RT4_FOXA1_156		chr1	33808190	33808802	RT4_GATA3_1_156
	chr1	8242310	8242866	RT4_FOXA1_157		chr1	33842511	33843207	RT4_GATA3_1_157
	chr1	8253121	8253534	RT4_FOXA1_158		chr1	35227382	35227930	RT4_GATA3_1_158
	chr1	8254316	8254999	RT4_FOXA1_159		chr1	35411607	35412245	RT4_GATA3_1_159
	chr1	8257564	8258045	RT4_FOXA1_160		chr1	35520332	35520811	RT4_GATA3_1_160
	chr1	8264051	8264566	RT4_FOXA1_161		chr1	35615483	35616018	RT4_GATA3_1_161
	chr1	8272136	8272417	RT4_FOXA1_162		chr1	35628163	35628727	RT4_GATA3_1_162
	chr1	8318671	8320205	RT4_FOXA1_163		chr1	35660732	35661308	RT4_GATA3_1_163
	chr1	8323288	8323653	RT4_FOXA1_164		chr1	35751816	35752368	RT4_GATA3_1_164
	chr1	8345449	8345810	RT4_FOXA1_165		chr1	35911593	35912109	RT4_GATA3_1_165
	chr1	8349445	8349894	RT4_FOXA1_166		chr1	35971476	35972017	RT4_GATA3_1_166
	chr1	8366531	8367020	RT4_FOXA1_167		chr1	36397134	36397713	RT4_GATA3_1_167
	chr1	8442349	8442628	RT4_FOXA1_168		chr1	36690672	36691320	RT4_GATA3_1_168
	chr1	8450921	8451241	RT4_FOXA1_169		chr1	36845893	36846489	RT4_GATA3_1_169
	chr1	8454928	8455753	RT4_FOXA1_170		chr1	36851474	36852049	RT4_GATA3_1_170
	chr1	8468294	8468501	RT4_FOXA1_171		chr1	36881142	36881741	RT4_GATA3_1_171
	chr1	8471998	8472989	RT4_FOXA1_172		chr1	36936271	36936809	RT4_GATA3_1_172
	chr1	8483829	8484279	RT4_FOXA1_173		chr1	36945186	36945747	RT4_GATA3_1_173
	chr1	8508651	8509425	RT4_FOXA1_174		chr1	38042997	38043599	RT4_GATA3_1_174
	chr1	8550315	8550610	RT4_FOXA1_175		chr1	38320043	38320644	RT4_GATA3_1_175
	chr1	8557793	8557990	RT4_FOXA1_176		chr1	38524373	38524976	RT4_GATA3_1_176
	chr1	8585983	8586458	RT4_FOXA1_177		chr1	38590079	38590637	RT4_GATA3_1_177
	chr1	8600349	8600593	RT4_FOXA1_178		chr1	39251340	39251790	RT4_GATA3_1_178
	chr1	8601095	8601268	RT4_FOXA1_179		chr1	39582694	39583353	RT4_GATA3_1_179
	chr1	8608270	8608641	RT4_FOXA1_180		chr1	39595137	39595763	RT4_GATA3_1_180
	chr1	8619072	8619483	RT4_FOXA1_181		chr1	39681393	39681897	RT4_GATA3_1_181
	chr1	8621223	8621489	RT4_FOXA1_182		chr1	39864258	39864903	RT4_GATA3_1_182
	chr1	8624311	8625030	RT4_FOXA1_183		chr1	40040713	40041669	RT4_GATA3_1_183
	chr1	8627359	8627599	RT4_FOXA1_184		chr1	40057764	40058216	RT4_GATA3_1_184
	chr1	8631610	8631999	RT4_FOXA1_185		chr1	40167401	40167929	RT4_GATA3_1_185
	chr1	8632164	8632447	RT4_FOXA1_186		chr1	40282483	40283049	RT4_GATA3_1_186
	chr1	8635190	8635368	RT4_FOXA1_187		chr1	40295486	40296129	RT4_GATA3_1_187
	chr1	8703885	8704352	RT4_FOXA1_188		chr1	40318069	40318923	RT4_GATA3_1_188
	chr1	8707561	8707851	RT4_FOXA1_189		chr1	40405849	40406352	RT4_GATA3_1_189
	chr1	8730368	8730767	RT4_FOXA1_190		chr1	40415576	40416112	RT4_GATA3_1_190
	chr1	8755676	8755975	RT4_FOXA1_191		chr1	40446013	40446631	RT4_GATA3_1_191
	chr1	8761217	8761608	RT4_FOXA1_192		chr1	40479795	40480721	RT4_GATA3_1_192
	chr1	8762314	8762742	RT4_FOXA1_193		chr1	40495187	40495980	RT4_GATA3_1_193
	chr1	8763232	8763775	RT4_FOXA1_194		chr1	40562835	40563471	RT4_GATA3_1_194
	chr1	8786034	8786353	RT4_FOXA1_195		chr1	40596520	40597110	RT4_GATA3_1_195
	chr1	8794001	8794233	RT4_FOXA1_196		chr1	40604543	40604984	RT4_GATA3_1_196
	chr1	8802083	8802524	RT4_FOXA1_197		chr1	40605771	40606407	RT4_GATA3_1_197
	chr1	8819757	8820032	RT4_FOXA1_198		chr1	40672134	40672684	RT4_GATA3_1_198
	chr1	8847344	8847875	RT4_FOXA1_199		chr1	40771947	40772557	RT4_GATA3_1_199
	chr1	8849799	8850004	RT4_FOXA1_200		chr1	41177205	41177714	RT4_GATA3_1_200
	chr1	8854629	8854873	RT4_FOXA1_201		chr1	41333846	41334410	RT4_GATA3_1_201
	chr1	8857366	8857687	RT4_FOXA1_202		chr1	41351195	41352086	RT4_GATA3_1_202
	chr1	8873592	8873926	RT4_FOXA1_203		chr1	41447671	41448236	RT4_GATA3_1_203
	chr1	8875757	8875999	RT4_FOXA1_204		chr1	41705714	41706256	RT4_GATA3_1_204
	chr1	8882113	8882389	RT4_FOXA1_205		chr1	41782948	41783426	RT4_GATA3_1_205
	chr1	8939893	8940409	RT4_FOXA1_206		chr1	41798827	41799473	RT4_GATA3_1_206
	chr1	8960196	8960886	RT4_FOXA1_207		chr1	41812837	41813451	RT4_GATA3_1_207
	chr1	8978180	8978454	RT4_FOXA1_208		chr1	41819161	41819790	RT4_GATA3_1_208
	chr1	9061908	9062347	RT4_FOXA1_209		chr1	41825783	41826487	RT4_GATA3_1_209
	chr1	9102583	9102891	RT4_FOXA1_210		chr1	41885348	41886074	RT4_GATA3_1_210
	chr1	9135130	9135375	RT4_FOXA1_211		chr1	41908416	41909276	RT4_GATA3_1_211
	chr1	9140842	9141516	RT4_FOXA1_212		chr1	41915057	41915613	RT4_GATA3_1_212
	chr1	9173015	9173429	RT4_FOXA1_213		chr1	41951270	41951856	RT4_GATA3_1_213
	chr1	9174802	9175091	RT4_FOXA1_214		chr1	42130948	42131557	RT4_GATA3_1_214
	chr1	9189012	9189358	RT4_FOXA1_215		chr1	42327283	42327858	RT4_GATA3_1_215
	chr1	9254031	9254469	RT4_FOXA1_216		chr1	42501852	42502404	RT4_GATA3_1_216
	chr1	9258771	9259211	RT4_FOXA1_217		chr1	42671775	42672315	RT4_GATA3_1_217
	chr1	9318904	9319121	RT4_FOXA1_218		chr1	42676076	42676660	RT4_GATA3_1_218
	chr1	9352991	9353476	RT4_FOXA1_219		chr1	42687843	42688449	RT4_GATA3_1_219
	chr1	9353816	9354463	RT4_FOXA1_220		chr1	42905715	42906197	RT4_GATA3_1_220
	chr1	9355032	9355450	RT4_FOXA1_221		chr1	42944876	42945686	RT4_GATA3_1_221
	chr1	9410617	9410794	RT4_FOXA1_222		chr1	43388632	43389181	RT4_GATA3_1_222
	chr1	9466234	9466607	RT4_FOXA1_223		chr1	43420027	43420577	RT4_GATA3_1_223
	chr1	9471068	9471338	RT4_FOXA1_224		chr1	43457804	43458433	RT4_GATA3_1_224
	chr1	9499941	9500239	RT4_FOXA1_225		chr1	43585909	43586452	RT4_GATA3_1_225
	chr1	9508272	9508490	RT4_FOXA1_226		chr1	43586846	43587413	RT4_GATA3_1_226
	chr1	9513592	9513816	RT4_FOXA1_227		chr1	43666012	43666533	RT4_GATA3_1_227
	chr1	9537988	9538186	RT4_FOXA1_228		chr1	43671196	43671762	RT4_GATA3_1_228
	chr1	9596450	9596826	RT4_FOXA1_229		chr1	43672418	43673004	RT4_GATA3_1_229
	chr1	9633921	9634212	RT4_FOXA1_230		chr1	43753582	43754122	RT4_GATA3_1_230
	chr1	9648563	9649079	RT4_FOXA1_231		chr1	43959595	43960151	RT4_GATA3_1_231
	chr1	9731576	9731775	RT4_FOXA1_232		chr1	43988395	43989122	RT4_GATA3_1_232
	chr1	9788512	9788881	RT4_FOXA1_233		chr1	44100383	44101067	RT4_GATA3_1_233
	chr1	9864920	9865309	RT4_FOXA1_234		chr1	44323853	44324423	RT4_GATA3_1_234
	chr1	9883944	9884523	RT4_FOXA1_235		chr1	44338014	44338452	RT4_GATA3_1_235
	chr1	9936771	9937083	RT4_FOXA1_236		chr1	44403206	44403807	RT4_GATA3_1_236
	chr1	9952493	9952963	RT4_FOXA1_237		chr1	44452557	44453102	RT4_GATA3_1_237
	chr1	9970308	9970601	RT4_FOXA1_238		chr1	44600110	44600586	RT4_GATA3_1_238
	chr1	10016725	10016902	RT4_FOXA1_239		chr1	44867610	44868260	RT4_GATA3_1_239
	chr1	10094633	10095163	RT4_FOXA1_240		chr1	44980274	44980839	RT4_GATA3_1_240
	chr1	10142947	10143399	RT4_FOXA1_241		chr1	45498549	45498967	RT4_GATA3_1_241
	chr1	10153696	10153900	RT4_FOXA1_242		chr1	45503094	45503577	RT4_GATA3_1_242
	chr1	10197952	10198207	RT4_FOXA1_243		chr1	45672515	45673073	RT4_GATA3_1_243
	chr1	10214803	10215281	RT4_FOXA1_244		chr1	45870707	45871222	RT4_GATA3_1_244
	chr1	10228838	10229045	RT4_FOXA1_245		chr1	45871607	45872113	RT4_GATA3_1_245
	chr1	10229193	10230896	RT4_FOXA1_246		chr1	45876613	45877660	RT4_GATA3_1_246
	chr1	10245260	10245452	RT4_FOXA1_247		chr1	46061781	46062340	RT4_GATA3_1_247
	chr1	10245945	10246291	RT4_FOXA1_248		chr1	46420112	46420635	RT4_GATA3_1_248
	chr1	10255731	10256067	RT4_FOXA1_249		chr1	46620894	46621429	RT4_GATA3_1_249
	chr1	10270552	10271124	RT4_FOXA1_250		chr1	46647146	46647946	RT4_GATA3_1_250
	chr1	10318267	10318735	RT4_FOXA1_251		chr1	46861444	46862077	RT4_GATA3_1_251
	chr1	10323834	10324301	RT4_FOXA1_252		chr1	46900803	46901289	RT4_GATA3_1_252
	chr1	10519167	10519355	RT4_FOXA1_253		chr1	46933963	46934452	RT4_GATA3_1_253
	chr1	10536958	10537273	RT4_FOXA1_254		chr1	47077527	47078031	RT4_GATA3_1_254
	chr1	10595707	10595992	RT4_FOXA1_255		chr1	47087451	47087919	RT4_GATA3_1_255
	chr1	10615558	10615862	RT4_FOXA1_256		chr1	47180654	47181151	RT4_GATA3_1_256
	chr1	10645807	10646075	RT4_FOXA1_257		chr1	47185165	47185776	RT4_GATA3_1_257
	chr1	10646351	10646961	RT4_FOXA1_258		chr1	47187432	47187932	RT4_GATA3_1_258
	chr1	10651422	10652032	RT4_FOXA1_259		chr1	47214755	47215603	RT4_GATA3_1_259
	chr1	10659440	10659920	RT4_FOXA1_260		chr1	47222379	47222964	RT4_GATA3_1_260
	chr1	10695145	10695737	RT4_FOXA1_261		chr1	47254736	47255318	RT4_GATA3_1_261
	chr1	10699777	10699999	RT4_FOXA1_262		chr1	47256261	47256747	RT4_GATA3_1_262
	chr1	10731215	10731689	RT4_FOXA1_263		chr1	47270129	47270633	RT4_GATA3_1_263
	chr1	10753991	10755254	RT4_FOXA1_264		chr1	47690182	47691047	RT4_GATA3_1_264
	chr1	10759947	10760332	RT4_FOXA1_265		chr1	47889861	47890476	RT4_GATA3_1_265
	chr1	10764507	10765055	RT4_FOXA1_266		chr1	47939959	47940785	RT4_GATA3_1_266
	chr1	10806172	10806465	RT4_FOXA1_267		chr1	47993588	47994218	RT4_GATA3_1_267
	chr1	10821469	10821711	RT4_FOXA1_268		chr1	48182402	48182906	RT4_GATA3_1_268
	chr1	10826156	10826569	RT4_FOXA1_269		chr1	48194069	48194561	RT4_GATA3_1_269
	chr1	10839079	10839715	RT4_FOXA1_270		chr1	48354986	48355405	RT4_GATA3_1_270
	chr1	10843281	10843484	RT4_FOXA1_271		chr1	48425452	48425989	RT4_GATA3_1_271
	chr1	10847618	10847910	RT4_FOXA1_272		chr1	48483164	48483771	RT4_GATA3_1_272
	chr1	10851775	10852069	RT4_FOXA1_273		chr1	48586712	48587220	RT4_GATA3_1_273
	chr1	10853463	10853786	RT4_FOXA1_274		chr1	49163997	49164537	RT4_GATA3_1_274
	chr1	10854039	10854537	RT4_FOXA1_275		chr1	49260542	49261106	RT4_GATA3_1_275
	chr1	10854809	10855139	RT4_FOXA1_276		chr1	49344017	49344667	RT4_GATA3_1_276
	chr1	10856327	10856919	RT4_FOXA1_277		chr1	49612894	49613386	RT4_GATA3_1_277
	chr1	10908734	10908944	RT4_FOXA1_278		chr1	49630151	49630745	RT4_GATA3_1_278
	chr1	10927041	10927617	RT4_FOXA1_279		chr1	49812553	49813127	RT4_GATA3_1_279
	chr1	10953050	10953673	RT4_FOXA1_280		chr1	49920501	49921573	RT4_GATA3_1_280
	chr1	10955963	10956288	RT4_FOXA1_281		chr1	49981588	49982256	RT4_GATA3_1_281
	chr1	11042873	11043706	RT4_FOXA1_282		chr1	49993490	49994050	RT4_GATA3_1_282
	chr1	11094656	11094852	RT4_FOXA1_283		chr1	50168445	50168920	RT4_GATA3_1_283
	chr1	11323199	11323952	RT4_FOXA1_284		chr1	50565944	50566471	RT4_GATA3_1_284
	chr1	11327859	11328324	RT4_FOXA1_285		chr1	50592556	50593430	RT4_GATA3_1_285
	chr1	11376994	11377320	RT4_FOXA1_286		chr1	50866915	50867563	RT4_GATA3_1_286
	chr1	11501012	11501233	RT4_FOXA1_287		chr1	51096645	51097353	RT4_GATA3_1_287
	chr1	11539834	11540092	RT4_FOXA1_288		chr1	51186763	51187237	RT4_GATA3_1_288
	chr1	11540627	11540909	RT4_FOXA1_289		chr1	51509803	51510356	RT4_GATA3_1_289
	chr1	11619797	11620171	RT4_FOXA1_290		chr1	51584519	51585106	RT4_GATA3_1_290
	chr1	11628966	11629167	RT4_FOXA1_291		chr1	51701359	51701867	RT4_GATA3_1_291
	chr1	11718733	11718980	RT4_FOXA1_292		chr1	51811896	51812447	RT4_GATA3_1_292
	chr1	11752032	11752291	RT4_FOXA1_293		chr1	51983382	51983987	RT4_GATA3_1_293
	chr1	11761993	11762359	RT4_FOXA1_294		chr1	52023790	52024394	RT4_GATA3_1_294
	chr1	11864391	11864719	RT4_FOXA1_295		chr1	52035334	52035911	RT4_GATA3_1_295
	chr1	11868270	11868489	RT4_FOXA1_296		chr1	52045662	52046167	RT4_GATA3_1_296
	chr1	12004367	12004579	RT4_FOXA1_297		chr1	52094741	52095346	RT4_GATA3_1_297
	chr1	12027792	12028396	RT4_FOXA1_298		chr1	52100695	52101323	RT4_GATA3_1_298
	chr1	12184766	12185231	RT4_FOXA1_299		chr1	52114058	52114562	RT4_GATA3_1_299
	chr1	12203736	12204065	RT4_FOXA1_300		chr1	52137683	52138238	RT4_GATA3_1_300
	chr1	12252230	12252496	RT4_FOXA1_301		chr1	52232533	52233089	RT4_GATA3_1_301
	chr1	12292542	12292820	RT4_FOXA1_302		chr1	52306649	52307235	RT4_GATA3_1_302
	chr1	12369624	12369978	RT4_FOXA1_303		chr1	52339229	52339740	RT4_GATA3_1_303
	chr1	12436341	12436755	RT4_FOXA1_304		chr1	52528647	52529173	RT4_GATA3_1_304
	chr1	12441219	12441594	RT4_FOXA1_305		chr1	52645656	52646290	RT4_GATA3_1_305
	chr1	12441669	12441999	RT4_FOXA1_306		chr1	52657162	52658050	RT4_GATA3_1_306
	chr1	12442200	12442533	RT4_FOXA1_307		chr1	52704577	52705349	RT4_GATA3_1_307
	chr1	12446224	12446485	RT4_FOXA1_308		chr1	52761799	52762376	RT4_GATA3_1_308
	chr1	12467342	12467688	RT4_FOXA1_309		chr1	53213104	53213598	RT4_GATA3_1_309
	chr1	12493839	12494190	RT4_FOXA1_310		chr1	53333084	53333614	RT4_GATA3_1_310
	chr1	12496818	12497320	RT4_FOXA1_311		chr1	53385860	53386432	RT4_GATA3_1_311
	chr1	12535661	12536431	RT4_FOXA1_312		chr1	53513633	53514282	RT4_GATA3_1_312
	chr1	12540867	12541131	RT4_FOXA1_313		chr1	53573080	53573781	RT4_GATA3_1_313
	chr1	12570386	12570790	RT4_FOXA1_314		chr1	53613726	53614273	RT4_GATA3_1_314
	chr1	12588328	12588728	RT4_FOXA1_315		chr1	53679440	53679941	RT4_GATA3_1_315
	chr1	12589455	12589929	RT4_FOXA1_316		chr1	53792669	53793235	RT4_GATA3_1_316
	chr1	12609913	12610571	RT4_FOXA1_317		chr1	53977347	53977897	RT4_GATA3_1_317
	chr1	12664374	12664677	RT4_FOXA1_318		chr1	54183223	54183906	RT4_GATA3_1_318
	chr1	12677513	12678108	RT4_FOXA1_319		chr1	54407727	54408487	RT4_GATA3_1_319
	chr1	12862897	12863106	RT4_FOXA1_320		chr1	54408687	54409267	RT4_GATA3_1_320
	chr1	13977241	13978034	RT4_FOXA1_321		chr1	54422075	54422514	RT4_GATA3_1_321
	chr1	14010563	14011002	RT4_FOXA1_322		chr1	54422808	54423357	RT4_GATA3_1_322
	chr1	14027165	14027529	RT4_FOXA1_323		chr1	54513483	54514039	RT4_GATA3_1_323
	chr1	14075569	14076495	RT4_FOXA1_324		chr1	54683889	54684435	RT4_GATA3_1_324
	chr1	14076845	14077057	RT4_FOXA1_325		chr1	54788658	54789208	RT4_GATA3_1_325
	chr1	14084049	14084388	RT4_FOXA1_326		chr1	55106686	55107238	RT4_GATA3_1_326
	chr1	14085586	14086000	RT4_FOXA1_327		chr1	55183385	55183941	RT4_GATA3_1_327
	chr1	14093566	14094076	RT4_FOXA1_328		chr1	55350738	55351178	RT4_GATA3_1_328
	chr1	14094491	14094697	RT4_FOXA1_329		chr1	55352327	55352928	RT4_GATA3_1_329
	chr1	14125380	14125821	RT4_FOXA1_330		chr1	55644458	55645086	RT4_GATA3_1_330
	chr1	14126166	14126400	RT4_FOXA1_331		chr1	55676510	55677016	RT4_GATA3_1_331
	chr1	14133774	14134098	RT4_FOXA1_332		chr1	55711364	55711973	RT4_GATA3_1_332
	chr1	14186393	14186758	RT4_FOXA1_333		chr1	55894717	55895676	RT4_GATA3_1_333
	chr1	14198219	14198417	RT4_FOXA1_334		chr1	56104393	56105269	RT4_GATA3_1_334
	chr1	14366439	14366964	RT4_FOXA1_335		chr1	56219390	56219848	RT4_GATA3_1_335
	chr1	14464027	14464251	RT4_FOXA1_336		chr1	56413025	56413543	RT4_GATA3_1_336
	chr1	14466330	14466687	RT4_FOXA1_337		chr1	56567603	56568083	RT4_GATA3_1_337
	chr1	14617754	14618119	RT4_FOXA1_338		chr1	56624423	56624875	RT4_GATA3_1_338
	chr1	14813328	14813600	RT4_FOXA1_339		chr1	56863558	56864085	RT4_GATA3_1_339
	chr1	14876294	14876870	RT4_FOXA1_340		chr1	56982996	56983898	RT4_GATA3_1_340
	chr1	14891533	14891914	RT4_FOXA1_341		chr1	57153880	57154509	RT4_GATA3_1_341
	chr1	14917847	14918124	RT4_FOXA1_342		chr1	57863389	57863964	RT4_GATA3_1_342
	chr1	14976609	14976983	RT4_FOXA1_343		chr1	57866998	57867508	RT4_GATA3_1_343
	chr1	15023445	15023753	RT4_FOXA1_344		chr1	57983487	57984344	RT4_GATA3_1_344
	chr1	15025941	15026277	RT4_FOXA1_345		chr1	58052418	58052999	RT4_GATA3_1_345
	chr1	15160254	15160656	RT4_FOXA1_346		chr1	58057424	58057939	RT4_GATA3_1_346
	chr1	15207714	15207926	RT4_FOXA1_347		chr1	59083515	59084001	RT4_GATA3_1_347
	chr1	15247599	15247815	RT4_FOXA1_348		chr1	59086610	59087615	RT4_GATA3_1_348
	chr1	15252544	15253136	RT4_FOXA1_349		chr1	59117586	59118197	RT4_GATA3_1_349
	chr1	15256042	15256380	RT4_FOXA1_350		chr1	59280673	59281246	RT4_GATA3_1_350
	chr1	15269434	15269706	RT4_FOXA1_351		chr1	59281779	59282261	RT4_GATA3_1_351
	chr1	15343626	15343858	RT4_FOXA1_352		chr1	59362143	59362713	RT4_GATA3_1_352
	chr1	15479666	15480154	RT4_FOXA1_353		chr1	59480269	59480852	RT4_GATA3_1_353
	chr1	15486825	15486997	RT4_FOXA1_354		chr1	59528362	59528911	RT4_GATA3_1_354
	chr1	15493725	15493979	RT4_FOXA1_355		chr1	59581442	59582042	RT4_GATA3_1_355
	chr1	15499419	15499968	RT4_FOXA1_356		chr1	59764439	59764937	RT4_GATA3_1_356
	chr1	15524338	15524604	RT4_FOXA1_357		chr1	59892479	59893065	RT4_GATA3_1_357
	chr1	15525120	15525900	RT4_FOXA1_358		chr1	60138481	60138897	RT4_GATA3_1_358
	chr1	15526795	15527586	RT4_FOXA1_359		chr1	60296574	60297646	RT4_GATA3_1_359
	chr1	15555682	15556100	RT4_FOXA1_360		chr1	60381150	60381696	RT4_GATA3_1_360
	chr1	15556185	15556740	RT4_FOXA1_361		chr1	60441521	60442223	RT4_GATA3_1_361
	chr1	15561132	15561870	RT4_FOXA1_362		chr1	60491734	60492234	RT4_GATA3_1_362
	chr1	15579468	15579854	RT4_FOXA1_363		chr1	60518192	60518876	RT4_GATA3_1_363
	chr1	15611142	15612112	RT4_FOXA1_364		chr1	60556242	60556838	RT4_GATA3_1_364
	chr1	15667538	15667805	RT4_FOXA1_365		chr1	60660707	60661508	RT4_GATA3_1_365
	chr1	15678594	15679226	RT4_FOXA1_366		chr1	60717198	60717767	RT4_GATA3_1_366
	chr1	15715820	15716026	RT4_FOXA1_367		chr1	61365070	61365571	RT4_GATA3_1_367
	chr1	15719775	15720021	RT4_FOXA1_368		chr1	61597599	61598240	RT4_GATA3_1_368
	chr1	15720720	15721069	RT4_FOXA1_369		chr1	61604936	61605537	RT4_GATA3_1_369
	chr1	15735987	15736471	RT4_FOXA1_370		chr1	61607190	61607697	RT4_GATA3_1_370
	chr1	15743421	15744078	RT4_FOXA1_371		chr1	61785354	61785881	RT4_GATA3_1_371
	chr1	15750483	15751188	RT4_FOXA1_372		chr1	61889896	61890441	RT4_GATA3_1_372
	chr1	15759553	15759773	RT4_FOXA1_373		chr1	61911117	61911706	RT4_GATA3_1_373
	chr1	15761862	15762059	RT4_FOXA1_374		chr1	61952425	61952958	RT4_GATA3_1_374
	chr1	15780671	15780908	RT4_FOXA1_375		chr1	62108332	62108894	RT4_GATA3_1_375
	chr1	15783957	15784652	RT4_FOXA1_376		chr1	62209557	62210387	RT4_GATA3_1_376
	chr1	15851498	15851698	RT4_FOXA1_377		chr1	63089239	63089848	RT4_GATA3_1_377
	chr1	15885796	15886423	RT4_FOXA1_378		chr1	63172925	63173526	RT4_GATA3_1_378
	chr1	15928780	15929390	RT4_FOXA1_379		chr1	63249396	63250038	RT4_GATA3_1_379
	chr1	15934678	15934871	RT4_FOXA1_380		chr1	63290785	63291301	RT4_GATA3_1_380
	chr1	15936616	15937364	RT4_FOXA1_381		chr1	63373737	63374387	RT4_GATA3_1_381
	chr1	15943575	15943778	RT4_FOXA1_382		chr1	63989074	63989729	RT4_GATA3_1_382
	chr1	15945269	15945890	RT4_FOXA1_383		chr1	64385946	64386565	RT4_GATA3_1_383
	chr1	15946673	15947155	RT4_FOXA1_384		chr1	64431118	64432004	RT4_GATA3_1_384
	chr1	15954428	15954783	RT4_FOXA1_385		chr1	64449070	64449729	RT4_GATA3_1_385
	chr1	16001721	16002045	RT4_FOXA1_386		chr1	64484112	64484725	RT4_GATA3_1_386
	chr1	16114675	16114997	RT4_FOXA1_387		chr1	64505147	64505722	RT4_GATA3_1_387
	chr1	16115903	16116291	RT4_FOXA1_388		chr1	64544089	64544707	RT4_GATA3_1_388
	chr1	16121709	16122516	RT4_FOXA1_389		chr1	64728814	64729428	RT4_GATA3_1_389
	chr1	16125151	16125817	RT4_FOXA1_390		chr1	64809102	64809678	RT4_GATA3_1_390
	chr1	16126454	16126895	RT4_FOXA1_391		chr1	64998192	64998720	RT4_GATA3_1_391
	chr1	16134767	16135379	RT4_FOXA1_392		chr1	65061051	65062005	RT4_GATA3_1_392
	chr1	16135749	16135958	RT4_FOXA1_393		chr1	65166670	65167232	RT4_GATA3_1_393
	chr1	16146738	16147008	RT4_FOXA1_394		chr1	65364011	65364558	RT4_GATA3_1_394
	chr1	16157078	16157622	RT4_FOXA1_395		chr1	65386606	65387121	RT4_GATA3_1_395
	chr1	16158430	16158927	RT4_FOXA1_396		chr1	65413797	65414741	RT4_GATA3_1_396
	chr1	16159823	16160116	RT4_FOXA1_397		chr1	65539490	65539953	RT4_GATA3_1_397
	chr1	16162276	16162687	RT4_FOXA1_398		chr1	65636130	65636658	RT4_GATA3_1_398
	chr1	16162787	16163214	RT4_FOXA1_399		chr1	65643015	65643607	RT4_GATA3_1_399
	chr1	16173508	16173709	RT4_FOXA1_400		chr1	66229710	66230299	RT4_GATA3_1_400
	chr1	16173799	16174521	RT4_FOXA1_401		chr1	66425599	66426228	RT4_GATA3_1_401
	chr1	16175775	16176242	RT4_FOXA1_402		chr1	66916214	66916619	RT4_GATA3_1_402
	chr1	16176897	16177108	RT4_FOXA1_403		chr1	67029776	67030443	RT4_GATA3_1_403
	chr1	16186734	16187112	RT4_FOXA1_404		chr1	67241352	67241905	RT4_GATA3_1_404
	chr1	16238203	16238905	RT4_FOXA1_405		chr1	67404494	67405020	RT4_GATA3_1_405
	chr1	16242907	16243148	RT4_FOXA1_406		chr1	67518646	67519293	RT4_GATA3_1_406
	chr1	16305421	16305975	RT4_FOXA1_407		chr1	67603074	67603652	RT4_GATA3_1_407
	chr1	16321133	16321309	RT4_FOXA1_408		chr1	67628573	67629208	RT4_GATA3_1_408
	chr1	16400169	16400411	RT4_FOXA1_409		chr1	67841918	67842507	RT4_GATA3_1_409
	chr1	16447526	16448156	RT4_FOXA1_410		chr1	68038428	68039037	RT4_GATA3_1_410
	chr1	16481006	16481348	RT4_FOXA1_411		chr1	68043982	68044471	RT4_GATA3_1_411
	chr1	16482305	16482552	RT4_FOXA1_412		chr1	68045237	68045627	RT4_GATA3_1_412
	chr1	16492092	16492401	RT4_FOXA1_413		chr1	68068355	68068839	RT4_GATA3_1_413
	chr1	16561771	16561994	RT4_FOXA1_414		chr1	68100601	68101231	RT4_GATA3_1_414
	chr1	16643200	16643459	RT4_FOXA1_415		chr1	68112427	68112961	RT4_GATA3_1_415
	chr1	16660826	16661689	RT4_FOXA1_416		chr1	68204015	68204627	RT4_GATA3_1_416
	chr1	16678816	16679181	RT4_FOXA1_417		chr1	68345638	68346226	RT4_GATA3_1_417
	chr1	16693451	16693815	RT4_FOXA1_418		chr1	68373049	68373661	RT4_GATA3_1_418
	chr1	16696649	16696875	RT4_FOXA1_419		chr1	68762924	68763444	RT4_GATA3_1_419
	chr1	16714673	16714896	RT4_FOXA1_420		chr1	69575515	69576124	RT4_GATA3_1_420
	chr1	16825210	16825865	RT4_FOXA1_421		chr1	69587297	69588165	RT4_GATA3_1_421
	chr1	16886160	16886439	RT4_FOXA1_422		chr1	69862176	69862656	RT4_GATA3_1_422
	chr1	16930777	16931249	RT4_FOXA1_423		chr1	70686493	70687003	RT4_GATA3_1_423
	chr1	16970983	16971487	RT4_FOXA1_424		chr1	70805886	70806626	RT4_GATA3_1_424
	chr1	17029779	17030083	RT4_FOXA1_425		chr1	71217060	71218111	RT4_GATA3_1_425
	chr1	17240470	17240927	RT4_FOXA1_426		chr1	71224007	71224516	RT4_GATA3_1_426
	chr1	17278303	17278850	RT4_FOXA1_427		chr1	72107204	72107803	RT4_GATA3_1_427
	chr1	17452819	17453113	RT4_FOXA1_428		chr1	72396173	72396649	RT4_GATA3_1_428
	chr1	17465976	17466410	RT4_FOXA1_429		chr1	74255893	74257060	RT4_GATA3_1_429
	chr1	17506723	17507320	RT4_FOXA1_430		chr1	75173705	75174384	RT4_GATA3_1_430
	chr1	17531192	17531357	RT4_FOXA1_431		chr1	75196965	75197529	RT4_GATA3_1_431
	chr1	17553064	17553316	RT4_FOXA1_432		chr1	75445067	75445606	RT4_GATA3_1_432
	chr1	17558611	17559010	RT4_FOXA1_433		chr1	76174500	76175070	RT4_GATA3_1_433
	chr1	17616470	17616815	RT4_FOXA1_434		chr1	77297199	77297732	RT4_GATA3_1_434
	chr1	17618798	17619127	RT4_FOXA1_435		chr1	77427157	77427682	RT4_GATA3_1_435
	chr1	17619446	17619681	RT4_FOXA1_436		chr1	77705792	77706302	RT4_GATA3_1_436
	chr1	17631465	17631762	RT4_FOXA1_437		chr1	77885538	77885995	RT4_GATA3_1_437
	chr1	17692146	17692559	RT4_FOXA1_438		chr1	78021411	78021913	RT4_GATA3_1_438
	chr1	17743888	17744145	RT4_FOXA1_439		chr1	78047063	78047614	RT4_GATA3_1_439
	chr1	17746413	17746674	RT4_FOXA1_440		chr1	78216600	78217179	RT4_GATA3_1_440
	chr1	17764219	17764584	RT4_FOXA1_441		chr1	78521373	78521989	RT4_GATA3_1_441
	chr1	17765952	17766579	RT4_FOXA1_442		chr1	78541797	78542354	RT4_GATA3_1_442
	chr1	17776376	17776644	RT4_FOXA1_443		chr1	78713000	78713618	RT4_GATA3_1_443
	chr1	17800802	17801174	RT4_FOXA1_444		chr1	78938813	78939312	RT4_GATA3_1_444
	chr1	17802262	17802556	RT4_FOXA1_445		chr1	79141994	79142515	RT4_GATA3_1_445
	chr1	17825499	17825928	RT4_FOXA1_446		chr1	79299136	79299699	RT4_GATA3_1_446
	chr1	17826029	17826343	RT4_FOXA1_447		chr1	79361497	79362488	RT4_GATA3_1_447
	chr1	17908621	17909056	RT4_FOXA1_448		chr1	79414923	79415355	RT4_GATA3_1_448
	chr1	17911213	17911411	RT4_FOXA1_449		chr1	79476204	79476672	RT4_GATA3_1_449
	chr1	18430319	18430849	RT4_FOXA1_450		chr1	79616569	79617221	RT4_GATA3_1_450
	chr1	18578292	18578673	RT4_FOXA1_451		chr1	79692914	79693499	RT4_GATA3_1_451
	chr1	18666088	18666417	RT4_FOXA1_452		chr1	80051295	80051855	RT4_GATA3_1_452
	chr1	18692621	18692949	RT4_FOXA1_453		chr1	80112473	80113005	RT4_GATA3_1_453
	chr1	18743853	18744114	RT4_FOXA1_454		chr1	80442037	80442549	RT4_GATA3_1_454
	chr1	18766937	18767562	RT4_FOXA1_455		chr1	81644835	81645432	RT4_GATA3_1_455
	chr1	18790797	18791549	RT4_FOXA1_456		chr1	81658513	81659333	RT4_GATA3_1_456
	chr1	18861925	18862449	RT4_FOXA1_457		chr1	82006893	82007439	RT4_GATA3_1_457
	chr1	18962176	18962457	RT4_FOXA1_458		chr1	82082897	82083452	RT4_GATA3_1_458
	chr1	18967237	18967641	RT4_FOXA1_459		chr1	82114326	82115264	RT4_GATA3_1_459
	chr1	18971335	18971795	RT4_FOXA1_460		chr1	82169898	82170363	RT4_GATA3_1_460
	chr1	18972956	18973724	RT4_FOXA1_461		chr1	82415030	82415624	RT4_GATA3_1_461
	chr1	18982147	18982533	RT4_FOXA1_462		chr1	82440090	82441054	RT4_GATA3_1_462
	chr1	18994780	18995022	RT4_FOXA1_463		chr1	82464942	82465708	RT4_GATA3_1_463
	chr1	18995103	18995607	RT4_FOXA1_464		chr1	82921136	82921664	RT4_GATA3_1_464
	chr1	19024424	19024936	RT4_FOXA1_465		chr1	83015400	83015997	RT4_GATA3_1_465
	chr1	19046689	19047077	RT4_FOXA1_466		chr1	83286394	83286907	RT4_GATA3_1_466
	chr1	19064474	19064737	RT4_FOXA1_467		chr1	83521049	83521801	RT4_GATA3_1_467
	chr1	19123134	19123743	RT4_FOXA1_468		chr1	83568341	83568985	RT4_GATA3_1_468
	chr1	19146834	19147104	RT4_FOXA1_469		chr1	83600460	83601005	RT4_GATA3_1_469
	chr1	19280321	19280522	RT4_FOXA1_470		chr1	83966554	83967145	RT4_GATA3_1_470
	chr1	19282796	19283034	RT4_FOXA1_471		chr1	84164206	84164732	RT4_GATA3_1_471
	chr1	19325427	19325896	RT4_FOXA1_472		chr1	84632407	84632926	RT4_GATA3_1_472
	chr1	19336872	19337371	RT4_FOXA1_473		chr1	84713166	84713729	RT4_GATA3_1_473
	chr1	19337651	19338248	RT4_FOXA1_474		chr1	84849816	84850320	RT4_GATA3_1_474
	chr1	19460268	19460470	RT4_FOXA1_475		chr1	84852341	84853104	RT4_GATA3_1_475
	chr1	19529874	19530177	RT4_FOXA1_476		chr1	84986897	84987411	RT4_GATA3_1_476
	chr1	19603448	19603812	RT4_FOXA1_477		chr1	85229728	85230287	RT4_GATA3_1_477
	chr1	19614950	19615182	RT4_FOXA1_478		chr1	85348335	85348992	RT4_GATA3_1_478
	chr1	19622618	19622892	RT4_FOXA1_479		chr1	85516409	85516998	RT4_GATA3_1_479
	chr1	19638218	19638739	RT4_FOXA1_480		chr1	85539860	85540457	RT4_GATA3_1_480
	chr1	19739011	19739270	RT4_FOXA1_481		chr1	85626156	85626686	RT4_GATA3_1_481
	chr1	19756763	19757332	RT4_FOXA1_482		chr1	85668131	85669045	RT4_GATA3_1_482
	chr1	19758383	19758568	RT4_FOXA1_483		chr1	85690693	85691410	RT4_GATA3_1_483
	chr1	19763137	19763420	RT4_FOXA1_484		chr1	85786300	85787104	RT4_GATA3_1_484
	chr1	19796144	19796326	RT4_FOXA1_485		chr1	85794529	85795127	RT4_GATA3_1_485
	chr1	19811553	19812167	RT4_FOXA1_486		chr1	85892933	85893464	RT4_GATA3_1_486
	chr1	19829549	19829817	RT4_FOXA1_487		chr1	85961098	85961695	RT4_GATA3_1_487
	chr1	19831186	19831443	RT4_FOXA1_488		chr1	85990043	85990600	RT4_GATA3_1_488
	chr1	19874322	19874818	RT4_FOXA1_489		chr1	86010315	86011394	RT4_GATA3_1_489
	chr1	19887587	19887924	RT4_FOXA1_490		chr1	86141025	86141928	RT4_GATA3_1_490
	chr1	19922640	19923058	RT4_FOXA1_491		chr1	86208899	86209382	RT4_GATA3_1_491
	chr1	19970531	19971121	RT4_FOXA1_492		chr1	86226613	86227219	RT4_GATA3_1_492
	chr1	19974230	19974539	RT4_FOXA1_493		chr1	86272387	86272916	RT4_GATA3_1_493
	chr1	19996846	19997140	RT4_FOXA1_494		chr1	86288201	86288750	RT4_GATA3_1_494
	chr1	20091227	20091457	RT4_FOXA1_495		chr1	86660093	86660680	RT4_GATA3_1_495
	chr1	20097002	20097282	RT4_FOXA1_496		chr1	86685802	86686283	RT4_GATA3_1_496
	chr1	20126348	20126859	RT4_FOXA1_497		chr1	86728903	86729399	RT4_GATA3_1_497
	chr1	20141636	20142161	RT4_FOXA1_498		chr1	86900875	86901440	RT4_GATA3_1_498
	chr1	20244674	20245236	RT4_FOXA1_499		chr1	87061810	87062575	RT4_GATA3_1_499
	chr1	20251406	20252344	RT4_FOXA1_500		chr1	87105737	87106318	RT4_GATA3_1_500
	chr1	20278400	20278670	RT4_FOXA1_501		chr1	87122960	87123785	RT4_GATA3_1_501
	chr1	20300274	20300655	RT4_FOXA1_502		chr1	87186956	87187373	RT4_GATA3_1_502
	chr1	20301588	20301881	RT4_FOXA1_503		chr1	87246426	87246970	RT4_GATA3_1_503
	chr1	20306828	20307379	RT4_FOXA1_504		chr1	87258769	87259313	RT4_GATA3_1_504
	chr1	20384863	20385240	RT4_FOXA1_505		chr1	87458296	87459335	RT4_GATA3_1_505
	chr1	20385505	20385786	RT4_FOXA1_506		chr1	87489561	87490144	RT4_GATA3_1_506
	chr1	20386434	20387095	RT4_FOXA1_507		chr1	87558879	87559412	RT4_GATA3_1_507
	chr1	20406944	20407207	RT4_FOXA1_508		chr1	87615435	87615961	RT4_GATA3_1_508
	chr1	20427513	20427694	RT4_FOXA1_509		chr1	87800303	87800918	RT4_GATA3_1_509
	chr1	20460059	20460373	RT4_FOXA1_510		chr1	87851556	87852318	RT4_GATA3_1_510
	chr1	20466802	20467240	RT4_FOXA1_511		chr1	87857201	87857769	RT4_GATA3_1_511
	chr1	20471765	20472150	RT4_FOXA1_512		chr1	87869813	87870386	RT4_GATA3_1_512
	chr1	20479611	20480362	RT4_FOXA1_513		chr1	87915233	87916165	RT4_GATA3_1_513
	chr1	20492013	20492414	RT4_FOXA1_514		chr1	87938913	87939537	RT4_GATA3_1_514
	chr1	20498050	20498350	RT4_FOXA1_515		chr1	88353850	88354533	RT4_GATA3_1_515
	chr1	20505648	20505968	RT4_FOXA1_516		chr1	88744251	88745334	RT4_GATA3_1_516
	chr1	20510184	20510770	RT4_FOXA1_517		chr1	89143484	89144785	RT4_GATA3_1_517
	chr1	20513681	20513884	RT4_FOXA1_518		chr1	89344291	89344914	RT4_GATA3_1_518
	chr1	20526048	20526382	RT4_FOXA1_519		chr1	89347894	89348361	RT4_GATA3_1_519
	chr1	20544945	20545133	RT4_FOXA1_520		chr1	89483959	89484588	RT4_GATA3_1_520
	chr1	20561377	20561571	RT4_FOXA1_521		chr1	89510909	89511462	RT4_GATA3_1_521
	chr1	20576725	20577364	RT4_FOXA1_522		chr1	89567275	89567831	RT4_GATA3_1_522
	chr1	20577450	20577729	RT4_FOXA1_523		chr1	89591630	89592159	RT4_GATA3_1_523
	chr1	20591858	20592142	RT4_FOXA1_524		chr1	89666668	89667146	RT4_GATA3_1_524
	chr1	20617582	20617840	RT4_FOXA1_525		chr1	89789898	89790455	RT4_GATA3_1_525
	chr1	20780280	20781545	RT4_FOXA1_526		chr1	89920441	89921017	RT4_GATA3_1_526
	chr1	20809227	20809525	RT4_FOXA1_527		chr1	89926281	89926830	RT4_GATA3_1_527
	chr1	20822860	20823103	RT4_FOXA1_528		chr1	90031914	90032695	RT4_GATA3_1_528
	chr1	20864511	20865819	RT4_FOXA1_529		chr1	90238704	90239399	RT4_GATA3_1_529
	chr1	20928018	20928339	RT4_FOXA1_530		chr1	90246212	90246800	RT4_GATA3_1_530
	chr1	21012731	21013039	RT4_FOXA1_531		chr1	90331658	90332095	RT4_GATA3_1_531
	chr1	21044264	21044807	RT4_FOXA1_532		chr1	90355594	90356379	RT4_GATA3_1_532
	chr1	21109864	21110134	RT4_FOXA1_533		chr1	90598368	90599065	RT4_GATA3_1_533
	chr1	21111153	21111717	RT4_FOXA1_534		chr1	90666735	90667376	RT4_GATA3_1_534
	chr1	21113559	21114099	RT4_FOXA1_535		chr1	90686767	90687299	RT4_GATA3_1_535
	chr1	21280934	21281234	RT4_FOXA1_536		chr1	90747622	90748199	RT4_GATA3_1_536
	chr1	21287837	21288069	RT4_FOXA1_537		chr1	91023262	91024206	RT4_GATA3_1_537
	chr1	21290099	21290372	RT4_FOXA1_538		chr1	91243780	91244573	RT4_GATA3_1_538
	chr1	21319191	21319496	RT4_FOXA1_539		chr1	91824268	91825033	RT4_GATA3_1_539
	chr1	21324417	21325051	RT4_FOXA1_540		chr1	92135863	92136451	RT4_GATA3_1_540
	chr1	21334661	21334951	RT4_FOXA1_541		chr1	92261352	92262164	RT4_GATA3_1_541
	chr1	21344463	21344641	RT4_FOXA1_542		chr1	92310641	92311273	RT4_GATA3_1_542
	chr1	21348712	21349055	RT4_FOXA1_543		chr1	92337426	92337926	RT4_GATA3_1_543
	chr1	21384519	21384894	RT4_FOXA1_544		chr1	92355573	92356143	RT4_GATA3_1_544
	chr1	21409893	21410135	RT4_FOXA1_545		chr1	92424442	92424990	RT4_GATA3_1_545
	chr1	21578445	21578745	RT4_FOXA1_546		chr1	92970803	92971351	RT4_GATA3_1_546
	chr1	21662573	21662897	RT4_FOXA1_547		chr1	93151496	93152048	RT4_GATA3_1_547
	chr1	21665187	21665815	RT4_FOXA1_548		chr1	93218313	93218904	RT4_GATA3_1_548
	chr1	21669063	21669317	RT4_FOXA1_549		chr1	93234374	93235095	RT4_GATA3_1_549
	chr1	21672021	21672807	RT4_FOXA1_550		chr1	93789977	93790540	RT4_GATA3_1_550
	chr1	21794564	21794878	RT4_FOXA1_551		chr1	93801998	93802718	RT4_GATA3_1_551
	chr1	21822586	21822844	RT4_FOXA1_552		chr1	93811972	93812552	RT4_GATA3_1_552
	chr1	21858714	21859133	RT4_FOXA1_553		chr1	94084057	94084728	RT4_GATA3_1_553
	chr1	21861338	21861566	RT4_FOXA1_554		chr1	94094663	94095181	RT4_GATA3_1_554
	chr1	21950078	21950660	RT4_FOXA1_555		chr1	94138832	94139368	RT4_GATA3_1_555
	chr1	21977781	21978435	RT4_FOXA1_556		chr1	94152366	94152890	RT4_GATA3_1_556
	chr1	22002342	22003186	RT4_FOXA1_557		chr1	94178181	94178751	RT4_GATA3_1_557
	chr1	22087394	22087841	RT4_FOXA1_558		chr1	94221077	94221664	RT4_GATA3_1_558
	chr1	22109319	22109918	RT4_FOXA1_559		chr1	94269822	94270430	RT4_GATA3_1_559
	chr1	22114406	22115026	RT4_FOXA1_560		chr1	94426239	94426779	RT4_GATA3_1_560
	chr1	22127246	22128071	RT4_FOXA1_561		chr1	94441777	94442414	RT4_GATA3_1_561
	chr1	22208722	22209165	RT4_FOXA1_562		chr1	94510922	94511518	RT4_GATA3_1_562
	chr1	22231428	22231847	RT4_FOXA1_563		chr1	94552339	94553316	RT4_GATA3_1_563
	chr1	22263963	22264214	RT4_FOXA1_564		chr1	94566190	94567559	RT4_GATA3_1_564
	chr1	22269526	22269753	RT4_FOXA1_565		chr1	94704864	94705402	RT4_GATA3_1_565
	chr1	22283288	22284090	RT4_FOXA1_566		chr1	94807923	94808533	RT4_GATA3_1_566
	chr1	22284221	22284524	RT4_FOXA1_567		chr1	94850397	94850967	RT4_GATA3_1_567
	chr1	22292098	22292603	RT4_FOXA1_568		chr1	94871890	94872475	RT4_GATA3_1_568
	chr1	22298573	22299337	RT4_FOXA1_569		chr1	94914349	94915099	RT4_GATA3_1_569
	chr1	22299540	22299918	RT4_FOXA1_570		chr1	94948264	94948767	RT4_GATA3_1_570
	chr1	22346090	22346453	RT4_FOXA1_571		chr1	95044572	95045145	RT4_GATA3_1_571
	chr1	22358114	22358503	RT4_FOXA1_572		chr1	95244351	95244894	RT4_GATA3_1_572
	chr1	22370847	22371291	RT4_FOXA1_573		chr1	95320246	95320840	RT4_GATA3_1_573
	chr1	22378819	22379760	RT4_FOXA1_574		chr1	95417899	95418459	RT4_GATA3_1_574
	chr1	22380777	22381084	RT4_FOXA1_575		chr1	95459396	95459938	RT4_GATA3_1_575
	chr1	22389557	22389747	RT4_FOXA1_576		chr1	95549992	95550493	RT4_GATA3_1_576
	chr1	22396135	22396398	RT4_FOXA1_577		chr1	96273962	96275463	RT4_GATA3_1_577
	chr1	22396848	22397163	RT4_FOXA1_578		chr1	96360812	96361389	RT4_GATA3_1_578
	chr1	22410758	22410939	RT4_FOXA1_579		chr1	96775238	96775694	RT4_GATA3_1_579
	chr1	22527029	22527463	RT4_FOXA1_580		chr1	96841930	96842902	RT4_GATA3_1_580
	chr1	22580435	22580740	RT4_FOXA1_581		chr1	96854469	96854968	RT4_GATA3_1_581
	chr1	22587412	22587798	RT4_FOXA1_582		chr1	97034115	97034672	RT4_GATA3_1_582
	chr1	22627818	22628219	RT4_FOXA1_583		chr1	97142812	97143369	RT4_GATA3_1_583
	chr1	22672832	22673262	RT4_FOXA1_584		chr1	97355783	97356288	RT4_GATA3_1_584
	chr1	22674965	22675559	RT4_FOXA1_585		chr1	97559736	97560249	RT4_GATA3_1_585
	chr1	22739120	22739694	RT4_FOXA1_586		chr1	97642038	97642577	RT4_GATA3_1_586
	chr1	22740581	22740984	RT4_FOXA1_587		chr1	97658303	97658869	RT4_GATA3_1_587
	chr1	22761367	22761746	RT4_FOXA1_588		chr1	98378971	98379565	RT4_GATA3_1_588
	chr1	22881380	22881733	RT4_FOXA1_589		chr1	98403434	98404046	RT4_GATA3_1_589
	chr1	22889717	22889967	RT4_FOXA1_590		chr1	99024700	99025293	RT4_GATA3_1_590
	chr1	22896551	22896968	RT4_FOXA1_591		chr1	99354856	99355366	RT4_GATA3_1_591
	chr1	23037452	23037971	RT4_FOXA1_592		chr1	99381729	99382206	RT4_GATA3_1_592
	chr1	23076847	23077168	RT4_FOXA1_593		chr1	99821491	99822038	RT4_GATA3_1_593
	chr1	23153294	23153609	RT4_FOXA1_594		chr1	99922979	99923647	RT4_GATA3_1_594
	chr1	23156805	23157351	RT4_FOXA1_595		chr1	100007199	100007723	RT4_GATA3_1_595
	chr1	23160851	23161421	RT4_FOXA1_596		chr1	100025955	100026563	RT4_GATA3_1_596
	chr1	23268759	23268995	RT4_FOXA1_597		chr1	100045584	100046350	RT4_GATA3_1_597
	chr1	23310195	23310664	RT4_FOXA1_598		chr1	100125142	100125817	RT4_GATA3_1_598
	chr1	23323067	23323306	RT4_FOXA1_599		chr1	100431458	100431961	RT4_GATA3_1_599
	chr1	23323807	23324000	RT4_FOXA1_600		chr1	100503332	100503879	RT4_GATA3_1_600
	chr1	23347576	23348026	RT4_FOXA1_601		chr1	100731181	100731774	RT4_GATA3_1_601
	chr1	23436977	23437246	RT4_FOXA1_602		chr1	100905573	100906136	RT4_GATA3_1_602
	chr1	23486054	23486379	RT4_FOXA1_603		chr1	101361005	101361565	RT4_GATA3_1_603
	chr1	23495002	23495317	RT4_FOXA1_604		chr1	101724541	101725071	RT4_GATA3_1_604
	chr1	23505454	23505734	RT4_FOXA1_605		chr1	101759118	101759622	RT4_GATA3_1_605
	chr1	23605192	23605696	RT4_FOXA1_606		chr1	101760750	101761323	RT4_GATA3_1_606
	chr1	23609471	23609720	RT4_FOXA1_607		chr1	101836648	101837270	RT4_GATA3_1_607
	chr1	23671872	23672240	RT4_FOXA1_608		chr1	102263287	102263809	RT4_GATA3_1_608
	chr1	23703723	23704444	RT4_FOXA1_609		chr1	102309926	102310480	RT4_GATA3_1_609
	chr1	23711100	23711467	RT4_FOXA1_610		chr1	102524832	102525443	RT4_GATA3_1_610
	chr1	23718579	23718949	RT4_FOXA1_611		chr1	102563272	102564200	RT4_GATA3_1_611
	chr1	23751020	23751407	RT4_FOXA1_612		chr1	102653350	102653787	RT4_GATA3_1_612
	chr1	23888879	23889173	RT4_FOXA1_613		chr1	103092601	103093256	RT4_GATA3_1_613
	chr1	23945974	23946541	RT4_FOXA1_614		chr1	103300877	103301390	RT4_GATA3_1_614
	chr1	23954033	23954321	RT4_FOXA1_615		chr1	103303033	103303613	RT4_GATA3_1_615
	chr1	24030564	24030935	RT4_FOXA1_616		chr1	103362953	103363450	RT4_GATA3_1_616
	chr1	24054032	24054336	RT4_FOXA1_617		chr1	103406642	103407478	RT4_GATA3_1_617
	chr1	24156841	24157540	RT4_FOXA1_618		chr1	103491115	103491695	RT4_GATA3_1_618
	chr1	24158583	24158777	RT4_FOXA1_619		chr1	103627860	103628460	RT4_GATA3_1_619
	chr1	24160739	24161127	RT4_FOXA1_620		chr1	104063690	104064252	RT4_GATA3_1_620
	chr1	24234255	24234937	RT4_FOXA1_621		chr1	106882262	106882797	RT4_GATA3_1_621
	chr1	24239466	24239870	RT4_FOXA1_622		chr1	107540881	107541598	RT4_GATA3_1_622
	chr1	24240512	24241081	RT4_FOXA1_623		chr1	108017754	108018486	RT4_GATA3_1_623
	chr1	24283524	24283914	RT4_FOXA1_624		chr1	108136467	108136971	RT4_GATA3_1_624
	chr1	24285771	24285950	RT4_FOXA1_625		chr1	108139846	108140353	RT4_GATA3_1_625
	chr1	24286418	24286858	RT4_FOXA1_626		chr1	108168947	108169652	RT4_GATA3_1_626
	chr1	24310811	24311199	RT4_FOXA1_627		chr1	108186246	108186839	RT4_GATA3_1_627
	chr1	24345255	24345975	RT4_FOXA1_628		chr1	108215903	108216421	RT4_GATA3_1_628
	chr1	24363701	24363904	RT4_FOXA1_629		chr1	108309875	108310379	RT4_GATA3_1_629
	chr1	24444864	24445098	RT4_FOXA1_630		chr1	108777963	108778429	RT4_GATA3_1_630
	chr1	24513712	24514195	RT4_FOXA1_631		chr1	109061863	109062976	RT4_GATA3_1_631
	chr1	24514646	24514989	RT4_FOXA1_632		chr1	109096465	109097073	RT4_GATA3_1_632
	chr1	24526269	24526596	RT4_FOXA1_633		chr1	109155982	109156582	RT4_GATA3_1_633
	chr1	24570562	24570744	RT4_FOXA1_634		chr1	109234103	109234789	RT4_GATA3_1_634
	chr1	24589985	24590187	RT4_FOXA1_635		chr1	109241756	109242776	RT4_GATA3_1_635
	chr1	24609634	24610056	RT4_FOXA1_636		chr1	109262765	109263620	RT4_GATA3_1_636
	chr1	24700983	24702315	RT4_FOXA1_637		chr1	109372960	109373569	RT4_GATA3_1_637
	chr1	24706774	24707080	RT4_FOXA1_638		chr1	109388657	109389240	RT4_GATA3_1_638
	chr1	24740199	24740555	RT4_FOXA1_639		chr1	109419960	109420518	RT4_GATA3_1_639
	chr1	24828623	24829498	RT4_FOXA1_640		chr1	109592697	109593273	RT4_GATA3_1_640
	chr1	24867462	24868142	RT4_FOXA1_641		chr1	109608850	109609452	RT4_GATA3_1_641
	chr1	24870807	24871024	RT4_FOXA1_642		chr1	109627625	109628454	RT4_GATA3_1_642
	chr1	24894588	24894807	RT4_FOXA1_643		chr1	109759364	109759887	RT4_GATA3_1_643
	chr1	24966657	24967101	RT4_FOXA1_644		chr1	109769901	109770528	RT4_GATA3_1_644
	chr1	24969482	24969772	RT4_FOXA1_645		chr1	110089990	110090527	RT4_GATA3_1_645
	chr1	24999913	25000401	RT4_FOXA1_646		chr1	110194806	110195536	RT4_GATA3_1_646
	chr1	25032003	25032212	RT4_FOXA1_647		chr1	110221160	110222314	RT4_GATA3_1_647
	chr1	25049149	25049448	RT4_FOXA1_648		chr1	110268049	110268563	RT4_GATA3_1_648
	chr1	25062643	25062884	RT4_FOXA1_649		chr1	110305444	110305971	RT4_GATA3_1_649
	chr1	25072128	25072557	RT4_FOXA1_650		chr1	110329981	110330509	RT4_GATA3_1_650
	chr1	25074864	25075218	RT4_FOXA1_651		chr1	110546628	110547473	RT4_GATA3_1_651
	chr1	25092750	25093214	RT4_FOXA1_652		chr1	110756982	110757543	RT4_GATA3_1_652
	chr1	25157258	25157503	RT4_FOXA1_653		chr1	110881655	110882261	RT4_GATA3_1_653
	chr1	25190482	25190914	RT4_FOXA1_654		chr1	110898958	110899524	RT4_GATA3_1_654
	chr1	25196705	25197204	RT4_FOXA1_655		chr1	110975866	110976493	RT4_GATA3_1_655
	chr1	25220063	25220291	RT4_FOXA1_656		chr1	111019276	111020165	RT4_GATA3_1_656
	chr1	25256476	25256929	RT4_FOXA1_657		chr1	111359528	111360136	RT4_GATA3_1_657
	chr1	25258249	25258485	RT4_FOXA1_658		chr1	111459335	111459894	RT4_GATA3_1_658
	chr1	25483628	25483874	RT4_FOXA1_659		chr1	111741742	111742362	RT4_GATA3_1_659
	chr1	25546307	25546729	RT4_FOXA1_660		chr1	111751343	111751918	RT4_GATA3_1_660
	chr1	25546924	25547162	RT4_FOXA1_661		chr1	111779054	111779865	RT4_GATA3_1_661
	chr1	25732608	25732817	RT4_FOXA1_662		chr1	111896981	111897592	RT4_GATA3_1_662
	chr1	25765830	25766112	RT4_FOXA1_663		chr1	111921369	111921963	RT4_GATA3_1_663
	chr1	25912911	25913206	RT4_FOXA1_664		chr1	112046239	112047080	RT4_GATA3_1_664
	chr1	26123370	26123766	RT4_FOXA1_665		chr1	112143247	112143820	RT4_GATA3_1_665
	chr1	26187194	26187509	RT4_FOXA1_666		chr1	112182458	112182951	RT4_GATA3_1_666
	chr1	26231288	26231463	RT4_FOXA1_667		chr1	112312334	112312877	RT4_GATA3_1_667
	chr1	26237709	26238131	RT4_FOXA1_668		chr1	112518791	112519387	RT4_GATA3_1_668
	chr1	26249266	26249460	RT4_FOXA1_669		chr1	112703490	112704153	RT4_GATA3_1_669
	chr1	26406434	26406728	RT4_FOXA1_670		chr1	112729937	112730720	RT4_GATA3_1_670
	chr1	26410021	26410314	RT4_FOXA1_671		chr1	112947828	112948472	RT4_GATA3_1_671
	chr1	26416608	26417191	RT4_FOXA1_672		chr1	113136980	113137508	RT4_GATA3_1_672
	chr1	26419403	26419621	RT4_FOXA1_673		chr1	113179941	113180575	RT4_GATA3_1_673
	chr1	26433122	26433320	RT4_FOXA1_674		chr1	113229829	113230511	RT4_GATA3_1_674
	chr1	26437739	26438121	RT4_FOXA1_675		chr1	113241474	113242033	RT4_GATA3_1_675
	chr1	26453013	26453535	RT4_FOXA1_676		chr1	113361638	113362113	RT4_GATA3_1_676
	chr1	26455120	26455404	RT4_FOXA1_677		chr1	113411850	113412384	RT4_GATA3_1_677
	chr1	26460955	26461158	RT4_FOXA1_678		chr1	113615014	113615637	RT4_GATA3_1_678
	chr1	26488313	26488631	RT4_FOXA1_679		chr1	113689293	113689882	RT4_GATA3_1_679
	chr1	26500914	26501537	RT4_FOXA1_680		chr1	114058031	114058529	RT4_GATA3_1_680
	chr1	26827229	26827639	RT4_FOXA1_681		chr1	114323678	114324240	RT4_GATA3_1_681
	chr1	26879240	26879774	RT4_FOXA1_682		chr1	114977646	114978192	RT4_GATA3_1_682
	chr1	26997589	26997952	RT4_FOXA1_683		chr1	115000669	115001251	RT4_GATA3_1_683
	chr1	27022136	27023013	RT4_FOXA1_684		chr1	115051426	115052467	RT4_GATA3_1_684
	chr1	27028912	27029131	RT4_FOXA1_685		chr1	115604952	115605549	RT4_GATA3_1_685
	chr1	27032402	27032625	RT4_FOXA1_686		chr1	115605745	115606236	RT4_GATA3_1_686
	chr1	27041592	27041775	RT4_FOXA1_687		chr1	115772778	115773316	RT4_GATA3_1_687
	chr1	27044362	27044892	RT4_FOXA1_688		chr1	116025891	116026432	RT4_GATA3_1_688
	chr1	27114165	27114528	RT4_FOXA1_689		chr1	116039619	116040168	RT4_GATA3_1_689
	chr1	27151168	27151508	RT4_FOXA1_690		chr1	116088231	116088968	RT4_GATA3_1_690
	chr1	27190709	27191029	RT4_FOXA1_691		chr1	116094802	116095315	RT4_GATA3_1_691
	chr1	27203887	27204548	RT4_FOXA1_692		chr1	116207826	116208331	RT4_GATA3_1_692
	chr1	27247968	27248348	RT4_FOXA1_693		chr1	116211466	116212049	RT4_GATA3_1_693
	chr1	27297426	27297916	RT4_FOXA1_694		chr1	116253819	116254378	RT4_GATA3_1_694
	chr1	27316747	27317433	RT4_FOXA1_695		chr1	116255699	116256234	RT4_GATA3_1_695
	chr1	27319356	27319575	RT4_FOXA1_696		chr1	116297139	116297669	RT4_GATA3_1_696
	chr1	27335426	27335729	RT4_FOXA1_697		chr1	116383166	116383991	RT4_GATA3_1_697
	chr1	27423405	27423715	RT4_FOXA1_698		chr1	116558006	116558502	RT4_GATA3_1_698
	chr1	27449195	27449484	RT4_FOXA1_699		chr1	116653853	116654448	RT4_GATA3_1_699
	chr1	27470203	27470413	RT4_FOXA1_700		chr1	116674509	116674995	RT4_GATA3_1_700
	chr1	27471000	27471335	RT4_FOXA1_701		chr1	116717503	116718121	RT4_GATA3_1_701
	chr1	27473332	27473610	RT4_FOXA1_702		chr1	116835406	116836012	RT4_GATA3_1_702
	chr1	27488122	27488494	RT4_FOXA1_703		chr1	117009757	117010282	RT4_GATA3_1_703
	chr1	27489563	27489976	RT4_FOXA1_704		chr1	117031580	117032056	RT4_GATA3_1_704
	chr1	27518457	27519066	RT4_FOXA1_705		chr1	117051016	117052111	RT4_GATA3_1_705
	chr1	27561076	27561617	RT4_FOXA1_706		chr1	117112305	117112815	RT4_GATA3_1_706
	chr1	27561723	27562097	RT4_FOXA1_707		chr1	117148786	117149201	RT4_GATA3_1_707
	chr1	27667079	27667799	RT4_FOXA1_708		chr1	117152099	117152686	RT4_GATA3_1_708
	chr1	27668936	27669252	RT4_FOXA1_709		chr1	117195109	117195800	RT4_GATA3_1_709
	chr1	27669966	27670258	RT4_FOXA1_710		chr1	117208561	117209180	RT4_GATA3_1_710
	chr1	27692641	27692920	RT4_FOXA1_711		chr1	117281647	117282321	RT4_GATA3_1_711
	chr1	27763093	27763287	RT4_FOXA1_712		chr1	117420432	117421021	RT4_GATA3_1_712
	chr1	27799839	27800315	RT4_FOXA1_713		chr1	117421537	117422065	RT4_GATA3_1_713
	chr1	27805345	27805630	RT4_FOXA1_714		chr1	117679662	117680390	RT4_GATA3_1_714
	chr1	27815684	27816167	RT4_FOXA1_715		chr1	117722166	117722751	RT4_GATA3_1_715
	chr1	27816662	27817190	RT4_FOXA1_716		chr1	117753302	117754068	RT4_GATA3_1_716
	chr1	27826370	27827019	RT4_FOXA1_717		chr1	117811391	117812052	RT4_GATA3_1_717
	chr1	27848834	27849149	RT4_FOXA1_718		chr1	117826880	117827498	RT4_GATA3_1_718
	chr1	27850833	27851168	RT4_FOXA1_719		chr1	117844292	117845062	RT4_GATA3_1_719
	chr1	27868957	27869235	RT4_FOXA1_720		chr1	118147490	118148145	RT4_GATA3_1_720
	chr1	27935256	27935601	RT4_FOXA1_721		chr1	118295667	118296402	RT4_GATA3_1_721
	chr1	27951811	27952138	RT4_FOXA1_722		chr1	118356924	118357452	RT4_GATA3_1_722
	chr1	27963083	27963475	RT4_FOXA1_723		chr1	118576574	118577111	RT4_GATA3_1_723
	chr1	27998881	27999222	RT4_FOXA1_724		chr1	118623795	118624427	RT4_GATA3_1_724
	chr1	28052270	28052600	RT4_FOXA1_725		chr1	118663571	118664261	RT4_GATA3_1_725
	chr1	28110834	28111196	RT4_FOXA1_726		chr1	118757409	118757967	RT4_GATA3_1_726
	chr1	28124180	28124583	RT4_FOXA1_727		chr1	119327804	119328390	RT4_GATA3_1_727
	chr1	28126911	28127083	RT4_FOXA1_728		chr1	119436445	119436977	RT4_GATA3_1_728
	chr1	28156988	28157384	RT4_FOXA1_729		chr1	119489881	119490986	RT4_GATA3_1_729
	chr1	28201585	28202054	RT4_FOXA1_730		chr1	119496801	119497336	RT4_GATA3_1_730
	chr1	28268421	28268648	RT4_FOXA1_731		chr1	119914887	119915430	RT4_GATA3_1_731
	chr1	28285722	28286165	RT4_FOXA1_732		chr1	119974333	119974922	RT4_GATA3_1_732
	chr1	28306086	28306446	RT4_FOXA1_733		chr1	119989288	119989747	RT4_GATA3_1_733
	chr1	28327292	28327545	RT4_FOXA1_734		chr1	120049432	120050033	RT4_GATA3_1_734
	chr1	28348764	28349371	RT4_FOXA1_735		chr1	120083969	120084798	RT4_GATA3_1_735
	chr1	28360230	28360412	RT4_FOXA1_736		chr1	120096264	120096793	RT4_GATA3_1_736
	chr1	28364631	28364814	RT4_FOXA1_737		chr1	120203082	120203788	RT4_GATA3_1_737
	chr1	28389097	28389576	RT4_FOXA1_738		chr1	120216500	120217224	RT4_GATA3_1_738
	chr1	28390706	28390957	RT4_FOXA1_739		chr1	120228912	120229455	RT4_GATA3_1_739
	chr1	28392482	28392711	RT4_FOXA1_740		chr1	120229902	120230456	RT4_GATA3_1_740
	chr1	28393099	28393462	RT4_FOXA1_741		chr1	120322378	120323002	RT4_GATA3_1_741
	chr1	28395222	28395459	RT4_FOXA1_742		chr1	120361998	120362567	RT4_GATA3_1_742
	chr1	28396809	28397236	RT4_FOXA1_743		chr1	120390246	120390863	RT4_GATA3_1_743
	chr1	28400029	28400273	RT4_FOXA1_744		chr1	120618493	120619006	RT4_GATA3_1_744
	chr1	28423041	28423478	RT4_FOXA1_745		chr1	120821258	120821900	RT4_GATA3_1_745
	chr1	28456277	28456556	RT4_FOXA1_746		chr1	121137431	121137913	RT4_GATA3_1_746
	chr1	28479665	28480370	RT4_FOXA1_747		chr1	121141183	121141924	RT4_GATA3_1_747
	chr1	28485850	28486256	RT4_FOXA1_748		chr1	121225542	121226187	RT4_GATA3_1_748
	chr1	28496712	28496939	RT4_FOXA1_749		chr1	121280663	121281220	RT4_GATA3_1_749
	chr1	28523637	28523879	RT4_FOXA1_750		chr1	121289091	121289646	RT4_GATA3_1_750
	chr1	28566393	28566627	RT4_FOXA1_751		chr1	121305921	121306454	RT4_GATA3_1_751
	chr1	28568240	28568911	RT4_FOXA1_752		chr1	142545858	142546325	RT4_GATA3_1_752
	chr1	28572843	28573235	RT4_FOXA1_753		chr1	142558138	142558742	RT4_GATA3_1_753
	chr1	28575138	28575337	RT4_FOXA1_754		chr1	142563240	142564254	RT4_GATA3_1_754
	chr1	28576008	28576265	RT4_FOXA1_755		chr1	142808359	142809200	RT4_GATA3_1_755
	chr1	28578161	28578582	RT4_FOXA1_756		chr1	142817445	142818436	RT4_GATA3_1_756
	chr1	28580819	28581056	RT4_FOXA1_757		chr1	142829599	142830358	RT4_GATA3_1_757
	chr1	28582588	28582800	RT4_FOXA1_758		chr1	142854480	142855311	RT4_GATA3_1_758
	chr1	28588860	28589086	RT4_FOXA1_759		chr1	142900879	142901784	RT4_GATA3_1_759
	chr1	28612015	28612407	RT4_FOXA1_760		chr1	142914582	142915118	RT4_GATA3_1_760
	chr1	28626682	28626968	RT4_FOXA1_761		chr1	142949593	142950015	RT4_GATA3_1_761
	chr1	28639549	28639756	RT4_FOXA1_762		chr1	142951791	142952718	RT4_GATA3_1_762
	chr1	28664605	28664910	RT4_FOXA1_763		chr1	142957606	142958807	RT4_GATA3_1_763
	chr1	28672572	28673294	RT4_FOXA1_764		chr1	143250932	143251597	RT4_GATA3_1_764
	chr1	28677858	28678739	RT4_FOXA1_765		chr1	143467833	143468375	RT4_GATA3_1_765
	chr1	28679072	28679519	RT4_FOXA1_766		chr1	143526405	143526898	RT4_GATA3_1_766
	chr1	28679930	28680392	RT4_FOXA1_767		chr1	143534299	143536122	RT4_GATA3_1_767
	chr1	28680986	28681512	RT4_FOXA1_768		chr1	143930348	143931063	RT4_GATA3_1_768
	chr1	28692359	28692604	RT4_FOXA1_769		chr1	143965079	143965670	RT4_GATA3_1_769
	chr1	28693150	28693437	RT4_FOXA1_770		chr1	144071523	144072067	RT4_GATA3_1_770
	chr1	28721367	28721577	RT4_FOXA1_771		chr1	144529527	144530319	RT4_GATA3_1_771
	chr1	28732333	28732532	RT4_FOXA1_772		chr1	144575748	144576409	RT4_GATA3_1_772
	chr1	28736386	28736682	RT4_FOXA1_773		chr1	144706741	144707539	RT4_GATA3_1_773
	chr1	28784262	28784498	RT4_FOXA1_774		chr1	144886496	144887028	RT4_GATA3_1_774
	chr1	28812729	28813017	RT4_FOXA1_775		chr1	144927404	144927861	RT4_GATA3_1_775
	chr1	28831675	28832106	RT4_FOXA1_776		chr1	144931391	144931957	RT4_GATA3_1_776
	chr1	28834661	28834946	RT4_FOXA1_777		chr1	144932517	144933051	RT4_GATA3_1_777
	chr1	28837817	28838142	RT4_FOXA1_778		chr1	144936403	144936865	RT4_GATA3_1_778
	chr1	28839972	28840263	RT4_FOXA1_779		chr1	144992664	144993731	RT4_GATA3_1_779
	chr1	28843570	28843900	RT4_FOXA1_780		chr1	145004163	145004925	RT4_GATA3_1_780
	chr1	28844644	28845565	RT4_FOXA1_781		chr1	145029829	145030540	RT4_GATA3_1_781
	chr1	28853189	28853596	RT4_FOXA1_782		chr1	145077052	145077958	RT4_GATA3_1_782
	chr1	28855469	28855736	RT4_FOXA1_783		chr1	145202310	145202810	RT4_GATA3_1_783
	chr1	28860262	28860628	RT4_FOXA1_784		chr1	145243311	145244110	RT4_GATA3_1_784
	chr1	28867216	28867788	RT4_FOXA1_785		chr1	145289696	145290256	RT4_GATA3_1_785
	chr1	28868154	28868670	RT4_FOXA1_786		chr1	145290447	145291097	RT4_GATA3_1_786
	chr1	28880290	28880469	RT4_FOXA1_787		chr1	145398866	145399446	RT4_GATA3_1_787
	chr1	28906456	28907033	RT4_FOXA1_788		chr1	145421490	145422044	RT4_GATA3_1_788
	chr1	28907989	28908197	RT4_FOXA1_789		chr1	145437398	145437917	RT4_GATA3_1_789
	chr1	28917161	28917388	RT4_FOXA1_790		chr1	145449673	145450173	RT4_GATA3_1_790
	chr1	28941854	28942307	RT4_FOXA1_791		chr1	145556370	145557829	RT4_GATA3_1_791
	chr1	28960835	28961605	RT4_FOXA1_792		chr1	145582429	145583201	RT4_GATA3_1_792
	chr1	28974968	28975824	RT4_FOXA1_793		chr1	145616561	145617049	RT4_GATA3_1_793
	chr1	28995164	28995402	RT4_FOXA1_794		chr1	145694187	145694787	RT4_GATA3_1_794
	chr1	29047488	29047857	RT4_FOXA1_795		chr1	145723315	145723899	RT4_GATA3_1_795
	chr1	29063235	29063466	RT4_FOXA1_796		chr1	145787322	145787846	RT4_GATA3_1_796
	chr1	29064756	29064989	RT4_FOXA1_797		chr1	146642215	146643148	RT4_GATA3_1_797
	chr1	29073746	29073916	RT4_FOXA1_798		chr1	146745257	146745886	RT4_GATA3_1_798
	chr1	29074781	29074997	RT4_FOXA1_799		chr1	146986783	146987290	RT4_GATA3_1_799
	chr1	29122903	29123082	RT4_FOXA1_800		chr1	147142158	147142752	RT4_GATA3_1_800
	chr1	29138503	29138736	RT4_FOXA1_801		chr1	147166563	147167195	RT4_GATA3_1_801
	chr1	29152596	29153270	RT4_FOXA1_802		chr1	147187525	147188445	RT4_GATA3_1_802
	chr1	29155000	29155574	RT4_FOXA1_803		chr1	147234719	147235269	RT4_GATA3_1_803
	chr1	29175920	29176196	RT4_FOXA1_804		chr1	147757825	147758296	RT4_GATA3_1_804
	chr1	29211175	29211792	RT4_FOXA1_805		chr1	147770070	147770603	RT4_GATA3_1_805
	chr1	29240746	29240967	RT4_FOXA1_806		chr1	148009005	148010116	RT4_GATA3_1_806
	chr1	29243627	29244014	RT4_FOXA1_807		chr1	148221993	148222481	RT4_GATA3_1_807
	chr1	29248050	29248345	RT4_FOXA1_808		chr1	148517334	148518075	RT4_GATA3_1_808
	chr1	29248610	29248915	RT4_FOXA1_809		chr1	148532368	148532914	RT4_GATA3_1_809
	chr1	29253442	29253800	RT4_FOXA1_810		chr1	148851069	148852136	RT4_GATA3_1_810
	chr1	29258688	29258969	RT4_FOXA1_811		chr1	148863913	148864831	RT4_GATA3_1_811
	chr1	29261048	29261288	RT4_FOXA1_812		chr1	148877861	148878512	RT4_GATA3_1_812
	chr1	29285290	29285551	RT4_FOXA1_813		chr1	148949017	148949724	RT4_GATA3_1_813
	chr1	29292420	29292723	RT4_FOXA1_814		chr1	149306113	149306777	RT4_GATA3_1_814
	chr1	29292956	29293149	RT4_FOXA1_815		chr1	149360671	149361129	RT4_GATA3_1_815
	chr1	29300331	29300686	RT4_FOXA1_816		chr1	149652003	149652473	RT4_GATA3_1_816
	chr1	29320077	29320356	RT4_FOXA1_817		chr1	149909153	149909651	RT4_GATA3_1_817
	chr1	29321390	29321650	RT4_FOXA1_818		chr1	150207863	150208375	RT4_GATA3_1_818
	chr1	29432166	29433247	RT4_FOXA1_819		chr1	150228215	150228804	RT4_GATA3_1_819
	chr1	29502880	29503140	RT4_FOXA1_820		chr1	150373403	150373926	RT4_GATA3_1_820
	chr1	29504328	29504540	RT4_FOXA1_821		chr1	150503820	150504371	RT4_GATA3_1_821
	chr1	29508286	29508579	RT4_FOXA1_822		chr1	150516851	150517330	RT4_GATA3_1_822
	chr1	29512870	29513078	RT4_FOXA1_823		chr1	150518894	150519452	RT4_GATA3_1_823
	chr1	29529196	29529618	RT4_FOXA1_824		chr1	150783308	150783917	RT4_GATA3_1_824
	chr1	29563370	29563742	RT4_FOXA1_825		chr1	150877656	150878267	RT4_GATA3_1_825
	chr1	29563816	29564332	RT4_FOXA1_826		chr1	150954127	150954688	RT4_GATA3_1_826
	chr1	29564482	29564906	RT4_FOXA1_827		chr1	151218621	151219152	RT4_GATA3_1_827
	chr1	29565696	29566023	RT4_FOXA1_828		chr1	151274751	151275413	RT4_GATA3_1_828
	chr1	29575588	29575790	RT4_FOXA1_829		chr1	151464144	151465155	RT4_GATA3_1_829
	chr1	29598261	29598599	RT4_FOXA1_830		chr1	151474462	151475062	RT4_GATA3_1_830
	chr1	29667456	29667903	RT4_FOXA1_831		chr1	151515028	151515523	RT4_GATA3_1_831
	chr1	29705977	29706224	RT4_FOXA1_832		chr1	151521104	151521753	RT4_GATA3_1_832
	chr1	29736978	29737313	RT4_FOXA1_833		chr1	151532699	151533721	RT4_GATA3_1_833
	chr1	29876361	29876881	RT4_FOXA1_834		chr1	151556349	151557298	RT4_GATA3_1_834
	chr1	30042918	30043242	RT4_FOXA1_835		chr1	151712313	151712911	RT4_GATA3_1_835
	chr1	30047687	30047980	RT4_FOXA1_836		chr1	151755815	151756400	RT4_GATA3_1_836
	chr1	30054457	30054727	RT4_FOXA1_837		chr1	151805267	151805701	RT4_GATA3_1_837
	chr1	30056652	30056937	RT4_FOXA1_838		chr1	151870958	151871560	RT4_GATA3_1_838
	chr1	30081131	30081402	RT4_FOXA1_839		chr1	151878138	151878741	RT4_GATA3_1_839
	chr1	30154807	30155001	RT4_FOXA1_840		chr1	151897182	151897717	RT4_GATA3_1_840
	chr1	30182310	30183116	RT4_FOXA1_841		chr1	151952224	151952719	RT4_GATA3_1_841
	chr1	30184914	30185210	RT4_FOXA1_842		chr1	151996524	151997151	RT4_GATA3_1_842
	chr1	30350457	30350770	RT4_FOXA1_843		chr1	152007428	152008041	RT4_GATA3_1_843
	chr1	30353147	30353614	RT4_FOXA1_844		chr1	152020632	152021272	RT4_GATA3_1_844
	chr1	30406042	30406260	RT4_FOXA1_845		chr1	152140278	152140858	RT4_GATA3_1_845
	chr1	30421313	30421708	RT4_FOXA1_846		chr1	152365191	152365840	RT4_GATA3_1_846
	chr1	30457083	30457309	RT4_FOXA1_847		chr1	152433720	152434374	RT4_GATA3_1_847
	chr1	30457779	30458457	RT4_FOXA1_848		chr1	152486188	152486770	RT4_GATA3_1_848
	chr1	30463907	30464160	RT4_FOXA1_849		chr1	152701376	152701873	RT4_GATA3_1_849
	chr1	30498577	30498784	RT4_FOXA1_850		chr1	152739241	152739851	RT4_GATA3_1_850
	chr1	30512211	30512513	RT4_FOXA1_851		chr1	152823347	152823960	RT4_GATA3_1_851
	chr1	30556741	30557074	RT4_FOXA1_852		chr1	152878611	152879235	RT4_GATA3_1_852
	chr1	30649244	30649682	RT4_FOXA1_853		chr1	152926775	152927391	RT4_GATA3_1_853
	chr1	30679190	30679484	RT4_FOXA1_854		chr1	152935348	152936289	RT4_GATA3_1_854
	chr1	30723650	30723836	RT4_FOXA1_855		chr1	152970177	152971311	RT4_GATA3_1_855
	chr1	30891254	30891637	RT4_FOXA1_856		chr1	152973848	152974364	RT4_GATA3_1_856
	chr1	30896982	30897605	RT4_FOXA1_857		chr1	152993716	152994271	RT4_GATA3_1_857
	chr1	30898031	30898373	RT4_FOXA1_858		chr1	153017899	153018400	RT4_GATA3_1_858
	chr1	30908574	30908856	RT4_FOXA1_859		chr1	153031222	153032241	RT4_GATA3_1_859
	chr1	30934584	30934957	RT4_FOXA1_860		chr1	153060303	153060767	RT4_GATA3_1_860
	chr1	30959765	30959965	RT4_FOXA1_861		chr1	153096973	153097608	RT4_GATA3_1_861
	chr1	30962659	30962916	RT4_FOXA1_862		chr1	153114728	153115529	RT4_GATA3_1_862
	chr1	31090695	31090894	RT4_FOXA1_863		chr1	153199644	153200148	RT4_GATA3_1_863
	chr1	31094483	31094692	RT4_FOXA1_864		chr1	153568255	153569279	RT4_GATA3_1_864
	chr1	31107657	31108194	RT4_FOXA1_865		chr1	153680370	153680907	RT4_GATA3_1_865
	chr1	31140195	31140502	RT4_FOXA1_866		chr1	153973988	153974571	RT4_GATA3_1_866
	chr1	31148481	31148765	RT4_FOXA1_867		chr1	154103664	154104414	RT4_GATA3_1_867
	chr1	31273608	31273934	RT4_FOXA1_868		chr1	154158578	154159120	RT4_GATA3_1_868
	chr1	31274015	31274465	RT4_FOXA1_869		chr1	154325885	154326421	RT4_GATA3_1_869
	chr1	31296726	31297188	RT4_FOXA1_870		chr1	154390480	154391016	RT4_GATA3_1_870
	chr1	31298496	31298869	RT4_FOXA1_871		chr1	154599568	154600121	RT4_GATA3_1_871
	chr1	31352034	31352503	RT4_FOXA1_872		chr1	154724405	154725027	RT4_GATA3_1_872
	chr1	31353713	31354131	RT4_FOXA1_873		chr1	154768692	154769255	RT4_GATA3_1_873
	chr1	31374528	31374821	RT4_FOXA1_874		chr1	154780455	154781336	RT4_GATA3_1_874
	chr1	31472353	31472631	RT4_FOXA1_875		chr1	155036581	155037205	RT4_GATA3_1_875
	chr1	31483926	31484093	RT4_FOXA1_876		chr1	155050744	155051357	RT4_GATA3_1_876
	chr1	31498162	31498437	RT4_FOXA1_877		chr1	155090079	155090629	RT4_GATA3_1_877
	chr1	31501659	31501880	RT4_FOXA1_878		chr1	155111668	155112483	RT4_GATA3_1_878
	chr1	31535272	31535684	RT4_FOXA1_879		chr1	155194305	155194921	RT4_GATA3_1_879
	chr1	31538513	31539171	RT4_FOXA1_880		chr1	155507435	155507976	RT4_GATA3_1_880
	chr1	31542002	31542300	RT4_FOXA1_881		chr1	155508576	155509102	RT4_GATA3_1_881
	chr1	31547827	31548136	RT4_FOXA1_882		chr1	155618276	155618784	RT4_GATA3_1_882
	chr1	31584068	31584310	RT4_FOXA1_883		chr1	155660317	155660876	RT4_GATA3_1_883
	chr1	31584573	31584859	RT4_FOXA1_884		chr1	155715000	155715567	RT4_GATA3_1_884
	chr1	31592868	31593059	RT4_FOXA1_885		chr1	155929826	155930342	RT4_GATA3_1_885
	chr1	31621732	31621920	RT4_FOXA1_886		chr1	155973087	155973990	RT4_GATA3_1_886
	chr1	31625400	31625953	RT4_FOXA1_887		chr1	156096001	156096507	RT4_GATA3_1_887
	chr1	31626958	31627171	RT4_FOXA1_888		chr1	156122791	156123371	RT4_GATA3_1_888
	chr1	31627606	31628178	RT4_FOXA1_889		chr1	156205410	156205944	RT4_GATA3_1_889
	chr1	31635448	31636131	RT4_FOXA1_890		chr1	156337657	156338550	RT4_GATA3_1_890
	chr1	31643535	31643943	RT4_FOXA1_891		chr1	156662282	156662859	RT4_GATA3_1_891
	chr1	31644922	31645639	RT4_FOXA1_892		chr1	156663882	156664333	RT4_GATA3_1_892
	chr1	31672817	31673352	RT4_FOXA1_893		chr1	156697527	156698320	RT4_GATA3_1_893
	chr1	31734956	31735371	RT4_FOXA1_894		chr1	156717511	156718214	RT4_GATA3_1_894
	chr1	31736157	31736544	RT4_FOXA1_895		chr1	156736713	156737284	RT4_GATA3_1_895
	chr1	31742519	31742782	RT4_FOXA1_896		chr1	156738224	156738874	RT4_GATA3_1_896
	chr1	31807863	31808250	RT4_FOXA1_897		chr1	156766875	156767499	RT4_GATA3_1_897
	chr1	31853722	31854016	RT4_FOXA1_898		chr1	157014787	157015300	RT4_GATA3_1_898
	chr1	31863674	31863843	RT4_FOXA1_899		chr1	157034607	157035202	RT4_GATA3_1_899
	chr1	31885906	31886352	RT4_FOXA1_900		chr1	157043700	157044648	RT4_GATA3_1_900
	chr1	31887399	31887600	RT4_FOXA1_901		chr1	157073583	157074250	RT4_GATA3_1_901
	chr1	31910827	31911191	RT4_FOXA1_902		chr1	157097367	157097860	RT4_GATA3_1_902
	chr1	31917915	31918277	RT4_FOXA1_903		chr1	157101861	157102241	RT4_GATA3_1_903
	chr1	31918547	31918761	RT4_FOXA1_904		chr1	157102395	157102925	RT4_GATA3_1_904
	chr1	31920073	31920249	RT4_FOXA1_905		chr1	157110999	157111684	RT4_GATA3_1_905
	chr1	31944422	31944763	RT4_FOXA1_906		chr1	157373692	157374224	RT4_GATA3_1_906
	chr1	31944954	31945196	RT4_FOXA1_907		chr1	157557338	157558324	RT4_GATA3_1_907
	chr1	31948073	31948363	RT4_FOXA1_908		chr1	158242259	158242766	RT4_GATA3_1_908
	chr1	31956313	31956553	RT4_FOXA1_909		chr1	158788237	158788860	RT4_GATA3_1_909
	chr1	31960054	31960334	RT4_FOXA1_910		chr1	159046480	159047223	RT4_GATA3_1_910
	chr1	31970378	31970795	RT4_FOXA1_911		chr1	159167552	159168163	RT4_GATA3_1_911
	chr1	31971066	31971424	RT4_FOXA1_912		chr1	159521317	159521835	RT4_GATA3_1_912
	chr1	31976002	31976178	RT4_FOXA1_913		chr1	159870615	159871270	RT4_GATA3_1_913
	chr1	31977445	31977918	RT4_FOXA1_914		chr1	159879954	159880616	RT4_GATA3_1_914
	chr1	31999562	31999799	RT4_FOXA1_915		chr1	159886011	159886467	RT4_GATA3_1_915
	chr1	32019508	32020941	RT4_FOXA1_916		chr1	160039614	160040268	RT4_GATA3_1_916
	chr1	32039452	32040452	RT4_FOXA1_917		chr1	160118953	160119438	RT4_GATA3_1_917
	chr1	32041982	32042267	RT4_FOXA1_918		chr1	160143210	160143736	RT4_GATA3_1_918
	chr1	32043710	32043923	RT4_FOXA1_919		chr1	160146853	160147442	RT4_GATA3_1_919
	chr1	32047545	32047787	RT4_FOXA1_920		chr1	160173281	160173765	RT4_GATA3_1_920
	chr1	32057531	32057903	RT4_FOXA1_921		chr1	160253545	160254288	RT4_GATA3_1_921
	chr1	32059692	32059894	RT4_FOXA1_922		chr1	160263813	160264371	RT4_GATA3_1_922
	chr1	32103080	32103326	RT4_FOXA1_923		chr1	160637363	160637876	RT4_GATA3_1_923
	chr1	32173860	32174045	RT4_FOXA1_924		chr1	160716593	160717418	RT4_GATA3_1_924
	chr1	32206266	32206698	RT4_FOXA1_925		chr1	160881143	160881691	RT4_GATA3_1_925
	chr1	32229950	32230165	RT4_FOXA1_926		chr1	160921019	160921603	RT4_GATA3_1_926
	chr1	32235000	32235250	RT4_FOXA1_927		chr1	160959550	160960028	RT4_GATA3_1_927
	chr1	32259984	32260268	RT4_FOXA1_928		chr1	161014516	161015137	RT4_GATA3_1_928
	chr1	32278863	32279042	RT4_FOXA1_929		chr1	161189804	161190336	RT4_GATA3_1_929
	chr1	32308429	32308701	RT4_FOXA1_930		chr1	161414092	161414989	RT4_GATA3_1_930
	chr1	32321085	32321381	RT4_FOXA1_931		chr1	161423674	161424180	RT4_GATA3_1_931
	chr1	32321885	32322385	RT4_FOXA1_932		chr1	161499491	161500131	RT4_GATA3_1_932
	chr1	32346445	32347020	RT4_FOXA1_933		chr1	161531027	161531594	RT4_GATA3_1_933
	chr1	32347299	32347539	RT4_FOXA1_934		chr1	161581223	161581703	RT4_GATA3_1_934
	chr1	32362462	32362997	RT4_FOXA1_935		chr1	161606053	161606594	RT4_GATA3_1_935
	chr1	32363176	32363937	RT4_FOXA1_936		chr1	161612377	161612965	RT4_GATA3_1_936
	chr1	32372276	32372524	RT4_FOXA1_937		chr1	161735815	161736410	RT4_GATA3_1_937
	chr1	32386190	32386444	RT4_FOXA1_938		chr1	161768194	161768791	RT4_GATA3_1_938
	chr1	32386591	32386857	RT4_FOXA1_939		chr1	162045548	162046158	RT4_GATA3_1_939
	chr1	32392029	32392362	RT4_FOXA1_940		chr1	162061398	162062017	RT4_GATA3_1_940
	chr1	32394062	32394445	RT4_FOXA1_941		chr1	162111244	162112388	RT4_GATA3_1_941
	chr1	32397823	32398308	RT4_FOXA1_942		chr1	162209208	162209644	RT4_GATA3_1_942
	chr1	32405561	32406025	RT4_FOXA1_943		chr1	162338224	162338797	RT4_GATA3_1_943
	chr1	32410190	32410547	RT4_FOXA1_944		chr1	162350248	162350707	RT4_GATA3_1_944
	chr1	32419013	32419458	RT4_FOXA1_945		chr1	162375640	162376137	RT4_GATA3_1_945
	chr1	32421346	32421982	RT4_FOXA1_946		chr1	162490196	162490766	RT4_GATA3_1_946
	chr1	32422101	32422566	RT4_FOXA1_947		chr1	162668644	162669221	RT4_GATA3_1_947
	chr1	32422757	32423011	RT4_FOXA1_948		chr1	162816236	162816849	RT4_GATA3_1_948
	chr1	32423604	32424028	RT4_FOXA1_949		chr1	162818275	162818757	RT4_GATA3_1_949
	chr1	32427960	32428456	RT4_FOXA1_950		chr1	162843630	162844310	RT4_GATA3_1_950
	chr1	32492444	32492750	RT4_FOXA1_951		chr1	164179127	164179691	RT4_GATA3_1_951
	chr1	32527482	32527670	RT4_FOXA1_952		chr1	164527897	164528463	RT4_GATA3_1_952
	chr1	32537248	32537734	RT4_FOXA1_953		chr1	164617766	164618304	RT4_GATA3_1_953
	chr1	32541434	32541619	RT4_FOXA1_954		chr1	164676155	164676942	RT4_GATA3_1_954
	chr1	32560670	32561036	RT4_FOXA1_955		chr1	164741878	164742505	RT4_GATA3_1_955
	chr1	32573067	32573439	RT4_FOXA1_956		chr1	165101692	165102237	RT4_GATA3_1_956
	chr1	32575043	32575520	RT4_FOXA1_957		chr1	165131984	165132617	RT4_GATA3_1_957
	chr1	32583374	32583608	RT4_FOXA1_958		chr1	165425505	165425939	RT4_GATA3_1_958
	chr1	32590660	32590844	RT4_FOXA1_959		chr1	165580083	165580662	RT4_GATA3_1_959
	chr1	32598872	32599427	RT4_FOXA1_960		chr1	165616251	165616891	RT4_GATA3_1_960
	chr1	32604627	32604936	RT4_FOXA1_961		chr1	166343266	166343765	RT4_GATA3_1_961
	chr1	32645202	32645796	RT4_FOXA1_962		chr1	166474279	166474834	RT4_GATA3_1_962
	chr1	32724495	32724829	RT4_FOXA1_963		chr1	166517461	166518002	RT4_GATA3_1_963
	chr1	32736860	32737056	RT4_FOXA1_964		chr1	166582013	166582632	RT4_GATA3_1_964
	chr1	32738474	32739263	RT4_FOXA1_965		chr1	166807423	166807947	RT4_GATA3_1_965
	chr1	32740945	32741582	RT4_FOXA1_966		chr1	166875791	166876333	RT4_GATA3_1_966
	chr1	32743581	32743784	RT4_FOXA1_967		chr1	166925363	166925843	RT4_GATA3_1_967
	chr1	32754806	32755450	RT4_FOXA1_968		chr1	167029103	167029780	RT4_GATA3_1_968
	chr1	32755695	32756384	RT4_FOXA1_969		chr1	167057911	167058463	RT4_GATA3_1_969
	chr1	32756678	32756982	RT4_FOXA1_970		chr1	167180219	167180816	RT4_GATA3_1_970
	chr1	32757388	32757745	RT4_FOXA1_971		chr1	167218145	167218814	RT4_GATA3_1_971
	chr1	32758832	32759011	RT4_FOXA1_972		chr1	167255422	167255980	RT4_GATA3_1_972
	chr1	32767094	32767287	RT4_FOXA1_973		chr1	167266382	167266882	RT4_GATA3_1_973
	chr1	32785499	32785953	RT4_FOXA1_974		chr1	167424600	167425207	RT4_GATA3_1_974
	chr1	32787355	32788090	RT4_FOXA1_975		chr1	167443111	167443869	RT4_GATA3_1_975
	chr1	32808597	32808962	RT4_FOXA1_976		chr1	167513500	167514362	RT4_GATA3_1_976
	chr1	32859913	32860300	RT4_FOXA1_977		chr1	167523033	167523620	RT4_GATA3_1_977
	chr1	32860765	32861029	RT4_FOXA1_978		chr1	167597192	167597679	RT4_GATA3_1_978
	chr1	32861154	32861390	RT4_FOXA1_979		chr1	167658709	167659776	RT4_GATA3_1_979
	chr1	32926511	32926812	RT4_FOXA1_980		chr1	167838393	167839343	RT4_GATA3_1_980
	chr1	32940450	32940668	RT4_FOXA1_981		chr1	168159471	168160047	RT4_GATA3_1_981
	chr1	32952465	32952659	RT4_FOXA1_982		chr1	168205224	168205822	RT4_GATA3_1_982
	chr1	32959676	32959898	RT4_FOXA1_983		chr1	168366092	168366673	RT4_GATA3_1_983
	chr1	32966112	32966559	RT4_FOXA1_984		chr1	168461094	168461645	RT4_GATA3_1_984
	chr1	32986124	32986400	RT4_FOXA1_985		chr1	168468431	168468933	RT4_GATA3_1_985
	chr1	33004910	33005271	RT4_FOXA1_986		chr1	168735795	168736307	RT4_GATA3_1_986
	chr1	33005344	33005668	RT4_FOXA1_987		chr1	168770395	168770990	RT4_GATA3_1_987
	chr1	33013319	33013571	RT4_FOXA1_988		chr1	168793815	168794427	RT4_GATA3_1_988
	chr1	33035028	33035227	RT4_FOXA1_989		chr1	168830878	168831445	RT4_GATA3_1_989
	chr1	33036349	33036556	RT4_FOXA1_990		chr1	168849156	168849671	RT4_GATA3_1_990
	chr1	33055325	33055563	RT4_FOXA1_991		chr1	168908639	168909227	RT4_GATA3_1_991
	chr1	33102772	33103143	RT4_FOXA1_992		chr1	168960612	168961214	RT4_GATA3_1_992
	chr1	33112529	33112753	RT4_FOXA1_993		chr1	169015497	169016102	RT4_GATA3_1_993
	chr1	33120803	33121007	RT4_FOXA1_994		chr1	169076135	169076744	RT4_GATA3_1_994
	chr1	33168224	33168607	RT4_FOXA1_995		chr1	169122758	169123306	RT4_GATA3_1_995
	chr1	33177872	33178274	RT4_FOXA1_996		chr1	169281390	169281974	RT4_GATA3_1_996
	chr1	33179725	33180440	RT4_FOXA1_997		chr1	169448489	169449699	RT4_GATA3_1_997
	chr1	33196840	33197615	RT4_FOXA1_998		chr1	169484508	169485070	RT4_GATA3_1_998
	chr1	33197721	33197897	RT4_FOXA1_999		chr1	169498469	169499078	RT4_GATA3_1_999
	chr1	33207488	33207752	RT4_FOXA1_1000		chr1	169522234	169522739	RT4_GATA3_1_1000
	chr1	33211752	33211918	RT4_FOXA1_1001		chr1	169527796	169528281	RT4_GATA3_1_1001
	chr1	33219579	33219750	RT4_FOXA1_1002		chr1	169668792	169669279	RT4_GATA3_1_1002
	chr1	33222087	33222450	RT4_FOXA1_1003		chr1	169750554	169751005	RT4_GATA3_1_1003
	chr1	33224995	33225450	RT4_FOXA1_1004		chr1	169895237	169895710	RT4_GATA3_1_1004
	chr1	33225938	33226588	RT4_FOXA1_1005		chr1	170159927	170160662	RT4_GATA3_1_1005
	chr1	33228044	33229364	RT4_FOXA1_1006		chr1	170396334	170396877	RT4_GATA3_1_1006
	chr1	33232758	33233288	RT4_FOXA1_1007		chr1	170430610	170431513	RT4_GATA3_1_1007
	chr1	33255003	33255393	RT4_FOXA1_1008		chr1	170560316	170561050	RT4_GATA3_1_1008
	chr1	33281577	33281826	RT4_FOXA1_1009		chr1	171322217	171322777	RT4_GATA3_1_1009
	chr1	33351791	33352231	RT4_FOXA1_1010		chr1	171393559	171394064	RT4_GATA3_1_1010
	chr1	33374417	33374644	RT4_FOXA1_1011		chr1	171457644	171458178	RT4_GATA3_1_1011
	chr1	33415557	33415836	RT4_FOXA1_1012		chr1	171528019	171528494	RT4_GATA3_1_1012
	chr1	33419239	33419822	RT4_FOXA1_1013		chr1	171711422	171712239	RT4_GATA3_1_1013
	chr1	33429029	33429582	RT4_FOXA1_1014		chr1	171750162	171750726	RT4_GATA3_1_1014
	chr1	33444618	33445220	RT4_FOXA1_1015		chr1	172150320	172150796	RT4_GATA3_1_1015
	chr1	33446141	33446313	RT4_FOXA1_1016		chr1	172439075	172439853	RT4_GATA3_1_1016
	chr1	33447292	33447666	RT4_FOXA1_1017		chr1	172482251	172483065	RT4_GATA3_1_1017
	chr1	33456656	33457129	RT4_FOXA1_1018		chr1	172499111	172499636	RT4_GATA3_1_1018
	chr1	33470096	33470555	RT4_FOXA1_1019		chr1	172568965	172569509	RT4_GATA3_1_1019
	chr1	33472927	33473166	RT4_FOXA1_1020		chr1	172643944	172644546	RT4_GATA3_1_1020
	chr1	33474190	33474671	RT4_FOXA1_1021		chr1	172667238	172667932	RT4_GATA3_1_1021
	chr1	33479446	33479687	RT4_FOXA1_1022		chr1	172696362	172697183	RT4_GATA3_1_1022
	chr1	33490138	33490777	RT4_FOXA1_1023		chr1	172747943	172748508	RT4_GATA3_1_1023
	chr1	33513780	33513965	RT4_FOXA1_1024		chr1	172807377	172807937	RT4_GATA3_1_1024
	chr1	33566882	33567059	RT4_FOXA1_1025		chr1	172897277	172897894	RT4_GATA3_1_1025
	chr1	33588848	33589352	RT4_FOXA1_1026		chr1	172902924	172903504	RT4_GATA3_1_1026
	chr1	33615283	33615985	RT4_FOXA1_1027		chr1	172938747	172939188	RT4_GATA3_1_1027
	chr1	33647289	33647938	RT4_FOXA1_1028		chr1	173067722	173068322	RT4_GATA3_1_1028
	chr1	33648056	33648377	RT4_FOXA1_1029		chr1	173228109	173228758	RT4_GATA3_1_1029
	chr1	33684275	33684761	RT4_FOXA1_1030		chr1	173238485	173239018	RT4_GATA3_1_1030
	chr1	33686571	33686775	RT4_FOXA1_1031		chr1	173430298	173431028	RT4_GATA3_1_1031
	chr1	33687736	33687915	RT4_FOXA1_1032		chr1	173496199	173496822	RT4_GATA3_1_1032
	chr1	33722081	33722884	RT4_FOXA1_1033		chr1	173559658	173560355	RT4_GATA3_1_1033
	chr1	33787364	33787595	RT4_FOXA1_1034		chr1	173791981	173792547	RT4_GATA3_1_1034
	chr1	33801801	33801971	RT4_FOXA1_1035		chr1	174125759	174126608	RT4_GATA3_1_1035
	chr1	33807760	33808226	RT4_FOXA1_1036		chr1	174531116	174531652	RT4_GATA3_1_1036
	chr1	33814960	33815713	RT4_FOXA1_1037		chr1	174923947	174924444	RT4_GATA3_1_1037
	chr1	33816236	33816467	RT4_FOXA1_1038		chr1	174940950	174941783	RT4_GATA3_1_1038
	chr1	33829726	33830179	RT4_FOXA1_1039		chr1	174967513	174968042	RT4_GATA3_1_1039
	chr1	33842646	33842981	RT4_FOXA1_1040		chr1	175123996	175124533	RT4_GATA3_1_1040
	chr1	33879585	33879997	RT4_FOXA1_1041		chr1	175308033	175308545	RT4_GATA3_1_1041
	chr1	33896363	33896720	RT4_FOXA1_1042		chr1	175322945	175323537	RT4_GATA3_1_1042
	chr1	33899218	33899728	RT4_FOXA1_1043		chr1	175448586	175449322	RT4_GATA3_1_1043
	chr1	33924229	33924546	RT4_FOXA1_1044		chr1	175809239	175809757	RT4_GATA3_1_1044
	chr1	33978120	33978725	RT4_FOXA1_1045		chr1	176047587	176048388	RT4_GATA3_1_1045
	chr1	34004535	34005242	RT4_FOXA1_1046		chr1	176186616	176187126	RT4_GATA3_1_1046
	chr1	34056117	34056368	RT4_FOXA1_1047		chr1	176191096	176191869	RT4_GATA3_1_1047
	chr1	34125886	34126196	RT4_FOXA1_1048		chr1	176212191	176212647	RT4_GATA3_1_1048
	chr1	34206333	34206565	RT4_FOXA1_1049		chr1	176213915	176214468	RT4_GATA3_1_1049
	chr1	34280699	34280945	RT4_FOXA1_1050		chr1	176403851	176404386	RT4_GATA3_1_1050
	chr1	34418119	34418419	RT4_FOXA1_1051		chr1	176574144	176574692	RT4_GATA3_1_1051
	chr1	34579605	34579822	RT4_FOXA1_1052		chr1	176755283	176755822	RT4_GATA3_1_1052
	chr1	34630608	34630844	RT4_FOXA1_1053		chr1	176792226	176792742	RT4_GATA3_1_1053
	chr1	35105740	35106058	RT4_FOXA1_1054		chr1	176824666	176825231	RT4_GATA3_1_1054
	chr1	35155787	35156228	RT4_FOXA1_1055		chr1	177052630	177053612	RT4_GATA3_1_1055
	chr1	35217690	35217944	RT4_FOXA1_1056		chr1	177225761	177226867	RT4_GATA3_1_1056
	chr1	35218771	35219196	RT4_FOXA1_1057		chr1	177504294	177504872	RT4_GATA3_1_1057
	chr1	35229203	35229456	RT4_FOXA1_1058		chr1	177580132	177581006	RT4_GATA3_1_1058
	chr1	35252048	35252673	RT4_FOXA1_1059		chr1	177820125	177820589	RT4_GATA3_1_1059
	chr1	35264878	35265190	RT4_FOXA1_1060		chr1	177867933	177868449	RT4_GATA3_1_1060
	chr1	35319337	35319602	RT4_FOXA1_1061		chr1	178095058	178095657	RT4_GATA3_1_1061
	chr1	35331474	35331707	RT4_FOXA1_1062		chr1	178292154	178292660	RT4_GATA3_1_1062
	chr1	35394186	35394468	RT4_FOXA1_1063		chr1	178345449	178346064	RT4_GATA3_1_1063
	chr1	35497622	35497985	RT4_FOXA1_1064		chr1	178577145	178577697	RT4_GATA3_1_1064
	chr1	35541928	35542306	RT4_FOXA1_1065		chr1	178624810	178625431	RT4_GATA3_1_1065
	chr1	35574151	35574337	RT4_FOXA1_1066		chr1	178995664	178996284	RT4_GATA3_1_1066
	chr1	35609837	35610032	RT4_FOXA1_1067		chr1	179007733	179008562	RT4_GATA3_1_1067
	chr1	35655506	35655816	RT4_FOXA1_1068		chr1	179261669	179262241	RT4_GATA3_1_1068
	chr1	35657589	35657832	RT4_FOXA1_1069		chr1	179368494	179369021	RT4_GATA3_1_1069
	chr1	35671940	35672156	RT4_FOXA1_1070		chr1	179677865	179678481	RT4_GATA3_1_1070
	chr1	35704233	35704542	RT4_FOXA1_1071		chr1	179700358	179700804	RT4_GATA3_1_1071
	chr1	35730564	35730774	RT4_FOXA1_1072		chr1	179825310	179826298	RT4_GATA3_1_1072
	chr1	35734307	35734964	RT4_FOXA1_1073		chr1	179899979	179900537	RT4_GATA3_1_1073
	chr1	35748536	35748775	RT4_FOXA1_1074		chr1	180067205	180067892	RT4_GATA3_1_1074
	chr1	35755918	35756200	RT4_FOXA1_1075		chr1	180161986	180162505	RT4_GATA3_1_1075
	chr1	35811016	35811590	RT4_FOXA1_1076		chr1	180215797	180216282	RT4_GATA3_1_1076
	chr1	35812583	35812902	RT4_FOXA1_1077		chr1	180476820	180477406	RT4_GATA3_1_1077
	chr1	35817669	35818058	RT4_FOXA1_1078		chr1	180524451	180525027	RT4_GATA3_1_1078
	chr1	35870223	35870446	RT4_FOXA1_1079		chr1	180783869	180784364	RT4_GATA3_1_1079
	chr1	35926651	35926926	RT4_FOXA1_1080		chr1	181058631	181059264	RT4_GATA3_1_1080
	chr1	35933305	35934108	RT4_FOXA1_1081		chr1	181069461	181070145	RT4_GATA3_1_1081
	chr1	35971434	35971769	RT4_FOXA1_1082		chr1	181086891	181087391	RT4_GATA3_1_1082
	chr1	36021654	36022195	RT4_FOXA1_1083		chr1	181283117	181283649	RT4_GATA3_1_1083
	chr1	36042314	36042548	RT4_FOXA1_1084		chr1	181438834	181440048	RT4_GATA3_1_1084
	chr1	36054611	36055179	RT4_FOXA1_1085		chr1	181523746	181524289	RT4_GATA3_1_1085
	chr1	36056438	36056815	RT4_FOXA1_1086		chr1	181667271	181667833	RT4_GATA3_1_1086
	chr1	36107615	36107925	RT4_FOXA1_1087		chr1	182023746	182024264	RT4_GATA3_1_1087
	chr1	36180937	36181181	RT4_FOXA1_1088		chr1	182056217	182056762	RT4_GATA3_1_1088
	chr1	36211315	36211649	RT4_FOXA1_1089		chr1	182150156	182150724	RT4_GATA3_1_1089
	chr1	36236050	36236276	RT4_FOXA1_1090		chr1	182359496	182360145	RT4_GATA3_1_1090
	chr1	36273491	36273990	RT4_FOXA1_1091		chr1	182424623	182425160	RT4_GATA3_1_1091
	chr1	36274953	36275208	RT4_FOXA1_1092		chr1	182572346	182572859	RT4_GATA3_1_1092
	chr1	36330391	36330643	RT4_FOXA1_1093		chr1	182573681	182574224	RT4_GATA3_1_1093
	chr1	36474235	36474500	RT4_FOXA1_1094		chr1	182608899	182609461	RT4_GATA3_1_1094
	chr1	36490563	36490821	RT4_FOXA1_1095		chr1	182704411	182704957	RT4_GATA3_1_1095
	chr1	36592061	36592363	RT4_FOXA1_1096		chr1	182764834	182765354	RT4_GATA3_1_1096
	chr1	36617061	36617239	RT4_FOXA1_1097		chr1	182937974	182938786	RT4_GATA3_1_1097
	chr1	36621396	36621778	RT4_FOXA1_1098		chr1	182944760	182945227	RT4_GATA3_1_1098
	chr1	36627298	36627750	RT4_FOXA1_1099		chr1	182962870	182963439	RT4_GATA3_1_1099
	chr1	36714190	36714653	RT4_FOXA1_1100		chr1	183029497	183030209	RT4_GATA3_1_1100
	chr1	36716265	36716533	RT4_FOXA1_1101		chr1	183056015	183056556	RT4_GATA3_1_1101
	chr1	36724242	36724503	RT4_FOXA1_1102		chr1	183155845	183156398	RT4_GATA3_1_1102
	chr1	36735076	36735328	RT4_FOXA1_1103		chr1	183218682	183219317	RT4_GATA3_1_1103
	chr1	36735873	36736318	RT4_FOXA1_1104		chr1	183236892	183237474	RT4_GATA3_1_1104
	chr1	36758532	36758707	RT4_FOXA1_1105		chr1	183269815	183270421	RT4_GATA3_1_1105
	chr1	36761542	36761708	RT4_FOXA1_1106		chr1	183292923	183293439	RT4_GATA3_1_1106
	chr1	36772330	36772742	RT4_FOXA1_1107		chr1	183380001	183380632	RT4_GATA3_1_1107
	chr1	36788029	36788368	RT4_FOXA1_1108		chr1	183440939	183441470	RT4_GATA3_1_1108
	chr1	36789056	36789284	RT4_FOXA1_1109		chr1	183446969	183447457	RT4_GATA3_1_1109
	chr1	36837090	36837489	RT4_FOXA1_1110		chr1	183507720	183508433	RT4_GATA3_1_1110
	chr1	36853322	36853536	RT4_FOXA1_1111		chr1	183668849	183669426	RT4_GATA3_1_1111
	chr1	36873864	36874165	RT4_FOXA1_1112		chr1	183885108	183885754	RT4_GATA3_1_1112
	chr1	36881139	36881579	RT4_FOXA1_1113		chr1	183926154	183926713	RT4_GATA3_1_1113
	chr1	36902577	36902795	RT4_FOXA1_1114		chr1	183994111	183994722	RT4_GATA3_1_1114
	chr1	36936419	36936784	RT4_FOXA1_1115		chr1	184014071	184014503	RT4_GATA3_1_1115
	chr1	36952119	36953177	RT4_FOXA1_1116		chr1	184096660	184097240	RT4_GATA3_1_1116
	chr1	36984730	36985022	RT4_FOXA1_1117		chr1	184129386	184129925	RT4_GATA3_1_1117
	chr1	37095238	37095556	RT4_FOXA1_1118		chr1	184130358	184130853	RT4_GATA3_1_1118
	chr1	37100903	37101225	RT4_FOXA1_1119		chr1	184374750	184375302	RT4_GATA3_1_1119
	chr1	37500154	37500377	RT4_FOXA1_1120		chr1	184393163	184393767	RT4_GATA3_1_1120
	chr1	37536197	37536583	RT4_FOXA1_1121		chr1	184566798	184567375	RT4_GATA3_1_1121
	chr1	37846168	37846661	RT4_FOXA1_1122		chr1	184604336	184604880	RT4_GATA3_1_1122
	chr1	37930060	37930331	RT4_FOXA1_1123		chr1	184766663	184767632	RT4_GATA3_1_1123
	chr1	37939737	37940273	RT4_FOXA1_1124		chr1	184807509	184808278	RT4_GATA3_1_1124
	chr1	37945277	37945696	RT4_FOXA1_1125		chr1	184923213	184924205	RT4_GATA3_1_1125
	chr1	37961176	37961943	RT4_FOXA1_1126		chr1	185286436	185287091	RT4_GATA3_1_1126
	chr1	37968128	37968488	RT4_FOXA1_1127		chr1	185702630	185703352	RT4_GATA3_1_1127
	chr1	37980157	37980526	RT4_FOXA1_1128		chr1	186317207	186317933	RT4_GATA3_1_1128
	chr1	38000213	38000414	RT4_FOXA1_1129		chr1	186397100	186397790	RT4_GATA3_1_1129
	chr1	38042131	38042500	RT4_FOXA1_1130		chr1	186461584	186462121	RT4_GATA3_1_1130
	chr1	38077908	38078433	RT4_FOXA1_1131		chr1	186467662	186468410	RT4_GATA3_1_1131
	chr1	38086401	38086722	RT4_FOXA1_1132		chr1	186744944	186745562	RT4_GATA3_1_1132
	chr1	38120787	38121162	RT4_FOXA1_1133		chr1	186896146	186896628	RT4_GATA3_1_1133
	chr1	38204710	38205285	RT4_FOXA1_1134		chr1	186919689	186920222	RT4_GATA3_1_1134
	chr1	38259455	38260073	RT4_FOXA1_1135		chr1	186943777	186944288	RT4_GATA3_1_1135
	chr1	38316366	38316649	RT4_FOXA1_1136		chr1	186944971	186945498	RT4_GATA3_1_1136
	chr1	38356168	38356404	RT4_FOXA1_1137		chr1	186951184	186951922	RT4_GATA3_1_1137
	chr1	38365664	38366050	RT4_FOXA1_1138		chr1	186979620	186980156	RT4_GATA3_1_1138
	chr1	38380468	38380816	RT4_FOXA1_1139		chr1	187007904	187008511	RT4_GATA3_1_1139
	chr1	38405690	38405900	RT4_FOXA1_1140		chr1	187377050	187378325	RT4_GATA3_1_1140
	chr1	38454416	38454670	RT4_FOXA1_1141		chr1	188162704	188163240	RT4_GATA3_1_1141
	chr1	38456129	38456444	RT4_FOXA1_1142		chr1	188458305	188458786	RT4_GATA3_1_1142
	chr1	38494443	38494789	RT4_FOXA1_1143		chr1	188675840	188676327	RT4_GATA3_1_1143
	chr1	38496166	38496453	RT4_FOXA1_1144		chr1	188738642	188739254	RT4_GATA3_1_1144
	chr1	38497882	38498409	RT4_FOXA1_1145		chr1	188930630	188931252	RT4_GATA3_1_1145
	chr1	38505185	38505592	RT4_FOXA1_1146		chr1	190093086	190093543	RT4_GATA3_1_1146
	chr1	38510876	38511252	RT4_FOXA1_1147		chr1	190138213	190138843	RT4_GATA3_1_1147
	chr1	38512466	38513023	RT4_FOXA1_1148		chr1	191509542	191510020	RT4_GATA3_1_1148
	chr1	38580754	38581166	RT4_FOXA1_1149		chr1	192677232	192677765	RT4_GATA3_1_1149
	chr1	38605865	38606144	RT4_FOXA1_1150		chr1	192774707	192775353	RT4_GATA3_1_1150
	chr1	38648230	38648408	RT4_FOXA1_1151		chr1	192846325	192846912	RT4_GATA3_1_1151
	chr1	38690755	38691255	RT4_FOXA1_1152		chr1	193073375	193073970	RT4_GATA3_1_1152
	chr1	38705629	38705879	RT4_FOXA1_1153		chr1	193431700	193432313	RT4_GATA3_1_1153
	chr1	38731797	38732257	RT4_FOXA1_1154		chr1	194202858	194203370	RT4_GATA3_1_1154
	chr1	38843333	38843639	RT4_FOXA1_1155		chr1	194504077	194504957	RT4_GATA3_1_1155
	chr1	39072317	39072652	RT4_FOXA1_1156		chr1	194898480	194898884	RT4_GATA3_1_1156
	chr1	39092871	39093061	RT4_FOXA1_1157		chr1	195414252	195414764	RT4_GATA3_1_1157
	chr1	39118193	39118466	RT4_FOXA1_1158		chr1	195839087	195840062	RT4_GATA3_1_1158
	chr1	39179394	39179634	RT4_FOXA1_1159		chr1	195908968	195909600	RT4_GATA3_1_1159
	chr1	39190803	39191356	RT4_FOXA1_1160		chr1	195971201	195971875	RT4_GATA3_1_1160
	chr1	39199386	39199740	RT4_FOXA1_1161		chr1	195987812	195988406	RT4_GATA3_1_1161
	chr1	39211152	39211474	RT4_FOXA1_1162		chr1	196150091	196150589	RT4_GATA3_1_1162
	chr1	39249528	39249788	RT4_FOXA1_1163		chr1	196158763	196159442	RT4_GATA3_1_1163
	chr1	39268950	39269160	RT4_FOXA1_1164		chr1	196247813	196248380	RT4_GATA3_1_1164
	chr1	39278330	39278645	RT4_FOXA1_1165		chr1	196330014	196330658	RT4_GATA3_1_1165
	chr1	39283559	39284061	RT4_FOXA1_1166		chr1	196349009	196349549	RT4_GATA3_1_1166
	chr1	39323982	39324369	RT4_FOXA1_1167		chr1	196496919	196497483	RT4_GATA3_1_1167
	chr1	39354746	39355025	RT4_FOXA1_1168		chr1	196647577	196648133	RT4_GATA3_1_1168
	chr1	39357552	39357733	RT4_FOXA1_1169		chr1	197115942	197116426	RT4_GATA3_1_1169
	chr1	39378561	39378809	RT4_FOXA1_1170		chr1	197143181	197143716	RT4_GATA3_1_1170
	chr1	39405953	39406315	RT4_FOXA1_1171		chr1	197169380	197169984	RT4_GATA3_1_1171
	chr1	39416776	39417222	RT4_FOXA1_1172		chr1	197324059	197324787	RT4_GATA3_1_1172
	chr1	39424363	39424547	RT4_FOXA1_1173		chr1	197437137	197437795	RT4_GATA3_1_1173
	chr1	39427142	39427397	RT4_FOXA1_1174		chr1	197750899	197751498	RT4_GATA3_1_1174
	chr1	39428903	39429090	RT4_FOXA1_1175		chr1	197963811	197965057	RT4_GATA3_1_1175
	chr1	39434817	39435090	RT4_FOXA1_1176		chr1	198276491	198276984	RT4_GATA3_1_1176
	chr1	39452312	39452993	RT4_FOXA1_1177		chr1	198434162	198434852	RT4_GATA3_1_1177
	chr1	39456427	39456800	RT4_FOXA1_1178		chr1	198640310	198641705	RT4_GATA3_1_1178
	chr1	39482227	39482487	RT4_FOXA1_1179		chr1	198650754	198651392	RT4_GATA3_1_1179
	chr1	39518619	39519083	RT4_FOXA1_1180		chr1	198658547	198659062	RT4_GATA3_1_1180
	chr1	39530627	39531161	RT4_FOXA1_1181		chr1	198850221	198850778	RT4_GATA3_1_1181
	chr1	39531313	39531601	RT4_FOXA1_1182		chr1	199241533	199242115	RT4_GATA3_1_1182
	chr1	39547499	39547978	RT4_FOXA1_1183		chr1	199499715	199500488	RT4_GATA3_1_1183
	chr1	39560348	39560718	RT4_FOXA1_1184		chr1	199562582	199563177	RT4_GATA3_1_1184
	chr1	39577594	39578034	RT4_FOXA1_1185		chr1	199582523	199582981	RT4_GATA3_1_1185
	chr1	39578887	39579075	RT4_FOXA1_1186		chr1	199747330	199747828	RT4_GATA3_1_1186
	chr1	39581966	39582289	RT4_FOXA1_1187		chr1	199878072	199878733	RT4_GATA3_1_1187
	chr1	39582553	39583456	RT4_FOXA1_1188		chr1	200069699	200070172	RT4_GATA3_1_1188
	chr1	39596802	39597005	RT4_FOXA1_1189		chr1	200076040	200076577	RT4_GATA3_1_1189
	chr1	39621369	39621590	RT4_FOXA1_1190		chr1	200100629	200101205	RT4_GATA3_1_1190
	chr1	39623922	39624238	RT4_FOXA1_1191		chr1	200379671	200380235	RT4_GATA3_1_1191
	chr1	39624870	39625295	RT4_FOXA1_1192		chr1	200402253	200402758	RT4_GATA3_1_1192
	chr1	39636721	39637054	RT4_FOXA1_1193		chr1	200608948	200609559	RT4_GATA3_1_1193
	chr1	39649345	39649585	RT4_FOXA1_1194		chr1	200612122	200612677	RT4_GATA3_1_1194
	chr1	39651219	39651433	RT4_FOXA1_1195		chr1	200637560	200638216	RT4_GATA3_1_1195
	chr1	39651741	39652101	RT4_FOXA1_1196		chr1	200744188	200744882	RT4_GATA3_1_1196
	chr1	39657460	39658082	RT4_FOXA1_1197		chr1	201014175	201014724	RT4_GATA3_1_1197
	chr1	39672801	39673057	RT4_FOXA1_1198		chr1	201146185	201147220	RT4_GATA3_1_1198
	chr1	39681043	39681276	RT4_FOXA1_1199		chr1	201265176	201265735	RT4_GATA3_1_1199
	chr1	39742108	39742572	RT4_FOXA1_1200		chr1	201278418	201279064	RT4_GATA3_1_1200
	chr1	39745526	39745821	RT4_FOXA1_1201		chr1	201416686	201417275	RT4_GATA3_1_1201
	chr1	39796369	39796692	RT4_FOXA1_1202		chr1	201430417	201430926	RT4_GATA3_1_1202
	chr1	39861148	39861375	RT4_FOXA1_1203		chr1	201481214	201481872	RT4_GATA3_1_1203
	chr1	39874358	39874753	RT4_FOXA1_1204		chr1	201486574	201487211	RT4_GATA3_1_1204
	chr1	39883266	39883654	RT4_FOXA1_1205		chr1	201885664	201886227	RT4_GATA3_1_1205
	chr1	39948241	39948477	RT4_FOXA1_1206		chr1	201976511	201977111	RT4_GATA3_1_1206
	chr1	39957446	39958114	RT4_FOXA1_1207		chr1	201987490	201988294	RT4_GATA3_1_1207
	chr1	39970867	39971371	RT4_FOXA1_1208		chr1	202124390	202124937	RT4_GATA3_1_1208
	chr1	39983512	39983944	RT4_FOXA1_1209		chr1	202166867	202167488	RT4_GATA3_1_1209
	chr1	40039164	40039596	RT4_FOXA1_1210		chr1	202189745	202190321	RT4_GATA3_1_1210
	chr1	40042504	40042698	RT4_FOXA1_1211		chr1	202349154	202349715	RT4_GATA3_1_1211
	chr1	40053419	40054054	RT4_FOXA1_1212		chr1	202376607	202377104	RT4_GATA3_1_1212
	chr1	40055177	40055369	RT4_FOXA1_1213		chr1	202379486	202381075	RT4_GATA3_1_1213
	chr1	40055717	40055909	RT4_FOXA1_1214		chr1	202545344	202545871	RT4_GATA3_1_1214
	chr1	40067643	40067932	RT4_FOXA1_1215		chr1	202555303	202555948	RT4_GATA3_1_1215
	chr1	40071475	40071854	RT4_FOXA1_1216		chr1	202732028	202732559	RT4_GATA3_1_1216
	chr1	40072004	40072228	RT4_FOXA1_1217		chr1	202779487	202780005	RT4_GATA3_1_1217
	chr1	40072971	40073141	RT4_FOXA1_1218		chr1	202790638	202791126	RT4_GATA3_1_1218
	chr1	40142059	40142319	RT4_FOXA1_1219		chr1	203115514	203116089	RT4_GATA3_1_1219
	chr1	40167161	40167376	RT4_FOXA1_1220		chr1	203237977	203238607	RT4_GATA3_1_1220
	chr1	40185725	40185968	RT4_FOXA1_1221		chr1	203272405	203273118	RT4_GATA3_1_1221
	chr1	40253682	40254241	RT4_FOXA1_1222		chr1	203275311	203275798	RT4_GATA3_1_1222
	chr1	40254526	40254952	RT4_FOXA1_1223		chr1	203283089	203283608	RT4_GATA3_1_1223
	chr1	40280411	40280577	RT4_FOXA1_1224		chr1	203285551	203286267	RT4_GATA3_1_1224
	chr1	40283137	40283464	RT4_FOXA1_1225		chr1	203304503	203305127	RT4_GATA3_1_1225
	chr1	40291493	40291666	RT4_FOXA1_1226		chr1	203379279	203380105	RT4_GATA3_1_1226
	chr1	40291753	40292506	RT4_FOXA1_1227		chr1	203400010	203400586	RT4_GATA3_1_1227
	chr1	40293200	40293504	RT4_FOXA1_1228		chr1	203483221	203483804	RT4_GATA3_1_1228
	chr1	40306054	40306310	RT4_FOXA1_1229		chr1	203488438	203488902	RT4_GATA3_1_1229
	chr1	40311799	40312124	RT4_FOXA1_1230		chr1	203490470	203491064	RT4_GATA3_1_1230
	chr1	40316262	40316615	RT4_FOXA1_1231		chr1	203505953	203506502	RT4_GATA3_1_1231
	chr1	40317366	40317628	RT4_FOXA1_1232		chr1	203732603	203733159	RT4_GATA3_1_1232
	chr1	40317927	40318407	RT4_FOXA1_1233		chr1	203839100	203839866	RT4_GATA3_1_1233
	chr1	40318642	40319408	RT4_FOXA1_1234		chr1	203876806	203877361	RT4_GATA3_1_1234
	chr1	40325511	40325859	RT4_FOXA1_1235		chr1	203898715	203899333	RT4_GATA3_1_1235
	chr1	40338067	40338591	RT4_FOXA1_1236		chr1	204049323	204049871	RT4_GATA3_1_1236
	chr1	40345784	40346219	RT4_FOXA1_1237		chr1	204073263	204074218	RT4_GATA3_1_1237
	chr1	40358159	40358561	RT4_FOXA1_1238		chr1	204118113	204118687	RT4_GATA3_1_1238
	chr1	40367124	40368115	RT4_FOXA1_1239		chr1	204131369	204131941	RT4_GATA3_1_1239
	chr1	40417543	40417788	RT4_FOXA1_1240		chr1	204255863	204256703	RT4_GATA3_1_1240
	chr1	40435713	40436282	RT4_FOXA1_1241		chr1	204285862	204286750	RT4_GATA3_1_1241
	chr1	40437546	40437770	RT4_FOXA1_1242		chr1	204386138	204387141	RT4_GATA3_1_1242
	chr1	40442696	40442896	RT4_FOXA1_1243		chr1	204494085	204494600	RT4_GATA3_1_1243
	chr1	40443972	40444220	RT4_FOXA1_1244		chr1	204534736	204535197	RT4_GATA3_1_1244
	chr1	40454083	40455043	RT4_FOXA1_1245		chr1	204893550	204894132	RT4_GATA3_1_1245
	chr1	40455939	40456569	RT4_FOXA1_1246		chr1	205454693	205455177	RT4_GATA3_1_1246
	chr1	40481409	40481709	RT4_FOXA1_1247		chr1	205548396	205549007	RT4_GATA3_1_1247
	chr1	40490457	40490692	RT4_FOXA1_1248		chr1	205559653	205560276	RT4_GATA3_1_1248
	chr1	40495176	40495847	RT4_FOXA1_1249		chr1	205580233	205580792	RT4_GATA3_1_1249
	chr1	40524311	40524513	RT4_FOXA1_1250		chr1	205680135	205680655	RT4_GATA3_1_1250
	chr1	40573328	40573870	RT4_FOXA1_1251		chr1	205703459	205703994	RT4_GATA3_1_1251
	chr1	40621584	40622131	RT4_FOXA1_1252		chr1	205760160	205760709	RT4_GATA3_1_1252
	chr1	40622212	40622492	RT4_FOXA1_1253		chr1	205863184	205863730	RT4_GATA3_1_1253
	chr1	40641697	40641962	RT4_FOXA1_1254		chr1	205912411	205913074	RT4_GATA3_1_1254
	chr1	40708901	40709249	RT4_FOXA1_1255		chr1	205917436	205918485	RT4_GATA3_1_1255
	chr1	40712363	40712582	RT4_FOXA1_1256		chr1	206120376	206121255	RT4_GATA3_1_1256
	chr1	40770717	40771293	RT4_FOXA1_1257		chr1	206218146	206218672	RT4_GATA3_1_1257
	chr1	40771981	40772628	RT4_FOXA1_1258		chr1	206260422	206261061	RT4_GATA3_1_1258
	chr1	40840038	40840556	RT4_FOXA1_1259		chr1	206518946	206519643	RT4_GATA3_1_1259
	chr1	40845148	40845487	RT4_FOXA1_1260		chr1	206841572	206842162	RT4_GATA3_1_1260
	chr1	40849779	40850047	RT4_FOXA1_1261		chr1	206845740	206846270	RT4_GATA3_1_1261
	chr1	40851597	40851772	RT4_FOXA1_1262		chr1	207126651	207127189	RT4_GATA3_1_1262
	chr1	40862563	40862747	RT4_FOXA1_1263		chr1	207128702	207129308	RT4_GATA3_1_1263
	chr1	40870553	40870984	RT4_FOXA1_1264		chr1	207173841	207174428	RT4_GATA3_1_1264
	chr1	40943642	40943846	RT4_FOXA1_1265		chr1	207174612	207175205	RT4_GATA3_1_1265
	chr1	40949817	40950081	RT4_FOXA1_1266		chr1	207202312	207202913	RT4_GATA3_1_1266
	chr1	40964167	40964347	RT4_FOXA1_1267		chr1	207414104	207415026	RT4_GATA3_1_1267
	chr1	41035249	41035501	RT4_FOXA1_1268		chr1	207475928	207476427	RT4_GATA3_1_1268
	chr1	41091622	41092279	RT4_FOXA1_1269		chr1	207489812	207490792	RT4_GATA3_1_1269
	chr1	41153853	41154034	RT4_FOXA1_1270		chr1	207509198	207509788	RT4_GATA3_1_1270
	chr1	41158530	41158763	RT4_FOXA1_1271		chr1	207919675	207920257	RT4_GATA3_1_1271
	chr1	41174767	41175041	RT4_FOXA1_1272		chr1	207963118	207964182	RT4_GATA3_1_1272
	chr1	41177206	41177597	RT4_FOXA1_1273		chr1	208059927	208060497	RT4_GATA3_1_1273
	chr1	41177965	41178520	RT4_FOXA1_1274		chr1	208124089	208124629	RT4_GATA3_1_1274
	chr1	41215570	41215880	RT4_FOXA1_1275		chr1	208126141	208126682	RT4_GATA3_1_1275
	chr1	41249323	41249707	RT4_FOXA1_1276		chr1	208362442	208363019	RT4_GATA3_1_1276
	chr1	41284088	41284257	RT4_FOXA1_1277		chr1	208694952	208695397	RT4_GATA3_1_1277
	chr1	41327011	41327291	RT4_FOXA1_1278		chr1	209275283	209275966	RT4_GATA3_1_1278
	chr1	41327455	41327639	RT4_FOXA1_1279		chr1	209551342	209551893	RT4_GATA3_1_1279
	chr1	41332216	41332509	RT4_FOXA1_1280		chr1	209557130	209557758	RT4_GATA3_1_1280
	chr1	41333588	41333892	RT4_FOXA1_1281		chr1	209558940	209559487	RT4_GATA3_1_1281
	chr1	41333961	41334439	RT4_FOXA1_1282		chr1	209572480	209573072	RT4_GATA3_1_1282
	chr1	41341529	41341940	RT4_FOXA1_1283		chr1	209589487	209590155	RT4_GATA3_1_1283
	chr1	41352120	41352695	RT4_FOXA1_1284		chr1	209600676	209602084	RT4_GATA3_1_1284
	chr1	41355400	41355578	RT4_FOXA1_1285		chr1	209760963	209761516	RT4_GATA3_1_1285
	chr1	41364259	41364518	RT4_FOXA1_1286		chr1	209880543	209881133	RT4_GATA3_1_1286
	chr1	41372445	41373175	RT4_FOXA1_1287		chr1	209960104	209960832	RT4_GATA3_1_1287
	chr1	41397768	41397974	RT4_FOXA1_1288		chr1	209962526	209963137	RT4_GATA3_1_1288
	chr1	41402433	41402926	RT4_FOXA1_1289		chr1	209975503	209976034	RT4_GATA3_1_1289
	chr1	41433550	41433718	RT4_FOXA1_1290		chr1	209976581	209977157	RT4_GATA3_1_1290
	chr1	41447924	41448283	RT4_FOXA1_1291		chr1	210000653	210001169	RT4_GATA3_1_1291
	chr1	41506811	41507065	RT4_FOXA1_1292		chr1	210050473	210050951	RT4_GATA3_1_1292
	chr1	41509797	41510162	RT4_FOXA1_1293		chr1	210068998	210069471	RT4_GATA3_1_1293
	chr1	41551700	41551986	RT4_FOXA1_1294		chr1	210547759	210548385	RT4_GATA3_1_1294
	chr1	41639883	41640123	RT4_FOXA1_1295		chr1	210637918	210638404	RT4_GATA3_1_1295
	chr1	41658085	41658290	RT4_FOXA1_1296		chr1	210916187	210916733	RT4_GATA3_1_1296
	chr1	41673141	41673321	RT4_FOXA1_1297		chr1	210929536	210930119	RT4_GATA3_1_1297
	chr1	41703472	41703699	RT4_FOXA1_1298		chr1	211708655	211709095	RT4_GATA3_1_1298
	chr1	41704019	41704462	RT4_FOXA1_1299		chr1	211719562	211720184	RT4_GATA3_1_1299
	chr1	41705803	41706274	RT4_FOXA1_1300		chr1	211731517	211732026	RT4_GATA3_1_1300
	chr1	41715351	41715806	RT4_FOXA1_1301		chr1	211796859	211797317	RT4_GATA3_1_1301
	chr1	41728834	41729014	RT4_FOXA1_1302		chr1	211827156	211827788	RT4_GATA3_1_1302
	chr1	41744157	41744650	RT4_FOXA1_1303		chr1	212005811	212006396	RT4_GATA3_1_1303
	chr1	41781128	41781393	RT4_FOXA1_1304		chr1	212017611	212018074	RT4_GATA3_1_1304
	chr1	41788099	41788326	RT4_FOXA1_1305		chr1	212101505	212102113	RT4_GATA3_1_1305
	chr1	41807712	41808046	RT4_FOXA1_1306		chr1	212324050	212324617	RT4_GATA3_1_1306
	chr1	41819066	41819551	RT4_FOXA1_1307		chr1	212357416	212357875	RT4_GATA3_1_1307
	chr1	41824801	41825103	RT4_FOXA1_1308		chr1	212434520	212435114	RT4_GATA3_1_1308
	chr1	41826677	41827179	RT4_FOXA1_1309		chr1	212769318	212769907	RT4_GATA3_1_1309
	chr1	41890348	41891594	RT4_FOXA1_1310		chr1	212778572	212780052	RT4_GATA3_1_1310
	chr1	41915332	41915608	RT4_FOXA1_1311		chr1	212894728	212895209	RT4_GATA3_1_1311
	chr1	41948226	41948395	RT4_FOXA1_1312		chr1	212991939	212992520	RT4_GATA3_1_1312
	chr1	41966161	41966452	RT4_FOXA1_1313		chr1	213223558	213224263	RT4_GATA3_1_1313
	chr1	41967363	41967927	RT4_FOXA1_1314		chr1	213309406	213309966	RT4_GATA3_1_1314
	chr1	42044329	42044759	RT4_FOXA1_1315		chr1	213407472	213408038	RT4_GATA3_1_1315
	chr1	42088800	42089380	RT4_FOXA1_1316		chr1	213636475	213636992	RT4_GATA3_1_1316
	chr1	42127985	42128310	RT4_FOXA1_1317		chr1	213638271	213638876	RT4_GATA3_1_1317
	chr1	42131055	42131574	RT4_FOXA1_1318		chr1	213867251	213867771	RT4_GATA3_1_1318
	chr1	42131664	42131943	RT4_FOXA1_1319		chr1	214196015	214196648	RT4_GATA3_1_1319
	chr1	42133097	42133428	RT4_FOXA1_1320		chr1	214297683	214298213	RT4_GATA3_1_1320
	chr1	42136074	42136459	RT4_FOXA1_1321		chr1	214387556	214388087	RT4_GATA3_1_1321
	chr1	42137900	42138210	RT4_FOXA1_1322		chr1	214435815	214436318	RT4_GATA3_1_1322
	chr1	42151589	42151821	RT4_FOXA1_1323		chr1	214612886	214613854	RT4_GATA3_1_1323
	chr1	42156437	42156632	RT4_FOXA1_1324		chr1	214725393	214725926	RT4_GATA3_1_1324
	chr1	42235325	42235570	RT4_FOXA1_1325		chr1	214987559	214988084	RT4_GATA3_1_1325
	chr1	42237305	42237533	RT4_FOXA1_1326		chr1	215023229	215024149	RT4_GATA3_1_1326
	chr1	42249052	42249287	RT4_FOXA1_1327		chr1	215287314	215287810	RT4_GATA3_1_1327
	chr1	42256607	42256973	RT4_FOXA1_1328		chr1	215740179	215740748	RT4_GATA3_1_1328
	chr1	42309203	42309471	RT4_FOXA1_1329		chr1	215830242	215830867	RT4_GATA3_1_1329
	chr1	42314942	42315538	RT4_FOXA1_1330		chr1	216649099	216649622	RT4_GATA3_1_1330
	chr1	42316890	42317164	RT4_FOXA1_1331		chr1	216799900	216800433	RT4_GATA3_1_1331
	chr1	42317233	42317606	RT4_FOXA1_1332		chr1	216839641	216840267	RT4_GATA3_1_1332
	chr1	42328054	42328287	RT4_FOXA1_1333		chr1	217262492	217263055	RT4_GATA3_1_1333
	chr1	42346013	42346269	RT4_FOXA1_1334		chr1	217489314	217489952	RT4_GATA3_1_1334
	chr1	42357717	42357909	RT4_FOXA1_1335		chr1	217542767	217543819	RT4_GATA3_1_1335
	chr1	42381291	42381614	RT4_FOXA1_1336		chr1	217886160	217886944	RT4_GATA3_1_1336
	chr1	42402004	42402197	RT4_FOXA1_1337		chr1	218198721	218199226	RT4_GATA3_1_1337
	chr1	42402350	42402643	RT4_FOXA1_1338		chr1	218261310	218261934	RT4_GATA3_1_1338
	chr1	42500982	42501616	RT4_FOXA1_1339		chr1	218622815	218623334	RT4_GATA3_1_1339
	chr1	42525253	42525495	RT4_FOXA1_1340		chr1	218646757	218647367	RT4_GATA3_1_1340
	chr1	42552345	42552567	RT4_FOXA1_1341		chr1	218653996	218654543	RT4_GATA3_1_1341
	chr1	42612490	42613099	RT4_FOXA1_1342		chr1	218666064	218666642	RT4_GATA3_1_1342
	chr1	42631501	42632593	RT4_FOXA1_1343		chr1	218671408	218671947	RT4_GATA3_1_1343
	chr1	42632748	42633407	RT4_FOXA1_1344		chr1	218694855	218695406	RT4_GATA3_1_1344
	chr1	42638001	42638247	RT4_FOXA1_1345		chr1	218703119	218703630	RT4_GATA3_1_1345
	chr1	42639799	42640056	RT4_FOXA1_1346		chr1	218748084	218748595	RT4_GATA3_1_1346
	chr1	42643171	42643690	RT4_FOXA1_1347		chr1	219498179	219498800	RT4_GATA3_1_1347
	chr1	42672008	42672524	RT4_FOXA1_1348		chr1	219707696	219708253	RT4_GATA3_1_1348
	chr1	42672649	42672919	RT4_FOXA1_1349		chr1	219753669	219754365	RT4_GATA3_1_1349
	chr1	42680275	42680627	RT4_FOXA1_1350		chr1	219819222	219819683	RT4_GATA3_1_1350
	chr1	42693046	42693262	RT4_FOXA1_1351		chr1	219875827	219876367	RT4_GATA3_1_1351
	chr1	42703437	42703656	RT4_FOXA1_1352		chr1	219884328	219885180	RT4_GATA3_1_1352
	chr1	42731894	42732264	RT4_FOXA1_1353		chr1	219930952	219931559	RT4_GATA3_1_1353
	chr1	42805726	42806185	RT4_FOXA1_1354		chr1	220070352	220071125	RT4_GATA3_1_1354
	chr1	42812201	42812418	RT4_FOXA1_1355		chr1	220468271	220468834	RT4_GATA3_1_1355
	chr1	42859191	42860183	RT4_FOXA1_1356		chr1	220510634	220511226	RT4_GATA3_1_1356
	chr1	42891899	42892128	RT4_FOXA1_1357		chr1	220536840	220537776	RT4_GATA3_1_1357
	chr1	42903010	42903255	RT4_FOXA1_1358		chr1	220599138	220599704	RT4_GATA3_1_1358
	chr1	42905477	42906001	RT4_FOXA1_1359		chr1	220630820	220631735	RT4_GATA3_1_1359
	chr1	42961716	42962029	RT4_FOXA1_1360		chr1	220670590	220671146	RT4_GATA3_1_1360
	chr1	43018786	43019064	RT4_FOXA1_1361		chr1	220671514	220672060	RT4_GATA3_1_1361
	chr1	43123480	43123866	RT4_FOXA1_1362		chr1	220702631	220703317	RT4_GATA3_1_1362
	chr1	43142316	43142491	RT4_FOXA1_1363		chr1	220729222	220729746	RT4_GATA3_1_1363
	chr1	43148453	43149051	RT4_FOXA1_1364		chr1	220738789	220739473	RT4_GATA3_1_1364
	chr1	43153937	43154298	RT4_FOXA1_1365		chr1	220804494	220805082	RT4_GATA3_1_1365
	chr1	43282642	43283193	RT4_FOXA1_1366		chr1	220907470	220908031	RT4_GATA3_1_1366
	chr1	43300121	43300371	RT4_FOXA1_1367		chr1	221139493	221140194	RT4_GATA3_1_1367
	chr1	43315454	43315880	RT4_FOXA1_1368		chr1	221209157	221209629	RT4_GATA3_1_1368
	chr1	43378882	43379286	RT4_FOXA1_1369		chr1	221508654	221509246	RT4_GATA3_1_1369
	chr1	43402878	43403172	RT4_FOXA1_1370		chr1	221643164	221644108	RT4_GATA3_1_1370
	chr1	43429562	43430138	RT4_FOXA1_1371		chr1	221740034	221741164	RT4_GATA3_1_1371
	chr1	43431952	43432252	RT4_FOXA1_1372		chr1	221778860	221779455	RT4_GATA3_1_1372
	chr1	43462086	43462384	RT4_FOXA1_1373		chr1	221785327	221785904	RT4_GATA3_1_1373
	chr1	43462632	43463060	RT4_FOXA1_1374		chr1	221931625	221932248	RT4_GATA3_1_1374
	chr1	43463572	43463829	RT4_FOXA1_1375		chr1	222013261	222013811	RT4_GATA3_1_1375
	chr1	43465549	43465849	RT4_FOXA1_1376		chr1	222060431	222061044	RT4_GATA3_1_1376
	chr1	43472219	43472457	RT4_FOXA1_1377		chr1	222070480	222071057	RT4_GATA3_1_1377
	chr1	43475464	43475663	RT4_FOXA1_1378		chr1	222138666	222139209	RT4_GATA3_1_1378
	chr1	43477921	43478778	RT4_FOXA1_1379		chr1	222657277	222657861	RT4_GATA3_1_1379
	chr1	43502550	43502963	RT4_FOXA1_1380		chr1	222887717	222888271	RT4_GATA3_1_1380
	chr1	43505070	43505506	RT4_FOXA1_1381		chr1	222958125	222958685	RT4_GATA3_1_1381
	chr1	43585739	43585937	RT4_FOXA1_1382		chr1	223417888	223418417	RT4_GATA3_1_1382
	chr1	43586500	43586737	RT4_FOXA1_1383		chr1	223826856	223827457	RT4_GATA3_1_1383
	chr1	43667028	43667257	RT4_FOXA1_1384		chr1	223842727	223843368	RT4_GATA3_1_1384
	chr1	43668712	43668904	RT4_FOXA1_1385		chr1	223858464	223859475	RT4_GATA3_1_1385
	chr1	43712524	43712881	RT4_FOXA1_1386		chr1	223894066	223894665	RT4_GATA3_1_1386
	chr1	43722523	43722834	RT4_FOXA1_1387		chr1	223963643	223964256	RT4_GATA3_1_1387
	chr1	43750812	43751404	RT4_FOXA1_1388		chr1	224191517	224192005	RT4_GATA3_1_1388
	chr1	43760149	43760432	RT4_FOXA1_1389		chr1	224392410	224392938	RT4_GATA3_1_1389
	chr1	43761190	43761719	RT4_FOXA1_1390		chr1	224480043	224480627	RT4_GATA3_1_1390
	chr1	43770669	43771127	RT4_FOXA1_1391		chr1	224521533	224522129	RT4_GATA3_1_1391
	chr1	43779462	43779995	RT4_FOXA1_1392		chr1	224698615	224699191	RT4_GATA3_1_1392
	chr1	43832763	43833134	RT4_FOXA1_1393		chr1	224730501	224731113	RT4_GATA3_1_1393
	chr1	43833418	43833700	RT4_FOXA1_1394		chr1	224970458	224971213	RT4_GATA3_1_1394
	chr1	43860404	43860592	RT4_FOXA1_1395		chr1	224989564	224990113	RT4_GATA3_1_1395
	chr1	43861792	43862252	RT4_FOXA1_1396		chr1	225013108	225013621	RT4_GATA3_1_1396
	chr1	43919156	43919621	RT4_FOXA1_1397		chr1	225082679	225083246	RT4_GATA3_1_1397
	chr1	43988778	43989136	RT4_FOXA1_1398		chr1	225116902	225117416	RT4_GATA3_1_1398
	chr1	43996290	43996693	RT4_FOXA1_1399		chr1	225324734	225325362	RT4_GATA3_1_1399
	chr1	43997181	43997426	RT4_FOXA1_1400		chr1	225337711	225338199	RT4_GATA3_1_1400
	chr1	44015916	44016191	RT4_FOXA1_1401		chr1	225389039	225389616	RT4_GATA3_1_1401
	chr1	44024966	44025666	RT4_FOXA1_1402		chr1	225413596	225414167	RT4_GATA3_1_1402
	chr1	44030125	44030728	RT4_FOXA1_1403		chr1	225441435	225441966	RT4_GATA3_1_1403
	chr1	44031489	44031962	RT4_FOXA1_1404		chr1	225834355	225834948	RT4_GATA3_1_1404
	chr1	44048061	44048282	RT4_FOXA1_1405		chr1	225845138	225845725	RT4_GATA3_1_1405
	chr1	44056814	44057010	RT4_FOXA1_1406		chr1	225881707	225882320	RT4_GATA3_1_1406
	chr1	44120240	44120633	RT4_FOXA1_1407		chr1	225942242	225943363	RT4_GATA3_1_1407
	chr1	44170318	44170626	RT4_FOXA1_1408		chr1	225954051	225954486	RT4_GATA3_1_1408
	chr1	44172639	44173422	RT4_FOXA1_1409		chr1	225956613	225957241	RT4_GATA3_1_1409
	chr1	44223063	44223898	RT4_FOXA1_1410		chr1	226014368	226015375	RT4_GATA3_1_1410
	chr1	44231351	44231633	RT4_FOXA1_1411		chr1	226186955	226187425	RT4_GATA3_1_1411
	chr1	44295573	44295767	RT4_FOXA1_1412		chr1	226515294	226515828	RT4_GATA3_1_1412
	chr1	44299836	44300208	RT4_FOXA1_1413		chr1	226666342	226667441	RT4_GATA3_1_1413
	chr1	44301836	44302101	RT4_FOXA1_1414		chr1	226914449	226915013	RT4_GATA3_1_1414
	chr1	44318802	44319220	RT4_FOXA1_1415		chr1	227442511	227443288	RT4_GATA3_1_1415
	chr1	44330559	44330925	RT4_FOXA1_1416		chr1	227458695	227459315	RT4_GATA3_1_1416
	chr1	44340305	44340587	RT4_FOXA1_1417		chr1	227511030	227511674	RT4_GATA3_1_1417
	chr1	44441023	44441564	RT4_FOXA1_1418		chr1	227584022	227585273	RT4_GATA3_1_1418
	chr1	44444618	44445013	RT4_FOXA1_1419		chr1	227589827	227590375	RT4_GATA3_1_1419
	chr1	44452930	44453184	RT4_FOXA1_1420		chr1	227766471	227767759	RT4_GATA3_1_1420
	chr1	44490656	44490929	RT4_FOXA1_1421		chr1	228063041	228063545	RT4_GATA3_1_1421
	chr1	44496379	44497010	RT4_FOXA1_1422		chr1	228416382	228416983	RT4_GATA3_1_1422
	chr1	44513400	44513858	RT4_FOXA1_1423		chr1	228608737	228609296	RT4_GATA3_1_1423
	chr1	44514386	44514615	RT4_FOXA1_1424		chr1	228783425	228784134	RT4_GATA3_1_1424
	chr1	44555464	44555767	RT4_FOXA1_1425		chr1	228887428	228887942	RT4_GATA3_1_1425
	chr1	44621088	44621355	RT4_FOXA1_1426		chr1	228996859	228997462	RT4_GATA3_1_1426
	chr1	44664446	44664690	RT4_FOXA1_1427		chr1	229041665	229042530	RT4_GATA3_1_1427
	chr1	44726469	44726752	RT4_FOXA1_1428		chr1	229050647	229051472	RT4_GATA3_1_1428
	chr1	44749118	44749618	RT4_FOXA1_1429		chr1	229231366	229231861	RT4_GATA3_1_1429
	chr1	44776565	44776764	RT4_FOXA1_1430		chr1	229359250	229359838	RT4_GATA3_1_1430
	chr1	44793660	44794101	RT4_FOXA1_1431		chr1	229389309	229389850	RT4_GATA3_1_1431
	chr1	44870698	44871118	RT4_FOXA1_1432		chr1	229408802	229409231	RT4_GATA3_1_1432
	chr1	44873243	44873449	RT4_FOXA1_1433		chr1	229415894	229416508	RT4_GATA3_1_1433
	chr1	44879703	44879979	RT4_FOXA1_1434		chr1	229528915	229529408	RT4_GATA3_1_1434
	chr1	44883441	44883696	RT4_FOXA1_1435		chr1	229543020	229543498	RT4_GATA3_1_1435
	chr1	44977442	44977817	RT4_FOXA1_1436		chr1	229714301	229714919	RT4_GATA3_1_1436
	chr1	44980372	44980691	RT4_FOXA1_1437		chr1	230118566	230119095	RT4_GATA3_1_1437
	chr1	44997672	44997893	RT4_FOXA1_1438		chr1	230124196	230124747	RT4_GATA3_1_1438
	chr1	45011660	45011921	RT4_FOXA1_1439		chr1	230209110	230209656	RT4_GATA3_1_1439
	chr1	45040450	45040697	RT4_FOXA1_1440		chr1	230895988	230896418	RT4_GATA3_1_1440
	chr1	45063010	45063208	RT4_FOXA1_1441		chr1	231102107	231102655	RT4_GATA3_1_1441
	chr1	45122633	45122933	RT4_FOXA1_1442		chr1	231108433	231108974	RT4_GATA3_1_1442
	chr1	45147861	45148080	RT4_FOXA1_1443		chr1	231114727	231115312	RT4_GATA3_1_1443
	chr1	45166032	45166588	RT4_FOXA1_1444		chr1	231173626	231174210	RT4_GATA3_1_1444
	chr1	45166755	45167661	RT4_FOXA1_1445		chr1	231647863	231648407	RT4_GATA3_1_1445
	chr1	45169061	45169335	RT4_FOXA1_1446		chr1	231652762	231653252	RT4_GATA3_1_1446
	chr1	45178966	45179211	RT4_FOXA1_1447		chr1	231946977	231947412	RT4_GATA3_1_1447
	chr1	45196184	45196473	RT4_FOXA1_1448		chr1	231947654	231948403	RT4_GATA3_1_1448
	chr1	45256827	45257076	RT4_FOXA1_1449		chr1	232087131	232087655	RT4_GATA3_1_1449
	chr1	45265929	45266423	RT4_FOXA1_1450		chr1	232292816	232293329	RT4_GATA3_1_1450
	chr1	45365036	45365253	RT4_FOXA1_1451		chr1	232523121	232523791	RT4_GATA3_1_1451
	chr1	45383403	45383568	RT4_FOXA1_1452		chr1	232549215	232549834	RT4_GATA3_1_1452
	chr1	45428480	45428715	RT4_FOXA1_1453		chr1	232557966	232558533	RT4_GATA3_1_1453
	chr1	45562090	45562314	RT4_FOXA1_1454		chr1	232643297	232643756	RT4_GATA3_1_1454
	chr1	45635934	45636313	RT4_FOXA1_1455		chr1	232729648	232730247	RT4_GATA3_1_1455
	chr1	45637709	45638013	RT4_FOXA1_1456		chr1	232736456	232737015	RT4_GATA3_1_1456
	chr1	45671856	45672670	RT4_FOXA1_1457		chr1	233019218	233019943	RT4_GATA3_1_1457
	chr1	45712255	45712729	RT4_FOXA1_1458		chr1	233041345	233041942	RT4_GATA3_1_1458
	chr1	45732018	45732487	RT4_FOXA1_1459		chr1	233392113	233392959	RT4_GATA3_1_1459
	chr1	45779697	45779928	RT4_FOXA1_1460		chr1	233723813	233724454	RT4_GATA3_1_1460
	chr1	45792949	45793196	RT4_FOXA1_1461		chr1	233771685	233772375	RT4_GATA3_1_1461
	chr1	45801333	45802038	RT4_FOXA1_1462		chr1	233790279	233790854	RT4_GATA3_1_1462
	chr1	45804719	45805306	RT4_FOXA1_1463		chr1	233926758	233927331	RT4_GATA3_1_1463
	chr1	45826368	45826906	RT4_FOXA1_1464		chr1	233936518	233937015	RT4_GATA3_1_1464
	chr1	45839256	45839500	RT4_FOXA1_1465		chr1	234149881	234150385	RT4_GATA3_1_1465
	chr1	45850134	45850347	RT4_FOXA1_1466		chr1	234737229	234737813	RT4_GATA3_1_1466
	chr1	45859355	45859558	RT4_FOXA1_1467		chr1	234763722	234764221	RT4_GATA3_1_1467
	chr1	45867466	45867914	RT4_FOXA1_1468		chr1	234791225	234791691	RT4_GATA3_1_1468
	chr1	45868643	45869389	RT4_FOXA1_1469		chr1	234792644	234793190	RT4_GATA3_1_1469
	chr1	45873525	45873942	RT4_FOXA1_1470		chr1	234819934	234820458	RT4_GATA3_1_1470
	chr1	45900560	45900782	RT4_FOXA1_1471		chr1	234847222	234848209	RT4_GATA3_1_1471
	chr1	45909014	45909502	RT4_FOXA1_1472		chr1	234859398	234859890	RT4_GATA3_1_1472
	chr1	45952253	45952731	RT4_FOXA1_1473		chr1	234935713	234936193	RT4_GATA3_1_1473
	chr1	45956755	45957303	RT4_FOXA1_1474		chr1	234961060	234961789	RT4_GATA3_1_1474
	chr1	45967838	45968057	RT4_FOXA1_1475		chr1	234966913	234967397	RT4_GATA3_1_1475
	chr1	45990844	45991154	RT4_FOXA1_1476		chr1	235094677	235095254	RT4_GATA3_1_1476
	chr1	45991703	45992196	RT4_FOXA1_1477		chr1	235097352	235097771	RT4_GATA3_1_1477
	chr1	46022444	46022888	RT4_FOXA1_1478		chr1	235110680	235111284	RT4_GATA3_1_1478
	chr1	46067366	46067574	RT4_FOXA1_1479		chr1	235166467	235167497	RT4_GATA3_1_1479
	chr1	46067655	46067840	RT4_FOXA1_1480		chr1	235441358	235441851	RT4_GATA3_1_1480
	chr1	46088782	46089139	RT4_FOXA1_1481		chr1	235459319	235459849	RT4_GATA3_1_1481
	chr1	46109825	46110180	RT4_FOXA1_1482		chr1	235663909	235664791	RT4_GATA3_1_1482
	chr1	46145819	46146238	RT4_FOXA1_1483		chr1	235676691	235677280	RT4_GATA3_1_1483
	chr1	46146738	46146938	RT4_FOXA1_1484		chr1	236033060	236033837	RT4_GATA3_1_1484
	chr1	46149536	46149935	RT4_FOXA1_1485		chr1	236041189	236041758	RT4_GATA3_1_1485
	chr1	46151083	46151391	RT4_FOXA1_1486		chr1	236059518	236060012	RT4_GATA3_1_1486
	chr1	46163544	46163766	RT4_FOXA1_1487		chr1	236073915	236074412	RT4_GATA3_1_1487
	chr1	46206124	46206293	RT4_FOXA1_1488		chr1	236080718	236081530	RT4_GATA3_1_1488
	chr1	46212483	46212972	RT4_FOXA1_1489		chr1	236095364	236095998	RT4_GATA3_1_1489
	chr1	46216410	46216646	RT4_FOXA1_1490		chr1	236106338	236106890	RT4_GATA3_1_1490
	chr1	46231766	46232041	RT4_FOXA1_1491		chr1	236162678	236163262	RT4_GATA3_1_1491
	chr1	46269055	46269412	RT4_FOXA1_1492		chr1	236247049	236247711	RT4_GATA3_1_1492
	chr1	46309846	46310057	RT4_FOXA1_1493		chr1	236519372	236519930	RT4_GATA3_1_1493
	chr1	46325785	46326146	RT4_FOXA1_1494		chr1	236552357	236553023	RT4_GATA3_1_1494
	chr1	46349957	46350175	RT4_FOXA1_1495		chr1	236557313	236557786	RT4_GATA3_1_1495
	chr1	46350477	46350767	RT4_FOXA1_1496		chr1	236618364	236618937	RT4_GATA3_1_1496
	chr1	46403789	46404136	RT4_FOXA1_1497		chr1	236678242	236678798	RT4_GATA3_1_1497
	chr1	46439450	46439731	RT4_FOXA1_1498		chr1	236680097	236680666	RT4_GATA3_1_1498
	chr1	46440671	46441440	RT4_FOXA1_1499		chr1	236695408	236696066	RT4_GATA3_1_1499
	chr1	46444730	46445387	RT4_FOXA1_1500		chr1	236714790	236715239	RT4_GATA3_1_1500
	chr1	46470907	46471162	RT4_FOXA1_1501		chr1	237068312	237069046	RT4_GATA3_1_1501
	chr1	46493546	46493980	RT4_FOXA1_1502		chr1	237344966	237345479	RT4_GATA3_1_1502
	chr1	46504761	46505374	RT4_FOXA1_1503		chr1	237977784	237978622	RT4_GATA3_1_1503
	chr1	46515556	46515928	RT4_FOXA1_1504		chr1	238170026	238170524	RT4_GATA3_1_1504
	chr1	46519524	46520130	RT4_FOXA1_1505		chr1	239247460	239248333	RT4_GATA3_1_1505
	chr1	46520991	46521216	RT4_FOXA1_1506		chr1	239880372	239881122	RT4_GATA3_1_1506
	chr1	46562405	46562722	RT4_FOXA1_1507		chr1	239972990	239973510	RT4_GATA3_1_1507
	chr1	46593915	46594358	RT4_FOXA1_1508		chr1	240851123	240851652	RT4_GATA3_1_1508
	chr1	46620742	46621527	RT4_FOXA1_1509		chr1	241299558	241300176	RT4_GATA3_1_1509
	chr1	46645181	46645905	RT4_FOXA1_1510		chr1	241319356	241320357	RT4_GATA3_1_1510
	chr1	46647493	46648024	RT4_FOXA1_1511		chr1	241660062	241660705	RT4_GATA3_1_1511
	chr1	46648607	46649069	RT4_FOXA1_1512		chr1	241754830	241755551	RT4_GATA3_1_1512
	chr1	46676517	46676746	RT4_FOXA1_1513		chr1	241771929	241772483	RT4_GATA3_1_1513
	chr1	46676977	46677301	RT4_FOXA1_1514		chr1	241800694	241801266	RT4_GATA3_1_1514
	chr1	46684093	46684591	RT4_FOXA1_1515		chr1	241970099	241970665	RT4_GATA3_1_1515
	chr1	46684677	46685012	RT4_FOXA1_1516		chr1	242187614	242188222	RT4_GATA3_1_1516
	chr1	46689113	46689355	RT4_FOXA1_1517		chr1	242378982	242379522	RT4_GATA3_1_1517
	chr1	46727893	46728133	RT4_FOXA1_1518		chr1	242487539	242488111	RT4_GATA3_1_1518
	chr1	46756498	46756742	RT4_FOXA1_1519		chr1	242558596	242559119	RT4_GATA3_1_1519
	chr1	46770017	46770214	RT4_FOXA1_1520		chr1	242602338	242602902	RT4_GATA3_1_1520
	chr1	46780765	46781653	RT4_FOXA1_1521		chr1	243596151	243596792	RT4_GATA3_1_1521
	chr1	46799356	46799536	RT4_FOXA1_1522		chr1	243677026	243677757	RT4_GATA3_1_1522
	chr1	46804618	46805261	RT4_FOXA1_1523		chr1	243949712	243950300	RT4_GATA3_1_1523
	chr1	46805532	46805877	RT4_FOXA1_1524		chr1	244715628	244716207	RT4_GATA3_1_1524
	chr1	46813192	46813662	RT4_FOXA1_1525		chr1	244883001	244883626	RT4_GATA3_1_1525
	chr1	46861062	46861256	RT4_FOXA1_1526		chr1	244903135	244903933	RT4_GATA3_1_1526
	chr1	46862165	46862548	RT4_FOXA1_1527		chr1	244984369	244984914	RT4_GATA3_1_1527
	chr1	46867950	46868301	RT4_FOXA1_1528		chr1	245063060	245063624	RT4_GATA3_1_1528
	chr1	46872122	46872331	RT4_FOXA1_1529		chr1	245133408	245133978	RT4_GATA3_1_1529
	chr1	46932626	46932864	RT4_FOXA1_1530		chr1	245141688	245142254	RT4_GATA3_1_1530
	chr1	46943040	46943368	RT4_FOXA1_1531		chr1	245206163	245206730	RT4_GATA3_1_1531
	chr1	46954940	46955217	RT4_FOXA1_1532		chr1	245475093	245475706	RT4_GATA3_1_1532
	chr1	46982339	46982634	RT4_FOXA1_1533		chr1	245520100	245520936	RT4_GATA3_1_1533
	chr1	46986050	46986428	RT4_FOXA1_1534		chr1	245675476	245676280	RT4_GATA3_1_1534
	chr1	46987862	46988719	RT4_FOXA1_1535		chr1	245764077	245764616	RT4_GATA3_1_1535
	chr1	46989494	46989859	RT4_FOXA1_1536		chr1	245887216	245888273	RT4_GATA3_1_1536
	chr1	46998614	46998804	RT4_FOXA1_1537		chr1	246150091	246150727	RT4_GATA3_1_1537
	chr1	47005945	47006164	RT4_FOXA1_1538		chr1	246303008	246303645	RT4_GATA3_1_1538
	chr1	47104757	47105076	RT4_FOXA1_1539		chr1	246305554	246306092	RT4_GATA3_1_1539
	chr1	47109110	47109381	RT4_FOXA1_1540		chr1	246329387	246329980	RT4_GATA3_1_1540
	chr1	47145178	47145381	RT4_FOXA1_1541		chr1	246660550	246661167	RT4_GATA3_1_1541
	chr1	47169719	47170219	RT4_FOXA1_1542		chr1	246666415	246667006	RT4_GATA3_1_1542
	chr1	47171178	47171350	RT4_FOXA1_1543		chr1	246728241	246728931	RT4_GATA3_1_1543
	chr1	47180769	47181098	RT4_FOXA1_1544		chr1	246758398	246758909	RT4_GATA3_1_1544
	chr1	47184761	47185913	RT4_FOXA1_1545		chr1	246772774	246773343	RT4_GATA3_1_1545
	chr1	47187515	47187821	RT4_FOXA1_1546		chr1	246785235	246785738	RT4_GATA3_1_1546
	chr1	47194218	47194598	RT4_FOXA1_1547		chr1	246868653	246869125	RT4_GATA3_1_1547
	chr1	47223685	47224016	RT4_FOXA1_1548		chr1	246872902	246873558	RT4_GATA3_1_1548
	chr1	47254092	47254661	RT4_FOXA1_1549		chr1	247241932	247242483	RT4_GATA3_1_1549
	chr1	47255943	47256158	RT4_FOXA1_1550		chr1	247267491	247268100	RT4_GATA3_1_1550
	chr1	47262716	47262908	RT4_FOXA1_1551		chr1	247532642	247533235	RT4_GATA3_1_1551
	chr1	47263718	47264030	RT4_FOXA1_1552		chr1	247660124	247660720	RT4_GATA3_1_1552
	chr1	47267772	47268084	RT4_FOXA1_1553		chr1	247691893	247692481	RT4_GATA3_1_1553
	chr1	47296368	47296647	RT4_FOXA1_1554		chr1	249167279	249167837	RT4_GATA3_1_1554
	chr1	47369251	47369640	RT4_FOXA1_1555		chr10	133048	133653	RT4_GATA3_1_1555
	chr1	47412766	47412948	RT4_FOXA1_1556		chr10	311714	312192	RT4_GATA3_1_1556
	chr1	47464546	47464812	RT4_FOXA1_1557		chr10	592728	593805	RT4_GATA3_1_1557
	chr1	47496717	47497041	RT4_FOXA1_1558		chr10	1029896	1030506	RT4_GATA3_1_1558
	chr1	47557189	47557456	RT4_FOXA1_1559		chr10	1401342	1401864	RT4_GATA3_1_1559
	chr1	47639498	47639798	RT4_FOXA1_1560		chr10	3085419	3086074	RT4_GATA3_1_1560
	chr1	47715142	47715912	RT4_FOXA1_1561		chr10	3239724	3240308	RT4_GATA3_1_1561
	chr1	47717996	47718600	RT4_FOXA1_1562		chr10	3528504	3529090	RT4_GATA3_1_1562
	chr1	47719600	47720047	RT4_FOXA1_1563		chr10	3570029	3570585	RT4_GATA3_1_1563
	chr1	47730689	47730995	RT4_FOXA1_1564		chr10	3674078	3674647	RT4_GATA3_1_1564
	chr1	47780509	47780682	RT4_FOXA1_1565		chr10	3805065	3805622	RT4_GATA3_1_1565
	chr1	47798865	47799658	RT4_FOXA1_1566		chr10	3847912	3848485	RT4_GATA3_1_1566
	chr1	47805786	47806227	RT4_FOXA1_1567		chr10	3917856	3918443	RT4_GATA3_1_1567
	chr1	47820348	47820568	RT4_FOXA1_1568		chr10	3934482	3935010	RT4_GATA3_1_1568
	chr1	47914177	47914577	RT4_FOXA1_1569		chr10	3948458	3948973	RT4_GATA3_1_1569
	chr1	47920318	47920625	RT4_FOXA1_1570		chr10	3953831	3954524	RT4_GATA3_1_1570
	chr1	47943666	47944278	RT4_FOXA1_1571		chr10	3984777	3985306	RT4_GATA3_1_1571
	chr1	47973804	47974416	RT4_FOXA1_1572		chr10	4006495	4006958	RT4_GATA3_1_1572
	chr1	48002472	48002942	RT4_FOXA1_1573		chr10	4019193	4019717	RT4_GATA3_1_1573
	chr1	48035255	48035776	RT4_FOXA1_1574		chr10	4103593	4104278	RT4_GATA3_1_1574
	chr1	48115878	48116202	RT4_FOXA1_1575		chr10	4140852	4141457	RT4_GATA3_1_1575
	chr1	48130522	48130940	RT4_FOXA1_1576		chr10	4173672	4174428	RT4_GATA3_1_1576
	chr1	48175244	48175604	RT4_FOXA1_1577		chr10	4284701	4285234	RT4_GATA3_1_1577
	chr1	48190579	48191334	RT4_FOXA1_1578		chr10	4322942	4323575	RT4_GATA3_1_1578
	chr1	48275505	48275995	RT4_FOXA1_1579		chr10	4492909	4493610	RT4_GATA3_1_1579
	chr1	48354970	48355303	RT4_FOXA1_1580		chr10	4746304	4746958	RT4_GATA3_1_1580
	chr1	48406928	48407165	RT4_FOXA1_1581		chr10	4778220	4778779	RT4_GATA3_1_1581
	chr1	48460944	48461481	RT4_FOXA1_1582		chr10	5053227	5053671	RT4_GATA3_1_1582
	chr1	48469526	48469731	RT4_FOXA1_1583		chr10	5067094	5068317	RT4_GATA3_1_1583
	chr1	48471900	48472551	RT4_FOXA1_1584		chr10	5121961	5122541	RT4_GATA3_1_1584
	chr1	48483469	48483731	RT4_FOXA1_1585		chr10	5190200	5190916	RT4_GATA3_1_1585
	chr1	48498478	48498739	RT4_FOXA1_1586		chr10	5590629	5591219	RT4_GATA3_1_1586
	chr1	48586337	48586624	RT4_FOXA1_1587		chr10	5621439	5621967	RT4_GATA3_1_1587
	chr1	48667882	48668348	RT4_FOXA1_1588		chr10	6052957	6053499	RT4_GATA3_1_1588
	chr1	48692795	48693542	RT4_FOXA1_1589		chr10	6183186	6183837	RT4_GATA3_1_1589
	chr1	48702588	48702753	RT4_FOXA1_1590		chr10	6334559	6335043	RT4_GATA3_1_1590
	chr1	48733901	48734096	RT4_FOXA1_1591		chr10	6338765	6339293	RT4_GATA3_1_1591
	chr1	48775260	48775452	RT4_FOXA1_1592		chr10	6444805	6445410	RT4_GATA3_1_1592
	chr1	48856920	48857100	RT4_FOXA1_1593		chr10	6645416	6646068	RT4_GATA3_1_1593
	chr1	48916157	48916421	RT4_FOXA1_1594		chr10	6763832	6764700	RT4_GATA3_1_1594
	chr1	48957015	48957240	RT4_FOXA1_1595		chr10	6933909	6934384	RT4_GATA3_1_1595
	chr1	49002234	49002507	RT4_FOXA1_1596		chr10	6954030	6954772	RT4_GATA3_1_1596
	chr1	49017890	49018209	RT4_FOXA1_1597		chr10	7536444	7536934	RT4_GATA3_1_1597
	chr1	49132606	49132890	RT4_FOXA1_1598		chr10	8068775	8069259	RT4_GATA3_1_1598
	chr1	49182935	49183461	RT4_FOXA1_1599		chr10	8079660	8080259	RT4_GATA3_1_1599
	chr1	49209736	49210247	RT4_FOXA1_1600		chr10	8090574	8091147	RT4_GATA3_1_1600
	chr1	49242176	49242431	RT4_FOXA1_1601		chr10	8270998	8271561	RT4_GATA3_1_1601
	chr1	49243030	49243348	RT4_FOXA1_1602		chr10	8391725	8392323	RT4_GATA3_1_1602
	chr1	49244257	49244501	RT4_FOXA1_1603		chr10	8408315	8408752	RT4_GATA3_1_1603
	chr1	49302340	49302590	RT4_FOXA1_1604		chr10	8449353	8450132	RT4_GATA3_1_1604
	chr1	49383902	49384081	RT4_FOXA1_1605		chr10	8515576	8516045	RT4_GATA3_1_1605
	chr1	49397069	49397535	RT4_FOXA1_1606		chr10	8635396	8636089	RT4_GATA3_1_1606
	chr1	49398363	49398703	RT4_FOXA1_1607		chr10	8670153	8670849	RT4_GATA3_1_1607
	chr1	49494257	49494554	RT4_FOXA1_1608		chr10	8768360	8768934	RT4_GATA3_1_1608
	chr1	49573254	49573487	RT4_FOXA1_1609		chr10	8806066	8806605	RT4_GATA3_1_1609
	chr1	49625449	49625716	RT4_FOXA1_1610		chr10	9002532	9003008	RT4_GATA3_1_1610
	chr1	49626470	49626675	RT4_FOXA1_1611		chr10	9230272	9230848	RT4_GATA3_1_1611
	chr1	49639489	49639654	RT4_FOXA1_1612		chr10	9271526	9272123	RT4_GATA3_1_1612
	chr1	49649213	49649455	RT4_FOXA1_1613		chr10	9281160	9281901	RT4_GATA3_1_1613
	chr1	49800780	49801238	RT4_FOXA1_1614		chr10	9287482	9287937	RT4_GATA3_1_1614
	chr1	49806305	49806561	RT4_FOXA1_1615		chr10	9304621	9305228	RT4_GATA3_1_1615
	chr1	49812495	49813121	RT4_FOXA1_1616		chr10	11644857	11645380	RT4_GATA3_1_1616
	chr1	49837416	49837678	RT4_FOXA1_1617		chr10	11704544	11705173	RT4_GATA3_1_1617
	chr1	49858240	49858515	RT4_FOXA1_1618		chr10	11729261	11729855	RT4_GATA3_1_1618
	chr1	49878908	49879205	RT4_FOXA1_1619		chr10	11817872	11818353	RT4_GATA3_1_1619
	chr1	49882410	49882684	RT4_FOXA1_1620		chr10	12490700	12491298	RT4_GATA3_1_1620
	chr1	49920639	49920963	RT4_FOXA1_1621		chr10	12545264	12545892	RT4_GATA3_1_1621
	chr1	49934591	49934905	RT4_FOXA1_1622		chr10	12576769	12577309	RT4_GATA3_1_1622
	chr1	49947553	49947741	RT4_FOXA1_1623		chr10	12762272	12762865	RT4_GATA3_1_1623
	chr1	50089405	50089838	RT4_FOXA1_1624		chr10	12891721	12892151	RT4_GATA3_1_1624
	chr1	50230691	50231037	RT4_FOXA1_1625		chr10	13800276	13800768	RT4_GATA3_1_1625
	chr1	50436371	50436548	RT4_FOXA1_1626		chr10	13924041	13924607	RT4_GATA3_1_1626
	chr1	50614555	50615154	RT4_FOXA1_1627		chr10	13966251	13966775	RT4_GATA3_1_1627
	chr1	50694600	50694953	RT4_FOXA1_1628		chr10	14050238	14050810	RT4_GATA3_1_1628
	chr1	50712152	50712507	RT4_FOXA1_1629		chr10	14089329	14089785	RT4_GATA3_1_1629
	chr1	50742585	50742768	RT4_FOXA1_1630		chr10	14116325	14116886	RT4_GATA3_1_1630
	chr1	50745691	50745987	RT4_FOXA1_1631		chr10	14630855	14631353	RT4_GATA3_1_1631
	chr1	50887708	50887970	RT4_FOXA1_1632		chr10	14647066	14647823	RT4_GATA3_1_1632
	chr1	50895401	50895605	RT4_FOXA1_1633		chr10	15165581	15166130	RT4_GATA3_1_1633
	chr1	50896275	50896698	RT4_FOXA1_1634		chr10	15475819	15476340	RT4_GATA3_1_1634
	chr1	50940600	50940886	RT4_FOXA1_1635		chr10	15920988	15921492	RT4_GATA3_1_1635
	chr1	50995877	50996062	RT4_FOXA1_1636		chr10	16482632	16483713	RT4_GATA3_1_1636
	chr1	51004114	51004378	RT4_FOXA1_1637		chr10	17157589	17158150	RT4_GATA3_1_1637
	chr1	51056102	51056361	RT4_FOXA1_1638		chr10	17241344	17241919	RT4_GATA3_1_1638
	chr1	51069233	51069883	RT4_FOXA1_1639		chr10	17430129	17430704	RT4_GATA3_1_1639
	chr1	51076455	51076912	RT4_FOXA1_1640		chr10	17697456	17698091	RT4_GATA3_1_1640
	chr1	51096386	51096636	RT4_FOXA1_1641		chr10	18689223	18689766	RT4_GATA3_1_1641
	chr1	51096989	51097173	RT4_FOXA1_1642		chr10	18940191	18940779	RT4_GATA3_1_1642
	chr1	51099455	51099648	RT4_FOXA1_1643		chr10	21473720	21474191	RT4_GATA3_1_1643
	chr1	51103096	51103431	RT4_FOXA1_1644		chr10	21531746	21532381	RT4_GATA3_1_1644
	chr1	51111427	51111636	RT4_FOXA1_1645		chr10	21623864	21624397	RT4_GATA3_1_1645
	chr1	51198413	51198720	RT4_FOXA1_1646		chr10	21629239	21629712	RT4_GATA3_1_1646
	chr1	51294307	51294495	RT4_FOXA1_1647		chr10	21656902	21657430	RT4_GATA3_1_1647
	chr1	51301854	51302071	RT4_FOXA1_1648		chr10	21752932	21753501	RT4_GATA3_1_1648
	chr1	51340384	51340573	RT4_FOXA1_1649		chr10	22040094	22040696	RT4_GATA3_1_1649
	chr1	51387890	51388120	RT4_FOXA1_1650		chr10	22535232	22535790	RT4_GATA3_1_1650
	chr1	51425992	51426450	RT4_FOXA1_1651		chr10	23631040	23631519	RT4_GATA3_1_1651
	chr1	51443482	51443830	RT4_FOXA1_1652		chr10	23634708	23635186	RT4_GATA3_1_1652
	chr1	51495323	51495665	RT4_FOXA1_1653		chr10	23709808	23710320	RT4_GATA3_1_1653
	chr1	51498555	51499115	RT4_FOXA1_1654		chr10	23710815	23711377	RT4_GATA3_1_1654
	chr1	51559230	51559612	RT4_FOXA1_1655		chr10	23803191	23803773	RT4_GATA3_1_1655
	chr1	51568986	51569430	RT4_FOXA1_1656		chr10	24528827	24529364	RT4_GATA3_1_1656
	chr1	51628615	51629001	RT4_FOXA1_1657		chr10	24588714	24589167	RT4_GATA3_1_1657
	chr1	51636022	51636395	RT4_FOXA1_1658		chr10	24907180	24907744	RT4_GATA3_1_1658
	chr1	51677798	51678173	RT4_FOXA1_1659		chr10	25105721	25106292	RT4_GATA3_1_1659
	chr1	51681621	51681843	RT4_FOXA1_1660		chr10	25174884	25175734	RT4_GATA3_1_1660
	chr1	51682740	51683210	RT4_FOXA1_1661		chr10	25180672	25181188	RT4_GATA3_1_1661
	chr1	51704300	51704853	RT4_FOXA1_1662		chr10	25200563	25201158	RT4_GATA3_1_1662
	chr1	51716920	51717136	RT4_FOXA1_1663		chr10	27153175	27153674	RT4_GATA3_1_1663
	chr1	51720859	51721154	RT4_FOXA1_1664		chr10	27586610	27587158	RT4_GATA3_1_1664
	chr1	51786782	51787106	RT4_FOXA1_1665		chr10	28694112	28694639	RT4_GATA3_1_1665
	chr1	51810553	51810880	RT4_FOXA1_1666		chr10	28790935	28791491	RT4_GATA3_1_1666
	chr1	51841398	51841658	RT4_FOXA1_1667		chr10	28952191	28952825	RT4_GATA3_1_1667
	chr1	51905769	51906138	RT4_FOXA1_1668		chr10	28973979	28974553	RT4_GATA3_1_1668
	chr1	51953750	51954251	RT4_FOXA1_1669		chr10	29062859	29063593	RT4_GATA3_1_1669
	chr1	51957130	51957631	RT4_FOXA1_1670		chr10	29087032	29087585	RT4_GATA3_1_1670
	chr1	51983624	51984038	RT4_FOXA1_1671		chr10	29280727	29281279	RT4_GATA3_1_1671
	chr1	51984909	51985399	RT4_FOXA1_1672		chr10	29311397	29311955	RT4_GATA3_1_1672
	chr1	52004138	52004532	RT4_FOXA1_1673		chr10	29321065	29321664	RT4_GATA3_1_1673
	chr1	52007429	52007829	RT4_FOXA1_1674		chr10	29337006	29337835	RT4_GATA3_1_1674
	chr1	52021461	52021745	RT4_FOXA1_1675		chr10	29390927	29391523	RT4_GATA3_1_1675
	chr1	52023885	52024681	RT4_FOXA1_1676		chr10	29402063	29402685	RT4_GATA3_1_1676
	chr1	52025007	52025279	RT4_FOXA1_1677		chr10	29430629	29431182	RT4_GATA3_1_1677
	chr1	52029558	52029886	RT4_FOXA1_1678		chr10	29607052	29607630	RT4_GATA3_1_1678
	chr1	52083521	52083784	RT4_FOXA1_1679		chr10	29824235	29824776	RT4_GATA3_1_1679
	chr1	52094938	52095147	RT4_FOXA1_1680		chr10	30100994	30101664	RT4_GATA3_1_1680
	chr1	52101635	52101890	RT4_FOXA1_1681		chr10	30290977	30291578	RT4_GATA3_1_1681
	chr1	52102761	52103224	RT4_FOXA1_1682		chr10	30351414	30352082	RT4_GATA3_1_1682
	chr1	52115216	52115749	RT4_FOXA1_1683		chr10	30459683	30460236	RT4_GATA3_1_1683
	chr1	52116386	52116691	RT4_FOXA1_1684		chr10	30712110	30713075	RT4_GATA3_1_1684
	chr1	52155963	52156187	RT4_FOXA1_1685		chr10	30799412	30799931	RT4_GATA3_1_1685
	chr1	52156313	52157194	RT4_FOXA1_1686		chr10	30811526	30812043	RT4_GATA3_1_1686
	chr1	52158085	52158497	RT4_FOXA1_1687		chr10	30894585	30895137	RT4_GATA3_1_1687
	chr1	52203075	52203449	RT4_FOXA1_1688		chr10	30971226	30971817	RT4_GATA3_1_1688
	chr1	52242304	52242570	RT4_FOXA1_1689		chr10	30976428	30977036	RT4_GATA3_1_1689
	chr1	52414163	52414368	RT4_FOXA1_1690		chr10	30984778	30985197	RT4_GATA3_1_1690
	chr1	52442857	52443249	RT4_FOXA1_1691		chr10	31040637	31041109	RT4_GATA3_1_1691
	chr1	52454636	52455065	RT4_FOXA1_1692		chr10	31274752	31275362	RT4_GATA3_1_1692
	chr1	52455926	52456355	RT4_FOXA1_1693		chr10	31702221	31702834	RT4_GATA3_1_1693
	chr1	52477375	52477871	RT4_FOXA1_1694		chr10	32439588	32440040	RT4_GATA3_1_1694
	chr1	52537500	52537679	RT4_FOXA1_1695		chr10	32486366	32486829	RT4_GATA3_1_1695
	chr1	52546101	52546330	RT4_FOXA1_1696		chr10	32586815	32587349	RT4_GATA3_1_1696
	chr1	52558107	52558356	RT4_FOXA1_1697		chr10	32621106	32621708	RT4_GATA3_1_1697
	chr1	52564243	52564410	RT4_FOXA1_1698		chr10	33218494	33218999	RT4_GATA3_1_1698
	chr1	52565043	52565210	RT4_FOXA1_1699		chr10	33239650	33240151	RT4_GATA3_1_1699
	chr1	52585829	52586127	RT4_FOXA1_1700		chr10	33297664	33298592	RT4_GATA3_1_1700
	chr1	52591093	52591368	RT4_FOXA1_1701		chr10	33298859	33299432	RT4_GATA3_1_1701
	chr1	52591715	52591932	RT4_FOXA1_1702		chr10	33469244	33469828	RT4_GATA3_1_1702
	chr1	52606336	52606697	RT4_FOXA1_1703		chr10	33579372	33579878	RT4_GATA3_1_1703
	chr1	52608201	52608423	RT4_FOXA1_1704		chr10	34462967	34463517	RT4_GATA3_1_1704
	chr1	52611542	52611801	RT4_FOXA1_1705		chr10	34954820	34955419	RT4_GATA3_1_1705
	chr1	52614581	52615061	RT4_FOXA1_1706		chr10	34987814	34988408	RT4_GATA3_1_1706
	chr1	52621833	52622093	RT4_FOXA1_1707		chr10	35037672	35038156	RT4_GATA3_1_1707
	chr1	52643046	52643293	RT4_FOXA1_1708		chr10	35194924	35195561	RT4_GATA3_1_1708
	chr1	52648703	52648987	RT4_FOXA1_1709		chr10	35243184	35243802	RT4_GATA3_1_1709
	chr1	52655770	52656131	RT4_FOXA1_1710		chr10	35262783	35263439	RT4_GATA3_1_1710
	chr1	52657738	52657980	RT4_FOXA1_1711		chr10	35294590	35295241	RT4_GATA3_1_1711
	chr1	52659230	52660107	RT4_FOXA1_1712		chr10	35445975	35446479	RT4_GATA3_1_1712
	chr1	52663611	52663832	RT4_FOXA1_1713		chr10	35595617	35596143	RT4_GATA3_1_1713
	chr1	52707034	52707417	RT4_FOXA1_1714		chr10	37534439	37534899	RT4_GATA3_1_1714
	chr1	52716530	52716876	RT4_FOXA1_1715		chr10	38023809	38024406	RT4_GATA3_1_1715
	chr1	52717914	52718258	RT4_FOXA1_1716		chr10	38562946	38563469	RT4_GATA3_1_1716
	chr1	52723484	52723795	RT4_FOXA1_1717		chr10	38680236	38680789	RT4_GATA3_1_1717
	chr1	52729229	52729620	RT4_FOXA1_1718		chr10	39067927	39068489	RT4_GATA3_1_1718
	chr1	52792276	52792481	RT4_FOXA1_1719		chr10	42647613	42648545	RT4_GATA3_1_1719
	chr1	52831720	52831995	RT4_FOXA1_1720		chr10	42758377	42758927	RT4_GATA3_1_1720
	chr1	52927814	52927982	RT4_FOXA1_1721		chr10	43184754	43185267	RT4_GATA3_1_1721
	chr1	52989160	52989411	RT4_FOXA1_1722		chr10	43346388	43346966	RT4_GATA3_1_1722
	chr1	53017060	53017536	RT4_FOXA1_1723		chr10	43827445	43827990	RT4_GATA3_1_1723
	chr1	53070064	53070395	RT4_FOXA1_1724		chr10	43844144	43845146	RT4_GATA3_1_1724
	chr1	53071941	53072332	RT4_FOXA1_1725		chr10	43851173	43851868	RT4_GATA3_1_1725
	chr1	53140119	53140721	RT4_FOXA1_1726		chr10	43872663	43873200	RT4_GATA3_1_1726
	chr1	53151958	53152241	RT4_FOXA1_1727		chr10	44033798	44034348	RT4_GATA3_1_1727
	chr1	53173094	53173427	RT4_FOXA1_1728		chr10	44552939	44553550	RT4_GATA3_1_1728
	chr1	53191955	53192230	RT4_FOXA1_1729		chr10	44961493	44962090	RT4_GATA3_1_1729
	chr1	53205709	53206072	RT4_FOXA1_1730		chr10	45182471	45183066	RT4_GATA3_1_1730
	chr1	53208554	53208817	RT4_FOXA1_1731		chr10	45220100	45220747	RT4_GATA3_1_1731
	chr1	53213194	53213500	RT4_FOXA1_1732		chr10	45356643	45357304	RT4_GATA3_1_1732
	chr1	53218678	53219324	RT4_FOXA1_1733		chr10	45871685	45872490	RT4_GATA3_1_1733
	chr1	53231799	53232218	RT4_FOXA1_1734		chr10	45960147	45960657	RT4_GATA3_1_1734
	chr1	53280127	53280680	RT4_FOXA1_1735		chr10	45965869	45966511	RT4_GATA3_1_1735
	chr1	53307910	53308289	RT4_FOXA1_1736		chr10	46168340	46168855	RT4_GATA3_1_1736
	chr1	53309080	53309456	RT4_FOXA1_1737		chr10	46951461	46952040	RT4_GATA3_1_1737
	chr1	53326027	53326437	RT4_FOXA1_1738		chr10	46990554	46991145	RT4_GATA3_1_1738
	chr1	53334238	53334482	RT4_FOXA1_1739		chr10	47337724	47338219	RT4_GATA3_1_1739
	chr1	53334679	53334970	RT4_FOXA1_1740		chr10	47551123	47551922	RT4_GATA3_1_1740
	chr1	53345913	53346162	RT4_FOXA1_1741		chr10	47574903	47575457	RT4_GATA3_1_1741
	chr1	53375995	53376164	RT4_FOXA1_1742		chr10	48326069	48326638	RT4_GATA3_1_1742
	chr1	53387505	53387994	RT4_FOXA1_1743		chr10	48331941	48332543	RT4_GATA3_1_1743
	chr1	53423884	53424107	RT4_FOXA1_1744		chr10	48342031	48342569	RT4_GATA3_1_1744
	chr1	53426337	53426504	RT4_FOXA1_1745		chr10	48346470	48346930	RT4_GATA3_1_1745
	chr1	53480411	53480710	RT4_FOXA1_1746		chr10	49462110	49462741	RT4_GATA3_1_1746
	chr1	53501620	53501806	RT4_FOXA1_1747		chr10	49495926	49496537	RT4_GATA3_1_1747
	chr1	53503514	53503747	RT4_FOXA1_1748		chr10	49699176	49699738	RT4_GATA3_1_1748
	chr1	53572633	53573005	RT4_FOXA1_1749		chr10	49996448	49996992	RT4_GATA3_1_1749
	chr1	53573299	53573624	RT4_FOXA1_1750		chr10	50060681	50061251	RT4_GATA3_1_1750
	chr1	53581487	53581784	RT4_FOXA1_1751		chr10	50627021	50627542	RT4_GATA3_1_1751
	chr1	53605635	53605837	RT4_FOXA1_1752		chr10	50707252	50707885	RT4_GATA3_1_1752
	chr1	53611528	53611919	RT4_FOXA1_1753		chr10	50747434	50747922	RT4_GATA3_1_1753
	chr1	53613388	53613780	RT4_FOXA1_1754		chr10	51046852	51047345	RT4_GATA3_1_1754
	chr1	53639211	53639517	RT4_FOXA1_1755		chr10	51513618	51514184	RT4_GATA3_1_1755
	chr1	53649065	53649421	RT4_FOXA1_1756		chr10	51566215	51566773	RT4_GATA3_1_1756
	chr1	53704078	53704444	RT4_FOXA1_1757		chr10	52081794	52082285	RT4_GATA3_1_1757
	chr1	53705522	53705947	RT4_FOXA1_1758		chr10	52121164	52121731	RT4_GATA3_1_1758
	chr1	53793687	53793915	RT4_FOXA1_1759		chr10	52231208	52231805	RT4_GATA3_1_1759
	chr1	53847669	53847972	RT4_FOXA1_1760		chr10	52261626	52262151	RT4_GATA3_1_1760
	chr1	53896661	53896903	RT4_FOXA1_1761		chr10	52271420	52272153	RT4_GATA3_1_1761
	chr1	53897647	53897859	RT4_FOXA1_1762		chr10	52344391	52344918	RT4_GATA3_1_1762
	chr1	53953566	53954055	RT4_FOXA1_1763		chr10	52364527	52365010	RT4_GATA3_1_1763
	chr1	53960526	53960846	RT4_FOXA1_1764		chr10	52374176	52374735	RT4_GATA3_1_1764
	chr1	53978036	53978384	RT4_FOXA1_1765		chr10	54085620	54086182	RT4_GATA3_1_1765
	chr1	54004669	54005392	RT4_FOXA1_1766		chr10	54139031	54139519	RT4_GATA3_1_1766
	chr1	54058322	54058571	RT4_FOXA1_1767		chr10	54643634	54644158	RT4_GATA3_1_1767
	chr1	54058971	54059364	RT4_FOXA1_1768		chr10	54787208	54787851	RT4_GATA3_1_1768
	chr1	54163686	54163884	RT4_FOXA1_1769		chr10	55144119	55144600	RT4_GATA3_1_1769
	chr1	54164710	54164923	RT4_FOXA1_1770		chr10	55198720	55199291	RT4_GATA3_1_1770
	chr1	54203537	54203890	RT4_FOXA1_1771		chr10	55355094	55355737	RT4_GATA3_1_1771
	chr1	54256184	54256420	RT4_FOXA1_1772		chr10	55379365	55379999	RT4_GATA3_1_1772
	chr1	54327217	54327520	RT4_FOXA1_1773		chr10	55525008	55525586	RT4_GATA3_1_1773
	chr1	54334749	54335110	RT4_FOXA1_1774		chr10	55603663	55604202	RT4_GATA3_1_1774
	chr1	54364592	54364845	RT4_FOXA1_1775		chr10	55976051	55976469	RT4_GATA3_1_1775
	chr1	54373014	54373475	RT4_FOXA1_1776		chr10	56345214	56345710	RT4_GATA3_1_1776
	chr1	54375582	54375987	RT4_FOXA1_1777		chr10	56508389	56508866	RT4_GATA3_1_1777
	chr1	54384597	54385008	RT4_FOXA1_1778		chr10	58121246	58121889	RT4_GATA3_1_1778
	chr1	54403880	54404159	RT4_FOXA1_1779		chr10	59846069	59847028	RT4_GATA3_1_1779
	chr1	54408064	54408610	RT4_FOXA1_1780		chr10	59905297	59905824	RT4_GATA3_1_1780
	chr1	54411746	54412378	RT4_FOXA1_1781		chr10	60026408	60027021	RT4_GATA3_1_1781
	chr1	54422364	54422836	RT4_FOXA1_1782		chr10	60040091	60040702	RT4_GATA3_1_1782
	chr1	54433903	54434130	RT4_FOXA1_1783		chr10	61081809	61082409	RT4_GATA3_1_1783
	chr1	54481766	54482555	RT4_FOXA1_1784		chr10	61377062	61377571	RT4_GATA3_1_1784
	chr1	54488710	54489100	RT4_FOXA1_1785		chr10	61614273	61614861	RT4_GATA3_1_1785
	chr1	54517615	54518042	RT4_FOXA1_1786		chr10	61724949	61725584	RT4_GATA3_1_1786
	chr1	54547243	54547779	RT4_FOXA1_1787		chr10	61877405	61877931	RT4_GATA3_1_1787
	chr1	54559832	54560416	RT4_FOXA1_1788		chr10	61934956	61935595	RT4_GATA3_1_1788
	chr1	54587562	54587799	RT4_FOXA1_1789		chr10	62157482	62158009	RT4_GATA3_1_1789
	chr1	54590115	54590528	RT4_FOXA1_1790		chr10	62174020	62174887	RT4_GATA3_1_1790
	chr1	54591475	54591806	RT4_FOXA1_1791		chr10	62224346	62224934	RT4_GATA3_1_1791
	chr1	54603205	54603482	RT4_FOXA1_1792		chr10	62287353	62287883	RT4_GATA3_1_1792
	chr1	54705669	54705921	RT4_FOXA1_1793		chr10	62522009	62522454	RT4_GATA3_1_1793
	chr1	54756402	54756768	RT4_FOXA1_1794		chr10	62760475	62761021	RT4_GATA3_1_1794
	chr1	54764357	54764731	RT4_FOXA1_1795		chr10	63043851	63044447	RT4_GATA3_1_1795
	chr1	54798403	54798768	RT4_FOXA1_1796		chr10	63508944	63509517	RT4_GATA3_1_1796
	chr1	54848928	54849370	RT4_FOXA1_1797		chr10	63545730	63546199	RT4_GATA3_1_1797
	chr1	54850989	54851542	RT4_FOXA1_1798		chr10	63658735	63659267	RT4_GATA3_1_1798
	chr1	54871343	54872231	RT4_FOXA1_1799		chr10	63702628	63703275	RT4_GATA3_1_1799
	chr1	54873309	54873660	RT4_FOXA1_1800		chr10	63765453	63766188	RT4_GATA3_1_1800
	chr1	54873812	54874396	RT4_FOXA1_1801		chr10	63806212	63806783	RT4_GATA3_1_1801
	chr1	54903251	54903534	RT4_FOXA1_1802		chr10	63841968	63842783	RT4_GATA3_1_1802
	chr1	54908093	54908329	RT4_FOXA1_1803		chr10	63857857	63858959	RT4_GATA3_1_1803
	chr1	54926221	54926684	RT4_FOXA1_1804		chr10	63868474	63868973	RT4_GATA3_1_1804
	chr1	54953828	54954347	RT4_FOXA1_1805		chr10	64143705	64144320	RT4_GATA3_1_1805
	chr1	55008039	55008511	RT4_FOXA1_1806		chr10	64209487	64209966	RT4_GATA3_1_1806
	chr1	55029636	55030296	RT4_FOXA1_1807		chr10	64273264	64273895	RT4_GATA3_1_1807
	chr1	55162314	55162505	RT4_FOXA1_1808		chr10	64382972	64383628	RT4_GATA3_1_1808
	chr1	55169223	55169438	RT4_FOXA1_1809		chr10	64397099	64397795	RT4_GATA3_1_1809
	chr1	55261504	55262285	RT4_FOXA1_1810		chr10	64566134	64566642	RT4_GATA3_1_1810
	chr1	55266605	55267047	RT4_FOXA1_1811		chr10	64987352	64987906	RT4_GATA3_1_1811
	chr1	55322102	55322415	RT4_FOXA1_1812		chr10	65197915	65198943	RT4_GATA3_1_1812
	chr1	55324042	55324434	RT4_FOXA1_1813		chr10	65275141	65275700	RT4_GATA3_1_1813
	chr1	55325064	55325382	RT4_FOXA1_1814		chr10	65303661	65304238	RT4_GATA3_1_1814
	chr1	55326563	55326851	RT4_FOXA1_1815		chr10	65393798	65394369	RT4_GATA3_1_1815
	chr1	55354109	55354444	RT4_FOXA1_1816		chr10	65471776	65472254	RT4_GATA3_1_1816
	chr1	55374374	55374581	RT4_FOXA1_1817		chr10	65482244	65482785	RT4_GATA3_1_1817
	chr1	55388760	55388967	RT4_FOXA1_1818		chr10	65483041	65483469	RT4_GATA3_1_1818
	chr1	55396867	55397037	RT4_FOXA1_1819		chr10	65588778	65589322	RT4_GATA3_1_1819
	chr1	55402361	55403021	RT4_FOXA1_1820		chr10	65854279	65854826	RT4_GATA3_1_1820
	chr1	55434002	55434254	RT4_FOXA1_1821		chr10	66139379	66139905	RT4_GATA3_1_1821
	chr1	55436601	55436857	RT4_FOXA1_1822		chr10	66868509	66869082	RT4_GATA3_1_1822
	chr1	55437140	55437558	RT4_FOXA1_1823		chr10	66902380	66902851	RT4_GATA3_1_1823
	chr1	55445515	55445776	RT4_FOXA1_1824		chr10	67620894	67621539	RT4_GATA3_1_1824
	chr1	55522432	55522650	RT4_FOXA1_1825		chr10	68776888	68777426	RT4_GATA3_1_1825
	chr1	55614420	55614625	RT4_FOXA1_1826		chr10	68874572	68875119	RT4_GATA3_1_1826
	chr1	55656913	55657525	RT4_FOXA1_1827		chr10	69163511	69164087	RT4_GATA3_1_1827
	chr1	55708704	55708908	RT4_FOXA1_1828		chr10	69286893	69287587	RT4_GATA3_1_1828
	chr1	55710497	55711326	RT4_FOXA1_1829		chr10	69550577	69551083	RT4_GATA3_1_1829
	chr1	55711410	55711843	RT4_FOXA1_1830		chr10	69583143	69583680	RT4_GATA3_1_1830
	chr1	55750510	55750855	RT4_FOXA1_1831		chr10	69853647	69854218	RT4_GATA3_1_1831
	chr1	55751565	55752079	RT4_FOXA1_1832		chr10	70290579	70291473	RT4_GATA3_1_1832
	chr1	55786643	55786968	RT4_FOXA1_1833		chr10	70391434	70392010	RT4_GATA3_1_1833
	chr1	55787621	55788030	RT4_FOXA1_1834		chr10	70576672	70577271	RT4_GATA3_1_1834
	chr1	55803844	55804014	RT4_FOXA1_1835		chr10	71096801	71097403	RT4_GATA3_1_1835
	chr1	55892356	55892578	RT4_FOXA1_1836		chr10	71185455	71186040	RT4_GATA3_1_1836
	chr1	55894701	55895266	RT4_FOXA1_1837		chr10	71206493	71207086	RT4_GATA3_1_1837
	chr1	55913245	55913520	RT4_FOXA1_1838		chr10	71218460	71219016	RT4_GATA3_1_1838
	chr1	55944573	55944862	RT4_FOXA1_1839		chr10	71253501	71254079	RT4_GATA3_1_1839
	chr1	55972760	55973027	RT4_FOXA1_1840		chr10	71421997	71422536	RT4_GATA3_1_1840
	chr1	56059170	56059362	RT4_FOXA1_1841		chr10	71991799	71992451	RT4_GATA3_1_1841
	chr1	56075742	56076228	RT4_FOXA1_1842		chr10	72079086	72079590	RT4_GATA3_1_1842
	chr1	56097448	56097727	RT4_FOXA1_1843		chr10	72576169	72576735	RT4_GATA3_1_1843
	chr1	56100376	56100636	RT4_FOXA1_1844		chr10	72588666	72589233	RT4_GATA3_1_1844
	chr1	56104662	56105121	RT4_FOXA1_1845		chr10	72611720	72612310	RT4_GATA3_1_1845
	chr1	56115249	56115587	RT4_FOXA1_1846		chr10	72633729	72634232	RT4_GATA3_1_1846
	chr1	56343110	56343378	RT4_FOXA1_1847		chr10	72650726	72651320	RT4_GATA3_1_1847
	chr1	56352765	56353331	RT4_FOXA1_1848		chr10	72744732	72745277	RT4_GATA3_1_1848
	chr1	56382298	56382604	RT4_FOXA1_1849		chr10	72834106	72834631	RT4_GATA3_1_1849
	chr1	56391459	56391660	RT4_FOXA1_1850		chr10	73083918	73084471	RT4_GATA3_1_1850
	chr1	56416159	56416399	RT4_FOXA1_1851		chr10	73272569	73273056	RT4_GATA3_1_1851
	chr1	56431546	56432031	RT4_FOXA1_1852		chr10	73529056	73529833	RT4_GATA3_1_1852
	chr1	56446237	56446508	RT4_FOXA1_1853		chr10	73600339	73601098	RT4_GATA3_1_1853
	chr1	56477610	56478093	RT4_FOXA1_1854		chr10	73609662	73610237	RT4_GATA3_1_1854
	chr1	56491762	56492183	RT4_FOXA1_1855		chr10	73610784	73611339	RT4_GATA3_1_1855
	chr1	56555149	56555887	RT4_FOXA1_1856		chr10	73727667	73728275	RT4_GATA3_1_1856
	chr1	56574294	56574559	RT4_FOXA1_1857		chr10	73930733	73931407	RT4_GATA3_1_1857
	chr1	56704410	56704873	RT4_FOXA1_1858		chr10	74004684	74005353	RT4_GATA3_1_1858
	chr1	56768547	56768780	RT4_FOXA1_1859		chr10	74050698	74051329	RT4_GATA3_1_1859
	chr1	56770601	56770873	RT4_FOXA1_1860		chr10	74113156	74113655	RT4_GATA3_1_1860
	chr1	56798403	56798633	RT4_FOXA1_1861		chr10	74486861	74487419	RT4_GATA3_1_1861
	chr1	56801910	56802176	RT4_FOXA1_1862		chr10	74804188	74804691	RT4_GATA3_1_1862
	chr1	56805476	56805694	RT4_FOXA1_1863		chr10	74817939	74818459	RT4_GATA3_1_1863
	chr1	56838240	56838502	RT4_FOXA1_1864		chr10	74870954	74871547	RT4_GATA3_1_1864
	chr1	56844221	56844460	RT4_FOXA1_1865		chr10	74878702	74879405	RT4_GATA3_1_1865
	chr1	56853139	56853567	RT4_FOXA1_1866		chr10	75021845	75022417	RT4_GATA3_1_1866
	chr1	56880030	56880824	RT4_FOXA1_1867		chr10	75346246	75346816	RT4_GATA3_1_1867
	chr1	56883116	56883559	RT4_FOXA1_1868		chr10	75645904	75646429	RT4_GATA3_1_1868
	chr1	56898368	56898621	RT4_FOXA1_1869		chr10	75668520	75669051	RT4_GATA3_1_1869
	chr1	56906216	56906460	RT4_FOXA1_1870		chr10	75843075	75843602	RT4_GATA3_1_1870
	chr1	56916703	56916955	RT4_FOXA1_1871		chr10	75991043	75991547	RT4_GATA3_1_1871
	chr1	56939349	56939608	RT4_FOXA1_1872		chr10	75997654	75998232	RT4_GATA3_1_1872
	chr1	56941834	56942271	RT4_FOXA1_1873		chr10	76192881	76193465	RT4_GATA3_1_1873
	chr1	56998057	56998542	RT4_FOXA1_1874		chr10	76581312	76581862	RT4_GATA3_1_1874
	chr1	57020970	57021207	RT4_FOXA1_1875		chr10	76623323	76623818	RT4_GATA3_1_1875
	chr1	57027643	57027814	RT4_FOXA1_1876		chr10	76903821	76904328	RT4_GATA3_1_1876
	chr1	57035221	57035741	RT4_FOXA1_1877		chr10	76992720	76993240	RT4_GATA3_1_1877
	chr1	57042605	57043050	RT4_FOXA1_1878		chr10	77185002	77185536	RT4_GATA3_1_1878
	chr1	57043693	57044322	RT4_FOXA1_1879		chr10	77871850	77872456	RT4_GATA3_1_1879
	chr1	57044903	57045644	RT4_FOXA1_1880		chr10	78112054	78112715	RT4_GATA3_1_1880
	chr1	57091586	57091758	RT4_FOXA1_1881		chr10	78193082	78193648	RT4_GATA3_1_1881
	chr1	57093235	57093535	RT4_FOXA1_1882		chr10	78947306	78947874	RT4_GATA3_1_1882
	chr1	57097641	57097971	RT4_FOXA1_1883		chr10	78954755	78955328	RT4_GATA3_1_1883
	chr1	57130433	57130655	RT4_FOXA1_1884		chr10	79269899	79270580	RT4_GATA3_1_1884
	chr1	57154200	57154544	RT4_FOXA1_1885		chr10	79615358	79615951	RT4_GATA3_1_1885
	chr1	57162432	57162985	RT4_FOXA1_1886		chr10	79658055	79658629	RT4_GATA3_1_1886
	chr1	57188730	57188968	RT4_FOXA1_1887		chr10	79730923	79731374	RT4_GATA3_1_1887
	chr1	57220812	57221114	RT4_FOXA1_1888		chr10	80015907	80016456	RT4_GATA3_1_1888
	chr1	57242183	57242597	RT4_FOXA1_1889		chr10	80061415	80061988	RT4_GATA3_1_1889
	chr1	57253890	57254248	RT4_FOXA1_1890		chr10	80692545	80693138	RT4_GATA3_1_1890
	chr1	57277137	57277319	RT4_FOXA1_1891		chr10	80724282	80725125	RT4_GATA3_1_1891
	chr1	57284003	57284261	RT4_FOXA1_1892		chr10	80780064	80780639	RT4_GATA3_1_1892
	chr1	57284596	57285000	RT4_FOXA1_1893		chr10	80908440	80908980	RT4_GATA3_1_1893
	chr1	57287057	57287318	RT4_FOXA1_1894		chr10	80954759	80955336	RT4_GATA3_1_1894
	chr1	57298288	57298650	RT4_FOXA1_1895		chr10	80999777	81000285	RT4_GATA3_1_1895
	chr1	57584707	57584975	RT4_FOXA1_1896		chr10	81243469	81244043	RT4_GATA3_1_1896
	chr1	57678237	57678479	RT4_FOXA1_1897		chr10	81959964	81960531	RT4_GATA3_1_1897
	chr1	57821412	57821588	RT4_FOXA1_1898		chr10	82137834	82138420	RT4_GATA3_1_1898
	chr1	57862288	57862651	RT4_FOXA1_1899		chr10	82202586	82203170	RT4_GATA3_1_1899
	chr1	57863522	57863798	RT4_FOXA1_1900		chr10	82254688	82255243	RT4_GATA3_1_1900
	chr1	57875415	57875874	RT4_FOXA1_1901		chr10	82265853	82266706	RT4_GATA3_1_1901
	chr1	57880640	57881075	RT4_FOXA1_1902		chr10	83950294	83950865	RT4_GATA3_1_1902
	chr1	57930362	57930641	RT4_FOXA1_1903		chr10	84655556	84656094	RT4_GATA3_1_1903
	chr1	57994195	57994417	RT4_FOXA1_1904		chr10	84690192	84690764	RT4_GATA3_1_1904
	chr1	58011602	58011846	RT4_FOXA1_1905		chr10	84836114	84836686	RT4_GATA3_1_1905
	chr1	58020524	58020777	RT4_FOXA1_1906		chr10	85437797	85438343	RT4_GATA3_1_1906
	chr1	58020935	58021289	RT4_FOXA1_1907		chr10	85955726	85956323	RT4_GATA3_1_1907
	chr1	58042457	58042754	RT4_FOXA1_1908		chr10	86068602	86069110	RT4_GATA3_1_1908
	chr1	58056065	58056741	RT4_FOXA1_1909		chr10	86096890	86097490	RT4_GATA3_1_1909
	chr1	58076719	58076917	RT4_FOXA1_1910		chr10	86114387	86114947	RT4_GATA3_1_1910
	chr1	58256346	58256684	RT4_FOXA1_1911		chr10	86530316	86530756	RT4_GATA3_1_1911
	chr1	58297412	58297784	RT4_FOXA1_1912		chr10	87362907	87363456	RT4_GATA3_1_1912
	chr1	58323541	58323833	RT4_FOXA1_1913		chr10	87401181	87401928	RT4_GATA3_1_1913
	chr1	58339645	58339859	RT4_FOXA1_1914		chr10	88710431	88711286	RT4_GATA3_1_1914
	chr1	58364402	58364690	RT4_FOXA1_1915		chr10	88752519	88753008	RT4_GATA3_1_1915
	chr1	58557543	58557769	RT4_FOXA1_1916		chr10	88785203	88785790	RT4_GATA3_1_1916
	chr1	58648950	58649227	RT4_FOXA1_1917		chr10	88963463	88964004	RT4_GATA3_1_1917
	chr1	58731616	58731920	RT4_FOXA1_1918		chr10	89008618	89009108	RT4_GATA3_1_1918
	chr1	58741680	58741925	RT4_FOXA1_1919		chr10	89176597	89177167	RT4_GATA3_1_1919
	chr1	58823966	58824463	RT4_FOXA1_1920		chr10	89248390	89248883	RT4_GATA3_1_1920
	chr1	58852554	58852843	RT4_FOXA1_1921		chr10	89395189	89395676	RT4_GATA3_1_1921
	chr1	58907601	58907954	RT4_FOXA1_1922		chr10	89465021	89465613	RT4_GATA3_1_1922
	chr1	58912066	58912306	RT4_FOXA1_1923		chr10	89781179	89781761	RT4_GATA3_1_1923
	chr1	58917191	58917702	RT4_FOXA1_1924		chr10	89801728	89802336	RT4_GATA3_1_1924
	chr1	59012386	59012612	RT4_FOXA1_1925		chr10	89851467	89852059	RT4_GATA3_1_1925
	chr1	59038438	59038853	RT4_FOXA1_1926		chr10	89912365	89912972	RT4_GATA3_1_1926
	chr1	59042329	59042729	RT4_FOXA1_1927		chr10	89953927	89954521	RT4_GATA3_1_1927
	chr1	59043616	59043868	RT4_FOXA1_1928		chr10	90106260	90106890	RT4_GATA3_1_1928
	chr1	59044498	59044858	RT4_FOXA1_1929		chr10	90288025	90288536	RT4_GATA3_1_1929
	chr1	59074481	59074804	RT4_FOXA1_1930		chr10	90751305	90752045	RT4_GATA3_1_1930
	chr1	59085917	59086372	RT4_FOXA1_1931		chr10	91019929	91020546	RT4_GATA3_1_1931
	chr1	59086477	59086926	RT4_FOXA1_1932		chr10	91093328	91093913	RT4_GATA3_1_1932
	chr1	59094644	59094930	RT4_FOXA1_1933		chr10	91258392	91258866	RT4_GATA3_1_1933
	chr1	59111654	59112266	RT4_FOXA1_1934		chr10	91401840	91402420	RT4_GATA3_1_1934
	chr1	59117414	59117596	RT4_FOXA1_1935		chr10	91681105	91681645	RT4_GATA3_1_1935
	chr1	59165693	59166171	RT4_FOXA1_1936		chr10	91986899	91987436	RT4_GATA3_1_1936
	chr1	59176792	59177198	RT4_FOXA1_1937		chr10	92607080	92607695	RT4_GATA3_1_1937
	chr1	59245436	59245703	RT4_FOXA1_1938		chr10	92765960	92766541	RT4_GATA3_1_1938
	chr1	59247053	59247251	RT4_FOXA1_1939		chr10	93111407	93111875	RT4_GATA3_1_1939
	chr1	59247658	59247951	RT4_FOXA1_1940		chr10	93315239	93315692	RT4_GATA3_1_1940
	chr1	59250021	59251050	RT4_FOXA1_1941		chr10	93316331	93316936	RT4_GATA3_1_1941
	chr1	59269591	59269890	RT4_FOXA1_1942		chr10	93431924	93432447	RT4_GATA3_1_1942
	chr1	59270813	59271013	RT4_FOXA1_1943		chr10	93450113	93450676	RT4_GATA3_1_1943
	chr1	59280749	59281361	RT4_FOXA1_1944		chr10	93650567	93651107	RT4_GATA3_1_1944
	chr1	59350732	59351351	RT4_FOXA1_1945		chr10	93715270	93715755	RT4_GATA3_1_1945
	chr1	59441503	59441949	RT4_FOXA1_1946		chr10	93998438	93999033	RT4_GATA3_1_1946
	chr1	59496048	59496434	RT4_FOXA1_1947		chr10	94343500	94344483	RT4_GATA3_1_1947
	chr1	59536316	59536622	RT4_FOXA1_1948		chr10	95197619	95198062	RT4_GATA3_1_1948
	chr1	59578812	59579245	RT4_FOXA1_1949		chr10	95200167	95200890	RT4_GATA3_1_1949
	chr1	59581465	59581922	RT4_FOXA1_1950		chr10	95225799	95226376	RT4_GATA3_1_1950
	chr1	59596418	59596748	RT4_FOXA1_1951		chr10	95235589	95236171	RT4_GATA3_1_1951
	chr1	59635054	59635309	RT4_FOXA1_1952		chr10	95332860	95333733	RT4_GATA3_1_1952
	chr1	59669637	59669922	RT4_FOXA1_1953		chr10	95522726	95523290	RT4_GATA3_1_1953
	chr1	59670025	59670194	RT4_FOXA1_1954		chr10	95633001	95633572	RT4_GATA3_1_1954
	chr1	59672273	59672619	RT4_FOXA1_1955		chr10	95662654	95663198	RT4_GATA3_1_1955
	chr1	59680459	59680796	RT4_FOXA1_1956		chr10	95820758	95821507	RT4_GATA3_1_1956
	chr1	59796144	59796367	RT4_FOXA1_1957		chr10	96157291	96157935	RT4_GATA3_1_1957
	chr1	59834867	59835234	RT4_FOXA1_1958		chr10	96163415	96164017	RT4_GATA3_1_1958
	chr1	59844730	59844971	RT4_FOXA1_1959		chr10	96308982	96309509	RT4_GATA3_1_1959
	chr1	59892182	59892731	RT4_FOXA1_1960		chr10	96377105	96377794	RT4_GATA3_1_1960
	chr1	59916685	59917111	RT4_FOXA1_1961		chr10	96437360	96437942	RT4_GATA3_1_1961
	chr1	59948191	59948446	RT4_FOXA1_1962		chr10	96953533	96954129	RT4_GATA3_1_1962
	chr1	59962237	59962585	RT4_FOXA1_1963		chr10	96989176	96989843	RT4_GATA3_1_1963
	chr1	59964856	59965058	RT4_FOXA1_1964		chr10	97026293	97026836	RT4_GATA3_1_1964
	chr1	59965351	59966086	RT4_FOXA1_1965		chr10	97244627	97245496	RT4_GATA3_1_1965
	chr1	60061628	60061820	RT4_FOXA1_1966		chr10	97601574	97602434	RT4_GATA3_1_1966
	chr1	60097340	60097952	RT4_FOXA1_1967		chr10	98049189	98049751	RT4_GATA3_1_1967
	chr1	60118836	60119129	RT4_FOXA1_1968		chr10	98265066	98265611	RT4_GATA3_1_1968
	chr1	60132771	60133086	RT4_FOXA1_1969		chr10	98293219	98293777	RT4_GATA3_1_1969
	chr1	60139286	60139858	RT4_FOXA1_1970		chr10	98525402	98526111	RT4_GATA3_1_1970
	chr1	60174625	60174836	RT4_FOXA1_1971		chr10	98562731	98563430	RT4_GATA3_1_1971
	chr1	60203717	60204334	RT4_FOXA1_1972		chr10	98670257	98670720	RT4_GATA3_1_1972
	chr1	60209253	60209593	RT4_FOXA1_1973		chr10	99172331	99172911	RT4_GATA3_1_1973
	chr1	60216119	60216651	RT4_FOXA1_1974		chr10	99186973	99187535	RT4_GATA3_1_1974
	chr1	60280005	60280344	RT4_FOXA1_1975		chr10	99204891	99205460	RT4_GATA3_1_1975
	chr1	60296417	60296641	RT4_FOXA1_1976		chr10	99334530	99335122	RT4_GATA3_1_1976
	chr1	60322405	60322574	RT4_FOXA1_1977		chr10	99445128	99445953	RT4_GATA3_1_1977
	chr1	60345187	60345546	RT4_FOXA1_1978		chr10	99790643	99791406	RT4_GATA3_1_1978
	chr1	60358377	60358832	RT4_FOXA1_1979		chr10	99930072	99930596	RT4_GATA3_1_1979
	chr1	60381693	60382085	RT4_FOXA1_1980		chr10	100230505	100231089	RT4_GATA3_1_1980
	chr1	60443626	60443987	RT4_FOXA1_1981		chr10	101178577	101179136	RT4_GATA3_1_1981
	chr1	60510560	60510778	RT4_FOXA1_1982		chr10	101414470	101415127	RT4_GATA3_1_1982
	chr1	60513764	60514221	RT4_FOXA1_1983		chr10	101449154	101449720	RT4_GATA3_1_1983
	chr1	60520982	60521611	RT4_FOXA1_1984		chr10	101535605	101536173	RT4_GATA3_1_1984
	chr1	60544120	60544536	RT4_FOXA1_1985		chr10	101539679	101540613	RT4_GATA3_1_1985
	chr1	60554449	60554841	RT4_FOXA1_1986		chr10	101725891	101726677	RT4_GATA3_1_1986
	chr1	60736784	60737190	RT4_FOXA1_1987		chr10	101803059	101804002	RT4_GATA3_1_1987
	chr1	60745574	60745798	RT4_FOXA1_1988		chr10	102130162	102130733	RT4_GATA3_1_1988
	chr1	60766916	60767082	RT4_FOXA1_1989		chr10	102172704	102173303	RT4_GATA3_1_1989
	chr1	60777445	60777695	RT4_FOXA1_1990		chr10	102180215	102180727	RT4_GATA3_1_1990
	chr1	60786834	60787180	RT4_FOXA1_1991		chr10	102792577	102793191	RT4_GATA3_1_1991
	chr1	60884257	60884471	RT4_FOXA1_1992		chr10	102855289	102855834	RT4_GATA3_1_1992
	chr1	60970211	60970520	RT4_FOXA1_1993		chr10	103055288	103055870	RT4_GATA3_1_1993
	chr1	60992131	60992365	RT4_FOXA1_1994		chr10	103134460	103134960	RT4_GATA3_1_1994
[truncated: 78,025 more rows]
