# Supplementary material for: Subtype-associated epigenomic landscape and 3D genome structure in bladder cancer
Source: Genome Biol. 2021 Apr 15;22:105. doi: 10.1186/s13059-021-02325-y (PMC8048365; doi:10.1186/s13059-021-02325-y)
Supplement: Supplementary file 13 — Additional file 13: Table S12. Peakachu Loops called in each bladder cancer cell line. [file 13059_2021_2325_MOESM13_ESM.xlsx]

## Sheet: Table S12-Peakachu Hi-C Loops
Supplementary Table S12: Peakachu Loops called in each bladder cancer cell line
	Sample	#Loops called
	RT4	51836
	SW780	66121
	SCABER	69032	Avg
	HT1376	38271	56315
	T1	38268
	T2	27806
	T3	32958
	T4	21162
	T5	35111
	RT4 Loops							SW780 Loops							SCABER Loops							HT1376 Loops							T1 Loops							T2 Loops							T3 Loops
	Loop Anchor 1			Loop Anchor 2				Loop Anchor 1			Loop Anchor 2				Loop Anchor 1			Loop Anchor 2				Loop Anchor 1			Loop Anchor 2				Loop Anchor 1			Loop Anchor 2				Loop Anchor 1			Loop Anchor 2				Loop Anchor 1			Loop Anchor 2
	chr	start	stop	chr	start	stop		chr	start	stop	chr	start	stop		chr	start	stop	chr	start	stop		chr	start	stop	chr	start	stop		chr	start	stop	chr	start	stop		chr	start	stop	chr	start	stop		chr	start	stop	chr	start	stop
	chr10	35100000	35110000	chr10	35240000	35250000		chr10	7560000	7570000	chr10	7880000	7890000		chr10	23580000	23590000	chr10	23980000	23990000		chr10	94840000	94850000	chr10	95050000	95060000		chr10	70760000	70770000	chr10	71150000	71160000		chr10	6450000	6460000	chr10	6700000	6710000		chr10	49860000	49870000	chr10	50370000	50380000
	chr10	62020000	62030000	chr10	62170000	62180000		chr10	7560000	7570000	chr10	8930000	8940000		chr10	23640000	23650000	chr10	24750000	24760000		chr10	94850000	94860000	chr10	95280000	95290000		chr10	70760000	70770000	chr10	70930000	70940000		chr10	89720000	89730000	chr10	90310000	90320000		chr10	49870000	49880000	chr10	50180000	50190000
	chr10	107710000	107720000	chr10	107930000	107940000		chr10	7570000	7580000	chr10	7720000	7730000		chr10	23600000	23610000	chr10	23810000	23820000		chr10	3710000	3720000	chr10	3810000	3820000		chr10	70760000	70770000	chr10	70850000	70860000		chr10	112570000	112580000	chr10	112660000	112670000		chr10	49870000	49880000	chr10	50590000	50600000
	chr10	107670000	107680000	chr10	108080000	108090000		chr10	7560000	7570000	chr10	8050000	8060000		chr10	23630000	23640000	chr10	23720000	23730000		chr10	3710000	3720000	chr10	4810000	4820000		chr10	95830000	95840000	chr10	96070000	96080000		chr10	112500000	112510000	chr10	112640000	112650000		chr10	49860000	49870000	chr10	50720000	50730000
	chr10	118580000	118590000	chr10	119060000	119070000		chr10	7580000	7590000	chr10	7940000	7950000		chr10	49870000	49880000	chr10	50600000	50610000		chr10	101380000	101390000	chr10	101460000	101470000		chr10	107550000	107560000	chr10	107940000	107950000		chr10	6130000	6140000	chr10	6320000	6330000		chr10	134650000	134660000	chr10	134930000	134940000
	chr10	118550000	118560000	chr10	118930000	118940000		chr10	7560000	7570000	chr10	9340000	9350000		chr10	49860000	49870000	chr10	50720000	50730000		chr10	90990000	91000000	chr10	91460000	91470000		chr10	34820000	34830000	chr10	34900000	34910000		chr10	6140000	6150000	chr10	6240000	6250000		chr10	134610000	134620000	chr10	134900000	134910000
	chr10	118570000	118580000	chr10	118770000	118780000		chr10	7570000	7580000	chr10	9230000	9240000		chr10	49870000	49880000	chr10	50180000	50190000		chr10	91020000	91030000	chr10	91320000	91330000		chr10	101390000	101400000	chr10	101470000	101480000		chr10	6180000	6190000	chr10	6440000	6450000		chr10	14550000	14560000	chr10	15150000	15160000
	chr10	560000	570000	chr10	640000	650000		chr10	90780000	90790000	chr10	90970000	90980000		chr10	31640000	31650000	chr10	32090000	32100000		chr10	91020000	91030000	chr10	91120000	91130000		chr10	100340000	100350000	chr10	101020000	101030000		chr10	29190000	29200000	chr10	29270000	29280000		chr10	14540000	14550000	chr10	14860000	14870000
	chr10	560000	570000	chr10	730000	740000		chr10	90780000	90790000	chr10	91160000	91170000		chr10	17100000	17110000	chr10	17250000	17260000		chr10	54070000	54080000	chr10	54240000	54250000		chr10	54070000	54080000	chr10	54320000	54330000		chr10	29180000	29190000	chr10	29420000	29430000		chr10	14530000	14540000	chr10	14940000	14950000
	chr10	550000	560000	chr10	840000	850000		chr10	90690000	90700000	chr10	90780000	90790000		chr10	73240000	73250000	chr10	73460000	73470000		chr10	54050000	54060000	chr10	54480000	54490000		chr10	54070000	54080000	chr10	54240000	54250000		chr10	97770000	97780000	chr10	98040000	98050000		chr10	14540000	14550000	chr10	15000000	15010000
	chr10	64190000	64200000	chr10	64580000	64590000		chr10	113920000	113930000	chr10	114190000	114200000		chr10	73330000	73340000	chr10	73460000	73470000		chr10	54070000	54080000	chr10	54300000	54310000		chr10	54060000	54070000	chr10	54460000	54470000		chr10	32540000	32550000	chr10	32630000	32640000		chr10	3950000	3960000	chr10	4280000	4290000
	chr10	64250000	64260000	chr10	64910000	64920000		chr10	113940000	113950000	chr10	114060000	114070000		chr10	73410000	73420000	chr10	73560000	73570000		chr10	45740000	45750000	chr10	46150000	46160000		chr10	93040000	93050000	chr10	93490000	93500000		chr10	126330000	126340000	chr10	126430000	126440000		chr10	3960000	3970000	chr10	4690000	4700000
	chr10	64240000	64250000	chr10	64870000	64880000		chr10	32670000	32680000	chr10	33440000	33450000		chr10	73240000	73250000	chr10	73320000	73330000		chr10	45740000	45750000	chr10	45950000	45960000		chr10	93050000	93060000	chr10	93380000	93390000		chr10	120950000	120960000	chr10	121170000	121180000		chr10	4000000	4010000	chr10	4110000	4120000
	chr10	77900000	77910000	chr10	78060000	78070000		chr10	32680000	32690000	chr10	33060000	33070000		chr10	49420000	49430000	chr10	49710000	49720000		chr10	97450000	97460000	chr10	97590000	97600000		chr10	116310000	116320000	chr10	116620000	116630000		chr10	120970000	120980000	chr10	121060000	121070000		chr10	3920000	3930000	chr10	4100000	4110000
	chr10	124260000	124270000	chr10	124450000	124460000		chr10	32680000	32690000	chr10	32950000	32960000		chr10	6950000	6960000	chr10	7450000	7460000		chr10	80730000	80740000	chr10	80950000	80960000		chr10	116310000	116320000	chr10	116540000	116550000		chr10	73800000	73810000	chr10	73970000	73980000		chr10	3970000	3980000	chr10	4380000	4390000
	chr10	9140000	9150000	chr10	9230000	9240000		chr10	99220000	99230000	chr10	99490000	99500000		chr10	6970000	6980000	chr10	7230000	7240000		chr10	80730000	80740000	chr10	80820000	80830000		chr10	116310000	116320000	chr10	116880000	116890000		chr10	73810000	73820000	chr10	74070000	74080000		chr10	3980000	3990000	chr10	4800000	4810000
	chr10	9140000	9150000	chr10	9340000	9350000		chr10	99220000	99230000	chr10	99370000	99380000		chr10	126740000	126750000	chr10	127300000	127310000		chr10	3420000	3430000	chr10	3800000	3810000		chr10	116310000	116320000	chr10	116460000	116470000		chr10	35100000	35110000	chr10	35240000	35250000		chr10	3990000	4000000	chr10	4170000	4180000
	chr10	93310000	93320000	chr10	93390000	93400000		chr10	99160000	99170000	chr10	99330000	99340000		chr10	126690000	126700000	chr10	127310000	127320000		chr10	52760000	52770000	chr10	53180000	53190000		chr10	29090000	29100000	chr10	29390000	29400000		chr10	43850000	43860000	chr10	43930000	43940000		chr10	54400000	54410000	chr10	54480000	54490000
	chr10	93310000	93320000	chr10	93450000	93460000		chr10	33080000	33090000	chr10	33290000	33300000		chr10	126730000	126740000	chr10	127060000	127070000		chr10	11560000	11570000	chr10	11640000	11650000		chr10	31000000	31010000	chr10	32090000	32100000		chr10	17070000	17080000	chr10	17240000	17250000		chr10	6150000	6160000	chr10	6240000	6250000
	chr10	93240000	93250000	chr10	93460000	93470000		chr10	33100000	33110000	chr10	33190000	33200000		chr10	126670000	126680000	chr10	127050000	127060000		chr10	11560000	11570000	chr10	12030000	12040000		chr10	31070000	31080000	chr10	31760000	31770000		chr10	370000	380000	chr10	830000	840000		chr10	6150000	6160000	chr10	6440000	6450000
	chr10	93230000	93240000	chr10	93670000	93680000		chr10	33080000	33090000	chr10	33600000	33610000		chr10	126680000	126690000	chr10	127420000	127430000		chr10	11550000	11560000	chr10	11760000	11770000		chr10	30980000	30990000	chr10	32290000	32300000		chr10	102970000	102980000	chr10	103330000	103340000		chr10	5990000	6000000	chr10	6140000	6150000
	chr10	45510000	45520000	chr10	45730000	45740000		chr10	33080000	33090000	chr10	33440000	33450000		chr10	126730000	126740000	chr10	126830000	126840000		chr10	45510000	45520000	chr10	45720000	45730000		chr10	31070000	31080000	chr10	31600000	31610000		chr10	102970000	102980000	chr10	103530000	103540000		chr10	5990000	6000000	chr10	6440000	6450000
	chr10	54980000	54990000	chr10	55560000	55570000		chr10	105360000	105370000	chr10	105630000	105640000		chr10	18390000	18400000	chr10	18490000	18500000		chr10	45510000	45520000	chr10	45670000	45680000		chr10	31040000	31050000	chr10	31610000	31620000		chr10	102960000	102970000	chr10	103200000	103210000		chr10	49570000	49580000	chr10	49860000	49870000
	chr10	54980000	54990000	chr10	55150000	55160000		chr10	105350000	105360000	chr10	105440000	105450000		chr10	10650000	10660000	chr10	11050000	11060000		chr10	69460000	69470000	chr10	69540000	69550000		chr10	31070000	31080000	chr10	31310000	31320000		chr10	104830000	104840000	chr10	105100000	105110000		chr10	49570000	49580000	chr10	49710000	49720000
	chr10	104480000	104490000	chr10	104810000	104820000		chr10	1440000	1450000	chr10	1890000	1900000		chr10	119470000	119480000	chr10	119830000	119840000		chr10	5490000	5500000	chr10	5660000	5670000		chr10	31000000	31010000	chr10	32480000	32490000		chr10	104830000	104840000	chr10	105000000	105010000		chr10	45500000	45510000	chr10	45730000	45740000
	chr10	104480000	104490000	chr10	104650000	104660000		chr10	9630000	9640000	chr10	11300000	11310000		chr10	119480000	119490000	chr10	120000000	120010000		chr10	5480000	5490000	chr10	5930000	5940000		chr10	31070000	31080000	chr10	31420000	31430000		chr10	34700000	34710000	chr10	34800000	34810000		chr10	59930000	59940000	chr10	60050000	60060000
	chr10	104500000	104510000	chr10	105010000	105020000		chr10	22030000	22040000	chr10	22230000	22240000		chr10	116310000	116320000	chr10	116450000	116460000		chr10	5480000	5490000	chr10	5790000	5800000		chr10	59930000	59940000	chr10	60050000	60060000		chr10	49880000	49890000	chr10	50020000	50030000		chr10	59930000	59940000	chr10	60150000	60160000
	chr10	104490000	104500000	chr10	105070000	105080000		chr10	73460000	73470000	chr10	73570000	73580000		chr10	116310000	116320000	chr10	116880000	116890000		chr10	5490000	5500000	chr10	5850000	5860000		chr10	105170000	105180000	chr10	105440000	105450000		chr10	49890000	49900000	chr10	50120000	50130000		chr10	12760000	12770000	chr10	13090000	13100000
	chr10	104500000	104510000	chr10	104580000	104590000		chr10	67110000	67120000	chr10	67460000	67470000		chr10	116330000	116340000	chr10	116820000	116830000		chr10	27850000	27860000	chr10	28680000	28690000		chr10	105160000	105170000	chr10	105240000	105250000		chr10	49870000	49880000	chr10	50730000	50740000		chr10	12760000	12770000	chr10	12940000	12950000
	chr10	98140000	98150000	chr10	98720000	98730000		chr10	22850000	22860000	chr10	23000000	23010000		chr10	116310000	116320000	chr10	116540000	116550000		chr10	27850000	27860000	chr10	28460000	28470000		chr10	105180000	105190000	chr10	105330000	105340000		chr10	92760000	92770000	chr10	93010000	93020000		chr10	7150000	7160000	chr10	7300000	7310000
	chr10	98140000	98150000	chr10	98570000	98580000		chr10	22890000	22900000	chr10	23160000	23170000		chr10	5830000	5840000	chr10	5920000	5930000		chr10	27850000	27860000	chr10	27950000	27960000		chr10	7790000	7800000	chr10	9340000	9350000		chr10	21370000	21380000	chr10	21450000	21460000		chr10	7160000	7170000	chr10	7450000	7460000
	chr10	98140000	98150000	chr10	98350000	98360000		chr10	22870000	22880000	chr10	23360000	23370000		chr10	59840000	59850000	chr10	60050000	60060000		chr10	27840000	27850000	chr10	28520000	28530000		chr10	7810000	7820000	chr10	7890000	7900000		chr10	21370000	21380000	chr10	21550000	21560000		chr10	13240000	13250000	chr10	13470000	13480000
	chr10	98130000	98140000	chr10	98820000	98830000		chr10	22860000	22870000	chr10	23270000	23280000		chr10	59830000	59840000	chr10	59910000	59920000		chr10	77140000	77150000	chr10	77360000	77370000		chr10	7820000	7830000	chr10	8080000	8090000		chr10	5050000	5060000	chr10	5430000	5440000		chr10	13200000	13210000	chr10	13340000	13350000
	chr10	98140000	98150000	chr10	98260000	98270000		chr10	90160000	90170000	chr10	90310000	90320000		chr10	127420000	127430000	chr10	127520000	127530000		chr10	44190000	44200000	chr10	44390000	44400000		chr10	89290000	89300000	chr10	89600000	89610000		chr10	5060000	5070000	chr10	5310000	5320000		chr10	125340000	125350000	chr10	125720000	125730000
	chr10	98150000	98160000	chr10	98970000	98980000		chr10	31810000	31820000	chr10	31960000	31970000		chr10	127430000	127440000	chr10	127620000	127630000		chr10	44180000	44190000	chr10	44510000	44520000		chr10	89300000	89310000	chr10	89500000	89510000		chr10	98480000	98490000	chr10	98590000	98600000		chr10	125330000	125340000	chr10	126070000	126080000
	chr10	62890000	62900000	chr10	63480000	63490000		chr10	31800000	31810000	chr10	32090000	32100000		chr10	90320000	90330000	chr10	90570000	90580000		chr10	44170000	44180000	chr10	44880000	44890000		chr10	26150000	26160000	chr10	26840000	26850000		chr10	98500000	98510000	chr10	98800000	98810000		chr10	73450000	73460000	chr10	73530000	73540000
	chr10	62900000	62910000	chr10	63030000	63040000		chr10	66730000	66740000	chr10	67930000	67940000		chr10	90320000	90330000	chr10	90690000	90700000		chr10	44170000	44180000	chr10	45360000	45370000		chr10	26160000	26170000	chr10	26550000	26560000		chr10	126220000	126230000	chr10	126420000	126430000		chr10	73360000	73370000	chr10	73450000	73460000
	chr10	119300000	119310000	chr10	119440000	119450000		chr10	66730000	66740000	chr10	67100000	67110000		chr10	90320000	90330000	chr10	90960000	90970000		chr10	44180000	44190000	chr10	44680000	44690000		chr10	133020000	133030000	chr10	133610000	133620000		chr10	27000000	27010000	chr10	27170000	27180000		chr10	73330000	73340000	chr10	73460000	73470000
	chr10	119260000	119270000	chr10	120180000	120190000		chr10	66730000	66740000	chr10	67040000	67050000		chr10	90320000	90330000	chr10	90740000	90750000		chr10	44160000	44170000	chr10	44810000	44820000		chr10	15940000	15950000	chr10	16820000	16830000		chr10	16880000	16890000	chr10	17290000	17300000		chr10	73470000	73480000	chr10	73650000	73660000
	chr10	119280000	119290000	chr10	119800000	119810000		chr10	66740000	66750000	chr10	67450000	67460000		chr10	90350000	90360000	chr10	90750000	90760000		chr10	94040000	94050000	chr10	94190000	94200000		chr10	15940000	15950000	chr10	16630000	16640000		chr10	16880000	16890000	chr10	17480000	17490000		chr10	75640000	75650000	chr10	75840000	75850000
	chr10	119250000	119260000	chr10	119780000	119790000		chr10	66760000	66770000	chr10	66960000	66970000		chr10	90320000	90330000	chr10	90440000	90450000		chr10	70570000	70580000	chr10	70650000	70660000		chr10	15940000	15950000	chr10	16580000	16590000		chr10	122830000	122840000	chr10	122920000	122930000		chr10	75720000	75730000	chr10	75830000	75840000
	chr10	119290000	119300000	chr10	119610000	119620000		chr10	86130000	86140000	chr10	86290000	86300000		chr10	28530000	28540000	chr10	28670000	28680000		chr10	117460000	117470000	chr10	118040000	118050000		chr10	61590000	61600000	chr10	61780000	61790000		chr10	75710000	75720000	chr10	75810000	75820000		chr10	75590000	75600000	chr10	75850000	75860000
	chr10	119250000	119260000	chr10	120000000	120010000		chr10	86130000	86140000	chr10	86360000	86370000		chr10	36330000	36340000	chr10	37070000	37080000		chr10	95130000	95140000	chr10	95240000	95250000		chr10	45960000	45970000	chr10	46150000	46160000		chr10	14540000	14550000	chr10	15010000	15020000		chr10	75600000	75610000	chr10	75700000	75710000
	chr10	119290000	119300000	chr10	119860000	119870000		chr10	86130000	86140000	chr10	86490000	86500000		chr10	36320000	36330000	chr10	37150000	37160000		chr10	27650000	27660000	chr10	27940000	27950000		chr10	90150000	90160000	chr10	90300000	90310000		chr10	14560000	14570000	chr10	15140000	15150000		chr10	75620000	75630000	chr10	75980000	75990000
	chr10	119290000	119300000	chr10	119660000	119670000		chr10	81700000	81710000	chr10	82000000	82010000		chr10	104590000	104600000	chr10	105090000	105100000		chr10	104000000	104010000	chr10	104330000	104340000		chr10	6040000	6050000	chr10	6690000	6700000		chr10	14620000	14630000	chr10	15140000	15150000		chr10	75690000	75700000	chr10	75980000	75990000
	chr10	28030000	28040000	chr10	28670000	28680000		chr10	81670000	81680000	chr10	81790000	81800000		chr10	104480000	104490000	chr10	105090000	105100000		chr10	103980000	103990000	chr10	104230000	104240000		chr10	6080000	6090000	chr10	6440000	6450000		chr10	14570000	14580000	chr10	14870000	14880000		chr10	44180000	44190000	chr10	44390000	44400000
	chr10	115550000	115560000	chr10	115630000	115640000		chr10	104490000	104500000	chr10	104580000	104590000		chr10	104510000	104520000	chr10	105030000	105040000		chr10	103990000	104000000	chr10	104110000	104120000		chr10	5970000	5980000	chr10	6440000	6450000		chr10	14610000	14620000	chr10	14690000	14700000		chr10	44160000	44170000	chr10	44880000	44890000
	chr10	115710000	115720000	chr10	115800000	115810000		chr10	104480000	104490000	chr10	104830000	104840000		chr10	104440000	104450000	chr10	105110000	105120000		chr10	103930000	103940000	chr10	104090000	104100000		chr10	6020000	6030000	chr10	6120000	6130000		chr10	73870000	73880000	chr10	73970000	73980000		chr10	44190000	44200000	chr10	44550000	44560000
	chr10	115670000	115680000	chr10	115850000	115860000		chr10	90320000	90330000	chr10	90570000	90580000		chr10	104490000	104500000	chr10	104650000	104660000		chr10	90330000	90340000	chr10	90570000	90580000		chr10	70530000	70540000	chr10	70730000	70740000		chr10	73890000	73900000	chr10	74090000	74100000		chr10	44170000	44180000	chr10	44800000	44810000
	chr10	115560000	115570000	chr10	115860000	115870000		chr10	90320000	90330000	chr10	90440000	90450000		chr10	104570000	104580000	chr10	104660000	104670000		chr10	90340000	90350000	chr10	90430000	90440000		chr10	70560000	70570000	chr10	70650000	70660000		chr10	620000	630000	chr10	820000	830000		chr10	44160000	44170000	chr10	45360000	45370000
	chr10	115710000	115720000	chr10	115850000	115860000		chr10	90320000	90330000	chr10	90690000	90700000		chr10	104590000	104600000	chr10	104820000	104830000		chr10	90320000	90330000	chr10	90680000	90690000		chr10	70550000	70560000	chr10	70910000	70920000		chr10	95320000	95330000	chr10	95420000	95430000		chr10	44200000	44210000	chr10	44680000	44690000
	chr10	82860000	82870000	chr10	83100000	83110000		chr10	77650000	77660000	chr10	78060000	78070000		chr10	104450000	104460000	chr10	104770000	104780000		chr10	14990000	15000000	chr10	15140000	15150000		chr10	94330000	94340000	chr10	94630000	94640000		chr10	124800000	124810000	chr10	125310000	125320000		chr10	24650000	24660000	chr10	24790000	24800000
	chr10	103600000	103610000	chr10	103770000	103780000		chr10	77690000	77700000	chr10	77790000	77800000		chr10	104600000	104610000	chr10	105220000	105230000		chr10	52170000	52180000	chr10	52370000	52380000		chr10	117450000	117460000	chr10	118040000	118050000		chr10	6240000	6250000	chr10	6320000	6330000		chr10	21560000	21570000	chr10	22250000	22260000
	chr10	24890000	24900000	chr10	25110000	25120000		chr10	77660000	77670000	chr10	78860000	78870000		chr10	45420000	45430000	chr10	45700000	45710000		chr10	75900000	75910000	chr10	75990000	76000000		chr10	31610000	31620000	chr10	32060000	32070000		chr10	6240000	6250000	chr10	6440000	6450000		chr10	21570000	21580000	chr10	22020000	22030000
	chr10	24920000	24930000	chr10	25230000	25240000		chr10	124790000	124800000	chr10	125720000	125730000		chr10	45430000	45440000	chr10	45630000	45640000		chr10	75910000	75920000	chr10	76860000	76870000		chr10	102190000	102200000	chr10	102270000	102280000		chr10	15940000	15950000	chr10	16850000	16860000		chr10	21560000	21570000	chr10	21780000	21790000
	chr10	24910000	24920000	chr10	25280000	25290000		chr10	124800000	124810000	chr10	125310000	125320000		chr10	34540000	34550000	chr10	34920000	34930000		chr10	127550000	127560000	chr10	127660000	127670000		chr10	102190000	102200000	chr10	102640000	102650000		chr10	15940000	15950000	chr10	16820000	16830000		chr10	123270000	123280000	chr10	123490000	123500000
	chr10	24940000	24950000	chr10	25360000	25370000		chr10	124800000	124810000	chr10	124890000	124900000		chr10	45980000	45990000	chr10	46150000	46160000		chr10	127550000	127560000	chr10	128190000	128200000		chr10	95580000	95590000	chr10	96080000	96090000		chr10	91000000	91010000	chr10	91320000	91330000		chr10	123260000	123270000	chr10	123350000	123360000
	chr10	80740000	80750000	chr10	80950000	80960000		chr10	124800000	124810000	chr10	125140000	125150000		chr10	45960000	45970000	chr10	46100000	46110000		chr10	6240000	6250000	chr10	6440000	6450000		chr10	95570000	95580000	chr10	96210000	96220000		chr10	91030000	91040000	chr10	91130000	91140000		chr10	43780000	43790000	chr10	43950000	43960000
	chr10	80730000	80740000	chr10	80820000	80830000		chr10	95290000	95300000	chr10	95570000	95580000		chr10	21780000	21790000	chr10	22240000	22250000		chr10	59900000	59910000	chr10	60380000	60390000		chr10	90320000	90330000	chr10	90690000	90700000		chr10	72560000	72570000	chr10	72640000	72650000		chr10	43780000	43790000	chr10	43860000	43870000
	chr10	76310000	76320000	chr10	76840000	76850000		chr10	95310000	95320000	chr10	95430000	95440000		chr10	21900000	21910000	chr10	22230000	22240000		chr10	59940000	59950000	chr10	60040000	60050000		chr10	90330000	90340000	chr10	90630000	90640000		chr10	32340000	32350000	chr10	32440000	32450000		chr10	45960000	45970000	chr10	46090000	46100000
	chr10	76300000	76310000	chr10	77000000	77010000		chr10	62410000	62420000	chr10	62530000	62540000		chr10	21780000	21790000	chr10	22520000	22530000		chr10	59930000	59940000	chr10	60140000	60150000		chr10	90320000	90330000	chr10	90570000	90580000		chr10	32320000	32330000	chr10	32480000	32490000		chr10	82120000	82130000	chr10	82350000	82360000
	chr10	76570000	76580000	chr10	76760000	76770000		chr10	6620000	6630000	chr10	6700000	6710000		chr10	21900000	21910000	chr10	22010000	22020000		chr10	30680000	30690000	chr10	30870000	30880000		chr10	90340000	90350000	chr10	90450000	90460000		chr10	116390000	116400000	chr10	116570000	116580000		chr10	82130000	82140000	chr10	82680000	82690000
	chr10	94660000	94670000	chr10	94800000	94810000		chr10	82040000	82050000	chr10	82270000	82280000		chr10	14570000	14580000	chr10	14860000	14870000		chr10	21140000	21150000	chr10	21530000	21540000		chr10	90330000	90340000	chr10	90970000	90980000		chr10	11650000	11660000	chr10	11750000	11760000		chr10	82200000	82210000	chr10	82290000	82300000
	chr10	94640000	94650000	chr10	95050000	95060000		chr10	82030000	82040000	chr10	82390000	82400000		chr10	14570000	14580000	chr10	14800000	14810000		chr10	21130000	21140000	chr10	22260000	22270000		chr10	104260000	104270000	chr10	104340000	104350000		chr10	89980000	89990000	chr10	90140000	90150000		chr10	104490000	104500000	chr10	104580000	104590000
	chr10	94650000	94660000	chr10	95110000	95120000		chr10	82030000	82040000	chr10	82110000	82120000		chr10	14650000	14660000	chr10	14790000	14800000		chr10	21150000	21160000	chr10	21650000	21660000		chr10	116640000	116650000	chr10	116880000	116890000		chr10	4870000	4880000	chr10	5670000	5680000		chr10	104480000	104490000	chr10	105100000	105110000
	chr10	94660000	94670000	chr10	95260000	95270000		chr10	82020000	82030000	chr10	82190000	82200000		chr10	14570000	14580000	chr10	15140000	15150000		chr10	44810000	44820000	chr10	45360000	45370000		chr10	68870000	68880000	chr10	69250000	69260000		chr10	4890000	4900000	chr10	5320000	5330000		chr10	104490000	104500000	chr10	104990000	105000000
	chr10	3250000	3260000	chr10	4380000	4390000		chr10	68950000	68960000	chr10	69110000	69120000		chr10	44160000	44170000	chr10	44880000	44890000		chr10	82450000	82460000	chr10	82700000	82710000		chr10	2860000	2870000	chr10	3090000	3100000		chr10	4890000	4900000	chr10	5060000	5070000		chr10	104490000	104500000	chr10	104830000	104840000
	chr10	3270000	3280000	chr10	3890000	3900000		chr10	30400000	30410000	chr10	30530000	30540000		chr10	44190000	44200000	chr10	44460000	44470000		chr10	82430000	82440000	chr10	82760000	82770000		chr10	126220000	126230000	chr10	126510000	126520000		chr10	4890000	4900000	chr10	5130000	5140000		chr10	52220000	52230000	chr10	52370000	52380000
	chr10	3250000	3260000	chr10	4260000	4270000		chr10	78070000	78080000	chr10	78300000	78310000		chr10	44160000	44170000	chr10	44370000	44380000		chr10	81000000	81010000	chr10	81100000	81110000		chr10	126220000	126230000	chr10	126430000	126440000		chr10	11830000	11840000	chr10	12020000	12030000		chr10	23790000	23800000	chr10	23990000	24000000
	chr10	3240000	3250000	chr10	4690000	4700000		chr10	78060000	78070000	chr10	78740000	78750000		chr10	44160000	44170000	chr10	44520000	44530000		chr10	61660000	61670000	chr10	61790000	61800000		chr10	88160000	88170000	chr10	88640000	88650000		chr10	7560000	7570000	chr10	9340000	9350000		chr10	94640000	94650000	chr10	95080000	95090000
	chr10	3270000	3280000	chr10	3820000	3830000		chr10	78060000	78070000	chr10	78660000	78670000		chr10	44160000	44170000	chr10	45360000	45370000		chr10	27180000	27190000	chr10	27390000	27400000		chr10	88180000	88190000	chr10	88420000	88430000		chr10	7570000	7580000	chr10	7720000	7730000		chr10	127550000	127560000	chr10	128070000	128080000
	chr10	3280000	3290000	chr10	3490000	3500000		chr10	78090000	78100000	chr10	78180000	78190000		chr10	115460000	115470000	chr10	116040000	116050000		chr10	27170000	27180000	chr10	27640000	27650000		chr10	88160000	88170000	chr10	88260000	88270000		chr10	7560000	7570000	chr10	7860000	7870000		chr10	127550000	127560000	chr10	128180000	128190000
	chr10	3260000	3270000	chr10	4100000	4110000		chr10	78060000	78070000	chr10	78860000	78870000		chr10	115460000	115470000	chr10	115550000	115560000		chr10	25250000	25260000	chr10	25370000	25380000		chr10	88160000	88170000	chr10	88330000	88340000		chr10	550000	560000	chr10	830000	840000		chr10	120520000	120530000	chr10	120780000	120790000
	chr10	3290000	3300000	chr10	3390000	3400000		chr10	22460000	22470000	chr10	23280000	23290000		chr10	115450000	115460000	chr10	116210000	116220000		chr10	98520000	98530000	chr10	98770000	98780000		chr10	6240000	6250000	chr10	6440000	6450000		chr10	560000	570000	chr10	660000	670000		chr10	71000000	71010000	chr10	71380000	71390000
	chr10	3290000	3300000	chr10	3700000	3710000		chr10	22460000	22470000	chr10	23220000	23230000		chr10	115460000	115470000	chr10	115860000	115870000		chr10	43870000	43880000	chr10	43950000	43960000		chr10	6140000	6150000	chr10	6290000	6300000		chr10	550000	560000	chr10	720000	730000		chr10	70990000	71000000	chr10	71260000	71270000
	chr10	3270000	3280000	chr10	3660000	3670000		chr10	124490000	124500000	chr10	124670000	124680000		chr10	115470000	115480000	chr10	115680000	115690000		chr10	8240000	8250000	chr10	8400000	8410000		chr10	6150000	6160000	chr10	6240000	6250000		chr10	12310000	12320000	chr10	12450000	12460000		chr10	70990000	71000000	chr10	71150000	71160000
	chr10	3230000	3240000	chr10	4180000	4190000		chr10	124510000	124520000	chr10	124690000	124700000		chr10	106520000	106530000	chr10	106680000	106690000		chr10	8220000	8230000	chr10	8920000	8930000		chr10	38140000	38150000	chr10	38380000	38390000		chr10	12300000	12310000	chr10	12750000	12760000		chr10	71050000	71060000	chr10	71130000	71140000
	chr10	3250000	3260000	chr10	4810000	4820000		chr10	124470000	124480000	chr10	124720000	124730000		chr10	106520000	106530000	chr10	107450000	107460000		chr10	8230000	8240000	chr10	9240000	9250000		chr10	73650000	73660000	chr10	74090000	74100000		chr10	12290000	12300000	chr10	13110000	13120000		chr10	50610000	50620000	chr10	50720000	50730000
	chr10	3230000	3240000	chr10	4510000	4520000		chr10	71180000	71190000	chr10	71460000	71470000		chr10	95310000	95320000	chr10	95570000	95580000		chr10	8230000	8240000	chr10	8670000	8680000		chr10	73720000	73730000	chr10	74100000	74110000		chr10	115620000	115630000	chr10	115700000	115710000		chr10	82450000	82460000	chr10	82680000	82690000
	chr10	30390000	30400000	chr10	30520000	30530000		chr10	71180000	71190000	chr10	71260000	71270000		chr10	95310000	95320000	chr10	95430000	95440000		chr10	124100000	124110000	chr10	124190000	124200000		chr10	73650000	73660000	chr10	73980000	73990000		chr10	115610000	115620000	chr10	115850000	115860000		chr10	6480000	6490000	chr10	7460000	7470000
	chr10	12280000	12290000	chr10	12940000	12950000		chr10	71170000	71180000	chr10	71390000	71400000		chr10	82330000	82340000	chr10	82670000	82680000		chr10	124100000	124110000	chr10	124320000	124330000		chr10	73650000	73660000	chr10	73800000	73810000		chr10	23580000	23590000	chr10	23980000	23990000		chr10	6480000	6490000	chr10	6690000	6700000
	chr10	12290000	12300000	chr10	12690000	12700000		chr10	92360000	92370000	chr10	92620000	92630000		chr10	82310000	82320000	chr10	82600000	82610000		chr10	123060000	123070000	chr10	123230000	123240000		chr10	30700000	30710000	chr10	30820000	30830000		chr10	23600000	23610000	chr10	23810000	23820000		chr10	6530000	6540000	chr10	6620000	6630000
	chr10	12230000	12240000	chr10	13110000	13120000		chr10	92360000	92370000	chr10	92470000	92480000		chr10	82290000	82300000	chr10	82420000	82430000		chr10	123070000	123080000	chr10	123350000	123360000		chr10	16880000	16890000	chr10	17290000	17300000		chr10	63040000	63050000	chr10	63490000	63500000		chr10	6490000	6500000	chr10	6620000	6630000
	chr10	12280000	12290000	chr10	13100000	13110000		chr10	63350000	63360000	chr10	63570000	63580000		chr10	114970000	114980000	chr10	115140000	115150000		chr10	96040000	96050000	chr10	96200000	96210000		chr10	16880000	16890000	chr10	18500000	18510000		chr10	71170000	71180000	chr10	71260000	71270000		chr10	33200000	33210000	chr10	33290000	33300000
	chr10	12310000	12320000	chr10	12390000	12400000		chr10	63360000	63370000	chr10	63650000	63660000		chr10	114970000	114980000	chr10	115320000	115330000		chr10	65320000	65330000	chr10	65470000	65480000		chr10	16870000	16880000	chr10	17470000	17480000		chr10	71190000	71200000	chr10	71390000	71400000		chr10	33200000	33210000	chr10	33450000	33460000
	chr10	12290000	12300000	chr10	12480000	12490000		chr10	63350000	63360000	chr10	63480000	63490000		chr10	13710000	13720000	chr10	14520000	14530000		chr10	65280000	65290000	chr10	65380000	65390000		chr10	32220000	32230000	chr10	32650000	32660000		chr10	78930000	78940000	chr10	79400000	79410000		chr10	117440000	117450000	chr10	118050000	118060000
	chr10	70320000	70330000	chr10	70470000	70480000		chr10	88360000	88370000	chr10	88650000	88660000		chr10	13700000	13710000	chr10	13820000	13830000		chr10	65220000	65230000	chr10	65390000	65400000		chr10	32210000	32220000	chr10	32290000	32300000		chr10	78930000	78940000	chr10	79460000	79470000		chr10	117460000	117470000	chr10	118150000	118160000
	chr10	70250000	70260000	chr10	70470000	70480000		chr10	88350000	88360000	chr10	88430000	88440000		chr10	13690000	13700000	chr10	14230000	14240000		chr10	11830000	11840000	chr10	12160000	12170000		chr10	32230000	32240000	chr10	32490000	32500000		chr10	121440000	121450000	chr10	121610000	121620000		chr10	79250000	79260000	chr10	79400000	79410000
	chr10	70240000	70250000	chr10	70540000	70550000		chr10	87920000	87930000	chr10	88120000	88130000		chr10	13690000	13700000	chr10	14050000	14060000		chr10	11830000	11840000	chr10	12020000	12030000		chr10	8910000	8920000	chr10	9240000	9250000		chr10	22540000	22550000	chr10	22710000	22720000		chr10	15300000	15310000	chr10	15410000	15420000
	chr10	70250000	70260000	chr10	70640000	70650000		chr10	74450000	74460000	chr10	74590000	74600000		chr10	13720000	13730000	chr10	14130000	14140000		chr10	11820000	11830000	chr10	12220000	12230000		chr10	8910000	8920000	chr10	9330000	9340000		chr10	22520000	22530000	chr10	23270000	23280000		chr10	98830000	98840000	chr10	98960000	98970000
	chr10	70200000	70210000	chr10	70650000	70660000		chr10	68720000	68730000	chr10	69040000	69050000		chr10	28300000	28310000	chr10	28440000	28450000		chr10	43780000	43790000	chr10	43950000	43960000		chr10	76020000	76030000	chr10	76580000	76590000		chr10	22530000	22540000	chr10	22610000	22620000		chr10	98810000	98820000	chr10	99110000	99120000
	chr10	70320000	70330000	chr10	70690000	70700000		chr10	68700000	68710000	chr10	69270000	69280000		chr10	36430000	36440000	chr10	37070000	37080000		chr10	115550000	115560000	chr10	115860000	115870000		chr10	76020000	76030000	chr10	76780000	76790000		chr10	22970000	22980000	chr10	23270000	23280000		chr10	24920000	24930000	chr10	25000000	25010000
	chr10	90330000	90340000	chr10	90410000	90420000		chr10	54070000	54080000	chr10	54240000	54250000		chr10	81900000	81910000	chr10	81980000	81990000		chr10	115630000	115640000	chr10	115820000	115830000		chr10	76030000	76040000	chr10	76510000	76520000		chr10	23010000	23020000	chr10	23100000	23110000		chr10	24920000	24930000	chr10	25370000	25380000
	chr10	90350000	90360000	chr10	90560000	90570000		chr10	53990000	54000000	chr10	54250000	54260000		chr10	81830000	81840000	chr10	81970000	81980000		chr10	1040000	1050000	chr10	1130000	1140000		chr10	76000000	76010000	chr10	76990000	77000000		chr10	103990000	104000000	chr10	104230000	104240000		chr10	24930000	24940000	chr10	25110000	25120000
	chr10	90320000	90330000	chr10	90660000	90670000		chr10	54070000	54080000	chr10	54210000	54220000		chr10	81920000	81930000	chr10	82230000	82240000		chr10	29800000	29810000	chr10	30140000	30150000		chr10	76020000	76030000	chr10	76850000	76860000		chr10	103990000	104000000	chr10	104110000	104120000		chr10	24930000	24940000	chr10	25280000	25290000
	chr10	104260000	104270000	chr10	104340000	104350000		chr10	54060000	54070000	chr10	54330000	54340000		chr10	81810000	81820000	chr10	81890000	81900000		chr10	29790000	29800000	chr10	30290000	30300000		chr10	64590000	64600000	chr10	64840000	64850000		chr10	103980000	103990000	chr10	104340000	104350000		chr10	24920000	24930000	chr10	25160000	25170000
	chr10	65280000	65290000	chr10	65370000	65380000		chr10	54120000	54130000	chr10	54350000	54360000		chr10	81870000	81880000	chr10	82090000	82100000		chr10	29800000	29810000	chr10	29890000	29900000		chr10	64580000	64590000	chr10	64880000	64890000		chr10	34820000	34830000	chr10	34920000	34930000		chr10	71400000	71410000	chr10	71480000	71490000
	chr10	65230000	65240000	chr10	65380000	65390000		chr10	54000000	54010000	chr10	54480000	54490000		chr10	72580000	72590000	chr10	73020000	73030000		chr10	29810000	29820000	chr10	30020000	30030000		chr10	64600000	64610000	chr10	65510000	65520000		chr10	88730000	88740000	chr10	88850000	88860000		chr10	71410000	71420000	chr10	71670000	71680000
	chr10	65320000	65330000	chr10	65480000	65490000		chr10	54050000	54060000	chr10	54480000	54490000		chr10	72570000	72580000	chr10	72960000	72970000		chr10	31790000	31800000	chr10	32070000	32080000		chr10	97450000	97460000	chr10	97600000	97610000		chr10	97190000	97200000	chr10	97360000	97370000		chr10	60060000	60070000	chr10	60280000	60290000
	chr10	87760000	87770000	chr10	88110000	88120000		chr10	86370000	86380000	chr10	86500000	86510000		chr10	72560000	72570000	chr10	72640000	72650000		chr10	61840000	61850000	chr10	62400000	62410000		chr10	121520000	121530000	chr10	121600000	121610000		chr10	116060000	116070000	chr10	116460000	116470000		chr10	60060000	60070000	chr10	60140000	60150000
	chr10	87750000	87760000	chr10	87890000	87900000		chr10	86360000	86370000	chr10	86570000	86580000		chr10	109300000	109310000	chr10	109440000	109450000		chr10	61850000	61860000	chr10	62180000	62190000		chr10	8390000	8400000	chr10	8730000	8740000		chr10	89410000	89420000	chr10	89490000	89500000		chr10	19700000	19710000	chr10	20080000	20090000
	chr10	125000000	125010000	chr10	125300000	125310000		chr10	86330000	86340000	chr10	86570000	86580000		chr10	109300000	109310000	chr10	109560000	109570000		chr10	61860000	61870000	chr10	61960000	61970000		chr10	8420000	8430000	chr10	8910000	8920000		chr10	103650000	103660000	chr10	103760000	103770000		chr10	17060000	17070000	chr10	17240000	17250000
	chr10	73990000	74000000	chr10	74090000	74100000		chr10	55360000	55370000	chr10	55600000	55610000		chr10	68640000	68650000	chr10	69280000	69290000		chr10	81750000	81760000	chr10	81990000	82000000		chr10	8380000	8390000	chr10	8900000	8910000		chr10	103920000	103930000	chr10	104250000	104260000		chr10	62900000	62910000	chr10	63040000	63050000
	chr10	49870000	49880000	chr10	50030000	50040000		chr10	13820000	13830000	chr10	14510000	14520000		chr10	124790000	124800000	chr10	125020000	125030000		chr10	81680000	81690000	chr10	82010000	82020000		chr10	8350000	8360000	chr10	8890000	8900000		chr10	103910000	103920000	chr10	103990000	104000000		chr10	62900000	62910000	chr10	63480000	63490000
	chr10	49880000	49890000	chr10	50600000	50610000		chr10	13840000	13850000	chr10	14260000	14270000		chr10	124800000	124810000	chr10	125140000	125150000		chr10	81710000	81720000	chr10	81800000	81810000		chr10	134270000	134280000	chr10	134350000	134360000		chr10	103890000	103900000	chr10	104180000	104190000		chr10	79150000	79160000	chr10	79400000	79410000
	chr10	49860000	49870000	chr10	50710000	50720000		chr10	13830000	13840000	chr10	14330000	14340000		chr10	124800000	124810000	chr10	125310000	125320000		chr10	81710000	81720000	chr10	81890000	81900000		chr10	134270000	134280000	chr10	134450000	134460000		chr10	125770000	125780000	chr10	125950000	125960000		chr10	14630000	14640000	chr10	14860000	14870000
	chr10	49870000	49880000	chr10	50340000	50350000		chr10	13830000	13840000	chr10	14130000	14140000		chr10	124800000	124810000	chr10	125720000	125730000		chr10	73710000	73720000	chr10	74090000	74100000		chr10	43110000	43120000	chr10	43260000	43270000		chr10	125750000	125760000	chr10	126070000	126080000		chr10	7910000	7920000	chr10	9250000	9260000
	chr10	49870000	49880000	chr10	50180000	50190000		chr10	75890000	75900000	chr10	76500000	76510000		chr10	124800000	124810000	chr10	124890000	124900000		chr10	73720000	73730000	chr10	73970000	73980000		chr10	65110000	65120000	chr10	65490000	65500000		chr10	3710000	3720000	chr10	3790000	3800000		chr10	7910000	7920000	chr10	8090000	8100000
	chr10	15490000	15500000	chr10	15660000	15670000		chr10	75910000	75920000	chr10	76860000	76870000		chr10	59090000	59100000	chr10	59410000	59420000		chr10	73710000	73720000	chr10	73800000	73810000		chr10	65140000	65150000	chr10	65380000	65390000		chr10	74130000	74140000	chr10	74480000	74490000		chr10	7910000	7920000	chr10	9340000	9350000
	chr10	15470000	15480000	chr10	15760000	15770000		chr10	75880000	75890000	chr10	76790000	76800000		chr10	59090000	59100000	chr10	59820000	59830000		chr10	43690000	43700000	chr10	43840000	43850000		chr10	120860000	120870000	chr10	121170000	121180000		chr10	74130000	74140000	chr10	74360000	74370000		chr10	52820000	52830000	chr10	53180000	53190000
	chr10	89290000	89300000	chr10	89400000	89410000		chr10	75890000	75900000	chr10	76990000	77000000		chr10	59100000	59110000	chr10	59900000	59910000		chr10	43630000	43640000	chr10	43840000	43850000		chr10	120840000	120850000	chr10	120920000	120930000		chr10	74120000	74130000	chr10	74590000	74600000		chr10	52760000	52770000	chr10	53180000	53190000
	chr10	89270000	89280000	chr10	89490000	89500000		chr10	75910000	75920000	chr10	75990000	76000000		chr10	59090000	59100000	chr10	59600000	59610000		chr10	43660000	43670000	chr10	43960000	43970000		chr10	128190000	128200000	chr10	128420000	128430000		chr10	76010000	76020000	chr10	76810000	76820000		chr10	52820000	52830000	chr10	53720000	53730000
	chr10	6470000	6480000	chr10	7460000	7470000		chr10	105250000	105260000	chr10	105330000	105340000		chr10	80180000	80190000	chr10	80820000	80830000		chr10	81820000	81830000	chr10	81980000	81990000		chr10	37560000	37570000	chr10	37760000	37770000		chr10	76010000	76020000	chr10	76570000	76580000		chr10	52760000	52770000	chr10	53720000	53730000
	chr10	6480000	6490000	chr10	6560000	6570000		chr10	105260000	105270000	chr10	105440000	105450000		chr10	80180000	80190000	chr10	80950000	80960000		chr10	81800000	81810000	chr10	81890000	81900000		chr10	70990000	71000000	chr10	71150000	71160000		chr10	93500000	93510000	chr10	93670000	93680000		chr10	52810000	52820000	chr10	53970000	53980000
	chr10	6470000	6480000	chr10	7100000	7110000		chr10	35120000	35130000	chr10	35230000	35240000		chr10	80210000	80220000	chr10	80980000	80990000		chr10	4330000	4340000	chr10	4520000	4530000		chr10	70880000	70890000	chr10	70960000	70970000		chr10	98840000	98850000	chr10	98930000	98940000		chr10	52750000	52760000	chr10	53970000	53980000
	chr10	6450000	6460000	chr10	6800000	6810000		chr10	44690000	44700000	chr10	44800000	44810000		chr10	58860000	58870000	chr10	59070000	59080000		chr10	4310000	4320000	chr10	4800000	4810000		chr10	70860000	70870000	chr10	70950000	70960000		chr10	31360000	31370000	chr10	31590000	31600000		chr10	75260000	75270000	chr10	75490000	75500000
	chr10	22890000	22900000	chr10	22990000	23000000		chr10	44680000	44690000	chr10	45360000	45370000		chr10	125340000	125350000	chr10	125420000	125430000		chr10	4340000	4350000	chr10	4810000	4820000		chr10	70990000	71000000	chr10	71270000	71280000		chr10	31360000	31370000	chr10	31690000	31700000		chr10	75280000	75290000	chr10	75400000	75410000
	chr10	22860000	22870000	chr10	23350000	23360000		chr10	64020000	64030000	chr10	64240000	64250000		chr10	125340000	125350000	chr10	126070000	126080000		chr10	89870000	89880000	chr10	90300000	90310000		chr10	71000000	71010000	chr10	71470000	71480000		chr10	31370000	31380000	chr10	31760000	31770000		chr10	69610000	69620000	chr10	69910000	69920000
	chr10	22880000	22890000	chr10	23270000	23280000		chr10	64020000	64030000	chr10	64880000	64890000		chr10	125340000	125350000	chr10	125950000	125960000		chr10	25100000	25110000	chr10	25350000	25360000		chr10	70990000	71000000	chr10	71390000	71400000		chr10	14230000	14240000	chr10	14520000	14530000		chr10	69620000	69630000	chr10	70060000	70070000
	chr10	31080000	31090000	chr10	31300000	31310000		chr10	64020000	64030000	chr10	64190000	64200000		chr10	125340000	125350000	chr10	125720000	125730000		chr10	25100000	25110000	chr10	25240000	25250000		chr10	27010000	27020000	chr10	27160000	27170000		chr10	8940000	8950000	chr10	9250000	9260000		chr10	69660000	69670000	chr10	69820000	69830000
	chr10	31020000	31030000	chr10	31320000	31330000		chr10	64010000	64020000	chr10	64310000	64320000		chr10	105810000	105820000	chr10	105890000	105900000		chr10	5840000	5850000	chr10	5930000	5940000		chr10	52820000	52830000	chr10	53180000	53190000		chr10	35410000	35420000	chr10	35580000	35590000		chr10	97190000	97200000	chr10	97350000	97360000
	chr10	31030000	31040000	chr10	31630000	31640000		chr10	52040000	52050000	chr10	52160000	52170000		chr10	105860000	105870000	chr10	106090000	106100000		chr10	82130000	82140000	chr10	82410000	82420000		chr10	52770000	52780000	chr10	53180000	53190000		chr10	35410000	35420000	chr10	35500000	35510000		chr10	97210000	97220000	chr10	97320000	97330000
	chr10	31050000	31060000	chr10	32050000	32060000		chr10	52030000	52040000	chr10	52420000	52430000		chr10	105840000	105850000	chr10	105960000	105970000		chr10	82200000	82210000	chr10	82290000	82300000		chr10	52820000	52830000	chr10	53720000	53730000		chr10	26890000	26900000	chr10	27160000	27170000		chr10	64340000	64350000	chr10	64850000	64860000
	chr10	31010000	31020000	chr10	32060000	32070000		chr10	52030000	52040000	chr10	52380000	52390000		chr10	105880000	105890000	chr10	105960000	105970000		chr10	16380000	16390000	chr10	16580000	16590000		chr10	52750000	52760000	chr10	53970000	53980000		chr10	79150000	79160000	chr10	79400000	79410000		chr10	64340000	64350000	chr10	64910000	64920000
	chr10	31030000	31040000	chr10	31400000	31410000		chr10	52050000	52060000	chr10	52260000	52270000		chr10	105830000	105840000	chr10	106020000	106030000		chr10	16330000	16340000	chr10	16570000	16580000		chr10	86020000	86030000	chr10	86290000	86300000		chr10	104670000	104680000	chr10	104960000	104970000		chr10	13700000	13710000	chr10	13810000	13820000
	chr10	14230000	14240000	chr10	14490000	14500000		chr10	99670000	99680000	chr10	99800000	99810000		chr10	86130000	86140000	chr10	86290000	86300000		chr10	16350000	16360000	chr10	16810000	16820000		chr10	50270000	50280000	chr10	50540000	50550000		chr10	104670000	104680000	chr10	105000000	105010000		chr10	13700000	13710000	chr10	13970000	13980000
	chr10	99680000	99690000	chr10	99800000	99810000		chr10	99660000	99670000	chr10	100100000	100110000		chr10	86150000	86160000	chr10	86490000	86500000		chr10	135130000	135140000	chr10	135330000	135340000		chr10	72220000	72230000	chr10	72510000	72520000		chr10	104670000	104680000	chr10	104820000	104830000		chr10	13700000	13710000	chr10	14130000	14140000
	chr10	72830000	72840000	chr10	72960000	72970000		chr10	99660000	99670000	chr10	100160000	100170000		chr10	30700000	30710000	chr10	30820000	30830000		chr10	89610000	89620000	chr10	90140000	90150000		chr10	72220000	72230000	chr10	72300000	72310000		chr10	105720000	105730000	chr10	105870000	105880000		chr10	124810000	124820000	chr10	125140000	125150000
	chr10	72820000	72830000	chr10	73020000	73030000		chr10	96100000	96110000	chr10	96270000	96280000		chr10	30550000	30560000	chr10	30660000	30670000		chr10	89560000	89570000	chr10	90300000	90310000		chr10	72230000	72240000	chr10	72650000	72660000		chr10	86130000	86140000	chr10	86300000	86310000		chr10	124800000	124810000	chr10	125310000	125320000
	chr10	115210000	115220000	chr10	115290000	115300000		chr10	96110000	96120000	chr10	96310000	96320000		chr10	30570000	30580000	chr10	30850000	30860000		chr10	89610000	89620000	chr10	89870000	89880000		chr10	16150000	16160000	chr10	16810000	16820000		chr10	73670000	73680000	chr10	73810000	73820000		chr10	27180000	27190000	chr10	27640000	27650000
	chr10	98510000	98520000	chr10	98590000	98600000		chr10	96100000	96110000	chr10	96200000	96210000		chr10	34360000	34370000	chr10	34920000	34930000		chr10	89550000	89560000	chr10	89870000	89880000		chr10	79150000	79160000	chr10	79390000	79400000		chr10	73650000	73660000	chr10	73970000	73980000		chr10	15760000	15770000	chr10	15860000	15870000
	chr10	98530000	98540000	chr10	98800000	98810000		chr10	60290000	60300000	chr10	60390000	60400000		chr10	29280000	29290000	chr10	29400000	29410000		chr10	870000	880000	chr10	1040000	1050000		chr10	92510000	92520000	chr10	92620000	92630000		chr10	73650000	73660000	chr10	74070000	74080000		chr10	32580000	32590000	chr10	33210000	33220000
	chr10	4550000	4560000	chr10	4690000	4700000		chr10	60280000	60290000	chr10	60700000	60710000		chr10	29310000	29320000	chr10	29570000	29580000		chr10	43970000	43980000	chr10	44140000	44150000		chr10	62720000	62730000	chr10	63020000	63030000		chr10	4300000	4310000	chr10	4680000	4690000		chr10	32540000	32550000	chr10	32630000	32640000
	chr10	4560000	4570000	chr10	4800000	4810000		chr10	60290000	60300000	chr10	60980000	60990000		chr10	79600000	79610000	chr10	79730000	79740000		chr10	98140000	98150000	chr10	98320000	98330000		chr10	11150000	11160000	chr10	11290000	11300000		chr10	88450000	88460000	chr10	88650000	88660000		chr10	69840000	69850000	chr10	69920000	69930000
	chr10	43760000	43770000	chr10	43840000	43850000		chr10	60290000	60300000	chr10	60530000	60540000		chr10	79480000	79490000	chr10	79750000	79760000		chr10	98140000	98150000	chr10	98570000	98580000		chr10	12300000	12310000	chr10	13110000	13120000		chr10	121510000	121520000	chr10	121610000	121620000		chr10	69840000	69850000	chr10	70070000	70080000
	chr10	43740000	43750000	chr10	43950000	43960000		chr10	70990000	71000000	chr10	71150000	71160000		chr10	79560000	79570000	chr10	79910000	79920000		chr10	98150000	98160000	chr10	98250000	98260000		chr10	12250000	12260000	chr10	12940000	12950000		chr10	43780000	43790000	chr10	43950000	43960000		chr10	69810000	69820000	chr10	70070000	70080000
	chr10	116640000	116650000	chr10	116790000	116800000		chr10	70860000	70870000	chr10	71160000	71170000		chr10	123280000	123290000	chr10	123480000	123490000		chr10	98140000	98150000	chr10	98410000	98420000		chr10	12310000	12320000	chr10	12530000	12540000		chr10	43760000	43770000	chr10	43840000	43850000		chr10	135140000	135150000	chr10	135310000	135320000
	chr10	116650000	116660000	chr10	116840000	116850000		chr10	70990000	71000000	chr10	71260000	71270000		chr10	123220000	123230000	chr10	123470000	123480000		chr10	98120000	98130000	chr10	98960000	98970000		chr10	12300000	12310000	chr10	12750000	12760000		chr10	119270000	119280000	chr10	120000000	120010000		chr10	880000	890000	chr10	1040000	1050000
	chr10	69830000	69840000	chr10	69910000	69920000		chr10	92640000	92650000	chr10	93120000	93130000		chr10	123270000	123280000	chr10	123350000	123360000		chr10	98150000	98160000	chr10	98790000	98800000		chr10	12250000	12260000	chr10	12690000	12700000		chr10	25170000	25180000	chr10	25370000	25380000		chr10	54060000	54070000	chr10	54480000	54490000
	chr10	69830000	69840000	chr10	70070000	70080000		chr10	92650000	92660000	chr10	93010000	93020000		chr10	123160000	123170000	chr10	123350000	123360000		chr10	91890000	91900000	chr10	92350000	92360000		chr10	64020000	64030000	chr10	64150000	64160000		chr10	25150000	25160000	chr10	25240000	25250000		chr10	54060000	54070000	chr10	54250000	54260000
	chr10	76650000	76660000	chr10	76740000	76750000		chr10	92650000	92660000	chr10	92900000	92910000		chr10	123300000	123310000	chr10	123650000	123660000		chr10	62200000	62210000	chr10	62400000	62410000		chr10	64020000	64030000	chr10	64830000	64840000		chr10	99220000	99230000	chr10	99310000	99320000		chr10	54060000	54070000	chr10	54320000	54330000
	chr10	115910000	115920000	chr10	116190000	116200000		chr10	92670000	92680000	chr10	92750000	92760000		chr10	123230000	123240000	chr10	123650000	123660000		chr10	62200000	62210000	chr10	62530000	62540000		chr10	91190000	91200000	chr10	91390000	91400000		chr10	99210000	99220000	chr10	99380000	99390000		chr10	129510000	129520000	chr10	129610000	129620000
	chr10	115920000	115930000	chr10	116540000	116550000		chr10	121870000	121880000	chr10	122080000	122090000		chr10	115930000	115940000	chr10	116040000	116050000		chr10	27510000	27520000	chr10	27620000	27630000		chr10	91190000	91200000	chr10	91320000	91330000		chr10	99180000	99190000	chr10	99390000	99400000		chr10	129520000	129530000	chr10	129800000	129810000
	chr10	115880000	115890000	chr10	116520000	116530000		chr10	29780000	29790000	chr10	29870000	29880000		chr10	115880000	115890000	chr10	115980000	115990000		chr10	550000	560000	chr10	830000	840000		chr10	135140000	135150000	chr10	135340000	135350000		chr10	71070000	71080000	chr10	71150000	71160000		chr10	76870000	76880000	chr10	76970000	76980000
	chr10	115930000	115940000	chr10	116020000	116030000		chr10	29660000	29670000	chr10	29740000	29750000		chr10	115920000	115930000	chr10	116200000	116210000		chr10	121200000	121210000	chr10	121300000	121310000		chr10	130820000	130830000	chr10	131760000	131770000		chr10	88160000	88170000	chr10	88280000	88290000		chr10	32340000	32350000	chr10	32450000	32460000
	chr10	29410000	29420000	chr10	29590000	29600000		chr10	29800000	29810000	chr10	30020000	30030000		chr10	115920000	115930000	chr10	116290000	116300000		chr10	121200000	121210000	chr10	121330000	121340000		chr10	130820000	130830000	chr10	131130000	131140000		chr10	88160000	88170000	chr10	88330000	88340000		chr10	32350000	32360000	chr10	32490000	32500000
	chr10	29440000	29450000	chr10	29530000	29540000		chr10	29770000	29780000	chr10	30280000	30290000		chr10	132490000	132500000	chr10	133610000	133620000		chr10	32480000	32490000	chr10	32630000	32640000		chr10	123690000	123700000	chr10	123850000	123860000		chr10	61030000	61040000	chr10	61320000	61330000		chr10	32320000	32330000	chr10	32640000	32650000
	chr10	45160000	45170000	chr10	45340000	45350000		chr10	29670000	29680000	chr10	30290000	30300000		chr10	132480000	132490000	chr10	133100000	133110000		chr10	122180000	122190000	chr10	122490000	122500000		chr10	880000	890000	chr10	1050000	1060000		chr10	103350000	103360000	chr10	103530000	103540000		chr10	80610000	80620000	chr10	80950000	80960000
	chr10	33620000	33630000	chr10	33900000	33910000		chr10	29790000	29800000	chr10	30140000	30150000		chr10	2580000	2590000	chr10	3050000	3060000		chr10	120340000	120350000	chr10	120560000	120570000		chr10	860000	870000	chr10	1120000	1130000		chr10	101140000	101150000	chr10	101370000	101380000		chr10	2970000	2980000	chr10	3080000	3090000
	chr10	33620000	33630000	chr10	34160000	34170000		chr10	58920000	58930000	chr10	59050000	59060000		chr10	33210000	33220000	chr10	33290000	33300000		chr10	120330000	120340000	chr10	120460000	120470000		chr10	14530000	14540000	chr10	14860000	14870000		chr10	30020000	30030000	chr10	30140000	30150000		chr10	134950000	134960000	chr10	135050000	135060000
	chr10	33630000	33640000	chr10	34920000	34930000		chr10	89720000	89730000	chr10	90280000	90290000		chr10	33310000	33320000	chr10	33440000	33450000		chr10	120330000	120340000	chr10	120790000	120800000		chr10	14550000	14560000	chr10	15150000	15160000		chr10	30020000	30030000	chr10	30110000	30120000		chr10	134950000	134960000	chr10	135110000	135120000
	chr10	33600000	33610000	chr10	34370000	34380000		chr10	89730000	89740000	chr10	89870000	89880000		chr10	33300000	33310000	chr10	33570000	33580000		chr10	76780000	76790000	chr10	76990000	77000000		chr10	14530000	14540000	chr10	15020000	15030000		chr10	115470000	115480000	chr10	115610000	115620000		chr10	76490000	76500000	chr10	76770000	76780000
	chr10	33610000	33620000	chr10	34340000	34350000		chr10	89730000	89740000	chr10	90140000	90150000		chr10	23070000	23080000	chr10	23250000	23260000		chr10	76760000	76770000	chr10	76840000	76850000		chr10	94760000	94770000	chr10	95110000	95120000		chr10	115460000	115470000	chr10	115870000	115880000		chr10	53160000	53170000	chr10	53720000	53730000
	chr10	92670000	92680000	chr10	92760000	92770000		chr10	123490000	123500000	chr10	123640000	123650000		chr10	23050000	23060000	chr10	23340000	23350000		chr10	27730000	27740000	chr10	28460000	28470000		chr10	94770000	94780000	chr10	95040000	95050000		chr10	95670000	95680000	chr10	96070000	96080000		chr10	53190000	53200000	chr10	53960000	53970000
	chr10	92640000	92650000	chr10	92990000	93000000		chr10	8090000	8100000	chr10	8400000	8410000		chr10	3250000	3260000	chr10	4480000	4490000		chr10	27730000	27740000	chr10	27940000	27950000		chr10	94760000	94770000	chr10	95250000	95260000		chr10	77880000	77890000	chr10	78060000	78070000		chr10	80730000	80740000	chr10	80820000	80830000
	chr10	49420000	49430000	chr10	49500000	49510000		chr10	8120000	8130000	chr10	8200000	8210000		chr10	3280000	3290000	chr10	3670000	3680000		chr10	28720000	28730000	chr10	28820000	28830000		chr10	116060000	116070000	chr10	116540000	116550000		chr10	89880000	89890000	chr10	90300000	90310000		chr10	80740000	80750000	chr10	80950000	80960000
	chr10	49430000	49440000	chr10	49520000	49530000		chr10	8090000	8100000	chr10	8990000	9000000		chr10	3250000	3260000	chr10	3980000	3990000		chr10	14690000	14700000	chr10	14870000	14880000		chr10	116070000	116080000	chr10	116180000	116190000		chr10	89870000	89880000	chr10	90140000	90150000		chr10	63500000	63510000	chr10	63580000	63590000
	chr10	49430000	49440000	chr10	49720000	49730000		chr10	8080000	8090000	chr10	9060000	9070000		chr10	3250000	3260000	chr10	4530000	4540000		chr10	123260000	123270000	chr10	123350000	123360000		chr10	116050000	116060000	chr10	116460000	116470000		chr10	4000000	4010000	chr10	4080000	4090000		chr10	63510000	63520000	chr10	63760000	63770000
	chr10	123900000	123910000	chr10	123990000	124000000		chr10	8090000	8100000	chr10	8740000	8750000		chr10	3240000	3250000	chr10	4210000	4220000		chr10	123260000	123270000	chr10	123490000	123500000		chr10	116060000	116070000	chr10	116300000	116310000		chr10	3980000	3990000	chr10	4190000	4200000		chr10	63510000	63520000	chr10	64000000	64010000
	chr10	123890000	123900000	chr10	124190000	124200000		chr10	8100000	8110000	chr10	8910000	8920000		chr10	3230000	3240000	chr10	4810000	4820000		chr10	33010000	33020000	chr10	33310000	33320000		chr10	13210000	13220000	chr10	13470000	13480000		chr10	4010000	4020000	chr10	4690000	4700000		chr10	81130000	81140000	chr10	81220000	81230000
	chr10	123940000	123950000	chr10	124330000	124340000		chr10	8090000	8100000	chr10	8600000	8610000		chr10	3280000	3290000	chr10	3810000	3820000		chr10	35420000	35430000	chr10	35590000	35600000		chr10	13200000	13210000	chr10	13340000	13350000		chr10	3970000	3980000	chr10	4700000	4710000		chr10	104680000	104690000	chr10	105110000	105120000
	chr10	60300000	60310000	chr10	60690000	60700000		chr10	8060000	8070000	chr10	9240000	9250000		chr10	3260000	3270000	chr10	4380000	4390000		chr10	35410000	35420000	chr10	35500000	35510000		chr10	220000	230000	chr10	840000	850000		chr10	45750000	45760000	chr10	46140000	46150000		chr10	104670000	104680000	chr10	105000000	105010000
	chr10	60280000	60290000	chr10	60510000	60520000		chr10	8090000	8100000	chr10	9340000	9350000		chr10	3230000	3240000	chr10	4700000	4710000		chr10	35400000	35410000	chr10	35840000	35850000		chr10	230000	240000	chr10	540000	550000		chr10	21780000	21790000	chr10	22240000	22250000		chr10	104670000	104680000	chr10	104820000	104830000
	chr10	60270000	60280000	chr10	60940000	60950000		chr10	8030000	8040000	chr10	9240000	9250000		chr10	3280000	3290000	chr10	3500000	3510000		chr10	81280000	81290000	chr10	81990000	82000000		chr10	33480000	33490000	chr10	34500000	34510000		chr10	21820000	21830000	chr10	22010000	22020000		chr10	99030000	99040000	chr10	99110000	99120000
	chr10	80180000	80190000	chr10	80380000	80390000		chr10	119530000	119540000	chr10	119850000	119860000		chr10	3230000	3240000	chr10	4290000	4300000		chr10	81310000	81320000	chr10	81800000	81810000		chr10	33480000	33490000	chr10	34600000	34610000		chr10	21780000	21790000	chr10	22610000	22620000		chr10	74820000	74830000	chr10	74910000	74920000
	chr10	81280000	81290000	chr10	81780000	81790000		chr10	119510000	119520000	chr10	119990000	120000000		chr10	52170000	52180000	chr10	52380000	52390000		chr10	81290000	81300000	chr10	81880000	81890000		chr10	33490000	33500000	chr10	34650000	34660000		chr10	86020000	86030000	chr10	86280000	86290000		chr10	97010000	97020000	chr10	97360000	97370000
	chr10	81290000	81300000	chr10	81690000	81700000		chr10	115470000	115480000	chr10	115600000	115610000		chr10	52190000	52200000	chr10	52310000	52320000		chr10	81320000	81330000	chr10	81680000	81690000		chr10	33480000	33490000	chr10	34920000	34930000		chr10	71980000	71990000	chr10	72120000	72130000		chr10	97000000	97010000	chr10	97120000	97130000
	chr10	81300000	81310000	chr10	81880000	81890000		chr10	115460000	115470000	chr10	115870000	115880000		chr10	100220000	100230000	chr10	100500000	100510000		chr10	26040000	26050000	chr10	26560000	26570000		chr10	33460000	33470000	chr10	33900000	33910000		chr10	134270000	134280000	chr10	134450000	134460000		chr10	76290000	76300000	chr10	76380000	76390000
	chr10	81280000	81290000	chr10	81990000	82000000		chr10	62720000	62730000	chr10	63030000	63040000		chr10	100210000	100220000	chr10	101150000	101160000		chr10	91550000	91560000	chr10	91890000	91900000		chr10	33480000	33490000	chr10	33560000	33570000		chr10	134270000	134280000	chr10	134350000	134360000		chr10	76360000	76370000	chr10	76570000	76580000
	chr10	34080000	34090000	chr10	34920000	34930000		chr10	119900000	119910000	chr10	120200000	120210000		chr10	100220000	100230000	chr10	100930000	100940000		chr10	91560000	91570000	chr10	92530000	92540000		chr10	3570000	3580000	chr10	4700000	4710000		chr10	43630000	43640000	chr10	43930000	43940000		chr10	76360000	76370000	chr10	76780000	76790000
	chr10	34070000	34080000	chr10	34370000	34380000		chr10	119880000	119890000	chr10	119980000	119990000		chr10	100220000	100230000	chr10	101000000	101010000		chr10	91540000	91550000	chr10	92610000	92620000		chr10	3580000	3590000	chr10	3780000	3790000		chr10	43620000	43630000	chr10	43830000	43840000		chr10	76310000	76320000	chr10	76750000	76760000
	chr10	99250000	99260000	chr10	99370000	99380000		chr10	119890000	119900000	chr10	120290000	120300000		chr10	100220000	100230000	chr10	100420000	100430000		chr10	91550000	91560000	chr10	92350000	92360000		chr10	117170000	117180000	chr10	118060000	118070000		chr10	105470000	105480000	chr10	105610000	105620000		chr10	61000000	61010000	chr10	61330000	61340000
	chr10	99240000	99250000	chr10	99500000	99510000		chr10	13410000	13420000	chr10	13800000	13810000		chr10	100220000	100230000	chr10	100800000	100810000		chr10	28370000	28380000	chr10	28680000	28690000		chr10	117190000	117200000	chr10	118140000	118150000		chr10	17330000	17340000	chr10	17470000	17480000		chr10	61000000	61010000	chr10	61220000	61230000
	chr10	99210000	99220000	chr10	99310000	99320000		chr10	13410000	13420000	chr10	13570000	13580000		chr10	103060000	103070000	chr10	103200000	103210000		chr10	73570000	73580000	chr10	73650000	73660000		chr10	42960000	42970000	chr10	43180000	43190000		chr10	101210000	101220000	chr10	101360000	101370000		chr10	117710000	117720000	chr10	118050000	118060000
	chr10	111670000	111680000	chr10	111870000	111880000		chr10	13360000	13370000	chr10	13560000	13570000		chr10	102970000	102980000	chr10	103050000	103060000		chr10	73600000	73610000	chr10	74080000	74090000		chr10	42970000	42980000	chr10	43250000	43260000		chr10	101190000	101200000	chr10	101430000	101440000		chr10	78780000	78790000	chr10	78860000	78870000
	chr10	111640000	111650000	chr10	111770000	111780000		chr10	65630000	65640000	chr10	65730000	65740000		chr10	102930000	102940000	chr10	103400000	103410000		chr10	73600000	73610000	chr10	73990000	74000000		chr10	72310000	72320000	chr10	72510000	72520000		chr10	2970000	2980000	chr10	3080000	3090000		chr10	90780000	90790000	chr10	91140000	91150000
	chr10	111640000	111650000	chr10	112030000	112040000		chr10	59610000	59620000	chr10	59820000	59830000		chr10	102970000	102980000	chr10	103530000	103540000		chr10	73590000	73600000	chr10	73800000	73810000		chr10	72310000	72320000	chr10	72960000	72970000		chr10	114710000	114720000	chr10	114870000	114880000		chr10	90800000	90810000	chr10	90880000	90890000
	chr10	97190000	97200000	chr10	97340000	97350000		chr10	59610000	59620000	chr10	59900000	59910000		chr10	102970000	102980000	chr10	103330000	103340000		chr10	23990000	24000000	chr10	24840000	24850000		chr10	72310000	72320000	chr10	72640000	72650000		chr10	61380000	61390000	chr10	61790000	61800000		chr10	90700000	90710000	chr10	90870000	90880000
	chr10	134140000	134150000	chr10	134260000	134270000		chr10	59660000	59670000	chr10	59900000	59910000		chr10	102950000	102960000	chr10	103850000	103860000		chr10	24010000	24020000	chr10	24220000	24230000		chr10	72380000	72390000	chr10	72640000	72650000		chr10	61380000	61390000	chr10	61600000	61610000		chr10	90690000	90700000	chr10	90770000	90780000
	chr10	134030000	134040000	chr10	134260000	134270000		chr10	85820000	85830000	chr10	85960000	85970000		chr10	128080000	128090000	chr10	128430000	128440000		chr10	21800000	21810000	chr10	22000000	22010000		chr10	55590000	55600000	chr10	56160000	56170000		chr10	123800000	123810000	chr10	123890000	123900000		chr10	90780000	90790000	chr10	90970000	90980000
	chr10	134040000	134050000	chr10	134140000	134150000		chr10	11820000	11830000	chr10	12020000	12030000		chr10	128070000	128080000	chr10	128190000	128200000		chr10	21800000	21810000	chr10	22240000	22250000		chr10	80520000	80530000	chr10	80940000	80950000		chr10	70990000	71000000	chr10	71150000	71160000		chr10	93250000	93260000	chr10	93440000	93450000
	chr10	134060000	134070000	chr10	134460000	134470000		chr10	11820000	11830000	chr10	12170000	12180000		chr10	13830000	13840000	chr10	14520000	14530000		chr10	97000000	97010000	chr10	97110000	97120000		chr10	3510000	3520000	chr10	4170000	4180000		chr10	70990000	71000000	chr10	71070000	71080000		chr10	93250000	93260000	chr10	93390000	93400000
	chr10	134000000	134010000	chr10	134450000	134460000		chr10	11870000	11880000	chr10	12160000	12170000		chr10	13830000	13840000	chr10	14230000	14240000		chr10	95310000	95320000	chr10	95570000	95580000		chr10	3500000	3510000	chr10	4090000	4100000		chr10	70990000	71000000	chr10	71270000	71280000		chr10	35520000	35530000	chr10	35620000	35630000
	chr10	70150000	70160000	chr10	70660000	70670000		chr10	74830000	74840000	chr10	74910000	74920000		chr10	13830000	13840000	chr10	14040000	14050000		chr10	95310000	95320000	chr10	95440000	95450000		chr10	3470000	3480000	chr10	4100000	4110000		chr10	75290000	75300000	chr10	75400000	75410000		chr10	35530000	35540000	chr10	35840000	35850000
	chr10	63860000	63870000	chr10	64190000	64200000		chr10	74720000	74730000	chr10	74960000	74970000		chr10	13830000	13840000	chr10	14130000	14140000		chr10	103350000	103360000	chr10	103730000	103740000		chr10	3510000	3520000	chr10	4700000	4710000		chr10	11550000	11560000	chr10	11760000	11770000		chr10	15030000	15040000	chr10	15140000	15150000
	chr10	63800000	63810000	chr10	64180000	64190000		chr10	74820000	74830000	chr10	74980000	74990000		chr10	13830000	13840000	chr10	14340000	14350000		chr10	103370000	103380000	chr10	103530000	103540000		chr10	3500000	3510000	chr10	3670000	3680000		chr10	11560000	11570000	chr10	11640000	11650000		chr10	14930000	14940000	chr10	15120000	15130000
	chr10	63860000	63870000	chr10	63990000	64000000		chr10	91180000	91190000	chr10	91460000	91470000		chr10	13830000	13840000	chr10	14430000	14440000		chr10	3270000	3280000	chr10	3950000	3960000		chr10	3510000	3520000	chr10	3810000	3820000		chr10	64030000	64040000	chr10	64170000	64180000		chr10	14920000	14930000	chr10	15000000	15010000
	chr10	73230000	73240000	chr10	73570000	73580000		chr10	91180000	91190000	chr10	91320000	91330000		chr10	11830000	11840000	chr10	12020000	12030000		chr10	3220000	3230000	chr10	3930000	3940000		chr10	3500000	3510000	chr10	3890000	3900000		chr10	115710000	115720000	chr10	115790000	115800000		chr10	50080000	50090000	chr10	50360000	50370000
	chr10	73240000	73250000	chr10	73470000	73480000		chr10	126440000	126450000	chr10	126520000	126530000		chr10	11820000	11830000	chr10	12170000	12180000		chr10	3280000	3290000	chr10	3460000	3470000		chr10	3510000	3520000	chr10	4810000	4820000		chr10	115690000	115700000	chr10	115860000	115870000		chr10	50080000	50090000	chr10	50720000	50730000
	chr10	46950000	46960000	chr10	47600000	47610000		chr10	126520000	126530000	chr10	126640000	126650000		chr10	11820000	11830000	chr10	12230000	12240000		chr10	3230000	3240000	chr10	4700000	4710000		chr10	62420000	62430000	chr10	62500000	62510000		chr10	89600000	89610000	chr10	90300000	90310000		chr10	80190000	80200000	chr10	80670000	80680000
	chr10	46980000	46990000	chr10	47070000	47080000		chr10	126550000	126560000	chr10	127050000	127060000		chr10	69620000	69630000	chr10	69740000	69750000		chr10	3260000	3270000	chr10	4490000	4500000		chr10	62410000	62420000	chr10	62520000	62530000		chr10	89620000	89630000	chr10	90140000	90150000		chr10	80190000	80200000	chr10	80960000	80970000
	chr10	46950000	46960000	chr10	48380000	48390000		chr10	69420000	69430000	chr10	69530000	69540000		chr10	69610000	69620000	chr10	70060000	70070000		chr10	3280000	3290000	chr10	3670000	3680000		chr10	87750000	87760000	chr10	88120000	88130000		chr10	72310000	72320000	chr10	72630000	72640000		chr10	102430000	102440000	chr10	102630000	102640000
	chr10	71720000	71730000	chr10	71800000	71810000		chr10	33000000	33010000	chr10	33300000	33310000		chr10	69740000	69750000	chr10	70060000	70070000		chr10	3280000	3290000	chr10	3810000	3820000		chr10	74120000	74130000	chr10	74820000	74830000		chr10	72300000	72310000	chr10	72510000	72520000		chr10	103990000	104000000	chr10	104230000	104240000
	chr10	75900000	75910000	chr10	76860000	76870000		chr10	33010000	33020000	chr10	33460000	33470000		chr10	69660000	69670000	chr10	70500000	70510000		chr10	3250000	3260000	chr10	4400000	4410000		chr10	74120000	74130000	chr10	74910000	74920000		chr10	4090000	4100000	chr10	4170000	4180000		chr10	103930000	103940000	chr10	104240000	104250000
	chr10	75890000	75900000	chr10	75990000	76000000		chr10	33000000	33010000	chr10	33400000	33410000		chr10	69610000	69620000	chr10	69960000	69970000		chr10	3230000	3240000	chr10	4800000	4810000		chr10	74120000	74130000	chr10	74590000	74600000		chr10	29420000	29430000	chr10	29570000	29580000		chr10	103990000	104000000	chr10	104340000	104350000
	chr10	75910000	75920000	chr10	76980000	76990000		chr10	24280000	24290000	chr10	24790000	24800000		chr10	69730000	69740000	chr10	69940000	69950000		chr10	3250000	3260000	chr10	4310000	4320000		chr10	74140000	74150000	chr10	74310000	74320000		chr10	29420000	29430000	chr10	29500000	29510000		chr10	103930000	103940000	chr10	104350000	104360000
	chr10	5150000	5160000	chr10	5410000	5420000		chr10	24280000	24290000	chr10	24480000	24490000		chr10	69730000	69740000	chr10	69810000	69820000		chr10	3270000	3280000	chr10	4070000	4080000		chr10	74130000	74140000	chr10	74460000	74470000		chr10	100220000	100230000	chr10	101020000	101030000		chr10	103990000	104000000	chr10	104110000	104120000
	chr10	5150000	5160000	chr10	5460000	5470000		chr10	24290000	24300000	chr10	24640000	24650000		chr10	44550000	44560000	chr10	44840000	44850000		chr10	24280000	24290000	chr10	24800000	24810000		chr10	46980000	46990000	chr10	47600000	47610000		chr10	24280000	24290000	chr10	24540000	24550000		chr10	74130000	74140000	chr10	74910000	74920000
	chr10	5140000	5150000	chr10	5310000	5320000		chr10	25730000	25740000	chr10	25900000	25910000		chr10	44540000	44550000	chr10	45350000	45360000		chr10	24280000	24290000	chr10	24640000	24650000		chr10	22730000	22740000	chr10	23280000	23290000		chr10	24290000	24300000	chr10	24640000	24650000		chr10	74120000	74130000	chr10	74810000	74820000
	chr10	5190000	5200000	chr10	5280000	5290000		chr10	27420000	27430000	chr10	27510000	27520000		chr10	27020000	27030000	chr10	27430000	27440000		chr10	24280000	24290000	chr10	24480000	24490000		chr10	120020000	120030000	chr10	120180000	120190000		chr10	24290000	24300000	chr10	24480000	24490000		chr10	74120000	74130000	chr10	74450000	74460000
	chr10	104910000	104920000	chr10	105000000	105010000		chr10	106160000	106170000	chr10	106380000	106390000		chr10	27030000	27040000	chr10	27370000	27380000		chr10	120830000	120840000	chr10	120920000	120930000		chr10	105640000	105650000	chr10	106090000	106100000		chr10	24290000	24300000	chr10	24790000	24800000		chr10	74150000	74160000	chr10	74750000	74760000
	chr10	104830000	104840000	chr10	105090000	105100000		chr10	2970000	2980000	chr10	3080000	3090000		chr10	27010000	27020000	chr10	27160000	27170000		chr10	120800000	120810000	chr10	120880000	120890000		chr10	105640000	105650000	chr10	105970000	105980000		chr10	34590000	34600000	chr10	34780000	34790000		chr10	74120000	74130000	chr10	74630000	74640000
	chr10	133250000	133260000	chr10	133620000	133630000		chr10	33210000	33220000	chr10	33290000	33300000		chr10	52420000	52430000	chr10	52640000	52650000		chr10	29430000	29440000	chr10	29520000	29530000		chr10	105640000	105650000	chr10	105880000	105890000		chr10	93300000	93310000	chr10	93670000	93680000		chr10	46980000	46990000	chr10	47600000	47610000
	chr10	75760000	75770000	chr10	75850000	75860000		chr10	33300000	33310000	chr10	33530000	33540000		chr10	134460000	134470000	chr10	134630000	134640000		chr10	29400000	29410000	chr10	29580000	29590000		chr10	105650000	105660000	chr10	105730000	105740000		chr10	93310000	93320000	chr10	93390000	93400000		chr10	112360000	112370000	chr10	112650000	112660000
	chr10	75730000	75740000	chr10	75980000	75990000		chr10	33300000	33310000	chr10	33440000	33450000		chr10	134470000	134480000	chr10	134920000	134930000		chr10	32150000	32160000	chr10	32290000	32300000		chr10	118440000	118450000	chr10	118530000	118540000		chr10	4700000	4710000	chr10	4800000	4810000		chr10	112360000	112370000	chr10	112490000	112500000
	chr10	109160000	109170000	chr10	109560000	109570000		chr10	33200000	33210000	chr10	33440000	33450000		chr10	69970000	69980000	chr10	70650000	70660000		chr10	32150000	32160000	chr10	32230000	32240000		chr10	118440000	118450000	chr10	118930000	118940000		chr10	33620000	33630000	chr10	34910000	34920000		chr10	12300000	12310000	chr10	13110000	13120000
	chr10	43350000	43360000	chr10	43590000	43600000		chr10	290000	300000	chr10	850000	860000		chr10	69970000	69980000	chr10	70060000	70070000		chr10	32100000	32110000	chr10	32650000	32660000		chr10	54400000	54410000	chr10	54480000	54490000		chr10	33650000	33660000	chr10	33790000	33800000		chr10	12300000	12310000	chr10	12940000	12950000
	chr10	43350000	43360000	chr10	43950000	43960000		chr10	300000	310000	chr10	520000	530000		chr10	69990000	70000000	chr10	70460000	70470000		chr10	32120000	32130000	chr10	32470000	32480000		chr10	69860000	69870000	chr10	70060000	70070000		chr10	33620000	33630000	chr10	34590000	34600000		chr10	12300000	12310000	chr10	12690000	12700000
	chr10	72380000	72390000	chr10	72630000	72640000		chr10	130820000	130830000	chr10	131190000	131200000		chr10	129510000	129520000	chr10	129860000	129870000		chr10	102970000	102980000	chr10	103200000	103210000		chr10	69830000	69840000	chr10	69910000	69920000		chr10	33620000	33630000	chr10	34500000	34510000		chr10	12300000	12310000	chr10	12510000	12520000
	chr10	127840000	127850000	chr10	128190000	128200000		chr10	130820000	130830000	chr10	131860000	131870000		chr10	129510000	129520000	chr10	129960000	129970000		chr10	103060000	103070000	chr10	103210000	103220000		chr10	97000000	97010000	chr10	97110000	97120000		chr10	33620000	33630000	chr10	34810000	34820000		chr10	15950000	15960000	chr10	16810000	16820000
	chr10	127880000	127890000	chr10	128070000	128080000		chr10	64760000	64770000	chr10	64910000	64920000		chr10	129510000	129520000	chr10	129650000	129660000		chr10	102970000	102980000	chr10	103530000	103540000		chr10	97000000	97010000	chr10	97350000	97360000		chr10	33630000	33640000	chr10	34020000	34030000		chr10	15950000	15960000	chr10	16580000	16590000
	chr10	123570000	123580000	chr10	123650000	123660000		chr10	64800000	64810000	chr10	65400000	65410000		chr10	34810000	34820000	chr10	34910000	34920000		chr10	102970000	102980000	chr10	103320000	103330000		chr10	122910000	122920000	chr10	123340000	123350000		chr10	33620000	33630000	chr10	34160000	34170000		chr10	125750000	125760000	chr10	125850000	125860000
	chr10	123490000	123500000	chr10	123630000	123640000		chr10	15300000	15310000	chr10	15410000	15420000		chr10	50340000	50350000	chr10	50720000	50730000		chr10	103050000	103060000	chr10	103320000	103330000		chr10	122970000	122980000	chr10	123470000	123480000		chr10	76580000	76590000	chr10	76860000	76870000		chr10	125750000	125760000	chr10	126070000	126080000
	chr10	17470000	17480000	chr10	17610000	17620000		chr10	36070000	36080000	chr10	37060000	37070000		chr10	6050000	6060000	chr10	6440000	6450000		chr10	30150000	30160000	chr10	30250000	30260000		chr10	122910000	122920000	chr10	123650000	123660000		chr10	61860000	61870000	chr10	61960000	61970000		chr10	103360000	103370000	chr10	103530000	103540000
	chr10	120560000	120570000	chr10	120770000	120780000		chr10	36060000	36070000	chr10	36290000	36300000		chr10	5990000	6000000	chr10	6090000	6100000		chr10	72960000	72970000	chr10	73040000	73050000		chr10	76590000	76600000	chr10	76680000	76690000		chr10	61870000	61880000	chr10	62190000	62200000		chr10	105380000	105390000	chr10	105620000	105630000
	chr10	110760000	110770000	chr10	111170000	111180000		chr10	125610000	125620000	chr10	125710000	125720000		chr10	123680000	123690000	chr10	124000000	124010000		chr10	90590000	90600000	chr10	90680000	90690000		chr10	113890000	113900000	chr10	114060000	114070000		chr10	105800000	105810000	chr10	105960000	105970000		chr10	105360000	105370000	chr10	105440000	105450000
	chr10	110810000	110820000	chr10	111440000	111450000		chr10	44540000	44550000	chr10	44780000	44790000		chr10	123740000	123750000	chr10	124190000	124200000		chr10	90590000	90600000	chr10	90960000	90970000		chr10	113940000	113950000	chr10	114060000	114070000		chr10	120330000	120340000	chr10	120480000	120490000		chr10	85910000	85920000	chr10	86300000	86310000
	chr10	2980000	2990000	chr10	3070000	3080000		chr10	44570000	44580000	chr10	44790000	44800000		chr10	123700000	123710000	chr10	124190000	124200000		chr10	74450000	74460000	chr10	74590000	74600000		chr10	113910000	113920000	chr10	114220000	114230000		chr10	3400000	3410000	chr10	3490000	3500000		chr10	34510000	34520000	chr10	34920000	34930000
	chr10	27020000	27030000	chr10	27160000	27170000		chr10	44530000	44540000	chr10	44860000	44870000		chr10	123730000	123740000	chr10	123870000	123880000		chr10	74450000	74460000	chr10	74780000	74790000		chr10	85910000	85920000	chr10	86280000	86290000		chr10	22720000	22730000	chr10	22970000	22980000		chr10	88160000	88170000	chr10	88240000	88250000
	chr10	27030000	27040000	chr10	27640000	27650000		chr10	96020000	96030000	chr10	96270000	96280000		chr10	7160000	7170000	chr10	7450000	7460000		chr10	35100000	35110000	chr10	35260000	35270000		chr10	82460000	82470000	chr10	82670000	82680000		chr10	22720000	22730000	chr10	22910000	22920000		chr10	88160000	88170000	chr10	88340000	88350000
	chr10	111760000	111770000	chr10	111890000	111900000		chr10	96030000	96040000	chr10	96200000	96210000		chr10	10020000	10030000	chr10	11100000	11110000		chr10	131170000	131180000	chr10	131670000	131680000		chr10	82430000	82440000	chr10	82770000	82780000		chr10	22720000	22730000	chr10	23270000	23280000		chr10	96110000	96120000	chr10	96200000	96210000
	chr10	111790000	111800000	chr10	112300000	112310000		chr10	98150000	98160000	chr10	98790000	98800000		chr10	91180000	91190000	chr10	91460000	91470000		chr10	64370000	64380000	chr10	64820000	64830000		chr10	82450000	82460000	chr10	82930000	82940000		chr10	22720000	22730000	chr10	23350000	23360000		chr10	71970000	71980000	chr10	72300000	72310000
	chr10	111780000	111790000	chr10	112040000	112050000		chr10	98150000	98160000	chr10	98380000	98390000		chr10	91180000	91190000	chr10	91320000	91330000		chr10	64350000	64360000	chr10	64910000	64920000		chr10	68700000	68710000	chr10	69270000	69280000		chr10	92850000	92860000	chr10	93000000	93010000		chr10	71980000	71990000	chr10	72120000	72130000
	chr10	111740000	111750000	chr10	112040000	112050000		chr10	98150000	98160000	chr10	98490000	98500000		chr10	91170000	91180000	chr10	91610000	91620000		chr10	64370000	64380000	chr10	64580000	64590000		chr10	61000000	61010000	chr10	61220000	61230000		chr10	35640000	35650000	chr10	35830000	35840000		chr10	76180000	76190000	chr10	76770000	76780000
	chr10	48410000	48420000	chr10	48660000	48670000		chr10	98140000	98150000	chr10	98570000	98580000		chr10	63800000	63810000	chr10	64190000	64200000		chr10	97180000	97190000	chr10	97360000	97370000		chr10	60990000	61000000	chr10	61560000	61570000		chr10	28000000	28010000	chr10	28670000	28680000		chr10	22870000	22880000	chr10	23350000	23360000
	chr10	78940000	78950000	chr10	79450000	79460000		chr10	98150000	98160000	chr10	98980000	98990000		chr10	63800000	63810000	chr10	64000000	64010000		chr10	117550000	117560000	chr10	118040000	118050000		chr10	61000000	61010000	chr10	61330000	61340000		chr10	28020000	28030000	chr10	28530000	28540000		chr10	22820000	22830000	chr10	23360000	23370000
	chr10	78940000	78950000	chr10	79400000	79410000		chr10	98140000	98150000	chr10	98260000	98270000		chr10	121590000	121600000	chr10	121670000	121680000		chr10	53140000	53150000	chr10	53750000	53760000		chr10	90040000	90050000	chr10	90120000	90130000		chr10	28040000	28050000	chr10	28460000	28470000		chr10	22910000	22920000	chr10	22990000	23000000
	chr10	78940000	78950000	chr10	79150000	79160000		chr10	23060000	23070000	chr10	23160000	23170000		chr10	132730000	132740000	chr10	133040000	133050000		chr10	8400000	8410000	chr10	8810000	8820000		chr10	21800000	21810000	chr10	22620000	22630000		chr10	32150000	32160000	chr10	32290000	32300000		chr10	22870000	22880000	chr10	23120000	23130000
	chr10	99020000	99030000	chr10	99100000	99110000		chr10	23060000	23070000	chr10	23360000	23370000		chr10	132740000	132750000	chr10	133120000	133130000		chr10	8400000	8410000	chr10	8900000	8910000		chr10	21780000	21790000	chr10	22540000	22550000		chr10	32150000	32160000	chr10	32480000	32490000		chr10	22840000	22850000	chr10	23270000	23280000
	chr10	68830000	68840000	chr10	69280000	69290000		chr10	23020000	23030000	chr10	23350000	23360000		chr10	120580000	120590000	chr10	120780000	120790000		chr10	8400000	8410000	chr10	9250000	9260000		chr10	21790000	21800000	chr10	22690000	22700000		chr10	32150000	32160000	chr10	32230000	32240000		chr10	33480000	33490000	chr10	34920000	34930000
	chr10	77660000	77670000	chr10	78060000	78070000		chr10	23030000	23040000	chr10	23270000	23280000		chr10	128490000	128500000	chr10	129460000	129470000		chr10	120610000	120620000	chr10	120780000	120790000		chr10	21800000	21810000	chr10	22220000	22230000		chr10	8400000	8410000	chr10	8620000	8630000		chr10	33500000	33510000	chr10	33590000	33600000
	chr10	77680000	77690000	chr10	77780000	77790000		chr10	22720000	22730000	chr10	22800000	22810000		chr10	54570000	54580000	chr10	54690000	54700000		chr10	24920000	24930000	chr10	25000000	25010000		chr10	21780000	21790000	chr10	22010000	22020000		chr10	8410000	8420000	chr10	8910000	8920000		chr10	32150000	32160000	chr10	32230000	32240000
	chr10	91340000	91350000	chr10	91430000	91440000		chr10	22630000	22640000	chr10	22820000	22830000		chr10	54570000	54580000	chr10	54960000	54970000		chr10	24890000	24900000	chr10	25510000	25520000		chr10	95670000	95680000	chr10	96070000	96080000		chr10	62720000	62730000	chr10	62900000	62910000		chr10	32160000	32170000	chr10	32290000	32300000
	chr10	133840000	133850000	chr10	133950000	133960000		chr10	22550000	22560000	chr10	22820000	22830000		chr10	54570000	54580000	chr10	55060000	55070000		chr10	24930000	24940000	chr10	25360000	25370000		chr10	95670000	95680000	chr10	95810000	95820000		chr10	33480000	33490000	chr10	33620000	33630000		chr10	32140000	32150000	chr10	32480000	32490000
	chr10	38150000	38160000	chr10	38240000	38250000		chr10	22620000	22630000	chr10	22720000	22730000		chr10	54580000	54590000	chr10	56160000	56170000		chr10	24910000	24920000	chr10	25300000	25310000		chr10	95680000	95690000	chr10	95990000	96000000		chr10	33480000	33490000	chr10	33570000	33580000		chr10	32130000	32140000	chr10	32450000	32460000
	chr10	32550000	32560000	chr10	32640000	32650000		chr10	22630000	22640000	chr10	22980000	22990000		chr10	54570000	54580000	chr10	55120000	55130000		chr10	24910000	24920000	chr10	25100000	25110000		chr10	95660000	95670000	chr10	96180000	96190000		chr10	105170000	105180000	chr10	105250000	105260000		chr10	134160000	134170000	chr10	134260000	134270000
	chr10	6810000	6820000	chr10	7450000	7460000		chr10	22630000	22640000	chr10	23020000	23030000		chr10	54580000	54590000	chr10	55330000	55340000		chr10	26620000	26630000	chr10	26840000	26850000		chr10	27170000	27180000	chr10	27390000	27400000		chr10	44170000	44180000	chr10	45340000	45350000		chr10	134200000	134210000	chr10	134350000	134360000
	chr10	52770000	52780000	chr10	53950000	53960000		chr10	22630000	22640000	chr10	23350000	23360000		chr10	54580000	54590000	chr10	55750000	55760000		chr10	26620000	26630000	chr10	27170000	27180000		chr10	27180000	27190000	chr10	27640000	27650000		chr10	44180000	44190000	chr10	44870000	44880000		chr10	134190000	134200000	chr10	134440000	134450000
	chr10	52840000	52850000	chr10	53940000	53950000		chr10	22610000	22620000	chr10	23270000	23280000		chr10	54570000	54580000	chr10	55590000	55600000		chr10	13400000	13410000	chr10	13830000	13840000		chr10	27170000	27180000	chr10	27480000	27490000		chr10	12390000	12400000	chr10	12480000	12490000		chr10	64590000	64600000	chr10	64820000	64830000
	chr10	52790000	52800000	chr10	53720000	53730000		chr10	22760000	22770000	chr10	23280000	23290000		chr10	54580000	54590000	chr10	55550000	55560000		chr10	13410000	13420000	chr10	13490000	13500000		chr10	118550000	118560000	chr10	118930000	118940000		chr10	12380000	12390000	chr10	12640000	12650000		chr10	64570000	64580000	chr10	64920000	64930000
	chr10	52840000	52850000	chr10	53730000	53740000		chr10	22670000	22680000	chr10	23270000	23280000		chr10	53400000	53410000	chr10	53960000	53970000		chr10	13410000	13420000	chr10	13550000	13560000		chr10	52130000	52140000	chr10	52380000	52390000		chr10	12380000	12390000	chr10	12680000	12690000		chr10	114070000	114080000	chr10	114190000	114200000
	chr10	52830000	52840000	chr10	53140000	53150000		chr10	115140000	115150000	chr10	115280000	115290000		chr10	53390000	53400000	chr10	53710000	53720000		chr10	80190000	80200000	chr10	80950000	80960000		chr10	22610000	22620000	chr10	22910000	22920000		chr10	73070000	73080000	chr10	73320000	73330000		chr10	630000	640000	chr10	830000	840000
	chr10	52760000	52770000	chr10	53180000	53190000		chr10	31010000	31020000	chr10	31980000	31990000		chr10	12040000	12050000	chr10	12140000	12150000		chr10	133320000	133330000	chr10	133660000	133670000		chr10	22600000	22610000	chr10	22720000	22730000		chr10	73070000	73080000	chr10	73410000	73420000		chr10	99920000	99930000	chr10	100160000	100170000
	chr10	52830000	52840000	chr10	53190000	53200000		chr10	31010000	31020000	chr10	31950000	31960000		chr10	12060000	12070000	chr10	12230000	12240000		chr10	46980000	46990000	chr10	47590000	47600000		chr10	22610000	22620000	chr10	22970000	22980000		chr10	73060000	73070000	chr10	73570000	73580000		chr10	99930000	99940000	chr10	100060000	100070000
	chr10	27650000	27660000	chr10	27940000	27950000		chr10	31070000	31080000	chr10	31320000	31330000		chr10	79250000	79260000	chr10	79360000	79370000		chr10	46960000	46970000	chr10	48380000	48390000		chr10	22620000	22630000	chr10	23270000	23280000		chr10	73070000	73080000	chr10	73490000	73500000		chr10	32470000	32480000	chr10	32650000	32660000
	chr10	27660000	27670000	chr10	28530000	28540000		chr10	31010000	31020000	chr10	32090000	32100000		chr10	71350000	71360000	chr10	71830000	71840000		chr10	46980000	46990000	chr10	47140000	47150000		chr10	96890000	96900000	chr10	97130000	97140000		chr10	73070000	73080000	chr10	73630000	73640000		chr10	116060000	116070000	chr10	116540000	116550000
	chr10	27660000	27670000	chr10	27830000	27840000		chr10	30950000	30960000	chr10	32090000	32100000		chr10	71320000	71330000	chr10	71690000	71700000		chr10	125760000	125770000	chr10	126420000	126430000		chr10	73230000	73240000	chr10	73320000	73330000		chr10	74360000	74370000	chr10	74440000	74450000		chr10	116060000	116070000	chr10	116450000	116460000
	chr10	44030000	44040000	chr10	44120000	44130000		chr10	30930000	30940000	chr10	32060000	32070000		chr10	64600000	64610000	chr10	64750000	64760000		chr10	125750000	125760000	chr10	126150000	126160000		chr10	73250000	73260000	chr10	73560000	73570000		chr10	74380000	74390000	chr10	74590000	74600000		chr10	116060000	116070000	chr10	116300000	116310000
	chr10	21780000	21790000	chr10	22220000	22230000		chr10	31020000	31030000	chr10	31590000	31600000		chr10	64570000	64580000	chr10	64910000	64920000		chr10	125750000	125760000	chr10	126210000	126220000		chr10	49860000	49870000	chr10	50370000	50380000		chr10	38290000	38300000	chr10	38380000	38390000		chr10	116060000	116070000	chr10	116190000	116200000
	chr10	90770000	90780000	chr10	91140000	91150000		chr10	31070000	31080000	chr10	31600000	31610000		chr10	64600000	64610000	chr10	64840000	64850000		chr10	125760000	125770000	chr10	125860000	125870000		chr10	49860000	49870000	chr10	50710000	50720000		chr10	35540000	35550000	chr10	35840000	35850000		chr10	126310000	126320000	chr10	126430000	126440000
	chr10	90790000	90800000	chr10	90970000	90980000		chr10	31070000	31080000	chr10	31480000	31490000		chr10	64600000	64610000	chr10	64700000	64710000		chr10	125750000	125760000	chr10	126070000	126080000		chr10	49860000	49870000	chr10	50620000	50630000		chr10	62200000	62210000	chr10	62490000	62500000		chr10	103030000	103040000	chr10	103200000	103210000
	chr10	23830000	23840000	chr10	24850000	24860000		chr10	31030000	31040000	chr10	31680000	31690000		chr10	64580000	64590000	chr10	65520000	65530000		chr10	125750000	125760000	chr10	125960000	125970000		chr10	49870000	49880000	chr10	50170000	50180000		chr10	62230000	62240000	chr10	62400000	62410000		chr10	103030000	103040000	chr10	103320000	103330000
	chr10	69610000	69620000	chr10	69950000	69960000		chr10	31010000	31020000	chr10	31780000	31790000		chr10	54640000	54650000	chr10	54960000	54970000		chr10	22020000	22030000	chr10	22220000	22230000		chr10	105780000	105790000	chr10	105960000	105970000		chr10	104500000	104510000	chr10	104590000	104600000		chr10	45740000	45750000	chr10	46090000	46100000
	chr10	69610000	69620000	chr10	70070000	70080000		chr10	8930000	8940000	chr10	9100000	9110000		chr10	54640000	54650000	chr10	55070000	55080000		chr10	81130000	81140000	chr10	81240000	81250000		chr10	105780000	105790000	chr10	105880000	105890000		chr10	104490000	104500000	chr10	104810000	104820000		chr10	45730000	45740000	chr10	46130000	46140000
	chr10	52170000	52180000	chr10	52360000	52370000		chr10	8920000	8930000	chr10	9010000	9020000		chr10	54640000	54650000	chr10	56150000	56160000		chr10	81120000	81130000	chr10	81680000	81690000		chr10	9110000	9120000	chr10	9340000	9350000		chr10	21470000	21480000	chr10	21800000	21810000		chr10	45740000	45750000	chr10	45960000	45970000
	chr10	6980000	6990000	chr10	7450000	7460000		chr10	8920000	8930000	chr10	9250000	9260000		chr10	54640000	54650000	chr10	55890000	55900000		chr10	28080000	28090000	chr10	28670000	28680000		chr10	120790000	120800000	chr10	120910000	120920000		chr10	21460000	21470000	chr10	21550000	21560000		chr10	4590000	4600000	chr10	4670000	4680000
	chr10	6950000	6960000	chr10	7100000	7110000		chr10	8920000	8930000	chr10	9340000	9350000		chr10	54640000	54650000	chr10	55740000	55750000		chr10	28040000	28050000	chr10	28460000	28470000		chr10	120790000	120800000	chr10	121340000	121350000		chr10	79800000	79810000	chr10	80950000	80960000		chr10	4540000	4550000	chr10	4690000	4700000
	chr10	6960000	6970000	chr10	7270000	7280000		chr10	5160000	5170000	chr10	5410000	5420000		chr10	54640000	54650000	chr10	55600000	55610000		chr10	28050000	28060000	chr10	28530000	28540000		chr10	72660000	72670000	chr10	73020000	73030000		chr10	69650000	69660000	chr10	70090000	70100000		chr10	4550000	4560000	chr10	4810000	4820000
	chr10	100220000	100230000	chr10	100410000	100420000		chr10	5150000	5160000	chr10	5230000	5240000		chr10	130060000	130070000	chr10	130320000	130330000		chr10	27960000	27970000	chr10	28520000	28530000		chr10	72690000	72700000	chr10	72960000	72970000		chr10	69610000	69620000	chr10	69910000	69920000		chr10	4610000	4620000	chr10	4800000	4810000
	chr10	100210000	100220000	chr10	101130000	101140000		chr10	5140000	5150000	chr10	5320000	5330000		chr10	130060000	130070000	chr10	130650000	130660000		chr10	25630000	25640000	chr10	25980000	25990000		chr10	88450000	88460000	chr10	88650000	88660000		chr10	35150000	35160000	chr10	35230000	35240000		chr10	92770000	92780000	chr10	93010000	93020000
	chr10	100220000	100230000	chr10	101000000	101010000		chr10	128200000	128210000	chr10	128280000	128290000		chr10	50810000	50820000	chr10	50970000	50980000		chr10	25620000	25630000	chr10	25930000	25940000		chr10	119180000	119190000	chr10	120010000	120020000		chr10	28540000	28550000	chr10	28670000	28680000		chr10	29660000	29670000	chr10	29740000	29750000
	chr10	100230000	100240000	chr10	100520000	100530000		chr10	128300000	128310000	chr10	128430000	128440000		chr10	50800000	50810000	chr10	51800000	51810000		chr10	76490000	76500000	chr10	76750000	76760000		chr10	35630000	35640000	chr10	35840000	35850000		chr10	22020000	22030000	chr10	22220000	22230000		chr10	89410000	89420000	chr10	89490000	89500000
	chr10	72680000	72690000	chr10	72810000	72820000		chr10	72520000	72530000	chr10	72640000	72650000		chr10	52010000	52020000	chr10	52420000	52430000		chr10	76400000	76410000	chr10	76770000	76780000		chr10	80710000	80720000	chr10	80920000	80930000		chr10	62580000	62590000	chr10	63020000	63030000		chr10	103650000	103660000	chr10	103760000	103770000
	chr10	72690000	72700000	chr10	72960000	72970000		chr10	72550000	72560000	chr10	73040000	73050000		chr10	52040000	52050000	chr10	52300000	52310000		chr10	76490000	76500000	chr10	76850000	76860000		chr10	80730000	80740000	chr10	80820000	80830000		chr10	62570000	62580000	chr10	62890000	62900000		chr10	103600000	103610000	chr10	103830000	103840000
	chr10	72670000	72680000	chr10	73400000	73410000		chr10	17650000	17660000	chr10	17770000	17780000		chr10	52080000	52090000	chr10	52170000	52180000		chr10	76390000	76400000	chr10	76850000	76860000		chr10	126330000	126340000	chr10	126420000	126430000		chr10	62580000	62590000	chr10	62710000	62720000		chr10	28540000	28550000	chr10	28670000	28680000
	chr10	61850000	61860000	chr10	62380000	62390000		chr10	17650000	17660000	chr10	18510000	18520000		chr10	50490000	50500000	chr10	50720000	50730000		chr10	12780000	12790000	chr10	13110000	13120000		chr10	122180000	122190000	chr10	122490000	122500000		chr10	94870000	94880000	chr10	95040000	95050000		chr10	105260000	105270000	chr10	105340000	105350000
	chr10	61960000	61970000	chr10	62540000	62550000		chr10	17640000	17650000	chr10	18380000	18390000		chr10	95580000	95590000	chr10	96200000	96210000		chr10	130060000	130070000	chr10	130640000	130650000		chr10	63790000	63800000	chr10	64140000	64150000		chr10	94860000	94870000	chr10	94950000	94960000		chr10	105250000	105260000	chr10	105430000	105440000
	chr10	61860000	61870000	chr10	61960000	61970000		chr10	7160000	7170000	chr10	7280000	7290000		chr10	95590000	95600000	chr10	95810000	95820000		chr10	134960000	134970000	chr10	135110000	135120000		chr10	63800000	63810000	chr10	64170000	64180000		chr10	94820000	94830000	chr10	95230000	95240000		chr10	60540000	60550000	chr10	61370000	61380000
	chr10	61860000	61870000	chr10	62190000	62200000		chr10	7300000	7310000	chr10	7450000	7460000		chr10	95580000	95590000	chr10	96300000	96310000		chr10	134960000	134970000	chr10	135040000	135050000		chr10	63640000	63650000	chr10	64150000	64160000		chr10	94830000	94840000	chr10	95110000	95120000		chr10	60530000	60540000	chr10	61000000	61010000
	chr10	78070000	78080000	chr10	78750000	78760000		chr10	7160000	7170000	chr10	7460000	7470000		chr10	95580000	95590000	chr10	95980000	95990000		chr10	11650000	11660000	chr10	11760000	11770000		chr10	63790000	63800000	chr10	64000000	64010000		chr10	116230000	116240000	chr10	116540000	116550000		chr10	121060000	121070000	chr10	121160000	121170000
	chr10	78120000	78130000	chr10	78290000	78300000		chr10	7160000	7170000	chr10	7520000	7530000		chr10	95580000	95590000	chr10	96070000	96080000		chr10	92760000	92770000	chr10	93010000	93020000		chr10	63660000	63670000	chr10	63930000	63940000		chr10	116220000	116230000	chr10	116450000	116460000		chr10	95670000	95680000	chr10	95820000	95830000
	chr10	78070000	78080000	chr10	78830000	78840000		chr10	28720000	28730000	chr10	28810000	28820000		chr10	4890000	4900000	chr10	5320000	5330000		chr10	90450000	90460000	chr10	90540000	90550000		chr10	63660000	63670000	chr10	63740000	63750000		chr10	116230000	116240000	chr10	116380000	116390000		chr10	95660000	95670000	chr10	96190000	96200000
	chr10	3400000	3410000	chr10	3940000	3950000		chr10	28720000	28730000	chr10	28860000	28870000		chr10	4890000	4900000	chr10	5420000	5430000		chr10	4470000	4480000	chr10	4810000	4820000		chr10	71730000	71740000	chr10	72130000	72140000		chr10	77160000	77170000	chr10	77440000	77450000		chr10	95710000	95720000	chr10	96210000	96220000
	chr10	3410000	3420000	chr10	3490000	3500000		chr10	121360000	121370000	chr10	121500000	121510000		chr10	4890000	4900000	chr10	5020000	5030000		chr10	114880000	114890000	chr10	115150000	115160000		chr10	119250000	119260000	chr10	120300000	120310000		chr10	77180000	77190000	chr10	77530000	77540000		chr10	95670000	95680000	chr10	96070000	96080000
	chr10	117550000	117560000	chr10	118130000	118140000		chr10	121360000	121370000	chr10	121610000	121620000		chr10	4900000	4910000	chr10	5130000	5140000		chr10	49570000	49580000	chr10	49710000	49720000		chr10	119250000	119260000	chr10	120000000	120010000		chr10	50180000	50190000	chr10	50710000	50720000		chr10	56850000	56860000	chr10	57020000	57030000
	chr10	117560000	117570000	chr10	118030000	118040000		chr10	122360000	122370000	chr10	122590000	122600000		chr10	4880000	4890000	chr10	5660000	5670000		chr10	49560000	49570000	chr10	49850000	49860000		chr10	119300000	119310000	chr10	119800000	119810000		chr10	64930000	64940000	chr10	65470000	65480000		chr10	38140000	38150000	chr10	38380000	38390000
	chr10	17330000	17340000	chr10	17470000	17480000		chr10	122350000	122360000	chr10	122490000	122500000		chr10	4860000	4870000	chr10	5750000	5760000		chr10	63640000	63650000	chr10	64000000	64010000		chr10	119300000	119310000	chr10	119870000	119880000		chr10	64970000	64980000	chr10	65470000	65480000		chr10	80530000	80540000	chr10	80940000	80950000
	chr10	17330000	17340000	chr10	17630000	17640000		chr10	44160000	44170000	chr10	44880000	44890000		chr10	55360000	55370000	chr10	56160000	56170000		chr10	63660000	63670000	chr10	63790000	63800000		chr10	119280000	119290000	chr10	120210000	120220000		chr10	64960000	64970000	chr10	65270000	65280000		chr10	95460000	95470000	chr10	95570000	95580000
	chr10	75640000	75650000	chr10	75860000	75870000		chr10	44160000	44170000	chr10	45380000	45390000		chr10	55360000	55370000	chr10	55890000	55900000		chr10	9260000	9270000	chr10	9340000	9350000		chr10	94840000	94850000	chr10	95040000	95050000		chr10	64990000	65000000	chr10	65270000	65280000		chr10	84560000	84570000	chr10	85620000	85630000
	chr10	75620000	75630000	chr10	75970000	75980000		chr10	44180000	44190000	chr10	44520000	44530000		chr10	55360000	55370000	chr10	55740000	55750000		chr10	8090000	8100000	chr10	8800000	8810000		chr10	94830000	94840000	chr10	95250000	95260000		chr10	65020000	65030000	chr10	65390000	65400000		chr10	73810000	73820000	chr10	73970000	73980000
	chr10	75710000	75720000	chr10	75990000	76000000		chr10	44190000	44200000	chr10	44370000	44380000		chr10	55360000	55370000	chr10	55590000	55600000		chr10	8110000	8120000	chr10	8810000	8820000		chr10	50190000	50200000	chr10	50370000	50380000		chr10	64950000	64960000	chr10	65370000	65380000		chr10	73800000	73810000	chr10	74090000	74100000
	chr10	74200000	74210000	chr10	74310000	74320000		chr10	44160000	44170000	chr10	45070000	45080000		chr10	55370000	55380000	chr10	55530000	55540000		chr10	8090000	8100000	chr10	8400000	8410000		chr10	50180000	50190000	chr10	50720000	50730000		chr10	65020000	65030000	chr10	65220000	65230000		chr10	112830000	112840000	chr10	113900000	113910000
	chr10	37400000	37410000	chr10	37770000	37780000		chr10	44180000	44190000	chr10	44270000	44280000		chr10	55360000	55370000	chr10	55660000	55670000		chr10	8120000	8130000	chr10	8230000	8240000		chr10	50190000	50200000	chr10	50610000	50620000		chr10	64960000	64970000	chr10	65220000	65230000		chr10	112830000	112840000	chr10	113350000	113360000
	chr10	37410000	37420000	chr10	37530000	37540000		chr10	50810000	50820000	chr10	50970000	50980000		chr10	34100000	34110000	chr10	34300000	34310000		chr10	8090000	8100000	chr10	8910000	8920000		chr10	77680000	77690000	chr10	77770000	77780000		chr10	64390000	64400000	chr10	64570000	64580000		chr10	35920000	35930000	chr10	37060000	37070000
	chr10	89410000	89420000	chr10	89490000	89500000		chr10	50800000	50810000	chr10	51020000	51030000		chr10	22510000	22520000	chr10	22600000	22610000		chr10	8090000	8100000	chr10	9250000	9260000		chr10	77660000	77670000	chr10	78050000	78060000		chr10	63800000	63810000	chr10	64000000	64010000		chr10	35920000	35930000	chr10	37160000	37170000
	chr10	91180000	91190000	chr10	91460000	91470000		chr10	118550000	118560000	chr10	118930000	118940000		chr10	22540000	22550000	chr10	22710000	22720000		chr10	8090000	8100000	chr10	8630000	8640000		chr10	35280000	35290000	chr10	35500000	35510000		chr10	63850000	63860000	chr10	63930000	63940000		chr10	70310000	70320000	chr10	70490000	70500000
	chr10	91180000	91190000	chr10	91390000	91400000		chr10	118580000	118590000	chr10	118690000	118700000		chr10	22540000	22550000	chr10	23270000	23280000		chr10	111900000	111910000	chr10	112320000	112330000		chr10	7560000	7570000	chr10	9340000	9350000		chr10	63800000	63810000	chr10	63940000	63950000		chr10	70290000	70300000	chr10	70650000	70660000
	chr10	91220000	91230000	chr10	91310000	91320000		chr10	118590000	118600000	chr10	118710000	118720000		chr10	117460000	117470000	chr10	118140000	118150000		chr10	111890000	111900000	chr10	112030000	112040000		chr10	7560000	7570000	chr10	7890000	7900000		chr10	64200000	64210000	chr10	64900000	64910000		chr10	93840000	93850000	chr10	94190000	94200000
	chr10	103250000	103260000	chr10	103540000	103550000		chr10	118560000	118570000	chr10	119070000	119080000		chr10	117460000	117470000	chr10	118040000	118050000		chr10	116310000	116320000	chr10	116540000	116550000		chr10	7570000	7580000	chr10	7720000	7730000		chr10	26620000	26630000	chr10	26830000	26840000		chr10	93840000	93850000	chr10	94040000	94050000
	chr10	103220000	103230000	chr10	103310000	103320000		chr10	118580000	118590000	chr10	118830000	118840000		chr10	107710000	107720000	chr10	107930000	107940000		chr10	116320000	116330000	chr10	116890000	116900000		chr10	21360000	21370000	chr10	21790000	21800000		chr10	5720000	5730000	chr10	5800000	5810000		chr10	79000000	79010000	chr10	79400000	79410000
	chr10	85810000	85820000	chr10	85960000	85970000		chr10	118380000	118390000	chr10	118930000	118940000		chr10	107700000	107710000	chr10	108440000	108450000		chr10	116310000	116320000	chr10	116450000	116460000		chr10	21360000	21370000	chr10	21550000	21560000		chr10	5720000	5730000	chr10	5920000	5930000		chr10	38380000	38390000	chr10	38640000	38650000
	chr10	85800000	85810000	chr10	85880000	85890000		chr10	118380000	118390000	chr10	118690000	118700000		chr10	73450000	73460000	chr10	73650000	73660000		chr10	116330000	116340000	chr10	116650000	116660000		chr10	21350000	21360000	chr10	22240000	22250000		chr10	94750000	94760000	chr10	95100000	95110000		chr10	92920000	92930000	chr10	93000000	93010000
	chr10	103990000	104000000	chr10	104240000	104250000		chr10	118390000	118400000	chr10	118760000	118770000		chr10	73470000	73480000	chr10	73570000	73580000		chr10	104670000	104680000	chr10	104820000	104830000		chr10	21350000	21360000	chr10	22020000	22030000		chr10	90450000	90460000	chr10	90560000	90570000		chr10	93310000	93320000	chr10	93450000	93460000
	chr10	103930000	103940000	chr10	104220000	104230000		chr10	118450000	118460000	chr10	118540000	118550000		chr10	15470000	15480000	chr10	15580000	15590000		chr10	104680000	104690000	chr10	105010000	105020000		chr10	33620000	33630000	chr10	34600000	34610000		chr10	134200000	134210000	chr10	134460000	134470000		chr10	93310000	93320000	chr10	93390000	93400000
	chr10	103990000	104000000	chr10	104340000	104350000		chr10	52770000	52780000	chr10	53970000	53980000		chr10	15470000	15480000	chr10	15860000	15870000		chr10	104680000	104690000	chr10	105090000	105100000		chr10	33610000	33620000	chr10	34920000	34930000		chr10	134190000	134200000	chr10	134360000	134370000		chr10	86020000	86030000	chr10	86290000	86300000
	chr10	103980000	103990000	chr10	104110000	104120000		chr10	52830000	52840000	chr10	53960000	53970000		chr10	15490000	15500000	chr10	15670000	15680000		chr10	78920000	78930000	chr10	79150000	79160000		chr10	33630000	33640000	chr10	33900000	33910000		chr10	74450000	74460000	chr10	74570000	74580000		chr10	31060000	31070000	chr10	31750000	31760000
	chr10	103920000	103930000	chr10	104160000	104170000		chr10	52820000	52830000	chr10	53760000	53770000		chr10	15470000	15480000	chr10	15760000	15770000		chr10	78930000	78940000	chr10	79480000	79490000		chr10	33620000	33630000	chr10	33950000	33960000		chr10	75650000	75660000	chr10	75840000	75850000		chr10	31000000	31010000	chr10	32090000	32100000
	chr10	126220000	126230000	chr10	126500000	126510000		chr10	52760000	52770000	chr10	53760000	53770000		chr10	15470000	15480000	chr10	16820000	16830000		chr10	78930000	78940000	chr10	79400000	79410000		chr10	59470000	59480000	chr10	59820000	59830000		chr10	75640000	75650000	chr10	75960000	75970000		chr10	31070000	31080000	chr10	31590000	31600000
	chr10	126230000	126240000	chr10	126420000	126430000		chr10	52840000	52850000	chr10	53130000	53140000		chr10	57040000	57050000	chr10	57490000	57500000		chr10	78930000	78940000	chr10	79240000	79250000		chr10	59470000	59480000	chr10	59910000	59920000		chr10	118440000	118450000	chr10	118930000	118940000		chr10	31000000	31010000	chr10	31610000	31620000
	chr10	126210000	126220000	chr10	126630000	126640000		chr10	4700000	4710000	chr10	4800000	4810000		chr10	57050000	57060000	chr10	57870000	57880000		chr10	21360000	21370000	chr10	21780000	21790000		chr10	82720000	82730000	chr10	82920000	82930000		chr10	118440000	118450000	chr10	118540000	118550000		chr10	31040000	31050000	chr10	31980000	31990000
	chr10	30150000	30160000	chr10	30280000	30290000		chr10	59210000	59220000	chr10	59820000	59830000		chr10	57040000	57050000	chr10	57250000	57260000		chr10	21360000	21370000	chr10	21550000	21560000		chr10	62200000	62210000	chr10	62400000	62410000		chr10	71270000	71280000	chr10	71390000	71400000		chr10	31070000	31080000	chr10	31320000	31330000
	chr10	62200000	62210000	chr10	62400000	62410000		chr10	59230000	59240000	chr10	59320000	59330000		chr10	116070000	116080000	chr10	116380000	116390000		chr10	21360000	21370000	chr10	22250000	22260000		chr10	62200000	62210000	chr10	62520000	62530000		chr10	120580000	120590000	chr10	120780000	120790000		chr10	12530000	12540000	chr10	12680000	12690000
	chr10	62200000	62210000	chr10	62540000	62550000		chr10	59220000	59230000	chr10	59410000	59420000		chr10	116060000	116070000	chr10	116190000	116200000		chr10	21360000	21370000	chr10	21630000	21640000		chr10	60290000	60300000	chr10	60390000	60400000		chr10	98150000	98160000	chr10	98580000	98590000		chr10	12480000	12490000	chr10	12740000	12750000
	chr10	77810000	77820000	chr10	78300000	78310000		chr10	59230000	59240000	chr10	59610000	59620000		chr10	116070000	116080000	chr10	116530000	116540000		chr10	95460000	95470000	chr10	95570000	95580000		chr10	60290000	60300000	chr10	60970000	60980000		chr10	98160000	98170000	chr10	98240000	98250000		chr10	12530000	12540000	chr10	12750000	12760000
	chr10	77830000	77840000	chr10	78050000	78060000		chr10	104670000	104680000	chr10	105090000	105100000		chr10	71180000	71190000	chr10	71260000	71270000		chr10	95450000	95460000	chr10	95640000	95650000		chr10	60280000	60290000	chr10	60690000	60700000		chr10	62330000	62340000	chr10	62530000	62540000		chr10	15620000	15630000	chr10	15750000	15760000
	chr10	102340000	102350000	chr10	102620000	102630000		chr10	104670000	104680000	chr10	105000000	105010000		chr10	71170000	71180000	chr10	71460000	71470000		chr10	74610000	74620000	chr10	74820000	74830000		chr10	60290000	60300000	chr10	60520000	60530000		chr10	62330000	62340000	chr10	62410000	62420000		chr10	15630000	15640000	chr10	15860000	15870000
	chr10	102310000	102320000	chr10	102490000	102500000		chr10	104670000	104680000	chr10	104820000	104830000		chr10	71160000	71170000	chr10	71390000	71400000		chr10	4590000	4600000	chr10	4690000	4700000		chr10	60290000	60300000	chr10	61370000	61380000		chr10	91190000	91200000	chr10	91310000	91320000		chr10	126860000	126870000	chr10	127390000	127400000
	chr10	120070000	120080000	chr10	120570000	120580000		chr10	134460000	134470000	chr10	134700000	134710000		chr10	24700000	24710000	chr10	24790000	24800000		chr10	4550000	4560000	chr10	4800000	4810000		chr10	95290000	95300000	chr10	95580000	95590000		chr10	33300000	33310000	chr10	33440000	33450000		chr10	76020000	76030000	chr10	76850000	76860000
	chr10	120080000	120090000	chr10	120170000	120180000		chr10	64190000	64200000	chr10	64280000	64290000		chr10	125210000	125220000	chr10	125310000	125320000		chr10	76870000	76880000	chr10	76990000	77000000		chr10	95300000	95310000	chr10	95440000	95450000		chr10	33310000	33320000	chr10	33400000	33410000		chr10	76000000	76010000	chr10	76990000	77000000
	chr10	120040000	120050000	chr10	120210000	120220000		chr10	64250000	64260000	chr10	64910000	64920000		chr10	125180000	125190000	chr10	125700000	125710000		chr10	61000000	61010000	chr10	61360000	61370000		chr10	112500000	112510000	chr10	112760000	112770000		chr10	75020000	75030000	chr10	75240000	75250000		chr10	76030000	76040000	chr10	76650000	76660000
	chr10	120110000	120120000	chr10	120290000	120300000		chr10	64200000	64210000	chr10	64830000	64840000		chr10	18230000	18240000	chr10	18470000	18480000		chr10	106420000	106430000	chr10	106680000	106690000		chr10	112560000	112570000	chr10	112650000	112660000		chr10	75020000	75030000	chr10	75400000	75410000		chr10	76020000	76030000	chr10	76570000	76580000
	chr10	120050000	120060000	chr10	120300000	120310000		chr10	64170000	64180000	chr10	64570000	64580000		chr10	18230000	18240000	chr10	18580000	18590000		chr10	34660000	34670000	chr10	34910000	34920000		chr10	112480000	112490000	chr10	112860000	112870000		chr10	30700000	30710000	chr10	30810000	30820000		chr10	76020000	76030000	chr10	76780000	76790000
	chr10	27180000	27190000	chr10	27400000	27410000		chr10	64250000	64260000	chr10	64340000	64350000		chr10	18220000	18230000	chr10	18380000	18390000		chr10	133840000	133850000	chr10	133930000	133940000		chr10	114460000	114470000	chr10	115280000	115290000		chr10	21180000	21190000	chr10	21330000	21340000		chr10	76010000	76020000	chr10	76480000	76490000
	chr10	27170000	27180000	chr10	27650000	27660000		chr10	64200000	64210000	chr10	64330000	64340000		chr10	76020000	76030000	chr10	76340000	76350000		chr10	89410000	89420000	chr10	89490000	89500000		chr10	114500000	114510000	chr10	114710000	114720000		chr10	21180000	21190000	chr10	21260000	21270000		chr10	21360000	21370000	chr10	21550000	21560000
	chr10	28540000	28550000	chr10	28670000	28680000		chr10	75640000	75650000	chr10	75750000	75760000		chr10	76030000	76040000	chr10	76290000	76300000		chr10	73060000	73070000	chr10	73650000	73660000		chr10	114490000	114500000	chr10	114570000	114580000		chr10	21170000	21180000	chr10	21480000	21490000		chr10	21460000	21470000	chr10	21550000	21560000
	chr10	27730000	27740000	chr10	27940000	27950000		chr10	75640000	75650000	chr10	75840000	75850000		chr10	76000000	76010000	chr10	76580000	76590000		chr10	73070000	73080000	chr10	73560000	73570000		chr10	114460000	114470000	chr10	115140000	115150000		chr10	21140000	21150000	chr10	21530000	21540000		chr10	89900000	89910000	chr10	90320000	90330000
	chr10	4120000	4130000	chr10	4700000	4710000		chr10	75620000	75630000	chr10	75700000	75710000		chr10	76020000	76030000	chr10	76110000	76120000		chr10	73060000	73070000	chr10	73140000	73150000		chr10	114470000	114480000	chr10	114800000	114810000		chr10	105350000	105360000	chr10	105430000	105440000		chr10	89910000	89920000	chr10	90140000	90150000
	chr10	4090000	4100000	chr10	4810000	4820000		chr10	75640000	75650000	chr10	75990000	76000000		chr10	76000000	76010000	chr10	76850000	76860000		chr10	73070000	73080000	chr10	73330000	73340000		chr10	114480000	114490000	chr10	114880000	114890000		chr10	22280000	22290000	chr10	23000000	23010000		chr10	111770000	111780000	chr10	111860000	111870000
	chr10	7180000	7190000	chr10	7440000	7450000		chr10	79150000	79160000	chr10	79250000	79260000		chr10	2200000	2210000	chr10	2320000	2330000		chr10	73140000	73150000	chr10	73340000	73350000		chr10	114480000	114490000	chr10	115230000	115240000		chr10	22290000	22300000	chr10	22790000	22800000		chr10	111720000	111730000	chr10	111870000	111880000
	chr10	7920000	7930000	chr10	8370000	8380000		chr10	79140000	79150000	chr10	79400000	79410000		chr10	2170000	2180000	chr10	3070000	3080000		chr10	73130000	73140000	chr10	73450000	73460000		chr10	73140000	73150000	chr10	73800000	73810000		chr10	22290000	22300000	chr10	22880000	22890000		chr10	111760000	111770000	chr10	112040000	112050000
	chr10	7910000	7920000	chr10	9250000	9260000		chr10	79160000	79170000	chr10	79500000	79510000		chr10	2170000	2180000	chr10	2950000	2960000		chr10	35920000	35930000	chr10	37060000	37070000		chr10	73150000	73160000	chr10	73320000	73330000		chr10	22290000	22300000	chr10	22530000	22540000		chr10	120950000	120960000	chr10	121300000	121310000
	chr10	7910000	7920000	chr10	8910000	8920000		chr10	79140000	79150000	chr10	79460000	79470000		chr10	19700000	19710000	chr10	20070000	20080000		chr10	9370000	9380000	chr10	11310000	11320000		chr10	73130000	73140000	chr10	73460000	73470000		chr10	22280000	22290000	chr10	22460000	22470000		chr10	120970000	120980000	chr10	121050000	121060000
	chr10	7920000	7930000	chr10	8070000	8080000		chr10	1180000	1190000	chr10	1410000	1420000		chr10	19710000	19720000	chr10	21130000	21140000		chr10	9380000	9390000	chr10	11080000	11090000		chr10	73130000	73140000	chr10	73590000	73600000		chr10	22290000	22300000	chr10	22710000	22720000		chr10	120970000	120980000	chr10	121140000	121150000
	chr10	7970000	7980000	chr10	8070000	8080000		chr10	121670000	121680000	chr10	122630000	122640000		chr10	101190000	101200000	chr10	101310000	101320000		chr10	103240000	103250000	chr10	103330000	103340000		chr10	73140000	73150000	chr10	73650000	73660000		chr10	22280000	22290000	chr10	23270000	23280000		chr10	120960000	120970000	chr10	121170000	121180000
	chr10	7910000	7920000	chr10	9340000	9350000		chr10	121720000	121730000	chr10	121860000	121870000		chr10	101140000	101150000	chr10	101300000	101310000		chr10	75600000	75610000	chr10	75700000	75710000		chr10	89410000	89420000	chr10	89600000	89610000		chr10	22290000	22300000	chr10	23340000	23350000		chr10	77170000	77180000	chr10	77270000	77280000
	chr10	74450000	74460000	chr10	74560000	74570000		chr10	121690000	121700000	chr10	121960000	121970000		chr10	101190000	101200000	chr10	101460000	101470000		chr10	75640000	75650000	chr10	75730000	75740000		chr10	89410000	89420000	chr10	89490000	89500000		chr10	22280000	22290000	chr10	22600000	22610000		chr10	77150000	77160000	chr10	78300000	78310000
	chr10	121440000	121450000	chr10	121610000	121620000		chr10	121690000	121700000	chr10	122090000	122100000		chr10	101190000	101200000	chr10	101370000	101380000		chr10	75640000	75650000	chr10	75970000	75980000		chr10	7150000	7160000	chr10	7430000	7440000		chr10	65240000	65250000	chr10	65460000	65470000		chr10	77150000	77160000	chr10	77790000	77800000
	chr10	10940000	10950000	chr10	11320000	11330000		chr10	17500000	17510000	chr10	17760000	17770000		chr10	110750000	110760000	chr10	111600000	111610000		chr10	75640000	75650000	chr10	75830000	75840000		chr10	36410000	36420000	chr10	37090000	37100000		chr10	65190000	65200000	chr10	65460000	65470000		chr10	77160000	77170000	chr10	77660000	77670000
	chr10	21460000	21470000	chr10	21540000	21550000		chr10	17550000	17560000	chr10	17760000	17770000		chr10	68080000	68090000	chr10	68390000	68400000		chr10	105180000	105190000	chr10	105420000	105430000		chr10	121440000	121450000	chr10	121620000	121630000		chr10	65280000	65290000	chr10	65380000	65390000		chr10	77160000	77170000	chr10	78060000	78070000
	chr10	21360000	21370000	chr10	21550000	21560000		chr10	17470000	17480000	chr10	17630000	17640000		chr10	68060000	68070000	chr10	68680000	68690000		chr10	105250000	105260000	chr10	105330000	105340000		chr10	6710000	6720000	chr10	7450000	7460000		chr10	65220000	65230000	chr10	65370000	65380000		chr10	77160000	77170000	chr10	77420000	77430000
	chr10	21360000	21370000	chr10	21770000	21780000		chr10	8170000	8180000	chr10	8380000	8390000		chr10	57590000	57600000	chr10	58110000	58120000		chr10	105160000	105170000	chr10	105240000	105250000		chr10	7930000	7940000	chr10	8020000	8030000		chr10	102100000	102110000	chr10	102190000	102200000		chr10	116230000	116240000	chr10	116540000	116550000
	chr10	21370000	21380000	chr10	21450000	21460000		chr10	8210000	8220000	chr10	8500000	8510000		chr10	87540000	87550000	chr10	88130000	88140000		chr10	105120000	105130000	chr10	105230000	105240000		chr10	7910000	7920000	chr10	9260000	9270000		chr10	102090000	102100000	chr10	102270000	102280000		chr10	116220000	116230000	chr10	116470000	116480000
	chr10	21370000	21380000	chr10	21670000	21680000		chr10	37530000	37540000	chr10	37610000	37620000		chr10	69450000	69460000	chr10	69530000	69540000		chr10	80610000	80620000	chr10	80950000	80960000		chr10	7910000	7920000	chr10	9340000	9350000		chr10	102330000	102340000	chr10	102490000	102500000		chr10	116230000	116240000	chr10	116310000	116320000
	chr10	6340000	6350000	chr10	6430000	6440000		chr10	37530000	37540000	chr10	37790000	37800000		chr10	69450000	69460000	chr10	69610000	69620000		chr10	60540000	60550000	chr10	60970000	60980000		chr10	7910000	7920000	chr10	8910000	8920000		chr10	102320000	102330000	chr10	102630000	102640000		chr10	72680000	72690000	chr10	73040000	73050000
	chr10	95670000	95680000	chr10	95760000	95770000		chr10	60710000	60720000	chr10	61340000	61350000		chr10	16150000	16160000	chr10	16580000	16590000		chr10	60520000	60530000	chr10	60950000	60960000		chr10	7900000	7910000	chr10	8870000	8880000		chr10	82200000	82210000	chr10	82290000	82300000		chr10	72680000	72690000	chr10	72960000	72970000
	chr10	95690000	95700000	chr10	95840000	95850000		chr10	60710000	60720000	chr10	61570000	61580000		chr10	16080000	16090000	chr10	16570000	16580000		chr10	61470000	61480000	chr10	61810000	61820000		chr10	7910000	7920000	chr10	8080000	8090000		chr10	82130000	82140000	chr10	82420000	82430000		chr10	112500000	112510000	chr10	112650000	112660000
	chr10	95670000	95680000	chr10	96090000	96100000		chr10	60720000	60730000	chr10	61180000	61190000		chr10	16150000	16160000	chr10	16810000	16820000		chr10	14640000	14650000	chr10	14860000	14870000		chr10	33240000	33250000	chr10	33420000	33430000		chr10	111650000	111660000	chr10	112040000	112050000		chr10	100220000	100230000	chr10	100420000	100430000
	chr10	95670000	95680000	chr10	96020000	96030000		chr10	60710000	60720000	chr10	60990000	61000000		chr10	70760000	70770000	chr10	70850000	70860000		chr10	14630000	14640000	chr10	14920000	14930000		chr10	33200000	33210000	chr10	33290000	33300000		chr10	111640000	111650000	chr10	111860000	111870000		chr10	100250000	100260000	chr10	100430000	100440000
	chr10	95650000	95660000	chr10	96190000	96200000		chr10	111770000	111780000	chr10	112030000	112040000		chr10	70770000	70780000	chr10	71360000	71370000		chr10	14620000	14630000	chr10	15000000	15010000		chr10	22840000	22850000	chr10	23360000	23370000		chr10	73150000	73160000	chr10	73360000	73370000		chr10	100220000	100230000	chr10	101000000	101010000
	chr10	54240000	54250000	chr10	54320000	54330000		chr10	111770000	111780000	chr10	111880000	111890000		chr10	70770000	70780000	chr10	71150000	71160000		chr10	14540000	14550000	chr10	15140000	15150000		chr10	22840000	22850000	chr10	23120000	23130000		chr10	73150000	73160000	chr10	73570000	73580000		chr10	27010000	27020000	chr10	27160000	27170000
	chr10	54250000	54260000	chr10	54460000	54470000		chr10	34810000	34820000	chr10	35270000	35280000		chr10	70770000	70780000	chr10	71050000	71060000		chr10	14600000	14610000	chr10	15140000	15150000		chr10	22900000	22910000	chr10	22980000	22990000		chr10	73150000	73160000	chr10	73450000	73460000		chr10	4890000	4900000	chr10	5020000	5030000
	chr10	54400000	54410000	chr10	54480000	54490000		chr10	34810000	34820000	chr10	34920000	34930000		chr10	108160000	108170000	chr10	108430000	108440000		chr10	13240000	13250000	chr10	13340000	13350000		chr10	22840000	22850000	chr10	23270000	23280000		chr10	73140000	73150000	chr10	73640000	73650000		chr10	4870000	4880000	chr10	5660000	5670000
	chr10	4160000	4170000	chr10	4800000	4810000		chr10	122920000	122930000	chr10	123080000	123090000		chr10	108160000	108170000	chr10	108320000	108330000		chr10	13190000	13200000	chr10	13630000	13640000		chr10	8740000	8750000	chr10	9250000	9260000		chr10	118550000	118560000	chr10	118920000	118930000		chr10	4850000	4860000	chr10	5470000	5480000
	chr10	71070000	71080000	chr10	71150000	71160000		chr10	122920000	122930000	chr10	123360000	123370000		chr10	113510000	113520000	chr10	113880000	113890000		chr10	73240000	73250000	chr10	73550000	73560000		chr10	37190000	37200000	chr10	37540000	37550000		chr10	81130000	81140000	chr10	81220000	81230000		chr10	4890000	4900000	chr10	4970000	4980000
	chr10	71060000	71070000	chr10	71380000	71390000		chr10	122940000	122950000	chr10	123640000	123650000		chr10	113510000	113520000	chr10	114070000	114080000		chr10	73230000	73240000	chr10	73470000	73480000		chr10	37180000	37190000	chr10	38030000	38040000		chr10	43360000	43370000	chr10	43580000	43590000		chr10	4890000	4900000	chr10	5130000	5140000
	chr10	127130000	127140000	chr10	127400000	127410000		chr10	122930000	122940000	chr10	123490000	123500000		chr10	37200000	37210000	chr10	37690000	37700000		chr10	91190000	91200000	chr10	91460000	91470000		chr10	37180000	37190000	chr10	37780000	37790000		chr10	71900000	71910000	chr10	72110000	72120000		chr10	4890000	4900000	chr10	5320000	5330000
	chr10	73660000	73670000	chr10	73970000	73980000		chr10	122950000	122960000	chr10	123170000	123180000		chr10	37190000	37200000	chr10	37780000	37790000		chr10	91190000	91200000	chr10	91320000	91330000		chr10	37180000	37190000	chr10	37420000	37430000		chr10	22380000	22390000	chr10	22460000	22470000		chr10	115900000	115910000	chr10	116210000	116220000
	chr10	73640000	73650000	chr10	74090000	74100000		chr10	5680000	5690000	chr10	5780000	5790000		chr10	37180000	37190000	chr10	38040000	38050000		chr10	14920000	14930000	chr10	15000000	15010000		chr10	93760000	93770000	chr10	94190000	94200000		chr10	22390000	22400000	chr10	22710000	22720000		chr10	34810000	34820000	chr10	34910000	34920000
	chr10	73670000	73680000	chr10	73750000	73760000		chr10	5730000	5740000	chr10	5910000	5920000		chr10	37180000	37190000	chr10	37550000	37560000		chr10	14940000	14950000	chr10	15140000	15150000		chr10	49650000	49660000	chr10	49730000	49740000		chr10	22390000	22400000	chr10	22600000	22610000		chr10	75890000	75900000	chr10	76860000	76870000
	chr10	58620000	58630000	chr10	59080000	59090000		chr10	5680000	5690000	chr10	6120000	6130000		chr10	112380000	112390000	chr10	113090000	113100000		chr10	112370000	112380000	chr10	112450000	112460000		chr10	49660000	49670000	chr10	49850000	49860000		chr10	38140000	38150000	chr10	38390000	38400000		chr10	75880000	75890000	chr10	75990000	76000000
	chr10	134270000	134280000	chr10	134350000	134360000		chr10	100010000	100020000	chr10	100090000	100100000		chr10	112370000	112380000	chr10	112630000	112640000		chr10	112380000	112390000	chr10	112630000	112640000		chr10	60070000	60080000	chr10	60430000	60440000		chr10	38160000	38170000	chr10	38250000	38260000		chr10	126230000	126240000	chr10	126370000	126380000
	chr10	134280000	134290000	chr10	134700000	134710000		chr10	100010000	100020000	chr10	100150000	100160000		chr10	112370000	112380000	chr10	112960000	112970000		chr10	112360000	112370000	chr10	112680000	112690000		chr10	60060000	60070000	chr10	60140000	60150000		chr10	32480000	32490000	chr10	32650000	32660000		chr10	126230000	126240000	chr10	126330000	126340000
	chr10	134270000	134280000	chr10	134440000	134450000		chr10	100010000	100020000	chr10	100430000	100440000		chr10	112360000	112370000	chr10	112440000	112450000		chr10	119270000	119280000	chr10	119480000	119490000		chr10	60080000	60090000	chr10	60520000	60530000		chr10	79010000	79020000	chr10	79400000	79410000		chr10	126220000	126230000	chr10	126430000	126440000
	chr10	112500000	112510000	chr10	112830000	112840000		chr10	105470000	105480000	chr10	105610000	105620000		chr10	112380000	112390000	chr10	112470000	112480000		chr10	119250000	119260000	chr10	120000000	120010000		chr10	70280000	70290000	chr10	70470000	70480000		chr10	73720000	73730000	chr10	73800000	73810000		chr10	74370000	74380000	chr10	74450000	74460000
	chr10	112500000	112510000	chr10	112740000	112750000		chr10	105470000	105480000	chr10	105720000	105730000		chr10	112310000	112320000	chr10	112430000	112440000		chr10	119310000	119320000	chr10	119870000	119880000		chr10	70290000	70300000	chr10	70650000	70660000		chr10	73710000	73720000	chr10	74000000	74010000		chr10	74370000	74380000	chr10	74590000	74600000
	chr10	112510000	112520000	chr10	112630000	112640000		chr10	3280000	3290000	chr10	3500000	3510000		chr10	112360000	112370000	chr10	112760000	112770000		chr10	119250000	119260000	chr10	120180000	120190000		chr10	79980000	79990000	chr10	80950000	80960000		chr10	73710000	73720000	chr10	74090000	74100000		chr10	71910000	71920000	chr10	72120000	72130000
	chr10	54060000	54070000	chr10	54320000	54330000		chr10	3280000	3290000	chr10	3570000	3580000		chr10	112380000	112390000	chr10	112880000	112890000		chr10	71410000	71420000	chr10	71680000	71690000		chr10	80040000	80050000	chr10	80950000	80960000		chr10	7150000	7160000	chr10	7450000	7460000		chr10	77690000	77700000	chr10	78300000	78310000
	chr10	54070000	54080000	chr10	54240000	54250000		chr10	3240000	3250000	chr10	4690000	4700000		chr10	70980000	70990000	chr10	71260000	71270000		chr10	71400000	71410000	chr10	71480000	71490000		chr10	80080000	80090000	chr10	80160000	80170000		chr10	14870000	14880000	chr10	14990000	15000000		chr10	77690000	77700000	chr10	77770000	77780000
	chr10	54050000	54060000	chr10	54520000	54530000		chr10	3260000	3270000	chr10	4080000	4090000		chr10	70870000	70880000	chr10	71260000	71270000		chr10	35630000	35640000	chr10	35810000	35820000		chr10	79970000	79980000	chr10	80420000	80430000		chr10	14910000	14920000	chr10	14990000	15000000		chr10	62200000	62210000	chr10	62400000	62410000
	chr10	54050000	54060000	chr10	54470000	54480000		chr10	3280000	3290000	chr10	3790000	3800000		chr10	70880000	70890000	chr10	70970000	70980000		chr10	76580000	76590000	chr10	76850000	76860000		chr10	95460000	95470000	chr10	95570000	95580000		chr10	15030000	15040000	chr10	15130000	15140000		chr10	62200000	62210000	chr10	62520000	62530000
	chr10	95130000	95140000	chr10	95450000	95460000		chr10	3280000	3290000	chr10	3720000	3730000		chr10	70990000	71000000	chr10	71390000	71400000		chr10	10640000	10650000	chr10	11070000	11080000		chr10	84550000	84560000	chr10	85630000	85640000		chr10	43710000	43720000	chr10	43950000	43960000		chr10	104150000	104160000	chr10	104240000	104250000
	chr10	95150000	95160000	chr10	95230000	95240000		chr10	3280000	3290000	chr10	3650000	3660000		chr10	70990000	71000000	chr10	71150000	71160000		chr10	134030000	134040000	chr10	134260000	134270000		chr10	130070000	130080000	chr10	130310000	130320000		chr10	43700000	43710000	chr10	43840000	43850000		chr10	104150000	104160000	chr10	104340000	104350000
	chr10	81710000	81720000	chr10	81800000	81810000		chr10	3280000	3290000	chr10	3940000	3950000		chr10	71050000	71060000	chr10	71140000	71150000		chr10	134030000	134040000	chr10	134160000	134170000		chr10	12940000	12950000	chr10	13100000	13110000		chr10	89280000	89290000	chr10	89490000	89500000		chr10	130430000	130440000	chr10	130630000	130640000
	chr10	119590000	119600000	chr10	120030000	120040000		chr10	3240000	3250000	chr10	4030000	4040000		chr10	71000000	71010000	chr10	71080000	71090000		chr10	134030000	134040000	chr10	134410000	134420000		chr10	103050000	103060000	chr10	103320000	103330000		chr10	12760000	12770000	chr10	12940000	12950000		chr10	18420000	18430000	chr10	18500000	18510000
	chr10	119620000	119630000	chr10	119860000	119870000		chr10	3250000	3260000	chr10	4550000	4560000		chr10	103360000	103370000	chr10	103450000	103460000		chr10	61950000	61960000	chr10	62400000	62410000		chr10	103040000	103050000	chr10	103200000	103210000		chr10	12760000	12770000	chr10	13110000	13120000		chr10	17330000	17340000	chr10	17440000	17450000
	chr10	95460000	95470000	chr10	95570000	95580000		chr10	3240000	3250000	chr10	4500000	4510000		chr10	103360000	103370000	chr10	103530000	103540000		chr10	62030000	62040000	chr10	62180000	62190000		chr10	65300000	65310000	chr10	65460000	65470000		chr10	15510000	15520000	chr10	15700000	15710000		chr10	97970000	97980000	chr10	98050000	98060000
	chr10	8090000	8100000	chr10	8400000	8410000		chr10	3230000	3240000	chr10	4320000	4330000		chr10	103350000	103360000	chr10	103830000	103840000		chr10	116220000	116230000	chr10	116300000	116310000		chr10	65270000	65280000	chr10	65380000	65390000		chr10	15470000	15480000	chr10	15760000	15770000		chr10	93140000	93150000	chr10	93300000	93310000
	chr10	8110000	8120000	chr10	8350000	8360000		chr10	3230000	3240000	chr10	4810000	4820000		chr10	103360000	103370000	chr10	103780000	103790000		chr10	116230000	116240000	chr10	116540000	116550000		chr10	65220000	65230000	chr10	65360000	65370000		chr10	101380000	101390000	chr10	101480000	101490000		chr10	93130000	93140000	chr10	93410000	93420000
	chr10	8100000	8110000	chr10	9250000	9260000		chr10	3240000	3250000	chr10	4430000	4440000		chr10	76430000	76440000	chr10	76560000	76570000		chr10	116200000	116210000	chr10	116420000	116430000		chr10	134950000	134960000	chr10	135130000	135140000		chr10	90790000	90800000	chr10	90960000	90970000		chr10	93140000	93150000	chr10	93670000	93680000
	chr10	8080000	8090000	chr10	9120000	9130000		chr10	102490000	102500000	chr10	102630000	102640000		chr10	76420000	76430000	chr10	76770000	76780000		chr10	43180000	43190000	chr10	43270000	43280000		chr10	134950000	134960000	chr10	135040000	135050000		chr10	126760000	126770000	chr10	126840000	126850000		chr10	127660000	127670000	chr10	128070000	128080000
	chr10	8110000	8120000	chr10	8910000	8920000		chr10	102500000	102510000	chr10	102760000	102770000		chr10	76400000	76410000	chr10	76850000	76860000		chr10	43130000	43140000	chr10	43290000	43300000		chr10	44880000	44890000	chr10	45350000	45360000		chr10	7300000	7310000	chr10	7450000	7460000		chr10	127660000	127670000	chr10	128190000	128200000
	chr10	8090000	8100000	chr10	8750000	8760000		chr10	31910000	31920000	chr10	32050000	32060000		chr10	98230000	98240000	chr10	98490000	98500000		chr10	43140000	43150000	chr10	43590000	43600000		chr10	114720000	114730000	chr10	115310000	115320000		chr10	77040000	77050000	chr10	77120000	77130000		chr10	127650000	127660000	chr10	128430000	128440000
	chr10	8090000	8100000	chr10	9340000	9350000		chr10	102320000	102330000	chr10	102630000	102640000		chr10	98150000	98160000	chr10	98790000	98800000		chr10	330000	340000	chr10	530000	540000		chr10	114710000	114720000	chr10	115140000	115150000		chr10	3590000	3600000	chr10	3670000	3680000		chr10	127680000	127690000	chr10	127960000	127970000
	chr10	8090000	8100000	chr10	8630000	8640000		chr10	102310000	102320000	chr10	102740000	102750000		chr10	98130000	98140000	chr10	98870000	98880000		chr10	320000	330000	chr10	820000	830000		chr10	114710000	114720000	chr10	114880000	114890000		chr10	3510000	3520000	chr10	3720000	3730000		chr10	74270000	74280000	chr10	74440000	74450000
	chr10	103360000	103370000	chr10	103540000	103550000		chr10	102320000	102330000	chr10	102500000	102510000		chr10	98150000	98160000	chr10	98270000	98280000		chr10	72670000	72680000	chr10	73030000	73040000		chr10	37720000	37730000	chr10	38040000	38050000		chr10	3510000	3520000	chr10	3910000	3920000		chr10	74320000	74330000	chr10	74600000	74610000
	chr10	103350000	103360000	chr10	103770000	103780000		chr10	93610000	93620000	chr10	94190000	94200000		chr10	98140000	98150000	chr10	98370000	98380000		chr10	72680000	72690000	chr10	72960000	72970000		chr10	102970000	102980000	chr10	103330000	103340000		chr10	3510000	3520000	chr10	3820000	3830000		chr10	74240000	74250000	chr10	74610000	74620000
	chr10	103350000	103360000	chr10	103840000	103850000		chr10	93580000	93590000	chr10	94220000	94230000		chr10	98150000	98160000	chr10	98960000	98970000		chr10	4390000	4400000	chr10	4670000	4680000		chr10	102970000	102980000	chr10	103760000	103770000		chr10	3580000	3590000	chr10	3780000	3790000		chr10	28020000	28030000	chr10	28520000	28530000
	chr10	4720000	4730000	chr10	4800000	4810000		chr10	93600000	93610000	chr10	93760000	93770000		chr10	98150000	98160000	chr10	98580000	98590000		chr10	4410000	4420000	chr10	4810000	4820000		chr10	102970000	102980000	chr10	103220000	103230000		chr10	3510000	3520000	chr10	4700000	4710000		chr10	28070000	28080000	chr10	28510000	28520000
	chr10	45420000	45430000	chr10	45500000	45510000		chr10	12580000	12590000	chr10	12690000	12700000		chr10	98260000	98270000	chr10	98590000	98600000		chr10	121510000	121520000	chr10	121600000	121610000		chr10	102970000	102980000	chr10	103540000	103550000		chr10	134020000	134030000	chr10	134450000	134460000		chr10	28030000	28040000	chr10	28670000	28680000
	chr10	45410000	45420000	chr10	45670000	45680000		chr10	12520000	12530000	chr10	12700000	12710000		chr10	109640000	109650000	chr10	109910000	109920000		chr10	121440000	121450000	chr10	121610000	121620000		chr10	124020000	124030000	chr10	124460000	124470000		chr10	112170000	112180000	chr10	112280000	112290000		chr10	28030000	28040000	chr10	28460000	28470000
	chr10	54760000	54770000	chr10	54950000	54960000		chr10	12530000	12540000	chr10	12940000	12950000		chr10	109570000	109580000	chr10	110540000	110550000		chr10	90220000	90230000	chr10	90570000	90580000		chr10	124100000	124110000	chr10	124190000	124200000		chr10	122910000	122920000	chr10	123360000	123370000		chr10	14240000	14250000	chr10	14510000	14520000
	chr10	54790000	54800000	chr10	55140000	55150000		chr10	79600000	79610000	chr10	79730000	79740000		chr10	109580000	109590000	chr10	110300000	110310000		chr10	90180000	90190000	chr10	90560000	90570000		chr10	124060000	124070000	chr10	124320000	124330000		chr10	63510000	63520000	chr10	63790000	63800000		chr10	14230000	14240000	chr10	14870000	14880000
	chr10	124040000	124050000	chr10	124190000	124200000		chr10	119260000	119270000	chr10	119860000	119870000		chr10	61000000	61010000	chr10	61570000	61580000		chr10	90230000	90240000	chr10	90310000	90320000		chr10	76180000	76190000	chr10	76740000	76750000		chr10	63510000	63520000	chr10	63590000	63600000		chr10	6700000	6710000	chr10	7290000	7300000
	chr10	124050000	124060000	chr10	124310000	124320000		chr10	119300000	119310000	chr10	119430000	119440000		chr10	61000000	61010000	chr10	61220000	61230000		chr10	90130000	90140000	chr10	90300000	90310000		chr10	76190000	76200000	chr10	76840000	76850000		chr10	63510000	63520000	chr10	63660000	63670000		chr10	6700000	6710000	chr10	7450000	7460000
	chr10	122700000	122710000	chr10	123640000	123650000		chr10	119180000	119190000	chr10	119430000	119440000		chr10	61000000	61010000	chr10	61800000	61810000		chr10	90240000	90250000	chr10	90440000	90450000		chr10	105270000	105280000	chr10	105450000	105460000		chr10	27170000	27180000	chr10	27640000	27650000		chr10	78930000	78940000	chr10	79400000	79410000
	chr10	122710000	122720000	chr10	123340000	123350000		chr10	119280000	119290000	chr10	119590000	119600000		chr10	61000000	61010000	chr10	61340000	61350000		chr10	22870000	22880000	chr10	22990000	23000000		chr10	105250000	105260000	chr10	105350000	105360000		chr10	27180000	27190000	chr10	27380000	27390000		chr10	78930000	78940000	chr10	79150000	79160000
	chr10	122700000	122710000	chr10	123030000	123040000		chr10	119250000	119260000	chr10	120210000	120220000		chr10	73720000	73730000	chr10	74090000	74100000		chr10	22870000	22880000	chr10	23360000	23370000		chr10	123000000	123010000	chr10	123360000	123370000		chr10	81300000	81310000	chr10	81690000	81700000		chr10	78930000	78940000	chr10	79270000	79280000
	chr10	122700000	122710000	chr10	123220000	123230000		chr10	119180000	119190000	chr10	120200000	120210000		chr10	73680000	73690000	chr10	73900000	73910000		chr10	22870000	22880000	chr10	23280000	23290000		chr10	123000000	123010000	chr10	123080000	123090000		chr10	23280000	23290000	chr10	23360000	23370000		chr10	78930000	78940000	chr10	79470000	79480000
	chr10	122710000	122720000	chr10	123070000	123080000		chr10	119250000	119260000	chr10	120000000	120010000		chr10	73710000	73720000	chr10	73800000	73810000		chr10	115450000	115460000	chr10	115530000	115540000		chr10	16480000	16490000	chr10	16830000	16840000		chr10	124050000	124060000	chr10	124200000	124210000		chr10	73880000	73890000	chr10	73970000	73980000
	chr10	122700000	122710000	chr10	123490000	123500000		chr10	119250000	119260000	chr10	120300000	120310000		chr10	73580000	73590000	chr10	73800000	73810000		chr10	115460000	115470000	chr10	115860000	115870000		chr10	16480000	16490000	chr10	16560000	16570000		chr10	124100000	124110000	chr10	124190000	124200000		chr10	73880000	73890000	chr10	74100000	74110000
	chr10	122720000	122730000	chr10	122920000	122930000		chr10	119300000	119310000	chr10	119480000	119490000		chr10	73710000	73720000	chr10	73980000	73990000		chr10	115460000	115470000	chr10	115790000	115800000		chr10	105360000	105370000	chr10	105440000	105450000		chr10	124100000	124110000	chr10	124320000	124330000		chr10	95830000	95840000	chr10	96070000	96080000
	chr10	5750000	5760000	chr10	5910000	5920000		chr10	6710000	6720000	chr10	7280000	7290000		chr10	73590000	73600000	chr10	73990000	74000000		chr10	101600000	101610000	chr10	101810000	101820000		chr10	105350000	105360000	chr10	105620000	105630000		chr10	124050000	124060000	chr10	124320000	124330000		chr10	121440000	121450000	chr10	121610000	121620000
	chr10	5680000	5690000	chr10	5770000	5780000		chr10	6710000	6720000	chr10	7110000	7120000		chr10	73570000	73580000	chr10	73650000	73660000		chr10	101600000	101610000	chr10	101930000	101940000		chr10	80420000	80430000	chr10	80950000	80960000		chr10	54070000	54080000	chr10	54240000	54250000		chr10	105160000	105170000	chr10	105240000	105250000
	chr10	81130000	81140000	chr10	81690000	81700000		chr10	6720000	6730000	chr10	6970000	6980000		chr10	100020000	100030000	chr10	100420000	100430000		chr10	95590000	95600000	chr10	96080000	96090000		chr10	80420000	80430000	chr10	80820000	80830000		chr10	54060000	54070000	chr10	54320000	54330000		chr10	105170000	105180000	chr10	105330000	105340000
	chr10	81130000	81140000	chr10	81220000	81230000		chr10	6720000	6730000	chr10	7010000	7020000		chr10	100020000	100030000	chr10	100170000	100180000		chr10	95580000	95590000	chr10	95680000	95690000		chr10	92670000	92680000	chr10	93010000	93020000		chr10	105650000	105660000	chr10	105960000	105970000		chr10	105160000	105170000	chr10	105440000	105450000
	chr10	133340000	133350000	chr10	133610000	133620000		chr10	6710000	6720000	chr10	6870000	6880000		chr10	84290000	84300000	chr10	84510000	84520000		chr10	86020000	86030000	chr10	86110000	86120000		chr10	92650000	92660000	chr10	93130000	93140000		chr10	105650000	105660000	chr10	105870000	105880000		chr10	15470000	15480000	chr10	15750000	15760000
	chr10	82410000	82420000	chr10	83570000	83580000		chr10	6710000	6720000	chr10	7460000	7470000		chr10	20100000	20110000	chr10	21050000	21060000		chr10	86020000	86030000	chr10	86290000	86300000		chr10	92660000	92670000	chr10	93470000	93480000		chr10	105660000	105670000	chr10	105750000	105760000		chr10	15470000	15480000	chr10	15860000	15870000
	chr10	82450000	82460000	chr10	82700000	82710000		chr10	73380000	73390000	chr10	73560000	73570000		chr10	20110000	20120000	chr10	21140000	21150000		chr10	38120000	38130000	chr10	38380000	38390000		chr10	92660000	92670000	chr10	93660000	93670000		chr10	63660000	63670000	chr10	63750000	63760000		chr10	48470000	48480000	chr10	48650000	48660000
	chr10	32130000	32140000	chr10	32220000	32230000		chr10	90590000	90600000	chr10	90970000	90980000		chr10	20100000	20110000	chr10	20840000	20850000		chr10	38130000	38140000	chr10	38620000	38630000		chr10	29320000	29330000	chr10	29400000	29410000		chr10	63650000	63660000	chr10	64000000	64010000		chr10	134270000	134280000	chr10	134350000	134360000
	chr10	32140000	32150000	chr10	32470000	32480000		chr10	90590000	90600000	chr10	90680000	90690000		chr10	83980000	83990000	chr10	84120000	84130000		chr10	79820000	79830000	chr10	80410000	80420000		chr10	29280000	29290000	chr10	29600000	29610000		chr10	92530000	92540000	chr10	92620000	92630000		chr10	134270000	134280000	chr10	134450000	134460000
	chr10	76390000	76400000	chr10	76770000	76780000		chr10	90600000	90610000	chr10	90740000	90750000		chr10	102210000	102220000	chr10	102490000	102500000		chr10	79800000	79810000	chr10	80950000	80960000		chr10	93850000	93860000	chr10	94060000	94070000		chr10	28960000	28970000	chr10	29280000	29290000		chr10	72310000	72320000	chr10	72510000	72520000
	chr10	76360000	76370000	chr10	76850000	76860000		chr10	103990000	104000000	chr10	104110000	104120000		chr10	102190000	102200000	chr10	102630000	102640000		chr10	79800000	79810000	chr10	80820000	80830000		chr10	93840000	93850000	chr10	94190000	94200000		chr10	28950000	28960000	chr10	29590000	29600000		chr10	72310000	72320000	chr10	72430000	72440000
	chr10	91710000	91720000	chr10	91890000	91900000		chr10	103930000	103940000	chr10	104170000	104180000		chr10	102200000	102210000	chr10	102370000	102380000		chr10	79830000	79840000	chr10	80370000	80380000		chr10	33080000	33090000	chr10	33440000	33450000		chr10	28940000	28950000	chr10	29500000	29510000		chr10	11820000	11830000	chr10	12020000	12030000
	chr10	97470000	97480000	chr10	97590000	97600000		chr10	103990000	104000000	chr10	104220000	104230000		chr10	102190000	102200000	chr10	102270000	102280000		chr10	8960000	8970000	chr10	9240000	9250000		chr10	33100000	33110000	chr10	33180000	33190000		chr10	28960000	28970000	chr10	29410000	29420000		chr10	70550000	70560000	chr10	70650000	70660000
	chr10	27520000	27530000	chr10	27820000	27830000		chr10	103920000	103930000	chr10	104240000	104250000		chr10	65030000	65040000	chr10	65120000	65130000		chr10	88450000	88460000	chr10	88660000	88670000		chr10	33080000	33090000	chr10	33290000	33300000		chr10	5480000	5490000	chr10	5720000	5730000		chr10	61850000	61860000	chr10	62400000	62410000
	chr10	27530000	27540000	chr10	27620000	27630000		chr10	103950000	103960000	chr10	104330000	104340000		chr10	64980000	64990000	chr10	65140000	65150000		chr10	114070000	114080000	chr10	114190000	114200000		chr10	129510000	129520000	chr10	129860000	129870000		chr10	5480000	5490000	chr10	5830000	5840000		chr10	61960000	61970000	chr10	62400000	62410000
	chr10	90160000	90170000	chr10	90310000	90320000		chr10	17140000	17150000	chr10	17290000	17300000		chr10	65020000	65030000	chr10	65220000	65230000		chr10	111630000	111640000	chr10	112020000	112030000		chr10	129510000	129520000	chr10	129800000	129810000		chr10	5480000	5490000	chr10	5660000	5670000		chr10	61860000	61870000	chr10	61960000	61970000
	chr10	12930000	12940000	chr10	13120000	13130000		chr10	120320000	120330000	chr10	120550000	120560000		chr10	64970000	64980000	chr10	65470000	65480000		chr10	111630000	111640000	chr10	111850000	111860000		chr10	129510000	129520000	chr10	129940000	129950000		chr10	5480000	5490000	chr10	5910000	5920000		chr10	61850000	61860000	chr10	62190000	62200000
	chr10	92760000	92770000	chr10	93010000	93020000		chr10	120340000	120350000	chr10	120650000	120660000		chr10	64970000	64980000	chr10	65380000	65390000		chr10	87850000	87860000	chr10	88130000	88140000		chr10	129510000	129520000	chr10	129650000	129660000		chr10	52170000	52180000	chr10	52380000	52390000		chr10	61990000	62000000	chr10	62190000	62200000
	chr10	92840000	92850000	chr10	93020000	93030000		chr10	120320000	120330000	chr10	120770000	120780000		chr10	37070000	37080000	chr10	37150000	37160000		chr10	70740000	70750000	chr10	71150000	71160000		chr10	69970000	69980000	chr10	70060000	70070000		chr10	23450000	23460000	chr10	23830000	23840000		chr10	102970000	102980000	chr10	103050000	103060000
	chr10	22290000	22300000	chr10	22500000	22510000		chr10	120330000	120340000	chr10	120470000	120480000		chr10	5470000	5480000	chr10	5890000	5900000		chr10	70760000	70770000	chr10	70940000	70950000		chr10	69970000	69980000	chr10	70630000	70640000		chr10	121030000	121040000	chr10	121170000	121180000		chr10	102910000	102920000	chr10	103050000	103060000
	chr10	22260000	22270000	chr10	22860000	22870000		chr10	120330000	120340000	chr10	120930000	120940000		chr10	5500000	5510000	chr10	5820000	5830000		chr10	70760000	70770000	chr10	70850000	70860000		chr10	107710000	107720000	chr10	107930000	107940000		chr10	69830000	69840000	chr10	69910000	69920000		chr10	102970000	102980000	chr10	103220000	103230000
	chr10	22300000	22310000	chr10	22460000	22470000		chr10	120330000	120340000	chr10	120720000	120730000		chr10	5480000	5490000	chr10	5660000	5670000		chr10	32200000	32210000	chr10	32290000	32300000		chr10	27840000	27850000	chr10	28670000	28680000		chr10	64570000	64580000	chr10	64890000	64900000		chr10	102910000	102920000	chr10	103220000	103230000
	chr10	22270000	22280000	chr10	23280000	23290000		chr10	69970000	69980000	chr10	70650000	70660000		chr10	5490000	5500000	chr10	5730000	5740000		chr10	32210000	32220000	chr10	32620000	32630000		chr10	27850000	27860000	chr10	28520000	28530000		chr10	64580000	64590000	chr10	64840000	64850000		chr10	102970000	102980000	chr10	103530000	103540000
	chr10	20110000	20120000	chr10	20400000	20410000		chr10	69970000	69980000	chr10	70060000	70070000		chr10	110810000	110820000	chr10	111530000	111540000		chr10	64970000	64980000	chr10	65220000	65230000		chr10	27840000	27850000	chr10	28460000	28470000		chr10	21620000	21630000	chr10	21780000	21790000		chr10	102940000	102950000	chr10	103520000	103530000
	chr10	20110000	20120000	chr10	20190000	20200000		chr10	45210000	45220000	chr10	45320000	45330000		chr10	107060000	107070000	chr10	107450000	107460000		chr10	65020000	65030000	chr10	65190000	65200000		chr10	27840000	27850000	chr10	27930000	27940000		chr10	6960000	6970000	chr10	7160000	7170000		chr10	102970000	102980000	chr10	103320000	103330000
	chr10	29850000	29860000	chr10	30150000	30160000		chr10	45070000	45080000	chr10	45310000	45320000		chr10	107000000	107010000	chr10	107420000	107430000		chr10	64940000	64950000	chr10	65470000	65480000		chr10	111750000	111760000	chr10	111860000	111870000		chr10	6950000	6960000	chr10	7450000	7460000		chr10	23440000	23450000	chr10	23810000	23820000
	chr10	29860000	29870000	chr10	30240000	30250000		chr10	91570000	91580000	chr10	92010000	92020000		chr10	107040000	107050000	chr10	107190000	107200000		chr10	65020000	65030000	chr10	65470000	65480000		chr10	111730000	111740000	chr10	112040000	112050000		chr10	6950000	6960000	chr10	7290000	7300000		chr10	23430000	23440000	chr10	23980000	23990000
	chr10	100020000	100030000	chr10	100160000	100170000		chr10	91550000	91560000	chr10	92160000	92170000		chr10	97470000	97480000	chr10	97940000	97950000		chr10	65020000	65030000	chr10	65270000	65280000		chr10	69920000	69930000	chr10	70050000	70060000		chr10	6960000	6970000	chr10	7070000	7080000		chr10	120330000	120340000	chr10	120560000	120570000
	chr10	121170000	121180000	chr10	121250000	121260000		chr10	91540000	91550000	chr10	92610000	92620000		chr10	97470000	97480000	chr10	97740000	97750000		chr10	64970000	64980000	chr10	65300000	65310000		chr10	23600000	23610000	chr10	23990000	24000000		chr10	111890000	111900000	chr10	112300000	112310000		chr10	120320000	120330000	chr10	120780000	120790000
	chr10	121180000	121190000	chr10	121290000	121300000		chr10	91550000	91560000	chr10	91890000	91900000		chr10	97450000	97460000	chr10	97600000	97610000		chr10	64970000	64980000	chr10	65380000	65390000		chr10	23610000	23620000	chr10	23750000	23760000		chr10	111890000	111900000	chr10	111970000	111980000		chr10	120320000	120330000	chr10	120470000	120480000
	chr10	116220000	116230000	chr10	116300000	116310000		chr10	91580000	91590000	chr10	91700000	91710000		chr10	97520000	97530000	chr10	98090000	98100000		chr10	65030000	65040000	chr10	65390000	65400000		chr10	23600000	23610000	chr10	23810000	23820000		chr10	72220000	72230000	chr10	72510000	72520000		chr10	79790000	79800000	chr10	81040000	81050000
	chr10	116220000	116230000	chr10	116450000	116460000		chr10	91550000	91560000	chr10	91780000	91790000		chr10	97450000	97460000	chr10	98090000	98100000		chr10	114480000	114490000	chr10	114890000	114900000		chr10	103640000	103650000	chr10	103770000	103780000		chr10	93850000	93860000	chr10	94190000	94200000		chr10	79810000	79820000	chr10	80410000	80420000
	chr10	116230000	116240000	chr10	116390000	116400000		chr10	91550000	91560000	chr10	92410000	92420000		chr10	53150000	53160000	chr10	53970000	53980000		chr10	114490000	114500000	chr10	114570000	114580000		chr10	49760000	49770000	chr10	50720000	50730000		chr10	93850000	93860000	chr10	94000000	94010000		chr10	79800000	79810000	chr10	80820000	80830000
	chr10	116220000	116230000	chr10	116530000	116540000		chr10	33630000	33640000	chr10	34200000	34210000		chr10	53160000	53170000	chr10	53710000	53720000		chr10	114470000	114480000	chr10	114710000	114720000		chr10	49760000	49770000	chr10	49850000	49860000		chr10	93850000	93860000	chr10	94050000	94060000		chr10	79810000	79820000	chr10	80730000	80740000
	chr10	101330000	101340000	chr10	101470000	101480000		chr10	33620000	33630000	chr10	34220000	34230000		chr10	106690000	106700000	chr10	107440000	107450000		chr10	114480000	114490000	chr10	115140000	115150000		chr10	26890000	26900000	chr10	26970000	26980000		chr10	61590000	61600000	chr10	61780000	61790000		chr10	79810000	79820000	chr10	80650000	80660000
	chr10	118670000	118680000	chr10	118920000	118930000		chr10	33610000	33620000	chr10	34360000	34370000		chr10	63370000	63380000	chr10	63480000	63490000		chr10	77950000	77960000	chr10	78300000	78310000		chr10	26860000	26870000	chr10	27630000	27640000		chr10	104590000	104600000	chr10	104670000	104680000		chr10	79830000	79840000	chr10	79920000	79930000
	chr10	118690000	118700000	chr10	118770000	118780000		chr10	33600000	33610000	chr10	34460000	34470000		chr10	63390000	63400000	chr10	63990000	64000000		chr10	34400000	34410000	chr10	34920000	34930000		chr10	26890000	26900000	chr10	27170000	27180000		chr10	104590000	104600000	chr10	105000000	105010000		chr10	79800000	79810000	chr10	80950000	80960000
	chr10	64360000	64370000	chr10	64590000	64600000		chr10	33600000	33610000	chr10	34610000	34620000		chr10	63370000	63380000	chr10	63630000	63640000		chr10	3830000	3840000	chr10	3920000	3930000		chr10	77060000	77070000	chr10	78060000	78070000		chr10	104600000	104610000	chr10	104820000	104830000		chr10	79810000	79820000	chr10	80190000	80200000
	chr10	64350000	64360000	chr10	64840000	64850000		chr10	33620000	33630000	chr10	33780000	33790000		chr10	50090000	50100000	chr10	50700000	50710000		chr10	3830000	3840000	chr10	4690000	4700000		chr10	49430000	49440000	chr10	49690000	49700000		chr10	61980000	61990000	chr10	62180000	62190000		chr10	79800000	79810000	chr10	80150000	80160000
	chr10	112370000	112380000	chr10	112640000	112650000		chr10	33630000	33640000	chr10	34090000	34100000		chr10	101380000	101390000	chr10	101470000	101480000		chr10	3830000	3840000	chr10	4470000	4480000		chr10	98150000	98160000	chr10	98320000	98330000		chr10	24670000	24680000	chr10	24750000	24760000		chr10	79820000	79830000	chr10	80090000	80100000
	chr10	112370000	112380000	chr10	112500000	112510000		chr10	33610000	33620000	chr10	34920000	34930000		chr10	35130000	35140000	chr10	35240000	35250000		chr10	3840000	3850000	chr10	4550000	4560000		chr10	98160000	98170000	chr10	98260000	98270000		chr10	6040000	6050000	chr10	6440000	6450000		chr10	5840000	5850000	chr10	5920000	5930000
	chr10	103050000	103060000	chr10	103540000	103550000		chr10	38080000	38090000	chr10	38240000	38250000		chr10	104950000	104960000	chr10	105090000	105100000		chr10	3830000	3840000	chr10	4410000	4420000		chr10	98140000	98150000	chr10	98780000	98790000		chr10	50620000	50630000	chr10	50710000	50720000		chr10	123700000	123710000	chr10	123860000	123870000
	chr10	103050000	103060000	chr10	103320000	103330000		chr10	38030000	38040000	chr10	38660000	38670000		chr10	103990000	104000000	chr10	104230000	104240000		chr10	3820000	3830000	chr10	4800000	4810000		chr10	98150000	98160000	chr10	98980000	98990000		chr10	25390000	25400000	chr10	25970000	25980000		chr10	121510000	121520000	chr10	121610000	121620000
	chr10	103050000	103060000	chr10	103200000	103210000		chr10	35280000	35290000	chr10	35500000	35510000		chr10	103970000	103980000	chr10	104330000	104340000		chr10	3840000	3850000	chr10	4010000	4020000		chr10	98140000	98150000	chr10	98580000	98590000		chr10	95130000	95140000	chr10	95240000	95250000		chr10	11150000	11160000	chr10	11510000	11520000
	chr10	103060000	103070000	chr10	103290000	103300000		chr10	35290000	35300000	chr10	35390000	35400000		chr10	103990000	104000000	chr10	104110000	104120000		chr10	3830000	3840000	chr10	4300000	4310000		chr10	89860000	89870000	chr10	90140000	90150000		chr10	97450000	97460000	chr10	97590000	97600000		chr10	11150000	11160000	chr10	11310000	11320000
	chr10	45240000	45250000	chr10	45340000	45350000		chr10	27190000	27200000	chr10	27270000	27280000		chr10	103920000	103930000	chr10	104110000	104120000		chr10	21660000	21670000	chr10	21770000	21780000		chr10	89980000	89990000	chr10	90140000	90150000		chr10	6880000	6890000	chr10	7450000	7460000		chr10	44660000	44670000	chr10	44880000	44890000
	chr10	80830000	80840000	chr10	80910000	80920000		chr10	27180000	27190000	chr10	27460000	27470000		chr10	104290000	104300000	chr10	104640000	104650000		chr10	21670000	21680000	chr10	22250000	22260000		chr10	89890000	89900000	chr10	90300000	90310000		chr10	3850000	3860000	chr10	4010000	4020000		chr10	6960000	6970000	chr10	7160000	7170000
	chr10	119880000	119890000	chr10	119970000	119980000		chr10	27180000	27190000	chr10	27640000	27650000		chr10	104290000	104300000	chr10	104710000	104720000		chr10	15470000	15480000	chr10	15760000	15770000		chr10	90000000	90010000	chr10	90310000	90320000		chr10	3850000	3860000	chr10	4090000	4100000		chr10	6960000	6970000	chr10	7300000	7310000
	chr10	130060000	130070000	chr10	130300000	130310000		chr10	27220000	27230000	chr10	27640000	27650000		chr10	104260000	104270000	chr10	104340000	104350000		chr10	15470000	15480000	chr10	15860000	15870000		chr10	35920000	35930000	chr10	37060000	37070000		chr10	3830000	3840000	chr10	3930000	3940000		chr10	6960000	6970000	chr10	7450000	7460000
	chr10	65630000	65640000	chr10	65730000	65740000		chr10	7060000	7070000	chr10	7460000	7470000		chr10	104290000	104300000	chr10	104780000	104790000		chr10	43360000	43370000	chr10	43960000	43970000		chr10	35920000	35930000	chr10	37170000	37180000		chr10	3840000	3850000	chr10	4200000	4210000		chr10	3770000	3780000	chr10	4700000	4710000
	chr10	114070000	114080000	chr10	114160000	114170000		chr10	6980000	6990000	chr10	7450000	7460000		chr10	92500000	92510000	chr10	93030000	93040000		chr10	43380000	43390000	chr10	43460000	43470000		chr10	97130000	97140000	chr10	97360000	97370000		chr10	3790000	3800000	chr10	4690000	4700000		chr10	29900000	29910000	chr10	30010000	30020000
	chr10	8740000	8750000	chr10	8870000	8880000		chr10	125420000	125430000	chr10	125720000	125730000		chr10	92510000	92520000	chr10	92620000	92630000		chr10	43360000	43370000	chr10	43600000	43610000		chr10	97180000	97190000	chr10	97610000	97620000		chr10	93390000	93400000	chr10	93670000	93680000		chr10	29880000	29890000	chr10	30140000	30150000
	chr10	8730000	8740000	chr10	8900000	8910000		chr10	31510000	31520000	chr10	31680000	31690000		chr10	92360000	92370000	chr10	92480000	92490000		chr10	6470000	6480000	chr10	6710000	6720000		chr10	27510000	27520000	chr10	27640000	27650000		chr10	103570000	103580000	chr10	103760000	103770000		chr10	43380000	43390000	chr10	43970000	43980000
	chr10	8740000	8750000	chr10	9330000	9340000		chr10	31520000	31530000	chr10	31760000	31770000		chr10	88180000	88190000	chr10	88530000	88540000		chr10	70280000	70290000	chr10	70490000	70500000		chr10	119610000	119620000	chr10	120000000	120010000		chr10	103580000	103590000	chr10	103810000	103820000		chr10	43350000	43360000	chr10	43590000	43600000
	chr10	6710000	6720000	chr10	6950000	6960000		chr10	43470000	43480000	chr10	43570000	43580000		chr10	88150000	88160000	chr10	88340000	88350000		chr10	70220000	70230000	chr10	70650000	70660000		chr10	66740000	66750000	chr10	67940000	67950000		chr10	24900000	24910000	chr10	25150000	25160000		chr10	114320000	114330000	chr10	114880000	114890000
	chr10	6710000	6720000	chr10	7450000	7460000		chr10	67960000	67970000	chr10	68700000	68710000		chr10	88150000	88160000	chr10	88650000	88660000		chr10	70300000	70310000	chr10	70670000	70680000		chr10	12760000	12770000	chr10	13110000	13120000		chr10	24930000	24940000	chr10	25360000	25370000		chr10	114320000	114330000	chr10	114690000	114700000
	chr10	6710000	6720000	chr10	7150000	7160000		chr10	67990000	68000000	chr10	68390000	68400000		chr10	21360000	21370000	chr10	22240000	22250000		chr10	73360000	73370000	chr10	73550000	73560000		chr10	12760000	12770000	chr10	12940000	12950000		chr10	24930000	24940000	chr10	25230000	25240000		chr10	114300000	114310000	chr10	115150000	115160000
	chr10	6710000	6720000	chr10	7320000	7330000		chr10	67950000	67960000	chr10	68380000	68390000		chr10	21450000	21460000	chr10	22240000	22250000		chr10	126750000	126760000	chr10	127030000	127040000		chr10	112400000	112410000	chr10	112480000	112490000		chr10	24930000	24940000	chr10	25010000	25020000		chr10	7560000	7570000	chr10	7790000	7800000
	chr10	6710000	6720000	chr10	7260000	7270000		chr10	9020000	9030000	chr10	9240000	9250000		chr10	21370000	21380000	chr10	21460000	21470000		chr10	126750000	126760000	chr10	126840000	126850000		chr10	112360000	112370000	chr10	112650000	112660000		chr10	31480000	31490000	chr10	31760000	31770000		chr10	7570000	7580000	chr10	7720000	7730000
	chr10	6710000	6720000	chr10	6790000	6800000		chr10	9040000	9050000	chr10	9320000	9330000		chr10	21360000	21370000	chr10	21550000	21560000		chr10	126740000	126750000	chr10	127400000	127410000		chr10	112420000	112430000	chr10	112650000	112660000		chr10	48430000	48440000	chr10	48620000	48630000		chr10	470000	480000	chr10	830000	840000
	chr10	28350000	28360000	chr10	28680000	28690000		chr10	27840000	27850000	chr10	28530000	28540000		chr10	21460000	21470000	chr10	21550000	21560000		chr10	60070000	60080000	chr10	60240000	60250000		chr10	73370000	73380000	chr10	73450000	73460000		chr10	32230000	32240000	chr10	32490000	32500000		chr10	70140000	70150000	chr10	70530000	70540000
	chr10	105360000	105370000	chr10	105630000	105640000		chr10	27850000	27860000	chr10	28460000	28470000		chr10	21360000	21370000	chr10	22030000	22040000		chr10	60060000	60070000	chr10	60280000	60290000		chr10	73450000	73460000	chr10	73530000	73540000		chr10	63700000	63710000	chr10	64000000	64010000		chr10	70120000	70130000	chr10	70700000	70710000
	chr10	105360000	105370000	chr10	105440000	105450000		chr10	27840000	27850000	chr10	27940000	27950000		chr10	21360000	21370000	chr10	21780000	21790000		chr10	60060000	60070000	chr10	60340000	60350000		chr10	73390000	73400000	chr10	73560000	73570000		chr10	25010000	25020000	chr10	25120000	25130000		chr10	122840000	122850000	chr10	123350000	123360000
	chr10	91000000	91010000	chr10	91420000	91430000		chr10	27840000	27850000	chr10	28670000	28680000		chr10	21460000	21470000	chr10	21810000	21820000		chr10	60050000	60060000	chr10	60140000	60150000		chr10	73470000	73480000	chr10	73640000	73650000		chr10	25010000	25020000	chr10	25350000	25360000		chr10	30020000	30030000	chr10	30140000	30150000
	chr10	91020000	91030000	chr10	91120000	91130000		chr10	126210000	126220000	chr10	126510000	126520000		chr10	60710000	60720000	chr10	61230000	61240000		chr10	122700000	122710000	chr10	123240000	123250000		chr10	37780000	37790000	chr10	38040000	38050000		chr10	25000000	25010000	chr10	25240000	25250000		chr10	116310000	116320000	chr10	116540000	116550000
	chr10	91010000	91020000	chr10	91310000	91320000		chr10	126220000	126230000	chr10	126430000	126440000		chr10	60710000	60720000	chr10	60940000	60950000		chr10	122730000	122740000	chr10	122820000	122830000		chr10	80830000	80840000	chr10	80910000	80920000		chr10	25010000	25020000	chr10	25300000	25310000		chr10	116310000	116320000	chr10	116640000	116650000
	chr10	97780000	97790000	chr10	98060000	98070000		chr10	126220000	126230000	chr10	126640000	126650000		chr10	60720000	60730000	chr10	61360000	61370000		chr10	122700000	122710000	chr10	122830000	122840000		chr10	116900000	116910000	chr10	118140000	118150000		chr10	13410000	13420000	chr10	13570000	13580000		chr10	116310000	116320000	chr10	116460000	116470000
	chr10	97770000	97780000	chr10	97960000	97970000		chr10	126210000	126220000	chr10	127060000	127070000		chr10	26620000	26630000	chr10	27170000	27180000		chr10	122700000	122710000	chr10	123640000	123650000		chr10	116930000	116940000	chr10	117180000	117190000		chr10	118970000	118980000	chr10	119060000	119070000		chr10	3580000	3590000	chr10	3810000	3820000
	chr10	97810000	97820000	chr10	97890000	97900000		chr10	38140000	38150000	chr10	38250000	38260000		chr10	26620000	26630000	chr10	26840000	26850000		chr10	122700000	122710000	chr10	123480000	123490000		chr10	4100000	4110000	chr10	4700000	4710000		chr10	118970000	118980000	chr10	119220000	119230000		chr10	4090000	4100000	chr10	4700000	4710000
	chr10	54590000	54600000	chr10	54690000	54700000		chr10	38140000	38150000	chr10	38650000	38660000		chr10	26620000	26630000	chr10	26960000	26970000		chr10	122710000	122720000	chr10	123070000	123080000		chr10	4100000	4110000	chr10	4810000	4820000		chr10	101600000	101610000	chr10	101800000	101810000		chr10	107710000	107720000	chr10	107930000	107940000
	chr10	54570000	54580000	chr10	55330000	55340000		chr10	65100000	65110000	chr10	65380000	65390000		chr10	88920000	88930000	chr10	89170000	89180000		chr10	102800000	102810000	chr10	102890000	102900000		chr10	4100000	4110000	chr10	4300000	4310000		chr10	70720000	70730000	chr10	71150000	71160000		chr10	101320000	101330000	chr10	101460000	101470000
	chr10	54570000	54580000	chr10	55140000	55150000		chr10	65120000	65130000	chr10	65470000	65480000		chr10	88940000	88950000	chr10	89480000	89490000		chr10	49420000	49430000	chr10	49710000	49720000		chr10	4090000	4100000	chr10	4390000	4400000		chr10	70760000	70770000	chr10	70960000	70970000		chr10	32730000	32740000	chr10	33290000	33300000
	chr10	125520000	125530000	chr10	125610000	125620000		chr10	5020000	5030000	chr10	5420000	5430000		chr10	32540000	32550000	chr10	32620000	32630000		chr10	17660000	17670000	chr10	17770000	17780000		chr10	119470000	119480000	chr10	120000000	120010000		chr10	70760000	70770000	chr10	70850000	70860000		chr10	73220000	73230000	chr10	73580000	73590000
	chr10	125500000	125510000	chr10	125710000	125720000		chr10	5050000	5060000	chr10	5130000	5140000		chr10	7730000	7740000	chr10	9340000	9350000		chr10	17640000	17650000	chr10	18400000	18410000		chr10	114250000	114260000	chr10	115280000	115290000		chr10	76870000	76880000	chr10	76990000	77000000		chr10	73240000	73250000	chr10	73450000	73460000
	chr10	125500000	125510000	chr10	126060000	126070000		chr10	5020000	5030000	chr10	5320000	5330000		chr10	114750000	114760000	chr10	115140000	115150000		chr10	17630000	17640000	chr10	18520000	18530000		chr10	114230000	114240000	chr10	115320000	115330000		chr10	7910000	7920000	chr10	9330000	9340000		chr10	73240000	73250000	chr10	73320000	73330000
	chr10	72320000	72330000	chr10	72510000	72520000		chr10	91710000	91720000	chr10	91890000	91900000		chr10	114650000	114660000	chr10	115140000	115150000		chr10	14250000	14260000	chr10	14520000	14530000		chr10	114250000	114260000	chr10	114700000	114710000		chr10	7910000	7920000	chr10	9250000	9260000		chr10	64380000	64390000	chr10	64570000	64580000
	chr10	72300000	72310000	chr10	72640000	72650000		chr10	91740000	91750000	chr10	92360000	92370000		chr10	114710000	114720000	chr10	114820000	114830000		chr10	99220000	99230000	chr10	99310000	99320000		chr10	114230000	114240000	chr10	115150000	115160000		chr10	7920000	7930000	chr10	8080000	8090000		chr10	74200000	74210000	chr10	74590000	74600000
	chr10	72310000	72320000	chr10	73020000	73030000		chr10	91710000	91720000	chr10	92410000	92420000		chr10	114710000	114720000	chr10	114880000	114890000		chr10	75530000	75540000	chr10	75850000	75860000		chr10	114240000	114250000	chr10	114870000	114880000		chr10	14050000	14060000	chr10	14130000	14140000		chr10	87300000	87310000	chr10	88130000	88140000
	chr10	72300000	72310000	chr10	72960000	72970000		chr10	91730000	91740000	chr10	92440000	92450000		chr10	96960000	96970000	chr10	97190000	97200000		chr10	28540000	28550000	chr10	28660000	28670000		chr10	55360000	55370000	chr10	55880000	55890000		chr10	90590000	90600000	chr10	90690000	90700000		chr10	43700000	43710000	chr10	43960000	43970000
	chr10	24680000	24690000	chr10	24790000	24800000		chr10	91710000	91720000	chr10	92500000	92510000		chr10	96880000	96890000	chr10	97210000	97220000		chr10	43240000	43250000	chr10	43600000	43610000		chr10	55360000	55370000	chr10	56160000	56170000		chr10	90590000	90600000	chr10	90970000	90980000		chr10	43620000	43630000	chr10	43950000	43960000
	chr10	134470000	134480000	chr10	134560000	134570000		chr10	121980000	121990000	chr10	122230000	122240000		chr10	96960000	96970000	chr10	97360000	97370000		chr10	94640000	94650000	chr10	95040000	95050000		chr10	54970000	54980000	chr10	55340000	55350000		chr10	22620000	22630000	chr10	22970000	22980000		chr10	43630000	43640000	chr10	43850000	43860000
	chr10	134460000	134470000	chr10	134700000	134710000		chr10	121980000	121990000	chr10	122480000	122490000		chr10	97000000	97010000	chr10	97120000	97130000		chr10	94660000	94670000	chr10	95290000	95300000		chr10	54960000	54970000	chr10	56160000	56170000		chr10	22610000	22620000	chr10	22930000	22940000		chr10	124890000	124900000	chr10	125140000	125150000
	chr10	134480000	134490000	chr10	134920000	134930000		chr10	121980000	121990000	chr10	122090000	122100000		chr10	96890000	96900000	chr10	97120000	97130000		chr10	124230000	124240000	chr10	124320000	124330000		chr10	15470000	15480000	chr10	15760000	15770000		chr10	22610000	22620000	chr10	22790000	22800000		chr10	124890000	124900000	chr10	125310000	125320000
	chr10	72570000	72580000	chr10	72650000	72660000		chr10	123740000	123750000	chr10	124040000	124050000		chr10	96910000	96920000	chr10	97580000	97590000		chr10	52030000	52040000	chr10	52390000	52400000		chr10	91020000	91030000	chr10	91130000	91140000		chr10	22610000	22620000	chr10	22820000	22830000		chr10	49740000	49750000	chr10	50370000	50380000
	chr10	72560000	72570000	chr10	73040000	73050000		chr10	123700000	123710000	chr10	123970000	123980000		chr10	103280000	103290000	chr10	103520000	103530000		chr10	4250000	4260000	chr10	4460000	4470000		chr10	91020000	91030000	chr10	91320000	91330000		chr10	22600000	22610000	chr10	22710000	22720000		chr10	49750000	49760000	chr10	50060000	50070000
	chr10	35620000	35630000	chr10	35770000	35780000		chr10	123680000	123690000	chr10	123810000	123820000		chr10	103220000	103230000	chr10	103300000	103310000		chr10	4260000	4270000	chr10	4800000	4810000		chr10	53180000	53190000	chr10	53720000	53730000		chr10	22640000	22650000	chr10	23270000	23280000		chr10	49760000	49770000	chr10	49860000	49870000
	chr10	35630000	35640000	chr10	35870000	35880000		chr10	123730000	123740000	chr10	123880000	123890000		chr10	103240000	103250000	chr10	103850000	103860000		chr10	11340000	11350000	chr10	11790000	11800000		chr10	14990000	15000000	chr10	15140000	15150000		chr10	28720000	28730000	chr10	28910000	28920000		chr10	49740000	49750000	chr10	49970000	49980000
	chr10	35630000	35640000	chr10	35710000	35720000		chr10	65850000	65860000	chr10	66050000	66060000		chr10	111640000	111650000	chr10	111730000	111740000		chr10	122910000	122920000	chr10	123390000	123400000		chr10	14920000	14930000	chr10	15000000	15010000		chr10	62890000	62900000	chr10	63030000	63040000		chr10	116460000	116470000	chr10	116540000	116550000
	chr10	79990000	80000000	chr10	80410000	80420000		chr10	65820000	65830000	chr10	66400000	66410000		chr10	111640000	111650000	chr10	111890000	111900000		chr10	122920000	122930000	chr10	123490000	123500000		chr10	13140000	13150000	chr10	13350000	13360000		chr10	62900000	62910000	chr10	63590000	63600000		chr10	10860000	10870000	chr10	11070000	11080000
	chr10	79960000	79970000	chr10	80960000	80970000		chr10	65800000	65810000	chr10	66480000	66490000		chr10	111650000	111660000	chr10	112340000	112350000		chr10	93510000	93520000	chr10	93670000	93680000		chr10	30290000	30300000	chr10	30530000	30540000		chr10	62900000	62910000	chr10	63510000	63520000		chr10	111890000	111900000	chr10	112330000	112340000
	chr10	79940000	79950000	chr10	80800000	80810000		chr10	65860000	65870000	chr10	66130000	66140000		chr10	111640000	111650000	chr10	112040000	112050000		chr10	71170000	71180000	chr10	71480000	71490000		chr10	30280000	30290000	chr10	30880000	30890000		chr10	92660000	92670000	chr10	93020000	93030000		chr10	111890000	111900000	chr10	112030000	112040000
	chr10	4210000	4220000	chr10	4810000	4820000		chr10	65800000	65810000	chr10	66130000	66140000		chr10	111640000	111650000	chr10	111980000	111990000		chr10	71170000	71180000	chr10	71390000	71400000		chr10	30280000	30290000	chr10	30670000	30680000		chr10	29810000	29820000	chr10	30020000	30030000		chr10	22520000	22530000	chr10	23280000	23290000
	chr10	29930000	29940000	chr10	30010000	30020000		chr10	65790000	65800000	chr10	66720000	66730000		chr10	93450000	93460000	chr10	93670000	93680000		chr10	71170000	71180000	chr10	71260000	71270000		chr10	29660000	29670000	chr10	29790000	29800000		chr10	103030000	103040000	chr10	103320000	103330000		chr10	22510000	22520000	chr10	22600000	22610000
	chr10	29930000	29940000	chr10	30270000	30280000		chr10	118280000	118290000	chr10	118930000	118940000		chr10	97130000	97140000	chr10	97210000	97220000		chr10	86130000	86140000	chr10	86290000	86300000		chr10	114340000	114350000	chr10	114730000	114740000		chr10	103030000	103040000	chr10	103190000	103200000		chr10	65040000	65050000	chr10	65130000	65140000
	chr10	4870000	4880000	chr10	5150000	5160000		chr10	118220000	118230000	chr10	118940000	118950000		chr10	97130000	97140000	chr10	97360000	97370000		chr10	101190000	101200000	chr10	101470000	101480000		chr10	114320000	114330000	chr10	114690000	114700000		chr10	35020000	35030000	chr10	35100000	35110000		chr10	64970000	64980000	chr10	65140000	65150000
	chr10	4870000	4880000	chr10	5690000	5700000		chr10	118200000	118210000	chr10	118350000	118360000		chr10	97130000	97140000	chr10	97600000	97610000		chr10	101190000	101200000	chr10	101370000	101380000		chr10	114320000	114330000	chr10	114550000	114560000		chr10	34950000	34960000	chr10	35100000	35110000		chr10	64920000	64930000	chr10	65480000	65490000
	chr10	4850000	4860000	chr10	5600000	5610000		chr10	118280000	118290000	chr10	118550000	118560000		chr10	32690000	32700000	chr10	33010000	33020000		chr10	63060000	63070000	chr10	63470000	63480000		chr10	114310000	114320000	chr10	115140000	115150000		chr10	35010000	35020000	chr10	35260000	35270000		chr10	65010000	65020000	chr10	65470000	65480000
	chr10	4850000	4860000	chr10	5470000	5480000		chr10	64570000	64580000	chr10	64760000	64770000		chr10	32660000	32670000	chr10	33240000	33250000		chr10	105650000	105660000	chr10	106000000	106010000		chr10	114300000	114310000	chr10	114790000	114800000		chr10	30300000	30310000	chr10	30650000	30660000		chr10	64980000	64990000	chr10	65280000	65290000
	chr10	4890000	4900000	chr10	5010000	5020000		chr10	64580000	64590000	chr10	64850000	64860000		chr10	32670000	32680000	chr10	33140000	33150000		chr10	105650000	105660000	chr10	105840000	105850000		chr10	114320000	114330000	chr10	114880000	114890000		chr10	30320000	30330000	chr10	30470000	30480000		chr10	64960000	64970000	chr10	65380000	65390000
	chr10	4860000	4870000	chr10	5360000	5370000		chr10	4210000	4220000	chr10	4690000	4700000		chr10	76490000	76500000	chr10	76770000	76780000		chr10	105650000	105660000	chr10	105730000	105740000		chr10	95130000	95140000	chr10	95440000	95450000		chr10	13700000	13710000	chr10	13820000	13830000		chr10	64970000	64980000	chr10	65220000	65230000
	chr10	4880000	4890000	chr10	5280000	5290000		chr10	4230000	4240000	chr10	4500000	4510000		chr10	76450000	76460000	chr10	76770000	76780000		chr10	79960000	79970000	chr10	80420000	80430000		chr10	95130000	95140000	chr10	95240000	95250000		chr10	13830000	13840000	chr10	14120000	14130000		chr10	65030000	65040000	chr10	65220000	65230000
	chr10	134190000	134200000	chr10	134340000	134350000		chr10	4210000	4220000	chr10	4810000	4820000		chr10	76530000	76540000	chr10	76850000	76860000		chr10	79980000	79990000	chr10	80950000	80960000		chr10	98390000	98400000	chr10	98790000	98800000		chr10	13820000	13830000	chr10	14520000	14530000		chr10	99670000	99680000	chr10	99790000	99800000
	chr10	134180000	134190000	chr10	134260000	134270000		chr10	4210000	4220000	chr10	4400000	4410000		chr10	27440000	27450000	chr10	27520000	27530000		chr10	75280000	75290000	chr10	75480000	75490000		chr10	98400000	98410000	chr10	98480000	98490000		chr10	13830000	13840000	chr10	14210000	14220000		chr10	99660000	99670000	chr10	100060000	100070000
	chr10	134170000	134180000	chr10	134440000	134450000		chr10	29340000	29350000	chr10	29590000	29600000		chr10	27440000	27450000	chr10	27800000	27810000		chr10	75280000	75290000	chr10	75400000	75410000		chr10	98400000	98410000	chr10	98580000	98590000		chr10	72680000	72690000	chr10	72960000	72970000		chr10	74010000	74020000	chr10	74090000	74100000
	chr10	123280000	123290000	chr10	123650000	123660000		chr10	29280000	29290000	chr10	29590000	29600000		chr10	27440000	27450000	chr10	27650000	27660000		chr10	125340000	125350000	chr10	126060000	126070000		chr10	23440000	23450000	chr10	23990000	24000000		chr10	49570000	49580000	chr10	49860000	49870000		chr10	123370000	123380000	chr10	123490000	123500000
	chr10	123250000	123260000	chr10	123340000	123350000		chr10	29300000	29310000	chr10	29390000	29400000		chr10	89950000	89960000	chr10	90530000	90540000		chr10	125340000	125350000	chr10	125720000	125730000		chr10	23440000	23450000	chr10	24840000	24850000		chr10	124890000	124900000	chr10	125300000	125310000		chr10	123370000	123380000	chr10	123660000	123670000
	chr10	123280000	123290000	chr10	123370000	123380000		chr10	78180000	78190000	chr10	78300000	78310000		chr10	89880000	89890000	chr10	90310000	90320000		chr10	125340000	125350000	chr10	125640000	125650000		chr10	23440000	23450000	chr10	23820000	23830000		chr10	124880000	124890000	chr10	125130000	125140000		chr10	6050000	6060000	chr10	6230000	6240000
	chr10	123210000	123220000	chr10	123350000	123360000		chr10	78170000	78180000	chr10	78760000	78770000		chr10	89970000	89980000	chr10	90290000	90300000		chr10	104480000	104490000	chr10	104820000	104830000		chr10	76430000	76440000	chr10	76780000	76790000		chr10	22920000	22930000	chr10	23000000	23010000		chr10	6050000	6060000	chr10	6130000	6140000
	chr10	123280000	123290000	chr10	123460000	123470000		chr10	61980000	61990000	chr10	62400000	62410000		chr10	89950000	89960000	chr10	90380000	90390000		chr10	104460000	104470000	chr10	105090000	105100000		chr10	114090000	114100000	chr10	114190000	114200000		chr10	22860000	22870000	chr10	23270000	23280000		chr10	6060000	6070000	chr10	6440000	6450000
	chr10	12800000	12810000	chr10	12940000	12950000		chr10	61990000	62000000	chr10	62520000	62530000		chr10	89890000	89900000	chr10	90140000	90150000		chr10	104490000	104500000	chr10	104590000	104600000		chr10	134340000	134350000	chr10	134440000	134450000		chr10	22950000	22960000	chr10	23270000	23280000		chr10	72550000	72560000	chr10	72630000	72640000
	chr10	12750000	12760000	chr10	13130000	13140000		chr10	62000000	62010000	chr10	62190000	62200000		chr10	91550000	91560000	chr10	92030000	92040000		chr10	105360000	105370000	chr10	105440000	105450000		chr10	35010000	35020000	chr10	35260000	35270000		chr10	22920000	22930000	chr10	23110000	23120000		chr10	134480000	134490000	chr10	134720000	134730000
	chr10	12840000	12850000	chr10	13110000	13120000		chr10	61980000	61990000	chr10	62290000	62300000		chr10	91550000	91560000	chr10	91710000	91720000		chr10	105360000	105370000	chr10	105620000	105630000		chr10	34950000	34960000	chr10	35180000	35190000		chr10	74000000	74010000	chr10	74090000	74100000		chr10	33080000	33090000	chr10	33290000	33300000
	chr10	126320000	126330000	chr10	126430000	126440000		chr10	128040000	128050000	chr10	128280000	128290000		chr10	91550000	91560000	chr10	92260000	92270000		chr10	79680000	79690000	chr10	79770000	79780000		chr10	35020000	35030000	chr10	35100000	35110000		chr10	122700000	122710000	chr10	123480000	123490000		chr10	33080000	33090000	chr10	33440000	33450000
	chr10	3830000	3840000	chr10	4320000	4330000		chr10	128040000	128050000	chr10	128460000	128470000		chr10	91550000	91560000	chr10	92620000	92630000		chr10	78320000	78330000	chr10	78750000	78760000		chr10	34940000	34950000	chr10	35090000	35100000		chr10	122700000	122710000	chr10	123640000	123650000		chr10	61590000	61600000	chr10	61670000	61680000
	chr10	3840000	3850000	chr10	3920000	3930000		chr10	128080000	128090000	chr10	128180000	128190000		chr10	91550000	91560000	chr10	92340000	92350000		chr10	76330000	76340000	chr10	76490000	76500000		chr10	69610000	69620000	chr10	70060000	70070000		chr10	122700000	122710000	chr10	123340000	123350000		chr10	61590000	61600000	chr10	61790000	61800000
	chr10	3840000	3850000	chr10	4250000	4260000		chr10	79810000	79820000	chr10	80050000	80060000		chr10	91550000	91560000	chr10	91890000	91900000		chr10	106170000	106180000	chr10	106380000	106390000		chr10	69610000	69620000	chr10	69910000	69920000		chr10	122710000	122720000	chr10	122910000	122920000		chr10	35010000	35020000	chr10	35100000	35110000
	chr10	3800000	3810000	chr10	4700000	4710000		chr10	79800000	79810000	chr10	79920000	79930000		chr10	91550000	91560000	chr10	92500000	92510000		chr10	62570000	62580000	chr10	62700000	62710000		chr10	69620000	69630000	chr10	70000000	70010000		chr10	116300000	116310000	chr10	116540000	116550000		chr10	35010000	35020000	chr10	35260000	35270000
	chr10	3910000	3920000	chr10	4690000	4700000		chr10	79810000	79820000	chr10	80430000	80440000		chr10	117720000	117730000	chr10	118140000	118150000		chr10	62590000	62600000	chr10	63040000	63050000		chr10	69630000	69640000	chr10	69790000	69800000		chr10	116310000	116320000	chr10	116450000	116460000		chr10	35020000	35030000	chr10	35300000	35310000
	chr10	3830000	3840000	chr10	4100000	4110000		chr10	79810000	79820000	chr10	80340000	80350000		chr10	117730000	117740000	chr10	118020000	118030000		chr10	73810000	73820000	chr10	74090000	74100000		chr10	60180000	60190000	chr10	60420000	60430000		chr10	116320000	116330000	chr10	116400000	116410000		chr10	44400000	44410000	chr10	44880000	44890000
	chr10	3850000	3860000	chr10	4160000	4170000		chr10	79810000	79820000	chr10	80150000	80160000		chr10	35280000	35290000	chr10	35650000	35660000		chr10	73810000	73820000	chr10	73980000	73990000		chr10	60180000	60190000	chr10	60280000	60290000		chr10	29280000	29290000	chr10	29590000	29600000		chr10	44390000	44400000	chr10	44790000	44800000
	chr10	3830000	3840000	chr10	4190000	4200000		chr10	79810000	79820000	chr10	80210000	80220000		chr10	35280000	35290000	chr10	35370000	35380000		chr10	101490000	101500000	chr10	101800000	101810000		chr10	60170000	60180000	chr10	60700000	60710000		chr10	29280000	29290000	chr10	29410000	29420000		chr10	89790000	89800000	chr10	90140000	90150000
	chr10	3870000	3880000	chr10	4810000	4820000		chr10	79810000	79820000	chr10	80970000	80980000		chr10	35280000	35290000	chr10	35500000	35510000		chr10	101490000	101500000	chr10	101950000	101960000		chr10	60150000	60160000	chr10	60510000	60520000		chr10	111750000	111760000	chr10	112030000	112040000		chr10	16080000	16090000	chr10	16570000	16580000
	chr10	3830000	3840000	chr10	4510000	4520000		chr10	134270000	134280000	chr10	134450000	134460000		chr10	27150000	27160000	chr10	27520000	27530000		chr10	101490000	101500000	chr10	101570000	101580000		chr10	104480000	104490000	chr10	104810000	104820000		chr10	111770000	111780000	chr10	111860000	111870000		chr10	27730000	27740000	chr10	27940000	27950000
	chr10	118450000	118460000	chr10	118540000	118550000		chr10	134270000	134280000	chr10	134690000	134700000		chr10	27180000	27190000	chr10	27370000	27380000		chr10	120960000	120970000	chr10	121200000	121210000		chr10	104500000	104510000	chr10	104580000	104590000		chr10	21570000	21580000	chr10	22220000	22230000		chr10	27730000	27740000	chr10	28530000	28540000
	chr10	118440000	118450000	chr10	118940000	118950000		chr10	98830000	98840000	chr10	99120000	99130000		chr10	27180000	27190000	chr10	27640000	27650000		chr10	120950000	120960000	chr10	121280000	121290000		chr10	104480000	104490000	chr10	105020000	105030000		chr10	21560000	21570000	chr10	21780000	21790000		chr10	27740000	27750000	chr10	28680000	28690000
	chr10	118430000	118440000	chr10	118840000	118850000		chr10	98830000	98840000	chr10	98960000	98970000		chr10	23440000	23450000	chr10	24480000	24490000		chr10	73990000	74000000	chr10	74080000	74090000		chr10	123360000	123370000	chr10	123640000	123650000		chr10	21570000	21580000	chr10	22010000	22020000		chr10	27730000	27740000	chr10	27830000	27840000
	chr10	118430000	118440000	chr10	118720000	118730000		chr10	87310000	87320000	chr10	87740000	87750000		chr10	23440000	23450000	chr10	23990000	24000000		chr10	123830000	123840000	chr10	124210000	124220000		chr10	122700000	122710000	chr10	123490000	123500000		chr10	112070000	112080000	chr10	112300000	112310000		chr10	27730000	27740000	chr10	28480000	28490000
	chr10	5840000	5850000	chr10	5920000	5930000		chr10	87310000	87320000	chr10	87550000	87560000		chr10	23430000	23440000	chr10	23920000	23930000		chr10	123800000	123810000	chr10	123880000	123890000		chr10	122700000	122710000	chr10	123360000	123370000		chr10	49760000	49770000	chr10	49860000	49870000		chr10	35400000	35410000	chr10	35630000	35640000
	chr10	34950000	34960000	chr10	35360000	35370000		chr10	87300000	87310000	chr10	87660000	87670000		chr10	23440000	23450000	chr10	24840000	24850000		chr10	123800000	123810000	chr10	124010000	124020000		chr10	122700000	122710000	chr10	123640000	123650000		chr10	6330000	6340000	chr10	6440000	6450000		chr10	35390000	35400000	chr10	35840000	35850000
	chr10	34950000	34960000	chr10	35240000	35250000		chr10	115720000	115730000	chr10	116040000	116050000		chr10	23440000	23450000	chr10	23810000	23820000		chr10	88730000	88740000	chr10	88850000	88860000		chr10	122730000	122740000	chr10	123080000	123090000		chr10	105250000	105260000	chr10	105340000	105350000		chr10	35410000	35420000	chr10	35500000	35510000
	chr10	35000000	35010000	chr10	35270000	35280000		chr10	115740000	115750000	chr10	115840000	115850000		chr10	23440000	23450000	chr10	23580000	23590000		chr10	91700000	91710000	chr10	92340000	92350000		chr10	6460000	6470000	chr10	6710000	6720000		chr10	29910000	29920000	chr10	30000000	30010000		chr10	29280000	29290000	chr10	29580000	29590000
	chr10	35010000	35020000	chr10	35090000	35100000		chr10	28220000	28230000	chr10	28450000	28460000		chr10	42680000	42690000	chr10	42920000	42930000		chr10	17340000	17350000	chr10	17430000	17440000		chr10	6470000	6480000	chr10	7460000	7470000		chr10	29910000	29920000	chr10	30120000	30130000		chr10	91180000	91190000	chr10	91460000	91470000
	chr10	34960000	34970000	chr10	35110000	35120000		chr10	28230000	28240000	chr10	28520000	28530000		chr10	42670000	42680000	chr10	42760000	42770000		chr10	134480000	134490000	chr10	134940000	134950000		chr10	115460000	115470000	chr10	115860000	115870000		chr10	29100000	29110000	chr10	29410000	29420000		chr10	91180000	91190000	chr10	91320000	91330000
	chr10	75170000	75180000	chr10	75250000	75260000		chr10	28210000	28220000	chr10	28670000	28680000		chr10	42680000	42690000	chr10	43590000	43600000		chr10	134480000	134490000	chr10	134700000	134710000		chr10	60530000	60540000	chr10	60940000	60950000		chr10	98390000	98400000	chr10	98580000	98590000		chr10	100000000	100010000	chr10	100160000	100170000
	chr10	75160000	75170000	chr10	75400000	75410000		chr10	97990000	98000000	chr10	98770000	98780000		chr10	76680000	76690000	chr10	76990000	77000000		chr10	13820000	13830000	chr10	14220000	14230000		chr10	60540000	60550000	chr10	61370000	61380000		chr10	98400000	98410000	chr10	98780000	98790000		chr10	100000000	100010000	chr10	100080000	100090000
	chr10	125040000	125050000	chr10	125140000	125150000		chr10	97980000	97990000	chr10	98060000	98070000		chr10	76640000	76650000	chr10	76760000	76770000		chr10	13830000	13840000	chr10	14130000	14140000		chr10	100220000	100230000	chr10	100420000	100430000		chr10	11480000	11490000	chr10	11780000	11790000		chr10	89610000	89620000	chr10	89870000	89880000
	chr10	125050000	125060000	chr10	125290000	125300000		chr10	98020000	98030000	chr10	98670000	98680000		chr10	76650000	76660000	chr10	76840000	76850000		chr10	105470000	105480000	chr10	105960000	105970000		chr10	100240000	100250000	chr10	100810000	100820000		chr10	8660000	8670000	chr10	8900000	8910000		chr10	89610000	89620000	chr10	90310000	90320000
	chr10	125970000	125980000	chr10	126060000	126070000		chr10	97990000	98000000	chr10	98960000	98970000		chr10	126330000	126340000	chr10	126420000	126430000		chr10	105480000	105490000	chr10	106030000	106040000		chr10	100220000	100230000	chr10	101010000	101020000		chr10	104140000	104150000	chr10	104240000	104250000		chr10	89710000	89720000	chr10	90300000	90310000
	chr10	117010000	117020000	chr10	117330000	117340000		chr10	68560000	68570000	chr10	68680000	68690000		chr10	27840000	27850000	chr10	28680000	28690000		chr10	105470000	105480000	chr10	105610000	105620000		chr10	93310000	93320000	chr10	93500000	93510000		chr10	125340000	125350000	chr10	125720000	125730000		chr10	89610000	89620000	chr10	90060000	90070000
	chr10	117000000	117010000	chr10	117080000	117090000		chr10	68570000	68580000	chr10	69270000	69280000		chr10	27850000	27860000	chr10	28010000	28020000		chr10	105460000	105470000	chr10	105740000	105750000		chr10	93310000	93320000	chr10	93450000	93460000		chr10	125330000	125340000	chr10	126080000	126090000		chr10	89620000	89630000	chr10	90140000	90150000
	chr10	60170000	60180000	chr10	60270000	60280000		chr10	8400000	8410000	chr10	8810000	8820000		chr10	27840000	27850000	chr10	27940000	27950000		chr10	33620000	33630000	chr10	34920000	34930000		chr10	93310000	93320000	chr10	93390000	93400000		chr10	3280000	3290000	chr10	4810000	4820000		chr10	105460000	105470000	chr10	105800000	105810000
	chr10	60170000	60180000	chr10	60670000	60680000		chr10	8440000	8450000	chr10	8740000	8750000		chr10	27860000	27870000	chr10	28230000	28240000		chr10	33630000	33640000	chr10	34220000	34230000		chr10	5670000	5680000	chr10	5910000	5920000		chr10	3280000	3290000	chr10	3580000	3590000		chr10	105470000	105480000	chr10	105610000	105620000
	chr10	60170000	60180000	chr10	60530000	60540000		chr10	8400000	8410000	chr10	8910000	8920000		chr10	27850000	27860000	chr10	28520000	28530000		chr10	64760000	64770000	chr10	64900000	64910000		chr10	5730000	5740000	chr10	5810000	5820000		chr10	3280000	3290000	chr10	3690000	3700000		chr10	105470000	105480000	chr10	105970000	105980000
	chr10	60180000	60190000	chr10	60390000	60400000		chr10	8440000	8450000	chr10	8630000	8640000		chr10	27840000	27850000	chr10	28460000	28470000		chr10	114310000	114320000	chr10	114900000	114910000		chr10	35100000	35110000	chr10	35180000	35190000		chr10	3270000	3280000	chr10	3990000	4000000		chr10	104250000	104260000	chr10	104340000	104350000
	chr10	121510000	121520000	chr10	121590000	121600000		chr10	8410000	8420000	chr10	8670000	8680000		chr10	44740000	44750000	chr10	44850000	44860000		chr10	114330000	114340000	chr10	114710000	114720000		chr10	94650000	94660000	chr10	95110000	95120000		chr10	3280000	3290000	chr10	4100000	4110000		chr10	104260000	104270000	chr10	104430000	104440000
	chr10	1460000	1470000	chr10	1610000	1620000		chr10	730000	740000	chr10	820000	830000		chr10	23820000	23830000	chr10	23990000	24000000		chr10	114320000	114330000	chr10	115130000	115140000		chr10	94650000	94660000	chr10	95260000	95270000		chr10	3280000	3290000	chr10	3500000	3510000		chr10	5720000	5730000	chr10	5930000	5940000
	chr10	1460000	1470000	chr10	1680000	1690000		chr10	24380000	24390000	chr10	24850000	24860000		chr10	23810000	23820000	chr10	24830000	24840000		chr10	5720000	5730000	chr10	5930000	5940000		chr10	81810000	81820000	chr10	81890000	81900000		chr10	3280000	3290000	chr10	3820000	3830000		chr10	5720000	5730000	chr10	5810000	5820000
	chr10	114320000	114330000	chr10	114700000	114710000		chr10	24390000	24400000	chr10	24800000	24810000		chr10	82450000	82460000	chr10	82680000	82690000		chr10	5730000	5740000	chr10	5830000	5840000		chr10	50360000	50370000	chr10	50700000	50710000		chr10	3260000	3270000	chr10	4690000	4700000		chr10	91020000	91030000	chr10	91120000	91130000
	chr10	114230000	114240000	chr10	114680000	114690000		chr10	24350000	24360000	chr10	24650000	24660000		chr10	82460000	82470000	chr10	82770000	82780000		chr10	5670000	5680000	chr10	6120000	6130000		chr10	50390000	50400000	chr10	50600000	50610000		chr10	27730000	27740000	chr10	28020000	28030000		chr10	91020000	91030000	chr10	91320000	91330000
	chr10	114230000	114240000	chr10	115130000	115140000		chr10	77790000	77800000	chr10	78300000	78310000		chr10	19100000	19110000	chr10	19680000	19690000		chr10	24690000	24700000	chr10	24780000	24790000		chr10	91560000	91570000	chr10	92620000	92630000		chr10	27730000	27740000	chr10	27920000	27930000		chr10	122690000	122700000	chr10	123490000	123500000
	chr10	114250000	114260000	chr10	115270000	115280000		chr10	77860000	77870000	chr10	78310000	78320000		chr10	19080000	19090000	chr10	20100000	20110000		chr10	123700000	123710000	chr10	123860000	123870000		chr10	91550000	91560000	chr10	92510000	92520000		chr10	27730000	27740000	chr10	28460000	28470000		chr10	122700000	122710000	chr10	123070000	123080000
	chr10	114250000	114260000	chr10	115310000	115320000		chr10	77800000	77810000	chr10	78060000	78070000		chr10	19080000	19090000	chr10	19300000	19310000		chr10	123730000	123740000	chr10	124010000	124020000		chr10	64380000	64390000	chr10	64580000	64590000		chr10	27440000	27450000	chr10	27640000	27650000		chr10	122700000	122710000	chr10	123640000	123650000
	chr10	114320000	114330000	chr10	114890000	114900000		chr10	77800000	77810000	chr10	78760000	78770000		chr10	62220000	62230000	chr10	62750000	62760000		chr10	100220000	100230000	chr10	100950000	100960000		chr10	77160000	77170000	chr10	77670000	77680000		chr10	97030000	97040000	chr10	97120000	97130000		chr10	122710000	122720000	chr10	123240000	123250000
	chr10	114240000	114250000	chr10	114900000	114910000		chr10	77860000	77870000	chr10	78730000	78740000		chr10	62200000	62210000	chr10	62400000	62410000		chr10	100210000	100220000	chr10	101000000	101010000		chr10	77160000	77170000	chr10	77790000	77800000		chr10	24530000	24540000	chr10	24640000	24650000		chr10	122700000	122710000	chr10	123350000	123360000
	chr10	125360000	125370000	chr10	125530000	125540000		chr10	125180000	125190000	chr10	125310000	125320000		chr10	62200000	62210000	chr10	62520000	62530000		chr10	100250000	100260000	chr10	100420000	100430000		chr10	77150000	77160000	chr10	78060000	78070000		chr10	24540000	24550000	chr10	24750000	24760000		chr10	63660000	63670000	chr10	63750000	63760000
	chr10	125350000	125360000	chr10	125980000	125990000		chr10	49400000	49410000	chr10	49820000	49830000		chr10	54240000	54250000	chr10	54320000	54330000		chr10	93050000	93060000	chr10	93310000	93320000		chr10	77150000	77160000	chr10	78300000	78310000		chr10	116650000	116660000	chr10	116890000	116900000		chr10	63790000	63800000	chr10	63940000	63950000
	chr10	125340000	125350000	chr10	125720000	125730000		chr10	49410000	49420000	chr10	49710000	49720000		chr10	54250000	54260000	chr10	54470000	54480000		chr10	93040000	93050000	chr10	93400000	93410000		chr10	123910000	123920000	chr10	124190000	124200000		chr10	8070000	8080000	chr10	9270000	9280000		chr10	63790000	63800000	chr10	64000000	64010000
	chr10	125340000	125350000	chr10	126070000	126080000		chr10	116460000	116470000	chr10	116880000	116890000		chr10	81690000	81700000	chr10	82000000	82010000		chr10	7720000	7730000	chr10	9330000	9340000		chr10	123910000	123920000	chr10	124320000	124330000		chr10	8090000	8100000	chr10	8660000	8670000		chr10	116640000	116650000	chr10	116880000	116890000
	chr10	125410000	125420000	chr10	126090000	126100000		chr10	116460000	116470000	chr10	116540000	116550000		chr10	81700000	81710000	chr10	81780000	81790000		chr10	64250000	64260000	chr10	64830000	64840000		chr10	64340000	64350000	chr10	64840000	64850000		chr10	8100000	8110000	chr10	8400000	8410000		chr10	76770000	76780000	chr10	76850000	76860000
	chr10	125360000	125370000	chr10	125440000	125450000		chr10	72680000	72690000	chr10	72820000	72830000		chr10	81730000	81740000	chr10	81870000	81880000		chr10	64220000	64230000	chr10	64830000	64840000		chr10	64340000	64350000	chr10	64910000	64920000		chr10	8080000	8090000	chr10	8510000	8520000		chr10	76790000	76800000	chr10	76990000	77000000
	chr10	123350000	123360000	chr10	123640000	123650000		chr10	72660000	72670000	chr10	73040000	73050000		chr10	81670000	81680000	chr10	81870000	81880000		chr10	64250000	64260000	chr10	64910000	64920000		chr10	114890000	114900000	chr10	115280000	115290000		chr10	8090000	8100000	chr10	8910000	8920000		chr10	4400000	4410000	chr10	4700000	4710000
	chr10	123360000	123370000	chr10	123440000	123450000		chr10	72830000	72840000	chr10	73030000	73040000		chr10	15030000	15040000	chr10	15400000	15410000		chr10	64180000	64190000	chr10	64570000	64580000		chr10	114900000	114910000	chr10	115140000	115150000		chr10	31070000	31080000	chr10	32060000	32070000		chr10	64700000	64710000	chr10	64800000	64810000
	chr10	69290000	69300000	chr10	69530000	69540000		chr10	72680000	72690000	chr10	72970000	72980000		chr10	15000000	15010000	chr10	15120000	15130000		chr10	61380000	61390000	chr10	61550000	61560000		chr10	114870000	114880000	chr10	115200000	115210000		chr10	31060000	31070000	chr10	31600000	31610000		chr10	94340000	94350000	chr10	94630000	94640000
	chr10	115460000	115470000	chr10	115630000	115640000		chr10	72760000	72770000	chr10	72960000	72970000		chr10	29930000	29940000	chr10	30010000	30020000		chr10	61390000	61400000	chr10	62180000	62190000		chr10	97800000	97810000	chr10	97890000	97900000		chr10	31080000	31090000	chr10	31360000	31370000		chr10	65390000	65400000	chr10	65470000	65480000
	chr10	115470000	115480000	chr10	115870000	115880000		chr10	59350000	59360000	chr10	59700000	59710000		chr10	29810000	29820000	chr10	30020000	30030000		chr10	61360000	61370000	chr10	61970000	61980000		chr10	97760000	97770000	chr10	97890000	97900000		chr10	31080000	31090000	chr10	31330000	31340000		chr10	28960000	28970000	chr10	29280000	29290000
	chr10	115450000	115460000	chr10	115790000	115800000		chr10	59340000	59350000	chr10	59820000	59830000		chr10	29930000	29940000	chr10	30230000	30240000		chr10	61390000	61400000	chr10	61660000	61670000		chr10	97770000	97780000	chr10	98050000	98060000		chr10	31060000	31070000	chr10	31780000	31790000		chr10	28960000	28970000	chr10	29410000	29420000
	chr10	115460000	115470000	chr10	116010000	116020000		chr10	59470000	59480000	chr10	59820000	59830000		chr10	29800000	29810000	chr10	30280000	30290000		chr10	61390000	61400000	chr10	61790000	61800000		chr10	115680000	115690000	chr10	115860000	115870000		chr10	59930000	59940000	chr10	60140000	60150000		chr10	28910000	28920000	chr10	29750000	29760000
	chr10	115460000	115470000	chr10	115540000	115550000		chr10	59380000	59390000	chr10	59820000	59830000		chr10	29950000	29960000	chr10	30140000	30150000		chr10	65390000	65400000	chr10	65470000	65480000		chr10	13410000	13420000	chr10	13820000	13830000		chr10	59950000	59960000	chr10	60050000	60060000		chr10	28930000	28940000	chr10	29670000	29680000
	chr10	62610000	62620000	chr10	62880000	62890000		chr10	59340000	59350000	chr10	59910000	59920000		chr10	5330000	5340000	chr10	5420000	5430000		chr10	12650000	12660000	chr10	13120000	13130000		chr10	13390000	13400000	chr10	13480000	13490000		chr10	27850000	27860000	chr10	28030000	28040000		chr10	28950000	28960000	chr10	29590000	29600000
	chr10	62580000	62590000	chr10	63570000	63580000		chr10	59430000	59440000	chr10	59900000	59910000		chr10	5340000	5350000	chr10	5680000	5690000		chr10	62710000	62720000	chr10	62900000	62910000		chr10	13420000	13430000	chr10	13630000	13640000		chr10	27840000	27850000	chr10	28670000	28680000		chr10	28960000	28970000	chr10	29170000	29180000
	chr10	62550000	62560000	chr10	63470000	63480000		chr10	59330000	59340000	chr10	59410000	59420000		chr10	66730000	66740000	chr10	68380000	68390000		chr10	10430000	10440000	chr10	11070000	11080000		chr10	13410000	13420000	chr10	13560000	13570000		chr10	27850000	27860000	chr10	27940000	27950000		chr10	115460000	115470000	chr10	115560000	115570000
	chr10	62590000	62600000	chr10	62710000	62720000		chr10	59470000	59480000	chr10	59600000	59610000		chr10	66730000	66740000	chr10	67110000	67120000		chr10	134740000	134750000	chr10	135040000	135050000		chr10	4890000	4900000	chr10	5020000	5030000		chr10	27850000	27860000	chr10	28530000	28540000		chr10	115450000	115460000	chr10	115600000	115610000
	chr10	62580000	62590000	chr10	63040000	63050000		chr10	59440000	59450000	chr10	60040000	60050000		chr10	66720000	66730000	chr10	68690000	68700000		chr10	134740000	134750000	chr10	134930000	134940000		chr10	4860000	4870000	chr10	5670000	5680000		chr10	27830000	27840000	chr10	28470000	28480000		chr10	115550000	115560000	chr10	115670000	115680000
	chr10	62650000	62660000	chr10	63020000	63030000		chr10	3840000	3850000	chr10	4710000	4720000		chr10	66730000	66740000	chr10	67940000	67950000		chr10	47080000	47090000	chr10	47600000	47610000		chr10	4900000	4910000	chr10	5090000	5100000		chr10	44650000	44660000	chr10	44790000	44800000		chr10	115550000	115560000	chr10	115860000	115870000
	chr10	5380000	5390000	chr10	5660000	5670000		chr10	3840000	3850000	chr10	4080000	4090000		chr10	66730000	66740000	chr10	67870000	67880000		chr10	95660000	95670000	chr10	96050000	96060000		chr10	4890000	4900000	chr10	5420000	5430000		chr10	33080000	33090000	chr10	33290000	33300000		chr10	32210000	32220000	chr10	32290000	32300000
	chr10	5320000	5330000	chr10	5420000	5430000		chr10	3850000	3860000	chr10	3930000	3940000		chr10	114890000	114900000	chr10	115140000	115150000		chr10	63510000	63520000	chr10	63590000	63600000		chr10	4920000	4930000	chr10	5230000	5240000		chr10	33090000	33100000	chr10	33440000	33450000		chr10	102100000	102110000	chr10	102270000	102280000
	chr10	95750000	95760000	chr10	95840000	95850000		chr10	3810000	3820000	chr10	4170000	4180000		chr10	114910000	114920000	chr10	115320000	115330000		chr10	63490000	63500000	chr10	64000000	64010000		chr10	4890000	4900000	chr10	5320000	5330000		chr10	89620000	89630000	chr10	89700000	89710000		chr10	102090000	102100000	chr10	102190000	102200000
	chr10	22620000	22630000	chr10	22830000	22840000		chr10	3830000	3840000	chr10	4210000	4220000		chr10	61250000	61260000	chr10	61810000	61820000		chr10	63510000	63520000	chr10	63790000	63800000		chr10	4860000	4870000	chr10	5780000	5790000		chr10	54400000	54410000	chr10	54490000	54500000		chr10	6610000	6620000	chr10	6690000	6700000
	chr10	22640000	22650000	chr10	23320000	23330000		chr10	3830000	3840000	chr10	4280000	4290000		chr10	7910000	7920000	chr10	8680000	8690000		chr10	38250000	38260000	chr10	38390000	38400000		chr10	4570000	4580000	chr10	4680000	4690000		chr10	64020000	64030000	chr10	64130000	64140000		chr10	94450000	94460000	chr10	94630000	94640000
	chr10	95830000	95840000	chr10	96010000	96020000		chr10	3830000	3840000	chr10	4810000	4820000		chr10	7910000	7920000	chr10	8900000	8910000		chr10	38250000	38260000	chr10	38660000	38670000		chr10	4550000	4560000	chr10	4810000	4820000		chr10	45960000	45970000	chr10	46090000	46100000		chr10	119250000	119260000	chr10	120180000	120190000
	chr10	88350000	88360000	chr10	88440000	88450000		chr10	3810000	3820000	chr10	4400000	4410000		chr10	7920000	7930000	chr10	8860000	8870000		chr10	6610000	6620000	chr10	7460000	7470000		chr10	75260000	75270000	chr10	75490000	75500000		chr10	89620000	89630000	chr10	89840000	89850000		chr10	119170000	119180000	chr10	120180000	120190000
	chr10	88360000	88370000	chr10	88660000	88670000		chr10	3840000	3850000	chr10	4390000	4400000		chr10	7900000	7910000	chr10	9040000	9050000		chr10	6620000	6630000	chr10	6700000	6710000		chr10	75280000	75290000	chr10	75400000	75410000		chr10	102190000	102200000	chr10	102270000	102280000		chr10	119250000	119260000	chr10	120000000	120010000
	chr10	70550000	70560000	chr10	70640000	70650000		chr10	119620000	119630000	chr10	119870000	119880000		chr10	7910000	7920000	chr10	8480000	8490000		chr10	129700000	129710000	chr10	129940000	129950000		chr10	79800000	79810000	chr10	80950000	80960000		chr10	104900000	104910000	chr10	104990000	105000000		chr10	119260000	119270000	chr10	119860000	119870000
	chr10	126870000	126880000	chr10	127080000	127090000		chr10	119680000	119690000	chr10	119860000	119870000		chr10	7910000	7920000	chr10	9340000	9350000		chr10	129700000	129710000	chr10	129800000	129810000		chr10	79800000	79810000	chr10	80050000	80060000		chr10	114110000	114120000	chr10	114200000	114210000		chr10	90150000	90160000	chr10	90310000	90320000
	chr10	126820000	126830000	chr10	127400000	127410000		chr10	119620000	119630000	chr10	119990000	120000000		chr10	7910000	7920000	chr10	9100000	9110000		chr10	2970000	2980000	chr10	3200000	3210000		chr10	79800000	79810000	chr10	80830000	80840000		chr10	98400000	98410000	chr10	98480000	98490000		chr10	129700000	129710000	chr10	129800000	129810000
	chr10	126860000	126870000	chr10	127020000	127030000		chr10	129700000	129710000	chr10	129800000	129810000		chr10	7910000	7920000	chr10	9250000	9260000		chr10	2960000	2970000	chr10	3080000	3090000		chr10	79810000	79820000	chr10	80140000	80150000		chr10	48550000	48560000	chr10	48640000	48650000		chr10	81290000	81300000	chr10	81680000	81690000
	chr10	126850000	126860000	chr10	127300000	127310000		chr10	50090000	50100000	chr10	50370000	50380000		chr10	7940000	7950000	chr10	8020000	8030000		chr10	60170000	60180000	chr10	60260000	60270000		chr10	79810000	79820000	chr10	80210000	80220000		chr10	54070000	54080000	chr10	54210000	54220000		chr10	81290000	81300000	chr10	81800000	81810000
	chr10	119520000	119530000	chr10	120010000	120020000		chr10	50090000	50100000	chr10	50180000	50190000		chr10	120330000	120340000	chr10	120780000	120790000		chr10	60180000	60190000	chr10	60350000	60360000		chr10	79810000	79820000	chr10	80410000	80420000		chr10	43470000	43480000	chr10	43560000	43570000		chr10	81280000	81290000	chr10	81890000	81900000
	chr10	119500000	119510000	chr10	119860000	119870000		chr10	50090000	50100000	chr10	50620000	50630000		chr10	120320000	120330000	chr10	120840000	120850000		chr10	23600000	23610000	chr10	23810000	23820000		chr10	44170000	44180000	chr10	44790000	44800000		chr10	111830000	111840000	chr10	112040000	112050000		chr10	29820000	29830000	chr10	30020000	30030000
	chr10	119530000	119540000	chr10	119860000	119870000		chr10	50090000	50100000	chr10	50720000	50730000		chr10	120320000	120330000	chr10	120560000	120570000		chr10	23590000	23600000	chr10	23990000	24000000		chr10	44170000	44180000	chr10	44880000	44890000		chr10	90690000	90700000	chr10	90790000	90800000		chr10	29830000	29840000	chr10	30160000	30170000
	chr10	85890000	85900000	chr10	85970000	85980000		chr10	101660000	101670000	chr10	101760000	101770000		chr10	120320000	120330000	chr10	120470000	120480000		chr10	23630000	23640000	chr10	23720000	23730000		chr10	44180000	44190000	chr10	44380000	44390000		chr10	52180000	52190000	chr10	52260000	52270000		chr10	33620000	33630000	chr10	34920000	34930000
	chr10	61660000	61670000	chr10	61770000	61780000		chr10	101610000	101620000	chr10	101770000	101780000		chr10	120320000	120330000	chr10	120880000	120890000		chr10	114560000	114570000	chr10	114870000	114880000		chr10	44200000	44210000	chr10	44650000	44660000		chr10	69970000	69980000	chr10	70050000	70060000		chr10	33620000	33630000	chr10	34150000	34160000
	chr10	89870000	89880000	chr10	90140000	90150000		chr10	101650000	101660000	chr10	101800000	101810000		chr10	79800000	79810000	chr10	80830000	80840000		chr10	72560000	72570000	chr10	73040000	73050000		chr10	44170000	44180000	chr10	45350000	45360000		chr10	102830000	102840000	chr10	102910000	102920000		chr10	26620000	26630000	chr10	26970000	26980000
	chr10	89990000	90000000	chr10	90300000	90310000		chr10	101600000	101610000	chr10	101930000	101940000		chr10	79820000	79830000	chr10	80550000	80560000		chr10	72550000	72560000	chr10	72960000	72970000		chr10	44210000	44220000	chr10	44530000	44540000		chr10	75020000	75030000	chr10	75110000	75120000		chr10	26620000	26630000	chr10	26840000	26850000
	chr10	89880000	89890000	chr10	90300000	90310000		chr10	101600000	101610000	chr10	102260000	102270000		chr10	79800000	79810000	chr10	79920000	79930000		chr10	72560000	72570000	chr10	72640000	72650000		chr10	104860000	104870000	chr10	104940000	104950000		chr10	52220000	52230000	chr10	52370000	52380000		chr10	71190000	71200000	chr10	71460000	71470000
	chr10	50520000	50530000	chr10	50600000	50610000		chr10	101600000	101610000	chr10	102190000	102200000		chr10	79800000	79810000	chr10	80060000	80070000		chr10	77790000	77800000	chr10	78730000	78740000		chr10	104860000	104870000	chr10	105080000	105090000		chr10	13200000	13210000	chr10	13340000	13350000		chr10	71180000	71190000	chr10	71390000	71400000
	chr10	50530000	50540000	chr10	50720000	50730000		chr10	8330000	8340000	chr10	8740000	8750000		chr10	79810000	79820000	chr10	80390000	80400000		chr10	77790000	77800000	chr10	78300000	78310000		chr10	104840000	104850000	chr10	105000000	105010000		chr10	27440000	27450000	chr10	27520000	27530000		chr10	71180000	71190000	chr10	71260000	71270000
	chr10	102970000	102980000	chr10	103050000	103060000		chr10	8350000	8360000	chr10	8920000	8930000		chr10	79810000	79820000	chr10	80270000	80280000		chr10	79150000	79160000	chr10	79400000	79410000		chr10	14740000	14750000	chr10	14850000	14860000		chr10	72210000	72220000	chr10	72290000	72300000		chr10	113510000	113520000	chr10	113900000	113910000
	chr10	102960000	102970000	chr10	103520000	103530000		chr10	101820000	101830000	chr10	101910000	101920000		chr10	79810000	79820000	chr10	80130000	80140000		chr10	26130000	26140000	chr10	26850000	26860000		chr10	14800000	14810000	chr10	15040000	15050000		chr10	97450000	97460000	chr10	97550000	97560000		chr10	98140000	98150000	chr10	98500000	98510000
	chr10	102970000	102980000	chr10	103320000	103330000		chr10	101810000	101820000	chr10	101940000	101950000		chr10	79800000	79810000	chr10	80950000	80960000		chr10	26160000	26170000	chr10	26540000	26550000		chr10	75880000	75890000	chr10	76990000	77000000		chr10	67970000	67980000	chr10	68050000	68060000		chr10	98150000	98160000	chr10	98780000	98790000
	chr10	102970000	102980000	chr10	103190000	103200000		chr10	23730000	23740000	chr10	23810000	23820000		chr10	22270000	22280000	chr10	22960000	22970000		chr10	115890000	115900000	chr10	116300000	116310000		chr10	75890000	75900000	chr10	76860000	76870000		chr10	50490000	50500000	chr10	50600000	50610000		chr10	98150000	98160000	chr10	98970000	98980000
	chr10	123070000	123080000	chr10	123350000	123360000		chr10	23740000	23750000	chr10	23920000	23930000		chr10	22280000	22290000	chr10	22600000	22610000		chr10	115930000	115940000	chr10	116010000	116020000		chr10	75900000	75910000	chr10	75990000	76000000		chr10	67560000	67570000	chr10	67640000	67650000		chr10	98130000	98140000	chr10	98430000	98440000
	chr10	123090000	123100000	chr10	123170000	123180000		chr10	23740000	23750000	chr10	23980000	23990000		chr10	22280000	22290000	chr10	22840000	22850000		chr10	115930000	115940000	chr10	116190000	116200000		chr10	4390000	4400000	chr10	4690000	4700000		chr10	97980000	97990000	chr10	98060000	98070000		chr10	98150000	98160000	chr10	98380000	98390000
	chr10	123080000	123090000	chr10	123220000	123230000		chr10	12940000	12950000	chr10	13090000	13100000		chr10	22290000	22300000	chr10	22710000	22720000		chr10	115910000	115920000	chr10	116220000	116230000		chr10	4320000	4330000	chr10	4690000	4700000		chr10	5480000	5490000	chr10	5580000	5590000		chr10	98130000	98140000	chr10	98270000	98280000
	chr10	117190000	117200000	chr10	118140000	118150000		chr10	13000000	13010000	chr10	13100000	13110000		chr10	22290000	22300000	chr10	23270000	23280000		chr10	29860000	29870000	chr10	30150000	30160000		chr10	4360000	4370000	chr10	4790000	4800000		chr10	73070000	73080000	chr10	73160000	73170000		chr10	98150000	98160000	chr10	98570000	98580000
	chr10	117200000	117210000	chr10	118040000	118050000		chr10	63500000	63510000	chr10	63580000	63590000		chr10	22280000	22290000	chr10	23350000	23360000		chr10	29900000	29910000	chr10	30010000	30020000		chr10	4280000	4290000	chr10	4810000	4820000		chr10	98590000	98600000	chr10	98670000	98680000		chr10	93510000	93520000	chr10	93610000	93620000
	chr10	50350000	50360000	chr10	50730000	50740000		chr10	63510000	63520000	chr10	63650000	63660000		chr10	970000	980000	chr10	1080000	1090000		chr10	119480000	119490000	chr10	119990000	120000000		chr10	126850000	126860000	chr10	127390000	127400000		chr10	120840000	120850000	chr10	120920000	120930000		chr10	93510000	93520000	chr10	93670000	93680000
	chr10	120480000	120490000	chr10	120560000	120570000		chr10	63510000	63520000	chr10	64000000	64010000		chr10	78390000	78400000	chr10	78740000	78750000		chr10	104590000	104600000	chr10	104830000	104840000		chr10	27440000	27450000	chr10	27640000	27650000		chr10	112080000	112090000	chr10	112360000	112370000		chr10	7300000	7310000	chr10	7450000	7460000
	chr10	120490000	120500000	chr10	120780000	120790000		chr10	63510000	63520000	chr10	63790000	63800000		chr10	78380000	78390000	chr10	78870000	78880000		chr10	104590000	104600000	chr10	104670000	104680000		chr10	27440000	27450000	chr10	27520000	27530000		chr10	97510000	97520000	chr10	97590000	97600000		chr10	22050000	22060000	chr10	22210000	22220000
	chr10	80040000	80050000	chr10	80410000	80420000		chr10	45750000	45760000	chr10	45950000	45960000		chr10	87300000	87310000	chr10	87650000	87660000		chr10	129870000	129880000	chr10	129960000	129970000		chr10	102320000	102330000	chr10	102630000	102640000		chr10	52080000	52090000	chr10	52380000	52390000		chr10	60170000	60180000	chr10	60260000	60270000
	chr10	80060000	80070000	chr10	80140000	80150000		chr10	45750000	45760000	chr10	46150000	46160000		chr10	87320000	87330000	chr10	87530000	87540000		chr10	126080000	126090000	chr10	126420000	126430000		chr10	102320000	102330000	chr10	102500000	102510000		chr10	5570000	5580000	chr10	5660000	5670000		chr10	60170000	60180000	chr10	60390000	60400000
	chr10	89620000	89630000	chr10	90140000	90150000		chr10	45740000	45750000	chr10	46080000	46090000		chr10	87300000	87310000	chr10	88130000	88140000		chr10	126090000	126100000	chr10	126170000	126180000		chr10	32170000	32180000	chr10	32640000	32650000		chr10	77170000	77180000	chr10	77250000	77260000		chr10	60170000	60180000	chr10	60530000	60540000
	chr10	89620000	89630000	chr10	89720000	89730000		chr10	127670000	127680000	chr10	128270000	128280000		chr10	87290000	87300000	chr10	87740000	87750000		chr10	126090000	126100000	chr10	126210000	126220000		chr10	32110000	32120000	chr10	32630000	32640000		chr10	123090000	123100000	chr10	123350000	123360000		chr10	80830000	80840000	chr10	80940000	80950000
	chr10	89610000	89620000	chr10	89860000	89870000		chr10	127670000	127680000	chr10	127780000	127790000		chr10	87330000	87340000	chr10	87440000	87450000		chr10	123150000	123160000	chr10	123350000	123360000		chr10	32140000	32150000	chr10	32320000	32330000		chr10	98880000	98890000	chr10	98960000	98970000		chr10	5480000	5490000	chr10	5910000	5920000
	chr10	89620000	89630000	chr10	90000000	90010000		chr10	127630000	127640000	chr10	127830000	127840000		chr10	88710000	88720000	chr10	88900000	88910000		chr10	21560000	21570000	chr10	21780000	21790000		chr10	32150000	32160000	chr10	32490000	32500000		chr10	73230000	73240000	chr10	73310000	73320000		chr10	5480000	5490000	chr10	5660000	5670000
	chr10	89610000	89620000	chr10	90310000	90320000		chr10	127630000	127640000	chr10	128410000	128420000		chr10	88720000	88730000	chr10	88960000	88970000		chr10	21570000	21580000	chr10	21720000	21730000		chr10	9370000	9380000	chr10	11300000	11310000		chr10	62040000	62050000	chr10	62140000	62150000		chr10	5480000	5490000	chr10	5810000	5820000
	chr10	59510000	59520000	chr10	59910000	59920000		chr10	127630000	127640000	chr10	128060000	128070000		chr10	88720000	88730000	chr10	88840000	88850000		chr10	21550000	21560000	chr10	22030000	22040000		chr10	102820000	102830000	chr10	102900000	102910000		chr10	49570000	49580000	chr10	49700000	49710000		chr10	74450000	74460000	chr10	74590000	74600000
	chr10	59470000	59480000	chr10	59900000	59910000		chr10	127670000	127680000	chr10	127910000	127920000		chr10	102070000	102080000	chr10	102460000	102470000		chr10	21560000	21570000	chr10	22250000	22260000		chr10	119380000	119390000	chr10	120000000	120010000		chr10	99690000	99700000	chr10	99790000	99800000		chr10	80450000	80460000	chr10	80820000	80830000
	chr10	59480000	59490000	chr10	59580000	59590000		chr10	127620000	127630000	chr10	128190000	128200000		chr10	102120000	102130000	chr10	102760000	102770000		chr10	21560000	21570000	chr10	21640000	21650000		chr10	119380000	119390000	chr10	119870000	119880000		chr10	104870000	104880000	chr10	104990000	105000000		chr10	80420000	80430000	chr10	80950000	80960000
	chr10	59450000	59460000	chr10	59810000	59820000		chr10	127670000	127680000	chr10	127970000	127980000		chr10	102090000	102100000	chr10	102630000	102640000		chr10	7910000	7920000	chr10	8400000	8410000		chr10	5040000	5050000	chr10	5120000	5130000		chr10	111670000	111680000	chr10	111750000	111760000		chr10	91550000	91560000	chr10	92350000	92360000
	chr10	97970000	97980000	chr10	98050000	98060000		chr10	127630000	127640000	chr10	127970000	127980000		chr10	102080000	102090000	chr10	102380000	102390000		chr10	7910000	7920000	chr10	8220000	8230000		chr10	5020000	5030000	chr10	5420000	5430000		chr10	125990000	126000000	chr10	126070000	126080000		chr10	91550000	91560000	chr10	91700000	91710000
	chr10	123790000	123800000	chr10	123870000	123880000		chr10	127640000	127650000	chr10	128150000	128160000		chr10	102100000	102110000	chr10	102190000	102200000		chr10	7910000	7920000	chr10	8910000	8920000		chr10	5030000	5040000	chr10	5450000	5460000		chr10	106020000	106030000	chr10	106100000	106110000		chr10	91550000	91560000	chr10	92620000	92630000
	chr10	90590000	90600000	chr10	90690000	90700000		chr10	14640000	14650000	chr10	15130000	15140000		chr10	92660000	92670000	chr10	93670000	93680000		chr10	7910000	7920000	chr10	8990000	9000000		chr10	5030000	5040000	chr10	5310000	5320000		chr10	126220000	126230000	chr10	126310000	126320000		chr10	91540000	91550000	chr10	92420000	92430000
	chr10	90600000	90610000	chr10	90970000	90980000		chr10	14640000	14650000	chr10	14860000	14870000		chr10	92660000	92670000	chr10	92760000	92770000		chr10	7910000	7920000	chr10	9110000	9120000		chr10	81110000	81120000	chr10	81940000	81950000		chr10	65390000	65400000	chr10	65470000	65480000		chr10	91550000	91560000	chr10	92540000	92550000
	chr10	120330000	120340000	chr10	120570000	120580000		chr10	14240000	14250000	chr10	15020000	15030000		chr10	92660000	92670000	chr10	93120000	93130000		chr10	7910000	7920000	chr10	9240000	9250000		chr10	81120000	81130000	chr10	81680000	81690000		chr10	134030000	134040000	chr10	134160000	134170000		chr10	130820000	130830000	chr10	131760000	131770000
	chr10	120330000	120340000	chr10	120460000	120470000		chr10	14240000	14250000	chr10	14510000	14520000		chr10	92670000	92680000	chr10	93010000	93020000		chr10	7910000	7920000	chr10	8610000	8620000		chr10	81130000	81140000	chr10	81240000	81250000		chr10	70550000	70560000	chr10	70650000	70660000		chr10	130830000	130840000	chr10	131340000	131350000
	chr10	120330000	120340000	chr10	120750000	120760000		chr10	14230000	14240000	chr10	14890000	14900000		chr10	92680000	92690000	chr10	93400000	93410000		chr10	7930000	7940000	chr10	8080000	8090000		chr10	79600000	79610000	chr10	79720000	79730000		chr10	95470000	95480000	chr10	95560000	95570000		chr10	65220000	65230000	chr10	65480000	65490000
	chr10	101670000	101680000	chr10	101790000	101800000		chr10	14230000	14240000	chr10	14360000	14370000		chr10	60170000	60180000	chr10	60400000	60410000		chr10	71980000	71990000	chr10	72120000	72130000		chr10	3260000	3270000	chr10	4170000	4180000		chr10	101500000	101510000	chr10	101580000	101590000		chr10	65270000	65280000	chr10	65470000	65480000
	chr10	42970000	42980000	chr10	43250000	43260000		chr10	4260000	4270000	chr10	4690000	4700000		chr10	60160000	60170000	chr10	60940000	60950000		chr10	71980000	71990000	chr10	72270000	72280000		chr10	3300000	3310000	chr10	3440000	3450000		chr10	71930000	71940000	chr10	72120000	72130000		chr10	65270000	65280000	chr10	65380000	65390000
	chr10	115330000	115340000	chr10	115410000	115420000		chr10	4280000	4290000	chr10	4810000	4820000		chr10	60170000	60180000	chr10	60990000	61000000		chr10	4700000	4710000	chr10	4800000	4810000		chr10	3280000	3290000	chr10	4110000	4120000		chr10	124220000	124230000	chr10	124310000	124320000		chr10	11560000	11570000	chr10	11640000	11650000
	chr10	65820000	65830000	chr10	66190000	66200000		chr10	106060000	106070000	chr10	106370000	106380000		chr10	60170000	60180000	chr10	60720000	60730000		chr10	134180000	134190000	chr10	134260000	134270000		chr10	3280000	3290000	chr10	4690000	4700000		chr10	69620000	69630000	chr10	69840000	69850000		chr10	11550000	11560000	chr10	11760000	11770000
	chr10	65870000	65880000	chr10	66190000	66200000		chr10	106040000	106050000	chr10	106120000	106130000		chr10	60170000	60180000	chr10	60290000	60300000		chr10	134200000	134210000	chr10	134450000	134460000		chr10	3280000	3290000	chr10	3800000	3810000		chr10	70890000	70900000	chr10	70970000	70980000		chr10	3520000	3530000	chr10	3930000	3940000
	chr10	65850000	65860000	chr10	66040000	66050000		chr10	124050000	124060000	chr10	124320000	124330000		chr10	60170000	60180000	chr10	60530000	60540000		chr10	134180000	134190000	chr10	134380000	134390000		chr10	3260000	3270000	chr10	3980000	3990000		chr10	99400000	99410000	chr10	99480000	99490000		chr10	3490000	3500000	chr10	4690000	4700000
	chr10	65800000	65810000	chr10	66050000	66060000		chr10	124030000	124040000	chr10	124460000	124470000		chr10	49570000	49580000	chr10	49710000	49720000		chr10	119360000	119370000	chr10	120010000	120020000		chr10	3230000	3240000	chr10	4810000	4820000		chr10	125750000	125760000	chr10	125830000	125840000		chr10	3490000	3500000	chr10	3580000	3590000
	chr10	71160000	71170000	chr10	71460000	71470000		chr10	124100000	124110000	chr10	124450000	124460000		chr10	49570000	49580000	chr10	49850000	49860000		chr10	29720000	29730000	chr10	30290000	30300000		chr10	3260000	3270000	chr10	4590000	4600000		chr10	93850000	93860000	chr10	93930000	93940000		chr10	3510000	3520000	chr10	3800000	3810000
	chr10	71180000	71190000	chr10	71280000	71290000		chr10	124050000	124060000	chr10	124190000	124200000		chr10	23730000	23740000	chr10	23990000	24000000		chr10	112170000	112180000	chr10	112250000	112260000		chr10	3250000	3260000	chr10	4370000	4380000		chr10	129700000	129710000	chr10	129860000	129870000		chr10	28720000	28730000	chr10	28890000	28900000
	chr10	71170000	71180000	chr10	71390000	71400000		chr10	122700000	122710000	chr10	123030000	123040000		chr10	23730000	23740000	chr10	23810000	23820000		chr10	88020000	88030000	chr10	88130000	88140000		chr10	117550000	117560000	chr10	118050000	118060000		chr10	111960000	111970000	chr10	112040000	112050000		chr10	12940000	12950000	chr10	13110000	13120000
	chr10	71180000	71190000	chr10	71560000	71570000		chr10	122710000	122720000	chr10	123360000	123370000		chr10	114480000	114490000	chr10	114640000	114650000		chr10	103600000	103610000	chr10	103760000	103770000		chr10	117550000	117560000	chr10	118130000	118140000		chr10	89920000	89930000	chr10	90010000	90020000		chr10	22280000	22290000	chr10	22510000	22520000
	chr10	24270000	24280000	chr10	24800000	24810000		chr10	122700000	122710000	chr10	123640000	123650000		chr10	114450000	114460000	chr10	114960000	114970000		chr10	103610000	103620000	chr10	103830000	103840000		chr10	61860000	61870000	chr10	61970000	61980000		chr10	93590000	93600000	chr10	93670000	93680000		chr10	22290000	22300000	chr10	22840000	22850000
	chr10	24290000	24300000	chr10	24470000	24480000		chr10	122700000	122710000	chr10	123490000	123500000		chr10	114450000	114460000	chr10	115150000	115160000		chr10	7560000	7570000	chr10	7720000	7730000		chr10	61850000	61860000	chr10	62390000	62400000		chr10	12300000	12310000	chr10	12390000	12400000		chr10	22300000	22310000	chr10	22700000	22710000
	chr10	24290000	24300000	chr10	24630000	24640000		chr10	122720000	122730000	chr10	122820000	122830000		chr10	114480000	114490000	chr10	114880000	114890000		chr10	7560000	7570000	chr10	9340000	9350000		chr10	61960000	61970000	chr10	62400000	62410000		chr10	28710000	28720000	chr10	28830000	28840000		chr10	22310000	22320000	chr10	23340000	23350000
	chr10	24300000	24310000	chr10	24570000	24580000		chr10	122710000	122720000	chr10	123190000	123200000		chr10	114480000	114490000	chr10	114700000	114710000		chr10	7550000	7560000	chr10	9260000	9270000		chr10	61870000	61880000	chr10	62110000	62120000		chr10	44670000	44680000	chr10	44750000	44760000		chr10	22280000	22290000	chr10	22980000	22990000
	chr10	133040000	133050000	chr10	133630000	133640000		chr10	122710000	122720000	chr10	122940000	122950000		chr10	107960000	107970000	chr10	108110000	108120000		chr10	90690000	90700000	chr10	90770000	90780000		chr10	61870000	61880000	chr10	62190000	62200000		chr10	123550000	123560000	chr10	123630000	123640000		chr10	22290000	22300000	chr10	23270000	23280000
	chr10	88460000	88470000	chr10	88650000	88660000		chr10	94270000	94280000	chr10	94410000	94420000		chr10	107970000	107980000	chr10	108360000	108370000		chr10	90700000	90710000	chr10	90960000	90970000		chr10	61950000	61960000	chr10	62190000	62200000		chr10	75760000	75770000	chr10	75840000	75850000		chr10	22290000	22300000	chr10	22600000	22610000
	chr10	88450000	88460000	chr10	88830000	88840000		chr10	94400000	94410000	chr10	94630000	94640000		chr10	28200000	28210000	chr10	28430000	28440000		chr10	31010000	31020000	chr10	32100000	32110000		chr10	62030000	62040000	chr10	62180000	62190000		chr10	60060000	60070000	chr10	60140000	60150000		chr10	114220000	114230000	chr10	115320000	115330000
	chr10	115050000	115060000	chr10	115140000	115150000		chr10	91350000	91360000	chr10	91470000	91480000		chr10	125980000	125990000	chr10	126070000	126080000		chr10	31020000	31030000	chr10	31790000	31800000		chr10	61890000	61900000	chr10	62520000	62530000		chr10	134760000	134770000	chr10	134930000	134940000		chr10	114270000	114280000	chr10	114870000	114880000
	chr10	115070000	115080000	chr10	115270000	115280000		chr10	91350000	91360000	chr10	91470000	91480000		chr10	125960000	125970000	chr10	126190000	126200000		chr10	45010000	45020000	chr10	45320000	45330000		chr10	122830000	122840000	chr10	123350000	123360000		chr10	116460000	116470000	chr10	116540000	116550000		chr10	114230000	114240000	chr10	115140000	115150000
	chr10	75270000	75280000	chr10	75490000	75500000		chr10	125950000	125960000	chr10	126190000	126200000		chr10	76170000	76180000	chr10	76300000	76310000		chr10	118970000	118980000	chr10	119210000	119220000		chr10	122820000	122830000	chr10	123490000	123500000		chr10	116060000	116070000	chr10	116190000	116200000		chr10	92680000	92690000	chr10	93020000	93030000
	chr10	75280000	75290000	chr10	75400000	75410000		chr10	125980000	125990000	chr10	126070000	126080000		chr10	76190000	76200000	chr10	76770000	76780000		chr10	118970000	118980000	chr10	119070000	119080000		chr10	122820000	122830000	chr10	123650000	123660000		chr10	123690000	123700000	chr10	123780000	123790000		chr10	95310000	95320000	chr10	95440000	95450000
	chr10	59830000	59840000	chr10	59910000	59920000		chr10	15760000	15770000	chr10	15860000	15870000		chr10	76170000	76180000	chr10	76850000	76860000		chr10	75020000	75030000	chr10	75110000	75120000		chr10	74830000	74840000	chr10	74910000	74920000		chr10	90350000	90360000	chr10	90440000	90450000		chr10	95310000	95320000	chr10	95610000	95620000
	chr10	50190000	50200000	chr10	50580000	50590000		chr10	7490000	7500000	chr10	9350000	9360000		chr10	61870000	61880000	chr10	61960000	61970000		chr10	75010000	75020000	chr10	75390000	75400000		chr10	4720000	4730000	chr10	4800000	4810000		chr10	129710000	129720000	chr10	129800000	129810000		chr10	86130000	86140000	chr10	86290000	86300000
	chr10	50170000	50180000	chr10	50710000	50720000		chr10	9150000	9160000	chr10	9240000	9250000		chr10	61860000	61870000	chr10	62090000	62100000		chr10	10730000	10740000	chr10	11070000	11080000		chr10	23020000	23030000	chr10	23100000	23110000		chr10	124190000	124200000	chr10	124320000	124330000		chr10	78060000	78070000	chr10	78740000	78750000
	chr10	50210000	50220000	chr10	50360000	50370000		chr10	9160000	9170000	chr10	9330000	9340000		chr10	61860000	61870000	chr10	62390000	62400000		chr10	24470000	24480000	chr10	24800000	24810000		chr10	23010000	23020000	chr10	23260000	23270000		chr10	5930000	5940000	chr10	6010000	6020000		chr10	23600000	23610000	chr10	23810000	23820000
	chr10	64590000	64600000	chr10	64820000	64830000		chr10	62050000	62060000	chr10	62540000	62550000		chr10	61860000	61870000	chr10	62190000	62200000		chr10	24540000	24550000	chr10	24790000	24800000		chr10	70110000	70120000	chr10	70490000	70500000		chr10	6530000	6540000	chr10	6610000	6620000		chr10	23600000	23610000	chr10	23950000	23960000
	chr10	63360000	63370000	chr10	63480000	63490000		chr10	62040000	62050000	chr10	62190000	62200000		chr10	61880000	61890000	chr10	62510000	62520000		chr10	24550000	24560000	chr10	24630000	24640000		chr10	70120000	70130000	chr10	70650000	70660000		chr10	134030000	134040000	chr10	134250000	134260000		chr10	23600000	23610000	chr10	24480000	24490000
	chr10	127530000	127540000	chr10	128160000	128170000		chr10	74330000	74340000	chr10	74600000	74610000		chr10	127550000	127560000	chr10	127840000	127850000		chr10	92670000	92680000	chr10	93010000	93020000		chr10	70160000	70170000	chr10	70650000	70660000		chr10	64940000	64950000	chr10	65170000	65180000		chr10	88730000	88740000	chr10	88900000	88910000
	chr10	127550000	127560000	chr10	128070000	128080000		chr10	74320000	74330000	chr10	74630000	74640000		chr10	127550000	127560000	chr10	128430000	128440000		chr10	72310000	72320000	chr10	72520000	72530000		chr10	70170000	70180000	chr10	70250000	70260000		chr10	90160000	90170000	chr10	90300000	90310000		chr10	34950000	34960000	chr10	35100000	35110000
	chr10	127530000	127540000	chr10	128260000	128270000		chr10	74310000	74320000	chr10	74810000	74820000		chr10	127550000	127560000	chr10	128070000	128080000		chr10	72310000	72320000	chr10	72620000	72630000		chr10	86380000	86390000	chr10	88140000	88150000		chr10	115200000	115210000	chr10	115280000	115290000		chr10	34960000	34970000	chr10	35270000	35280000
	chr10	127530000	127540000	chr10	128290000	128300000		chr10	75020000	75030000	chr10	75120000	75130000		chr10	127550000	127560000	chr10	128190000	128200000		chr10	15940000	15950000	chr10	16580000	16590000		chr10	86350000	86360000	chr10	86580000	86590000		chr10	43130000	43140000	chr10	43270000	43280000		chr10	134750000	134760000	chr10	134930000	134940000
	chr10	127550000	127560000	chr10	127660000	127670000		chr10	75010000	75020000	chr10	75260000	75270000		chr10	127540000	127550000	chr10	128520000	128530000		chr10	15950000	15960000	chr10	16810000	16820000		chr10	120960000	120970000	chr10	121170000	121180000		chr10	100100000	100110000	chr10	100190000	100200000		chr10	134740000	134750000	chr10	135040000	135050000
	chr10	101600000	101610000	chr10	101800000	101810000		chr10	75020000	75030000	chr10	75400000	75410000		chr10	127550000	127560000	chr10	127990000	128000000		chr10	15930000	15940000	chr10	16440000	16450000		chr10	120950000	120960000	chr10	121600000	121610000		chr10	76680000	76690000	chr10	76770000	76780000		chr10	134750000	134760000	chr10	135130000	135140000
	chr10	101620000	101630000	chr10	101940000	101950000		chr10	52320000	52330000	chr10	52650000	52660000		chr10	127550000	127560000	chr10	127660000	127670000		chr10	97770000	97780000	chr10	98090000	98100000		chr10	120960000	120970000	chr10	121310000	121320000		chr10	124890000	124900000	chr10	125040000	125050000		chr10	43250000	43260000	chr10	43600000	43610000
	chr10	88730000	88740000	chr10	88850000	88860000		chr10	52310000	52320000	chr10	52410000	52420000		chr10	26040000	26050000	chr10	26160000	26170000		chr10	88280000	88290000	chr10	88640000	88650000		chr10	11550000	11560000	chr10	11790000	11800000		chr10	116220000	116230000	chr10	116300000	116310000		chr10	102310000	102320000	chr10	102630000	102640000
	chr10	88730000	88740000	chr10	88810000	88820000		chr10	6350000	6360000	chr10	6430000	6440000		chr10	26010000	26020000	chr10	26840000	26850000		chr10	88150000	88160000	chr10	88640000	88650000		chr10	11560000	11570000	chr10	11650000	11660000		chr10	134730000	134740000	chr10	134950000	134960000		chr10	118970000	118980000	chr10	119070000	119080000
	chr10	102070000	102080000	chr10	102630000	102640000		chr10	6310000	6320000	chr10	6790000	6800000		chr10	26010000	26020000	chr10	26550000	26560000		chr10	88160000	88170000	chr10	88340000	88350000		chr10	11540000	11550000	chr10	12030000	12040000		chr10	97810000	97820000	chr10	97890000	97900000		chr10	118980000	118990000	chr10	119170000	119180000
	chr10	102090000	102100000	chr10	102260000	102270000		chr10	17330000	17340000	chr10	17470000	17480000		chr10	29670000	29680000	chr10	30280000	30290000		chr10	88270000	88280000	chr10	88440000	88450000		chr10	11550000	11560000	chr10	11750000	11760000		chr10	730000	740000	chr10	820000	830000		chr10	117560000	117570000	chr10	118040000	118050000
	chr10	102100000	102110000	chr10	102190000	102200000		chr10	17330000	17340000	chr10	18520000	18530000		chr10	29660000	29670000	chr10	30310000	30320000		chr10	88160000	88170000	chr10	88430000	88440000		chr10	101600000	101610000	chr10	101800000	101810000		chr10	90790000	90800000	chr10	90870000	90880000		chr10	61380000	61390000	chr10	61560000	61570000
	chr10	78780000	78790000	chr10	78860000	78870000		chr10	17330000	17340000	chr10	17640000	17650000		chr10	29660000	29670000	chr10	29780000	29790000		chr10	97980000	97990000	chr10	98060000	98070000		chr10	101610000	101620000	chr10	101970000	101980000		chr10	78930000	78940000	chr10	79010000	79020000		chr10	61390000	61400000	chr10	61960000	61970000
	chr10	6040000	6050000	chr10	6450000	6460000		chr10	49750000	49760000	chr10	49850000	49860000		chr10	76870000	76880000	chr10	76980000	76990000		chr10	16890000	16900000	chr10	17480000	17490000		chr10	65390000	65400000	chr10	65470000	65480000		chr10	94080000	94090000	chr10	94170000	94180000		chr10	61400000	61410000	chr10	61670000	61680000
	chr10	79820000	79830000	chr10	80000000	80010000		chr10	49730000	49740000	chr10	50010000	50020000		chr10	89290000	89300000	chr10	89490000	89500000		chr10	16880000	16890000	chr10	17290000	17300000		chr10	77260000	77270000	chr10	77800000	77810000		chr10	99540000	99550000	chr10	99620000	99630000		chr10	61380000	61390000	chr10	61800000	61810000
	chr10	79840000	79850000	chr10	80410000	80420000		chr10	42990000	43000000	chr10	43580000	43590000		chr10	89270000	89280000	chr10	90240000	90250000		chr10	16870000	16880000	chr10	17630000	17640000		chr10	3640000	3650000	chr10	4700000	4710000		chr10	62420000	62430000	chr10	62510000	62520000		chr10	60700000	60710000	chr10	61350000	61360000
	chr10	79800000	79810000	chr10	80950000	80960000		chr10	42970000	42980000	chr10	43270000	43280000		chr10	89280000	89290000	chr10	90310000	90320000		chr10	89790000	89800000	chr10	90060000	90070000		chr10	3730000	3740000	chr10	4700000	4710000		chr10	114840000	114850000	chr10	115140000	115150000		chr10	60710000	60720000	chr10	60940000	60950000
	chr10	79810000	79820000	chr10	80180000	80190000		chr10	52980000	52990000	chr10	53110000	53120000		chr10	89290000	89300000	chr10	90150000	90160000		chr10	28960000	28970000	chr10	29420000	29430000		chr10	3710000	3720000	chr10	3790000	3800000		chr10	64930000	64940000	chr10	65020000	65030000		chr10	116930000	116940000	chr10	117170000	117180000
	chr10	59320000	59330000	chr10	59900000	59910000		chr10	123910000	123920000	chr10	123990000	124000000		chr10	124890000	124900000	chr10	125140000	125150000		chr10	28960000	28970000	chr10	29280000	29290000		chr10	3650000	3660000	chr10	4800000	4810000		chr10	22300000	22310000	chr10	22390000	22400000		chr10	5020000	5030000	chr10	5420000	5430000
	chr10	59340000	59350000	chr10	59600000	59610000		chr10	123890000	123900000	chr10	124320000	124330000		chr10	124900000	124910000	chr10	125310000	125320000		chr10	28960000	28970000	chr10	29160000	29170000		chr10	28020000	28030000	chr10	28670000	28680000		chr10	104390000	104400000	chr10	104470000	104480000		chr10	5050000	5060000	chr10	5130000	5140000
	chr10	59340000	59350000	chr10	59420000	59430000		chr10	123900000	123910000	chr10	124440000	124450000		chr10	124860000	124870000	chr10	125720000	125730000		chr10	28940000	28950000	chr10	29590000	29600000		chr10	28040000	28050000	chr10	28460000	28470000		chr10	100010000	100020000	chr10	100090000	100100000		chr10	5060000	5070000	chr10	5330000	5340000
	chr10	59340000	59350000	chr10	59820000	59830000		chr10	123910000	123920000	chr10	124180000	124190000		chr10	77360000	77370000	chr10	78310000	78320000		chr10	28930000	28940000	chr10	29680000	29690000		chr10	28070000	28080000	chr10	28450000	28460000		chr10	112100000	112110000	chr10	112180000	112190000		chr10	5020000	5030000	chr10	5320000	5330000
	chr10	122860000	122870000	chr10	123360000	123370000		chr10	50410000	50420000	chr10	50590000	50600000		chr10	77410000	77420000	chr10	78050000	78060000		chr10	104260000	104270000	chr10	104340000	104350000		chr10	28030000	28040000	chr10	28510000	28520000		chr10	64830000	64840000	chr10	64910000	64920000		chr10	111640000	111650000	chr10	111890000	111900000
	chr10	122850000	122860000	chr10	123010000	123020000		chr10	50420000	50430000	chr10	50710000	50720000		chr10	77380000	77390000	chr10	78040000	78050000		chr10	118570000	118580000	chr10	118850000	118860000		chr10	86130000	86140000	chr10	86290000	86300000		chr10	101600000	101610000	chr10	101680000	101690000		chr10	111640000	111650000	chr10	112040000	112050000
	chr10	122870000	122880000	chr10	123150000	123160000		chr10	70210000	70220000	chr10	70520000	70530000		chr10	28950000	28960000	chr10	29410000	29420000		chr10	118440000	118450000	chr10	118540000	118550000		chr10	131670000	131680000	chr10	131750000	131760000		chr10	121200000	121210000	chr10	121280000	121290000		chr10	111660000	111670000	chr10	111970000	111980000
	chr10	122840000	122850000	chr10	123220000	123230000		chr10	70140000	70150000	chr10	70500000	70510000		chr10	28950000	28960000	chr10	29590000	29600000		chr10	118550000	118560000	chr10	118920000	118930000		chr10	71980000	71990000	chr10	72120000	72130000		chr10	57050000	57060000	chr10	57130000	57140000		chr10	111640000	111650000	chr10	111770000	111780000
	chr10	122850000	122860000	chr10	123080000	123090000		chr10	70180000	70190000	chr10	70670000	70680000		chr10	28930000	28940000	chr10	29510000	29520000		chr10	102100000	102110000	chr10	102270000	102280000		chr10	71970000	71980000	chr10	72300000	72310000		chr10	115930000	115940000	chr10	116020000	116030000		chr10	75020000	75030000	chr10	75400000	75410000
	chr10	122830000	122840000	chr10	123450000	123460000		chr10	70230000	70240000	chr10	70660000	70670000		chr10	28960000	28970000	chr10	29280000	29290000		chr10	102090000	102100000	chr10	102190000	102200000		chr10	32670000	32680000	chr10	33440000	33450000		chr10	94730000	94740000	chr10	94830000	94840000		chr10	3850000	3860000	chr10	3930000	3940000
	chr10	69770000	69780000	chr10	69910000	69920000		chr10	93400000	93410000	chr10	93500000	93510000		chr10	75610000	75620000	chr10	75700000	75710000		chr10	126850000	126860000	chr10	127040000	127050000		chr10	32650000	32660000	chr10	33290000	33300000		chr10	5130000	5140000	chr10	5320000	5330000		chr10	3830000	3840000	chr10	4280000	4290000
	chr10	69770000	69780000	chr10	70060000	70070000		chr10	93400000	93410000	chr10	93670000	93680000		chr10	75640000	75650000	chr10	75840000	75850000		chr10	126830000	126840000	chr10	127300000	127310000		chr10	116220000	116230000	chr10	116540000	116550000		chr10	93400000	93410000	chr10	93490000	93500000		chr10	3840000	3850000	chr10	4690000	4700000
	chr10	96720000	96730000	chr10	96910000	96920000		chr10	100510000	100520000	chr10	100930000	100940000		chr10	75530000	75540000	chr10	75850000	75860000		chr10	126840000	126850000	chr10	127400000	127410000		chr10	116230000	116240000	chr10	116450000	116460000		chr10	97380000	97390000	chr10	97610000	97620000		chr10	3830000	3840000	chr10	4110000	4120000
	chr10	96740000	96750000	chr10	97000000	97010000		chr10	100550000	100560000	chr10	101000000	101010000		chr10	75660000	75670000	chr10	75980000	75990000		chr10	116630000	116640000	chr10	116880000	116890000		chr10	116230000	116240000	chr10	116310000	116320000		chr10	72980000	72990000	chr10	73060000	73070000		chr10	3880000	3890000	chr10	4810000	4820000
	chr10	53110000	53120000	chr10	53960000	53970000		chr10	100560000	100570000	chr10	100810000	100820000		chr10	75530000	75540000	chr10	75630000	75640000		chr10	71880000	71890000	chr10	72120000	72130000		chr10	75020000	75030000	chr10	75220000	75230000		chr10	101940000	101950000	chr10	102030000	102040000		chr10	3820000	3830000	chr10	4170000	4180000
	chr10	53150000	53160000	chr10	53690000	53700000		chr10	90440000	90450000	chr10	90570000	90580000		chr10	80830000	80840000	chr10	80910000	80920000		chr10	63790000	63800000	chr10	64130000	64140000		chr10	75010000	75020000	chr10	75490000	75500000		chr10	124930000	124940000	chr10	125010000	125020000		chr10	70880000	70890000	chr10	70980000	70990000
	chr10	113910000	113920000	chr10	114200000	114210000		chr10	90440000	90450000	chr10	90690000	90700000		chr10	121690000	121700000	chr10	122090000	122100000		chr10	63800000	63810000	chr10	64000000	64010000		chr10	75020000	75030000	chr10	75400000	75410000		chr10	17090000	17100000	chr10	17260000	17270000		chr10	70870000	70880000	chr10	71150000	71160000
	chr10	113960000	113970000	chr10	114060000	114070000		chr10	15030000	15040000	chr10	15130000	15140000		chr10	129700000	129710000	chr10	129800000	129810000		chr10	63790000	63800000	chr10	63950000	63960000		chr10	71400000	71410000	chr10	71480000	71490000		chr10	43050000	43060000	chr10	43130000	43140000		chr10	102190000	102200000	chr10	102630000	102640000
	chr10	29320000	29330000	chr10	29400000	29410000		chr10	14690000	14700000	chr10	14860000	14870000		chr10	129710000	129720000	chr10	129930000	129940000		chr10	93840000	93850000	chr10	94190000	94200000		chr10	71400000	71410000	chr10	71660000	71670000		chr10	29820000	29830000	chr10	29910000	29920000		chr10	102190000	102200000	chr10	102280000	102290000
	chr10	37740000	37750000	chr10	38040000	38050000		chr10	21370000	21380000	chr10	21770000	21780000		chr10	85180000	85190000	chr10	85630000	85640000		chr10	93850000	93860000	chr10	94050000	94060000		chr10	120550000	120560000	chr10	120760000	120770000		chr10	970000	980000	chr10	1090000	1100000		chr10	94060000	94070000	chr10	94190000	94200000
	chr10	116920000	116930000	chr10	117150000	117160000		chr10	21340000	21350000	chr10	21980000	21990000		chr10	99670000	99680000	chr10	99800000	99810000		chr10	102190000	102200000	chr10	102270000	102280000		chr10	29940000	29950000	chr10	30140000	30150000		chr10	102970000	102980000	chr10	103050000	103060000		chr10	114710000	114720000	chr10	114880000	114890000
	chr10	116930000	116940000	chr10	117110000	117120000		chr10	21370000	21380000	chr10	21460000	21470000		chr10	99720000	99730000	chr10	99840000	99850000		chr10	102200000	102210000	chr10	102640000	102650000		chr10	29940000	29950000	chr10	30020000	30030000		chr10	61700000	61710000	chr10	61780000	61790000		chr10	114730000	114740000	chr10	115140000	115150000
	chr10	61180000	61190000	chr10	61340000	61350000		chr10	21370000	21380000	chr10	22240000	22250000		chr10	99670000	99680000	chr10	99870000	99880000		chr10	79600000	79610000	chr10	79760000	79770000		chr10	30960000	30970000	chr10	32080000	32090000		chr10	77310000	77320000	chr10	77390000	77400000		chr10	124050000	124060000	chr10	124190000	124200000
	chr10	120930000	120940000	chr10	121570000	121580000		chr10	21360000	21370000	chr10	21690000	21700000		chr10	99670000	99680000	chr10	100050000	100060000		chr10	76020000	76030000	chr10	76260000	76270000		chr10	31780000	31790000	chr10	32090000	32100000		chr10	61000000	61010000	chr10	61380000	61390000		chr10	124050000	124060000	chr10	124320000	124330000
	chr10	120960000	120970000	chr10	121160000	121170000		chr10	21360000	21370000	chr10	21550000	21560000		chr10	99690000	99700000	chr10	100150000	100160000		chr10	76020000	76030000	chr10	76780000	76790000		chr10	14240000	14250000	chr10	14850000	14860000		chr10	114530000	114540000	chr10	114700000	114710000		chr10	95130000	95140000	chr10	95440000	95450000
	chr10	120960000	120970000	chr10	121350000	121360000		chr10	21360000	21370000	chr10	21690000	21700000		chr10	64360000	64370000	chr10	64760000	64770000		chr10	76020000	76030000	chr10	76490000	76500000		chr10	115550000	115560000	chr10	115860000	115870000		chr10	63060000	63070000	chr10	63140000	63150000		chr10	95130000	95140000	chr10	95240000	95250000
	chr10	124470000	124480000	chr10	124560000	124570000		chr10	99930000	99940000	chr10	100060000	100070000		chr10	64350000	64360000	chr10	64910000	64920000		chr10	76020000	76030000	chr10	76530000	76540000		chr10	32540000	32550000	chr10	32650000	32660000		chr10	64980000	64990000	chr10	65300000	65310000		chr10	105800000	105810000	chr10	105880000	105890000
	chr10	78360000	78370000	chr10	78860000	78870000		chr10	99930000	99940000	chr10	100200000	100210000		chr10	64360000	64370000	chr10	64840000	64850000		chr10	76030000	76040000	chr10	76980000	76990000		chr10	120330000	120340000	chr10	120550000	120560000		chr10	124130000	124140000	chr10	124320000	124330000		chr10	105800000	105810000	chr10	105970000	105980000
	chr10	78390000	78400000	chr10	78900000	78910000		chr10	93770000	93780000	chr10	94390000	94400000		chr10	64370000	64380000	chr10	64570000	64580000		chr10	76020000	76030000	chr10	76860000	76870000		chr10	120320000	120330000	chr10	120470000	120480000		chr10	120500000	120510000	chr10	120710000	120720000		chr10	99220000	99230000	chr10	99370000	99380000
	chr10	126100000	126110000	chr10	126180000	126190000		chr10	93840000	93850000	chr10	94190000	94200000		chr10	64350000	64360000	chr10	65520000	65530000		chr10	6710000	6720000	chr10	7450000	7460000		chr10	120330000	120340000	chr10	120790000	120800000		chr10	101210000	101220000	chr10	101300000	101310000		chr10	99220000	99230000	chr10	99310000	99320000
	chr10	64920000	64930000	chr10	65380000	65390000		chr10	93900000	93910000	chr10	94180000	94190000		chr10	101500000	101510000	chr10	101580000	101590000		chr10	6750000	6760000	chr10	6830000	6840000		chr10	120340000	120350000	chr10	120730000	120740000		chr10	69150000	69160000	chr10	69240000	69250000		chr10	30700000	30710000	chr10	30820000	30830000
	chr10	64940000	64950000	chr10	65480000	65490000		chr10	93760000	93770000	chr10	94240000	94250000		chr10	101500000	101510000	chr10	101920000	101930000		chr10	25710000	25720000	chr10	25920000	25930000		chr10	26620000	26630000	chr10	26840000	26850000		chr10	118590000	118600000	chr10	118730000	118740000		chr10	44560000	44570000	chr10	44860000	44870000
	chr10	100640000	100650000	chr10	101000000	101010000		chr10	93730000	93740000	chr10	94190000	94200000		chr10	101510000	101520000	chr10	102010000	102020000		chr10	35530000	35540000	chr10	35610000	35620000		chr10	26630000	26640000	chr10	26960000	26970000		chr10	104250000	104260000	chr10	104330000	104340000		chr10	44580000	44590000	chr10	44800000	44810000
	chr10	35400000	35410000	chr10	35480000	35490000		chr10	93840000	93850000	chr10	94050000	94060000		chr10	101500000	101510000	chr10	101640000	101650000		chr10	35530000	35540000	chr10	35880000	35890000		chr10	26620000	26630000	chr10	27170000	27180000		chr10	120940000	120950000	chr10	121400000	121410000		chr10	44550000	44560000	chr10	45350000	45360000
	chr10	35390000	35400000	chr10	35840000	35850000		chr10	92080000	92090000	chr10	92160000	92170000		chr10	87860000	87870000	chr10	88130000	88140000		chr10	112050000	112060000	chr10	112420000	112430000		chr10	99220000	99230000	chr10	99480000	99490000		chr10	17390000	17400000	chr10	17470000	17480000		chr10	90450000	90460000	chr10	90690000	90700000
	chr10	35410000	35420000	chr10	35880000	35890000		chr10	92050000	92060000	chr10	92620000	92630000		chr10	4210000	4220000	chr10	4520000	4530000		chr10	112110000	112120000	chr10	112250000	112260000		chr10	99220000	99230000	chr10	99370000	99380000		chr10	75900000	75910000	chr10	75980000	75990000		chr10	90440000	90450000	chr10	90560000	90570000
	chr10	35400000	35410000	chr10	35580000	35590000		chr10	92040000	92050000	chr10	92250000	92260000		chr10	4280000	4290000	chr10	4800000	4810000		chr10	18230000	18240000	chr10	18450000	18460000		chr10	99220000	99230000	chr10	99310000	99320000		chr10	50190000	50200000	chr10	50370000	50380000		chr10	69970000	69980000	chr10	70060000	70070000
	chr10	44970000	44980000	chr10	45350000	45360000		chr10	92040000	92050000	chr10	92340000	92350000		chr10	4290000	4300000	chr10	4380000	4390000		chr10	62070000	62080000	chr10	62400000	62410000		chr10	59090000	59100000	chr10	59600000	59610000		chr10	11860000	11870000	chr10	11940000	11950000		chr10	69970000	69980000	chr10	70100000	70110000
	chr10	62400000	62410000	chr10	62490000	62500000		chr10	92030000	92040000	chr10	92400000	92410000		chr10	4280000	4290000	chr10	4690000	4700000		chr10	105800000	105810000	chr10	105960000	105970000		chr10	59090000	59100000	chr10	59820000	59830000		chr10	122730000	122740000	chr10	122810000	122820000		chr10	3660000	3670000	chr10	4690000	4700000
	chr10	70750000	70760000	chr10	71170000	71180000		chr10	92040000	92050000	chr10	92470000	92480000		chr10	4200000	4210000	chr10	4670000	4680000		chr10	105800000	105810000	chr10	105880000	105890000		chr10	59090000	59100000	chr10	59910000	59920000		chr10	54080000	54090000	chr10	54270000	54280000		chr10	3660000	3670000	chr10	3800000	3810000
	chr10	70720000	70730000	chr10	70960000	70970000		chr10	86020000	86030000	chr10	86290000	86300000		chr10	93050000	93060000	chr10	93660000	93670000		chr10	105770000	105780000	chr10	105880000	105890000		chr10	103930000	103940000	chr10	104100000	104110000		chr10	79820000	79830000	chr10	79910000	79920000		chr10	44800000	44810000	chr10	44880000	44890000
	chr10	70740000	70750000	chr10	70980000	70990000		chr10	86020000	86030000	chr10	86130000	86140000		chr10	93050000	93060000	chr10	93230000	93240000		chr10	120510000	120520000	chr10	120910000	120920000		chr10	103920000	103930000	chr10	104350000	104360000		chr10	54710000	54720000	chr10	54970000	54980000		chr10	44880000	44890000	chr10	45350000	45360000
	chr10	70760000	70770000	chr10	70850000	70860000		chr10	86020000	86030000	chr10	86500000	86510000		chr10	93050000	93060000	chr10	93130000	93140000		chr10	120500000	120510000	chr10	120790000	120800000		chr10	103920000	103930000	chr10	104230000	104240000		chr10	44180000	44190000	chr10	44650000	44660000		chr10	79980000	79990000	chr10	80400000	80410000
	chr10	70720000	70730000	chr10	70850000	70860000		chr10	86000000	86010000	chr10	86470000	86480000		chr10	93050000	93060000	chr10	93500000	93510000		chr10	115710000	115720000	chr10	115850000	115860000		chr10	63500000	63510000	chr10	63990000	64000000		chr10	86400000	86410000	chr10	86480000	86490000		chr10	80060000	80070000	chr10	80820000	80830000
	chr10	83140000	83150000	chr10	83570000	83580000		chr10	102850000	102860000	chr10	103320000	103330000		chr10	93050000	93060000	chr10	93390000	93400000		chr10	60710000	60720000	chr10	61380000	61390000		chr10	63510000	63520000	chr10	63860000	63870000		chr10	78210000	78220000	chr10	78290000	78300000		chr10	79960000	79970000	chr10	80810000	80820000
	chr10	96120000	96130000	chr10	96200000	96210000		chr10	102810000	102820000	chr10	103320000	103330000		chr10	93050000	93060000	chr10	93300000	93310000		chr10	60710000	60720000	chr10	60950000	60960000		chr10	63510000	63520000	chr10	63590000	63600000		chr10	50490000	50500000	chr10	50570000	50580000		chr10	80060000	80070000	chr10	80950000	80960000
	chr10	98590000	98600000	chr10	98680000	98690000		chr10	102810000	102820000	chr10	102900000	102910000		chr10	25240000	25250000	chr10	25350000	25360000		chr10	127840000	127850000	chr10	128190000	128200000		chr10	63510000	63520000	chr10	63650000	63660000		chr10	35620000	35630000	chr10	35700000	35710000		chr10	13400000	13410000	chr10	13480000	13490000
	chr10	77450000	77460000	chr10	78060000	78070000		chr10	15650000	15660000	chr10	15770000	15780000		chr10	25310000	25320000	chr10	26000000	26010000		chr10	116060000	116070000	chr10	116300000	116310000		chr10	21570000	21580000	chr10	21760000	21770000		chr10	114970000	114980000	chr10	115130000	115140000		chr10	13410000	13420000	chr10	13560000	13570000
	chr10	77490000	77500000	chr10	77800000	77810000		chr10	15690000	15700000	chr10	15860000	15870000		chr10	25310000	25320000	chr10	25960000	25970000		chr10	116060000	116070000	chr10	116190000	116200000		chr10	21570000	21580000	chr10	22240000	22250000		chr10	69640000	69650000	chr10	69960000	69970000		chr10	17640000	17650000	chr10	18510000	18520000
	chr10	68690000	68700000	chr10	69260000	69270000		chr10	15910000	15920000	chr10	17360000	17370000		chr10	25310000	25320000	chr10	25510000	25520000		chr10	32340000	32350000	chr10	32630000	32640000		chr10	21560000	21570000	chr10	22010000	22020000		chr10	72300000	72310000	chr10	72440000	72450000		chr10	17640000	17650000	chr10	18390000	18400000
	chr10	68750000	68760000	chr10	69280000	69290000		chr10	15940000	15950000	chr10	16580000	16590000		chr10	57650000	57660000	chr10	58110000	58120000		chr10	32340000	32350000	chr10	32430000	32440000		chr10	45740000	45750000	chr10	45920000	45930000		chr10	45740000	45750000	chr10	45950000	45960000		chr10	74630000	74640000	chr10	74820000	74830000
	chr10	16180000	16190000	chr10	16790000	16800000		chr10	15940000	15950000	chr10	16480000	16490000		chr10	122850000	122860000	chr10	123190000	123200000		chr10	8530000	8540000	chr10	8910000	8920000		chr10	45780000	45790000	chr10	46140000	46150000		chr10	114470000	114480000	chr10	114550000	114560000		chr10	550000	560000	chr10	730000	740000
	chr10	76170000	76180000	chr10	76790000	76800000		chr10	15920000	15930000	chr10	17290000	17300000		chr10	122840000	122850000	chr10	123490000	123500000		chr10	8560000	8570000	chr10	9030000	9040000		chr10	80970000	80980000	chr10	81220000	81230000		chr10	77280000	77290000	chr10	77370000	77380000		chr10	550000	560000	chr10	830000	840000
	chr10	76180000	76190000	chr10	76850000	76860000		chr10	15940000	15950000	chr10	16820000	16830000		chr10	122840000	122850000	chr10	123050000	123060000		chr10	97370000	97380000	chr10	97600000	97610000		chr10	98830000	98840000	chr10	98970000	98980000		chr10	7580000	7590000	chr10	7660000	7670000		chr10	104810000	104820000	chr10	105080000	105090000
	chr10	59930000	59940000	chr10	60160000	60170000		chr10	15920000	15930000	chr10	17630000	17640000		chr10	122840000	122850000	chr10	123250000	123260000		chr10	71270000	71280000	chr10	71480000	71490000		chr10	33300000	33310000	chr10	33440000	33450000		chr10	27740000	27750000	chr10	27820000	27830000		chr10	104870000	104880000	chr10	105000000	105010000
	chr10	59940000	59950000	chr10	60040000	60050000		chr10	15920000	15930000	chr10	16920000	16930000		chr10	122840000	122850000	chr10	123360000	123370000		chr10	71280000	71290000	chr10	71390000	71400000		chr10	550000	560000	chr10	830000	840000		chr10	52960000	52970000	chr10	53040000	53050000		chr10	89300000	89310000	chr10	89490000	89500000
	chr10	14920000	14930000	chr10	15000000	15010000		chr10	134170000	134180000	chr10	134260000	134270000		chr10	122800000	122810000	chr10	123650000	123660000		chr10	22290000	22300000	chr10	23010000	23020000		chr10	91710000	91720000	chr10	92610000	92620000		chr10	82450000	82460000	chr10	82680000	82690000		chr10	26880000	26890000	chr10	26980000	26990000
	chr10	14940000	14950000	chr10	15140000	15150000		chr10	134200000	134210000	chr10	134450000	134460000		chr10	84730000	84740000	chr10	85630000	85640000		chr10	22300000	22310000	chr10	22810000	22820000		chr10	91710000	91720000	chr10	92480000	92490000		chr10	134040000	134050000	chr10	134130000	134140000		chr10	26840000	26850000	chr10	27160000	27170000
	chr10	123690000	123700000	chr10	123800000	123810000		chr10	14540000	14550000	chr10	15000000	15010000		chr10	119680000	119690000	chr10	119990000	120000000		chr10	22290000	22300000	chr10	22720000	22730000		chr10	52170000	52180000	chr10	52380000	52390000		chr10	27060000	27070000	chr10	27140000	27150000		chr10	104580000	104590000	chr10	104660000	104670000
	chr10	123700000	123710000	chr10	123860000	123870000		chr10	14540000	14550000	chr10	15140000	15150000		chr10	119700000	119710000	chr10	120170000	120180000		chr10	22300000	22310000	chr10	22500000	22510000		chr10	43630000	43640000	chr10	43840000	43850000		chr10	124630000	124640000	chr10	124720000	124730000		chr10	104590000	104600000	chr10	105090000	105100000
	chr10	75530000	75540000	chr10	75860000	75870000		chr10	14580000	14590000	chr10	14860000	14870000		chr10	35010000	35020000	chr10	35100000	35110000		chr10	22280000	22290000	chr10	23350000	23360000		chr10	43700000	43710000	chr10	43950000	43960000		chr10	111650000	111660000	chr10	111730000	111740000		chr10	104590000	104600000	chr10	105000000	105010000
	chr10	75530000	75540000	chr10	75630000	75640000		chr10	5320000	5330000	chr10	5420000	5430000		chr10	35000000	35010000	chr10	35250000	35260000		chr10	22290000	22300000	chr10	23270000	23280000		chr10	98540000	98550000	chr10	98780000	98790000		chr10	70360000	70370000	chr10	70440000	70450000		chr10	104590000	104600000	chr10	104820000	104830000
	chr10	72150000	72160000	chr10	72290000	72300000		chr10	5330000	5340000	chr10	5470000	5480000		chr10	57740000	57750000	chr10	58220000	58230000		chr10	124040000	124050000	chr10	124460000	124470000		chr10	98580000	98590000	chr10	98780000	98790000		chr10	28960000	28970000	chr10	29180000	29190000		chr10	104620000	104630000	chr10	104820000	104830000
	chr10	98390000	98400000	chr10	98690000	98700000		chr10	5370000	5380000	chr10	5680000	5690000		chr10	57730000	57740000	chr10	58570000	58580000		chr10	124050000	124060000	chr10	124190000	124200000		chr10	98550000	98560000	chr10	98970000	98980000		chr10	68100000	68110000	chr10	68180000	68190000		chr10	6240000	6250000	chr10	6440000	6450000
	chr10	98410000	98420000	chr10	98570000	98580000		chr10	5360000	5370000	chr10	5800000	5810000		chr10	57750000	57760000	chr10	58120000	58130000		chr10	124050000	124060000	chr10	124320000	124330000		chr10	62910000	62920000	chr10	63470000	63480000		chr10	33530000	33540000	chr10	33610000	33620000		chr10	114900000	114910000	chr10	115270000	115280000
	chr10	98400000	98410000	chr10	98520000	98530000		chr10	58280000	58290000	chr10	58550000	58560000		chr10	81000000	81010000	chr10	81090000	81100000		chr10	3110000	3120000	chr10	3190000	3200000		chr10	62900000	62910000	chr10	63040000	63050000		chr10	59660000	59670000	chr10	59740000	59750000		chr10	114890000	114900000	chr10	115140000	115150000
	chr10	98410000	98420000	chr10	98870000	98880000		chr10	23440000	23450000	chr10	23810000	23820000		chr10	80980000	80990000	chr10	81260000	81270000		chr10	27440000	27450000	chr10	27640000	27650000		chr10	62940000	62950000	chr10	63030000	63040000		chr10	6040000	6050000	chr10	6120000	6130000		chr10	121360000	121370000	chr10	121610000	121620000
	chr10	98400000	98410000	chr10	98950000	98960000		chr10	23440000	23450000	chr10	23770000	23780000		chr10	61990000	62000000	chr10	62090000	62100000		chr10	50790000	50800000	chr10	51030000	51040000		chr10	62890000	62900000	chr10	63650000	63660000		chr10	74930000	74940000	chr10	75010000	75020000		chr10	121360000	121370000	chr10	121480000	121490000
	chr10	111890000	111900000	chr10	112300000	112310000		chr10	23440000	23450000	chr10	23990000	24000000		chr10	62000000	62010000	chr10	62390000	62400000		chr10	50810000	50820000	chr10	50970000	50980000		chr10	92840000	92850000	chr10	93010000	93020000		chr10	97120000	97130000	chr10	97200000	97210000		chr10	64190000	64200000	chr10	64580000	64590000
	chr10	111890000	111900000	chr10	112030000	112040000		chr10	23440000	23450000	chr10	23910000	23920000		chr10	61990000	62000000	chr10	62190000	62200000		chr10	50800000	50810000	chr10	51820000	51830000		chr10	43250000	43260000	chr10	43590000	43600000		chr10	105880000	105890000	chr10	105970000	105980000		chr10	64200000	64210000	chr10	64330000	64340000
	chr10	78300000	78310000	chr10	78760000	78770000		chr10	23440000	23450000	chr10	24840000	24850000		chr10	62010000	62020000	chr10	62520000	62530000		chr10	50800000	50810000	chr10	51120000	51130000		chr10	43260000	43270000	chr10	43530000	43540000		chr10	116300000	116310000	chr10	116610000	116620000		chr10	64240000	64250000	chr10	64840000	64850000
	chr10	78300000	78310000	chr10	78860000	78870000		chr10	23440000	23450000	chr10	24490000	24500000		chr10	120210000	120220000	chr10	120300000	120310000		chr10	112510000	112520000	chr10	112650000	112660000		chr10	43270000	43280000	chr10	43950000	43960000		chr10	70250000	70260000	chr10	70480000	70490000		chr10	64190000	64200000	chr10	64910000	64920000
	chr10	28930000	28940000	chr10	29650000	29660000		chr10	23440000	23450000	chr10	23580000	23590000		chr10	90590000	90600000	chr10	90690000	90700000		chr10	112490000	112500000	chr10	112840000	112850000		chr10	101190000	101200000	chr10	101370000	101380000		chr10	102480000	102490000	chr10	102630000	102640000		chr10	71270000	71280000	chr10	71470000	71480000
	chr10	28960000	28970000	chr10	29280000	29290000		chr10	16880000	16890000	chr10	17470000	17480000		chr10	90590000	90600000	chr10	90970000	90980000		chr10	113930000	113940000	chr10	114060000	114070000		chr10	101190000	101200000	chr10	101460000	101470000		chr10	3940000	3950000	chr10	4100000	4110000		chr10	71270000	71280000	chr10	71390000	71400000
	chr10	28960000	28970000	chr10	29170000	29180000		chr10	16890000	16900000	chr10	17360000	17370000		chr10	90590000	90600000	chr10	90740000	90750000		chr10	113920000	113930000	chr10	114200000	114210000		chr10	101150000	101160000	chr10	101470000	101480000		chr10	53170000	53180000	chr10	53710000	53720000		chr10	71280000	71290000	chr10	71670000	71680000
	chr10	28950000	28960000	chr10	29410000	29420000		chr10	16880000	16890000	chr10	17550000	17560000		chr10	101600000	101610000	chr10	101990000	102000000		chr10	1220000	1230000	chr10	1400000	1410000		chr10	127660000	127670000	chr10	127900000	127910000		chr10	73560000	73570000	chr10	73650000	73660000		chr10	69420000	69430000	chr10	69530000	69540000
	chr10	28910000	28920000	chr10	29590000	29600000		chr10	16880000	16890000	chr10	17290000	17300000		chr10	101660000	101670000	chr10	101940000	101950000		chr10	80830000	80840000	chr10	80940000	80950000		chr10	127660000	127670000	chr10	128190000	128200000		chr10	123500000	123510000	chr10	123640000	123650000		chr10	105650000	105660000	chr10	105750000	105760000
	chr10	77160000	77170000	chr10	77640000	77650000		chr10	16940000	16950000	chr10	17210000	17220000		chr10	101600000	101610000	chr10	102170000	102180000		chr10	3600000	3610000	chr10	3810000	3820000		chr10	127680000	127690000	chr10	127850000	127860000		chr10	92900000	92910000	chr10	92980000	92990000		chr10	105640000	105650000	chr10	105880000	105890000
	chr10	77160000	77170000	chr10	78060000	78070000		chr10	16900000	16910000	chr10	17180000	17190000		chr10	101660000	101670000	chr10	101800000	101810000		chr10	99560000	99570000	chr10	99780000	99790000		chr10	127660000	127670000	chr10	128430000	128440000		chr10	4890000	4900000	chr10	4990000	5000000		chr10	105630000	105640000	chr10	105960000	105970000
	chr10	77160000	77170000	chr10	77780000	77790000		chr10	16870000	16880000	chr10	18520000	18530000		chr10	101620000	101630000	chr10	101850000	101860000		chr10	99550000	99560000	chr10	99630000	99640000		chr10	127670000	127680000	chr10	128070000	128080000		chr10	125150000	125160000	chr10	125310000	125320000		chr10	98590000	98600000	chr10	98780000	98790000
	chr10	77160000	77170000	chr10	77500000	77510000		chr10	16880000	16890000	chr10	17050000	17060000		chr10	52310000	52320000	chr10	52400000	52410000		chr10	122850000	122860000	chr10	123250000	123260000		chr10	127660000	127670000	chr10	128020000	128030000		chr10	113900000	113910000	chr10	114060000	114070000		chr10	22730000	22740000	chr10	22860000	22870000
	chr10	77160000	77170000	chr10	77380000	77390000		chr10	16880000	16890000	chr10	17630000	17640000		chr10	92040000	92050000	chr10	92620000	92630000		chr10	122810000	122820000	chr10	123500000	123510000		chr10	102090000	102100000	chr10	102270000	102280000		chr10	98680000	98690000	chr10	98760000	98770000		chr10	22720000	22730000	chr10	23280000	23290000
	chr10	74110000	74120000	chr10	74610000	74620000		chr10	122180000	122190000	chr10	122600000	122610000		chr10	91990000	92000000	chr10	92610000	92620000		chr10	122870000	122880000	chr10	123360000	123370000		chr10	102100000	102110000	chr10	102630000	102640000		chr10	9260000	9270000	chr10	9340000	9350000		chr10	99520000	99530000	chr10	99800000	99810000
	chr10	74120000	74130000	chr10	74790000	74800000		chr10	122180000	122190000	chr10	122340000	122350000		chr10	92040000	92050000	chr10	92350000	92360000		chr10	48470000	48480000	chr10	48650000	48660000		chr10	102100000	102110000	chr10	102190000	102200000		chr10	124800000	124810000	chr10	124880000	124890000		chr10	99550000	99560000	chr10	99630000	99640000
	chr10	74120000	74130000	chr10	74920000	74930000		chr10	122170000	122180000	chr10	122510000	122520000		chr10	92140000	92150000	chr10	92320000	92330000		chr10	114390000	114400000	chr10	114880000	114890000		chr10	90450000	90460000	chr10	90620000	90630000		chr10	109170000	109180000	chr10	109250000	109260000		chr10	70730000	70740000	chr10	70920000	70930000
	chr10	74130000	74140000	chr10	74220000	74230000		chr10	91910000	91920000	chr10	92040000	92050000		chr10	92040000	92050000	chr10	92400000	92410000		chr10	25000000	25010000	chr10	25360000	25370000		chr10	90460000	90470000	chr10	90560000	90570000		chr10	5320000	5330000	chr10	5420000	5430000		chr10	70760000	70770000	chr10	70850000	70860000
	chr10	74150000	74160000	chr10	74420000	74430000		chr10	91910000	91920000	chr10	92180000	92190000		chr10	92050000	92060000	chr10	92460000	92470000		chr10	25010000	25020000	chr10	25230000	25240000		chr10	90440000	90450000	chr10	90970000	90980000		chr10	15670000	15680000	chr10	15750000	15760000		chr10	70720000	70730000	chr10	71150000	71160000
	chr10	74120000	74130000	chr10	74710000	74720000		chr10	91920000	91930000	chr10	92610000	92620000		chr10	14230000	14240000	chr10	14520000	14530000		chr10	25010000	25020000	chr10	25100000	25110000		chr10	111890000	111900000	chr10	112040000	112050000		chr10	64340000	64350000	chr10	64840000	64850000		chr10	35630000	35640000	chr10	35760000	35770000
	chr10	74120000	74130000	chr10	74530000	74540000		chr10	91920000	91930000	chr10	92340000	92350000		chr10	14230000	14240000	chr10	14870000	14880000		chr10	72220000	72230000	chr10	72300000	72310000		chr10	111880000	111890000	chr10	112330000	112340000		chr10	89940000	89950000	chr10	90150000	90160000		chr10	35640000	35650000	chr10	35850000	35860000
	chr10	74130000	74140000	chr10	74300000	74310000		chr10	133340000	133350000	chr10	133600000	133610000		chr10	14250000	14260000	chr10	14340000	14350000		chr10	72230000	72240000	chr10	72510000	72520000		chr10	111890000	111900000	chr10	112280000	112290000		chr10	73280000	73290000	chr10	73450000	73460000		chr10	24980000	24990000	chr10	25370000	25380000
	chr10	105170000	105180000	chr10	105250000	105260000		chr10	48430000	48440000	chr10	48660000	48670000		chr10	84550000	84560000	chr10	84720000	84730000		chr10	4860000	4870000	chr10	5660000	5670000		chr10	105470000	105480000	chr10	105610000	105620000		chr10	76630000	76640000	chr10	76780000	76790000		chr10	25010000	25020000	chr10	25270000	25280000
	chr10	105160000	105170000	chr10	105310000	105320000		chr10	48430000	48440000	chr10	48550000	48560000		chr10	84560000	84570000	chr10	85850000	85860000		chr10	4860000	4870000	chr10	5470000	5480000		chr10	105470000	105480000	chr10	105960000	105970000		chr10	54710000	54720000	chr10	54790000	54800000		chr10	25010000	25020000	chr10	25150000	25160000
	chr10	105160000	105170000	chr10	105430000	105440000		chr10	28970000	28980000	chr10	29170000	29180000		chr10	84550000	84560000	chr10	85630000	85640000		chr10	4870000	4880000	chr10	5240000	5250000		chr10	127850000	127860000	chr10	128190000	128200000		chr10	63050000	63060000	chr10	63200000	63210000		chr10	114590000	114600000	chr10	114890000	114900000
	chr10	116060000	116070000	chr10	116300000	116310000		chr10	28950000	28960000	chr10	29590000	29600000		chr10	32120000	32130000	chr10	32480000	32490000		chr10	4870000	4880000	chr10	5120000	5130000		chr10	127740000	127750000	chr10	128180000	128190000		chr10	76030000	76040000	chr10	76180000	76190000		chr10	94840000	94850000	chr10	95040000	95050000
	chr10	116060000	116070000	chr10	116180000	116190000		chr10	28950000	28960000	chr10	29410000	29420000		chr10	32150000	32160000	chr10	32230000	32240000		chr10	4890000	4900000	chr10	5300000	5310000		chr10	127800000	127810000	chr10	128190000	128200000		chr10	122510000	122520000	chr10	122590000	122600000		chr10	94840000	94850000	chr10	95110000	95120000
	chr10	116050000	116060000	chr10	116590000	116600000		chr10	28930000	28940000	chr10	29720000	29730000		chr10	3850000	3860000	chr10	3970000	3980000		chr10	93390000	93400000	chr10	93650000	93660000		chr10	127840000	127850000	chr10	128430000	128440000		chr10	126430000	126440000	chr10	126520000	126530000		chr10	94840000	94850000	chr10	95260000	95270000
	chr10	28150000	28160000	chr10	28650000	28660000		chr10	28950000	28960000	chr10	29270000	29280000		chr10	3880000	3890000	chr10	4000000	4010000		chr10	93400000	93410000	chr10	93500000	93510000		chr10	127860000	127870000	chr10	128070000	128080000		chr10	124760000	124770000	chr10	124910000	124920000		chr10	8040000	8050000	chr10	9240000	9250000
	chr10	117100000	117110000	chr10	117180000	117190000		chr10	28930000	28940000	chr10	29510000	29520000		chr10	3820000	3830000	chr10	4560000	4570000		chr10	50610000	50620000	chr10	50720000	50730000		chr10	127800000	127810000	chr10	128060000	128070000		chr10	80730000	80740000	chr10	80820000	80830000		chr10	8100000	8110000	chr10	8390000	8400000
	chr10	117110000	117120000	chr10	117320000	117330000		chr10	95460000	95470000	chr10	95570000	95580000		chr10	3830000	3840000	chr10	4230000	4240000		chr10	50610000	50620000	chr10	51020000	51030000		chr10	64250000	64260000	chr10	64840000	64850000		chr10	120660000	120670000	chr10	120740000	120750000		chr10	8090000	8100000	chr10	9340000	9350000
	chr10	115150000	115160000	chr10	115290000	115300000		chr10	95450000	95460000	chr10	95610000	95620000		chr10	3830000	3840000	chr10	4160000	4170000		chr10	98280000	98290000	chr10	98590000	98600000		chr10	64200000	64210000	chr10	64580000	64590000		chr10	4970000	4980000	chr10	5060000	5070000		chr10	8100000	8110000	chr10	8910000	8920000
	chr10	44880000	44890000	chr10	45350000	45360000		chr10	28070000	28080000	chr10	28470000	28480000		chr10	3870000	3880000	chr10	4170000	4180000		chr10	6150000	6160000	chr10	6440000	6450000		chr10	99670000	99680000	chr10	99800000	99810000		chr10	32230000	32240000	chr10	32340000	32350000		chr10	30280000	30290000	chr10	30680000	30690000
	chr10	105650000	105660000	chr10	105970000	105980000		chr10	27960000	27970000	chr10	28510000	28520000		chr10	3820000	3830000	chr10	4800000	4810000		chr10	6150000	6160000	chr10	6240000	6250000		chr10	99680000	99690000	chr10	100060000	100070000		chr10	25280000	25290000	chr10	25360000	25370000		chr10	30280000	30290000	chr10	30520000	30530000
	chr10	105650000	105660000	chr10	105740000	105750000		chr10	27980000	27990000	chr10	28430000	28440000		chr10	3930000	3940000	chr10	4800000	4810000		chr10	50190000	50200000	chr10	50730000	50740000		chr10	69690000	69700000	chr10	70060000	70070000		chr10	69650000	69660000	chr10	69730000	69740000		chr10	30280000	30290000	chr10	30820000	30830000
	chr10	44190000	44200000	chr10	44700000	44710000		chr10	28070000	28080000	chr10	28290000	28300000		chr10	3850000	3860000	chr10	4390000	4400000		chr10	50180000	50190000	chr10	50580000	50590000		chr10	69690000	69700000	chr10	69810000	69820000		chr10	3290000	3300000	chr10	3370000	3380000		chr10	93050000	93060000	chr10	93450000	93460000
	chr10	44170000	44180000	chr10	44880000	44890000		chr10	28030000	28040000	chr10	28670000	28680000		chr10	3960000	3970000	chr10	4380000	4390000		chr10	75740000	75750000	chr10	75830000	75840000		chr10	17650000	17660000	chr10	18500000	18510000		chr10	81320000	81330000	chr10	81790000	81800000		chr10	93060000	93070000	chr10	93310000	93320000
	chr10	44170000	44180000	chr10	45360000	45370000		chr10	102970000	102980000	chr10	103200000	103210000		chr10	3820000	3830000	chr10	4690000	4700000		chr10	80430000	80440000	chr10	80960000	80970000		chr10	17640000	17650000	chr10	18400000	18410000		chr10	4220000	4230000	chr10	4300000	4310000		chr10	93060000	93070000	chr10	93390000	93400000
	chr10	44190000	44200000	chr10	44420000	44430000		chr10	102970000	102980000	chr10	103050000	103060000		chr10	3840000	3850000	chr10	3930000	3940000		chr10	80340000	80350000	chr10	80970000	80980000		chr10	11830000	11840000	chr10	12020000	12030000		chr10	76480000	76490000	chr10	76560000	76570000		chr10	93060000	93070000	chr10	93140000	93150000
	chr10	44190000	44200000	chr10	44290000	44300000		chr10	102970000	102980000	chr10	103320000	103330000		chr10	3820000	3830000	chr10	4280000	4290000		chr10	129520000	129530000	chr10	129860000	129870000		chr10	17310000	17320000	chr10	17450000	17460000		chr10	67720000	67730000	chr10	67800000	67810000		chr10	3290000	3300000	chr10	3500000	3510000
	chr10	44190000	44200000	chr10	44540000	44550000		chr10	102960000	102970000	chr10	103540000	103550000		chr10	3970000	3980000	chr10	4290000	4300000		chr10	129520000	129530000	chr10	129630000	129640000		chr10	5130000	5140000	chr10	5400000	5410000		chr10	112860000	112870000	chr10	112940000	112950000		chr10	3280000	3290000	chr10	3880000	3890000
	chr10	44170000	44180000	chr10	44810000	44820000		chr10	35410000	35420000	chr10	35620000	35630000		chr10	113900000	113910000	chr10	114060000	114070000		chr10	1780000	1790000	chr10	2410000	2420000		chr10	5130000	5140000	chr10	5320000	5330000		chr10	8090000	8100000	chr10	8170000	8180000		chr10	3270000	3280000	chr10	4000000	4010000
	chr10	34530000	34540000	chr10	34900000	34910000		chr10	35400000	35410000	chr10	35680000	35690000		chr10	113900000	113910000	chr10	114190000	114200000		chr10	81900000	81910000	chr10	81980000	81990000		chr10	134030000	134040000	chr10	134160000	134170000		chr10	13840000	13850000	chr10	13920000	13930000		chr10	3280000	3290000	chr10	4700000	4710000
	chr10	35910000	35920000	chr10	36200000	36210000		chr10	35400000	35410000	chr10	35880000	35890000		chr10	31360000	31370000	chr10	31760000	31770000		chr10	970000	980000	chr10	1050000	1060000		chr10	134040000	134050000	chr10	134260000	134270000		chr10	6620000	6630000	chr10	6700000	6710000		chr10	3270000	3280000	chr10	3690000	3700000
	chr10	35920000	35930000	chr10	36880000	36890000		chr10	35410000	35420000	chr10	35500000	35510000		chr10	31360000	31370000	chr10	31600000	31610000		chr10	970000	980000	chr10	1100000	1110000		chr10	134030000	134040000	chr10	134460000	134470000		chr10	37260000	37270000	chr10	37340000	37350000		chr10	3240000	3250000	chr10	4810000	4820000
	chr10	35910000	35920000	chr10	37070000	37080000		chr10	35410000	35420000	chr10	37150000	37160000		chr10	32910000	32920000	chr10	33130000	33140000		chr10	99940000	99950000	chr10	100070000	100080000		chr10	103370000	103380000	chr10	103540000	103550000		chr10	14710000	14720000	chr10	14850000	14860000		chr10	3280000	3290000	chr10	3580000	3590000
	chr10	35920000	35930000	chr10	36030000	36040000		chr10	35390000	35400000	chr10	35720000	35730000		chr10	32940000	32950000	chr10	33460000	33470000		chr10	114730000	114740000	chr10	114870000	114880000		chr10	76790000	76800000	chr10	77000000	77010000		chr10	33210000	33220000	chr10	33290000	33300000		chr10	3280000	3290000	chr10	3810000	3820000
	chr10	35920000	35930000	chr10	37160000	37170000		chr10	42840000	42850000	chr10	43030000	43040000		chr10	8930000	8940000	chr10	9320000	9330000		chr10	114670000	114680000	chr10	115150000	115160000		chr10	89620000	89630000	chr10	90140000	90150000		chr10	74130000	74140000	chr10	74310000	74320000		chr10	113940000	113950000	chr10	114190000	114200000
	chr10	55360000	55370000	chr10	56160000	56170000		chr10	15470000	15480000	chr10	15760000	15770000		chr10	8920000	8930000	chr10	9220000	9230000		chr10	93140000	93150000	chr10	93500000	93510000		chr10	89610000	89620000	chr10	90000000	90010000		chr10	112390000	112400000	chr10	112650000	112660000		chr10	113940000	113950000	chr10	114070000	114080000
	chr10	55370000	55380000	chr10	55730000	55740000		chr10	15460000	15470000	chr10	16820000	16830000		chr10	8880000	8890000	chr10	9250000	9260000		chr10	126220000	126230000	chr10	126420000	126430000		chr10	89600000	89610000	chr10	90560000	90570000		chr10	100230000	100240000	chr10	101060000	101070000		chr10	90590000	90600000	chr10	90690000	90700000
	chr10	55340000	55350000	chr10	55720000	55730000		chr10	112070000	112080000	chr10	112300000	112310000		chr10	107550000	107560000	chr10	107930000	107940000		chr10	126230000	126240000	chr10	126510000	126520000		chr10	89640000	89650000	chr10	89720000	89730000		chr10	12080000	12090000	chr10	12160000	12170000		chr10	90590000	90600000	chr10	90740000	90750000
	chr10	55360000	55370000	chr10	55570000	55580000		chr10	112060000	112070000	chr10	112420000	112430000		chr10	107580000	107590000	chr10	107680000	107690000		chr10	126220000	126230000	chr10	126650000	126660000		chr10	89610000	89620000	chr10	90430000	90440000		chr10	56840000	56850000	chr10	57020000	57030000		chr10	90590000	90600000	chr10	90970000	90980000
	chr10	32300000	32310000	chr10	32620000	32630000		chr10	4140000	4150000	chr10	4690000	4700000		chr10	107550000	107560000	chr10	108120000	108130000		chr10	3490000	3500000	chr10	3970000	3980000		chr10	89620000	89630000	chr10	89800000	89810000		chr10	23050000	23060000	chr10	23260000	23270000		chr10	4240000	4250000	chr10	4690000	4700000
	chr10	32340000	32350000	chr10	32420000	32430000		chr10	3950000	3960000	chr10	4100000	4110000		chr10	26160000	26170000	chr10	26840000	26850000		chr10	3500000	3510000	chr10	3660000	3670000		chr10	89610000	89620000	chr10	90060000	90070000		chr10	74120000	74130000	chr10	74520000	74530000		chr10	4220000	4230000	chr10	4380000	4390000
	chr10	101500000	101510000	chr10	101860000	101870000		chr10	3970000	3980000	chr10	4190000	4200000		chr10	26160000	26170000	chr10	26550000	26560000		chr10	3510000	3520000	chr10	3810000	3820000		chr10	89610000	89620000	chr10	90310000	90320000		chr10	50230000	50240000	chr10	50310000	50320000		chr10	4240000	4250000	chr10	4800000	4810000
	chr10	101490000	101500000	chr10	101590000	101600000		chr10	3950000	3960000	chr10	4290000	4300000		chr10	105360000	105370000	chr10	105790000	105800000		chr10	25390000	25400000	chr10	25510000	25520000		chr10	89620000	89630000	chr10	89870000	89880000		chr10	100230000	100240000	chr10	100420000	100430000		chr10	27840000	27850000	chr10	27940000	27950000
	chr10	32420000	32430000	chr10	32620000	32630000		chr10	4030000	4040000	chr10	4830000	4840000		chr10	105350000	105360000	chr10	105750000	105760000		chr10	25390000	25400000	chr10	25990000	26000000		chr10	99550000	99560000	chr10	99630000	99640000		chr10	92660000	92670000	chr10	92760000	92770000		chr10	27830000	27840000	chr10	28530000	28540000
	chr10	94430000	94440000	chr10	94800000	94810000		chr10	3990000	4000000	chr10	4820000	4830000		chr10	105360000	105370000	chr10	105440000	105450000		chr10	73450000	73460000	chr10	73650000	73660000		chr10	99490000	99500000	chr10	99620000	99630000		chr10	86620000	86630000	chr10	86700000	86710000		chr10	27840000	27850000	chr10	28670000	28680000
	chr10	94450000	94460000	chr10	94620000	94630000		chr10	4010000	4020000	chr10	4380000	4390000		chr10	105360000	105370000	chr10	105630000	105640000		chr10	73460000	73470000	chr10	73570000	73580000		chr10	99540000	99550000	chr10	99800000	99810000		chr10	78940000	78950000	chr10	79200000	79210000		chr10	27840000	27850000	chr10	28460000	28470000
	chr10	52040000	52050000	chr10	52170000	52180000		chr10	26010000	26020000	chr10	26840000	26850000		chr10	119350000	119360000	chr10	120010000	120020000		chr10	35280000	35290000	chr10	35500000	35510000		chr10	104140000	104150000	chr10	104340000	104350000		chr10	78780000	78790000	chr10	78860000	78870000		chr10	98520000	98530000	chr10	98780000	98790000
	chr10	52040000	52050000	chr10	52390000	52400000		chr10	26040000	26050000	chr10	26550000	26560000		chr10	90710000	90720000	chr10	90900000	90910000		chr10	30020000	30030000	chr10	30150000	30160000		chr10	104150000	104160000	chr10	104230000	104240000		chr10	77150000	77160000	chr10	77790000	77800000		chr10	4700000	4710000	chr10	4800000	4810000
	chr10	89710000	89720000	chr10	90140000	90150000		chr10	26050000	26060000	chr10	26140000	26150000		chr10	90690000	90700000	chr10	90780000	90790000		chr10	30020000	30030000	chr10	30280000	30290000		chr10	121370000	121380000	chr10	121620000	121630000		chr10	28960000	28970000	chr10	29350000	29360000		chr10	20110000	20120000	chr10	20350000	20360000
	chr10	94250000	94260000	chr10	94330000	94340000		chr10	4860000	4870000	chr10	5470000	5480000		chr10	90690000	90700000	chr10	90970000	90980000		chr10	26990000	27000000	chr10	27410000	27420000		chr10	35400000	35410000	chr10	35840000	35850000		chr10	64860000	64870000	chr10	65480000	65490000		chr10	20110000	20120000	chr10	20190000	20200000
	chr10	77970000	77980000	chr10	78050000	78060000		chr10	4860000	4870000	chr10	5790000	5800000		chr10	90720000	90730000	chr10	91150000	91160000		chr10	26960000	26970000	chr10	27620000	27630000		chr10	35410000	35420000	chr10	35500000	35510000		chr10	100840000	100850000	chr10	100960000	100970000		chr10	20100000	20110000	chr10	20540000	20550000
	chr10	101210000	101220000	chr10	101360000	101370000		chr10	4850000	4860000	chr10	5650000	5660000		chr10	37410000	37420000	chr10	37780000	37790000		chr10	27010000	27020000	chr10	27170000	27180000		chr10	74450000	74460000	chr10	74590000	74600000		chr10	26730000	26740000	chr10	26810000	26820000		chr10	72230000	72240000	chr10	72520000	72530000
	chr10	101190000	101200000	chr10	101460000	101470000		chr10	4890000	4900000	chr10	5020000	5030000		chr10	37410000	37420000	chr10	37520000	37530000		chr10	123900000	123910000	chr10	124190000	124200000		chr10	114980000	114990000	chr10	115270000	115280000		chr10	7740000	7750000	chr10	7820000	7830000		chr10	72220000	72230000	chr10	72640000	72650000
	chr10	101230000	101240000	chr10	101310000	101320000		chr10	4890000	4900000	chr10	5130000	5140000		chr10	36060000	36070000	chr10	36280000	36290000		chr10	123910000	123920000	chr10	124330000	124340000		chr10	114970000	114980000	chr10	115130000	115140000		chr10	44180000	44190000	chr10	44450000	44460000		chr10	72210000	72220000	chr10	72410000	72420000
	chr10	62310000	62320000	chr10	62400000	62410000		chr10	4870000	4880000	chr10	5230000	5240000		chr10	36060000	36070000	chr10	37150000	37160000		chr10	123900000	123910000	chr10	124020000	124030000		chr10	61390000	61400000	chr10	61790000	61800000		chr10	90330000	90340000	chr10	90570000	90580000		chr10	72220000	72230000	chr10	72300000	72310000
	chr10	62300000	62310000	chr10	62520000	62530000		chr10	4890000	4900000	chr10	5320000	5330000		chr10	126220000	126230000	chr10	126420000	126430000		chr10	98390000	98400000	chr10	98570000	98580000		chr10	61380000	61390000	chr10	61660000	61670000		chr10	53840000	53850000	chr10	53920000	53930000		chr10	94760000	94770000	chr10	95040000	95050000
	chr10	38260000	38270000	chr10	38640000	38650000		chr10	80620000	80630000	chr10	80800000	80810000		chr10	126210000	126220000	chr10	126680000	126690000		chr10	98380000	98390000	chr10	98780000	98790000		chr10	61390000	61400000	chr10	61560000	61570000		chr10	7450000	7460000	chr10	7540000	7550000		chr10	93610000	93620000	chr10	94200000	94210000
	chr10	31620000	31630000	chr10	32060000	32070000		chr10	80540000	80550000	chr10	80820000	80830000		chr10	126210000	126220000	chr10	126510000	126520000		chr10	62300000	62310000	chr10	62390000	62400000		chr10	76870000	76880000	chr10	76950000	76960000		chr10	116640000	116650000	chr10	116850000	116860000		chr10	93580000	93590000	chr10	93670000	93680000
	chr10	104150000	104160000	chr10	104230000	104240000		chr10	80500000	80510000	chr10	80960000	80970000		chr10	118980000	118990000	chr10	119210000	119220000		chr10	62320000	62330000	chr10	62520000	62530000		chr10	89720000	89730000	chr10	90140000	90150000		chr10	5820000	5830000	chr10	5910000	5920000		chr10	134030000	134040000	chr10	134260000	134270000
	chr10	104140000	104150000	chr10	104350000	104360000		chr10	960000	970000	chr10	1040000	1050000		chr10	118960000	118970000	chr10	119420000	119430000		chr10	98840000	98850000	chr10	98950000	98960000		chr10	89730000	89740000	chr10	89810000	89820000		chr10	60700000	60710000	chr10	60940000	60950000		chr10	134030000	134040000	chr10	134160000	134170000
	chr10	92440000	92450000	chr10	92620000	92630000		chr10	82460000	82470000	chr10	82770000	82780000		chr10	118980000	118990000	chr10	119070000	119080000		chr10	124880000	124890000	chr10	125310000	125320000		chr10	89730000	89740000	chr10	89900000	89910000		chr10	34600000	34610000	chr10	34680000	34690000		chr10	134030000	134040000	chr10	134450000	134460000
	chr10	103430000	103440000	chr10	103530000	103540000		chr10	82450000	82460000	chr10	82680000	82690000		chr10	118970000	118980000	chr10	120000000	120010000		chr10	124890000	124900000	chr10	125130000	125140000		chr10	105900000	105910000	chr10	105980000	105990000		chr10	8700000	8710000	chr10	8900000	8910000		chr10	134090000	134100000	chr10	134460000	134470000
	chr10	54700000	54710000	chr10	55330000	55340000		chr10	82460000	82470000	chr10	82610000	82620000		chr10	1050000	1060000	chr10	3160000	3170000		chr10	13740000	13750000	chr10	13820000	13830000		chr10	6950000	6960000	chr10	7150000	7160000		chr10	121350000	121360000	chr10	121600000	121610000		chr10	94270000	94280000	chr10	94640000	94650000
	chr10	54720000	54730000	chr10	54850000	54860000		chr10	14360000	14370000	chr10	14510000	14520000		chr10	117190000	117200000	chr10	118140000	118150000		chr10	106060000	106070000	chr10	106380000	106390000		chr10	6960000	6970000	chr10	7450000	7460000		chr10	64120000	64130000	chr10	64200000	64210000		chr10	73070000	73080000	chr10	73550000	73560000
	chr10	54700000	54710000	chr10	54960000	54970000		chr10	4430000	4440000	chr10	4690000	4700000		chr10	117190000	117200000	chr10	118040000	118050000		chr10	23490000	23500000	chr10	23570000	23580000		chr10	6960000	6970000	chr10	7310000	7320000		chr10	25540000	25550000	chr10	25700000	25710000		chr10	73070000	73080000	chr10	73270000	73280000
	chr10	54710000	54720000	chr10	55600000	55610000		chr10	4400000	4410000	chr10	4510000	4520000		chr10	117200000	117210000	chr10	117330000	117340000		chr10	23430000	23440000	chr10	24260000	24270000		chr10	6870000	6880000	chr10	7300000	7310000		chr10	4890000	4900000	chr10	5180000	5190000		chr10	73070000	73080000	chr10	73460000	73470000
	chr10	79610000	79620000	chr10	79730000	79740000		chr10	4400000	4410000	chr10	4540000	4550000		chr10	117220000	117230000	chr10	117420000	117430000		chr10	23440000	23450000	chr10	23990000	24000000		chr10	22510000	22520000	chr10	22590000	22600000		chr10	126510000	126520000	chr10	126600000	126610000		chr10	73070000	73080000	chr10	73330000	73340000
	chr10	129670000	129680000	chr10	129940000	129950000		chr10	4440000	4450000	chr10	4820000	4830000		chr10	107240000	107250000	chr10	107440000	107450000		chr10	23440000	23450000	chr10	24230000	24240000		chr10	22510000	22520000	chr10	22710000	22720000		chr10	36100000	36110000	chr10	36180000	36190000		chr10	73070000	73080000	chr10	73650000	73660000
	chr10	129700000	129710000	chr10	129800000	129810000		chr10	87750000	87760000	chr10	88130000	88140000		chr10	130300000	130310000	chr10	130650000	130660000		chr10	23730000	23740000	chr10	23810000	23820000		chr10	22540000	22550000	chr10	23270000	23280000		chr10	135130000	135140000	chr10	135330000	135340000		chr10	73140000	73150000	chr10	73570000	73580000
	chr10	100080000	100090000	chr10	100160000	100170000		chr10	126750000	126760000	chr10	126840000	126850000		chr10	9140000	9150000	chr10	9320000	9330000		chr10	23740000	23750000	chr10	23980000	23990000		chr10	93510000	93520000	chr10	93660000	93670000		chr10	105030000	105040000	chr10	105110000	105120000		chr10	73150000	73160000	chr10	73230000	73240000
	chr10	6620000	6630000	chr10	7450000	7460000		chr10	126730000	126740000	chr10	126950000	126960000		chr10	48540000	48550000	chr10	48640000	48650000		chr10	123380000	123390000	chr10	123650000	123660000		chr10	94250000	94260000	chr10	94330000	94340000		chr10	91550000	91560000	chr10	92530000	92540000		chr10	73150000	73160000	chr10	73460000	73470000
	chr10	6620000	6630000	chr10	6700000	6710000		chr10	126690000	126700000	chr10	127320000	127330000		chr10	16880000	16890000	chr10	18520000	18530000		chr10	123370000	123380000	chr10	123460000	123470000		chr10	94270000	94280000	chr10	94630000	94640000		chr10	132710000	132720000	chr10	132800000	132810000		chr10	73150000	73160000	chr10	73330000	73340000
	chr10	6640000	6650000	chr10	7340000	7350000		chr10	126710000	126720000	chr10	127400000	127410000		chr10	16860000	16870000	chr10	17630000	17640000		chr10	89300000	89310000	chr10	89530000	89540000		chr10	125750000	125760000	chr10	126190000	126200000		chr10	78110000	78120000	chr10	78290000	78300000		chr10	61670000	61680000	chr10	61750000	61760000
	chr10	104670000	104680000	chr10	104810000	104820000		chr10	126730000	126740000	chr10	127060000	127070000		chr10	16880000	16890000	chr10	17290000	17300000		chr10	64600000	64610000	chr10	64900000	64910000		chr10	125770000	125780000	chr10	125850000	125860000		chr10	32650000	32660000	chr10	32730000	32740000		chr10	112170000	112180000	chr10	112250000	112260000
	chr10	104680000	104690000	chr10	105010000	105020000		chr10	94840000	94850000	chr10	95040000	95050000		chr10	16880000	16890000	chr10	17470000	17480000		chr10	64020000	64030000	chr10	64120000	64130000		chr10	125750000	125760000	chr10	125960000	125970000		chr10	8660000	8670000	chr10	8750000	8760000		chr10	112160000	112170000	chr10	112300000	112310000
	chr10	104730000	104740000	chr10	105020000	105030000		chr10	94870000	94880000	chr10	94970000	94980000		chr10	16870000	16880000	chr10	17380000	17390000		chr10	64030000	64040000	chr10	64330000	64340000		chr10	125750000	125760000	chr10	126070000	126080000		chr10	31600000	31610000	chr10	31690000	31700000		chr10	63030000	63040000	chr10	63630000	63640000
	chr10	7060000	7070000	chr10	7450000	7460000		chr10	94830000	94840000	chr10	95260000	95270000		chr10	16930000	16940000	chr10	17050000	17060000		chr10	69970000	69980000	chr10	70060000	70070000		chr10	32480000	32490000	chr10	32650000	32660000		chr10	59070000	59080000	chr10	59150000	59160000		chr10	63040000	63050000	chr10	63490000	63500000
	chr10	24560000	24570000	chr10	24800000	24810000		chr10	94830000	94840000	chr10	95440000	95450000		chr10	16880000	16890000	chr10	17160000	17170000		chr10	35010000	35020000	chr10	35260000	35270000		chr10	32340000	32350000	chr10	32620000	32630000		chr10	76180000	76190000	chr10	76620000	76630000		chr10	90310000	90320000	chr10	90560000	90570000
	chr10	24470000	24480000	chr10	24800000	24810000		chr10	6490000	6500000	chr10	6960000	6970000		chr10	56170000	56180000	chr10	57010000	57020000		chr10	22610000	22620000	chr10	22850000	22860000		chr10	32310000	32320000	chr10	32490000	32500000		chr10	35750000	35760000	chr10	35830000	35840000		chr10	33290000	33300000	chr10	33440000	33450000
	chr10	24510000	24520000	chr10	24810000	24820000		chr10	6480000	6490000	chr10	7030000	7040000		chr10	56210000	56220000	chr10	57050000	57060000		chr10	22620000	22630000	chr10	22720000	22730000		chr10	32730000	32740000	chr10	33440000	33450000		chr10	870000	880000	chr10	970000	980000		chr10	12820000	12830000	chr10	13110000	13120000
	chr10	24490000	24500000	chr10	24630000	24640000		chr10	6470000	6480000	chr10	7010000	7020000		chr10	56190000	56200000	chr10	56730000	56740000		chr10	22600000	22610000	chr10	23270000	23280000		chr10	32750000	32760000	chr10	33160000	33170000		chr10	26740000	26750000	chr10	26830000	26840000		chr10	12820000	12830000	chr10	12940000	12950000
	chr10	24560000	24570000	chr10	24640000	24650000		chr10	6460000	6470000	chr10	6700000	6710000		chr10	81130000	81140000	chr10	82000000	82010000		chr10	80110000	80120000	chr10	80410000	80420000		chr10	32730000	32740000	chr10	33290000	33300000		chr10	16980000	16990000	chr10	17270000	17280000		chr10	77790000	77800000	chr10	78740000	78750000
	chr10	24490000	24500000	chr10	24590000	24600000		chr10	81900000	81910000	chr10	81980000	81990000		chr10	81130000	81140000	chr10	81710000	81720000		chr10	80080000	80090000	chr10	80950000	80960000		chr10	115150000	115160000	chr10	115270000	115280000		chr10	123920000	123930000	chr10	124000000	124010000		chr10	77790000	77800000	chr10	78300000	78310000
	chr10	23460000	23470000	chr10	23580000	23590000		chr10	81800000	81810000	chr10	82000000	82010000		chr10	81130000	81140000	chr10	81260000	81270000		chr10	114210000	114220000	chr10	114870000	114880000		chr10	96380000	96390000	chr10	97120000	97130000		chr10	8160000	8170000	chr10	8250000	8260000		chr10	77860000	77870000	chr10	78300000	78310000
	chr10	23450000	23460000	chr10	23990000	24000000		chr10	81810000	81820000	chr10	81890000	81900000		chr10	81130000	81140000	chr10	81360000	81370000		chr10	114220000	114230000	chr10	114570000	114580000		chr10	74010000	74020000	chr10	74090000	74100000		chr10	114320000	114330000	chr10	114890000	114900000		chr10	77800000	77810000	chr10	78060000	78070000
	chr10	23490000	23500000	chr10	23830000	23840000		chr10	81890000	81900000	chr10	82110000	82120000		chr10	10110000	10120000	chr10	10910000	10920000		chr10	114250000	114260000	chr10	115140000	115150000		chr10	29460000	29470000	chr10	29570000	29580000		chr10	44200000	44210000	chr10	44550000	44560000		chr10	77840000	77850000	chr10	78060000	78070000
	chr10	33490000	33500000	chr10	33620000	33630000		chr10	94050000	94060000	chr10	94180000	94190000		chr10	10100000	10110000	chr10	10680000	10690000		chr10	8650000	8660000	chr10	8890000	8900000		chr10	28540000	28550000	chr10	28660000	28670000		chr10	23880000	23890000	chr10	23970000	23980000		chr10	92850000	92860000	chr10	92990000	93000000
	chr10	33460000	33470000	chr10	33920000	33930000		chr10	80300000	80310000	chr10	80590000	80600000		chr10	97980000	97990000	chr10	98060000	98070000		chr10	8680000	8690000	chr10	8900000	8910000		chr10	102670000	102680000	chr10	102770000	102780000		chr10	28810000	28820000	chr10	28890000	28900000		chr10	24280000	24290000	chr10	24810000	24820000
	chr10	14620000	14630000	chr10	14860000	14870000		chr10	80270000	80280000	chr10	80950000	80960000		chr10	31320000	31330000	chr10	32040000	32050000		chr10	8680000	8690000	chr10	9240000	9250000		chr10	54710000	54720000	chr10	55350000	55360000		chr10	108960000	108970000	chr10	109050000	109060000		chr10	24280000	24290000	chr10	24650000	24660000
	chr10	14550000	14560000	chr10	15000000	15010000		chr10	60180000	60190000	chr10	60370000	60380000		chr10	31320000	31330000	chr10	31600000	31610000		chr10	30290000	30300000	chr10	30520000	30530000		chr10	29170000	29180000	chr10	29400000	29410000		chr10	80720000	80730000	chr10	80950000	80960000		chr10	24280000	24290000	chr10	24480000	24490000
	chr10	14560000	14570000	chr10	15140000	15150000		chr10	60170000	60180000	chr10	60290000	60300000		chr10	54970000	54980000	chr10	55060000	55070000		chr10	30290000	30300000	chr10	30640000	30650000		chr10	29120000	29130000	chr10	29410000	29420000		chr10	76540000	76550000	chr10	76780000	76790000		chr10	24480000	24490000	chr10	24800000	24810000
	chr10	93400000	93410000	chr10	93480000	93490000		chr10	60170000	60180000	chr10	60470000	60480000		chr10	54960000	54970000	chr10	56160000	56170000		chr10	30290000	30300000	chr10	30870000	30880000		chr10	29160000	29170000	chr10	29570000	29580000		chr10	119300000	119310000	chr10	119460000	119470000		chr10	24480000	24490000	chr10	24650000	24660000
	chr10	93400000	93410000	chr10	93650000	93660000		chr10	97670000	97680000	chr10	97750000	97760000		chr10	54970000	54980000	chr10	55350000	55360000		chr10	12310000	12320000	chr10	12560000	12570000		chr10	115930000	115940000	chr10	116200000	116210000		chr10	1180000	1190000	chr10	1400000	1410000		chr10	120790000	120800000	chr10	121340000	121350000
	chr10	1150000	1160000	chr10	1430000	1440000		chr10	97660000	97670000	chr10	97960000	97970000		chr10	54960000	54970000	chr10	55750000	55760000		chr10	12300000	12310000	chr10	13110000	13120000		chr10	30020000	30030000	chr10	30140000	30150000		chr10	7560000	7570000	chr10	7910000	7920000		chr10	126740000	126750000	chr10	126840000	126850000
	chr10	68320000	68330000	chr10	68680000	68690000		chr10	97660000	97670000	chr10	97930000	97940000		chr10	54960000	54970000	chr10	55600000	55610000		chr10	12300000	12310000	chr10	12750000	12760000		chr10	8100000	8110000	chr10	8740000	8750000		chr10	30190000	30200000	chr10	30280000	30290000		chr10	126770000	126780000	chr10	127400000	127410000
	chr10	126730000	126740000	chr10	127020000	127030000		chr10	18810000	18820000	chr10	18940000	18950000		chr10	59340000	59350000	chr10	59820000	59830000		chr10	22730000	22740000	chr10	23290000	23300000		chr10	8100000	8110000	chr10	9270000	9280000		chr10	16480000	16490000	chr10	16570000	16580000		chr10	71550000	71560000	chr10	71670000	71680000
	chr10	114970000	114980000	chr10	115150000	115160000		chr10	133640000	133650000	chr10	133930000	133940000		chr10	59340000	59350000	chr10	59910000	59920000		chr10	102320000	102330000	chr10	102490000	102500000		chr10	8090000	8100000	chr10	8910000	8920000		chr10	95390000	95400000	chr10	95580000	95590000		chr10	16870000	16880000	chr10	17470000	17480000
	chr10	114970000	114980000	chr10	115280000	115290000		chr10	113750000	113760000	chr10	114040000	114050000		chr10	59340000	59350000	chr10	59600000	59610000		chr10	102320000	102330000	chr10	102750000	102760000		chr10	8120000	8130000	chr10	8470000	8480000		chr10	35980000	35990000	chr10	36070000	36080000		chr10	16880000	16890000	chr10	17290000	17300000
	chr10	114910000	114920000	chr10	115300000	115310000		chr10	13160000	13170000	chr10	13360000	13370000		chr10	110310000	110320000	chr10	110530000	110540000		chr10	102320000	102330000	chr10	102620000	102630000		chr10	8120000	8130000	chr10	8370000	8380000		chr10	35290000	35300000	chr10	35370000	35380000		chr10	98400000	98410000	chr10	98500000	98510000
	chr10	30720000	30730000	chr10	30810000	30820000		chr10	13180000	13190000	chr10	13560000	13570000		chr10	110310000	110320000	chr10	110730000	110740000		chr10	87770000	87780000	chr10	88130000	88140000		chr10	28720000	28730000	chr10	29590000	29600000		chr10	76070000	76080000	chr10	76320000	76330000		chr10	98400000	98410000	chr10	98800000	98810000
	chr10	30680000	30690000	chr10	30930000	30940000		chr10	68390000	68400000	chr10	68670000	68680000		chr10	120490000	120500000	chr10	120790000	120800000		chr10	105000000	105010000	chr10	105090000	105100000		chr10	28710000	28720000	chr10	28850000	28860000		chr10	122710000	122720000	chr10	123120000	123130000		chr10	98400000	98410000	chr10	98580000	98590000
	chr10	96940000	96950000	chr10	97370000	97380000		chr10	68370000	68380000	chr10	68600000	68610000		chr10	120470000	120480000	chr10	120890000	120900000		chr10	33080000	33090000	chr10	33300000	33310000		chr10	50610000	50620000	chr10	50710000	50720000		chr10	60280000	60290000	chr10	60460000	60470000		chr10	92500000	92510000	chr10	92620000	92630000
	chr10	96950000	96960000	chr10	97120000	97130000		chr10	100070000	100080000	chr10	100170000	100180000		chr10	114080000	114090000	chr10	114190000	114200000		chr10	33080000	33090000	chr10	33400000	33410000		chr10	2960000	2970000	chr10	3080000	3090000		chr10	64200000	64210000	chr10	64280000	64290000		chr10	4310000	4320000	chr10	4680000	4690000
	chr10	77030000	77040000	chr10	77680000	77690000		chr10	9440000	9450000	chr10	10700000	10710000		chr10	55750000	55760000	chr10	56160000	56170000		chr10	49760000	49770000	chr10	49860000	49870000		chr10	127550000	127560000	chr10	128190000	128200000		chr10	14430000	14440000	chr10	14510000	14520000		chr10	4280000	4290000	chr10	4690000	4700000
	chr10	77040000	77050000	chr10	77130000	77140000		chr10	9390000	9400000	chr10	10710000	10720000		chr10	69070000	69080000	chr10	69530000	69540000		chr10	62430000	62440000	chr10	62520000	62530000		chr10	127550000	127560000	chr10	128060000	128070000		chr10	15320000	15330000	chr10	15400000	15410000		chr10	4310000	4320000	chr10	4390000	4400000
	chr10	77060000	77070000	chr10	77490000	77500000		chr10	9370000	9380000	chr10	11310000	11320000		chr10	69060000	69070000	chr10	69290000	69300000		chr10	21450000	21460000	chr10	21770000	21780000		chr10	134180000	134190000	chr10	134260000	134270000		chr10	76050000	76060000	chr10	76440000	76450000		chr10	4280000	4290000	chr10	4800000	4810000
	chr10	132370000	132380000	chr10	132460000	132470000		chr10	9430000	9440000	chr10	11300000	11310000		chr10	74000000	74010000	chr10	74090000	74100000		chr10	21460000	21470000	chr10	21550000	21560000		chr10	134200000	134210000	chr10	134340000	134350000		chr10	13410000	13420000	chr10	13490000	13500000		chr10	112060000	112070000	chr10	112640000	112650000
	chr10	73880000	73890000	chr10	73980000	73990000		chr10	9370000	9380000	chr10	11070000	11080000		chr10	42830000	42840000	chr10	43200000	43210000		chr10	24170000	24180000	chr10	24850000	24860000		chr10	134200000	134210000	chr10	134440000	134450000		chr10	11470000	11480000	chr10	11550000	11560000		chr10	112070000	112080000	chr10	112300000	112310000
	chr10	73810000	73820000	chr10	73970000	73980000		chr10	9430000	9440000	chr10	11090000	11100000		chr10	73880000	73890000	chr10	74090000	74100000		chr10	79490000	79500000	chr10	79780000	79790000		chr10	48460000	48470000	chr10	48640000	48650000		chr10	94330000	94340000	chr10	94630000	94640000		chr10	81830000	81840000	chr10	81970000	81980000
	chr10	73880000	73890000	chr10	74090000	74100000		chr10	9370000	9380000	chr10	11510000	11520000		chr10	73810000	73820000	chr10	73900000	73910000		chr10	121360000	121370000	chr10	121490000	121500000		chr10	64980000	64990000	chr10	65280000	65290000		chr10	79800000	79810000	chr10	80440000	80450000		chr10	81810000	81820000	chr10	81900000	81910000
	chr10	69110000	69120000	chr10	69260000	69270000		chr10	114970000	114980000	chr10	115140000	115150000		chr10	73880000	73890000	chr10	73980000	73990000		chr10	121360000	121370000	chr10	121610000	121620000		chr10	64970000	64980000	chr10	65130000	65140000		chr10	104720000	104730000	chr10	105000000	105010000		chr10	45420000	45430000	chr10	45720000	45730000
	chr10	90240000	90250000	chr10	90570000	90580000		chr10	114970000	114980000	chr10	115220000	115230000		chr10	73800000	73810000	chr10	73980000	73990000		chr10	104150000	104160000	chr10	104340000	104350000		chr10	65020000	65030000	chr10	65470000	65480000		chr10	101600000	101610000	chr10	101920000	101930000		chr10	101190000	101200000	chr10	101360000	101370000
	chr10	90220000	90230000	chr10	90300000	90310000		chr10	114940000	114950000	chr10	115260000	115270000		chr10	87750000	87760000	chr10	88130000	88140000		chr10	104150000	104160000	chr10	104230000	104240000		chr10	64980000	64990000	chr10	65470000	65480000		chr10	13250000	13260000	chr10	13330000	13340000		chr10	101190000	101200000	chr10	101460000	101470000
	chr10	43650000	43660000	chr10	43840000	43850000		chr10	115000000	115010000	chr10	115210000	115220000		chr10	87760000	87770000	chr10	88360000	88370000		chr10	74120000	74130000	chr10	74440000	74450000		chr10	64950000	64960000	chr10	65370000	65380000		chr10	99770000	99780000	chr10	99860000	99870000		chr10	101210000	101220000	chr10	101300000	101310000
	chr10	43660000	43670000	chr10	43950000	43960000		chr10	115000000	115010000	chr10	115320000	115330000		chr10	63260000	63270000	chr10	63480000	63490000		chr10	74130000	74140000	chr10	74400000	74410000		chr10	65020000	65030000	chr10	65390000	65400000		chr10	16910000	16920000	chr10	16990000	17000000		chr10	64030000	64040000	chr10	64140000	64150000
	chr10	75010000	75020000	chr10	75260000	75270000		chr10	114890000	114900000	chr10	115270000	115280000		chr10	71720000	71730000	chr10	72140000	72150000		chr10	74120000	74130000	chr10	74590000	74600000		chr10	64950000	64960000	chr10	65210000	65220000		chr10	35530000	35540000	chr10	35880000	35890000		chr10	25400000	25410000	chr10	25960000	25970000
	chr10	75020000	75030000	chr10	75400000	75410000		chr10	114920000	114930000	chr10	115320000	115330000		chr10	71720000	71730000	chr10	71820000	71830000		chr10	74140000	74150000	chr10	74310000	74320000		chr10	5920000	5930000	chr10	6130000	6140000		chr10	11160000	11170000	chr10	11290000	11300000		chr10	29430000	29440000	chr10	29580000	29590000
	chr10	75010000	75020000	chr10	75120000	75130000		chr10	82130000	82140000	chr10	82680000	82690000		chr10	71740000	71750000	chr10	71940000	71950000		chr10	74120000	74130000	chr10	74810000	74820000		chr10	99930000	99940000	chr10	100060000	100070000		chr10	36850000	36860000	chr10	36930000	36940000		chr10	50180000	50190000	chr10	50370000	50380000
	chr10	112070000	112080000	chr10	112400000	112410000		chr10	82200000	82210000	chr10	82280000	82290000		chr10	128810000	128820000	chr10	128980000	128990000		chr10	74120000	74130000	chr10	74910000	74920000		chr10	82110000	82120000	chr10	82690000	82700000		chr10	111640000	111650000	chr10	111890000	111900000		chr10	50180000	50190000	chr10	50610000	50620000
	chr10	112060000	112070000	chr10	112360000	112370000		chr10	82200000	82210000	chr10	82350000	82360000		chr10	128780000	128790000	chr10	129370000	129380000		chr10	127690000	127700000	chr10	127960000	127970000		chr10	82200000	82210000	chr10	82690000	82700000		chr10	76050000	76060000	chr10	76350000	76360000		chr10	50180000	50190000	chr10	50710000	50720000
	chr10	112080000	112090000	chr10	112160000	112170000		chr10	82120000	82130000	chr10	82440000	82450000		chr10	3670000	3680000	chr10	4850000	4860000		chr10	127660000	127670000	chr10	128190000	128200000		chr10	82200000	82210000	chr10	82340000	82350000		chr10	18800000	18810000	chr10	18950000	18960000		chr10	31820000	31830000	chr10	32080000	32090000
	chr10	112100000	112110000	chr10	112250000	112260000		chr10	82200000	82210000	chr10	82440000	82450000		chr10	3700000	3710000	chr10	3780000	3790000		chr10	5940000	5950000	chr10	6110000	6120000		chr10	82200000	82210000	chr10	82290000	82300000		chr10	1010000	1020000	chr10	1090000	1100000		chr10	31310000	31320000	chr10	32080000	32090000
	chr10	112060000	112070000	chr10	112670000	112680000		chr10	6150000	6160000	chr10	6240000	6250000		chr10	60090000	60100000	chr10	60420000	60430000		chr10	34940000	34950000	chr10	35260000	35270000		chr10	82140000	82150000	chr10	82440000	82450000		chr10	38040000	38050000	chr10	38130000	38140000		chr10	31320000	31330000	chr10	31600000	31610000
	chr10	112040000	112050000	chr10	112600000	112610000		chr10	6240000	6250000	chr10	6440000	6450000		chr10	60060000	60070000	chr10	60140000	60150000		chr10	34970000	34980000	chr10	35100000	35110000		chr10	82200000	82210000	chr10	82420000	82430000		chr10	91120000	91130000	chr10	91310000	91320000		chr10	31380000	31390000	chr10	31600000	31610000
	chr10	112070000	112080000	chr10	112500000	112510000		chr10	6160000	6170000	chr10	6670000	6680000		chr10	60060000	60070000	chr10	60270000	60280000		chr10	34970000	34980000	chr10	35180000	35190000		chr10	124800000	124810000	chr10	125310000	125320000		chr10	38060000	38070000	chr10	38140000	38150000		chr10	118440000	118450000	chr10	118540000	118550000
	chr10	114480000	114490000	chr10	114570000	114580000		chr10	32540000	32550000	chr10	32630000	32640000		chr10	133840000	133850000	chr10	133950000	133960000		chr10	34940000	34950000	chr10	35470000	35480000		chr10	124890000	124900000	chr10	125130000	125140000		chr10	80160000	80170000	chr10	80410000	80420000		chr10	118440000	118450000	chr10	118930000	118940000
	chr10	114580000	114590000	chr10	114710000	114720000		chr10	97000000	97010000	chr10	97120000	97130000		chr10	133770000	133780000	chr10	134240000	134250000		chr10	34940000	34950000	chr10	35360000	35370000		chr10	124800000	124810000	chr10	125130000	125140000		chr10	55590000	55600000	chr10	55680000	55690000		chr10	18250000	18260000	chr10	18500000	18510000
	chr10	114450000	114460000	chr10	115280000	115290000		chr10	96890000	96900000	chr10	97120000	97130000		chr10	49650000	49660000	chr10	49860000	49870000		chr10	82010000	82020000	chr10	82280000	82290000		chr10	124800000	124810000	chr10	124880000	124890000		chr10	14770000	14780000	chr10	14850000	14860000		chr10	118550000	118560000	chr10	118840000	118850000
	chr10	114450000	114460000	chr10	114880000	114890000		chr10	96950000	96960000	chr10	97180000	97190000		chr10	62090000	62100000	chr10	62400000	62410000		chr10	92510000	92520000	chr10	92610000	92620000		chr10	124810000	124820000	chr10	125730000	125740000		chr10	101590000	101600000	chr10	101990000	102000000		chr10	118550000	118560000	chr10	118930000	118940000
	chr10	114520000	114530000	chr10	114880000	114890000		chr10	96950000	96960000	chr10	97360000	97370000		chr10	62090000	62100000	chr10	62190000	62200000		chr10	70990000	71000000	chr10	71150000	71160000		chr10	90590000	90600000	chr10	90680000	90690000		chr10	13140000	13150000	chr10	13340000	13350000		chr10	62570000	62580000	chr10	63590000	63600000
	chr10	67970000	67980000	chr10	68680000	68690000		chr10	69690000	69700000	chr10	69810000	69820000		chr10	62090000	62100000	chr10	62520000	62530000		chr10	70990000	71000000	chr10	71400000	71410000		chr10	90590000	90600000	chr10	90740000	90750000		chr10	31430000	31440000	chr10	31590000	31600000		chr10	62570000	62580000	chr10	63030000	63040000
	chr10	67950000	67960000	chr10	68370000	68380000		chr10	69560000	69570000	chr10	69820000	69830000		chr10	16590000	16600000	chr10	16810000	16820000		chr10	70980000	70990000	chr10	71280000	71290000		chr10	90600000	90610000	chr10	90970000	90980000		chr10	30960000	30970000	chr10	31040000	31050000		chr10	62570000	62580000	chr10	62720000	62730000
	chr10	11470000	11480000	chr10	11800000	11810000		chr10	69620000	69630000	chr10	69960000	69970000		chr10	75010000	75020000	chr10	75250000	75260000		chr10	134300000	134310000	chr10	134940000	134950000		chr10	60710000	60720000	chr10	60930000	60940000		chr10	114230000	114240000	chr10	115140000	115150000		chr10	62570000	62580000	chr10	63490000	63500000
	chr10	122000000	122010000	chr10	122080000	122090000		chr10	69670000	69680000	chr10	69940000	69950000		chr10	75020000	75030000	chr10	75110000	75120000		chr10	134270000	134280000	chr10	134450000	134460000		chr10	60710000	60720000	chr10	61550000	61560000		chr10	28970000	28980000	chr10	29050000	29060000		chr10	101380000	101390000	chr10	101470000	101480000
	chr10	8450000	8460000	chr10	8900000	8910000		chr10	69540000	69550000	chr10	69960000	69970000		chr10	75010000	75020000	chr10	75490000	75500000		chr10	74390000	74400000	chr10	74590000	74600000		chr10	60700000	60710000	chr10	61340000	61350000		chr10	114470000	114480000	chr10	114700000	114710000		chr10	12390000	12400000	chr10	12750000	12760000
	chr10	8420000	8430000	chr10	8730000	8740000		chr10	69610000	69620000	chr10	70060000	70070000		chr10	75020000	75030000	chr10	75400000	75410000		chr10	13140000	13150000	chr10	13340000	13350000		chr10	59350000	59360000	chr10	59610000	59620000		chr10	5140000	5150000	chr10	5410000	5420000		chr10	12390000	12400000	chr10	12670000	12680000
	chr10	8440000	8450000	chr10	9330000	9340000		chr10	76170000	76180000	chr10	76840000	76850000		chr10	96350000	96360000	chr10	97390000	97400000		chr10	104850000	104860000	chr10	105000000	105010000		chr10	59340000	59350000	chr10	59820000	59830000		chr10	118820000	118830000	chr10	118900000	118910000		chr10	12390000	12400000	chr10	12470000	12480000
	chr10	87320000	87330000	chr10	88100000	88110000		chr10	76180000	76190000	chr10	76770000	76780000		chr10	96410000	96420000	chr10	96710000	96720000		chr10	104850000	104860000	chr10	105080000	105090000		chr10	59330000	59340000	chr10	59910000	59920000		chr10	94260000	94270000	chr10	94340000	94350000		chr10	12380000	12390000	chr10	12530000	12540000
	chr10	87290000	87300000	chr10	87870000	87880000		chr10	85920000	85930000	chr10	86300000	86310000		chr10	96380000	96390000	chr10	96930000	96940000		chr10	99670000	99680000	chr10	99780000	99790000		chr10	75640000	75650000	chr10	75840000	75850000		chr10	23100000	23110000	chr10	23270000	23280000		chr10	5150000	5160000	chr10	5420000	5430000
	chr10	87320000	87330000	chr10	87870000	87880000		chr10	85910000	85920000	chr10	86100000	86110000		chr10	96380000	96390000	chr10	97120000	97130000		chr10	12830000	12840000	chr10	13100000	13110000		chr10	75600000	75610000	chr10	75700000	75710000		chr10	67340000	67350000	chr10	67420000	67430000		chr10	105720000	105730000	chr10	105880000	105890000
	chr10	6240000	6250000	chr10	6440000	6450000		chr10	85880000	85890000	chr10	85960000	85970000		chr10	96390000	96400000	chr10	96630000	96640000		chr10	94740000	94750000	chr10	95260000	95270000		chr10	75640000	75650000	chr10	75990000	76000000		chr10	62910000	62920000	chr10	63220000	63230000		chr10	101610000	101620000	chr10	101960000	101970000
	chr10	6270000	6280000	chr10	6700000	6710000		chr10	114330000	114340000	chr10	114570000	114580000		chr10	123900000	123910000	chr10	124010000	124020000		chr10	101320000	101330000	chr10	101450000	101460000		chr10	75700000	75710000	chr10	75980000	75990000		chr10	68880000	68890000	chr10	69060000	69070000		chr10	101600000	101610000	chr10	101800000	101810000
	chr10	6240000	6250000	chr10	6630000	6640000		chr10	114310000	114320000	chr10	114960000	114970000		chr10	123930000	123940000	chr10	124320000	124330000		chr10	69610000	69620000	chr10	69840000	69850000		chr10	90690000	90700000	chr10	90780000	90790000		chr10	22820000	22830000	chr10	23270000	23280000		chr10	31620000	31630000	chr10	31770000	31780000
	chr10	17030000	17040000	chr10	17270000	17280000		chr10	114320000	114330000	chr10	115140000	115150000		chr10	123900000	123910000	chr10	124460000	124470000		chr10	69610000	69620000	chr10	69970000	69980000		chr10	90790000	90800000	chr10	90970000	90980000		chr10	31000000	31010000	chr10	32090000	32100000		chr10	31630000	31640000	chr10	32080000	32090000
	chr10	63670000	63680000	chr10	63770000	63780000		chr10	114330000	114340000	chr10	114710000	114720000		chr10	123900000	123910000	chr10	124190000	124200000		chr10	69610000	69620000	chr10	69930000	69940000		chr10	21150000	21160000	chr10	21330000	21340000		chr10	71410000	71420000	chr10	71670000	71680000		chr10	31600000	31610000	chr10	32060000	32070000
	chr10	63670000	63680000	chr10	63980000	63990000		chr10	114320000	114330000	chr10	114880000	114890000		chr10	70230000	70240000	chr10	70670000	70680000		chr10	69610000	69620000	chr10	70050000	70060000		chr10	21150000	21160000	chr10	21550000	21560000		chr10	16880000	16890000	chr10	17640000	17650000		chr10	31610000	31620000	chr10	31980000	31990000
	chr10	4300000	4310000	chr10	4800000	4810000		chr10	114320000	114330000	chr10	114420000	114430000		chr10	70230000	70240000	chr10	70480000	70490000		chr10	69610000	69620000	chr10	70110000	70120000		chr10	21140000	21150000	chr10	22240000	22250000		chr10	11010000	11020000	chr10	11100000	11110000		chr10	116390000	116400000	chr10	116540000	116550000
	chr10	4300000	4310000	chr10	4500000	4510000		chr10	58230000	58240000	chr10	58570000	58580000		chr10	70270000	70280000	chr10	70480000	70490000		chr10	90780000	90790000	chr10	90970000	90980000		chr10	96030000	96040000	chr10	96190000	96200000		chr10	78310000	78320000	chr10	78740000	78750000		chr10	116380000	116390000	chr10	116460000	116470000
	chr10	133460000	133470000	chr10	133650000	133660000		chr10	23820000	23830000	chr10	23940000	23950000		chr10	112690000	112700000	chr10	112770000	112780000		chr10	69840000	69850000	chr10	69960000	69970000		chr10	104670000	104680000	chr10	104820000	104830000		chr10	94640000	94650000	chr10	95030000	95040000		chr10	34600000	34610000	chr10	34910000	34920000
	chr10	76010000	76020000	chr10	76860000	76870000		chr10	23820000	23830000	chr10	24840000	24850000		chr10	125070000	125080000	chr10	125300000	125310000		chr10	69840000	69850000	chr10	70060000	70070000		chr10	104670000	104680000	chr10	104950000	104960000		chr10	12310000	12320000	chr10	12580000	12590000		chr10	114480000	114490000	chr10	114880000	114890000
	chr10	76010000	76020000	chr10	76780000	76790000		chr10	23840000	23850000	chr10	24430000	24440000		chr10	22620000	22630000	chr10	22970000	22980000		chr10	124800000	124810000	chr10	125320000	125330000		chr10	104590000	104600000	chr10	105230000	105240000		chr10	93760000	93770000	chr10	94190000	94200000		chr10	114480000	114490000	chr10	115140000	115150000
	chr10	76020000	76030000	chr10	76380000	76390000		chr10	23840000	23850000	chr10	24110000	24120000		chr10	22620000	22630000	chr10	22820000	22830000		chr10	124790000	124800000	chr10	125140000	125150000		chr10	104590000	104600000	chr10	105090000	105100000		chr10	75490000	75500000	chr10	75570000	75580000		chr10	6880000	6890000	chr10	7450000	7460000
	chr10	76030000	76040000	chr10	76980000	76990000		chr10	63240000	63250000	chr10	63580000	63590000		chr10	22620000	22630000	chr10	22890000	22900000		chr10	103450000	103460000	chr10	103530000	103540000		chr10	104670000	104680000	chr10	105090000	105100000		chr10	29800000	29810000	chr10	29880000	29890000		chr10	73710000	73720000	chr10	73970000	73980000
	chr10	76000000	76010000	chr10	76470000	76480000		chr10	63240000	63250000	chr10	63350000	63360000		chr10	22610000	22620000	chr10	22720000	22730000		chr10	106030000	106040000	chr10	106110000	106120000		chr10	104590000	104600000	chr10	104670000	104680000		chr10	21790000	21800000	chr10	21950000	21960000		chr10	73650000	73660000	chr10	73980000	73990000
	chr10	76020000	76030000	chr10	76590000	76600000		chr10	63300000	63310000	chr10	63470000	63480000		chr10	22610000	22620000	chr10	23270000	23280000		chr10	103660000	103670000	chr10	103760000	103770000		chr10	104670000	104680000	chr10	105000000	105010000		chr10	74120000	74130000	chr10	74830000	74840000		chr10	73710000	73720000	chr10	74100000	74110000
	chr10	108150000	108160000	chr10	108340000	108350000		chr10	112160000	112170000	chr10	112250000	112260000		chr10	22620000	22630000	chr10	23350000	23360000		chr10	79600000	79610000	chr10	79680000	79690000		chr10	104590000	104600000	chr10	105000000	105010000		chr10	31760000	31770000	chr10	32080000	32090000		chr10	73710000	73720000	chr10	73800000	73810000
	chr10	43160000	43170000	chr10	43610000	43620000		chr10	112160000	112170000	chr10	112300000	112310000		chr10	128260000	128270000	chr10	128430000	128440000		chr10	102970000	102980000	chr10	103050000	103060000		chr10	104740000	104750000	chr10	105000000	105010000		chr10	120330000	120340000	chr10	120590000	120600000		chr10	88440000	88450000	chr10	88900000	88910000
	chr10	43190000	43200000	chr10	43270000	43280000		chr10	129510000	129520000	chr10	129860000	129870000		chr10	98840000	98850000	chr10	99090000	99100000		chr10	90870000	90880000	chr10	90970000	90980000		chr10	13820000	13830000	chr10	14860000	14870000		chr10	33800000	33810000	chr10	33940000	33950000		chr10	88460000	88470000	chr10	88650000	88660000
	chr10	29160000	29170000	chr10	29680000	29690000		chr10	129510000	129520000	chr10	129640000	129650000		chr10	98790000	98800000	chr10	98870000	98880000		chr10	33210000	33220000	chr10	33290000	33300000		chr10	13830000	13840000	chr10	14130000	14140000		chr10	15480000	15490000	chr10	15870000	15880000		chr10	21780000	21790000	chr10	22540000	22550000
	chr10	29160000	29170000	chr10	29410000	29420000		chr10	71400000	71410000	chr10	71670000	71680000		chr10	98830000	98840000	chr10	98960000	98970000		chr10	99030000	99040000	chr10	99110000	99120000		chr10	13840000	13850000	chr10	14520000	14530000		chr10	21570000	21580000	chr10	21650000	21660000		chr10	21820000	21830000	chr10	22240000	22250000
	chr10	29160000	29170000	chr10	29590000	29600000		chr10	71400000	71410000	chr10	71550000	71560000		chr10	2970000	2980000	chr10	3080000	3090000		chr10	106190000	106200000	chr10	106300000	106310000		chr10	81340000	81350000	chr10	81680000	81690000		chr10	6710000	6720000	chr10	7460000	7470000		chr10	21760000	21770000	chr10	22230000	22240000
	chr10	59090000	59100000	chr10	59610000	59620000		chr10	95820000	95830000	chr10	96070000	96080000		chr10	2970000	2980000	chr10	3180000	3190000		chr10	48580000	48590000	chr10	48660000	48670000		chr10	81290000	81300000	chr10	81890000	81900000		chr10	12230000	12240000	chr10	12750000	12760000		chr10	21780000	21790000	chr10	22010000	22020000
	chr10	59100000	59110000	chr10	59330000	59340000		chr10	95850000	95860000	chr10	95980000	95990000		chr10	12760000	12770000	chr10	12940000	12950000		chr10	92680000	92690000	chr10	92780000	92790000		chr10	81300000	81310000	chr10	81800000	81810000		chr10	6960000	6970000	chr10	7190000	7200000		chr10	21790000	21800000	chr10	21970000	21980000
	chr10	59110000	59120000	chr10	59400000	59410000		chr10	74380000	74390000	chr10	74580000	74590000		chr10	12760000	12770000	chr10	13110000	13120000		chr10	14640000	14650000	chr10	14820000	14830000		chr10	26000000	26010000	chr10	26840000	26850000		chr10	13120000	13130000	chr10	13200000	13210000		chr10	21810000	21820000	chr10	22620000	22630000
	chr10	59140000	59150000	chr10	59390000	59400000		chr10	74370000	74380000	chr10	74820000	74830000		chr10	12850000	12860000	chr10	13100000	13110000		chr10	27440000	27450000	chr10	27520000	27530000		chr10	26010000	26020000	chr10	26550000	26560000		chr10	14140000	14150000	chr10	14220000	14230000		chr10	38290000	38300000	chr10	38380000	38390000
	chr10	59100000	59110000	chr10	59830000	59840000		chr10	93530000	93540000	chr10	94180000	94190000		chr10	89410000	89420000	chr10	89490000	89500000		chr10	123690000	123700000	chr10	123780000	123790000		chr10	4010000	4020000	chr10	4170000	4180000		chr10	5480000	5490000	chr10	5760000	5770000		chr10	38260000	38270000	chr10	38640000	38650000
	chr10	82190000	82200000	chr10	82270000	82280000		chr10	93510000	93520000	chr10	93660000	93670000		chr10	89400000	89410000	chr10	90300000	90310000		chr10	32540000	32550000	chr10	32630000	32640000		chr10	4000000	4010000	chr10	4100000	4110000		chr10	46990000	47000000	chr10	47070000	47080000		chr10	97780000	97790000	chr10	97960000	97970000
	chr10	82140000	82150000	chr10	82330000	82340000		chr10	113510000	113520000	chr10	113890000	113900000		chr10	63510000	63520000	chr10	64000000	64010000		chr10	111960000	111970000	chr10	112040000	112050000		chr10	4000000	4010000	chr10	4690000	4700000		chr10	30980000	30990000	chr10	31780000	31790000		chr10	97770000	97780000	chr10	98050000	98060000
	chr10	82190000	82200000	chr10	82360000	82370000		chr10	113510000	113520000	chr10	113610000	113620000		chr10	63510000	63520000	chr10	63780000	63790000		chr10	99920000	99930000	chr10	100010000	100020000		chr10	3990000	4000000	chr10	4780000	4790000		chr10	93140000	93150000	chr10	93680000	93690000		chr10	13850000	13860000	chr10	13990000	14000000
	chr10	82120000	82130000	chr10	82410000	82420000		chr10	113510000	113520000	chr10	114080000	114090000		chr10	63490000	63500000	chr10	63710000	63720000		chr10	101610000	101620000	chr10	101700000	101710000		chr10	3990000	4000000	chr10	4390000	4400000		chr10	34530000	34540000	chr10	34920000	34930000		chr10	13830000	13840000	chr10	14510000	14520000
	chr10	71400000	71410000	chr10	71480000	71490000		chr10	123410000	123420000	chr10	123640000	123650000		chr10	63510000	63520000	chr10	63850000	63860000		chr10	125980000	125990000	chr10	126070000	126080000		chr10	128070000	128080000	chr10	128190000	128200000		chr10	27480000	27490000	chr10	27640000	27650000		chr10	13830000	13840000	chr10	14130000	14140000
	chr10	71430000	71440000	chr10	71680000	71690000		chr10	123390000	123400000	chr10	123480000	123490000		chr10	63510000	63520000	chr10	63590000	63600000		chr10	126340000	126350000	chr10	126420000	126430000		chr10	128060000	128070000	chr10	128430000	128440000		chr10	34950000	34960000	chr10	35160000	35170000		chr10	13820000	13830000	chr10	14230000	14240000
	chr10	71410000	71420000	chr10	71560000	71570000		chr10	114570000	114580000	chr10	114710000	114720000		chr10	63510000	63520000	chr10	63650000	63660000		chr10	34960000	34970000	chr10	35050000	35060000		chr10	73070000	73080000	chr10	73800000	73810000		chr10	12770000	12780000	chr10	12960000	12970000		chr10	97450000	97460000	chr10	97600000	97610000
	chr10	13670000	13680000	chr10	14040000	14050000		chr10	114580000	114590000	chr10	114890000	114900000		chr10	75920000	75930000	chr10	76130000	76140000		chr10	21370000	21380000	chr10	21450000	21460000		chr10	73070000	73080000	chr10	73460000	73470000		chr10	123880000	123890000	chr10	124050000	124060000		chr10	79600000	79610000	chr10	79730000	79740000
	chr10	13700000	13710000	chr10	13810000	13820000		chr10	30540000	30550000	chr10	30880000	30890000		chr10	75910000	75920000	chr10	76170000	76180000		chr10	75170000	75180000	chr10	75250000	75260000		chr10	73070000	73080000	chr10	73320000	73330000		chr10	33620000	33630000	chr10	33900000	33910000		chr10	81900000	81910000	chr10	81980000	81990000
	chr10	87900000	87910000	chr10	88130000	88140000		chr10	30550000	30560000	chr10	30660000	30670000		chr10	75870000	75880000	chr10	76970000	76980000		chr10	52170000	52180000	chr10	52260000	52270000		chr10	73080000	73090000	chr10	73560000	73570000		chr10	33240000	33250000	chr10	33430000	33440000		chr10	17650000	17660000	chr10	17740000	17750000
	chr10	6150000	6160000	chr10	6440000	6450000		chr10	3670000	3680000	chr10	3790000	3800000		chr10	75910000	75920000	chr10	75990000	76000000		chr10	101210000	101220000	chr10	101290000	101300000		chr10	73070000	73080000	chr10	73650000	73660000		chr10	28920000	28930000	chr10	29660000	29670000		chr10	14750000	14760000	chr10	14830000	14840000
	chr10	6140000	6150000	chr10	6230000	6240000		chr10	560000	570000	chr10	830000	840000		chr10	75880000	75890000	chr10	76860000	76870000		chr10	98590000	98600000	chr10	98770000	98780000		chr10	35530000	35540000	chr10	35860000	35870000		chr10	460000	470000	chr10	840000	850000		chr10	14700000	14710000	chr10	14780000	14790000
	chr10	99170000	99180000	chr10	99370000	99380000		chr10	550000	560000	chr10	730000	740000		chr10	75900000	75910000	chr10	76790000	76800000		chr10	88160000	88170000	chr10	88240000	88250000		chr10	8630000	8640000	chr10	8900000	8910000		chr10	8430000	8440000	chr10	8730000	8740000		chr10	7580000	7590000	chr10	7660000	7670000
	chr10	119720000	119730000	chr10	120000000	120010000		chr10	43180000	43190000	chr10	43600000	43610000		chr10	123790000	123800000	chr10	124010000	124020000		chr10	74910000	74920000	chr10	74990000	75000000		chr10	8600000	8610000	chr10	8900000	8910000		chr10	26900000	26910000	chr10	26980000	26990000		chr10	90850000	90860000	chr10	90960000	90970000
	chr10	119710000	119720000	chr10	119860000	119870000		chr10	43080000	43090000	chr10	43590000	43600000		chr10	123810000	123820000	chr10	124190000	124200000		chr10	116360000	116370000	chr10	116460000	116470000		chr10	123500000	123510000	chr10	123640000	123650000		chr10	30290000	30300000	chr10	30590000	30600000		chr10	62630000	62640000	chr10	62710000	62720000
	chr10	90460000	90470000	chr10	90550000	90560000		chr10	43120000	43130000	chr10	43600000	43610000		chr10	123810000	123820000	chr10	123900000	123910000		chr10	71060000	71070000	chr10	71140000	71150000		chr10	93150000	93160000	chr10	93310000	93320000		chr10	15490000	15500000	chr10	15570000	15580000		chr10	111960000	111970000	chr10	112040000	112050000
	chr10	125140000	125150000	chr10	125310000	125320000		chr10	43190000	43200000	chr10	43270000	43280000		chr10	127690000	127700000	chr10	127780000	127790000		chr10	74840000	74850000	chr10	74930000	74940000		chr10	93140000	93150000	chr10	93500000	93510000		chr10	92380000	92390000	chr10	92460000	92470000		chr10	102820000	102830000	chr10	102900000	102910000
	chr10	49570000	49580000	chr10	49710000	49720000		chr10	43130000	43140000	chr10	43260000	43270000		chr10	127620000	127630000	chr10	127790000	127800000		chr10	61680000	61690000	chr10	61790000	61800000		chr10	93150000	93160000	chr10	93670000	93680000		chr10	45750000	45760000	chr10	46070000	46080000		chr10	88800000	88810000	chr10	88900000	88910000
	chr10	49620000	49630000	chr10	49710000	49720000		chr10	120220000	120230000	chr10	120300000	120310000		chr10	127620000	127630000	chr10	128430000	128440000		chr10	120700000	120710000	chr10	120780000	120790000		chr10	93150000	93160000	chr10	93400000	93410000		chr10	29670000	29680000	chr10	29880000	29890000		chr10	27510000	27520000	chr10	27640000	27650000
	chr10	49540000	49550000	chr10	49850000	49860000		chr10	105650000	105660000	chr10	105960000	105970000		chr10	127670000	127680000	chr10	128070000	128080000		chr10	89620000	89630000	chr10	89700000	89710000		chr10	112800000	112810000	chr10	113180000	113190000		chr10	6480000	6490000	chr10	6560000	6570000		chr10	75750000	75760000	chr10	75840000	75850000
	chr10	49630000	49640000	chr10	49830000	49840000		chr10	105640000	105650000	chr10	105880000	105890000		chr10	127670000	127680000	chr10	128190000	128200000		chr10	26890000	26900000	chr10	26970000	26980000		chr10	27650000	27660000	chr10	28670000	28680000		chr10	30810000	30820000	chr10	30890000	30900000		chr10	103680000	103690000	chr10	103770000	103780000
	chr10	31790000	31800000	chr10	32050000	32060000		chr10	105650000	105660000	chr10	105740000	105750000		chr10	127680000	127690000	chr10	128290000	128300000		chr10	121340000	121350000	chr10	121430000	121440000		chr10	27730000	27740000	chr10	28680000	28690000		chr10	28170000	28180000	chr10	28380000	28390000		chr10	98590000	98600000	chr10	98670000	98680000
	chr10	92520000	92530000	chr10	92970000	92980000		chr10	105650000	105660000	chr10	106090000	106100000		chr10	127630000	127640000	chr10	128520000	128530000		chr10	26630000	26640000	chr10	26750000	26760000		chr10	27740000	27750000	chr10	27820000	27830000		chr10	4550000	4560000	chr10	4800000	4810000		chr10	104730000	104740000	chr10	104810000	104820000
	chr10	92530000	92540000	chr10	92610000	92620000		chr10	57430000	57440000	chr10	57880000	57890000		chr10	127670000	127680000	chr10	127990000	128000000		chr10	99160000	99170000	chr10	99370000	99380000		chr10	27730000	27740000	chr10	28530000	28540000		chr10	15160000	15170000	chr10	15400000	15410000		chr10	28720000	28730000	chr10	28810000	28820000
	chr10	93840000	93850000	chr10	94180000	94190000		chr10	5490000	5500000	chr10	5660000	5670000		chr10	127620000	127630000	chr10	128000000	128010000		chr10	115010000	115020000	chr10	115130000	115140000		chr10	27660000	27670000	chr10	28530000	28540000		chr10	46960000	46970000	chr10	47050000	47060000		chr10	73570000	73580000	chr10	73650000	73660000
	chr10	93840000	93850000	chr10	94050000	94060000		chr10	5480000	5490000	chr10	5910000	5920000		chr10	4550000	4560000	chr10	4800000	4810000		chr10	54400000	54410000	chr10	54490000	54500000		chr10	27650000	27660000	chr10	28470000	28480000		chr10	23120000	23130000	chr10	23350000	23360000		chr10	19980000	19990000	chr10	20070000	20080000
	chr10	93700000	93710000	chr10	94060000	94070000		chr10	25130000	25140000	chr10	25260000	25270000		chr10	4480000	4490000	chr10	4780000	4790000		chr10	112680000	112690000	chr10	112770000	112780000		chr10	27730000	27740000	chr10	27940000	27950000		chr10	4860000	4870000	chr10	5540000	5550000		chr10	129870000	129880000	chr10	129950000	129960000
	chr10	65390000	65400000	chr10	65470000	65480000		chr10	25190000	25200000	chr10	25350000	25360000		chr10	4550000	4560000	chr10	4690000	4700000		chr10	102430000	102440000	chr10	102600000	102610000		chr10	27650000	27660000	chr10	27940000	27950000		chr10	35910000	35920000	chr10	37170000	37180000		chr10	123550000	123560000	chr10	123630000	123640000
	chr10	93530000	93540000	chr10	93660000	93670000		chr10	92220000	92230000	chr10	92340000	92350000		chr10	4480000	4490000	chr10	4670000	4680000		chr10	62210000	62220000	chr10	62290000	62300000		chr10	134770000	134780000	chr10	135130000	135140000		chr10	7050000	7060000	chr10	7450000	7460000		chr10	105890000	105900000	chr10	105980000	105990000
	chr10	83600000	83610000	chr10	83890000	83900000		chr10	34940000	34950000	chr10	35480000	35490000		chr10	55600000	55610000	chr10	56160000	56170000		chr10	118580000	118590000	chr10	118660000	118670000		chr10	134740000	134750000	chr10	135040000	135050000		chr10	16880000	16890000	chr10	17390000	17400000		chr10	103920000	103930000	chr10	104010000	104020000
	chr10	5050000	5060000	chr10	5130000	5140000		chr10	35010000	35020000	chr10	35100000	35110000		chr10	55590000	55600000	chr10	55890000	55900000		chr10	5580000	5590000	chr10	5660000	5670000		chr10	49570000	49580000	chr10	49700000	49710000		chr10	74100000	74110000	chr10	74810000	74820000		chr10	104670000	104680000	chr10	104870000	104880000
	chr10	5010000	5020000	chr10	5440000	5450000		chr10	34950000	34960000	chr10	35270000	35280000		chr10	55600000	55610000	chr10	55840000	55850000		chr10	1310000	1320000	chr10	1390000	1400000		chr10	49570000	49580000	chr10	49860000	49870000		chr10	26620000	26630000	chr10	26700000	26710000		chr10	11230000	11240000	chr10	11310000	11320000
	chr10	5030000	5040000	chr10	5480000	5490000		chr10	58830000	58840000	chr10	59050000	59060000		chr10	55610000	55620000	chr10	55730000	55740000		chr10	70750000	70760000	chr10	70910000	70920000		chr10	93400000	93410000	chr10	93500000	93510000		chr10	3880000	3890000	chr10	4390000	4400000		chr10	112110000	112120000	chr10	112200000	112210000
	chr10	5030000	5040000	chr10	5320000	5330000		chr10	104590000	104600000	chr10	104670000	104680000		chr10	97800000	97810000	chr10	97890000	97900000		chr10	123800000	123810000	chr10	123960000	123970000		chr10	93390000	93400000	chr10	93670000	93680000		chr10	76010000	76020000	chr10	76730000	76740000		chr10	47600000	47610000	chr10	47680000	47690000
	chr10	69980000	69990000	chr10	70060000	70070000		chr10	104590000	104600000	chr10	105240000	105250000		chr10	97770000	97780000	chr10	97980000	97990000		chr10	94900000	94910000	chr10	95040000	95050000		chr10	24280000	24290000	chr10	24480000	24490000		chr10	23360000	23370000	chr10	23440000	23450000		chr10	88160000	88170000	chr10	88280000	88290000
	chr10	105820000	105830000	chr10	105960000	105970000		chr10	104590000	104600000	chr10	104820000	104830000		chr10	97770000	97780000	chr10	98050000	98060000		chr10	118830000	118840000	chr10	118910000	118920000		chr10	24280000	24290000	chr10	24800000	24810000		chr10	4170000	4180000	chr10	4700000	4710000		chr10	103230000	103240000	chr10	103310000	103320000
	chr10	105810000	105820000	chr10	106010000	106020000		chr10	30150000	30160000	chr10	30240000	30250000		chr10	30050000	30060000	chr10	30520000	30530000		chr10	6250000	6260000	chr10	6350000	6360000		chr10	24280000	24290000	chr10	24650000	24660000		chr10	15930000	15940000	chr10	16590000	16600000		chr10	88460000	88470000	chr10	88540000	88550000
	chr10	105800000	105810000	chr10	105880000	105890000		chr10	63800000	63810000	chr10	64000000	64010000		chr10	30030000	30040000	chr10	30220000	30230000		chr10	45410000	45420000	chr10	45490000	45500000		chr10	71180000	71190000	chr10	71260000	71270000		chr10	650000	660000	chr10	730000	740000		chr10	89630000	89640000	chr10	89720000	89730000
	chr10	118980000	118990000	chr10	119070000	119080000		chr10	63830000	63840000	chr10	64130000	64140000		chr10	30020000	30030000	chr10	30290000	30300000		chr10	28960000	28970000	chr10	29040000	29050000		chr10	71170000	71180000	chr10	71480000	71490000		chr10	3500000	3510000	chr10	3580000	3590000		chr10	71000000	71010000	chr10	71080000	71090000
	chr10	119000000	119010000	chr10	119230000	119240000		chr10	63870000	63880000	chr10	64140000	64150000		chr10	30030000	30040000	chr10	30140000	30150000		chr10	126510000	126520000	chr10	126600000	126610000		chr10	71170000	71180000	chr10	71400000	71410000		chr10	3730000	3740000	chr10	3810000	3820000		chr10	89300000	89310000	chr10	89400000	89410000
	chr10	5480000	5490000	chr10	5910000	5920000		chr10	56850000	56860000	chr10	57020000	57030000		chr10	121980000	121990000	chr10	122090000	122100000		chr10	45950000	45960000	chr10	46220000	46230000		chr10	125340000	125350000	chr10	126080000	126090000		chr10	4300000	4310000	chr10	4380000	4390000		chr10	38150000	38160000	chr10	38230000	38240000
	chr10	5490000	5500000	chr10	5650000	5660000		chr10	56760000	56770000	chr10	57020000	57030000		chr10	121980000	121990000	chr10	122490000	122500000		chr10	70090000	70100000	chr10	70170000	70180000		chr10	125340000	125350000	chr10	125720000	125730000		chr10	5050000	5060000	chr10	5130000	5140000		chr10	79610000	79620000	chr10	79690000	79700000
	chr10	5470000	5480000	chr10	5760000	5770000		chr10	56850000	56860000	chr10	57260000	57270000		chr10	82200000	82210000	chr10	82680000	82690000		chr10	52310000	52320000	chr10	52390000	52400000		chr10	7300000	7310000	chr10	7450000	7460000		chr10	7990000	8000000	chr10	8070000	8080000		chr10	106030000	106040000	chr10	106110000	106120000
	chr10	5480000	5490000	chr10	5800000	5810000		chr10	56810000	56820000	chr10	57180000	57190000		chr10	82140000	82150000	chr10	82680000	82690000		chr10	34820000	34830000	chr10	34900000	34910000		chr10	73880000	73890000	chr10	74080000	74090000		chr10	8430000	8440000	chr10	8510000	8520000		chr10	15490000	15500000	chr10	15650000	15660000
	chr10	21570000	21580000	chr10	22010000	22020000		chr10	56850000	56860000	chr10	57500000	57510000		chr10	82130000	82140000	chr10	82620000	82630000		chr10	97460000	97470000	chr10	97650000	97660000		chr10	73890000	73900000	chr10	73970000	73980000		chr10	11220000	11230000	chr10	11300000	11310000		chr10	11650000	11660000	chr10	11760000	11770000
	chr10	21570000	21580000	chr10	21780000	21790000		chr10	125340000	125350000	chr10	125720000	125730000		chr10	82200000	82210000	chr10	82280000	82290000		chr10	123510000	123520000	chr10	123630000	123640000		chr10	73800000	73810000	chr10	73980000	73990000		chr10	11640000	11650000	chr10	11720000	11730000		chr10	124190000	124200000	chr10	124320000	124330000
	chr10	21570000	21580000	chr10	21650000	21660000		chr10	125330000	125340000	chr10	125840000	125850000		chr10	82200000	82210000	chr10	82350000	82360000		chr10	29930000	29940000	chr10	30010000	30020000		chr10	38260000	38270000	chr10	38650000	38660000		chr10	14560000	14570000	chr10	14640000	14650000		chr10	88560000	88570000	chr10	88640000	88650000
	chr10	21560000	21570000	chr10	22240000	22250000		chr10	125340000	125350000	chr10	125420000	125430000		chr10	82120000	82130000	chr10	82360000	82370000		chr10	52260000	52270000	chr10	52380000	52390000		chr10	38300000	38310000	chr10	38380000	38390000		chr10	17190000	17200000	chr10	17270000	17280000		chr10	6490000	6500000	chr10	6570000	6580000
	chr10	125770000	125780000	chr10	125850000	125860000		chr10	125340000	125350000	chr10	126090000	126100000		chr10	82200000	82210000	chr10	82420000	82430000		chr10	60550000	60560000	chr10	60650000	60660000		chr10	38260000	38270000	chr10	38380000	38390000		chr10	21940000	21950000	chr10	22020000	22030000		chr10	94460000	94470000	chr10	94540000	94550000
	chr10	125750000	125760000	chr10	125970000	125980000		chr10	71980000	71990000	chr10	72120000	72130000		chr10	82130000	82140000	chr10	82770000	82780000		chr10	78140000	78150000	chr10	78290000	78300000		chr10	112060000	112070000	chr10	112500000	112510000		chr10	22710000	22720000	chr10	22790000	22800000		chr10	33080000	33090000	chr10	33180000	33190000
	chr10	125740000	125750000	chr10	126180000	126190000		chr10	71900000	71910000	chr10	72130000	72140000		chr10	105190000	105200000	chr10	105800000	105810000		chr10	49410000	49420000	chr10	49500000	49510000		chr10	112070000	112080000	chr10	112300000	112310000		chr10	23730000	23740000	chr10	23810000	23820000		chr10	78090000	78100000	chr10	78170000	78180000
	chr10	125750000	125760000	chr10	126080000	126090000		chr10	33470000	33480000	chr10	34170000	34180000		chr10	105250000	105260000	chr10	105330000	105340000		chr10	124810000	124820000	chr10	124890000	124900000		chr10	112060000	112070000	chr10	112630000	112640000		chr10	24490000	24500000	chr10	24570000	24580000		chr10	75040000	75050000	chr10	75120000	75130000
	chr10	34710000	34720000	chr10	34900000	34910000		chr10	33480000	33490000	chr10	33610000	33620000		chr10	105170000	105180000	chr10	105440000	105450000		chr10	72370000	72380000	chr10	72510000	72520000		chr10	62310000	62320000	chr10	62400000	62410000		chr10	25400000	25410000	chr10	25480000	25490000		chr10	31330000	31340000	chr10	31410000	31420000
	chr10	124800000	124810000	chr10	125130000	125140000		chr10	33480000	33490000	chr10	34590000	34600000		chr10	105260000	105270000	chr10	105620000	105630000		chr10	120970000	120980000	chr10	121050000	121060000		chr10	62310000	62320000	chr10	62510000	62520000		chr10	27940000	27950000	chr10	28020000	28030000		chr10	33490000	33500000	chr10	33570000	33580000
	chr10	124810000	124820000	chr10	124890000	124900000		chr10	33490000	33500000	chr10	33730000	33740000		chr10	105150000	105160000	chr10	105240000	105250000		chr10	125630000	125640000	chr10	125710000	125720000		chr10	25400000	25410000	chr10	26000000	26010000		chr10	28530000	28540000	chr10	28610000	28620000		chr10	12300000	12310000	chr10	12390000	12400000
	chr10	124800000	124810000	chr10	125300000	125310000		chr10	33490000	33500000	chr10	33900000	33910000		chr10	91350000	91360000	chr10	91450000	91460000		chr10	99320000	99330000	chr10	99400000	99410000		chr10	78920000	78930000	chr10	79400000	79410000		chr10	29330000	29340000	chr10	29410000	29420000		chr10	28820000	28830000	chr10	28900000	28910000
	chr10	124800000	124810000	chr10	125730000	125740000		chr10	33480000	33490000	chr10	33830000	33840000		chr10	91330000	91340000	chr10	91520000	91530000		chr10	21140000	21150000	chr10	21350000	21360000		chr10	78930000	78940000	chr10	79460000	79470000		chr10	30010000	30020000	chr10	30090000	30100000		chr10	5580000	5590000	chr10	5660000	5670000
	chr10	86020000	86030000	chr10	86290000	86300000		chr10	33470000	33480000	chr10	34020000	34030000		chr10	91340000	91350000	chr10	92410000	92420000		chr10	104250000	104260000	chr10	104390000	104400000		chr10	5500000	5510000	chr10	5910000	5920000		chr10	30060000	30070000	chr10	30140000	30150000		chr10	35160000	35170000	chr10	35240000	35250000
	chr10	86000000	86010000	chr10	86490000	86500000		chr10	33480000	33490000	chr10	34930000	34940000		chr10	91360000	91370000	chr10	91630000	91640000		chr10	134460000	134470000	chr10	134670000	134680000		chr10	5480000	5490000	chr10	5660000	5670000		chr10	31490000	31500000	chr10	31570000	31580000		chr10	5340000	5350000	chr10	5420000	5430000
	chr10	132490000	132500000	chr10	132790000	132800000		chr10	25520000	25530000	chr10	25710000	25720000		chr10	114330000	114340000	chr10	114630000	114640000		chr10	38150000	38160000	chr10	38230000	38240000		chr10	5480000	5490000	chr10	5820000	5830000		chr10	32210000	32220000	chr10	32290000	32300000		chr10	30330000	30340000	chr10	30520000	30530000
	chr10	64020000	64030000	chr10	64130000	64140000		chr10	25560000	25570000	chr10	25730000	25740000		chr10	114330000	114340000	chr10	114970000	114980000		chr10	30330000	30340000	chr10	30550000	30560000		chr10	22280000	22290000	chr10	22860000	22870000		chr10	33930000	33940000	chr10	34010000	34020000		chr10	126510000	126520000	chr10	126590000	126600000
	chr10	13390000	13400000	chr10	13570000	13580000		chr10	25530000	25540000	chr10	25950000	25960000		chr10	114320000	114330000	chr10	115140000	115150000		chr10	118550000	118560000	chr10	118770000	118780000		chr10	22290000	22300000	chr10	22930000	22940000		chr10	35170000	35180000	chr10	35250000	35260000		chr10	14600000	14610000	chr10	14860000	14870000
	chr10	13410000	13420000	chr10	13500000	13510000		chr10	73880000	73890000	chr10	73980000	73990000		chr10	114320000	114330000	chr10	114820000	114830000		chr10	43240000	43250000	chr10	43340000	43350000		chr10	22300000	22310000	chr10	23340000	23350000		chr10	35510000	35520000	chr10	35590000	35600000		chr10	6140000	6150000	chr10	6330000	6340000
	chr10	13410000	13420000	chr10	13820000	13830000		chr10	74000000	74010000	chr10	74080000	74090000		chr10	114320000	114330000	chr10	114880000	114890000		chr10	17490000	17500000	chr10	17630000	17640000		chr10	22290000	22300000	chr10	22600000	22610000		chr10	50610000	50620000	chr10	50690000	50700000		chr10	63900000	63910000	chr10	64000000	64010000
	chr10	8920000	8930000	chr10	9240000	9250000		chr10	44370000	44380000	chr10	44870000	44880000		chr10	114350000	114360000	chr10	114470000	114480000		chr10	104940000	104950000	chr10	105090000	105100000		chr10	22290000	22300000	chr10	22710000	22720000		chr10	54240000	54250000	chr10	54320000	54330000		chr10	78930000	78940000	chr10	79010000	79020000
	chr10	8920000	8930000	chr10	9110000	9120000		chr10	44380000	44390000	chr10	44520000	44530000		chr10	114320000	114330000	chr10	114720000	114730000		chr10	112250000	112260000	chr10	112330000	112340000		chr10	22290000	22300000	chr10	22530000	22540000		chr10	63410000	63420000	chr10	63490000	63500000		chr10	44680000	44690000	chr10	44770000	44780000
	chr10	8910000	8920000	chr10	9340000	9350000		chr10	53150000	53160000	chr10	53970000	53980000		chr10	114320000	114330000	chr10	115320000	115330000		chr10	81380000	81390000	chr10	81680000	81690000		chr10	22280000	22290000	chr10	22970000	22980000		chr10	64480000	64490000	chr10	64560000	64570000		chr10	70320000	70330000	chr10	70400000	70410000
	chr10	8830000	8840000	chr10	9340000	9350000		chr10	53150000	53160000	chr10	53720000	53730000		chr10	114320000	114330000	chr10	114550000	114560000		chr10	6320000	6330000	chr10	6430000	6440000		chr10	22280000	22290000	chr10	23270000	23280000		chr10	72300000	72310000	chr10	72380000	72390000		chr10	75130000	75140000	chr10	75230000	75240000
	chr10	49740000	49750000	chr10	50380000	50390000		chr10	22280000	22290000	chr10	22860000	22870000		chr10	33080000	33090000	chr10	33290000	33300000		chr10	52020000	52030000	chr10	52170000	52180000		chr10	75760000	75770000	chr10	75840000	75850000		chr10	73650000	73660000	chr10	73730000	73740000		chr10	88510000	88520000	chr10	88650000	88660000
	chr10	49770000	49780000	chr10	49850000	49860000		chr10	22290000	22300000	chr10	22600000	22610000		chr10	33080000	33090000	chr10	33230000	33240000		chr10	25410000	25420000	chr10	25540000	25550000		chr10	75760000	75770000	chr10	75980000	75990000		chr10	74450000	74460000	chr10	74530000	74540000		chr10	111650000	111660000	chr10	111730000	111740000
	chr10	76870000	76880000	chr10	76980000	76990000		chr10	22290000	22300000	chr10	22950000	22960000		chr10	33080000	33090000	chr10	33390000	33400000		chr10	97780000	97790000	chr10	97950000	97960000		chr10	71270000	71280000	chr10	71470000	71480000		chr10	75170000	75180000	chr10	75250000	75260000		chr10	45410000	45420000	chr10	45500000	45510000
	chr10	60540000	60550000	chr10	60760000	60770000		chr10	22290000	22300000	chr10	23130000	23140000		chr10	33080000	33090000	chr10	33570000	33580000		chr10	128570000	128580000	chr10	129110000	129120000		chr10	71280000	71290000	chr10	71380000	71390000		chr10	75880000	75890000	chr10	75960000	75970000		chr10	6290000	6300000	chr10	6440000	6450000
	chr10	60550000	60560000	chr10	60670000	60680000		chr10	22280000	22290000	chr10	23350000	23360000		chr10	84910000	84920000	chr10	85860000	85870000		chr10	14970000	14980000	chr10	15140000	15150000		chr10	25020000	25030000	chr10	25100000	25110000		chr10	80860000	80870000	chr10	80940000	80950000		chr10	128080000	128090000	chr10	128160000	128170000
	chr10	60540000	60550000	chr10	61360000	61370000		chr10	22300000	22310000	chr10	22430000	22440000		chr10	15920000	15930000	chr10	16580000	16590000		chr10	23820000	23830000	chr10	23980000	23990000		chr10	25010000	25020000	chr10	25240000	25250000		chr10	88190000	88200000	chr10	88270000	88280000		chr10	880000	890000	chr10	960000	970000
	chr10	60540000	60550000	chr10	60950000	60960000		chr10	22280000	22290000	chr10	23270000	23280000		chr10	15920000	15930000	chr10	17290000	17300000		chr10	60410000	60420000	chr10	60500000	60510000		chr10	25010000	25020000	chr10	25300000	25310000		chr10	88570000	88580000	chr10	88650000	88660000		chr10	27410000	27420000	chr10	27490000	27500000
	chr10	98820000	98830000	chr10	98970000	98980000		chr10	54400000	54410000	chr10	54480000	54490000		chr10	15940000	15950000	chr10	16470000	16480000		chr10	118760000	118770000	chr10	118920000	118930000		chr10	25010000	25020000	chr10	25360000	25370000		chr10	91090000	91100000	chr10	91170000	91180000		chr10	109170000	109180000	chr10	109570000	109580000
	chr10	80430000	80440000	chr10	80950000	80960000		chr10	92790000	92800000	chr10	93130000	93140000		chr10	15950000	15960000	chr10	16110000	16120000		chr10	111640000	111650000	chr10	111770000	111780000		chr10	24480000	24490000	chr10	24790000	24800000		chr10	94950000	94960000	chr10	95030000	95040000		chr10	125970000	125980000	chr10	126070000	126080000
	chr10	80440000	80450000	chr10	80730000	80740000		chr10	92770000	92780000	chr10	93290000	93300000		chr10	15940000	15950000	chr10	16820000	16830000		chr10	34950000	34960000	chr10	35200000	35210000		chr10	24530000	24540000	chr10	24770000	24780000		chr10	101280000	101290000	chr10	101360000	101370000		chr10	52080000	52090000	chr10	52180000	52190000
	chr10	80440000	80450000	chr10	80830000	80840000		chr10	92840000	92850000	chr10	93010000	93020000		chr10	18510000	18520000	chr10	18600000	18610000		chr10	115190000	115200000	chr10	115320000	115330000		chr10	24530000	24540000	chr10	24610000	24620000		chr10	103450000	103460000	chr10	103530000	103540000		chr10	72960000	72970000	chr10	73040000	73050000
	chr10	104590000	104600000	chr10	105230000	105240000		chr10	92780000	92790000	chr10	93380000	93390000		chr10	52540000	52550000	chr10	52650000	52660000		chr10	27760000	27770000	chr10	27840000	27850000		chr10	24910000	24920000	chr10	25120000	25130000		chr10	103590000	103600000	chr10	103670000	103680000		chr10	105470000	105480000	chr10	105550000	105560000
	chr10	104600000	104610000	chr10	104820000	104830000		chr10	50180000	50190000	chr10	50360000	50370000		chr10	13240000	13250000	chr10	13490000	13500000		chr10	35530000	35540000	chr10	35750000	35760000		chr10	24930000	24940000	chr10	25270000	25280000		chr10	104830000	104840000	chr10	104910000	104920000		chr10	31990000	32000000	chr10	32090000	32100000
	chr10	104580000	104590000	chr10	104670000	104680000		chr10	50180000	50190000	chr10	50590000	50600000		chr10	13250000	13260000	chr10	13550000	13560000		chr10	134140000	134150000	chr10	134260000	134270000		chr10	24850000	24860000	chr10	25260000	25270000		chr10	105530000	105540000	chr10	105610000	105620000		chr10	73060000	73070000	chr10	73140000	73150000
	chr10	104600000	104610000	chr10	105080000	105090000		chr10	50180000	50190000	chr10	50720000	50730000		chr10	13240000	13250000	chr10	13340000	13350000		chr10	111990000	112000000	chr10	112340000	112350000		chr10	24930000	24940000	chr10	25360000	25370000		chr10	105800000	105810000	chr10	105880000	105890000		chr10	86370000	86380000	chr10	86490000	86500000
	chr10	50620000	50630000	chr10	50710000	50720000		chr10	11560000	11570000	chr10	12040000	12050000		chr10	2660000	2670000	chr10	3080000	3090000		chr10	46970000	46980000	chr10	47070000	47080000		chr10	74300000	74310000	chr10	74600000	74610000		chr10	115060000	115070000	chr10	115140000	115150000		chr10	125750000	125760000	chr10	125950000	125960000
	chr10	131680000	131690000	chr10	131900000	131910000		chr10	11560000	11570000	chr10	11640000	11650000		chr10	2680000	2690000	chr10	2920000	2930000		chr10	113540000	113550000	chr10	113630000	113640000		chr10	28960000	28970000	chr10	29280000	29290000		chr10	115780000	115790000	chr10	115860000	115870000		chr10	33310000	33320000	chr10	33390000	33400000
	chr10	131680000	131690000	chr10	132110000	132120000		chr10	11550000	11560000	chr10	11790000	11800000		chr10	69830000	69840000	chr10	70650000	70660000		chr10	72670000	72680000	chr10	72820000	72830000		chr10	29040000	29050000	chr10	29250000	29260000		chr10	122910000	122920000	chr10	122990000	123000000		chr10	64950000	64960000	chr10	65030000	65040000
	chr10	33320000	33330000	chr10	33420000	33430000		chr10	129280000	129290000	chr10	129620000	129630000		chr10	69830000	69840000	chr10	70090000	70100000		chr10	122710000	122720000	chr10	122910000	122920000		chr10	28960000	28970000	chr10	29410000	29420000		chr10	134190000	134200000	chr10	134270000	134280000		chr10	55050000	55060000	chr10	55140000	55150000
	chr10	30020000	30030000	chr10	30130000	30140000		chr10	28390000	28400000	chr10	28660000	28670000		chr10	69840000	69850000	chr10	69960000	69970000		chr10	43780000	43790000	chr10	43860000	43870000		chr10	29040000	29050000	chr10	29400000	29410000		chr10	12660000	12670000	chr10	12750000	12760000		chr10	13830000	13840000	chr10	13930000	13940000
	chr10	30030000	30040000	chr10	30230000	30240000		chr10	114230000	114240000	chr10	114570000	114580000		chr10	22900000	22910000	chr10	22990000	23000000		chr10	119750000	119760000	chr10	119840000	119850000		chr10	28950000	28960000	chr10	29590000	29600000		chr10	14120000	14130000	chr10	14210000	14220000		chr10	120100000	120110000	chr10	120180000	120190000
	chr10	30020000	30030000	chr10	30280000	30290000		chr10	114230000	114240000	chr10	114970000	114980000		chr10	22860000	22870000	chr10	23270000	23280000		chr10	43640000	43650000	chr10	43720000	43730000		chr10	29010000	29020000	chr10	29580000	29590000		chr10	17330000	17340000	chr10	17420000	17430000		chr10	65630000	65640000	chr10	65720000	65730000
	chr10	18230000	18240000	chr10	18490000	18500000		chr10	114230000	114240000	chr10	115140000	115150000		chr10	23070000	23080000	chr10	23250000	23260000		chr10	74120000	74130000	chr10	74530000	74540000		chr10	28910000	28920000	chr10	29730000	29740000		chr10	30290000	30300000	chr10	30380000	30390000		chr10	68210000	68220000	chr10	68290000	68300000
	chr10	60700000	60710000	chr10	61360000	61370000		chr10	114230000	114240000	chr10	114900000	114910000		chr10	23010000	23020000	chr10	23270000	23280000		chr10	32340000	32350000	chr10	32550000	32560000		chr10	62580000	62590000	chr10	62900000	62910000		chr10	50090000	50100000	chr10	50180000	50190000		chr10	16980000	16990000	chr10	17290000	17300000
	chr10	60710000	60720000	chr10	60930000	60940000		chr10	114250000	114260000	chr10	114420000	114430000		chr10	22900000	22910000	chr10	23110000	23120000		chr10	2760000	2770000	chr10	2840000	2850000		chr10	62590000	62600000	chr10	63500000	63510000		chr10	64390000	64400000	chr10	64480000	64490000		chr10	81300000	81310000	chr10	81380000	81390000
	chr10	105250000	105260000	chr10	105330000	105340000		chr10	70550000	70560000	chr10	70650000	70660000		chr10	22850000	22860000	chr10	23140000	23150000		chr10	78660000	78670000	chr10	78740000	78750000		chr10	62570000	62580000	chr10	63040000	63050000		chr10	73470000	73480000	chr10	73560000	73570000		chr10	123490000	123500000	chr10	123650000	123660000
	chr10	105250000	105260000	chr10	105440000	105450000		chr10	70510000	70520000	chr10	70720000	70730000		chr10	22830000	22840000	chr10	23350000	23360000		chr10	34200000	34210000	chr10	34290000	34300000		chr10	62570000	62580000	chr10	62710000	62720000		chr10	104020000	104030000	chr10	104110000	104120000		chr10	80100000	80110000	chr10	80180000	80190000
	chr10	124890000	124900000	chr10	125140000	125150000		chr10	44890000	44900000	chr10	45350000	45360000		chr10	23050000	23060000	chr10	23340000	23350000		chr10	20100000	20110000	chr10	20180000	20190000		chr10	62560000	62570000	chr10	63570000	63580000		chr10	104840000	104850000	chr10	104930000	104940000		chr10	33750000	33760000	chr10	33850000	33860000
	chr10	124860000	124870000	chr10	125320000	125330000		chr10	44800000	44810000	chr10	45180000	45190000		chr10	50180000	50190000	chr10	50610000	50620000		chr10	72930000	72940000	chr10	73040000	73050000		chr10	62570000	62580000	chr10	63660000	63670000		chr10	48420000	48430000	chr10	48520000	48530000		chr10	135130000	135140000	chr10	135220000	135230000
	chr10	124870000	124880000	chr10	125740000	125750000		chr10	44890000	44900000	chr10	45170000	45180000		chr10	50180000	50190000	chr10	50720000	50730000		chr10	123580000	123590000	chr10	123660000	123670000		chr10	43360000	43370000	chr10	43820000	43830000		chr10	72020000	72030000	chr10	72120000	72130000		chr10	730000	740000	chr10	820000	830000
	chr10	80990000	81000000	chr10	81240000	81250000		chr10	44870000	44880000	chr10	45070000	45080000		chr10	50190000	50200000	chr10	50360000	50370000		chr10	71520000	71530000	chr10	71670000	71680000		chr10	43360000	43370000	chr10	43600000	43610000		chr10	114710000	114720000	chr10	114810000	114820000		chr10	114940000	114950000	chr10	115020000	115030000
	chr10	16450000	16460000	chr10	16810000	16820000		chr10	24190000	24200000	chr10	24830000	24840000		chr10	74450000	74460000	chr10	74590000	74600000		chr10	60550000	60560000	chr10	60710000	60720000		chr10	43360000	43370000	chr10	43950000	43960000		chr10	62210000	62220000	chr10	62330000	62340000		chr10	121210000	121220000	chr10	121300000	121310000
	chr10	59610000	59620000	chr10	59920000	59930000		chr10	24180000	24190000	chr10	24470000	24480000		chr10	35630000	35640000	chr10	35740000	35750000		chr10	60540000	60550000	chr10	60750000	60760000		chr10	3840000	3850000	chr10	4170000	4180000		chr10	12760000	12770000	chr10	12890000	12900000		chr10	124400000	124410000	chr10	124490000	124500000
	chr10	59610000	59620000	chr10	59810000	59820000		chr10	111890000	111900000	chr10	112030000	112040000		chr10	35630000	35640000	chr10	35840000	35850000		chr10	78070000	78080000	chr10	78300000	78310000		chr10	3960000	3970000	chr10	4160000	4170000		chr10	64190000	64200000	chr10	64320000	64330000		chr10	16890000	16900000	chr10	17020000	17030000
	chr10	73340000	73350000	chr10	73560000	73570000		chr10	111900000	111910000	chr10	112330000	112340000		chr10	65630000	65640000	chr10	65730000	65740000		chr10	69740000	69750000	chr10	69950000	69960000		chr10	3900000	3910000	chr10	4170000	4180000		chr10	77010000	77020000	chr10	77140000	77150000		chr10	104740000	104750000	chr10	105010000	105020000
	chr10	73400000	73410000	chr10	73580000	73590000		chr10	133860000	133870000	chr10	133940000	133950000		chr10	35530000	35540000	chr10	35610000	35620000		chr10	34760000	34770000	chr10	34920000	34930000		chr10	3910000	3920000	chr10	4100000	4110000		chr10	86010000	86020000	chr10	86140000	86150000		chr10	20000000	20010000	chr10	20090000	20100000
	chr10	73370000	73380000	chr10	73450000	73460000		chr10	49870000	49880000	chr10	50370000	50380000		chr10	35530000	35540000	chr10	35760000	35770000		chr10	18350000	18360000	chr10	18500000	18510000		chr10	3840000	3850000	chr10	4100000	4110000		chr10	101670000	101680000	chr10	101800000	101810000		chr10	109410000	109420000	chr10	109490000	109500000
	chr10	135150000	135160000	chr10	135420000	135430000		chr10	49860000	49870000	chr10	50180000	50190000		chr10	35520000	35530000	chr10	37070000	37080000		chr10	123500000	123510000	chr10	123660000	123670000		chr10	3940000	3950000	chr10	4690000	4700000		chr10	4100000	4110000	chr10	4240000	4250000		chr10	96030000	96040000	chr10	96200000	96210000
	chr10	128210000	128220000	chr10	128290000	128300000		chr10	49920000	49930000	chr10	50080000	50090000		chr10	124640000	124650000	chr10	124750000	124760000		chr10	72840000	72850000	chr10	72930000	72940000		chr10	3820000	3830000	chr10	3900000	3910000		chr10	7130000	7140000	chr10	7270000	7280000		chr10	126220000	126230000	chr10	126390000	126400000
	chr10	79150000	79160000	chr10	79460000	79470000		chr10	67710000	67720000	chr10	67920000	67930000		chr10	24280000	24290000	chr10	24480000	24490000		chr10	128580000	128590000	chr10	128810000	128820000		chr10	3840000	3850000	chr10	3980000	3990000		chr10	21560000	21570000	chr10	21700000	21710000		chr10	29800000	29810000	chr10	29880000	29890000
	chr10	79140000	79150000	chr10	79380000	79390000		chr10	101500000	101510000	chr10	101840000	101850000		chr10	24280000	24290000	chr10	24650000	24660000		chr10	78790000	78800000	chr10	78870000	78880000		chr10	3830000	3840000	chr10	4800000	4810000		chr10	71410000	71420000	chr10	71550000	71560000		chr10	18300000	18310000	chr10	18390000	18400000
	chr10	950000	960000	chr10	1030000	1040000		chr10	101510000	101520000	chr10	101960000	101970000		chr10	24280000	24290000	chr10	24800000	24810000		chr10	86020000	86030000	chr10	86170000	86180000		chr10	3930000	3940000	chr10	4810000	4820000		chr10	125930000	125940000	chr10	126070000	126080000		chr10	125930000	125940000	chr10	126070000	126080000
	chr10	94850000	94860000	chr10	95430000	95440000		chr10	101500000	101510000	chr10	101580000	101590000		chr10	91770000	91780000	chr10	92120000	92130000		chr10	127440000	127450000	chr10	127530000	127540000		chr10	3940000	3950000	chr10	4310000	4320000		chr10	940000	950000	chr10	1090000	1100000		chr10	11090000	11100000	chr10	11300000	11310000
	chr10	94860000	94870000	chr10	95040000	95050000		chr10	98410000	98420000	chr10	98770000	98780000		chr10	91710000	91720000	chr10	92620000	92630000		chr10	14550000	14560000	chr10	14630000	14640000		chr10	3850000	3860000	chr10	4390000	4400000		chr10	3560000	3570000	chr10	3710000	3720000		chr10	77060000	77070000	chr10	77140000	77150000
	chr10	94780000	94790000	chr10	95050000	95060000		chr10	98400000	98410000	chr10	98500000	98510000		chr10	91750000	91760000	chr10	92630000	92640000		chr10	91190000	91200000	chr10	91520000	91530000		chr10	3950000	3960000	chr10	4380000	4390000		chr10	74130000	74140000	chr10	74280000	74290000		chr10	26630000	26640000	chr10	26710000	26720000
	chr10	94770000	94780000	chr10	95260000	95270000		chr10	98390000	98400000	chr10	98580000	98590000		chr10	91710000	91720000	chr10	92350000	92360000		chr10	120010000	120020000	chr10	120180000	120190000		chr10	13700000	13710000	chr10	13810000	13820000		chr10	94950000	94960000	chr10	95100000	95110000		chr10	44190000	44200000	chr10	44270000	44280000
	chr10	90690000	90700000	chr10	91140000	91150000		chr10	98390000	98400000	chr10	98960000	98970000		chr10	91710000	91720000	chr10	92430000	92440000		chr10	43310000	43320000	chr10	43600000	43610000		chr10	13680000	13690000	chr10	14130000	14140000		chr10	105190000	105200000	chr10	105340000	105350000		chr10	103450000	103460000	chr10	103530000	103540000
	chr10	90690000	90700000	chr10	90970000	90980000		chr10	43360000	43370000	chr10	43600000	43610000		chr10	91710000	91720000	chr10	91900000	91910000		chr10	6840000	6850000	chr10	6920000	6930000		chr10	24680000	24690000	chr10	24790000	24800000		chr10	15240000	15250000	chr10	15400000	15410000		chr10	77810000	77820000	chr10	77890000	77900000
	chr10	99550000	99560000	chr10	99790000	99800000		chr10	43240000	43250000	chr10	43600000	43610000		chr10	117110000	117120000	chr10	118140000	118150000		chr10	38420000	38430000	chr10	38670000	38680000		chr10	72560000	72570000	chr10	73010000	73020000		chr10	24280000	24290000	chr10	24440000	24450000		chr10	88220000	88230000	chr10	88340000	88350000
	chr10	99550000	99560000	chr10	99630000	99640000		chr10	43330000	43340000	chr10	43950000	43960000		chr10	117110000	117120000	chr10	118050000	118060000		chr10	52090000	52100000	chr10	52370000	52380000		chr10	72560000	72570000	chr10	72640000	72650000		chr10	28300000	28310000	chr10	28460000	28470000		chr10	115140000	115150000	chr10	115280000	115290000
	chr10	61500000	61510000	chr10	61810000	61820000		chr10	54580000	54590000	chr10	55060000	55070000		chr10	117110000	117120000	chr10	117330000	117340000		chr10	26050000	26060000	chr10	26130000	26140000		chr10	72510000	72520000	chr10	72640000	72650000		chr10	93310000	93320000	chr10	93470000	93480000		chr10	25410000	25420000	chr10	25500000	25510000
	chr10	114710000	114720000	chr10	115130000	115140000		chr10	54560000	54570000	chr10	54960000	54970000		chr10	117100000	117110000	chr10	117450000	117460000		chr10	121510000	121520000	chr10	121710000	121720000		chr10	129700000	129710000	chr10	129800000	129810000		chr10	116240000	116250000	chr10	116400000	116410000		chr10	96420000	96430000	chr10	96510000	96520000
	chr10	114730000	114740000	chr10	114890000	114900000		chr10	54570000	54580000	chr10	54930000	54940000		chr10	117100000	117110000	chr10	117180000	117190000		chr10	78930000	78940000	chr10	79020000	79030000		chr10	129680000	129690000	chr10	129940000	129950000		chr10	122830000	122840000	chr10	122990000	123000000		chr10	120470000	120480000	chr10	120550000	120560000
	chr10	72210000	72220000	chr10	72510000	72520000		chr10	54570000	54580000	chr10	54840000	54850000		chr10	93510000	93520000	chr10	93670000	93680000		chr10	44180000	44190000	chr10	44490000	44500000		chr10	17060000	17070000	chr10	17270000	17280000		chr10	370000	380000	chr10	540000	550000		chr10	23040000	23050000	chr10	23120000	23130000
	chr10	72210000	72220000	chr10	72300000	72310000		chr10	54600000	54610000	chr10	54690000	54700000		chr10	93520000	93530000	chr10	94190000	94200000		chr10	54060000	54070000	chr10	54390000	54400000		chr10	114550000	114560000	chr10	114710000	114720000		chr10	8740000	8750000	chr10	8910000	8920000		chr10	23280000	23290000	chr10	23360000	23370000
	chr10	121350000	121360000	chr10	121600000	121610000		chr10	18970000	18980000	chr10	21040000	21050000		chr10	9390000	9400000	chr10	9770000	9780000		chr10	75530000	75540000	chr10	75620000	75630000		chr10	114550000	114560000	chr10	114850000	114860000		chr10	24610000	24620000	chr10	24780000	24790000		chr10	125550000	125560000	chr10	125640000	125650000
	chr10	121370000	121380000	chr10	121570000	121580000		chr10	18980000	18990000	chr10	20090000	20100000		chr10	9460000	9470000	chr10	9610000	9620000		chr10	125160000	125170000	chr10	125310000	125320000		chr10	29870000	29880000	chr10	30140000	30150000		chr10	73470000	73480000	chr10	73640000	73650000		chr10	120330000	120340000	chr10	120520000	120530000
	chr10	93040000	93050000	chr10	93430000	93440000		chr10	18980000	18990000	chr10	21140000	21150000		chr10	9390000	9400000	chr10	9630000	9640000		chr10	99030000	99040000	chr10	99200000	99210000		chr10	29810000	29820000	chr10	30290000	30300000		chr10	92670000	92680000	chr10	92840000	92850000		chr10	120860000	120870000	chr10	120940000	120950000
	chr10	93050000	93060000	chr10	93300000	93310000		chr10	93050000	93060000	chr10	93130000	93140000		chr10	9470000	9480000	chr10	9920000	9930000		chr10	133330000	133340000	chr10	133490000	133500000		chr10	29800000	29810000	chr10	30030000	30040000		chr10	105250000	105260000	chr10	105420000	105430000		chr10	33070000	33080000	chr10	33150000	33160000
	chr10	93060000	93070000	chr10	93160000	93170000		chr10	93060000	93070000	chr10	93280000	93290000		chr10	9370000	9380000	chr10	9900000	9910000		chr10	88380000	88390000	chr10	88660000	88670000		chr10	63030000	63040000	chr10	63500000	63510000		chr10	29100000	29110000	chr10	29280000	29290000		chr10	74640000	74650000	chr10	74730000	74740000
	chr10	8580000	8590000	chr10	9240000	9250000		chr10	93070000	93080000	chr10	93480000	93490000		chr10	9380000	9390000	chr10	11070000	11080000		chr10	550000	560000	chr10	720000	730000		chr10	63030000	63040000	chr10	63650000	63660000		chr10	32540000	32550000	chr10	32720000	32730000		chr10	74140000	74150000	chr10	74220000	74230000
	chr10	8630000	8640000	chr10	8910000	8920000		chr10	93050000	93060000	chr10	93670000	93680000		chr10	9380000	9390000	chr10	11310000	11320000		chr10	72650000	72660000	chr10	72740000	72750000		chr10	63040000	63050000	chr10	63630000	63640000		chr10	45960000	45970000	chr10	46140000	46150000		chr10	32540000	32550000	chr10	32730000	32740000
	chr10	8570000	8580000	chr10	8900000	8910000		chr10	93060000	93070000	chr10	93380000	93390000		chr10	9370000	9380000	chr10	11510000	11520000		chr10	62200000	62210000	chr10	62330000	62340000		chr10	80180000	80190000	chr10	80960000	80970000		chr10	59930000	59940000	chr10	60110000	60120000		chr10	14420000	14430000	chr10	14500000	14510000
	chr10	8650000	8660000	chr10	8860000	8870000		chr10	98670000	98680000	chr10	98780000	98790000		chr10	9390000	9400000	chr10	10260000	10270000		chr10	82040000	82050000	chr10	82120000	82130000		chr10	80180000	80190000	chr10	80420000	80430000		chr10	70300000	70310000	chr10	70480000	70490000		chr10	128000000	128010000	chr10	128080000	128090000
	chr10	8650000	8660000	chr10	8730000	8740000		chr10	98680000	98690000	chr10	98970000	98980000		chr10	106810000	106820000	chr10	107940000	107950000		chr10	124280000	124290000	chr10	124460000	124470000		chr10	43780000	43790000	chr10	43860000	43870000		chr10	71980000	71990000	chr10	72160000	72170000		chr10	74130000	74140000	chr10	74270000	74280000
	chr10	8670000	8680000	chr10	9330000	9340000		chr10	45430000	45440000	chr10	45720000	45730000		chr10	106840000	106850000	chr10	107070000	107080000		chr10	117450000	117460000	chr10	118150000	118160000		chr10	43780000	43790000	chr10	43950000	43960000		chr10	89710000	89720000	chr10	89890000	89900000		chr10	100060000	100070000	chr10	100150000	100160000
	chr10	116380000	116390000	chr10	116470000	116480000		chr10	11450000	11460000	chr10	12040000	12050000		chr10	106820000	106830000	chr10	107450000	107460000		chr10	28300000	28310000	chr10	28460000	28470000		chr10	118970000	118980000	chr10	119190000	119200000		chr10	95120000	95130000	chr10	95300000	95310000		chr10	99410000	99420000	chr10	99490000	99500000
	chr10	116390000	116400000	chr10	116540000	116550000		chr10	11470000	11480000	chr10	11800000	11810000		chr10	106820000	106830000	chr10	107220000	107230000		chr10	61090000	61100000	chr10	61330000	61340000		chr10	118980000	118990000	chr10	119070000	119080000		chr10	96940000	96950000	chr10	97120000	97130000		chr10	112680000	112690000	chr10	112770000	112780000
	chr10	71280000	71290000	chr10	71490000	71500000		chr10	37710000	37720000	chr10	37790000	37800000		chr10	106810000	106820000	chr10	107690000	107700000		chr10	45260000	45270000	chr10	45350000	45360000		chr10	12390000	12400000	chr10	12680000	12690000		chr10	122700000	122710000	chr10	122880000	122890000		chr10	1020000	1030000	chr10	1100000	1110000
	chr10	71280000	71290000	chr10	71390000	71400000		chr10	37720000	37730000	chr10	38040000	38050000		chr10	119250000	119260000	chr10	120090000	120100000		chr10	125050000	125060000	chr10	125290000	125300000		chr10	31360000	31370000	chr10	32090000	32100000		chr10	12920000	12930000	chr10	13110000	13120000		chr10	92670000	92680000	chr10	92850000	92860000
	chr10	61390000	61400000	chr10	61810000	61820000		chr10	62900000	62910000	chr10	63040000	63050000		chr10	119290000	119300000	chr10	119440000	119450000		chr10	64970000	64980000	chr10	65110000	65120000		chr10	31370000	31380000	chr10	31760000	31770000		chr10	16620000	16630000	chr10	16810000	16820000		chr10	124800000	124810000	chr10	124890000	124900000
	chr10	61410000	61420000	chr10	61740000	61750000		chr10	62920000	62930000	chr10	63480000	63490000		chr10	119260000	119270000	chr10	119440000	119450000		chr10	114240000	114250000	chr10	114960000	114970000		chr10	31310000	31320000	chr10	31600000	31610000		chr10	25010000	25020000	chr10	25200000	25210000		chr10	45240000	45250000	chr10	45330000	45340000
	chr10	61400000	61410000	chr10	61490000	61500000		chr10	65390000	65400000	chr10	65470000	65480000		chr10	119250000	119260000	chr10	119860000	119870000		chr10	120550000	120560000	chr10	120770000	120780000		chr10	103990000	104000000	chr10	104100000	104110000		chr10	88700000	88710000	chr10	88890000	88900000		chr10	133740000	133750000	chr10	133830000	133840000
	chr10	61380000	61390000	chr10	61660000	61670000		chr10	76650000	76660000	chr10	76750000	76760000		chr10	119290000	119300000	chr10	120000000	120010000		chr10	93510000	93520000	chr10	93760000	93770000		chr10	104000000	104010000	chr10	104350000	104360000		chr10	1210000	1220000	chr10	1410000	1420000		chr10	90330000	90340000	chr10	90440000	90450000
	chr10	61380000	61390000	chr10	61560000	61570000		chr10	76580000	76590000	chr10	76860000	76870000		chr10	119250000	119260000	chr10	120320000	120330000		chr10	12300000	12310000	chr10	12380000	12390000		chr10	103980000	103990000	chr10	104240000	104250000		chr10	8200000	8210000	chr10	8400000	8410000		chr10	8660000	8670000	chr10	8740000	8750000
	chr10	91570000	91580000	chr10	92360000	92370000		chr10	76630000	76640000	chr10	76850000	76860000		chr10	119180000	119190000	chr10	120300000	120310000		chr10	33340000	33350000	chr10	33430000	33440000		chr10	14670000	14680000	chr10	14860000	14870000		chr10	13830000	13840000	chr10	14030000	14040000		chr10	86210000	86220000	chr10	86290000	86300000
	chr10	91540000	91550000	chr10	92370000	92380000		chr10	92510000	92520000	chr10	92620000	92630000		chr10	119250000	119260000	chr10	120180000	120190000		chr10	4640000	4650000	chr10	4810000	4820000		chr10	14640000	14650000	chr10	15000000	15010000		chr10	73360000	73370000	chr10	73560000	73570000		chr10	72750000	72760000	chr10	72940000	72950000
	chr10	91560000	91570000	chr10	91900000	91910000		chr10	92510000	92520000	chr10	93010000	93020000		chr10	119190000	119200000	chr10	120180000	120190000		chr10	75150000	75160000	chr10	75390000	75400000		chr10	111640000	111650000	chr10	111890000	111900000		chr10	76570000	76580000	chr10	76770000	76780000		chr10	62210000	62220000	chr10	62290000	62300000
	chr10	91580000	91590000	chr10	91940000	91950000		chr10	92500000	92510000	chr10	92730000	92740000		chr10	62310000	62320000	chr10	62400000	62410000		chr10	74220000	74230000	chr10	74600000	74610000		chr10	111650000	111660000	chr10	111770000	111780000		chr10	105800000	105810000	chr10	106000000	106010000		chr10	58080000	58090000	chr10	58170000	58180000
	chr10	91560000	91570000	chr10	92600000	92610000		chr10	126090000	126100000	chr10	126180000	126190000		chr10	62310000	62320000	chr10	62520000	62530000		chr10	131670000	131680000	chr10	131840000	131850000		chr10	111650000	111660000	chr10	112040000	112050000		chr10	124940000	124950000	chr10	125140000	125150000		chr10	125400000	125410000	chr10	125720000	125730000
	chr10	91600000	91610000	chr10	91690000	91700000		chr10	126100000	126110000	chr10	126420000	126430000		chr10	73140000	73150000	chr10	73240000	73250000		chr10	107770000	107780000	chr10	107910000	107920000		chr10	96100000	96110000	chr10	96200000	96210000		chr10	4100000	4110000	chr10	4310000	4320000		chr10	30800000	30810000	chr10	30880000	30890000
	chr10	91560000	91570000	chr10	91700000	91710000		chr10	126100000	126110000	chr10	126330000	126340000		chr10	73150000	73160000	chr10	73460000	73470000		chr10	77880000	77890000	chr10	78300000	78310000		chr10	112170000	112180000	chr10	112250000	112260000		chr10	12540000	12550000	chr10	12750000	12760000		chr10	115200000	115210000	chr10	115280000	115290000
	chr10	63030000	63040000	chr10	63580000	63590000		chr10	14900000	14910000	chr10	15010000	15020000		chr10	73140000	73150000	chr10	73560000	73570000		chr10	91580000	91590000	chr10	91780000	91790000		chr10	63850000	63860000	chr10	63990000	64000000		chr10	62580000	62590000	chr10	62790000	62800000		chr10	52320000	52330000	chr10	52410000	52420000
	chr10	63070000	63080000	chr10	63490000	63500000		chr10	14940000	14950000	chr10	15140000	15150000		chr10	73140000	73150000	chr10	73320000	73330000		chr10	13140000	13150000	chr10	13220000	13230000		chr10	81890000	81900000	chr10	81970000	81980000		chr10	72820000	72830000	chr10	73030000	73040000		chr10	74760000	74770000	chr10	74920000	74930000
	chr10	86160000	86170000	chr10	86290000	86300000		chr10	53750000	53760000	chr10	53960000	53970000		chr10	124200000	124210000	chr10	124320000	124330000		chr10	14880000	14890000	chr10	15140000	15150000		chr10	134750000	134760000	chr10	134930000	134940000		chr10	90690000	90700000	chr10	90900000	90910000		chr10	63250000	63260000	chr10	63340000	63350000
	chr10	29800000	29810000	chr10	30140000	30150000		chr10	79470000	79480000	chr10	79760000	79770000		chr10	124190000	124200000	chr10	124460000	124470000		chr10	86330000	86340000	chr10	86420000	86430000		chr10	103620000	103630000	chr10	103700000	103710000		chr10	98150000	98160000	chr10	98360000	98370000		chr10	21580000	21590000	chr10	21660000	21670000
	chr10	94720000	94730000	chr10	94820000	94830000		chr10	5990000	6000000	chr10	6440000	6450000		chr10	90440000	90450000	chr10	90560000	90570000		chr10	460000	470000	chr10	540000	550000		chr10	116460000	116470000	chr10	116540000	116550000		chr10	4010000	4020000	chr10	4230000	4240000		chr10	8100000	8110000	chr10	8180000	8190000
	chr10	94720000	94730000	chr10	95040000	95050000		chr10	6020000	6030000	chr10	6380000	6390000		chr10	90440000	90450000	chr10	90620000	90630000		chr10	125410000	125420000	chr10	125710000	125720000		chr10	97970000	97980000	chr10	98050000	98060000		chr10	63500000	63510000	chr10	63720000	63730000		chr10	94640000	94650000	chr10	94830000	94840000
	chr10	26610000	26620000	chr10	27180000	27190000		chr10	5990000	6000000	chr10	6140000	6150000		chr10	101320000	101330000	chr10	101470000	101480000		chr10	14400000	14410000	chr10	14490000	14500000		chr10	45960000	45970000	chr10	46100000	46110000		chr10	65160000	65170000	chr10	65380000	65390000		chr10	120650000	120660000	chr10	120740000	120750000
	chr10	26620000	26630000	chr10	26840000	26850000		chr10	76870000	76880000	chr10	76980000	76990000		chr10	76780000	76790000	chr10	76990000	77000000		chr10	35530000	35540000	chr10	35780000	35790000		chr10	71060000	71070000	chr10	71150000	71160000		chr10	73070000	73080000	chr10	73290000	73300000		chr10	89770000	89780000	chr10	90300000	90310000
	chr10	13830000	13840000	chr10	14040000	14050000		chr10	75280000	75290000	chr10	75400000	75410000		chr10	76780000	76790000	chr10	76860000	76870000		chr10	124830000	124840000	chr10	125310000	125320000		chr10	73170000	73180000	chr10	73250000	73260000		chr10	82200000	82210000	chr10	82420000	82430000		chr10	5930000	5940000	chr10	6010000	6020000
	chr10	13830000	13840000	chr10	14130000	14140000		chr10	71730000	71740000	chr10	71820000	71830000		chr10	75280000	75290000	chr10	75470000	75480000		chr10	133280000	133290000	chr10	133370000	133380000		chr10	102970000	102980000	chr10	103050000	103060000		chr10	116060000	116070000	chr10	116280000	116290000		chr10	133850000	133860000	chr10	133950000	133960000
	chr10	13850000	13860000	chr10	14200000	14210000		chr10	71720000	71730000	chr10	72140000	72150000		chr10	75280000	75290000	chr10	75400000	75410000		chr10	126840000	126850000	chr10	127140000	127150000		chr10	43860000	43870000	chr10	43940000	43950000		chr10	33200000	33210000	chr10	33430000	33440000		chr10	65180000	65190000	chr10	65380000	65390000
	chr10	13840000	13850000	chr10	14540000	14550000		chr10	33860000	33870000	chr10	34050000	34060000		chr10	93810000	93820000	chr10	94310000	94320000		chr10	17000000	17010000	chr10	17280000	17290000		chr10	6980000	6990000	chr10	7060000	7070000		chr10	54710000	54720000	chr10	54940000	54950000		chr10	20100000	20110000	chr10	20510000	20520000
	chr10	55770000	55780000	chr10	56160000	56170000		chr10	94760000	94770000	chr10	95040000	95050000		chr10	93760000	93770000	chr10	94380000	94390000		chr10	70880000	70890000	chr10	71150000	71160000		chr10	104680000	104690000	chr10	104760000	104770000		chr10	63360000	63370000	chr10	63590000	63600000		chr10	122350000	122360000	chr10	122440000	122450000
	chr10	12390000	12400000	chr10	12730000	12740000		chr10	94760000	94770000	chr10	95110000	95120000		chr10	93840000	93850000	chr10	94050000	94060000		chr10	30290000	30300000	chr10	30490000	30500000		chr10	93520000	93530000	chr10	93610000	93620000		chr10	88150000	88160000	chr10	88380000	88390000		chr10	54400000	54410000	chr10	54540000	54550000
	chr10	12380000	12390000	chr10	12690000	12700000		chr10	94760000	94770000	chr10	95260000	95270000		chr10	93690000	93700000	chr10	94030000	94040000		chr10	16600000	16610000	chr10	16840000	16850000		chr10	17650000	17660000	chr10	17730000	17740000		chr10	115470000	115480000	chr10	115700000	115710000		chr10	96890000	96900000	chr10	97120000	97130000
	chr10	12370000	12380000	chr10	13110000	13120000		chr10	112830000	112840000	chr10	113020000	113030000		chr10	93710000	93720000	chr10	93790000	93800000		chr10	44180000	44190000	chr10	44620000	44630000		chr10	5540000	5550000	chr10	5650000	5660000		chr10	118690000	118700000	chr10	118920000	118930000		chr10	22150000	22160000	chr10	22230000	22240000
	chr10	12380000	12390000	chr10	12490000	12500000		chr10	112810000	112820000	chr10	113350000	113360000		chr10	93840000	93850000	chr10	94190000	94200000		chr10	76020000	76030000	chr10	76190000	76200000		chr10	126230000	126240000	chr10	126340000	126350000		chr10	50190000	50200000	chr10	50430000	50440000		chr10	123890000	123900000	chr10	123980000	123990000
	chr10	7310000	7320000	chr10	7430000	7440000		chr10	103560000	103570000	chr10	103900000	103910000		chr10	93850000	93860000	chr10	93950000	93960000		chr10	119290000	119300000	chr10	119620000	119630000		chr10	98880000	98890000	chr10	98960000	98970000		chr10	105470000	105480000	chr10	105710000	105720000		chr10	62100000	62110000	chr10	62180000	62190000
	chr10	73080000	73090000	chr10	73560000	73570000		chr10	103600000	103610000	chr10	103760000	103770000		chr10	27510000	27520000	chr10	27780000	27790000		chr10	98240000	98250000	chr10	98510000	98520000		chr10	98590000	98600000	chr10	98670000	98680000		chr10	12760000	12770000	chr10	13010000	13020000		chr10	77170000	77180000	chr10	77370000	77380000
	chr10	73080000	73090000	chr10	73660000	73670000		chr10	49560000	49570000	chr10	49810000	49820000		chr10	27540000	27550000	chr10	27640000	27650000		chr10	76020000	76030000	chr10	76320000	76330000		chr10	6280000	6290000	chr10	6440000	6450000		chr10	28030000	28040000	chr10	28280000	28290000		chr10	65350000	65360000	chr10	65470000	65480000
	chr10	73070000	73080000	chr10	73460000	73470000		chr10	49570000	49580000	chr10	49710000	49720000		chr10	94840000	94850000	chr10	95040000	95050000		chr10	37190000	37200000	chr10	37420000	37430000		chr10	106020000	106030000	chr10	106110000	106120000		chr10	77160000	77170000	chr10	77410000	77420000		chr10	97130000	97140000	chr10	97220000	97230000
	chr10	73070000	73080000	chr10	73270000	73280000		chr10	49520000	49530000	chr10	49620000	49630000		chr10	94750000	94760000	chr10	95050000	95060000		chr10	21950000	21960000	chr10	22240000	22250000		chr10	101680000	101690000	chr10	101770000	101780000		chr10	77800000	77810000	chr10	78050000	78060000		chr10	17540000	17550000	chr10	17630000	17640000
	chr10	3980000	3990000	chr10	4310000	4320000		chr10	490000	500000	chr10	820000	830000		chr10	94760000	94770000	chr10	95110000	95120000		chr10	79820000	79830000	chr10	79900000	79910000		chr10	123550000	123560000	chr10	123650000	123660000		chr10	98150000	98160000	chr10	98400000	98410000		chr10	70390000	70400000	chr10	70470000	70480000
	chr10	3960000	3970000	chr10	4090000	4100000		chr10	450000	460000	chr10	740000	750000		chr10	94830000	94840000	chr10	95270000	95280000		chr10	118650000	118660000	chr10	118930000	118940000		chr10	72430000	72440000	chr10	72510000	72520000		chr10	33080000	33090000	chr10	33340000	33350000		chr10	76030000	76040000	chr10	76330000	76340000
	chr10	4010000	4020000	chr10	4170000	4180000		chr10	123800000	123810000	chr10	123970000	123980000		chr10	94850000	94860000	chr10	95440000	95450000		chr10	61540000	61550000	chr10	61800000	61810000		chr10	90880000	90890000	chr10	90960000	90970000		chr10	102970000	102980000	chr10	103230000	103240000		chr10	125340000	125350000	chr10	125500000	125510000
	chr10	4000000	4010000	chr10	4800000	4810000		chr10	123810000	123820000	chr10	123890000	123900000		chr10	90160000	90170000	chr10	90530000	90540000		chr10	101510000	101520000	chr10	101850000	101860000		chr10	111640000	111650000	chr10	111720000	111730000		chr10	104600000	104610000	chr10	104860000	104870000		chr10	6820000	6830000	chr10	7450000	7460000
	chr10	11830000	11840000	chr10	12020000	12030000		chr10	89600000	89610000	chr10	90010000	90020000		chr10	90160000	90170000	chr10	90310000	90320000		chr10	104460000	104470000	chr10	104730000	104740000		chr10	74350000	74360000	chr10	74600000	74610000		chr10	3900000	3910000	chr10	4170000	4180000		chr10	102510000	102520000	chr10	102590000	102600000
	chr10	35520000	35530000	chr10	35760000	35770000		chr10	89630000	89640000	chr10	89710000	89720000		chr10	89150000	89160000	chr10	89470000	89480000		chr10	64950000	64960000	chr10	65030000	65040000		chr10	99020000	99030000	chr10	99100000	99110000		chr10	61380000	61390000	chr10	61650000	61660000		chr10	71720000	71730000	chr10	71800000	71810000
	chr10	35530000	35540000	chr10	35810000	35820000		chr10	89610000	89620000	chr10	90310000	90320000		chr10	29420000	29430000	chr10	29590000	29600000		chr10	119620000	119630000	chr10	119880000	119890000		chr10	6330000	6340000	chr10	6440000	6450000		chr10	69830000	69840000	chr10	70100000	70110000		chr10	88690000	88700000	chr10	88850000	88860000
	chr10	35520000	35530000	chr10	35600000	35610000		chr10	89620000	89630000	chr10	89870000	89880000		chr10	31870000	31880000	chr10	32050000	32060000		chr10	50180000	50190000	chr10	50390000	50400000		chr10	61460000	61470000	chr10	61550000	61560000		chr10	74130000	74140000	chr10	74400000	74410000		chr10	79220000	79230000	chr10	79390000	79400000
	chr10	35520000	35530000	chr10	35710000	35720000		chr10	89540000	89550000	chr10	89860000	89870000		chr10	31770000	31780000	chr10	32090000	32100000		chr10	69690000	69700000	chr10	70090000	70100000		chr10	86180000	86190000	chr10	86260000	86270000		chr10	93900000	93910000	chr10	94170000	94180000		chr10	44060000	44070000	chr10	44140000	44150000
	chr10	134940000	134950000	chr10	135130000	135140000		chr10	89620000	89630000	chr10	90140000	90150000		chr10	42610000	42620000	chr10	42860000	42870000		chr10	6710000	6720000	chr10	6960000	6970000		chr10	61690000	61700000	chr10	61780000	61790000		chr10	104070000	104080000	chr10	104340000	104350000		chr10	22510000	22520000	chr10	22710000	22720000
	chr10	134940000	134950000	chr10	135090000	135100000		chr10	74650000	74660000	chr10	74910000	74920000		chr10	42620000	42630000	chr10	42920000	42930000		chr10	3460000	3470000	chr10	3810000	3820000		chr10	126440000	126450000	chr10	126520000	126530000		chr10	113920000	113930000	chr10	114190000	114200000		chr10	31070000	31080000	chr10	31350000	31360000
	chr10	73140000	73150000	chr10	73570000	73580000		chr10	74650000	74660000	chr10	74960000	74970000		chr10	42620000	42630000	chr10	42760000	42770000		chr10	65110000	65120000	chr10	65380000	65390000		chr10	9250000	9260000	chr10	9340000	9350000		chr10	115430000	115440000	chr10	115700000	115710000		chr10	120810000	120820000	chr10	120920000	120930000
	chr10	73150000	73160000	chr10	73320000	73330000		chr10	74650000	74660000	chr10	74740000	74750000		chr10	63030000	63040000	chr10	63490000	63500000		chr10	12300000	12310000	chr10	12450000	12460000		chr10	103230000	103240000	chr10	103310000	103320000		chr10	118970000	118980000	chr10	119240000	119250000		chr10	134460000	134470000	chr10	134600000	134610000
	chr10	73150000	73160000	chr10	73450000	73460000		chr10	74630000	74640000	chr10	74820000	74830000		chr10	63110000	63120000	chr10	63460000	63470000		chr10	74130000	74140000	chr10	74720000	74730000		chr10	48560000	48570000	chr10	48650000	48660000		chr10	125750000	125760000	chr10	126020000	126030000		chr10	86010000	86020000	chr10	86100000	86110000
	chr10	122180000	122190000	chr10	122500000	122510000		chr10	111640000	111650000	chr10	112040000	112050000		chr10	63060000	63070000	chr10	63430000	63440000		chr10	120010000	120020000	chr10	120210000	120220000		chr10	99400000	99410000	chr10	99490000	99500000		chr10	3280000	3290000	chr10	3560000	3570000		chr10	76420000	76430000	chr10	76690000	76700000
	chr10	101380000	101390000	chr10	101460000	101470000		chr10	111640000	111650000	chr10	111890000	111900000		chr10	63110000	63120000	chr10	63300000	63310000		chr10	70410000	70420000	chr10	70650000	70660000		chr10	101690000	101700000	chr10	101800000	101810000		chr10	3710000	3720000	chr10	3990000	4000000		chr10	74120000	74130000	chr10	74520000	74530000
	chr10	71980000	71990000	chr10	72120000	72130000		chr10	66210000	66220000	chr10	66430000	66440000		chr10	63030000	63040000	chr10	63640000	63650000		chr10	23510000	23520000	chr10	23810000	23820000		chr10	69740000	69750000	chr10	69820000	69830000		chr10	33800000	33810000	chr10	34080000	34090000		chr10	15470000	15480000	chr10	15700000	15710000
	chr10	116320000	116330000	chr10	116440000	116450000		chr10	43760000	43770000	chr10	43870000	43880000		chr10	63150000	63160000	chr10	63620000	63630000		chr10	114340000	114350000	chr10	114490000	114500000		chr10	121050000	121060000	chr10	121180000	121190000		chr10	6870000	6880000	chr10	7160000	7170000		chr10	7240000	7250000	chr10	7450000	7460000
	chr10	116300000	116310000	chr10	116580000	116590000		chr10	43780000	43790000	chr10	43950000	43960000		chr10	4100000	4110000	chr10	4810000	4820000		chr10	63140000	63150000	chr10	63450000	63460000		chr10	120970000	120980000	chr10	121050000	121060000		chr10	32150000	32160000	chr10	32440000	32450000		chr10	35600000	35610000	chr10	35860000	35870000
	chr10	95580000	95590000	chr10	96300000	96310000		chr10	4550000	4560000	chr10	4690000	4700000		chr10	10830000	10840000	chr10	10950000	10960000		chr10	5840000	5850000	chr10	6010000	6020000		chr10	120790000	120800000	chr10	120870000	120880000		chr10	103530000	103540000	chr10	103820000	103830000		chr10	73930000	73940000	chr10	74100000	74110000
	chr10	95580000	95590000	chr10	96070000	96080000		chr10	4550000	4560000	chr10	4800000	4810000		chr10	10850000	10860000	chr10	11060000	11070000		chr10	104850000	104860000	chr10	105140000	105150000		chr10	5810000	5820000	chr10	5920000	5930000		chr10	21160000	21170000	chr10	21460000	21470000		chr10	123780000	123790000	chr10	123870000	123880000
	chr10	7570000	7580000	chr10	7900000	7910000		chr10	134730000	134740000	chr10	134980000	134990000		chr10	62570000	62580000	chr10	63040000	63050000		chr10	71980000	71990000	chr10	72190000	72200000		chr10	121220000	121230000	chr10	121300000	121310000		chr10	34500000	34510000	chr10	34800000	34810000		chr10	31070000	31080000	chr10	31290000	31300000
	chr10	7560000	7570000	chr10	7720000	7730000		chr10	134750000	134760000	chr10	135120000	135130000		chr10	62570000	62580000	chr10	63490000	63500000		chr10	32330000	32340000	chr10	32530000	32540000		chr10	88560000	88570000	chr10	88640000	88650000		chr10	3400000	3410000	chr10	3710000	3720000		chr10	95260000	95270000	chr10	95440000	95450000
	chr10	7560000	7570000	chr10	9350000	9360000		chr10	62640000	62650000	chr10	62720000	62730000		chr10	62570000	62580000	chr10	62720000	62730000		chr10	124890000	124900000	chr10	125100000	125110000		chr10	70990000	71000000	chr10	71080000	71090000		chr10	103590000	103600000	chr10	103900000	103910000		chr10	45860000	45870000	chr10	45940000	45950000
	chr10	74380000	74390000	chr10	74580000	74590000		chr10	62570000	62580000	chr10	63040000	63050000		chr10	62590000	62600000	chr10	62790000	62800000		chr10	64350000	64360000	chr10	64680000	64690000		chr10	24930000	24940000	chr10	25010000	25020000		chr10	111730000	111740000	chr10	112040000	112050000		chr10	55590000	55600000	chr10	56160000	56170000
	chr10	23720000	23730000	chr10	23810000	23820000		chr10	62580000	62590000	chr10	63340000	63350000		chr10	62560000	62570000	chr10	63190000	63200000		chr10	127670000	127680000	chr10	128030000	128040000		chr10	90800000	90810000	chr10	90900000	90910000		chr10	3850000	3860000	chr10	4170000	4180000		chr10	27840000	27850000	chr10	28020000	28030000
	chr10	80600000	80610000	chr10	80950000	80960000		chr10	62590000	62600000	chr10	63210000	63220000		chr10	62570000	62580000	chr10	63350000	63360000		chr10	104420000	104430000	chr10	104830000	104840000		chr10	75170000	75180000	chr10	75250000	75260000		chr10	31280000	31290000	chr10	31600000	31610000		chr10	104450000	104460000	chr10	104650000	104660000
	chr10	80550000	80560000	chr10	80720000	80730000		chr10	62570000	62580000	chr10	63490000	63500000		chr10	62580000	62590000	chr10	63570000	63580000		chr10	22860000	22870000	chr10	23180000	23190000		chr10	115760000	115770000	chr10	115850000	115860000		chr10	34590000	34600000	chr10	34920000	34930000		chr10	21790000	21800000	chr10	21870000	21880000
	chr10	80600000	80610000	chr10	80830000	80840000		chr10	62580000	62590000	chr10	63410000	63420000		chr10	62570000	62580000	chr10	63640000	63650000		chr10	5980000	5990000	chr10	6130000	6140000		chr10	86020000	86030000	chr10	86100000	86110000		chr10	69580000	69590000	chr10	69910000	69920000		chr10	52830000	52840000	chr10	53060000	53070000
	chr10	130830000	130840000	chr10	131130000	131140000		chr10	62580000	62590000	chr10	62870000	62880000		chr10	62570000	62580000	chr10	62940000	62950000		chr10	110570000	110580000	chr10	111190000	111200000		chr10	105720000	105730000	chr10	105870000	105880000		chr10	79140000	79150000	chr10	79470000	79480000		chr10	118970000	118980000	chr10	119230000	119240000
	chr10	130830000	130840000	chr10	131750000	131760000		chr10	75520000	75530000	chr10	75870000	75880000		chr10	72810000	72820000	chr10	72940000	72950000		chr10	69760000	69770000	chr10	69980000	69990000		chr10	94460000	94470000	chr10	94540000	94550000		chr10	23450000	23460000	chr10	23790000	23800000		chr10	20100000	20110000	chr10	20280000	20290000
	chr10	130820000	130830000	chr10	131530000	131540000		chr10	75540000	75550000	chr10	75700000	75710000		chr10	72830000	72840000	chr10	73040000	73050000		chr10	22790000	22800000	chr10	23280000	23290000		chr10	63260000	63270000	chr10	63340000	63350000		chr10	73750000	73760000	chr10	74090000	74100000		chr10	95750000	95760000	chr10	95840000	95850000
	chr10	130830000	130840000	chr10	131260000	131270000		chr10	77970000	77980000	chr10	78300000	78310000		chr10	100090000	100100000	chr10	100420000	100430000		chr10	10660000	10670000	chr10	10980000	10990000		chr10	6620000	6630000	chr10	6700000	6710000		chr10	89810000	89820000	chr10	90150000	90160000		chr10	115890000	115900000	chr10	115980000	115990000
	chr10	11560000	11570000	chr10	11790000	11800000		chr10	77980000	77990000	chr10	78760000	78770000		chr10	100090000	100100000	chr10	100170000	100180000		chr10	127550000	127560000	chr10	127880000	127890000		chr10	115720000	115730000	chr10	115860000	115870000		chr10	93050000	93060000	chr10	93390000	93400000		chr10	45170000	45180000	chr10	45330000	45340000
	chr10	55590000	55600000	chr10	56160000	56170000		chr10	79960000	79970000	chr10	80070000	80080000		chr10	45570000	45580000	chr10	46140000	46150000		chr10	23020000	23030000	chr10	23270000	23280000		chr10	32130000	32140000	chr10	32210000	32220000		chr10	6090000	6100000	chr10	6440000	6450000		chr10	35760000	35770000	chr10	35840000	35850000
	chr10	55610000	55620000	chr10	55870000	55880000		chr10	79970000	79980000	chr10	80330000	80340000		chr10	45580000	45590000	chr10	45910000	45920000		chr10	220000	230000	chr10	520000	530000		chr10	3290000	3300000	chr10	3400000	3410000		chr10	21790000	21800000	chr10	22140000	22150000		chr10	55360000	55370000	chr10	56160000	56170000
	chr10	47070000	47080000	chr10	47600000	47610000		chr10	79980000	79990000	chr10	80270000	80280000		chr10	5720000	5730000	chr10	5910000	5920000		chr10	126150000	126160000	chr10	126430000	126440000		chr10	73660000	73670000	chr10	73740000	73750000		chr10	70300000	70310000	chr10	70650000	70660000		chr10	97380000	97390000	chr10	97620000	97630000
	chr10	47090000	47100000	chr10	47650000	47660000		chr10	79970000	79980000	chr10	80410000	80420000		chr10	5720000	5730000	chr10	5840000	5850000		chr10	107590000	107600000	chr10	107920000	107930000		chr10	38150000	38160000	chr10	38260000	38270000		chr10	98430000	98440000	chr10	98780000	98790000		chr10	114970000	114980000	chr10	115140000	115150000
	chr10	102820000	102830000	chr10	103330000	103340000		chr10	79950000	79960000	chr10	80190000	80200000		chr10	5680000	5690000	chr10	5790000	5800000		chr10	12050000	12060000	chr10	12170000	12180000		chr10	12780000	12790000	chr10	12860000	12870000		chr10	3510000	3520000	chr10	3870000	3880000		chr10	101950000	101960000	chr10	102030000	102040000
	chr10	102810000	102820000	chr10	102890000	102900000		chr10	79990000	80000000	chr10	80950000	80960000		chr10	48430000	48440000	chr10	48650000	48660000		chr10	93730000	93740000	chr10	94200000	94210000		chr10	119300000	119310000	chr10	119440000	119450000		chr10	14630000	14640000	chr10	14990000	15000000		chr10	7480000	7490000	chr10	7560000	7570000
	chr10	43470000	43480000	chr10	43570000	43580000		chr10	31990000	32000000	chr10	32100000	32110000		chr10	55890000	55900000	chr10	56160000	56170000		chr10	16870000	16880000	chr10	17180000	17190000		chr10	102430000	102440000	chr10	102630000	102640000		chr10	3800000	3810000	chr10	4170000	4180000		chr10	79810000	79820000	chr10	80020000	80030000
	chr10	54640000	54650000	chr10	54980000	54990000		chr10	123070000	123080000	chr10	123340000	123350000		chr10	96720000	96730000	chr10	97350000	97360000		chr10	31010000	31020000	chr10	31960000	31970000		chr10	115620000	115630000	chr10	115850000	115860000		chr10	76400000	76410000	chr10	76770000	76780000		chr10	81640000	81650000	chr10	81730000	81740000
	chr10	120220000	120230000	chr10	120300000	120310000		chr10	122990000	123000000	chr10	123630000	123640000		chr10	96720000	96730000	chr10	96850000	96860000		chr10	29980000	29990000	chr10	30280000	30290000		chr10	115460000	115470000	chr10	115540000	115550000		chr10	12370000	12380000	chr10	12750000	12760000		chr10	43100000	43110000	chr10	43290000	43300000
	chr10	121690000	121700000	chr10	122100000	122110000		chr10	123050000	123060000	chr10	123490000	123500000		chr10	96720000	96730000	chr10	96930000	96940000		chr10	131680000	131690000	chr10	131970000	131980000		chr10	49420000	49430000	chr10	49500000	49510000		chr10	92770000	92780000	chr10	93150000	93160000		chr10	9250000	9260000	chr10	9330000	9340000
	chr10	95310000	95320000	chr10	95560000	95570000		chr10	123060000	123070000	chr10	123170000	123180000		chr10	96710000	96720000	chr10	97100000	97110000		chr10	20440000	20450000	chr10	20750000	20760000		chr10	80960000	80970000	chr10	81040000	81050000		chr10	125750000	125760000	chr10	126130000	126140000		chr10	80120000	80130000	chr10	80410000	80420000
	chr10	95300000	95310000	chr10	95430000	95440000		chr10	120090000	120100000	chr10	120180000	120190000		chr10	126510000	126520000	chr10	127420000	127430000		chr10	35920000	35930000	chr10	36290000	36300000		chr10	72960000	72970000	chr10	73040000	73050000		chr10	8090000	8100000	chr10	8480000	8490000		chr10	122180000	122190000	chr10	122490000	122500000
	chr10	117450000	117460000	chr10	118140000	118150000		chr10	120060000	120070000	chr10	120300000	120310000		chr10	126490000	126500000	chr10	126600000	126610000		chr10	119660000	119670000	chr10	119990000	120000000		chr10	116310000	116320000	chr10	116400000	116410000		chr10	76590000	76600000	chr10	76980000	76990000		chr10	65070000	65080000	chr10	65370000	65380000
	chr10	117450000	117460000	chr10	118030000	118040000		chr10	114480000	114490000	chr10	114560000	114570000		chr10	126440000	126450000	chr10	126520000	126530000		chr10	91550000	91560000	chr10	92430000	92440000		chr10	58080000	58090000	chr10	58160000	58170000		chr10	116150000	116160000	chr10	116540000	116550000		chr10	69750000	69760000	chr10	69930000	69940000
	chr10	4430000	4440000	chr10	4690000	4700000		chr10	114430000	114440000	chr10	114940000	114950000		chr10	126470000	126480000	chr10	126810000	126820000		chr10	79050000	79060000	chr10	79420000	79430000		chr10	28970000	28980000	chr10	29190000	29200000		chr10	70990000	71000000	chr10	71390000	71400000		chr10	12050000	12060000	chr10	12130000	12140000
	chr10	4390000	4400000	chr10	4690000	4700000		chr10	114440000	114450000	chr10	115140000	115150000		chr10	80710000	80720000	chr10	81080000	81090000		chr10	63190000	63200000	chr10	63480000	63490000		chr10	11650000	11660000	chr10	11740000	11750000		chr10	81310000	81320000	chr10	81710000	81720000		chr10	25280000	25290000	chr10	25370000	25380000
	chr10	4410000	4420000	chr10	4790000	4800000		chr10	114480000	114490000	chr10	114700000	114710000		chr10	80730000	80740000	chr10	80820000	80830000		chr10	21570000	21580000	chr10	21860000	21870000		chr10	4510000	4520000	chr10	4680000	4690000		chr10	8920000	8930000	chr10	9330000	9340000		chr10	79310000	79320000	chr10	79390000	79400000
	chr10	3500000	3510000	chr10	3950000	3960000		chr10	114470000	114480000	chr10	114780000	114790000		chr10	80590000	80600000	chr10	80800000	80810000		chr10	132790000	132800000	chr10	133010000	133020000		chr10	28720000	28730000	chr10	28810000	28820000		chr10	122830000	122840000	chr10	123240000	123250000		chr10	43260000	43270000	chr10	43340000	43350000
	chr10	3510000	3520000	chr10	4690000	4700000		chr10	114470000	114480000	chr10	114880000	114890000		chr10	80720000	80730000	chr10	80950000	80960000		chr10	112840000	112850000	chr10	113080000	113090000		chr10	126760000	126770000	chr10	126840000	126850000		chr10	103920000	103930000	chr10	104340000	104350000		chr10	8170000	8180000	chr10	8360000	8370000
	chr10	3520000	3530000	chr10	3810000	3820000		chr10	89890000	89900000	chr10	90020000	90030000		chr10	80610000	80620000	chr10	80950000	80960000		chr10	72750000	72760000	chr10	73030000	73040000		chr10	124210000	124220000	chr10	124310000	124320000		chr10	105460000	105470000	chr10	105880000	105890000		chr10	93600000	93610000	chr10	93770000	93780000
	chr10	3580000	3590000	chr10	3810000	3820000		chr10	89880000	89890000	chr10	90300000	90310000		chr10	34030000	34040000	chr10	34910000	34920000		chr10	132640000	132650000	chr10	133090000	133100000		chr10	101320000	101330000	chr10	101470000	101480000		chr10	31340000	31350000	chr10	31770000	31780000		chr10	87990000	88000000	chr10	88070000	88080000
	chr10	3510000	3520000	chr10	3660000	3670000		chr10	89940000	89950000	chr10	90300000	90310000		chr10	97910000	97920000	chr10	98060000	98070000		chr10	130320000	130330000	chr10	130530000	130540000		chr10	74150000	74160000	chr10	74240000	74250000		chr10	76340000	76350000	chr10	76770000	76780000		chr10	80970000	80980000	chr10	81050000	81060000
[truncated: 67,893 more rows]
[truncated: 12 more columns]
