# Supplementary material for: Subtype-associated epigenomic landscape and 3D genome structure in bladder cancer
Source: Genome Biol. 2021 Apr 15;22:105. doi: 10.1186/s13059-021-02325-y (PMC8048365; doi:10.1186/s13059-021-02325-y)
Supplement: Supplementary file 14 — Additional file 14: Table S13. Luminal-specific and Basal-specific loops. [file 13059_2021_2325_MOESM14_ESM.xlsx]

## Sheet: Table S13-Luminal & Basal Loops
Supplementary Table S13: Luminal-specific and Basal-specific loops
	Luminal-specific Loops							Basal-specific Loops
	Loop Anchor 1			Loop Anchor 2				Loop Anchor 1			Loop Anchor 2
	chr	start	stop	chr	start	stop		chr	start	stop	chr	start	stop
	chr10	77900000	77910000	chr10	78060000	78070000		chr10	21360000	21370000	chr10	21770000	21780000
	chr10	119290000	119300000	chr10	119610000	119620000		chr10	50190000	50200000	chr10	50580000	50590000
	chr10	45160000	45170000	chr10	45340000	45350000		chr10	59930000	59940000	chr10	60160000	60170000
	chr10	33620000	33630000	chr10	33900000	33910000		chr10	74120000	74130000	chr10	74790000	74800000
	chr10	111670000	111680000	chr10	111870000	111880000		chr10	74130000	74140000	chr10	74700000	74710000
	chr10	5150000	5160000	chr10	5460000	5470000		chr10	122710000	122720000	chr10	123420000	123430000
	chr10	111780000	111790000	chr10	112040000	112050000		chr10	37720000	37730000	chr10	37930000	37940000
	chr10	77660000	77670000	chr10	78060000	78070000		chr11	68880000	68890000	chr11	69330000	69340000
	chr10	6950000	6960000	chr10	7100000	7110000		chr11	65390000	65400000	chr11	65740000	65750000
	chr10	78120000	78130000	chr10	78290000	78300000		chr11	35630000	35640000	chr11	36260000	36270000
	chr10	37400000	37410000	chr10	37770000	37780000		chr11	62170000	62180000	chr11	62380000	62390000
	chr10	91180000	91190000	chr10	91390000	91400000		chr11	26780000	26790000	chr11	26990000	27000000
	chr10	62200000	62210000	chr10	62540000	62550000		chr11	70050000	70060000	chr11	70230000	70240000
	chr10	112500000	112510000	chr10	112740000	112750000		chr11	77470000	77480000	chr11	77740000	77750000
	chr10	8100000	8110000	chr10	9250000	9260000		chr12	78950000	78960000	chr12	79730000	79740000
	chr10	8110000	8120000	chr10	8910000	8920000		chr12	31560000	31570000	chr12	32460000	32470000
	chr10	54760000	54770000	chr10	54950000	54960000		chr12	22990000	23000000	chr12	23330000	23340000
	chr10	122700000	122710000	chr10	123220000	123230000		chr12	32100000	32110000	chr12	32450000	32460000
	chr10	32140000	32150000	chr10	32470000	32480000		chr12	89940000	89950000	chr12	91330000	91340000
	chr10	121180000	121190000	chr10	121290000	121300000		chr12	27100000	27110000	chr12	27460000	27470000
	chr10	130060000	130070000	chr10	130300000	130310000		chr12	19910000	19920000	chr12	20130000	20140000
	chr10	35630000	35640000	chr10	35870000	35880000		chr12	101810000	101820000	chr12	102010000	102020000
	chr10	134170000	134180000	chr10	134440000	134450000		chr12	30660000	30670000	chr12	30960000	30970000
	chr10	69290000	69300000	chr10	69530000	69540000		chr12	92240000	92250000	chr12	92530000	92540000
	chr10	62610000	62620000	chr10	62880000	62890000		chr12	94090000	94100000	chr12	94490000	94500000
	chr10	50530000	50540000	chr10	50720000	50730000		chr12	34190000	34200000	chr12	34490000	34500000
	chr10	80040000	80050000	chr10	80410000	80420000		chr12	46760000	46770000	chr12	47410000	47420000
	chr10	115070000	115080000	chr10	115270000	115280000		chr13	36860000	36870000	chr13	37400000	37410000
	chr10	122870000	122880000	chr10	123150000	123160000		chr13	46460000	46470000	chr13	46700000	46710000
	chr10	96720000	96730000	chr10	96910000	96920000		chr13	46500000	46510000	chr13	46710000	46720000
	chr10	100640000	100650000	chr10	101000000	101010000		chr13	73640000	73650000	chr13	74260000	74270000
	chr10	44970000	44980000	chr10	45350000	45360000		chr13	34370000	34380000	chr13	34650000	34660000
	chr10	68750000	68760000	chr10	69280000	69290000		chr14	61190000	61200000	chr14	61660000	61670000
	chr10	98410000	98420000	chr10	98870000	98880000		chr14	103450000	103460000	chr14	103760000	103770000
	chr10	32300000	32310000	chr10	32620000	32630000		chr14	55020000	55030000	chr14	55330000	55340000
	chr10	69110000	69120000	chr10	69260000	69270000		chr14	61760000	61770000	chr14	62200000	62210000
	chr10	43660000	43670000	chr10	43950000	43960000		chr14	68410000	68420000	chr14	68800000	68810000
	chr10	8420000	8430000	chr10	8730000	8740000		chr14	69590000	69600000	chr14	69860000	69870000
	chr10	8910000	8920000	chr10	9340000	9350000		chr14	35900000	35910000	chr14	36200000	36210000
	chr10	60540000	60550000	chr10	60760000	60770000		chr14	35560000	35570000	chr14	35880000	35890000
	chr10	63070000	63080000	chr10	63490000	63500000		chr15	68540000	68550000	chr15	68800000	68810000
	chr10	4010000	4020000	chr10	4170000	4180000		chr15	81300000	81310000	chr15	81560000	81570000
	chr10	35520000	35530000	chr10	35710000	35720000		chr15	69780000	69790000	chr15	70750000	70760000
	chr10	47070000	47080000	chr10	47600000	47610000		chr15	36800000	36810000	chr15	37030000	37040000
	chr10	23590000	23600000	chr10	23920000	23930000		chr15	27310000	27320000	chr15	27490000	27500000
	chr10	96400000	96410000	chr10	96660000	96670000		chr15	24870000	24880000	chr15	25070000	25080000
	chr10	16350000	16360000	chr10	16600000	16610000		chr15	96530000	96540000	chr15	96860000	96870000
	chr10	128000000	128010000	chr10	128200000	128210000		chr15	70870000	70880000	chr15	71100000	71110000
	chr10	6880000	6890000	chr10	7450000	7460000		chr15	75220000	75230000	chr15	75490000	75500000
	chr10	21160000	21170000	chr10	21540000	21550000		chr15	72880000	72890000	chr15	73370000	73380000
	chr10	2890000	2900000	chr10	3070000	3080000		chr16	14730000	14740000	chr16	15160000	15170000
	chr10	77870000	77880000	chr10	78000000	78010000		chr16	66430000	66440000	chr16	66890000	66900000
	chr10	28940000	28950000	chr10	29470000	29480000		chr17	13490000	13500000	chr17	14200000	14210000
	chr10	34670000	34680000	chr10	34780000	34790000		chr17	67270000	67280000	chr17	67490000	67500000
	chr10	130960000	130970000	chr10	131100000	131110000		chr17	32870000	32880000	chr17	33280000	33290000
	chr10	29540000	29550000	chr10	29660000	29670000		chr17	80610000	80620000	chr17	80830000	80840000
	chr10	78500000	78510000	chr10	78750000	78760000		chr17	64710000	64720000	chr17	65150000	65160000
	chr10	49870000	49880000	chr10	50090000	50100000		chr17	27290000	27300000	chr17	27540000	27550000
	chr10	55590000	55600000	chr10	55960000	55970000		chr17	55210000	55220000	chr17	55670000	55680000
	chr10	89620000	89630000	chr10	90030000	90040000		chr18	52220000	52230000	chr18	52660000	52670000
	chr10	65620000	65630000	chr10	65790000	65800000		chr18	46540000	46550000	chr18	46970000	46980000
	chr10	53360000	53370000	chr10	53570000	53580000		chr18	44850000	44860000	chr18	45260000	45270000
	chr10	97130000	97140000	chr10	97410000	97420000		chr18	53080000	53090000	chr18	53380000	53390000
	chr10	450000	460000	chr10	840000	850000		chr18	29140000	29150000	chr18	29540000	29550000
	chr10	77840000	77850000	chr10	78050000	78060000		chr19	39020000	39030000	chr19	39320000	39330000
	chr10	53310000	53320000	chr10	53660000	53670000		chr19	9430000	9440000	chr19	9910000	9920000
	chr10	69040000	69050000	chr10	69270000	69280000		chr19	44360000	44370000	chr19	44990000	45000000
	chr10	63110000	63120000	chr10	63480000	63490000		chr19	55890000	55900000	chr19	55980000	55990000
	chr10	97450000	97460000	chr10	97670000	97680000		chr19	38720000	38730000	chr19	38950000	38960000
	chr10	500000	510000	chr10	830000	840000		chr19	3820000	3830000	chr19	4210000	4220000
	chr10	56230000	56240000	chr10	56410000	56420000		chr19	57990000	58000000	chr19	58260000	58270000
	chr10	7100000	7110000	chr10	7470000	7480000		chr19	36490000	36500000	chr19	36650000	36660000
	chr10	128300000	128310000	chr10	128520000	128530000		chr19	14310000	14320000	chr19	14590000	14600000
	chr10	55360000	55370000	chr10	55450000	55460000		chr19	56940000	56950000	chr19	57170000	57180000
	chr10	7160000	7170000	chr10	7290000	7300000		chr19	57380000	57390000	chr19	57580000	57590000
	chr10	117010000	117020000	chr10	117170000	117180000		chr19	57250000	57260000	chr19	57470000	57480000
	chr10	45010000	45020000	chr10	45180000	45190000		chr19	24110000	24120000	chr19	24340000	24350000
	chr10	16350000	16360000	chr10	16540000	16550000		chr19	3230000	3240000	chr19	3480000	3490000
	chr10	50840000	50850000	chr10	51040000	51050000		chr19	20910000	20920000	chr19	21170000	21180000
	chr10	121970000	121980000	chr10	122170000	122180000		chr1	32040000	32050000	chr1	32230000	32240000
	chr10	7230000	7240000	chr10	7450000	7460000		chr1	245330000	245340000	chr1	245620000	245630000
	chr10	114970000	114980000	chr10	115190000	115200000		chr1	227940000	227950000	chr1	228270000	228280000
	chr10	12480000	12490000	chr10	12740000	12750000		chr1	234740000	234750000	chr1	235170000	235180000
	chr10	44170000	44180000	chr10	44430000	44440000		chr1	29560000	29570000	chr1	31180000	31190000
	chr10	92090000	92100000	chr10	92370000	92380000		chr1	206900000	206910000	chr1	207670000	207680000
	chr10	69670000	69680000	chr10	69960000	69970000		chr1	24520000	24530000	chr1	24830000	24840000
	chr10	3830000	3840000	chr10	4140000	4150000		chr1	113260000	113270000	chr1	113490000	113500000
	chr11	108070000	108080000	chr11	108510000	108520000		chr1	7440000	7450000	chr1	7690000	7700000
	chr11	71520000	71530000	chr11	72130000	72140000		chr1	233570000	233580000	chr1	233840000	233850000
	chr11	98310000	98320000	chr11	98870000	98880000		chr1	152530000	152540000	chr1	152830000	152840000
	chr11	95660000	95670000	chr11	96140000	96150000		chr20	10650000	10660000	chr20	11520000	11530000
	chr11	7140000	7150000	chr11	7700000	7710000		chr20	55190000	55200000	chr20	55610000	55620000
	chr11	34010000	34020000	chr11	34370000	34380000		chr20	32870000	32880000	chr20	33340000	33350000
	chr11	7830000	7840000	chr11	8000000	8010000		chr20	24980000	24990000	chr20	25370000	25380000
	chr11	62370000	62380000	chr11	62630000	62640000		chr20	1870000	1880000	chr20	2150000	2160000
	chr11	3470000	3480000	chr11	3820000	3830000		chr21	28240000	28250000	chr21	28640000	28650000
	chr11	120590000	120600000	chr11	120790000	120800000		chr2	217920000	217930000	chr2	218370000	218380000
	chr11	85360000	85370000	chr11	85650000	85660000		chr2	57280000	57290000	chr2	57720000	57730000
	chr11	130470000	130480000	chr11	130730000	130740000		chr2	158470000	158480000	chr2	158870000	158880000
	chr11	57720000	57730000	chr11	57940000	57950000		chr2	27930000	27940000	chr2	28500000	28510000
	chr11	36590000	36600000	chr11	36770000	36780000		chr2	174250000	174260000	chr2	175200000	175210000
	chr11	108180000	108190000	chr11	108370000	108380000		chr2	153780000	153790000	chr2	154360000	154370000
	chr11	109880000	109890000	chr11	110060000	110070000		chr2	20150000	20160000	chr2	20370000	20380000
	chr11	86650000	86660000	chr11	86890000	86900000		chr2	169200000	169210000	chr2	169730000	169740000
	chr11	56760000	56770000	chr11	57000000	57010000		chr2	204490000	204500000	chr2	204770000	204780000
	chr11	63230000	63240000	chr11	63480000	63490000		chr2	200840000	200850000	chr2	201430000	201440000
	chr11	110850000	110860000	chr11	111100000	111110000		chr2	160940000	160950000	chr2	161910000	161920000
	chr11	120100000	120110000	chr11	120290000	120300000		chr2	209330000	209340000	chr2	209710000	209720000
	chr11	63520000	63530000	chr11	63910000	63920000		chr2	226750000	226760000	chr2	227140000	227150000
	chr11	550000	560000	chr11	800000	810000		chr2	188890000	188900000	chr2	189140000	189150000
	chr11	23130000	23140000	chr11	23450000	23460000		chr2	210200000	210210000	chr2	210810000	210820000
	chr11	23150000	23160000	chr11	23370000	23380000		chr3	15300000	15310000	chr3	15580000	15590000
	chr11	23140000	23150000	chr11	23560000	23570000		chr3	195740000	195750000	chr3	196240000	196250000
	chr11	15010000	15020000	chr11	15230000	15240000		chr3	52030000	52040000	chr3	52240000	52250000
	chr11	34940000	34950000	chr11	35310000	35320000		chr3	49850000	49860000	chr3	50120000	50130000
	chr11	34940000	34950000	chr11	35140000	35150000		chr3	145790000	145800000	chr3	146040000	146050000
	chr11	33870000	33880000	chr11	34370000	34380000		chr3	11610000	11620000	chr3	11840000	11850000
	chr11	31890000	31900000	chr11	32190000	32200000		chr3	193390000	193400000	chr3	193850000	193860000
	chr11	12530000	12540000	chr11	12890000	12900000		chr3	12630000	12640000	chr3	12870000	12880000
	chr11	94260000	94270000	chr11	94620000	94630000		chr3	41720000	41730000	chr3	41910000	41920000
	chr11	18830000	18840000	chr11	19050000	19060000		chr3	126690000	126700000	chr3	126780000	126790000
	chr11	96200000	96210000	chr11	96550000	96560000		chr3	186590000	186600000	chr3	186890000	186900000
	chr11	94890000	94900000	chr11	95190000	95200000		chr3	71170000	71180000	chr3	71630000	71640000
	chr11	94900000	94910000	chr11	95150000	95160000		chr4	168210000	168220000	chr4	168530000	168540000
	chr11	110870000	110880000	chr11	111090000	111100000		chr4	153760000	153770000	chr4	154230000	154240000
	chr11	87170000	87180000	chr11	87470000	87480000		chr4	10550000	10560000	chr4	12630000	12640000
	chr11	82020000	82030000	chr11	82230000	82240000		chr4	129100000	129110000	chr4	129770000	129780000
	chr11	81350000	81360000	chr11	81440000	81450000		chr4	91240000	91250000	chr4	91320000	91330000
	chr11	7150000	7160000	chr11	7360000	7370000		chr4	151200000	151210000	chr4	151680000	151690000
	chr11	23970000	23980000	chr11	24140000	24150000		chr4	126230000	126240000	chr4	126460000	126470000
	chr11	130550000	130560000	chr11	130720000	130730000		chr4	3100000	3110000	chr4	3340000	3350000
	chr11	110740000	110750000	chr11	111100000	111110000		chr4	114310000	114320000	chr4	114710000	114720000
	chr11	57020000	57030000	chr11	57110000	57120000		chr5	73960000	73970000	chr5	74560000	74570000
	chr11	23140000	23150000	chr11	23480000	23490000		chr5	54530000	54540000	chr5	54970000	54980000
	chr11	31970000	31980000	chr11	32190000	32200000		chr5	141530000	141540000	chr5	142060000	142070000
	chr11	133790000	133800000	chr11	133950000	133960000		chr5	73390000	73400000	chr5	73680000	73690000
	chr11	89010000	89020000	chr11	89340000	89350000		chr5	142390000	142400000	chr5	142740000	142750000
	chr11	84170000	84180000	chr11	84260000	84270000		chr6	44610000	44620000	chr6	45380000	45390000
	chr11	30030000	30040000	chr11	30140000	30150000		chr6	129120000	129130000	chr6	129680000	129690000
	chr11	108210000	108220000	chr11	108340000	108350000		chr6	70560000	70570000	chr6	70820000	70830000
	chr11	71520000	71530000	chr11	71680000	71690000		chr6	43630000	43640000	chr6	43920000	43930000
	chr11	16150000	16160000	chr11	16320000	16330000		chr6	37340000	37350000	chr6	37520000	37530000
	chr11	102740000	102750000	chr11	102920000	102930000		chr6	142800000	142810000	chr6	143740000	143750000
	chr11	103810000	103820000	chr11	104020000	104030000		chr6	14210000	14220000	chr6	15490000	15500000
	chr11	9950000	9960000	chr11	10320000	10330000		chr6	9340000	9350000	chr6	9560000	9570000
	chr12	106110000	106120000	chr12	106400000	106410000		chr6	18590000	18600000	chr6	18910000	18920000
	chr12	23170000	23180000	chr12	23370000	23380000		chr6	54470000	54480000	chr6	54930000	54940000
	chr12	91970000	91980000	chr12	92170000	92180000		chr7	65530000	65540000	chr7	65960000	65970000
	chr12	94540000	94550000	chr12	94780000	94790000		chr7	106850000	106860000	chr7	107200000	107210000
	chr12	75910000	75920000	chr12	76330000	76340000		chr7	139870000	139880000	chr7	140140000	140150000
	chr12	94370000	94380000	chr12	94480000	94490000		chr7	148440000	148450000	chr7	148650000	148660000
	chr12	45550000	45560000	chr12	45900000	45910000		chr7	63670000	63680000	chr7	64060000	64070000
	chr12	94940000	94950000	chr12	95280000	95290000		chr7	106840000	106850000	chr7	107170000	107180000
	chr12	55120000	55130000	chr12	55530000	55540000		chr7	46400000	46410000	chr7	46610000	46620000
	chr12	92340000	92350000	chr12	92530000	92540000		chr7	82440000	82450000	chr7	82850000	82860000
	chr12	96210000	96220000	chr12	96370000	96380000		chr7	83060000	83070000	chr7	83530000	83540000
	chr12	94300000	94310000	chr12	94490000	94500000		chr8	71030000	71040000	chr8	71500000	71510000
	chr12	51820000	51830000	chr12	52030000	52040000		chr8	105330000	105340000	chr8	105500000	105510000
	chr12	29700000	29710000	chr12	29940000	29950000		chr8	42250000	42260000	chr8	42660000	42670000
	chr12	92200000	92210000	chr12	92440000	92450000		chr8	29200000	29210000	chr8	29630000	29640000
	chr12	98110000	98120000	chr12	98260000	98270000		chr8	108080000	108090000	chr8	108790000	108800000
	chr12	59980000	59990000	chr12	60180000	60190000		chr8	86350000	86360000	chr8	87090000	87100000
	chr12	60040000	60050000	chr12	60210000	60220000		chr8	73860000	73870000	chr8	74080000	74090000
	chr12	101890000	101900000	chr12	102090000	102100000		chr8	91020000	91030000	chr8	91530000	91540000
	chr12	87380000	87390000	chr12	87540000	87550000		chr9	111060000	111070000	chr9	111560000	111570000
	chr12	114770000	114780000	chr12	114890000	114900000		chr9	15240000	15250000	chr9	15600000	15610000
	chr12	98600000	98610000	chr12	98750000	98760000		chr9	37480000	37490000	chr9	37640000	37650000
	chr12	44450000	44460000	chr12	44670000	44680000		chr9	34900000	34910000	chr9	35260000	35270000
	chr12	87550000	87560000	chr12	87730000	87740000		chrX	14050000	14060000	chrX	15150000	15160000
	chr12	97960000	97970000	chr12	98100000	98110000		chrX	41660000	41670000	chrX	41950000	41960000
	chr12	97950000	97960000	chr12	98330000	98340000		chrX	23930000	23940000	chrX	24210000	24220000
	chr12	6420000	6430000	chr12	6640000	6650000		chr11	122450000	122460000	chr11	122900000	122910000
	chr12	63830000	63840000	chr12	64050000	64060000		chr12	112490000	112500000	chr12	112840000	112850000
	chr12	67750000	67760000	chr12	67950000	67960000		chr12	79810000	79820000	chr12	80200000	80210000
	chr12	82790000	82800000	chr12	83020000	83030000		chr14	29230000	29240000	chr14	29590000	29600000
	chr12	59840000	59850000	chr12	60040000	60050000		chr14	29220000	29230000	chr14	29640000	29650000
	chr12	59830000	59840000	chr12	59980000	59990000		chr17	79230000	79240000	chr17	79570000	79580000
	chr12	108480000	108490000	chr12	108880000	108890000		chr18	67800000	67810000	chr18	68100000	68110000
	chr12	102560000	102570000	chr12	103160000	103170000		chr22	32380000	32390000	chr22	32650000	32660000
	chr12	89960000	89970000	chr12	90400000	90410000		chr2	28160000	28170000	chr2	28610000	28620000
	chr12	70310000	70320000	chr12	70460000	70470000		chr2	120440000	120450000	chr2	120920000	120930000
	chr12	83090000	83100000	chr12	83330000	83340000		chr3	46130000	46140000	chr3	46310000	46320000
	chr12	48570000	48580000	chr12	48670000	48680000		chr7	43540000	43550000	chr7	43750000	43760000
	chr12	132530000	132540000	chr12	132620000	132630000		chr7	45190000	45200000	chr7	45840000	45850000
	chr12	58370000	58380000	chr12	58750000	58760000		chr8	108540000	108550000	chr8	108630000	108640000
	chr12	73180000	73190000	chr12	73270000	73280000		chr11	95570000	95580000	chr11	95840000	95850000
	chr12	71520000	71530000	chr12	71770000	71780000		chr12	58740000	58750000	chr12	59550000	59560000
	chr12	91770000	91780000	chr12	92000000	92010000		chr12	25580000	25590000	chr12	26110000	26120000
	chr12	67750000	67760000	chr12	67920000	67930000		chr12	42760000	42770000	chr12	42960000	42970000
	chr12	102780000	102790000	chr12	103140000	103150000		chr12	46900000	46910000	chr12	47320000	47330000
	chr12	10030000	10040000	chr12	10280000	10290000		chr12	54990000	55000000	chr12	55350000	55360000
	chr12	83080000	83090000	chr12	83280000	83290000		chr12	24270000	24280000	chr12	24740000	24750000
	chr12	39850000	39860000	chr12	40080000	40090000		chr13	47460000	47470000	chr13	48340000	48350000
	chr12	131010000	131020000	chr12	131210000	131220000		chr14	46320000	46330000	chr14	46590000	46600000
	chr12	85470000	85480000	chr12	85650000	85660000		chr14	42400000	42410000	chr14	42610000	42620000
	chr12	75940000	75950000	chr12	76090000	76100000		chr15	72880000	72890000	chr15	73050000	73060000
	chr12	44410000	44420000	chr12	45250000	45260000		chr18	48030000	48040000	chr18	48570000	48580000
	chr12	68530000	68540000	chr12	68710000	68720000		chr18	57570000	57580000	chr18	57710000	57720000
	chr12	127520000	127530000	chr12	127860000	127870000		chr18	26540000	26550000	chr18	27010000	27020000
	chr12	102860000	102870000	chr12	103150000	103160000		chr19	47790000	47800000	chr19	47980000	47990000
	chr12	97010000	97020000	chr12	97260000	97270000		chr19	51040000	51050000	chr19	51350000	51360000
	chr12	55230000	55240000	chr12	55380000	55390000		chr19	44460000	44470000	chr19	44850000	44860000
	chr12	92310000	92320000	chr12	92530000	92540000		chr1	203830000	203840000	chr1	204360000	204370000
	chr12	56200000	56210000	chr12	56480000	56490000		chr1	113260000	113270000	chr1	113520000	113530000
	chr12	55070000	55080000	chr12	55540000	55550000		chr21	16140000	16150000	chr21	16310000	16320000
	chr13	98660000	98670000	chr13	99040000	99050000		chr2	220600000	220610000	chr2	222430000	222440000
	chr13	86080000	86090000	chr13	86380000	86390000		chr2	54880000	54890000	chr2	55400000	55410000
	chr13	31210000	31220000	chr13	31610000	31620000		chr3	45260000	45270000	chr3	45700000	45710000
	chr13	96660000	96670000	chr13	96810000	96820000		chr4	157490000	157500000	chr4	157960000	157970000
	chr13	85960000	85970000	chr13	86370000	86380000		chr5	36260000	36270000	chr5	36500000	36510000
	chr13	26760000	26770000	chr13	27090000	27100000		chr5	64920000	64930000	chr5	65220000	65230000
	chr13	22200000	22210000	chr13	22860000	22870000		chr6	37740000	37750000	chr6	38460000	38470000
	chr13	80720000	80730000	chr13	80900000	80910000		chr6	157090000	157100000	chr6	157500000	157510000
	chr13	107860000	107870000	chr13	108510000	108520000		chr6	142790000	142800000	chr6	143250000	143260000
	chr13	111230000	111240000	chr13	111460000	111470000		chr7	93250000	93260000	chr7	93710000	93720000
	chr13	40640000	40650000	chr13	40820000	40830000		chr7	137700000	137710000	chr7	138420000	138430000
	chr13	102580000	102590000	chr13	103120000	103130000		chr8	18340000	18350000	chr8	18630000	18640000
	chr13	32490000	32500000	chr13	32740000	32750000		chr8	128750000	128760000	chr8	129660000	129670000
	chr13	43890000	43900000	chr13	44130000	44140000		chr9	74820000	74830000	chr9	75430000	75440000
	chr13	25640000	25650000	chr13	25950000	25960000		chrX	45170000	45180000	chrX	45680000	45690000
	chr13	45060000	45070000	chr13	45300000	45310000		chrX	26660000	26670000	chrX	27200000	27210000
	chr13	113590000	113600000	chr13	113830000	113840000		chrX	104440000	104450000	chrX	104760000	104770000
	chr13	106720000	106730000	chr13	107160000	107170000		chrX	36600000	36610000	chrX	36850000	36860000
	chr13	49000000	49010000	chr13	49330000	49340000		chrX	23090000	23100000	chrX	23560000	23570000
	chr13	109790000	109800000	chr13	110050000	110060000		chrX	107070000	107080000	chrX	107310000	107320000
	chr13	98790000	98800000	chr13	99030000	99040000		chr2	71830000	71840000	chr2	72370000	72380000
	chr13	40810000	40820000	chr13	41240000	41250000		chr6	1740000	1750000	chr6	2100000	2110000
	chr13	44010000	44020000	chr13	44350000	44360000		chrX	149130000	149140000	chrX	149490000	149500000
	chr13	19290000	19300000	chr13	19990000	20000000		chr10	23050000	23060000	chr10	23340000	23350000
	chr13	107580000	107590000	chr13	107750000	107760000		chr10	100220000	100230000	chr10	100800000	100810000
	chr13	26940000	26950000	chr13	27060000	27070000		chr10	102970000	102980000	chr10	103530000	103540000
	chr13	48650000	48660000	chr13	49160000	49170000		chr10	22540000	22550000	chr10	22710000	22720000
	chr13	51090000	51100000	chr13	51480000	51490000		chr10	73450000	73460000	chr10	73650000	73660000
	chr13	80240000	80250000	chr13	80920000	80930000		chr10	81690000	81700000	chr10	82000000	82010000
	chr13	102830000	102840000	chr13	103210000	103220000		chr10	76170000	76180000	chr10	76850000	76860000
	chr13	51380000	51390000	chr13	51620000	51630000		chr10	127550000	127560000	chr10	128190000	128200000
	chr13	108030000	108040000	chr13	108230000	108240000		chr10	75530000	75540000	chr10	75850000	75860000
	chr13	40370000	40380000	chr13	40630000	40640000		chr10	93050000	93060000	chr10	93500000	93510000
	chr13	40270000	40280000	chr13	41250000	41260000		chr10	25240000	25250000	chr10	25350000	25360000
	chr13	59360000	59370000	chr13	59440000	59450000		chr10	117220000	117230000	chr10	117420000	117430000
	chr13	55140000	55150000	chr13	55320000	55330000		chr10	9460000	9470000	chr10	9610000	9620000
	chr13	104790000	104800000	chr13	104880000	104890000		chr10	129830000	129840000	chr10	129950000	129960000
	chr13	35490000	35500000	chr13	35700000	35710000		chr10	91900000	91910000	chr10	92400000	92410000
	chr13	85500000	85510000	chr13	85590000	85600000		chr10	99810000	99820000	chr10	100060000	100070000
	chr13	44680000	44690000	chr13	45020000	45030000		chr10	19950000	19960000	chr10	20070000	20080000
	chr13	90010000	90020000	chr13	90160000	90170000		chr10	75220000	75230000	chr10	75480000	75490000
	chr13	49660000	49670000	chr13	49850000	49860000		chr10	45740000	45750000	chr10	46150000	46160000
	chr13	58010000	58020000	chr13	58180000	58190000		chr10	93310000	93320000	chr10	93670000	93680000
	chr13	30840000	30850000	chr13	31150000	31160000		chr10	93250000	93260000	chr10	93560000	93570000
	chr13	48050000	48060000	chr13	48330000	48340000		chr10	76580000	76590000	chr10	76850000	76860000
	chr13	35790000	35800000	chr13	36190000	36200000		chr10	132000000	132010000	chr10	132130000	132140000
	chr13	81060000	81070000	chr13	81240000	81250000		chr10	76560000	76570000	chr10	76850000	76860000
	chr13	80550000	80560000	chr13	80910000	80920000		chr10	60650000	60660000	chr10	60940000	60950000
	chr13	46540000	46550000	chr13	46880000	46890000		chr10	90990000	91000000	chr10	91210000	91220000
	chr13	28890000	28900000	chr13	29150000	29160000		chr10	74120000	74130000	chr10	74780000	74790000
	chr13	61210000	61220000	chr13	61290000	61300000		chr10	110720000	110730000	chr10	111170000	111180000
	chr13	32920000	32930000	chr13	33010000	33020000		chr10	105710000	105720000	chr10	105980000	105990000
	chr13	43450000	43460000	chr13	43620000	43630000		chr10	119590000	119600000	chr10	119990000	120000000
	chr13	102590000	102600000	chr13	102770000	102780000		chr10	9380000	9390000	chr10	9460000	9470000
	chr13	25680000	25690000	chr13	25870000	25880000		chr11	34390000	34400000	chr11	34920000	34930000
	chr13	44170000	44180000	chr13	44360000	44370000		chr11	95580000	95590000	chr11	95840000	95850000
	chr13	85850000	85860000	chr13	86070000	86080000		chr11	104480000	104490000	chr11	104780000	104790000
	chr13	52500000	52510000	chr13	52790000	52800000		chr11	124080000	124090000	chr11	124230000	124240000
	chr14	30020000	30030000	chr14	30380000	30390000		chr11	9030000	9040000	chr11	9290000	9300000
	chr14	89120000	89130000	chr14	89480000	89490000		chr11	72560000	72570000	chr11	72710000	72720000
	chr14	56200000	56210000	chr14	56390000	56400000		chr11	84040000	84050000	chr11	84160000	84170000
	chr14	39190000	39200000	chr14	39460000	39470000		chr11	12330000	12340000	chr11	12670000	12680000
	chr14	22760000	22770000	chr14	22950000	22960000		chr11	2970000	2980000	chr11	3110000	3120000
	chr14	38390000	38400000	chr14	38660000	38670000		chr11	11820000	11830000	chr11	12300000	12310000
	chr14	39980000	39990000	chr14	40400000	40410000		chr11	9990000	10000000	chr11	10340000	10350000
	chr14	103600000	103610000	chr14	103850000	103860000		chr11	123940000	123950000	chr11	124270000	124280000
	chr14	45120000	45130000	chr14	45240000	45250000		chr11	12510000	12520000	chr11	12680000	12690000
	chr14	63530000	63540000	chr14	63700000	63710000		chr11	65090000	65100000	chr11	65280000	65290000
	chr14	67390000	67400000	chr14	67600000	67610000		chr11	2560000	2570000	chr11	2790000	2800000
	chr14	74190000	74200000	chr14	74490000	74500000		chr11	68880000	68890000	chr11	69370000	69380000
	chr14	106540000	106550000	chr14	106810000	106820000		chr11	54940000	54950000	chr11	55460000	55470000
	chr14	25200000	25210000	chr14	25500000	25510000		chr11	113300000	113310000	chr11	113390000	113400000
	chr14	106730000	106740000	chr14	106810000	106820000		chr11	16210000	16220000	chr11	16320000	16330000
	chr14	83170000	83180000	chr14	83520000	83530000		chr11	113960000	113970000	chr11	114130000	114140000
	chr14	50590000	50600000	chr14	50990000	51000000		chr12	91770000	91780000	chr12	92380000	92390000
	chr14	85750000	85760000	chr14	85970000	85980000		chr12	91780000	91790000	chr12	92090000	92100000
	chr14	27060000	27070000	chr14	27450000	27460000		chr12	25730000	25740000	chr12	26180000	26190000
	chr14	30160000	30170000	chr14	30470000	30480000		chr12	10310000	10320000	chr12	10710000	10720000
	chr14	107010000	107020000	chr14	107140000	107150000		chr12	26260000	26270000	chr12	26640000	26650000
	chr14	106610000	106620000	chr14	106810000	106820000		chr12	46740000	46750000	chr12	47380000	47390000
	chr14	56180000	56190000	chr14	56450000	56460000		chr12	80840000	80850000	chr12	81340000	81350000
	chr14	72700000	72710000	chr14	72880000	72890000		chr12	18400000	18410000	chr12	19340000	19350000
	chr14	57120000	57130000	chr14	57360000	57370000		chr12	47200000	47210000	chr12	47390000	47400000
	chr14	30220000	30230000	chr14	30460000	30470000		chr12	47160000	47170000	chr12	47390000	47400000
	chr14	106830000	106840000	chr14	106990000	107000000		chr12	15430000	15440000	chr12	16010000	16020000
	chr14	20200000	20210000	chr14	20620000	20630000		chr12	22230000	22240000	chr12	22780000	22790000
	chr14	27190000	27200000	chr14	27450000	27460000		chr12	31950000	31960000	chr12	32210000	32220000
	chr14	32470000	32480000	chr14	32710000	32720000		chr12	54990000	55000000	chr12	55340000	55350000
	chr15	38540000	38550000	chr15	38670000	38680000		chr12	93170000	93180000	chr12	93510000	93520000
	chr15	49520000	49530000	chr15	50340000	50350000		chr12	21460000	21470000	chr12	21790000	21800000
	chr15	24930000	24940000	chr15	25090000	25100000		chr12	92200000	92210000	chr12	92960000	92970000
	chr15	79680000	79690000	chr15	80130000	80140000		chr12	92540000	92550000	chr12	92900000	92910000
	chr15	30100000	30110000	chr15	30340000	30350000		chr12	40830000	40840000	chr12	41310000	41320000
	chr15	94340000	94350000	chr15	94510000	94520000		chr12	90020000	90030000	chr12	90480000	90490000
	chr15	96470000	96480000	chr15	96690000	96700000		chr12	66660000	66670000	chr12	67080000	67090000
	chr15	46380000	46390000	chr15	46530000	46540000		chr12	29700000	29710000	chr12	30040000	30050000
	chr15	20400000	20410000	chr15	20580000	20590000		chr12	11180000	11190000	chr12	11300000	11310000
	chr15	79910000	79920000	chr15	80040000	80050000		chr12	18580000	18590000	chr12	19330000	19340000
	chr15	62680000	62690000	chr15	62870000	62880000		chr12	57080000	57090000	chr12	57380000	57390000
	chr15	35370000	35380000	chr15	35560000	35570000		chr12	105480000	105490000	chr12	105770000	105780000
	chr15	35660000	35670000	chr15	35740000	35750000		chr12	110830000	110840000	chr12	111040000	111050000
	chr15	53890000	53900000	chr15	54010000	54020000		chr12	6080000	6090000	chr12	6250000	6260000
	chr15	93620000	93630000	chr15	93760000	93770000		chr12	25580000	25590000	chr12	26070000	26080000
	chr16	82060000	82070000	chr16	82370000	82380000		chr12	75920000	75930000	chr12	76280000	76290000
	chr16	63510000	63520000	chr16	63660000	63670000		chr12	47080000	47090000	chr12	47270000	47280000
	chr16	50050000	50060000	chr16	50360000	50370000		chr12	6090000	6100000	chr12	6300000	6310000
	chr16	57780000	57790000	chr16	58150000	58160000		chr12	92540000	92550000	chr12	93040000	93050000
	chr16	54300000	54310000	chr16	54550000	54560000		chr13	30980000	30990000	chr13	31370000	31380000
	chr16	73600000	73610000	chr16	74070000	74080000		chr13	20760000	20770000	chr13	21390000	21400000
	chr16	46960000	46970000	chr16	48200000	48210000		chr13	34370000	34380000	chr13	34640000	34650000
	chr16	58590000	58600000	chr16	58770000	58780000		chr13	80200000	80210000	chr13	80910000	80920000
	chr16	16870000	16880000	chr16	17180000	17190000		chr13	37980000	37990000	chr13	38170000	38180000
	chr16	58140000	58150000	chr16	58330000	58340000		chr13	90730000	90740000	chr13	91510000	91520000
	chr16	79670000	79680000	chr16	80120000	80130000		chr13	85500000	85510000	chr13	85620000	85630000
	chr16	22710000	22720000	chr16	23020000	23030000		chr13	37690000	37700000	chr13	37890000	37900000
	chr16	86300000	86310000	chr16	86540000	86550000		chr13	39360000	39370000	chr13	39480000	39490000
	chr16	29240000	29250000	chr16	29630000	29640000		chr13	44560000	44570000	chr13	45020000	45030000
	chr16	50610000	50620000	chr16	50820000	50830000		chr13	34670000	34680000	chr13	34890000	34900000
	chr16	84800000	84810000	chr16	85120000	85130000		chr13	47830000	47840000	chr13	48140000	48150000
	chr16	88090000	88100000	chr16	88360000	88370000		chr13	40420000	40430000	chr13	41280000	41290000
	chr16	67590000	67600000	chr16	67970000	67980000		chr13	100910000	100920000	chr13	101040000	101050000
	chr16	460000	470000	chr16	680000	690000		chr13	30340000	30350000	chr13	30560000	30570000
	chr16	49670000	49680000	chr16	49880000	49890000		chr13	26750000	26760000	chr13	26990000	27000000
	chr16	52570000	52580000	chr16	52870000	52880000		chr13	39710000	39720000	chr13	39990000	40000000
	chr16	68120000	68130000	chr16	68360000	68370000		chr13	40640000	40650000	chr13	41170000	41180000
	chr16	23100000	23110000	chr16	23450000	23460000		chr14	103160000	103170000	chr14	103540000	103550000
	chr16	28260000	28270000	chr16	28340000	28350000		chr14	26960000	26970000	chr14	27190000	27200000
	chr16	71750000	71760000	chr16	71970000	71980000		chr14	57330000	57340000	chr14	57650000	57660000
	chr16	11050000	11060000	chr16	11210000	11220000		chr14	24710000	24720000	chr14	24890000	24900000
	chr16	17650000	17660000	chr16	17850000	17860000		chr14	93280000	93290000	chr14	93380000	93390000
	chr16	83130000	83140000	chr16	83290000	83300000		chr14	56970000	56980000	chr14	57110000	57120000
	chr16	22680000	22690000	chr16	22960000	22970000		chr14	56960000	56970000	chr14	57330000	57340000
	chr16	56200000	56210000	chr16	56350000	56360000		chr14	104530000	104540000	chr14	104770000	104780000
	chr16	52580000	52590000	chr16	52840000	52850000		chr14	51950000	51960000	chr14	52240000	52250000
	chr16	80550000	80560000	chr16	80920000	80930000		chr14	36540000	36550000	chr14	36650000	36660000
	chr16	82290000	82300000	chr16	82530000	82540000		chr14	78910000	78920000	chr14	79300000	79310000
	chr16	12700000	12710000	chr16	12990000	13000000		chr14	75780000	75790000	chr14	76070000	76080000
	chr16	47350000	47360000	chr16	47550000	47560000		chr14	30030000	30040000	chr14	30120000	30130000
	chr16	88510000	88520000	chr16	88720000	88730000		chr14	83600000	83610000	chr14	83740000	83750000
	chr16	63380000	63390000	chr16	63470000	63480000		chr14	34000000	34010000	chr14	34250000	34260000
	chr16	48880000	48890000	chr16	49020000	49030000		chr14	103960000	103970000	chr14	104100000	104110000
	chr16	50880000	50890000	chr16	51040000	51050000		chr14	40280000	40290000	chr14	40420000	40430000
	chr17	13490000	13500000	chr17	14820000	14830000		chr14	52420000	52430000	chr14	52600000	52610000
	chr17	9000000	9010000	chr17	9450000	9460000		chr14	105770000	105780000	chr14	105980000	105990000
	chr17	8910000	8920000	chr17	9150000	9160000		chr14	29230000	29240000	chr14	29630000	29640000
	chr17	57380000	57390000	chr17	57700000	57710000		chr14	43770000	43780000	chr14	44000000	44010000
	chr17	20950000	20960000	chr17	21160000	21170000		chr14	44640000	44650000	chr14	44880000	44890000
	chr17	7400000	7410000	chr17	7580000	7590000		chr14	92790000	92800000	chr14	93140000	93150000
	chr17	48920000	48930000	chr17	49110000	49120000		chr14	38970000	38980000	chr14	39060000	39070000
	chr17	48610000	48620000	chr17	48900000	48910000		chr14	25890000	25900000	chr14	26030000	26040000
	chr17	32870000	32880000	chr17	33200000	33210000		chr14	52090000	52100000	chr14	52240000	52250000
	chr17	1020000	1030000	chr17	1240000	1250000		chr14	75320000	75330000	chr14	75470000	75480000
	chr17	59330000	59340000	chr17	59470000	59480000		chr14	48400000	48410000	chr14	48610000	48620000
	chr17	34190000	34200000	chr17	34330000	34340000		chr15	41210000	41220000	chr15	41620000	41630000
	chr17	40370000	40380000	chr17	40670000	40680000		chr15	39120000	39130000	chr15	39810000	39820000
	chr17	64910000	64920000	chr17	65100000	65110000		chr15	61880000	61890000	chr15	62120000	62130000
	chr17	12580000	12590000	chr17	12910000	12920000		chr15	60280000	60290000	chr15	60610000	60620000
	chr17	43220000	43230000	chr17	43460000	43470000		chr15	36930000	36940000	chr15	37140000	37150000
	chr17	33490000	33500000	chr17	33740000	33750000		chr15	30940000	30950000	chr15	31040000	31050000
	chr17	39000000	39010000	chr17	39190000	39200000		chr15	56890000	56900000	chr15	57140000	57150000
	chr17	19260000	19270000	chr17	19540000	19550000		chr15	34370000	34380000	chr15	34800000	34810000
	chr17	47400000	47410000	chr17	47630000	47640000		chr15	87640000	87650000	chr15	87860000	87870000
	chr17	53630000	53640000	chr17	53900000	53910000		chr15	87940000	87950000	chr15	88120000	88130000
	chr17	4190000	4200000	chr17	4420000	4430000		chr15	56300000	56310000	chr15	56460000	56470000
	chr17	49660000	49670000	chr17	50180000	50190000		chr15	96170000	96180000	chr15	96340000	96350000
	chr17	49660000	49670000	chr17	49830000	49840000		chr15	60120000	60130000	chr15	60610000	60620000
	chr17	68760000	68770000	chr17	68930000	68940000		chr16	78530000	78540000	chr16	78800000	78810000
	chr17	10780000	10790000	chr17	11170000	11180000		chr16	22010000	22020000	chr16	22300000	22310000
	chr17	67870000	67880000	chr17	68140000	68150000		chr16	78150000	78160000	chr16	78470000	78480000
	chr17	26220000	26230000	chr17	26420000	26430000		chr16	74330000	74340000	chr16	74660000	74670000
	chr17	32160000	32170000	chr17	32470000	32480000		chr16	6070000	6080000	chr16	6210000	6220000
	chr17	55220000	55230000	chr17	55710000	55720000		chr16	57610000	57620000	chr16	57890000	57900000
	chr17	49720000	49730000	chr17	49820000	49830000		chr16	3740000	3750000	chr16	4300000	4310000
	chr17	18790000	18800000	chr17	18920000	18930000		chr16	9920000	9930000	chr16	10260000	10270000
	chr17	16100000	16110000	chr17	16340000	16350000		chr16	47290000	47300000	chr16	48190000	48200000
	chr18	71480000	71490000	chr18	71770000	71780000		chr16	86590000	86600000	chr16	87220000	87230000
	chr18	63880000	63890000	chr18	64140000	64150000		chr16	66430000	66440000	chr16	66900000	66910000
	chr18	53670000	53680000	chr18	53960000	53970000		chr16	34360000	34370000	chr16	34540000	34550000
	chr18	63160000	63170000	chr18	63400000	63410000		chr16	73990000	74000000	chr16	74300000	74310000
	chr18	52700000	52710000	chr18	52870000	52880000		chr16	70160000	70170000	chr16	70270000	70280000
	chr18	2120000	2130000	chr18	2300000	2310000		chr16	33820000	33830000	chr16	33910000	33920000
	chr18	70540000	70550000	chr18	70800000	70810000		chr16	74840000	74850000	chr16	75000000	75010000
	chr18	24580000	24590000	chr18	24900000	24910000		chr17	71720000	71730000	chr17	71830000	71840000
	chr18	45660000	45670000	chr18	45870000	45880000		chr17	43470000	43480000	chr17	43910000	43920000
	chr18	39120000	39130000	chr18	39310000	39320000		chr17	43480000	43490000	chr17	43570000	43580000
	chr18	45540000	45550000	chr18	45730000	45740000		chr17	78390000	78400000	chr17	78700000	78710000
	chr18	65630000	65640000	chr18	66310000	66320000		chr17	44790000	44800000	chr17	44990000	45000000
	chr18	51270000	51280000	chr18	51610000	51620000		chr17	46800000	46810000	chr17	47120000	47130000
	chr18	3270000	3280000	chr18	3850000	3860000		chr17	75080000	75090000	chr17	75480000	75490000
	chr18	77150000	77160000	chr18	77390000	77400000		chr17	25420000	25430000	chr17	25660000	25670000
	chr18	10270000	10280000	chr18	10500000	10510000		chr17	40990000	41000000	chr17	41220000	41230000
	chr18	9070000	9080000	chr18	9260000	9270000		chr17	30470000	30480000	chr17	30640000	30650000
	chr18	53830000	53840000	chr18	53970000	53980000		chr17	44070000	44080000	chr17	44350000	44360000
	chr18	53770000	53780000	chr18	53970000	53980000		chr17	58170000	58180000	chr17	58670000	58680000
	chr18	43190000	43200000	chr18	43480000	43490000		chr17	30810000	30820000	chr17	31210000	31220000
	chr18	57750000	57760000	chr18	58200000	58210000		chr17	48940000	48950000	chr17	49240000	49250000
	chr18	59610000	59620000	chr18	59710000	59720000		chr17	33000000	33010000	chr17	33300000	33310000
	chr18	39210000	39220000	chr18	39310000	39320000		chr17	57600000	57610000	chr17	57780000	57790000
	chr18	69890000	69900000	chr18	69970000	69980000		chr17	27460000	27470000	chr17	27700000	27710000
	chr18	24060000	24070000	chr18	24220000	24230000		chr17	56110000	56120000	chr17	56230000	56240000
	chr18	61910000	61920000	chr18	62070000	62080000		chr17	38770000	38780000	chr17	39020000	39030000
	chr18	65910000	65920000	chr18	66280000	66290000		chr17	37830000	37840000	chr17	38100000	38110000
	chr18	11720000	11730000	chr18	11910000	11920000		chr17	70160000	70170000	chr17	70520000	70530000
	chr18	25500000	25510000	chr18	25670000	25680000		chr17	5880000	5890000	chr17	6300000	6310000
	chr18	41500000	41510000	chr18	41640000	41650000		chr17	67560000	67570000	chr17	68280000	68290000
	chr18	13730000	13740000	chr18	13810000	13820000		chr18	9580000	9590000	chr18	9940000	9950000
	chr18	31420000	31430000	chr18	31700000	31710000		chr18	28650000	28660000	chr18	29100000	29110000
	chr18	6550000	6560000	chr18	6790000	6800000		chr18	48790000	48800000	chr18	49140000	49150000
	chr18	38190000	38200000	chr18	38660000	38670000		chr18	52890000	52900000	chr18	54240000	54250000
	chr18	19050000	19060000	chr18	19170000	19180000		chr18	53240000	53250000	chr18	53540000	53550000
	chr18	11240000	11250000	chr18	11380000	11390000		chr18	49620000	49630000	chr18	49810000	49820000
	chr18	70530000	70540000	chr18	70720000	70730000		chr18	58470000	58480000	chr18	59010000	59020000
	chr18	25360000	25370000	chr18	25670000	25680000		chr18	44050000	44060000	chr18	44230000	44240000
	chr18	25260000	25270000	chr18	25670000	25680000		chr18	46200000	46210000	chr18	46500000	46510000
	chr19	56430000	56440000	chr19	56560000	56570000		chr18	1320000	1330000	chr18	1480000	1490000
	chr19	20200000	20210000	chr19	20330000	20340000		chr18	53080000	53090000	chr18	53270000	53280000
	chr19	20370000	20380000	chr19	20630000	20640000		chr18	10160000	10170000	chr18	10490000	10500000
	chr19	20360000	20370000	chr19	20670000	20680000		chr18	10130000	10140000	chr18	10500000	10510000
	chr19	9310000	9320000	chr19	9610000	9620000		chr18	59380000	59390000	chr18	59790000	59800000
	chr19	9330000	9340000	chr19	9660000	9670000		chr18	69910000	69920000	chr18	70200000	70210000
	chr19	9240000	9250000	chr19	9910000	9920000		chr19	19640000	19650000	chr19	20040000	20050000
	chr19	19950000	19960000	chr19	20210000	20220000		chr19	51190000	51200000	chr19	51530000	51540000
	chr19	10380000	10390000	chr19	10550000	10560000		chr19	14300000	14310000	chr19	14590000	14600000
	chr19	7100000	7110000	chr19	7460000	7470000		chr19	6040000	6050000	chr19	6290000	6300000
	chr1	115790000	115800000	chr1	116110000	116120000		chr19	38390000	38400000	chr19	38820000	38830000
	chr1	86510000	86520000	chr1	86810000	86820000		chr19	40030000	40040000	chr19	40330000	40340000
	chr1	168700000	168710000	chr1	169070000	169080000		chr19	45920000	45930000	chr19	46190000	46200000
	chr1	165910000	165920000	chr1	166130000	166140000		chr19	7700000	7710000	chr19	7970000	7980000
	chr1	163040000	163050000	chr1	163260000	163270000		chr19	15730000	15740000	chr19	16060000	16070000
	chr1	38510000	38520000	chr1	39050000	39060000		chr19	37000000	37010000	chr19	37320000	37330000
	chr1	195910000	195920000	chr1	196080000	196090000		chr19	38030000	38040000	chr19	38300000	38310000
	chr1	210760000	210770000	chr1	211150000	211160000		chr19	37090000	37100000	chr19	37410000	37420000
	chr1	248410000	248420000	chr1	248850000	248860000		chr19	9390000	9400000	chr19	9550000	9560000
	chr1	70730000	70740000	chr1	70960000	70970000		chr19	19310000	19320000	chr19	19590000	19600000
	chr1	154730000	154740000	chr1	155020000	155030000		chr19	1530000	1540000	chr19	1710000	1720000
	chr1	55610000	55620000	chr1	55800000	55810000		chr19	560000	570000	chr19	740000	750000
	chr1	87380000	87390000	chr1	87550000	87560000		chr19	37720000	37730000	chr19	37830000	37840000
	chr1	246290000	246300000	chr1	246600000	246610000		chr19	5230000	5240000	chr19	5570000	5580000
	chr1	56340000	56350000	chr1	56490000	56500000		chr19	37280000	37290000	chr19	37680000	37690000
	chr1	240620000	240630000	chr1	240870000	240880000		chr19	2890000	2900000	chr19	3170000	3180000
	chr1	75420000	75430000	chr1	75650000	75660000		chr19	28370000	28380000	chr19	28500000	28510000
	chr1	15450000	15460000	chr1	15720000	15730000		chr19	36720000	36730000	chr19	36870000	36880000
	chr1	99790000	99800000	chr1	100170000	100180000		chr19	57400000	57410000	chr19	57580000	57590000
	chr1	32120000	32130000	chr1	32430000	32440000		chr19	57320000	57330000	chr19	57580000	57590000
	chr1	161160000	161170000	chr1	161710000	161720000		chr19	57910000	57920000	chr19	58280000	58290000
	chr1	82270000	82280000	chr1	82460000	82470000		chr1	115610000	115620000	chr1	116130000	116140000
	chr1	50560000	50570000	chr1	50780000	50790000		chr1	103120000	103130000	chr1	103430000	103440000
	chr1	31640000	31650000	chr1	32030000	32040000		chr1	32040000	32050000	chr1	32250000	32260000
	chr1	77700000	77710000	chr1	77990000	78000000		chr1	152840000	152850000	chr1	153260000	153270000
	chr1	35900000	35910000	chr1	36230000	36240000		chr1	207220000	207230000	chr1	207500000	207510000
	chr1	17820000	17830000	chr1	18140000	18150000		chr1	118690000	118700000	chr1	119550000	119560000
	chr1	76080000	76090000	chr1	76250000	76260000		chr1	11730000	11740000	chr1	11840000	11850000
	chr1	199080000	199090000	chr1	199390000	199400000		chr1	241690000	241700000	chr1	242150000	242160000
	chr1	178490000	178500000	chr1	179040000	179050000		chr1	11890000	11900000	chr1	12020000	12030000
	chr1	94370000	94380000	chr1	94790000	94800000		chr1	59250000	59260000	chr1	59760000	59770000
	chr1	193360000	193370000	chr1	193720000	193730000		chr1	165590000	165600000	chr1	165720000	165730000
	chr1	20230000	20240000	chr1	20850000	20860000		chr1	173830000	173840000	chr1	174180000	174190000
	chr1	234630000	234640000	chr1	234810000	234820000		chr1	21000000	21010000	chr1	21170000	21180000
	chr1	168580000	168590000	chr1	168850000	168860000		chr1	108320000	108330000	chr1	108750000	108760000
	chr1	89470000	89480000	chr1	89660000	89670000		chr1	203830000	203840000	chr1	204340000	204350000
	chr1	186370000	186380000	chr1	186800000	186810000		chr1	24870000	24880000	chr1	25150000	25160000
	chr1	179330000	179340000	chr1	179560000	179570000		chr1	17980000	17990000	chr1	18420000	18430000
	chr1	221670000	221680000	chr1	222330000	222340000		chr1	17980000	17990000	chr1	18150000	18160000
	chr1	8970000	8980000	chr1	9310000	9320000		chr1	26810000	26820000	chr1	26900000	26910000
	chr1	59230000	59240000	chr1	59460000	59470000		chr1	211860000	211870000	chr1	212060000	212070000
	chr1	84380000	84390000	chr1	84900000	84910000		chr1	239670000	239680000	chr1	240050000	240060000
	chr1	218150000	218160000	chr1	218320000	218330000		chr1	3370000	3380000	chr1	3620000	3630000
	chr1	110180000	110190000	chr1	110460000	110470000		chr1	105930000	105940000	chr1	106010000	106020000
	chr1	175450000	175460000	chr1	175700000	175710000		chr1	10700000	10710000	chr1	11020000	11030000
	chr1	85020000	85030000	chr1	85230000	85240000		chr1	62070000	62080000	chr1	62310000	62320000
	chr1	6090000	6100000	chr1	6400000	6410000		chr1	245850000	245860000	chr1	246150000	246160000
	chr1	202150000	202160000	chr1	202640000	202650000		chr1	184290000	184300000	chr1	184650000	184660000
	chr1	94500000	94510000	chr1	94900000	94910000		chr1	11910000	11920000	chr1	12150000	12160000
	chr1	43370000	43380000	chr1	43670000	43680000		chr1	179140000	179150000	chr1	179330000	179340000
	chr1	65810000	65820000	chr1	66140000	66150000		chr1	11890000	11900000	chr1	12090000	12100000
	chr1	178270000	178280000	chr1	178950000	178960000		chr1	88180000	88190000	chr1	88410000	88420000
	chr1	119940000	119950000	chr1	120130000	120140000		chr20	31480000	31490000	chr20	31880000	31890000
	chr1	49030000	49040000	chr1	49300000	49310000		chr20	17680000	17690000	chr20	17770000	17780000
	chr1	166140000	166150000	chr1	166390000	166400000		chr20	17640000	17650000	chr20	17970000	17980000
	chr1	160660000	160670000	chr1	161090000	161100000		chr20	17700000	17710000	chr20	17860000	17870000
	chr1	225820000	225830000	chr1	226010000	226020000		chr20	37070000	37080000	chr20	37370000	37380000
	chr1	118690000	118700000	chr1	119010000	119020000		chr20	26150000	26160000	chr20	26280000	26290000
	chr1	107850000	107860000	chr1	108290000	108300000		chr20	30740000	30750000	chr20	31060000	31070000
	chr1	18250000	18260000	chr1	18910000	18920000		chr20	32570000	32580000	chr20	32720000	32730000
	chr1	93310000	93320000	chr1	93580000	93590000		chr21	45560000	45570000	chr21	45890000	45900000
	chr1	32240000	32250000	chr1	32510000	32520000		chr21	31320000	31330000	chr21	31550000	31560000
	chr1	103590000	103600000	chr1	103730000	103740000		chr21	40030000	40040000	chr21	40170000	40180000
	chr1	228980000	228990000	chr1	229310000	229320000		chr21	42850000	42860000	chr21	43220000	43230000
	chr1	92780000	92790000	chr1	92970000	92980000		chr21	28240000	28250000	chr21	28600000	28610000
	chr1	74160000	74170000	chr1	74300000	74310000		chr22	20910000	20920000	chr22	21090000	21100000
	chr1	16400000	16410000	chr1	16640000	16650000		chr22	24370000	24380000	chr22	24570000	24580000
	chr1	96700000	96710000	chr1	96790000	96800000		chr22	32870000	32880000	chr22	33020000	33030000
	chr1	82010000	82020000	chr1	82140000	82150000		chr22	38450000	38460000	chr22	38860000	38870000
	chr1	107460000	107470000	chr1	107660000	107670000		chr22	43050000	43060000	chr22	43430000	43440000
	chr1	236360000	236370000	chr1	236550000	236560000		chr22	43630000	43640000	chr22	43820000	43830000
	chr1	96470000	96480000	chr1	96640000	96650000		chr2	88540000	88550000	chr2	88850000	88860000
	chr1	115860000	115870000	chr1	116140000	116150000		chr2	120870000	120880000	chr2	121070000	121080000
	chr1	111160000	111170000	chr1	111380000	111390000		chr2	225320000	225330000	chr2	225510000	225520000
	chr1	91540000	91550000	chr1	91630000	91640000		chr2	56420000	56430000	chr2	56800000	56810000
	chr1	196410000	196420000	chr1	196600000	196610000		chr2	234190000	234200000	chr2	234740000	234750000
	chr1	166460000	166470000	chr1	166730000	166740000		chr2	62150000	62160000	chr2	62310000	62320000
	chr1	215150000	215160000	chr1	215300000	215310000		chr2	61250000	61260000	chr2	61700000	61710000
	chr1	217310000	217320000	chr1	217500000	217510000		chr2	48080000	48090000	chr2	48640000	48650000
	chr1	103140000	103150000	chr1	103420000	103430000		chr2	135730000	135740000	chr2	136550000	136560000
	chr1	103190000	103200000	chr1	103430000	103440000		chr2	128630000	128640000	chr2	128850000	128860000
	chr1	107970000	107980000	chr1	108230000	108240000		chr2	101950000	101960000	chr2	102440000	102450000
	chr1	15540000	15550000	chr1	15760000	15770000		chr2	69800000	69810000	chr2	70040000	70050000
	chr1	217120000	217130000	chr1	217200000	217210000		chr2	97210000	97220000	chr2	97460000	97470000
	chr1	163340000	163350000	chr1	163500000	163510000		chr2	230130000	230140000	chr2	230290000	230300000
	chr1	10000000	10010000	chr1	10290000	10300000		chr2	164200000	164210000	chr2	164980000	164990000
	chr1	64270000	64280000	chr1	64590000	64600000		chr2	167550000	167560000	chr2	167730000	167740000
	chr1	79420000	79430000	chr1	79650000	79660000		chr2	153020000	153030000	chr2	153560000	153570000
	chr1	49720000	49730000	chr1	50080000	50090000		chr2	131560000	131570000	chr2	131850000	131860000
	chr1	57890000	57900000	chr1	58100000	58110000		chr2	153780000	153790000	chr2	154330000	154340000
	chr1	79960000	79970000	chr1	80480000	80490000		chr2	153780000	153790000	chr2	154150000	154160000
	chr1	176640000	176650000	chr1	176840000	176850000		chr2	174270000	174280000	chr2	175210000	175220000
	chr1	107900000	107910000	chr1	108290000	108300000		chr2	88650000	88660000	chr2	88850000	88860000
	chr1	193350000	193360000	chr1	193510000	193520000		chr2	132250000	132260000	chr2	132430000	132440000
	chr1	48810000	48820000	chr1	48980000	48990000		chr2	11490000	11500000	chr2	11580000	11590000
	chr1	84040000	84050000	chr1	84310000	84320000		chr2	9610000	9620000	chr2	9750000	9760000
	chr1	112560000	112570000	chr1	112770000	112780000		chr2	171830000	171840000	chr2	172080000	172090000
	chr1	90580000	90590000	chr1	90940000	90950000		chr2	173900000	173910000	chr2	174140000	174150000
	chr1	75880000	75890000	chr1	76080000	76090000		chr2	148540000	148550000	chr2	148670000	148680000
	chr1	157240000	157250000	chr1	157470000	157480000		chr2	50730000	50740000	chr2	50810000	50820000
	chr1	113670000	113680000	chr1	113850000	113860000		chr2	158980000	158990000	chr2	159600000	159610000
	chr1	185890000	185900000	chr1	186190000	186200000		chr2	171820000	171830000	chr2	172110000	172120000
	chr1	169890000	169900000	chr1	170230000	170240000		chr2	85950000	85960000	chr2	86230000	86240000
	chr1	70780000	70790000	chr1	70960000	70970000		chr2	28230000	28240000	chr2	28600000	28610000
	chr1	80150000	80160000	chr1	80340000	80350000		chr2	209280000	209290000	chr2	209670000	209680000
	chr1	38500000	38510000	chr1	38720000	38730000		chr2	156080000	156090000	chr2	156160000	156170000
	chr1	210030000	210040000	chr1	210230000	210240000		chr2	212870000	212880000	chr2	212980000	212990000
	chr1	75240000	75250000	chr1	75500000	75510000		chr2	95340000	95350000	chr2	95480000	95490000
	chr1	47490000	47500000	chr1	47620000	47630000		chr2	137180000	137190000	chr2	137350000	137360000
	chr1	236380000	236390000	chr1	236690000	236700000		chr2	204050000	204060000	chr2	204310000	204320000
	chr1	50160000	50170000	chr1	50240000	50250000		chr2	175620000	175630000	chr2	175890000	175900000
	chr1	18420000	18430000	chr1	18550000	18560000		chr2	182020000	182030000	chr2	182330000	182340000
	chr1	101190000	101200000	chr1	101330000	101340000		chr2	100520000	100530000	chr2	100850000	100860000
	chr1	151280000	151290000	chr1	151420000	151430000		chr2	129080000	129090000	chr2	129430000	129440000
	chr1	227040000	227050000	chr1	227190000	227200000		chr2	166250000	166260000	chr2	166610000	166620000
	chr1	89070000	89080000	chr1	89230000	89240000		chr2	215750000	215760000	chr2	216130000	216140000
	chr1	166630000	166640000	chr1	166790000	166800000		chr2	40140000	40150000	chr2	40740000	40750000
	chr1	221750000	221760000	chr1	221910000	221920000		chr3	146150000	146160000	chr3	146280000	146290000
	chr1	168700000	168710000	chr1	168870000	168880000		chr3	129340000	129350000	chr3	129720000	129730000
	chr1	59560000	59570000	chr1	59740000	59750000		chr3	5490000	5500000	chr3	5780000	5790000
	chr1	193150000	193160000	chr1	193340000	193350000		chr3	61550000	61560000	chr3	61670000	61680000
	chr1	25010000	25020000	chr1	25230000	25240000		chr3	50650000	50660000	chr3	51410000	51420000
	chr1	233570000	233580000	chr1	233800000	233810000		chr3	61400000	61410000	chr3	61500000	61510000
	chr1	113760000	113770000	chr1	114000000	114010000		chr3	31650000	31660000	chr3	32010000	32020000
	chr1	91990000	92000000	chr1	92260000	92270000		chr3	150430000	150440000	chr3	150860000	150870000
	chr20	16480000	16490000	chr20	16700000	16710000		chr3	150940000	150950000	chr3	151550000	151560000
	chr20	14980000	14990000	chr20	15140000	15150000		chr3	193380000	193390000	chr3	193860000	193870000
	chr20	14980000	14990000	chr20	15210000	15220000		chr3	23010000	23020000	chr3	23190000	23200000
	chr20	58370000	58380000	chr20	58510000	58520000		chr3	162490000	162500000	chr3	162710000	162720000
	chr20	23690000	23700000	chr20	23870000	23880000		chr3	162500000	162510000	chr3	162630000	162640000
	chr20	18880000	18890000	chr20	19180000	19190000		chr3	189300000	189310000	chr3	189660000	189670000
	chr20	6470000	6480000	chr20	6560000	6570000		chr3	197320000	197330000	chr3	197600000	197610000
	chr20	32260000	32270000	chr20	32700000	32710000		chr3	43000000	43010000	chr3	43420000	43430000
	chr20	60550000	60560000	chr20	60830000	60840000		chr3	39620000	39630000	chr3	39710000	39720000
	chr20	2680000	2690000	chr20	2950000	2960000		chr3	176760000	176770000	chr3	177490000	177500000
	chr20	19310000	19320000	chr20	19560000	19570000		chr3	176760000	176770000	chr3	177300000	177310000
	chr20	22920000	22930000	chr20	23020000	23030000		chr3	96580000	96590000	chr3	96730000	96740000
	chr20	15460000	15470000	chr20	15740000	15750000		chr3	49980000	49990000	chr3	50110000	50120000
	chr20	24770000	24780000	chr20	24910000	24920000		chr3	47910000	47920000	chr3	48200000	48210000
	chr20	6230000	6240000	chr20	6450000	6460000		chr3	61520000	61530000	chr3	61730000	61740000
	chr20	19000000	19010000	chr20	19170000	19180000		chr3	189040000	189050000	chr3	189660000	189670000
	chr20	14490000	14500000	chr20	14690000	14700000		chr3	23240000	23250000	chr3	23610000	23620000
	chr20	29490000	29500000	chr20	29570000	29580000		chr3	44900000	44910000	chr3	45040000	45050000
	chr20	25660000	25670000	chr20	25750000	25760000		chr3	175930000	175940000	chr3	176120000	176130000
	chr20	15250000	15260000	chr20	15330000	15340000		chr3	2810000	2820000	chr3	2920000	2930000
	chr20	40170000	40180000	chr20	40320000	40330000		chr3	74920000	74930000	chr3	75040000	75050000
	chr20	35810000	35820000	chr20	35890000	35900000		chr3	6980000	6990000	chr3	7110000	7120000
	chr20	11980000	11990000	chr20	12180000	12190000		chr3	195110000	195120000	chr3	195260000	195270000
	chr20	36190000	36200000	chr20	36320000	36330000		chr3	11520000	11530000	chr3	11680000	11690000
	chr20	54370000	54380000	chr20	54580000	54590000		chr3	12170000	12180000	chr3	12460000	12470000
	chr20	12470000	12480000	chr20	12660000	12670000		chr4	167940000	167950000	chr4	168540000	168550000
	chr20	50860000	50870000	chr20	51040000	51050000		chr4	17830000	17840000	chr4	18010000	18020000
	chr20	49600000	49610000	chr20	49740000	49750000		chr4	15730000	15740000	chr4	15990000	16000000
	chr20	6800000	6810000	chr20	6950000	6960000		chr4	35930000	35940000	chr4	36190000	36200000
	chr21	47560000	47570000	chr21	48050000	48060000		chr4	186390000	186400000	chr4	186960000	186970000
	chr21	38620000	38630000	chr21	39000000	39010000		chr4	186450000	186460000	chr4	186950000	186960000
	chr21	37790000	37800000	chr21	38040000	38050000		chr4	37600000	37610000	chr4	38030000	38040000
	chr21	28250000	28260000	chr21	28590000	28600000		chr4	152960000	152970000	chr4	153270000	153280000
	chr21	33680000	33690000	chr21	33970000	33980000		chr4	190170000	190180000	chr4	190420000	190430000
	chr21	36270000	36280000	chr21	36580000	36590000		chr4	143200000	143210000	chr4	143630000	143640000
	chr21	29740000	29750000	chr21	29990000	30000000		chr4	146860000	146870000	chr4	147150000	147160000
	chr21	36960000	36970000	chr21	37210000	37220000		chr4	78880000	78890000	chr4	79780000	79790000
	chr21	40570000	40580000	chr21	40810000	40820000		chr4	140330000	140340000	chr4	140540000	140550000
	chr21	23140000	23150000	chr21	23270000	23280000		chr4	138650000	138660000	chr4	138780000	138790000
	chr21	46960000	46970000	chr21	47330000	47340000		chr4	138650000	138660000	chr4	139080000	139090000
	chr21	44700000	44710000	chr21	44910000	44920000		chr4	138650000	138660000	chr4	139010000	139020000
	chr21	39780000	39790000	chr21	40530000	40540000		chr4	46840000	46850000	chr4	47030000	47040000
	chr21	36900000	36910000	chr21	37220000	37230000		chr4	158770000	158780000	chr4	158870000	158880000
	chr21	16230000	16240000	chr21	16570000	16580000		chr4	29510000	29520000	chr4	29770000	29780000
	chr21	24160000	24170000	chr21	24390000	24400000		chr4	56810000	56820000	chr4	57170000	57180000
	chr21	36260000	36270000	chr21	36600000	36610000		chr4	157530000	157540000	chr4	157670000	157680000
	chr21	44590000	44600000	chr21	44980000	44990000		chr4	140650000	140660000	chr4	141170000	141180000
	chr21	29070000	29080000	chr21	29160000	29170000		chr4	72590000	72600000	chr4	73330000	73340000
	chr21	29820000	29830000	chr21	30090000	30100000		chr4	78030000	78040000	chr4	78220000	78230000
	chr21	25510000	25520000	chr21	25730000	25740000		chr4	24560000	24570000	chr4	24980000	24990000
	chr21	34500000	34510000	chr21	34830000	34840000		chr4	24480000	24490000	chr4	25150000	25160000
	chr21	27880000	27890000	chr21	28080000	28090000		chr4	30710000	30720000	chr4	31670000	31680000
	chr21	28800000	28810000	chr21	29080000	29090000		chr4	187560000	187570000	chr4	187850000	187860000
	chr21	23220000	23230000	chr21	23300000	23310000		chr4	164100000	164110000	chr4	164240000	164250000
	chr21	36000000	36010000	chr21	36080000	36090000		chr4	8680000	8690000	chr4	8860000	8870000
	chr21	32750000	32760000	chr21	32960000	32970000		chr4	83400000	83410000	chr4	83570000	83580000
	chr22	50670000	50680000	chr22	51130000	51140000		chr4	91570000	91580000	chr4	91690000	91700000
	chr22	32480000	32490000	chr22	32740000	32750000		chr4	55490000	55500000	chr4	55610000	55620000
	chr22	24430000	24440000	chr22	24640000	24650000		chr4	82320000	82330000	chr4	82400000	82410000
	chr22	26330000	26340000	chr22	26730000	26740000		chr4	100000	110000	chr4	480000	490000
	chr22	34850000	34860000	chr22	35120000	35130000		chr4	81290000	81300000	chr4	81590000	81600000
	chr22	30870000	30880000	chr22	31140000	31150000		chr4	170530000	170540000	chr4	170720000	170730000
	chr22	32380000	32390000	chr22	32580000	32590000		chr4	173140000	173150000	chr4	173480000	173490000
	chr22	19180000	19190000	chr22	19470000	19480000		chr4	158690000	158700000	chr4	158890000	158900000
	chr22	22540000	22550000	chr22	22780000	22790000		chr4	187150000	187160000	chr4	187350000	187360000
	chr22	34190000	34200000	chr22	34300000	34310000		chr4	129110000	129120000	chr4	129420000	129430000
	chr22	28720000	28730000	chr22	28970000	28980000		chr4	99710000	99720000	chr4	99960000	99970000
	chr22	44780000	44790000	chr22	45020000	45030000		chr4	189190000	189200000	chr4	189310000	189320000
	chr2	72030000	72040000	chr2	72240000	72250000		chr4	174500000	174510000	chr4	174660000	174670000
	chr2	175320000	175330000	chr2	175550000	175560000		chr4	129820000	129830000	chr4	130020000	130030000
	chr2	159100000	159110000	chr2	159310000	159320000		chr4	148470000	148480000	chr4	148780000	148790000
	chr2	148360000	148370000	chr2	148600000	148610000		chr4	141420000	141430000	chr4	141760000	141770000
	chr2	16420000	16430000	chr2	16660000	16670000		chr4	24480000	24490000	chr4	24850000	24860000
	chr2	198670000	198680000	chr2	198960000	198970000		chr4	166510000	166520000	chr4	167000000	167010000
	chr2	135320000	135330000	chr2	135650000	135660000		chr5	162990000	163000000	chr5	163110000	163120000
	chr2	39660000	39670000	chr2	39930000	39940000		chr5	103270000	103280000	chr5	103520000	103530000
	chr2	177690000	177700000	chr2	177930000	177940000		chr5	111130000	111140000	chr5	111470000	111480000
	chr2	233620000	233630000	chr2	233880000	233890000		chr5	152370000	152380000	chr5	152500000	152510000
	chr2	65870000	65880000	chr2	66080000	66090000		chr5	68330000	68340000	chr5	68580000	68590000
	chr2	157470000	157480000	chr2	157890000	157900000		chr5	163120000	163130000	chr5	163920000	163930000
	chr2	217560000	217570000	chr2	217900000	217910000		chr5	96560000	96570000	chr5	96870000	96880000
	chr2	189470000	189480000	chr2	189840000	189850000		chr5	102010000	102020000	chr5	102270000	102280000
	chr2	177160000	177170000	chr2	177500000	177510000		chr5	162990000	163000000	chr5	163070000	163080000
	chr2	70920000	70930000	chr2	71170000	71180000		chr5	73410000	73420000	chr5	73650000	73660000
	chr2	147680000	147690000	chr2	147840000	147850000		chr5	76520000	76530000	chr5	76790000	76800000
	chr2	32980000	32990000	chr2	33310000	33320000		chr5	96100000	96110000	chr5	96370000	96380000
	chr2	108830000	108840000	chr2	109060000	109070000		chr6	71760000	71770000	chr6	71860000	71870000
	chr2	237730000	237740000	chr2	237930000	237940000		chr6	54480000	54490000	chr6	54930000	54940000
	chr2	200110000	200120000	chr2	200310000	200320000		chr6	51150000	51160000	chr6	51390000	51400000
	chr2	19000000	19010000	chr2	19150000	19160000		chr6	1870000	1880000	chr6	2190000	2200000
	chr2	141740000	141750000	chr2	141870000	141880000		chr6	142790000	142800000	chr6	143080000	143090000
	chr2	43160000	43170000	chr2	43800000	43810000		chr6	143390000	143400000	chr6	143750000	143760000
	chr2	134100000	134110000	chr2	134310000	134320000		chr6	46450000	46460000	chr6	46740000	46750000
	chr2	43460000	43470000	chr2	43790000	43800000		chr6	69350000	69360000	chr6	69670000	69680000
	chr2	159610000	159620000	chr2	159690000	159700000		chr6	47780000	47790000	chr6	47960000	47970000
	chr2	222560000	222570000	chr2	222810000	222820000		chr6	82460000	82470000	chr6	82870000	82880000
	chr2	135230000	135240000	chr2	135470000	135480000		chr6	8980000	8990000	chr6	10430000	10440000
	chr2	66150000	66160000	chr2	66340000	66350000		chr6	128050000	128060000	chr6	128830000	128840000
	chr2	208480000	208490000	chr2	208900000	208910000		chr6	106880000	106890000	chr6	107310000	107320000
	chr2	213550000	213560000	chr2	213730000	213740000		chr6	49060000	49070000	chr6	49370000	49380000
	chr2	213540000	213550000	chr2	213620000	213630000		chr6	31860000	31870000	chr6	32150000	32160000
	chr2	45400000	45410000	chr2	45710000	45720000		chr6	45900000	45910000	chr6	46180000	46190000
	chr2	173340000	173350000	chr2	173560000	173570000		chr6	146250000	146260000	chr6	146870000	146880000
	chr2	134020000	134030000	chr2	134320000	134330000		chr6	57860000	57870000	chr6	57950000	57960000
	chr2	60200000	60210000	chr2	60370000	60380000		chr6	88110000	88120000	chr6	88250000	88260000
	chr2	60540000	60550000	chr2	60760000	60770000		chr6	100580000	100590000	chr6	100820000	100830000
	chr2	216450000	216460000	chr2	216700000	216710000		chr6	42120000	42130000	chr6	42520000	42530000
	chr2	165890000	165900000	chr2	166160000	166170000		chr6	51120000	51130000	chr6	51380000	51390000
	chr2	187990000	188000000	chr2	188300000	188310000		chr6	24230000	24240000	chr6	24390000	24400000
	chr2	169220000	169230000	chr2	169380000	169390000		chr6	75110000	75120000	chr6	75380000	75390000
	chr2	158900000	158910000	chr2	159310000	159320000		chr6	58610000	58620000	chr6	58750000	58760000
	chr2	95540000	95550000	chr2	95760000	95770000		chr6	82010000	82020000	chr6	82170000	82180000
	chr2	65150000	65160000	chr2	65370000	65380000		chr6	73330000	73340000	chr6	73510000	73520000
	chr2	169780000	169790000	chr2	170060000	170070000		chr6	124900000	124910000	chr6	125100000	125110000
	chr2	23600000	23610000	chr2	23970000	23980000		chr6	79940000	79950000	chr6	80230000	80240000
	chr2	106370000	106380000	chr2	106570000	106580000		chr7	140770000	140780000	chr7	141230000	141240000
	chr2	106410000	106420000	chr2	106670000	106680000		chr7	150830000	150840000	chr7	150910000	150920000
	chr2	151140000	151150000	chr2	151310000	151320000		chr7	129860000	129870000	chr7	130280000	130290000
	chr2	192690000	192700000	chr2	192880000	192890000		chr7	129880000	129890000	chr7	130440000	130450000
	chr2	54680000	54690000	chr2	54920000	54930000		chr7	129820000	129830000	chr7	130510000	130520000
	chr2	150060000	150070000	chr2	150420000	150430000		chr7	61760000	61770000	chr7	61910000	61920000
	chr2	120740000	120750000	chr2	120940000	120950000		chr7	111710000	111720000	chr7	112040000	112050000
	chr2	144910000	144920000	chr2	145270000	145280000		chr7	5890000	5900000	chr7	6050000	6060000
	chr2	188110000	188120000	chr2	188310000	188320000		chr7	101740000	101750000	chr7	101850000	101860000
	chr2	173950000	173960000	chr2	174220000	174230000		chr7	3340000	3350000	chr7	3940000	3950000
	chr2	98820000	98830000	chr2	98990000	99000000		chr7	102400000	102410000	chr7	102840000	102850000
	chr2	154190000	154200000	chr2	154480000	154490000		chr7	106840000	106850000	chr7	107220000	107230000
	chr2	159320000	159330000	chr2	159600000	159610000		chr7	91120000	91130000	chr7	91220000	91230000
	chr2	230300000	230310000	chr2	230560000	230570000		chr7	47920000	47930000	chr7	48150000	48160000
	chr2	149990000	150000000	chr2	150410000	150420000		chr7	30190000	30200000	chr7	30540000	30550000
	chr2	31660000	31670000	chr2	32050000	32060000		chr7	132380000	132390000	chr7	132900000	132910000
	chr2	11960000	11970000	chr2	13130000	13140000		chr7	83040000	83050000	chr7	83540000	83550000
	chr2	206190000	206200000	chr2	206530000	206540000		chr7	127770000	127780000	chr7	127960000	127970000
	chr2	171370000	171380000	chr2	171670000	171680000		chr7	19530000	19540000	chr7	19700000	19710000
	chr2	113000000	113010000	chr2	113320000	113330000		chr7	45610000	45620000	chr7	45870000	45880000
	chr2	78090000	78100000	chr2	78170000	78180000		chr7	130110000	130120000	chr7	130380000	130390000
	chr2	67770000	67780000	chr2	67870000	67880000		chr7	143840000	143850000	chr7	144120000	144130000
	chr2	199670000	199680000	chr2	199840000	199850000		chr7	64680000	64690000	chr7	64900000	64910000
	chr2	115470000	115480000	chr2	115730000	115740000		chr7	940000	950000	chr7	1020000	1030000
	chr2	45940000	45950000	chr2	46160000	46170000		chr7	46100000	46110000	chr7	46360000	46370000
	chr2	100540000	100550000	chr2	100850000	100860000		chr7	133830000	133840000	chr7	134030000	134040000
	chr2	115480000	115490000	chr2	115690000	115700000		chr7	81580000	81590000	chr7	81660000	81670000
	chr2	187240000	187250000	chr2	187320000	187330000		chr7	109860000	109870000	chr7	110080000	110090000
	chr2	76430000	76440000	chr2	76770000	76780000		chr7	96770000	96780000	chr7	97000000	97010000
	chr2	45510000	45520000	chr2	45710000	45720000		chr7	81120000	81130000	chr7	81690000	81700000
	chr2	14310000	14320000	chr2	14420000	14430000		chr7	22580000	22590000	chr7	22910000	22920000
	chr2	183030000	183040000	chr2	183440000	183450000		chr7	137850000	137860000	chr7	138220000	138230000
	chr2	226220000	226230000	chr2	226510000	226520000		chr7	144430000	144440000	chr7	144610000	144620000
	chr2	143030000	143040000	chr2	143220000	143230000		chr7	144430000	144440000	chr7	144640000	144650000
	chr2	17260000	17270000	chr2	17480000	17490000		chr7	96890000	96900000	chr7	97460000	97470000
	chr2	209270000	209280000	chr2	209450000	209460000		chr8	60270000	60280000	chr8	60740000	60750000
	chr2	223980000	223990000	chr2	224180000	224190000		chr8	61320000	61330000	chr8	61930000	61940000
	chr2	158890000	158900000	chr2	159060000	159070000		chr8	128040000	128050000	chr8	128300000	128310000
	chr2	157190000	157200000	chr2	157360000	157370000		chr8	17180000	17190000	chr8	17550000	17560000
	chr2	191970000	191980000	chr2	192370000	192380000		chr8	77280000	77290000	chr8	78050000	78060000
	chr2	206830000	206840000	chr2	207010000	207020000		chr8	70020000	70030000	chr8	70390000	70400000
	chr2	31170000	31180000	chr2	31360000	31370000		chr8	116130000	116140000	chr8	116280000	116290000
	chr2	180990000	181000000	chr2	181180000	181190000		chr8	24400000	24410000	chr8	24720000	24730000
	chr2	106540000	106550000	chr2	106690000	106700000		chr8	91010000	91020000	chr8	91950000	91960000
	chr2	205180000	205190000	chr2	205370000	205380000		chr8	114180000	114190000	chr8	114440000	114450000
	chr2	187760000	187770000	chr2	188080000	188090000		chr8	77590000	77600000	chr8	77900000	77910000
	chr2	138350000	138360000	chr2	138590000	138600000		chr8	98610000	98620000	chr8	99050000	99060000
	chr2	200190000	200200000	chr2	200340000	200350000		chr8	81520000	81530000	chr8	82150000	82160000
	chr2	221830000	221840000	chr2	222020000	222030000		chr8	123740000	123750000	chr8	124230000	124240000
	chr2	187750000	187760000	chr2	188000000	188010000		chr8	32460000	32470000	chr8	32770000	32780000
	chr2	176320000	176330000	chr2	176930000	176940000		chr8	31620000	31630000	chr8	31760000	31770000
	chr2	19570000	19580000	chr2	19700000	19710000		chr8	53480000	53490000	chr8	53850000	53860000
	chr2	78040000	78050000	chr2	78190000	78200000		chr8	116420000	116430000	chr8	116640000	116650000
	chr2	219980000	219990000	chr2	220160000	220170000		chr8	22520000	22530000	chr8	22840000	22850000
	chr2	119250000	119260000	chr2	119440000	119450000		chr8	90170000	90180000	chr8	90250000	90260000
	chr2	123760000	123770000	chr2	123970000	123980000		chr8	16330000	16340000	chr8	16620000	16630000
	chr2	123720000	123730000	chr2	123970000	123980000		chr8	137490000	137500000	chr8	137720000	137730000
	chr2	171220000	171230000	chr2	171490000	171500000		chr8	32420000	32430000	chr8	32860000	32870000
	chr2	212600000	212610000	chr2	212890000	212900000		chr8	116570000	116580000	chr8	116670000	116680000
	chr2	45290000	45300000	chr2	45680000	45690000		chr8	42400000	42410000	chr8	42680000	42690000
	chr3	118040000	118050000	chr3	118330000	118340000		chr8	26720000	26730000	chr8	27050000	27060000
	chr3	152300000	152310000	chr3	152650000	152660000		chr9	2620000	2630000	chr9	2820000	2830000
	chr3	110800000	110810000	chr3	111020000	111030000		chr9	21330000	21340000	chr9	21790000	21800000
	chr3	143680000	143690000	chr3	144010000	144020000		chr9	21320000	21330000	chr9	21450000	21460000
	chr3	70780000	70790000	chr3	71060000	71070000		chr9	21430000	21440000	chr9	21790000	21800000
	chr3	126250000	126260000	chr3	127170000	127180000		chr9	9370000	9380000	chr9	9550000	9560000
	chr3	126400000	126410000	chr3	126790000	126800000		chr9	115140000	115150000	chr9	115560000	115570000
	chr3	54910000	54920000	chr3	55760000	55770000		chr9	27030000	27040000	chr9	27540000	27550000
	chr3	169080000	169090000	chr3	169380000	169390000		chr9	17110000	17120000	chr9	17400000	17410000
	chr3	177240000	177250000	chr3	177480000	177490000		chr9	86450000	86460000	chr9	86870000	86880000
	chr3	176370000	176380000	chr3	176650000	176660000		chr9	21990000	22000000	chr9	22240000	22250000
	chr3	155070000	155080000	chr3	155320000	155330000		chr9	32590000	32600000	chr9	32840000	32850000
	chr3	168760000	168770000	chr3	169390000	169400000		chr9	81940000	81950000	chr9	82160000	82170000
	chr3	40030000	40040000	chr3	40190000	40200000		chr9	22300000	22310000	chr9	22450000	22460000
	chr3	40030000	40040000	chr3	40140000	40150000		chr9	81210000	81220000	chr9	81730000	81740000
	chr3	188990000	189000000	chr3	189320000	189330000		chr9	90690000	90700000	chr9	91130000	91140000
	chr3	105420000	105430000	chr3	105850000	105860000		chr9	80380000	80390000	chr9	80810000	80820000
	chr3	105390000	105400000	chr3	106330000	106340000		chr9	25800000	25810000	chr9	25920000	25930000
	chr3	65770000	65780000	chr3	66010000	66020000		chr9	131890000	131900000	chr9	132020000	132030000
	chr3	153150000	153160000	chr3	153480000	153490000		chr9	13540000	13550000	chr9	13640000	13650000
	chr3	55260000	55270000	chr3	55460000	55470000		chr9	23630000	23640000	chr9	23820000	23830000
	chr3	142830000	142840000	chr3	142990000	143000000		chr9	134230000	134240000	chr9	134450000	134460000
	chr3	142770000	142780000	chr3	143380000	143390000		chr9	109340000	109350000	chr9	109620000	109630000
	chr3	19100000	19110000	chr3	19910000	19920000		chr9	81910000	81920000	chr9	82170000	82180000
	chr3	27750000	27760000	chr3	27970000	27980000		chr9	13500000	13510000	chr9	13640000	13650000
	chr3	38290000	38300000	chr3	38510000	38520000		chr9	112260000	112270000	chr9	112400000	112410000
	chr3	63560000	63570000	chr3	63770000	63780000		chr9	115280000	115290000	chr9	115460000	115470000
	chr3	18460000	18470000	chr3	18790000	18800000		chr9	17110000	17120000	chr9	17320000	17330000
	chr3	18480000	18490000	chr3	18620000	18630000		chr9	21190000	21200000	chr9	21440000	21450000
	chr3	43810000	43820000	chr3	44010000	44020000		chr9	37140000	37150000	chr9	37390000	37400000
	chr3	152220000	152230000	chr3	152410000	152420000		chr9	28920000	28930000	chr9	29200000	29210000
	chr3	174590000	174600000	chr3	174870000	174880000		chr9	5080000	5090000	chr9	5420000	5430000
	chr3	169210000	169220000	chr3	169380000	169390000		chr9	21390000	21400000	chr9	21790000	21800000
	chr3	66630000	66640000	chr3	66850000	66860000		chr9	21800000	21810000	chr9	22230000	22240000
	chr3	30230000	30240000	chr3	30790000	30800000		chrX	128130000	128140000	chrX	128210000	128220000
	chr3	127930000	127940000	chr3	128320000	128330000		chrX	106130000	106140000	chrX	106670000	106680000
	chr3	158750000	158760000	chr3	158960000	158970000		chrX	46540000	46550000	chrX	46890000	46900000
	chr3	195280000	195290000	chr3	195560000	195570000		chrX	54670000	54680000	chrX	55080000	55090000
	chr3	17940000	17950000	chr3	18400000	18410000		chrX	54690000	54700000	chrX	54900000	54910000
	chr3	123820000	123830000	chr3	124190000	124200000		chrX	118360000	118370000	chrX	118630000	118640000
	chr3	8370000	8380000	chr3	8660000	8670000		chrX	47940000	47950000	chrX	48420000	48430000
	chr3	24990000	25000000	chr3	25640000	25650000		chrX	149130000	149140000	chrX	149370000	149380000
	chr3	81960000	81970000	chr3	82190000	82200000		chrX	17760000	17770000	chrX	18220000	18230000
	chr3	178160000	178170000	chr3	178550000	178560000		chrX	36700000	36710000	chrX	36860000	36870000
	chr3	172580000	172590000	chr3	172740000	172750000		chrX	51630000	51640000	chrX	51760000	51770000
	chr3	182230000	182240000	chr3	182390000	182400000		chrX	122960000	122970000	chrX	123160000	123170000
	chr3	19410000	19420000	chr3	19570000	19580000		chrX	142750000	142760000	chrX	143300000	143310000
	chr3	193360000	193370000	chr3	194160000	194170000		chrX	154460000	154470000	chrX	155040000	155050000
	chr3	86910000	86920000	chr3	87120000	87130000		chrX	50030000	50040000	chrX	50320000	50330000
	chr3	187690000	187700000	chr3	187880000	187890000		chrX	154630000	154640000	chrX	155040000	155050000
	chr3	187640000	187650000	chr3	187870000	187880000		chrX	32550000	32560000	chrX	32700000	32710000
	chr3	24220000	24230000	chr3	24300000	24310000		chrX	32550000	32560000	chrX	33350000	33360000
	chr3	180530000	180540000	chr3	180880000	180890000		chrX	45370000	45380000	chrX	45670000	45680000
	chr3	107140000	107150000	chr3	107340000	107350000		chrX	104450000	104460000	chrX	104790000	104800000
	chr3	169180000	169190000	chr3	169370000	169380000		chrX	73110000	73120000	chrX	73570000	73580000
	chr3	75880000	75890000	chr3	76120000	76130000		chrX	10880000	10890000	chrX	11110000	11120000
	chr3	118600000	118610000	chr3	118970000	118980000		chrX	31280000	31290000	chrX	31670000	31680000
	chr3	53400000	53410000	chr3	53900000	53910000		chrX	149620000	149630000	chrX	149830000	149840000
	chr3	36950000	36960000	chr3	37040000	37050000		chrX	98580000	98590000	chrX	98670000	98680000
	chr3	3840000	3850000	chr3	4030000	4040000		chrX	126040000	126050000	chrX	126130000	126140000
	chr3	31810000	31820000	chr3	32180000	32190000		chrX	34650000	34660000	chrX	35110000	35120000
	chr3	25190000	25200000	chr3	25620000	25630000		chrX	35910000	35920000	chrX	36700000	36710000
	chr3	143160000	143170000	chr3	143310000	143320000		chrX	115330000	115340000	chrX	115630000	115640000
	chr3	19410000	19420000	chr3	19500000	19510000		chrX	105210000	105220000	chrX	105450000	105460000
	chr3	75420000	75430000	chr3	75650000	75660000		chrX	137510000	137520000	chrX	137810000	137820000
	chr3	83270000	83280000	chr3	83570000	83580000		chrX	151430000	151440000	chrX	151790000	151800000
	chr3	53400000	53410000	chr3	53480000	53490000		chrX	104450000	104460000	chrX	104850000	104860000
	chr3	177890000	177900000	chr3	178020000	178030000		chrX	143130000	143140000	chrX	143340000	143350000
	chr3	83460000	83470000	chr3	83550000	83560000		chrX	84690000	84700000	chrX	84800000	84810000
	chr3	154280000	154290000	chr3	154420000	154430000		chrX	113850000	113860000	chrX	114010000	114020000
	chr3	64530000	64540000	chr3	64670000	64680000		chrX	48540000	48550000	chrX	48760000	48770000
	chr3	43970000	43980000	chr3	44230000	44240000		chrX	149650000	149660000	chrX	149890000	149900000
	chr3	17940000	17950000	chr3	18380000	18390000		chrX	65700000	65710000	chrX	65950000	65960000
	chr3	7790000	7800000	chr3	8020000	8030000		chrX	10160000	10170000	chrX	10420000	10430000
	chr3	175520000	175530000	chr3	175650000	175660000		chrX	150370000	150380000	chrX	150650000	150660000
	chr3	143960000	143970000	chr3	144140000	144150000		chrX	154620000	154630000	chrX	154960000	154970000
	chr3	130770000	130780000	chr3	130930000	130940000		chrX	151370000	151380000	chrX	151790000	151800000
	chr3	118070000	118080000	chr3	118340000	118350000		chrX	17250000	17260000	chrX	17730000	17740000
	chr3	98880000	98890000	chr3	99090000	99100000		chrX	29440000	29450000	chrX	29920000	29930000
	chr3	27740000	27750000	chr3	27820000	27830000		chrX	71460000	71470000	chrX	71950000	71960000
	chr3	32360000	32370000	chr3	32500000	32510000		chrX	45630000	45640000	chrX	46230000	46240000
	chr3	165360000	165370000	chr3	165550000	165560000		chr10	52060000	52070000	chr10	52370000	52380000
	chr3	176470000	176480000	chr3	176650000	176660000		chr10	110000000	110010000	chr10	110110000	110120000
	chr3	170120000	170130000	chr3	170310000	170320000		chr10	14540000	14550000	chr10	14990000	15000000
	chr3	175700000	175710000	chr3	175980000	175990000		chr10	78010000	78020000	chr10	78290000	78300000
	chr3	191790000	191800000	chr3	192150000	192160000		chr11	101420000	101430000	chr11	101700000	101710000
	chr3	136830000	136840000	chr3	137050000	137060000		chr12	26270000	26280000	chr12	26850000	26860000
	chr3	104860000	104870000	chr3	105070000	105080000		chr12	66820000	66830000	chr12	67080000	67090000
	chr3	181220000	181230000	chr3	181410000	181420000		chr12	58970000	58980000	chr12	59090000	59100000
	chr3	90140000	90150000	chr3	90220000	90230000		chr12	57240000	57250000	chr12	57440000	57450000
	chr3	63040000	63050000	chr3	63220000	63230000		chr12	34410000	34420000	chr12	34770000	34780000
	chr3	63340000	63350000	chr3	63720000	63730000		chr13	76440000	76450000	chr13	77550000	77560000
	chr3	178330000	178340000	chr3	178670000	178680000		chr14	64270000	64280000	chr14	64710000	64720000
	chr3	154210000	154220000	chr3	154440000	154450000		chr14	71780000	71790000	chr14	72000000	72010000
	chr3	156260000	156270000	chr3	156600000	156610000		chr14	32030000	32040000	chr14	32530000	32540000
	chr3	192900000	192910000	chr3	193280000	193290000		chr15	56500000	56510000	chr15	56720000	56730000
	chr3	104770000	104780000	chr3	105070000	105080000		chr15	44510000	44520000	chr15	44710000	44720000
	chr3	118590000	118600000	chr3	118680000	118690000		chr16	50120000	50130000	chr16	50370000	50380000
	chr3	85300000	85310000	chr3	85400000	85410000		chr16	5810000	5820000	chr16	6040000	6050000
	chr3	106220000	106230000	chr3	106320000	106330000		chr17	78400000	78410000	chr17	78810000	78820000
	chr3	160660000	160670000	chr3	160760000	160770000		chr17	57340000	57350000	chr17	57520000	57530000
	chr3	110670000	110680000	chr3	110790000	110800000		chr18	34010000	34020000	chr18	34150000	34160000
	chr3	115280000	115290000	chr3	115400000	115410000		chr18	34070000	34080000	chr18	34220000	34230000
	chr3	192780000	192790000	chr3	192930000	192940000		chr19	39460000	39470000	chr19	39740000	39750000
	chr3	88980000	88990000	chr3	89140000	89150000		chr19	36720000	36730000	chr19	36970000	36980000
	chr3	168230000	168240000	chr3	168400000	168410000		chr19	10790000	10800000	chr19	10960000	10970000
	chr3	85150000	85160000	chr3	85340000	85350000		chr1	16700000	16710000	chr1	16820000	16830000
	chr3	120520000	120530000	chr3	120710000	120720000		chr1	223990000	224000000	chr1	224250000	224260000
	chr3	194710000	194720000	chr3	194910000	194920000		chr1	203470000	203480000	chr1	203800000	203810000
	chr3	129850000	129860000	chr3	130060000	130070000		chr1	7400000	7410000	chr1	7500000	7510000
	chr3	13460000	13470000	chr3	13680000	13690000		chr1	2980000	2990000	chr1	3240000	3250000
	chr3	178300000	178310000	chr3	178520000	178530000		chr1	153960000	153970000	chr1	154160000	154170000
	chr4	79970000	79980000	chr4	80120000	80130000		chr1	72070000	72080000	chr1	72190000	72200000
	chr4	53100000	53110000	chr4	53870000	53880000		chr1	218510000	218520000	chr1	218970000	218980000
	chr4	53110000	53120000	chr4	53300000	53310000		chr1	11360000	11370000	chr1	11640000	11650000
	chr4	113000000	113010000	chr4	113440000	113450000		chr1	198050000	198060000	chr1	198380000	198390000
	chr4	156890000	156900000	chr4	157070000	157080000		chr1	184240000	184250000	chr1	184630000	184640000
	chr4	177300000	177310000	chr4	177650000	177660000		chr1	229970000	229980000	chr1	230440000	230450000
	chr4	116140000	116150000	chr4	116420000	116430000		chr20	8300000	8310000	chr20	8700000	8710000
	chr4	168810000	168820000	chr4	169000000	169010000		chr21	39070000	39080000	chr21	39580000	39590000
	chr4	179980000	179990000	chr4	180220000	180230000		chr21	41240000	41250000	chr21	41430000	41440000
	chr4	167660000	167670000	chr4	167920000	167930000		chr21	16440000	16450000	chr21	16770000	16780000
	chr4	168550000	168560000	chr4	168970000	168980000		chr22	20010000	20020000	chr22	20090000	20100000
	chr4	44920000	44930000	chr4	45280000	45290000		chr2	57010000	57020000	chr2	57740000	57750000
	chr4	156590000	156600000	chr4	156680000	156690000		chr2	238030000	238040000	chr2	238360000	238370000
	chr4	140570000	140580000	chr4	140930000	140940000		chr2	235600000	235610000	chr2	235760000	235770000
	chr4	40140000	40150000	chr4	40420000	40430000		chr2	192140000	192150000	chr2	192370000	192380000
	chr4	82080000	82090000	chr4	82260000	82270000		chr2	71370000	71380000	chr2	71620000	71630000
	chr4	89640000	89650000	chr4	89940000	89950000		chr2	48400000	48410000	chr2	48520000	48530000
	chr4	143440000	143450000	chr4	143640000	143650000		chr2	225260000	225270000	chr2	225490000	225500000
	chr4	173780000	173790000	chr4	173930000	173940000		chr2	170410000	170420000	chr2	170660000	170670000
	chr4	90950000	90960000	chr4	91110000	91120000		chr2	242500000	242510000	chr2	242670000	242680000
	chr4	163100000	163110000	chr4	163370000	163380000		chr2	172570000	172580000	chr2	172720000	172730000
	chr4	35160000	35170000	chr4	35400000	35410000		chr2	183040000	183050000	chr2	183450000	183460000
	chr4	54060000	54070000	chr4	54780000	54790000		chr2	161360000	161370000	chr2	161700000	161710000
	chr4	171100000	171110000	chr4	171290000	171300000		chr2	57460000	57470000	chr2	57710000	57720000
	chr4	171050000	171060000	chr4	171290000	171300000		chr2	195170000	195180000	chr2	195350000	195360000
	chr4	125260000	125270000	chr4	125860000	125870000		chr2	42320000	42330000	chr2	42590000	42600000
	chr4	75130000	75140000	chr4	75600000	75610000		chr2	239270000	239280000	chr2	239600000	239610000
	chr4	130600000	130610000	chr4	130810000	130820000		chr2	56490000	56500000	chr2	56960000	56970000
	chr4	26430000	26440000	chr4	26860000	26870000		chr3	159480000	159490000	chr3	159720000	159730000
	chr4	66760000	66770000	chr4	67020000	67030000		chr3	61690000	61700000	chr3	61800000	61810000
	chr4	148160000	148170000	chr4	148500000	148510000		chr3	141790000	141800000	chr3	142010000	142020000
	chr4	121740000	121750000	chr4	121980000	121990000		chr3	112360000	112370000	chr3	112640000	112650000
	chr4	48180000	48190000	chr4	48470000	48480000		chr4	81300000	81310000	chr4	81630000	81640000
	chr4	173600000	173610000	chr4	173730000	173740000		chr4	186080000	186090000	chr4	186290000	186300000
	chr4	149740000	149750000	chr4	149980000	149990000		chr4	44970000	44980000	chr4	45090000	45100000
	chr4	157090000	157100000	chr4	157590000	157600000		chr4	118980000	118990000	chr4	119100000	119110000
	chr4	157070000	157080000	chr4	157370000	157380000		chr4	114800000	114810000	chr4	114990000	115000000
	chr4	148100000	148110000	chr4	148390000	148400000		chr4	165170000	165180000	chr4	165650000	165660000
	chr4	81280000	81290000	chr4	81800000	81810000		chr4	151350000	151360000	chr4	151620000	151630000
	chr4	124270000	124280000	chr4	125030000	125040000		chr4	123120000	123130000	chr4	123490000	123500000
	chr4	160120000	160130000	chr4	160290000	160300000		chr4	128740000	128750000	chr4	128970000	128980000
	chr4	144280000	144290000	chr4	144440000	144450000		chr4	121500000	121510000	chr4	121740000	121750000
	chr4	77350000	77360000	chr4	77640000	77650000		chr4	24590000	24600000	chr4	24910000	24920000
	chr4	56210000	56220000	chr4	56590000	56600000		chr5	111200000	111210000	chr5	111310000	111320000
	chr4	82340000	82350000	chr4	82510000	82520000		chr5	164450000	164460000	chr5	164630000	164640000
	chr4	114880000	114890000	chr4	115100000	115110000		chr6	106270000	106280000	chr6	106520000	106530000
	chr4	114800000	114810000	chr4	115280000	115290000		chr6	95870000	95880000	chr6	96090000	96100000
	chr4	109760000	109770000	chr4	110010000	110020000		chr6	126400000	126410000	chr6	126640000	126650000
	chr4	81390000	81400000	chr4	81960000	81970000		chr7	129870000	129880000	chr7	130400000	130410000
	chr4	156360000	156370000	chr4	156590000	156600000		chr8	33220000	33230000	chr8	33310000	33320000
	chr4	112550000	112560000	chr4	112960000	112970000		chr9	127180000	127190000	chr9	127480000	127490000
	chr4	88070000	88080000	chr4	88370000	88380000		chr9	107670000	107680000	chr9	108170000	108180000
	chr4	69150000	69160000	chr4	69340000	69350000		chr9	134970000	134980000	chr9	135090000	135100000
	chr4	69920000	69930000	chr4	70470000	70480000		chr9	22030000	22040000	chr9	22240000	22250000
	chr4	90390000	90400000	chr4	90810000	90820000		chr9	17320000	17330000	chr9	17430000	17440000
	chr4	90360000	90370000	chr4	90810000	90820000		chr9	23750000	23760000	chr9	23830000	23840000
	chr4	90350000	90360000	chr4	90500000	90510000		chr9	21320000	21330000	chr9	21410000	21420000
	chr4	55260000	55270000	chr4	55430000	55440000		chrX	90660000	90670000	chrX	90750000	90760000
	chr4	40470000	40480000	chr4	40710000	40720000		chrX	40590000	40600000	chrX	40960000	40970000
	chr4	84580000	84590000	chr4	84840000	84850000		chrX	154520000	154530000	chrX	155070000	155080000
	chr4	110510000	110520000	chr4	110900000	110910000		chr10	94850000	94860000	chr10	95280000	95290000
	chr4	79870000	79880000	chr4	81120000	81130000		chr10	21140000	21150000	chr10	21530000	21540000
	chr4	146870000	146880000	chr4	147080000	147090000		chr10	91890000	91900000	chr10	92350000	92360000
	chr4	146870000	146880000	chr4	147120000	147130000		chr10	35420000	35430000	chr10	35590000	35600000
	chr4	41260000	41270000	chr4	41720000	41730000		chr10	76390000	76400000	chr10	76850000	76860000
	chr4	41280000	41290000	chr4	41440000	41450000		chr10	130060000	130070000	chr10	130640000	130650000
	chr4	41250000	41260000	chr4	41890000	41900000		chr10	63640000	63650000	chr10	64000000	64010000
	chr4	22910000	22920000	chr4	23130000	23140000		chr10	106420000	106430000	chr10	106680000	106690000
	chr4	107440000	107450000	chr4	107710000	107720000		chr10	70220000	70230000	chr10	70650000	70660000
	chr4	167540000	167550000	chr4	167720000	167730000		chr10	122700000	122710000	chr10	123240000	123250000
	chr4	190230000	190240000	chr4	190450000	190460000		chr10	52030000	52040000	chr10	52390000	52400000
	chr4	69510000	69520000	chr4	69720000	69730000		chr10	122910000	122920000	chr10	123390000	123400000
	chr4	145100000	145110000	chr4	145270000	145280000		chr10	75280000	75290000	chr10	75480000	75490000
	chr4	145090000	145100000	chr4	145510000	145520000		chr10	101490000	101500000	chr10	101800000	101810000
	chr4	166570000	166580000	chr4	167000000	167010000		chr10	72310000	72320000	chr10	72620000	72630000
	chr4	114320000	114330000	chr4	114590000	114600000		chr10	102200000	102210000	chr10	102640000	102650000
	chr4	108960000	108970000	chr4	109460000	109470000		chr10	25710000	25720000	chr10	25920000	25930000
	chr4	37430000	37440000	chr4	37680000	37690000		chr10	8530000	8540000	chr10	8910000	8920000
	chr4	2760000	2770000	chr4	3050000	3060000		chr10	27440000	27450000	chr10	27640000	27650000
	chr4	120990000	121000000	chr4	122040000	122050000		chr10	122850000	122860000	chr10	123250000	123260000
	chr4	135380000	135390000	chr4	135820000	135830000		chr10	122870000	122880000	chr10	123360000	123370000
	chr4	38170000	38180000	chr4	38530000	38540000		chr10	25390000	25400000	chr10	25990000	26000000
	chr4	38180000	38190000	chr4	38420000	38430000		chr10	98380000	98390000	chr10	98780000	98790000
	chr4	130080000	130090000	chr4	130240000	130250000		chr10	106060000	106070000	chr10	106380000	106390000
	chr4	23750000	23760000	chr4	24030000	24040000		chr10	114250000	114260000	chr10	115140000	115150000
	chr4	23780000	23790000	chr4	24410000	24420000		chr10	8650000	8660000	chr10	8890000	8900000
	chr4	70230000	70240000	chr4	70470000	70480000		chr10	79490000	79500000	chr10	79780000	79790000
	chr4	89200000	89210000	chr4	89420000	89430000		chr10	112250000	112260000	chr10	112330000	112340000
	chr4	120020000	120030000	chr4	120190000	120200000		chr10	20100000	20110000	chr10	20180000	20190000
	chr4	148300000	148310000	chr4	148510000	148520000		chr10	133330000	133340000	chr10	133490000	133500000
	chr4	81630000	81640000	chr4	81950000	81960000		chr10	72650000	72660000	chr10	72740000	72750000
	chr4	88580000	88590000	chr4	88880000	88890000		chr10	117450000	117460000	chr10	118150000	118160000
	chr4	49030000	49040000	chr4	49240000	49250000		chr10	107770000	107780000	chr10	107910000	107920000
	chr4	90000	100000	chr4	350000	360000		chr10	126840000	126850000	chr10	127140000	127150000
	chr4	135590000	135600000	chr4	135680000	135690000		chr10	119290000	119300000	chr10	119620000	119630000
	chr4	158150000	158160000	chr4	158620000	158630000		chr10	6710000	6720000	chr10	6960000	6970000
	chr4	97110000	97120000	chr4	97190000	97200000		chr10	23510000	23520000	chr10	23810000	23820000
	chr4	104150000	104160000	chr4	104600000	104610000		chr10	5840000	5850000	chr10	6010000	6020000
	chr4	172830000	172840000	chr4	173110000	173120000		chr10	127670000	127680000	chr10	128030000	128040000
	chr4	155930000	155940000	chr4	156190000	156200000		chr10	10660000	10670000	chr10	10980000	10990000
	chr4	159280000	159290000	chr4	159540000	159550000		chr10	16870000	16880000	chr10	17180000	17190000
	chr4	118770000	118780000	chr4	118900000	118910000		chr10	35920000	35930000	chr10	36290000	36300000
	chr4	123310000	123320000	chr4	123490000	123500000		chr10	86640000	86650000	chr10	86830000	86840000
	chr4	89670000	89680000	chr4	89950000	89960000		chr10	62210000	62220000	chr10	62460000	62470000
	chr4	171510000	171520000	chr4	171720000	171730000		chr10	131670000	131680000	chr10	131930000	131940000
	chr4	28380000	28390000	chr4	28480000	28490000		chr10	122930000	122940000	chr10	123250000	123260000
	chr4	158730000	158740000	chr4	158890000	158900000		chr10	133260000	133270000	chr10	133630000	133640000
	chr4	114310000	114320000	chr4	114630000	114640000		chr10	126850000	126860000	chr10	127230000	127240000
	chr4	71270000	71280000	chr4	71410000	71420000		chr11	76060000	76070000	chr11	76240000	76250000
	chr4	78970000	78980000	chr4	79230000	79240000		chr11	1120000	1130000	chr11	1530000	1540000
	chr4	75060000	75070000	chr4	75260000	75270000		chr11	57690000	57700000	chr11	58260000	58270000
	chr4	90670000	90680000	chr4	90820000	90830000		chr11	57580000	57590000	chr11	57760000	57770000
	chr4	108270000	108280000	chr4	108420000	108430000		chr11	57610000	57620000	chr11	58050000	58060000
	chr4	55640000	55650000	chr4	55800000	55810000		chr11	9880000	9890000	chr11	10030000	10040000
	chr4	76490000	76500000	chr4	76710000	76720000		chr11	18260000	18270000	chr11	18670000	18680000
	chr4	184880000	184890000	chr4	185060000	185070000		chr11	18350000	18360000	chr11	18530000	18540000
	chr4	188240000	188250000	chr4	188480000	188490000		chr11	38830000	38840000	chr11	39380000	39390000
	chr4	143930000	143940000	chr4	144090000	144100000		chr11	32980000	32990000	chr11	33360000	33370000
	chr4	13800000	13810000	chr4	14020000	14030000		chr11	9640000	9650000	chr11	10330000	10340000
	chr4	177290000	177300000	chr4	178020000	178030000		chr11	120800000	120810000	chr11	121040000	121050000
	chr4	101840000	101850000	chr4	102030000	102040000		chr11	12350000	12360000	chr11	12690000	12700000
	chr4	103210000	103220000	chr4	103340000	103350000		chr11	12350000	12360000	chr11	12830000	12840000
	chr4	188290000	188300000	chr4	188510000	188520000		chr11	10140000	10150000	chr11	10320000	10330000
	chr4	168700000	168710000	chr4	168990000	169000000		chr11	108090000	108100000	chr11	108370000	108380000
	chr4	44920000	44930000	chr4	45400000	45410000		chr11	68870000	68880000	chr11	69310000	69320000
	chr4	94720000	94730000	chr4	94920000	94930000		chr11	132950000	132960000	chr11	133680000	133690000
	chr4	155260000	155270000	chr4	155400000	155410000		chr11	70650000	70660000	chr11	71070000	71080000
	chr4	14640000	14650000	chr4	14830000	14840000		chr11	61270000	61280000	chr11	61510000	61520000
	chr4	175060000	175070000	chr4	175230000	175240000		chr11	120370000	120380000	chr11	120670000	120680000
	chr4	34760000	34770000	chr4	35110000	35120000		chr11	104480000	104490000	chr11	104760000	104770000
	chr4	157290000	157300000	chr4	157590000	157600000		chr11	110310000	110320000	chr11	111090000	111100000
	chr4	135400000	135410000	chr4	135590000	135600000		chr11	65020000	65030000	chr11	65280000	65290000
	chr4	32430000	32440000	chr4	32780000	32790000		chr11	31410000	31420000	chr11	31900000	31910000
	chr4	162920000	162930000	chr4	163060000	163070000		chr11	33550000	33560000	chr11	33750000	33760000
	chr4	104560000	104570000	chr4	104820000	104830000		chr11	1320000	1330000	chr11	1530000	1540000
	chr4	35440000	35450000	chr4	35680000	35690000		chr11	112170000	112180000	chr11	112670000	112680000
	chr4	47850000	47860000	chr4	48080000	48090000		chr11	28600000	28610000	chr11	29170000	29180000
	chr4	25080000	25090000	chr4	25350000	25360000		chr11	123930000	123940000	chr11	124450000	124460000
	chr4	176520000	176530000	chr4	176800000	176810000		chr11	35720000	35730000	chr11	36280000	36290000
	chr4	108990000	109000000	chr4	109180000	109190000		chr11	10020000	10030000	chr11	10210000	10220000
	chr4	133620000	133630000	chr4	133740000	133750000		chr11	107450000	107460000	chr11	107760000	107770000
	chr4	35260000	35270000	chr4	35390000	35400000		chr11	45980000	45990000	chr11	46330000	46340000
	chr4	168410000	168420000	chr4	168540000	168550000		chr11	37670000	37680000	chr11	38800000	38810000
	chr4	91870000	91880000	chr4	92010000	92020000		chr11	67160000	67170000	chr11	67370000	67380000
	chr4	21200000	21210000	chr4	21350000	21360000		chr11	78350000	78360000	chr11	78770000	78780000
	chr4	79280000	79290000	chr4	79430000	79440000		chr11	113170000	113180000	chr11	113590000	113600000
	chr4	53860000	53870000	chr4	54020000	54030000		chr11	9780000	9790000	chr11	10080000	10090000
	chr4	87980000	87990000	chr4	88150000	88160000		chr11	27720000	27730000	chr11	28570000	28580000
	chr4	66760000	66770000	chr4	66950000	66960000		chr11	126580000	126590000	chr11	126940000	126950000
	chr4	79230000	79240000	chr4	79430000	79440000		chr11	16450000	16460000	chr11	16630000	16640000
	chr4	178600000	178610000	chr4	178800000	178810000		chr11	7140000	7150000	chr11	7300000	7310000
	chr4	86330000	86340000	chr4	86550000	86560000		chr11	33890000	33900000	chr11	34070000	34080000
	chr4	165430000	165440000	chr4	165650000	165660000		chr11	9790000	9800000	chr11	9930000	9940000
	chr4	79960000	79970000	chr4	80200000	80210000		chr11	66460000	66470000	chr11	66660000	66670000
	chr4	94710000	94720000	chr4	94950000	94960000		chr11	10070000	10080000	chr11	10320000	10330000
	chr4	147480000	147490000	chr4	147790000	147800000		chr11	103180000	103190000	chr11	103390000	103400000
	chr4	78970000	78980000	chr4	79320000	79330000		chr11	83930000	83940000	chr11	84020000	84030000
	chr4	79060000	79070000	chr4	79430000	79440000		chr11	22550000	22560000	chr11	22750000	22760000
	chr4	79940000	79950000	chr4	80810000	80820000		chr11	131110000	131120000	chr11	131460000	131470000
	chr5	78310000	78320000	chr5	78630000	78640000		chr11	86820000	86830000	chr11	87000000	87010000
	chr5	86710000	86720000	chr5	87990000	88000000		chr11	28770000	28780000	chr11	28960000	28970000
	chr5	86730000	86740000	chr5	87060000	87070000		chr11	134450000	134460000	chr11	134810000	134820000
	chr5	131980000	131990000	chr5	132210000	132220000		chr11	32070000	32080000	chr11	32290000	32300000
	chr5	179550000	179560000	chr5	179730000	179740000		chr11	133000000	133010000	chr11	133680000	133690000
	chr5	81650000	81660000	chr5	82710000	82720000		chr11	37470000	37480000	chr11	37590000	37600000
	chr5	44860000	44870000	chr5	45040000	45050000		chr11	10000000	10010000	chr11	10130000	10140000
	chr5	116790000	116800000	chr5	117040000	117050000		chr11	84090000	84100000	chr11	84250000	84260000
	chr5	40990000	41000000	chr5	41240000	41250000		chr11	108090000	108100000	chr11	108270000	108280000
	chr5	106180000	106190000	chr5	106270000	106280000		chr11	62710000	62720000	chr11	62980000	62990000
	chr5	126200000	126210000	chr5	126620000	126630000		chr12	69980000	69990000	chr12	70130000	70140000
	chr5	49650000	49660000	chr5	50030000	50040000		chr12	132230000	132240000	chr12	132470000	132480000
	chr5	88030000	88040000	chr5	88320000	88330000		chr12	90100000	90110000	chr12	90480000	90490000
	chr5	136150000	136160000	chr5	136420000	136430000		chr12	110880000	110890000	chr12	111260000	111270000
	chr5	148220000	148230000	chr5	148480000	148490000		chr12	38760000	38770000	chr12	39290000	39300000
	chr5	49750000	49760000	chr5	49950000	49960000		chr12	51810000	51820000	chr12	52170000	52180000
	chr5	74630000	74640000	chr5	74790000	74800000		chr12	105840000	105850000	chr12	106100000	106110000
	chr5	23820000	23830000	chr5	24040000	24050000		chr12	121490000	121500000	chr12	121870000	121880000
	chr5	23830000	23840000	chr5	24090000	24100000		chr12	52900000	52910000	chr12	53130000	53140000
	chr5	113240000	113250000	chr5	113400000	113410000		chr12	71110000	71120000	chr12	71390000	71400000
	chr5	7060000	7070000	chr5	7490000	7500000		chr12	121080000	121090000	chr12	121530000	121540000
	chr5	173160000	173170000	chr5	173400000	173410000		chr12	58920000	58930000	chr12	59520000	59530000
	chr5	156090000	156100000	chr5	156560000	156570000		chr12	46460000	46470000	chr12	46730000	46740000
	chr5	156090000	156100000	chr5	156240000	156250000		chr12	47440000	47450000	chr12	48080000	48090000
	chr5	156090000	156100000	chr5	156450000	156460000		chr12	123010000	123020000	chr12	123230000	123240000
	chr5	67260000	67270000	chr5	67520000	67530000		chr12	85610000	85620000	chr12	85840000	85850000
	chr5	67780000	67790000	chr5	68260000	68270000		chr12	46140000	46150000	chr12	46300000	46310000
	chr5	130200000	130210000	chr5	130410000	130420000		chr12	93230000	93240000	chr12	93470000	93480000
	chr5	73410000	73420000	chr5	73930000	73940000		chr12	102700000	102710000	chr12	102880000	102890000
	chr5	133520000	133530000	chr5	133920000	133930000		chr12	56710000	56720000	chr12	56980000	56990000
	chr5	156280000	156290000	chr5	156440000	156450000		chr12	75910000	75920000	chr12	76200000	76210000
	chr5	76840000	76850000	chr5	77260000	77270000		chr12	75920000	75930000	chr12	76840000	76850000
	chr5	23350000	23360000	chr5	23780000	23790000		chr12	102480000	102490000	chr12	102880000	102890000
	chr5	66540000	66550000	chr5	66920000	66930000		chr12	77040000	77050000	chr12	77400000	77410000
	chr5	113450000	113460000	chr5	113600000	113610000		chr12	67750000	67760000	chr12	68430000	68440000
	chr5	168810000	168820000	chr5	168960000	168970000		chr12	46950000	46960000	chr12	47320000	47330000
	chr5	43730000	43740000	chr5	44770000	44780000		chr12	46760000	46770000	chr12	47330000	47340000
	chr5	66170000	66180000	chr5	66430000	66440000		chr12	70620000	70630000	chr12	70970000	70980000
	chr5	145910000	145920000	chr5	146450000	146460000		chr12	42500000	42510000	chr12	42790000	42800000
	chr5	39950000	39960000	chr5	40360000	40370000		chr12	10490000	10500000	chr12	10810000	10820000
	chr5	121650000	121660000	chr5	121810000	121820000		chr12	90180000	90190000	chr12	90470000	90480000
	chr5	67220000	67230000	chr5	67520000	67530000		chr12	70700000	70710000	chr12	70970000	70980000
	chr5	57340000	57350000	chr5	57750000	57760000		chr12	11780000	11790000	chr12	12080000	12090000
	chr5	123020000	123030000	chr5	123260000	123270000		chr12	77790000	77800000	chr12	77950000	77960000
	chr5	66660000	66670000	chr5	67540000	67550000		chr12	122610000	122620000	chr12	122760000	122770000
	chr5	135840000	135850000	chr5	136090000	136100000		chr12	127360000	127370000	chr12	127760000	127770000
	chr5	131600000	131610000	chr5	131840000	131850000		chr12	77970000	77980000	chr12	78090000	78100000
	chr5	60690000	60700000	chr5	60950000	60960000		chr12	1340000	1350000	chr12	1690000	1700000
	chr5	122370000	122380000	chr5	122670000	122680000		chr12	79550000	79560000	chr12	79750000	79760000
	chr5	77780000	77790000	chr5	78260000	78270000		chr12	117320000	117330000	chr12	117450000	117460000
	chr5	67080000	67090000	chr5	67530000	67540000		chr12	64320000	64330000	chr12	64610000	64620000
	chr5	101900000	101910000	chr5	102480000	102490000		chr12	49250000	49260000	chr12	49440000	49450000
	chr5	84540000	84550000	chr5	84630000	84640000		chr12	25580000	25590000	chr12	26100000	26110000
	chr5	58210000	58220000	chr5	58330000	58340000		chr12	13070000	13080000	chr12	13280000	13290000
	chr5	67380000	67390000	chr5	67510000	67520000		chr12	14370000	14380000	chr12	14860000	14870000
	chr5	41850000	41860000	chr5	41940000	41950000		chr12	79440000	79450000	chr12	79740000	79750000
	chr5	127150000	127160000	chr5	127410000	127420000		chr12	108170000	108180000	chr12	108300000	108310000
	chr5	100040000	100050000	chr5	100340000	100350000		chr12	107140000	107150000	chr12	107310000	107320000
	chr5	57070000	57080000	chr5	57320000	57330000		chr12	90210000	90220000	chr12	90480000	90490000
	chr5	50410000	50420000	chr5	50620000	50630000		chr12	46890000	46900000	chr12	47320000	47330000
	chr5	89370000	89380000	chr5	89550000	89560000		chr12	26270000	26280000	chr12	26760000	26770000
	chr5	174370000	174380000	chr5	174670000	174680000		chr12	86660000	86670000	chr12	87310000	87320000
	chr5	159930000	159940000	chr5	160140000	160150000		chr13	22200000	22210000	chr13	23340000	23350000
	chr5	33120000	33130000	chr5	33210000	33220000		chr13	38220000	38230000	chr13	39150000	39160000
	chr5	160240000	160250000	chr5	160400000	160410000		chr13	34110000	34120000	chr13	34390000	34400000
	chr5	92240000	92250000	chr5	92580000	92590000		chr13	43920000	43930000	chr13	44350000	44360000
	chr5	16370000	16380000	chr5	16450000	16460000		chr13	48910000	48920000	chr13	49350000	49360000
	chr5	164320000	164330000	chr5	164550000	164560000		chr13	76450000	76460000	chr13	76750000	76760000
	chr5	41860000	41870000	chr5	41990000	42000000		chr13	50690000	50700000	chr13	51370000	51380000
	chr5	143850000	143860000	chr5	144120000	144130000		chr13	50660000	50670000	chr13	51110000	51120000
	chr5	174370000	174380000	chr5	174590000	174600000		chr13	49540000	49550000	chr13	49810000	49820000
	chr5	111240000	111250000	chr5	111480000	111490000		chr13	49550000	49560000	chr13	49850000	49860000
	chr5	109560000	109570000	chr5	109750000	109760000		chr13	74410000	74420000	chr13	75800000	75810000
	chr5	61350000	61360000	chr5	61510000	61520000		chr13	111570000	111580000	chr13	111870000	111880000
	chr5	107730000	107740000	chr5	107810000	107820000		chr13	39840000	39850000	chr13	40230000	40240000
	chr5	109400000	109410000	chr5	109640000	109650000		chr13	20340000	20350000	chr13	20530000	20540000
	chr5	93130000	93140000	chr5	93230000	93240000		chr13	20250000	20260000	chr13	20530000	20540000
	chr5	123000000	123010000	chr5	123210000	123220000		chr13	49410000	49420000	chr13	49700000	49710000
	chr5	108630000	108640000	chr5	108810000	108820000		chr13	37880000	37890000	chr13	38170000	38180000
	chr5	75910000	75920000	chr5	76140000	76150000		chr13	78510000	78520000	chr13	78680000	78690000
	chr5	29000000	29010000	chr5	29250000	29260000		chr13	34320000	34330000	chr13	34650000	34660000
	chr5	158120000	158130000	chr5	158300000	158310000		chr13	42240000	42250000	chr13	42520000	42530000
	chr5	167690000	167700000	chr5	167940000	167950000		chr13	38440000	38450000	chr13	38930000	38940000
	chr5	111340000	111350000	chr5	111470000	111480000		chr13	113290000	113300000	chr13	113530000	113540000
	chr5	40980000	40990000	chr5	41130000	41140000		chr13	108880000	108890000	chr13	108970000	108980000
	chr5	105750000	105760000	chr5	105900000	105910000		chr13	85600000	85610000	chr13	85680000	85690000
	chr5	180030000	180040000	chr5	180180000	180190000		chr14	104040000	104050000	chr14	104380000	104390000
	chr5	13480000	13490000	chr5	13670000	13680000		chr14	104040000	104050000	chr14	104450000	104460000
	chr5	60760000	60770000	chr5	60950000	60960000		chr14	73510000	73520000	chr14	73940000	73950000
	chr5	71610000	71620000	chr5	71810000	71820000		chr14	68320000	68330000	chr14	69300000	69310000
	chr5	94370000	94380000	chr5	94570000	94580000		chr14	24720000	24730000	chr14	24900000	24910000
	chr5	151200000	151210000	chr5	151400000	151410000		chr14	23020000	23030000	chr14	23430000	23440000
	chr5	127080000	127090000	chr5	127370000	127380000		chr14	64290000	64300000	chr14	64610000	64620000
	chr5	40380000	40390000	chr5	40720000	40730000		chr14	77800000	77810000	chr14	78000000	78010000
	chr5	67580000	67590000	chr5	68090000	68100000		chr14	75940000	75950000	chr14	76110000	76120000
	chr6	50420000	50430000	chr6	50560000	50570000		chr14	68720000	68730000	chr14	69140000	69150000
	chr6	154730000	154740000	chr6	154950000	154960000		chr14	53010000	53020000	chr14	53140000	53150000
	chr6	148490000	148500000	chr6	148680000	148690000		chr14	66820000	66830000	chr14	67590000	67600000
	chr6	40020000	40030000	chr6	40270000	40280000		chr14	63860000	63870000	chr14	64210000	64220000
	chr6	800000	810000	chr6	1100000	1110000		chr14	61170000	61180000	chr14	61720000	61730000
	chr6	121930000	121940000	chr6	122350000	122360000		chr14	71770000	71780000	chr14	72180000	72190000
	chr6	131200000	131210000	chr6	131570000	131580000		chr14	35120000	35130000	chr14	35460000	35470000
	chr6	106890000	106900000	chr6	107130000	107140000		chr14	65890000	65900000	chr14	66420000	66430000
	chr6	100770000	100780000	chr6	101100000	101110000		chr14	31970000	31980000	chr14	32540000	32550000
	chr6	125990000	126000000	chr6	126070000	126080000		chr14	89630000	89640000	chr14	90370000	90380000
	chr6	74680000	74690000	chr6	75100000	75110000		chr14	102170000	102180000	chr14	102560000	102570000
	chr6	123050000	123060000	chr6	123260000	123270000		chr14	103430000	103440000	chr14	103770000	103780000
	chr6	113100000	113110000	chr6	113410000	113420000		chr14	50610000	50620000	chr14	50990000	51000000
	chr6	83300000	83310000	chr6	83530000	83540000		chr14	24440000	24450000	chr14	24630000	24640000
	chr6	8120000	8130000	chr6	8420000	8430000		chr14	35130000	35140000	chr14	35350000	35360000
	chr6	94430000	94440000	chr6	94760000	94770000		chr14	88400000	88410000	chr14	88590000	88600000
	chr6	25230000	25240000	chr6	25650000	25660000		chr14	68390000	68400000	chr14	68760000	68770000
	chr6	138030000	138040000	chr6	138420000	138430000		chr14	29280000	29290000	chr14	29680000	29690000
	chr6	82270000	82280000	chr6	82440000	82450000		chr14	45540000	45550000	chr14	45720000	45730000
	chr6	147830000	147840000	chr6	148290000	148300000		chr14	29510000	29520000	chr14	29840000	29850000
	chr6	19870000	19880000	chr6	20060000	20070000		chr14	78480000	78490000	chr14	79020000	79030000
	chr6	156500000	156510000	chr6	156710000	156720000		chr14	48560000	48570000	chr14	48860000	48870000
	chr6	48430000	48440000	chr6	48720000	48730000		chr14	92830000	92840000	chr14	93040000	93050000
	chr6	88630000	88640000	chr6	88950000	88960000		chr14	101440000	101450000	chr14	101610000	101620000
	chr6	75520000	75530000	chr6	75900000	75910000		chr14	80700000	80710000	chr14	80910000	80920000
	chr6	108420000	108430000	chr6	108740000	108750000		chr14	33850000	33860000	chr14	34250000	34260000
	chr6	154300000	154310000	chr6	154450000	154460000		chr14	61100000	61110000	chr14	61580000	61590000
	chr6	85770000	85780000	chr6	86020000	86030000		chr14	89890000	89900000	chr14	90160000	90170000
	chr6	161830000	161840000	chr6	162040000	162050000		chr14	63380000	63390000	chr14	63490000	63500000
	chr6	113200000	113210000	chr6	113440000	113450000		chr14	22670000	22680000	chr14	22910000	22920000
	chr6	27880000	27890000	chr6	28150000	28160000		chr14	32290000	32300000	chr14	32540000	32550000
	chr6	130590000	130600000	chr6	131150000	131160000		chr14	71660000	71670000	chr14	72210000	72220000
	chr6	39830000	39840000	chr6	40270000	40280000		chr15	95820000	95830000	chr15	96380000	96390000
	chr6	118290000	118300000	chr6	118540000	118550000		chr15	56770000	56780000	chr15	57490000	57500000
	chr6	75460000	75470000	chr6	75900000	75910000		chr15	47750000	47760000	chr15	48270000	48280000
	chr6	105900000	105910000	chr6	106550000	106560000		chr15	41730000	41740000	chr15	41940000	41950000
	chr6	114660000	114670000	chr6	115060000	115070000		chr15	88780000	88790000	chr15	88940000	88950000
	chr6	153360000	153370000	chr6	153560000	153570000		chr15	73600000	73610000	chr15	74200000	74210000
	chr6	155880000	155890000	chr6	156080000	156090000		chr15	39100000	39110000	chr15	39880000	39890000
	chr6	164050000	164060000	chr6	164370000	164380000		chr15	72500000	72510000	chr15	72850000	72860000
	chr6	21020000	21030000	chr6	21210000	21220000		chr15	65350000	65360000	chr15	65570000	65580000
	chr6	85880000	85890000	chr6	86030000	86040000		chr15	81290000	81300000	chr15	81540000	81550000
	chr6	125640000	125650000	chr6	125790000	125800000		chr15	48800000	48810000	chr15	49080000	49090000
	chr6	15890000	15900000	chr6	16130000	16140000		chr15	50800000	50810000	chr15	51180000	51190000
	chr6	118610000	118620000	chr6	119110000	119120000		chr15	49760000	49770000	chr15	50200000	50210000
	chr6	119670000	119680000	chr6	119890000	119900000		chr15	49760000	49770000	chr15	50340000	50350000
	chr6	149300000	149310000	chr6	149840000	149850000		chr15	99060000	99070000	chr15	99340000	99350000
	chr6	21160000	21170000	chr6	21580000	21590000		chr15	74270000	74280000	chr15	74630000	74640000
	chr6	144910000	144920000	chr6	145520000	145530000		chr15	39980000	39990000	chr15	40220000	40230000
	chr6	41570000	41580000	chr6	41700000	41710000		chr15	57210000	57220000	chr15	57490000	57500000
	chr6	11170000	11180000	chr6	11560000	11570000		chr15	57090000	57100000	chr15	57420000	57430000
	chr6	113440000	113450000	chr6	114210000	114220000		chr15	57170000	57180000	chr15	57590000	57600000
	chr6	122110000	122120000	chr6	122350000	122360000		chr15	63750000	63760000	chr15	64350000	64360000
	chr6	47280000	47290000	chr6	47450000	47460000		chr15	85130000	85140000	chr15	85460000	85470000
	chr6	161430000	161440000	chr6	161790000	161800000		chr15	85140000	85150000	chr15	85280000	85290000
	chr6	148220000	148230000	chr6	148450000	148460000		chr15	51450000	51460000	chr15	51790000	51800000
	chr6	27100000	27110000	chr6	27840000	27850000		chr15	99820000	99830000	chr15	99980000	99990000
	chr6	134970000	134980000	chr6	135240000	135250000		chr15	91060000	91070000	chr15	91420000	91430000
	chr6	15690000	15700000	chr6	15970000	15980000		chr15	80750000	80760000	chr15	80990000	81000000
	chr6	34140000	34150000	chr6	34580000	34590000		chr15	70010000	70020000	chr15	70780000	70790000
	chr6	170110000	170120000	chr6	170850000	170860000		chr15	36800000	36810000	chr15	37160000	37170000
	chr6	20630000	20640000	chr6	20860000	20870000		chr15	69800000	69810000	chr15	69990000	70000000
	chr6	8230000	8240000	chr6	8450000	8460000		chr15	69770000	69780000	chr15	70770000	70780000
	chr6	48500000	48510000	chr6	48710000	48720000		chr15	30940000	30950000	chr15	31440000	31450000
	chr6	133590000	133600000	chr6	133830000	133840000		chr15	40870000	40880000	chr15	41070000	41080000
	chr6	14210000	14220000	chr6	14490000	14500000		chr15	62150000	62160000	chr15	62600000	62610000
	chr6	123320000	123330000	chr6	123510000	123520000		chr15	63190000	63200000	chr15	63390000	63400000
	chr6	114670000	114680000	chr6	114750000	114760000		chr15	39450000	39460000	chr15	39820000	39830000
	chr6	159930000	159940000	chr6	160070000	160080000		chr15	76650000	76660000	chr15	76840000	76850000
	chr6	118350000	118360000	chr6	118560000	118570000		chr15	80740000	80750000	chr15	81200000	81210000
	chr6	131670000	131680000	chr6	131850000	131860000		chr15	81770000	81780000	chr15	82340000	82350000
	chr6	135570000	135580000	chr6	135740000	135750000		chr15	92830000	92840000	chr15	93020000	93030000
	chr6	15980000	15990000	chr6	16110000	16120000		chr15	83460000	83470000	chr15	83670000	83680000
	chr6	103580000	103590000	chr6	103710000	103720000		chr15	95800000	95810000	chr15	96170000	96180000
	chr6	1240000	1250000	chr6	1320000	1330000		chr15	98630000	98640000	chr15	98830000	98840000
	chr6	96600000	96610000	chr6	96960000	96970000		chr15	43280000	43290000	chr15	43580000	43590000
	chr6	139830000	139840000	chr6	140080000	140090000		chr15	53300000	53310000	chr15	53480000	53490000
	chr6	111060000	111070000	chr6	111270000	111280000		chr15	99800000	99810000	chr15	100070000	100080000
	chr6	125180000	125190000	chr6	125390000	125400000		chr15	66800000	66810000	chr15	66890000	66900000
	chr6	66980000	66990000	chr6	67120000	67130000		chr15	36460000	36470000	chr15	36590000	36600000
	chr6	69690000	69700000	chr6	69860000	69870000		chr15	95210000	95220000	chr15	95380000	95390000
	chr6	153660000	153670000	chr6	153850000	153860000		chr15	60380000	60390000	chr15	60610000	60620000
	chr6	91560000	91570000	chr6	91640000	91650000		chr16	69370000	69380000	chr16	69610000	69620000
	chr6	19540000	19550000	chr6	19850000	19860000		chr16	52220000	52230000	chr16	52910000	52920000
	chr6	129290000	129300000	chr6	129540000	129550000		chr16	85300000	85310000	chr16	85740000	85750000
	chr6	49100000	49110000	chr6	49370000	49380000		chr16	83860000	83870000	chr16	83980000	83990000
	chr6	161160000	161170000	chr6	161450000	161460000		chr16	78530000	78540000	chr16	78790000	78800000
	chr6	153170000	153180000	chr6	153330000	153340000		chr16	17380000	17390000	chr16	17540000	17550000
	chr6	137280000	137290000	chr6	137470000	137480000		chr16	14360000	14370000	chr16	14770000	14780000
	chr6	113440000	113450000	chr6	113650000	113660000		chr16	48280000	48290000	chr16	48650000	48660000
	chr6	96450000	96460000	chr6	96680000	96690000		chr16	3200000	3210000	chr16	3550000	3560000
	chr6	37680000	37690000	chr6	37900000	37910000		chr16	89330000	89340000	chr16	89560000	89570000
	chr6	169300000	169310000	chr6	169920000	169930000		chr16	70320000	70330000	chr16	70490000	70500000
	chr6	140870000	140880000	chr6	141240000	141250000		chr16	85420000	85430000	chr16	85750000	85760000
	chr6	19030000	19040000	chr6	19250000	19260000		chr16	53810000	53820000	chr16	54000000	54010000
	chr6	15780000	15790000	chr6	16190000	16200000		chr16	5290000	5300000	chr16	5680000	5690000
	chr6	135380000	135390000	chr6	135560000	135570000		chr16	5270000	5280000	chr16	5550000	5560000
	chr6	97520000	97530000	chr6	97900000	97910000		chr16	67210000	67220000	chr16	67460000	67470000
	chr6	10890000	10900000	chr6	11070000	11080000		chr16	87620000	87630000	chr16	87950000	87960000
	chr6	98020000	98030000	chr6	98220000	98230000		chr16	66440000	66450000	chr16	66780000	66790000
	chr6	80930000	80940000	chr6	81300000	81310000		chr16	58070000	58080000	chr16	58220000	58230000
	chr6	45010000	45020000	chr6	45370000	45380000		chr16	88340000	88350000	chr16	88620000	88630000
	chr6	55650000	55660000	chr6	55750000	55760000		chr16	20000000	20010000	chr16	20260000	20270000
	chr6	19200000	19210000	chr6	19330000	19340000		chr16	53380000	53390000	chr16	53540000	53550000
	chr6	77080000	77090000	chr6	77210000	77220000		chr16	55070000	55080000	chr16	55190000	55200000
	chr6	96320000	96330000	chr6	96450000	96460000		chr16	74740000	74750000	chr16	75020000	75030000
	chr6	31420000	31430000	chr6	31560000	31570000		chr16	48260000	48270000	chr16	48590000	48600000
	chr6	65290000	65300000	chr6	65430000	65440000		chr17	73890000	73900000	chr17	74260000	74270000
	chr6	300000	310000	chr6	460000	470000		chr17	80190000	80200000	chr17	80490000	80500000
	chr6	48550000	48560000	chr6	48720000	48730000		chr17	43300000	43310000	chr17	43690000	43700000
	chr6	169910000	169920000	chr6	170080000	170090000		chr17	78160000	78170000	chr17	78330000	78340000
	chr6	166070000	166080000	chr6	166250000	166260000		chr17	58300000	58310000	chr17	58700000	58710000
	chr6	156640000	156650000	chr6	156840000	156850000		chr17	70110000	70120000	chr17	70430000	70440000
	chr6	37670000	37680000	chr6	37880000	37890000		chr17	71420000	71430000	chr17	72170000	72180000
	chr6	44620000	44630000	chr6	44910000	44920000		chr17	43210000	43220000	chr17	43450000	43460000
	chr6	107500000	107510000	chr6	107910000	107920000		chr17	55230000	55240000	chr17	55740000	55750000
	chr7	81910000	81920000	chr7	82200000	82210000		chr17	15560000	15570000	chr17	15900000	15910000
	chr7	88180000	88190000	chr7	88440000	88450000		chr17	47790000	47800000	chr17	48080000	48090000
	chr7	80690000	80700000	chr7	80900000	80910000		chr17	8210000	8220000	chr17	8670000	8680000
	chr7	126500000	126510000	chr7	126690000	126700000		chr17	77980000	77990000	chr17	78320000	78330000
	chr7	87560000	87570000	chr7	87800000	87810000		chr17	35010000	35020000	chr17	35230000	35240000
	chr7	42070000	42080000	chr7	42260000	42270000		chr17	79500000	79510000	chr17	79670000	79680000
	chr7	149600000	149610000	chr7	149740000	149750000		chr17	19900000	19910000	chr17	20110000	20120000
	chr7	70180000	70190000	chr7	70260000	70270000		chr17	36750000	36760000	chr17	36900000	36910000
	chr7	11620000	11630000	chr7	11860000	11870000		chr17	36630000	36640000	chr17	36900000	36910000
	chr7	124950000	124960000	chr7	125280000	125290000		chr17	16460000	16470000	chr17	16890000	16900000
	chr7	96050000	96060000	chr7	96320000	96330000		chr17	46310000	46320000	chr17	46640000	46650000
	chr7	96050000	96060000	chr7	96490000	96500000		chr17	61700000	61710000	chr17	61880000	61890000
	chr7	96070000	96080000	chr7	96170000	96180000		chr17	67570000	67580000	chr17	67840000	67850000
	chr7	96040000	96050000	chr7	96230000	96240000		chr17	75570000	75580000	chr17	75880000	75890000
	chr7	41330000	41340000	chr7	41740000	41750000		chr17	80620000	80630000	chr17	80900000	80910000
	chr7	79690000	79700000	chr7	79880000	79890000		chr17	45280000	45290000	chr17	45470000	45480000
	chr7	114040000	114050000	chr7	114290000	114300000		chr17	8310000	8320000	chr17	8540000	8550000
	chr7	19170000	19180000	chr7	19370000	19380000		chr17	41010000	41020000	chr17	41250000	41260000
	chr7	107090000	107100000	chr7	107490000	107500000		chr17	8370000	8380000	chr17	8630000	8640000
	chr7	113770000	113780000	chr7	114020000	114030000		chr17	42850000	42860000	chr17	43090000	43100000
	chr7	20890000	20900000	chr7	21280000	21290000		chr17	25380000	25390000	chr17	25530000	25540000
	chr7	28500000	28510000	chr7	28870000	28880000		chr17	73330000	73340000	chr17	73510000	73520000
	chr7	121700000	121710000	chr7	122040000	122050000		chr17	17660000	17670000	chr17	17940000	17950000
	chr7	94070000	94080000	chr7	94220000	94230000		chr17	79600000	79610000	chr17	79800000	79810000
	chr7	94080000	94090000	chr7	94530000	94540000		chr17	66240000	66250000	chr17	66500000	66510000
	chr7	23990000	24000000	chr7	24270000	24280000		chr17	61500000	61510000	chr17	61850000	61860000
	chr7	80920000	80930000	chr7	81080000	81090000		chr17	41000000	41010000	chr17	41170000	41180000
	chr7	48470000	48480000	chr7	48760000	48770000		chr17	61690000	61700000	chr17	61920000	61930000
	chr7	88600000	88610000	chr7	88810000	88820000		chr17	68160000	68170000	chr17	68400000	68410000
	chr7	24330000	24340000	chr7	24730000	24740000		chr17	9950000	9960000	chr17	10200000	10210000
	chr7	117980000	117990000	chr7	118820000	118830000		chr17	80300000	80310000	chr17	80600000	80610000
	chr7	112580000	112590000	chr7	112740000	112750000		chr17	16490000	16500000	chr17	16820000	16830000
	chr7	94930000	94940000	chr7	95090000	95100000		chr17	58790000	58800000	chr17	59170000	59180000
	chr7	124210000	124220000	chr7	124410000	124420000		chr18	43750000	43760000	chr18	44060000	44070000
	chr7	39330000	39340000	chr7	39480000	39490000		chr18	33670000	33680000	chr18	34320000	34330000
	chr7	142120000	142130000	chr7	142540000	142550000		chr18	46570000	46580000	chr18	46970000	46980000
	chr7	142140000	142150000	chr7	142360000	142370000		chr18	9960000	9970000	chr18	10440000	10450000
	chr7	95550000	95560000	chr7	95850000	95860000		chr18	59410000	59420000	chr18	59790000	59800000
	chr7	46410000	46420000	chr7	46730000	46740000		chr18	9570000	9580000	chr18	9910000	9920000
	chr7	46470000	46480000	chr7	46690000	46700000		chr18	9580000	9590000	chr18	9840000	9850000
	chr7	34800000	34810000	chr7	35080000	35090000		chr18	59230000	59240000	chr18	59700000	59710000
	chr7	66860000	66870000	chr7	66940000	66950000		chr18	64210000	64220000	chr18	64540000	64550000
	chr7	7780000	7790000	chr7	8250000	8260000		chr18	51080000	51090000	chr18	51640000	51650000
	chr7	106130000	106140000	chr7	106390000	106400000		chr18	46470000	46480000	chr18	46770000	46780000
	chr7	124700000	124710000	chr7	124880000	124890000		chr18	44590000	44600000	chr18	45260000	45270000
	chr7	83040000	83050000	chr7	83410000	83420000		chr18	56540000	56550000	chr18	56700000	56710000
	chr7	85200000	85210000	chr7	85450000	85460000		chr18	74700000	74710000	chr18	75030000	75040000
	chr7	18120000	18130000	chr7	18260000	18270000		chr18	45570000	45580000	chr18	45950000	45960000
	chr7	12720000	12730000	chr7	12880000	12890000		chr18	860000	870000	chr18	2550000	2560000
	chr7	92260000	92270000	chr7	92610000	92620000		chr18	3710000	3720000	chr18	3970000	3980000
	chr7	96220000	96230000	chr7	96630000	96640000		chr18	23660000	23670000	chr18	23810000	23820000
	chr7	105900000	105910000	chr7	106160000	106170000		chr18	21200000	21210000	chr18	21480000	21490000
	chr7	42290000	42300000	chr7	42500000	42510000		chr18	42060000	42070000	chr18	42230000	42240000
	chr7	42270000	42280000	chr7	42730000	42740000		chr18	33340000	33350000	chr18	33620000	33630000
	chr7	142330000	142340000	chr7	142690000	142700000		chr18	28670000	28680000	chr18	28930000	28940000
	chr7	142340000	142350000	chr7	142570000	142580000		chr18	38360000	38370000	chr18	38560000	38570000
	chr7	7210000	7220000	chr7	7440000	7450000		chr18	67780000	67790000	chr18	68110000	68120000
	chr7	46580000	46590000	chr7	47120000	47130000		chr18	61760000	61770000	chr18	61840000	61850000
	chr7	84690000	84700000	chr7	85010000	85020000		chr18	34410000	34420000	chr18	34600000	34610000
	chr7	820000	830000	chr7	1000000	1010000		chr18	11250000	11260000	chr18	11550000	11560000
	chr7	124510000	124520000	chr7	124670000	124680000		chr18	59340000	59350000	chr18	59790000	59800000
	chr7	41540000	41550000	chr7	41730000	41740000		chr18	49480000	49490000	chr18	49810000	49820000
	chr7	83570000	83580000	chr7	84050000	84060000		chr18	39020000	39030000	chr18	39290000	39300000
	chr7	54940000	54950000	chr7	55200000	55210000		chr18	33930000	33940000	chr18	34330000	34340000
	chr7	119940000	119950000	chr7	120190000	120200000		chr18	47210000	47220000	chr18	47380000	47390000
	chr7	119710000	119720000	chr7	119910000	119920000		chr18	29740000	29750000	chr18	30230000	30240000
	chr7	16370000	16380000	chr7	16590000	16600000		chr19	2110000	2120000	chr19	2210000	2220000
	chr7	39610000	39620000	chr7	40080000	40090000		chr19	2340000	2350000	chr19	2760000	2770000
	chr7	83310000	83320000	chr7	83530000	83540000		chr19	1920000	1930000	chr19	2210000	2220000
	chr7	27460000	27470000	chr7	27590000	27600000		chr19	57980000	57990000	chr19	58320000	58330000
	chr7	93420000	93430000	chr7	93700000	93710000		chr19	15730000	15740000	chr19	16290000	16300000
	chr7	41410000	41420000	chr7	41720000	41730000		chr19	51650000	51660000	chr19	51940000	51950000
	chr7	12800000	12810000	chr7	12980000	12990000		chr19	11250000	11260000	chr19	11480000	11490000
	chr7	149720000	149730000	chr7	149960000	149970000		chr19	44620000	44630000	chr19	44990000	45000000
	chr7	88180000	88190000	chr7	88270000	88280000		chr19	55800000	55810000	chr19	56010000	56020000
	chr7	149650000	149660000	chr7	149740000	149750000		chr19	33720000	33730000	chr19	34230000	34240000
	chr7	122440000	122450000	chr7	122700000	122710000		chr19	39630000	39640000	chr19	39900000	39910000
	chr7	83450000	83460000	chr7	83530000	83540000		chr19	52870000	52880000	chr19	53120000	53130000
	chr7	62480000	62490000	chr7	62660000	62670000		chr19	40270000	40280000	chr19	40600000	40610000
	chr7	137870000	137880000	chr7	138170000	138180000		chr19	44330000	44340000	chr19	44620000	44630000
	chr7	41640000	41650000	chr7	41730000	41740000		chr19	45590000	45600000	chr19	45740000	45750000
	chr7	119580000	119590000	chr7	119820000	119830000		chr19	15200000	15210000	chr19	15540000	15550000
	chr7	157520000	157530000	chr7	157650000	157660000		chr19	45070000	45080000	chr19	45350000	45360000
	chr7	33500000	33510000	chr7	33700000	33710000		chr19	290000	300000	chr19	480000	490000
	chr7	33530000	33540000	chr7	33740000	33750000		chr19	9310000	9320000	chr19	9710000	9720000
	chr7	82070000	82080000	chr7	82210000	82220000		chr19	9300000	9310000	chr19	9580000	9590000
	chr7	54180000	54190000	chr7	54350000	54360000		chr19	11800000	11810000	chr19	12100000	12110000
	chr7	91190000	91200000	chr7	91410000	91420000		chr19	3820000	3830000	chr19	4200000	4210000
	chr7	84660000	84670000	chr7	84920000	84930000		chr19	47350000	47360000	chr19	47610000	47620000
	chr7	96040000	96050000	chr7	96290000	96300000		chr19	3760000	3770000	chr19	4200000	4210000
	chr7	15360000	15370000	chr7	15670000	15680000		chr19	57260000	57270000	chr19	57450000	57460000
	chr7	20860000	20870000	chr7	21010000	21020000		chr19	24080000	24090000	chr19	24350000	24360000
	chr7	112040000	112050000	chr7	112120000	112130000		chr19	37200000	37210000	chr19	37610000	37620000
	chr7	120920000	120930000	chr7	121210000	121220000		chr19	38470000	38480000	chr19	38700000	38710000
	chr7	145740000	145750000	chr7	145830000	145840000		chr19	12280000	12290000	chr19	12570000	12580000
	chr7	133920000	133930000	chr7	134090000	134100000		chr19	37240000	37250000	chr19	37390000	37400000
	chr7	112860000	112870000	chr7	113040000	113050000		chr19	40400000	40410000	chr19	40730000	40740000
	chr7	135090000	135100000	chr7	135310000	135320000		chr19	57700000	57710000	chr19	57880000	57890000
	chr7	16150000	16160000	chr7	16280000	16290000		chr19	1920000	1930000	chr19	2190000	2200000
	chr7	57480000	57490000	chr7	57830000	57840000		chr19	52770000	52780000	chr19	53160000	53170000
	chr7	96040000	96050000	chr7	96360000	96370000		chr19	1530000	1540000	chr19	1720000	1730000
	chr7	83370000	83380000	chr7	83460000	83470000		chr19	12490000	12500000	chr19	12750000	12760000
	chr7	116070000	116080000	chr7	116220000	116230000		chr19	9610000	9620000	chr19	9800000	9810000
	chr7	156030000	156040000	chr7	156180000	156190000		chr19	44630000	44640000	chr19	45050000	45060000
	chr7	93510000	93520000	chr7	93670000	93680000		chr19	13390000	13400000	chr19	13770000	13780000
	chr7	88180000	88190000	chr7	88360000	88370000		chr19	3210000	3220000	chr19	3470000	3480000
	chr7	12160000	12170000	chr7	12360000	12370000		chr19	21670000	21680000	chr19	21750000	21760000
	chr7	33260000	33270000	chr7	33470000	33480000		chr19	57250000	57260000	chr19	57420000	57430000
	chr7	114650000	114660000	chr7	114860000	114870000		chr19	58730000	58740000	chr19	58900000	58910000
	chr7	111680000	111690000	chr7	111930000	111940000		chr19	46890000	46900000	chr19	47080000	47090000
	chr7	11460000	11470000	chr7	11790000	11800000		chr19	6510000	6520000	chr19	6770000	6780000
	chr7	48410000	48420000	chr7	48910000	48920000		chr1	16840000	16850000	chr1	17210000	17220000
	chr8	6110000	6120000	chr8	6220000	6230000		chr1	175860000	175870000	chr1	176040000	176050000
	chr8	42560000	42570000	chr8	42790000	42800000		chr1	65690000	65700000	chr1	66000000	66010000
	chr8	29390000	29400000	chr8	29870000	29880000		chr1	210180000	210190000	chr1	210480000	210490000
	chr8	54420000	54430000	chr8	54720000	54730000		chr1	150430000	150440000	chr1	150790000	150800000
	chr8	4160000	4170000	chr8	4250000	4260000		chr1	28180000	28190000	chr1	28540000	28550000
	chr8	128210000	128220000	chr8	128620000	128630000		chr1	2920000	2930000	chr1	3230000	3240000
	chr8	10850000	10860000	chr8	11110000	11120000		chr1	9780000	9790000	chr1	9970000	9980000
	chr8	9230000	9240000	chr8	9410000	9420000		chr1	51910000	51920000	chr1	52220000	52230000
	chr8	2030000	2040000	chr8	2170000	2180000		chr1	51820000	51830000	chr1	52230000	52240000
	chr8	102830000	102840000	chr8	103200000	103210000		chr1	186380000	186390000	chr1	186770000	186780000
	chr8	64300000	64310000	chr8	64500000	64510000		chr1	8990000	9000000	chr1	9260000	9270000
	chr8	39880000	39890000	chr8	40840000	40850000		chr1	15390000	15400000	chr1	15590000	15600000
	chr8	82390000	82400000	chr8	82500000	82510000		chr1	200090000	200100000	chr1	200460000	200470000
	chr8	8750000	8760000	chr8	8840000	8850000		chr1	228320000	228330000	chr1	228540000	228550000
	chr8	107300000	107310000	chr8	107510000	107520000		chr1	25610000	25620000	chr1	25830000	25840000
	chr8	13240000	13250000	chr8	13410000	13420000		chr1	229120000	229130000	chr1	229350000	229360000
	chr8	18060000	18070000	chr8	18330000	18340000		chr1	168320000	168330000	chr1	168460000	168470000
	chr8	95810000	95820000	chr8	96270000	96280000		chr1	3070000	3080000	chr1	3320000	3330000
	chr8	8610000	8620000	chr8	9000000	9010000		chr1	234260000	234270000	chr1	234570000	234580000
	chr8	124350000	124360000	chr8	124780000	124790000		chr1	167230000	167240000	chr1	167520000	167530000
	chr8	100390000	100400000	chr8	100650000	100660000		chr1	165590000	165600000	chr1	165790000	165800000
	chr8	12980000	12990000	chr8	13120000	13130000		chr1	6550000	6560000	chr1	6690000	6700000
	chr8	12980000	12990000	chr8	13510000	13520000		chr1	17990000	18000000	chr1	18150000	18160000
	chr8	11170000	11180000	chr8	11260000	11270000		chr1	17990000	18000000	chr1	18070000	18080000
	chr8	11150000	11160000	chr8	11400000	11410000		chr1	245760000	245770000	chr1	246140000	246150000
	chr8	61510000	61520000	chr8	62000000	62010000		chr1	228950000	228960000	chr1	229350000	229360000
	chr8	9810000	9820000	chr8	10180000	10190000		chr1	25180000	25190000	chr1	25420000	25430000
	chr8	107010000	107020000	chr8	107260000	107270000		chr1	118610000	118620000	chr1	119520000	119530000
	chr8	106950000	106960000	chr8	107610000	107620000		chr1	113700000	113710000	chr1	114080000	114090000
	chr8	127410000	127420000	chr8	127700000	127710000		chr1	26840000	26850000	chr1	27200000	27210000
	chr8	32410000	32420000	chr8	32770000	32780000		chr1	30780000	30790000	chr1	31170000	31180000
	chr8	720000	730000	chr8	880000	890000		chr1	234500000	234510000	chr1	234600000	234610000
	chr8	220000	230000	chr8	490000	500000		chr1	205230000	205240000	chr1	205450000	205460000
	chr8	122670000	122680000	chr8	123070000	123080000		chr1	172890000	172900000	chr1	173080000	173090000
	chr8	94480000	94490000	chr8	94620000	94630000		chr1	75700000	75710000	chr1	76030000	76040000
	chr8	53860000	53870000	chr8	54710000	54720000		chr1	19590000	19600000	chr1	19970000	19980000
	chr8	92110000	92120000	chr8	92240000	92250000		chr1	79310000	79320000	chr1	79810000	79820000
	chr8	86380000	86390000	chr8	86550000	86560000		chr1	7530000	7540000	chr1	7690000	7700000
	chr8	134580000	134590000	chr8	135040000	135050000		chr1	210030000	210040000	chr1	210480000	210490000
	chr8	134580000	134590000	chr8	134780000	134790000		chr1	210020000	210030000	chr1	210290000	210300000
	chr8	10930000	10940000	chr8	11110000	11120000		chr1	115520000	115530000	chr1	116140000	116150000
	chr8	18250000	18260000	chr8	18530000	18540000		chr1	227730000	227740000	chr1	228130000	228140000
	chr8	16280000	16290000	chr8	16610000	16620000		chr1	203240000	203250000	chr1	203660000	203670000
	chr8	37630000	37640000	chr8	38000000	38010000		chr1	169440000	169450000	chr1	169780000	169790000
	chr8	40100000	40110000	chr8	40830000	40840000		chr1	21140000	21150000	chr1	21250000	21260000
	chr8	124470000	124480000	chr8	124640000	124650000		chr1	154460000	154470000	chr1	154840000	154850000
	chr8	1490000	1500000	chr8	1630000	1640000		chr1	234760000	234770000	chr1	235050000	235060000
	chr8	50210000	50220000	chr8	50810000	50820000		chr1	179670000	179680000	chr1	180130000	180140000
	chr8	68760000	68770000	chr8	69170000	69180000		chr1	218500000	218510000	chr1	219590000	219600000
	chr8	78870000	78880000	chr8	79150000	79160000		chr1	218500000	218510000	chr1	219080000	219090000
	chr8	10040000	10050000	chr8	10120000	10130000		chr1	146740000	146750000	chr1	147380000	147390000
	chr8	2040000	2050000	chr8	2120000	2130000		chr1	216470000	216480000	chr1	216910000	216920000
	chr8	65200000	65210000	chr8	65280000	65290000		chr1	9260000	9270000	chr1	9630000	9640000
	chr8	5840000	5850000	chr8	5920000	5930000		chr1	166460000	166470000	chr1	166810000	166820000
	chr8	82190000	82200000	chr8	82340000	82350000		chr1	203010000	203020000	chr1	203300000	203310000
	chr8	9900000	9910000	chr8	10060000	10070000		chr1	175330000	175340000	chr1	176040000	176050000
	chr8	78980000	78990000	chr8	79130000	79140000		chr1	185430000	185440000	chr1	185650000	185660000
	chr8	78930000	78940000	chr8	79080000	79090000		chr1	1890000	1900000	chr1	2100000	2110000
	chr8	4770000	4780000	chr8	4850000	4860000		chr1	25730000	25740000	chr1	26110000	26120000
	chr8	109460000	109470000	chr8	109690000	109700000		chr1	25720000	25730000	chr1	25840000	25850000
	chr8	9400000	9410000	chr8	9510000	9520000		chr1	11370000	11380000	chr1	11580000	11590000
	chr8	100400000	100410000	chr8	100730000	100740000		chr1	8440000	8450000	chr1	8610000	8620000
	chr8	72730000	72740000	chr8	72980000	72990000		chr1	204120000	204130000	chr1	204470000	204480000
	chr8	14400000	14410000	chr8	14710000	14720000		chr1	15470000	15480000	chr1	15590000	15600000
	chr8	98330000	98340000	chr8	98560000	98570000		chr1	204950000	204960000	chr1	205130000	205140000
	chr8	49220000	49230000	chr8	49500000	49510000		chr1	32390000	32400000	chr1	32520000	32530000
	chr8	18380000	18390000	chr8	18530000	18540000		chr1	222000000	222010000	chr1	222170000	222180000
	chr8	122360000	122370000	chr8	122630000	122640000		chr1	246010000	246020000	chr1	246160000	246170000
	chr8	107180000	107190000	chr8	107540000	107550000		chr1	233410000	233420000	chr1	233490000	233500000
	chr8	91650000	91660000	chr8	91840000	91850000		chr1	65760000	65770000	chr1	66140000	66150000
	chr8	32750000	32760000	chr8	32950000	32960000		chr1	115780000	115790000	chr1	116120000	116130000
	chr8	6780000	6790000	chr8	6900000	6910000		chr1	8670000	8680000	chr1	8900000	8910000
	chr8	50610000	50620000	chr8	50810000	50820000		chr1	215400000	215410000	chr1	215690000	215700000
	chr8	9220000	9230000	chr8	9450000	9460000		chr1	38490000	38500000	chr1	38850000	38860000
	chr8	32420000	32430000	chr8	32840000	32850000		chr1	164420000	164430000	chr1	164740000	164750000
	chr8	10900000	10910000	chr8	11130000	11140000		chr1	11090000	11100000	chr1	11250000	11260000
	chr8	40110000	40120000	chr8	40320000	40330000		chr1	118950000	118960000	chr1	119270000	119280000
	chr8	11050000	11060000	chr8	11130000	11140000		chr1	59700000	59710000	chr1	60160000	60170000
	chr8	910000	920000	chr8	1000000	1010000		chr1	84960000	84970000	chr1	85140000	85150000
	chr8	75290000	75300000	chr8	75610000	75620000		chr1	227200000	227210000	chr1	227620000	227630000
	chr8	22360000	22370000	chr8	22440000	22450000		chr1	173840000	173850000	chr1	174050000	174060000
	chr8	13230000	13240000	chr8	13360000	13370000		chr1	22020000	22030000	chr1	22360000	22370000
	chr8	51170000	51180000	chr8	51300000	51310000		chr1	236670000	236680000	chr1	236750000	236760000
	chr8	112010000	112020000	chr8	112140000	112150000		chr1	21010000	21020000	chr1	21300000	21310000
	chr8	16380000	16390000	chr8	16520000	16530000		chr1	4720000	4730000	chr1	4840000	4850000
	chr8	93830000	93840000	chr8	93980000	93990000		chr1	179910000	179920000	chr1	180140000	180150000
	chr8	100980000	100990000	chr8	101130000	101140000		chr1	96220000	96230000	chr1	96310000	96320000
	chr8	24420000	24430000	chr8	24580000	24590000		chr1	166100000	166110000	chr1	166370000	166380000
	chr8	127230000	127240000	chr8	127390000	127400000		chr1	234980000	234990000	chr1	235180000	235190000
	chr8	25590000	25600000	chr8	25760000	25770000		chr1	155830000	155840000	chr1	156030000	156040000
	chr8	145580000	145590000	chr8	145750000	145760000		chr1	71150000	71160000	chr1	71370000	71380000
	chr8	136580000	136590000	chr8	136800000	136810000		chr1	158160000	158170000	chr1	158400000	158410000
	chr8	98260000	98270000	chr8	98490000	98500000		chr1	22550000	22560000	chr1	22960000	22970000
	chr8	9840000	9850000	chr8	10130000	10140000		chr1	2870000	2880000	chr1	3330000	3340000
	chr8	16250000	16260000	chr8	16610000	16620000		chr1	118690000	118700000	chr1	119220000	119230000
	chr9	21320000	21330000	chr9	24240000	24250000		chr20	56830000	56840000	chr20	57220000	57230000
	chr9	91710000	91720000	chr9	91890000	91900000		chr20	57810000	57820000	chr20	58060000	58070000
	chr9	118920000	118930000	chr9	119090000	119100000		chr20	34810000	34820000	chr20	35160000	35170000
	chr9	127200000	127210000	chr9	127370000	127380000		chr20	8280000	8290000	chr20	8700000	8710000
	chr9	127170000	127180000	chr9	127490000	127500000		chr20	52160000	52170000	chr20	52670000	52680000
	chr9	3530000	3540000	chr9	3700000	3710000		chr20	25680000	25690000	chr20	25950000	25960000
	chr9	124880000	124890000	chr9	125180000	125190000		chr20	32890000	32900000	chr20	33290000	33300000
	chr9	75260000	75270000	chr9	75430000	75440000		chr20	39620000	39630000	chr20	39950000	39960000
	chr9	17810000	17820000	chr9	17980000	17990000		chr20	18870000	18880000	chr20	19080000	19090000
	chr9	90130000	90140000	chr9	90260000	90270000		chr20	31100000	31110000	chr20	31350000	31360000
	chr9	93410000	93420000	chr9	93620000	93630000		chr20	8030000	8040000	chr20	8270000	8280000
	chr9	119670000	119680000	chr9	119840000	119850000		chr20	37080000	37090000	chr20	37360000	37370000
	chr9	36230000	36240000	chr9	36590000	36600000		chr20	62170000	62180000	chr20	62440000	62450000
	chr9	34310000	34320000	chr9	34600000	34610000		chr20	31490000	31500000	chr20	31870000	31880000
	chr9	81070000	81080000	chr9	81290000	81300000		chr20	13100000	13110000	chr20	13510000	13520000
	chr9	2340000	2350000	chr9	2620000	2630000		chr20	60590000	60600000	chr20	60810000	60820000
	chr9	71330000	71340000	chr9	71620000	71630000		chr20	17960000	17970000	chr20	18110000	18120000
	chr9	94180000	94190000	chr9	94470000	94480000		chr20	17670000	17680000	chr20	17840000	17850000
	chr9	20360000	20370000	chr9	20670000	20680000		chr20	62440000	62450000	chr20	62600000	62610000
	chr9	1020000	1030000	chr9	1530000	1540000		chr20	25470000	25480000	chr20	25720000	25730000
	chr9	128180000	128190000	chr9	128360000	128370000		chr20	13560000	13570000	chr20	13740000	13750000
	chr9	71860000	71870000	chr9	72160000	72170000		chr20	30210000	30220000	chr20	30390000	30400000
	chr9	73900000	73910000	chr9	74390000	74400000		chr20	8510000	8520000	chr20	8680000	8690000
	chr9	79430000	79440000	chr9	79740000	79750000		chr20	37170000	37180000	chr20	37360000	37370000
	chr9	89730000	89740000	chr9	89940000	89950000		chr20	8360000	8370000	chr20	8690000	8700000
	chr9	94000000	94010000	chr9	94180000	94190000		chr20	37070000	37080000	chr20	37260000	37270000
	chr9	72020000	72030000	chr9	72280000	72290000		chr20	34740000	34750000	chr20	34890000	34900000
	chr9	27330000	27340000	chr9	27710000	27720000		chr20	17590000	17600000	chr20	17870000	17880000
	chr9	127520000	127530000	chr9	127680000	127690000		chr21	28250000	28260000	chr21	28550000	28560000
	chr9	33290000	33300000	chr9	33710000	33720000		chr21	29100000	29110000	chr21	30110000	30120000
	chr9	3860000	3870000	chr9	4220000	4230000		chr21	43250000	43260000	chr21	43430000	43440000
	chr9	138880000	138890000	chr9	139160000	139170000		chr21	42080000	42090000	chr21	42430000	42440000
	chr9	84290000	84300000	chr9	84370000	84380000		chr21	27560000	27570000	chr21	28040000	28050000
	chr9	97400000	97410000	chr9	97490000	97500000		chr21	27550000	27560000	chr21	28090000	28100000
	chr9	109050000	109060000	chr9	109240000	109250000		chr21	39510000	39520000	chr21	39590000	39600000
	chr9	106600000	106610000	chr9	106760000	106770000		chr21	37800000	37810000	chr21	38300000	38310000
	chr9	73250000	73260000	chr9	73490000	73500000		chr21	36110000	36120000	chr21	36770000	36780000
	chr9	123390000	123400000	chr9	123570000	123580000		chr21	28780000	28790000	chr21	29050000	29060000
	chr9	20090000	20100000	chr9	20290000	20300000		chr21	16110000	16120000	chr21	16960000	16970000
	chr9	32010000	32020000	chr9	32210000	32220000		chr21	47800000	47810000	chr21	48060000	48070000
	chr9	92990000	93000000	chr9	93330000	93340000		chr21	41770000	41780000	chr21	42430000	42440000
	chr9	16190000	16200000	chr9	16420000	16430000		chr21	19460000	19470000	chr21	19600000	19610000
	chr9	139660000	139670000	chr9	139980000	139990000		chr21	27580000	27590000	chr21	27750000	27760000
	chr9	16290000	16300000	chr9	16630000	16640000		chr21	28250000	28260000	chr21	28460000	28470000
	chr9	25260000	25270000	chr9	25720000	25730000		chr21	36790000	36800000	chr21	36940000	36950000
	chr9	138480000	138490000	chr9	138660000	138670000		chr21	34520000	34530000	chr21	34810000	34820000
	chr9	33620000	33630000	chr9	33790000	33800000		chr22	36020000	36030000	chr22	36500000	36510000
	chr9	9610000	9620000	chr9	9920000	9930000		chr22	50150000	50160000	chr22	50570000	50580000
	chr9	16450000	16460000	chr9	16640000	16650000		chr22	45560000	45570000	chr22	45810000	45820000
	chr9	1640000	1650000	chr9	1880000	1890000		chr22	44480000	44490000	chr22	44950000	44960000
	chr9	86550000	86560000	chr9	86700000	86710000		chr22	36950000	36960000	chr22	37350000	37360000
	chr9	24520000	24530000	chr9	24790000	24800000		chr22	28440000	28450000	chr22	28910000	28920000
	chr9	130320000	130330000	chr9	130670000	130680000		chr22	43050000	43060000	chr22	43510000	43520000
	chr9	29800000	29810000	chr9	29970000	29980000		chr22	38910000	38920000	chr22	39090000	39100000
	chr9	110260000	110270000	chr9	110680000	110690000		chr22	49330000	49340000	chr22	49690000	49700000
	chr9	95600000	95610000	chr9	95820000	95830000		chr22	24990000	25000000	chr22	25140000	25150000
	chr9	14680000	14690000	chr9	14760000	14770000		chr22	35830000	35840000	chr22	36070000	36080000
	chr9	119290000	119300000	chr9	119410000	119420000		chr22	29940000	29950000	chr22	30480000	30490000
	chr9	95600000	95610000	chr9	95770000	95780000		chr22	48010000	48020000	chr22	48320000	48330000
	chr9	119830000	119840000	chr9	120000000	120010000		chr22	43770000	43780000	chr22	43950000	43960000
	chr9	93290000	93300000	chr9	93510000	93520000		chr22	46440000	46450000	chr22	46710000	46720000
	chr9	20620000	20630000	chr9	20850000	20860000		chr2	215670000	215680000	chr2	215820000	215830000
	chr9	81420000	81430000	chr9	81650000	81660000		chr2	242310000	242320000	chr2	242580000	242590000
	chr9	90930000	90940000	chr9	91180000	91190000		chr2	242290000	242300000	chr2	242600000	242610000
	chr9	18320000	18330000	chr9	18620000	18630000		chr2	203430000	203440000	chr2	203980000	203990000
	chr9	25340000	25350000	chr9	25710000	25720000		chr2	27180000	27190000	chr2	27390000	27400000
	chr9	21320000	21330000	chr9	24260000	24270000		chr2	189380000	189390000	chr2	190280000	190290000
	chrX	71130000	71140000	chrX	71360000	71370000		chr2	45390000	45400000	chr2	45710000	45720000
	chrX	95620000	95630000	chrX	96020000	96030000		chr2	54960000	54970000	chr2	55390000	55400000
	chrX	95650000	95660000	chrX	95920000	95930000		chr2	63020000	63030000	chr2	63410000	63420000
	chrX	14080000	14090000	chrX	14700000	14710000		chr2	63030000	63040000	chr2	63270000	63280000
	chrX	104260000	104270000	chrX	104420000	104430000		chr2	238830000	238840000	chr2	239010000	239020000
	chrX	103950000	103960000	chrX	104150000	104160000		chr2	238830000	238840000	chr2	239130000	239140000
	chrX	133300000	133310000	chrX	133500000	133510000		chr2	30550000	30560000	chr2	30890000	30900000
	chrX	46770000	46780000	chrX	46940000	46950000		chr2	163200000	163210000	chr2	163610000	163620000
	chrX	143590000	143600000	chrX	143690000	143700000		chr2	158330000	158340000	chr2	158470000	158480000
	chrX	79530000	79540000	chrX	79850000	79860000		chr2	200980000	200990000	chr2	201330000	201340000
	chrX	38630000	38640000	chrX	38960000	38970000		chr2	219140000	219150000	chr2	219430000	219440000
	chrX	77430000	77440000	chrX	77690000	77700000		chr2	153720000	153730000	chr2	154380000	154390000
	chrX	99690000	99700000	chrX	99890000	99900000		chr2	74040000	74050000	chr2	74560000	74570000
	chrX	11550000	11560000	chrX	11910000	11920000		chr2	157460000	157470000	chr2	157910000	157920000
	chrX	132930000	132940000	chrX	133150000	133160000		chr2	88650000	88660000	chr2	88870000	88880000
	chrX	76940000	76950000	chrX	77280000	77290000		chr2	209680000	209690000	chr2	210170000	210180000
	chrX	600000	610000	chrX	790000	800000		chr2	154030000	154040000	chr2	154180000	154190000
	chrX	8470000	8480000	chrX	8700000	8710000		chr2	154030000	154040000	chr2	154370000	154380000
	chrX	107050000	107060000	chrX	107230000	107240000		chr2	149860000	149870000	chr2	150250000	150260000
	chrX	7970000	7980000	chrX	8130000	8140000		chr2	236330000	236340000	chr2	236660000	236670000
	chrX	49140000	49150000	chrX	49500000	49510000		chr2	160240000	160250000	chr2	160560000	160570000
	chrX	39750000	39760000	chrX	39930000	39940000		chr2	228510000	228520000	chr2	228740000	228750000
	chrX	39770000	39780000	chrX	40010000	40020000		chr2	233620000	233630000	chr2	233890000	233900000
	chrX	93560000	93570000	chrX	93870000	93880000		chr2	159740000	159750000	chr2	160560000	160570000
	chrX	122580000	122590000	chrX	122860000	122870000		chr2	6980000	6990000	chr2	7190000	7200000
	chrX	122590000	122600000	chrX	122770000	122780000		chr2	24060000	24070000	chr2	24380000	24390000
	chrX	34930000	34940000	chrX	35450000	35460000		chr2	32780000	32790000	chr2	32990000	33000000
	chrX	49860000	49870000	chrX	50320000	50330000		chr2	212610000	212620000	chr2	213420000	213430000
	chrX	49870000	49880000	chrX	50190000	50200000		chr2	16390000	16400000	chr2	16650000	16660000
	chrX	47940000	47950000	chrX	48120000	48130000		chr2	58130000	58140000	chr2	58630000	58640000
	chrX	18610000	18620000	chrX	18910000	18920000		chr2	61260000	61270000	chr2	61400000	61410000
	chrX	128740000	128750000	chrX	129330000	129340000		chr2	160950000	160960000	chr2	161830000	161840000
	chrX	40410000	40420000	chrX	40640000	40650000		chr2	32240000	32250000	chr2	32500000	32510000
	chrX	30150000	30160000	chrX	30320000	30330000		chr2	242490000	242500000	chr2	242610000	242620000
	chrX	12990000	13000000	chrX	13300000	13310000		chr2	242490000	242500000	chr2	242670000	242680000
	chrX	8130000	8140000	chrX	8690000	8700000		chr2	73120000	73130000	chr2	73270000	73280000
	chrX	102870000	102880000	chrX	103060000	103070000		chr2	153770000	153780000	chr2	154370000	154380000
	chrX	14580000	14590000	chrX	14740000	14750000		chr2	190520000	190530000	chr2	190920000	190930000
	chrX	14130000	14140000	chrX	14230000	14240000		chr2	174900000	174910000	chr2	175190000	175200000
	chrX	38320000	38330000	chrX	38400000	38410000		chr2	161320000	161330000	chr2	161810000	161820000
	chrX	28800000	28810000	chrX	28880000	28890000		chr2	63910000	63920000	chr2	64240000	64250000
	chrX	18680000	18690000	chrX	18780000	18790000		chr2	161180000	161190000	chr2	161910000	161920000
	chrX	36760000	36770000	chrX	36840000	36850000		chr2	8930000	8940000	chr2	9260000	9270000
	chrX	122580000	122590000	chrX	122790000	122800000		chr2	27960000	27970000	chr2	28380000	28390000
	chrX	77990000	78000000	chrX	78130000	78140000		chr2	81550000	81560000	chr2	82120000	82130000
	chrX	28330000	28340000	chrX	28500000	28510000		chr2	113230000	113240000	chr2	113480000	113490000
	chrX	18430000	18440000	chrX	18590000	18600000		chr2	156850000	156860000	chr2	157170000	157180000
	chrX	141000000	141010000	chrX	141160000	141170000		chr2	230940000	230950000	chr2	231470000	231480000
	chrX	116650000	116660000	chrX	116890000	116900000		chr2	240660000	240670000	chr2	240850000	240860000
	chrX	109390000	109400000	chrX	109470000	109480000		chr2	72380000	72390000	chr2	72580000	72590000
	chrX	113990000	114000000	chrX	114180000	114190000		chr2	216200000	216210000	chr2	216690000	216700000
	chrX	104700000	104710000	chrX	104920000	104930000		chr2	205120000	205130000	chr2	206540000	206550000
	chrX	77600000	77610000	chrX	77790000	77800000		chr2	132170000	132180000	chr2	132570000	132580000
	chrX	21550000	21560000	chrX	21750000	21760000		chr2	169200000	169210000	chr2	169430000	169440000
	chrX	115640000	115650000	chrX	115780000	115790000		chr2	169210000	169220000	chr2	169470000	169480000
	chrX	81500000	81510000	chrX	81710000	81720000		chr2	102160000	102170000	chr2	102450000	102460000
	chrX	86580000	86590000	chrX	86750000	86760000		chr2	61750000	61760000	chr2	62100000	62110000
	chrX	39390000	39400000	chrX	39570000	39580000		chr2	197180000	197190000	chr2	197440000	197450000
	chrX	4470000	4480000	chrX	4870000	4880000		chr2	54350000	54360000	chr2	54640000	54650000
	chrX	70370000	70380000	chrX	70570000	70580000		chr2	26550000	26560000	chr2	26800000	26810000
	chrX	44300000	44310000	chrX	44540000	44550000		chr2	180090000	180100000	chr2	180610000	180620000
	chrX	23660000	23670000	chrX	23920000	23930000		chr2	135780000	135790000	chr2	136090000	136100000
	chrX	80350000	80360000	chrX	80630000	80640000		chr2	135760000	135770000	chr2	136290000	136300000
	chrX	120830000	120840000	chrX	121160000	121170000		chr2	135750000	135760000	chr2	136350000	136360000
	chrX	4000000	4010000	chrX	4180000	4190000		chr2	210260000	210270000	chr2	210820000	210830000
	chrX	43420000	43430000	chrX	43680000	43690000		chr2	28100000	28110000	chr2	28610000	28620000
	chrX	118370000	118380000	chrX	118600000	118610000		chr2	42740000	42750000	chr2	42970000	42980000
	chrX	100690000	100700000	chrX	100980000	100990000		chr2	239170000	239180000	chr2	239340000	239350000
	chrX	18580000	18590000	chrX	18910000	18920000		chr2	172440000	172450000	chr2	172630000	172640000
	chrX	49140000	49150000	chrX	49400000	49410000		chr2	160940000	160950000	chr2	161080000	161090000
	chrX	150330000	150340000	chrX	150690000	150700000		chr2	99800000	99810000	chr2	99980000	99990000
	chrX	134780000	134790000	chrX	135010000	135020000		chr2	198310000	198320000	chr2	198560000	198570000
	chrX	14210000	14220000	chrX	14520000	14530000		chr2	47530000	47540000	chr2	47610000	47620000
	chrX	45680000	45690000	chrX	46030000	46040000		chr2	138230000	138240000	chr2	138320000	138330000
	chrX	6140000	6150000	chrX	6220000	6230000		chr2	166430000	166440000	chr2	166720000	166730000
	chrX	68440000	68450000	chrX	68520000	68530000		chr2	231970000	231980000	chr2	232210000	232220000
	chrX	78050000	78060000	chrX	78130000	78140000		chr2	163210000	163220000	chr2	163670000	163680000
	chrX	107130000	107140000	chrX	107210000	107220000		chr2	192570000	192580000	chr2	193020000	193030000
	chrX	8010000	8020000	chrX	8130000	8140000		chr2	196210000	196220000	chr2	196420000	196430000
	chrX	12820000	12830000	chrX	12960000	12970000		chr2	135760000	135770000	chr2	136030000	136040000
	chrX	24870000	24880000	chrX	25030000	25040000		chr2	207790000	207800000	chr2	208330000	208340000
	chrX	128290000	128300000	chrX	128480000	128490000		chr2	390000	400000	chr2	630000	640000
	chrX	133290000	133300000	chrX	133540000	133550000		chr2	153780000	153790000	chr2	154060000	154070000
	chrX	93560000	93570000	chrX	93820000	93830000		chr2	45470000	45480000	chr2	45710000	45720000
	chrX	19070000	19080000	chrX	19350000	19360000		chr2	131690000	131700000	chr2	131860000	131870000
	chrX	77390000	77400000	chrX	77690000	77700000		chr2	207920000	207930000	chr2	208340000	208350000
	chrX	76290000	76300000	chrX	76620000	76630000		chr2	169250000	169260000	chr2	169770000	169780000
	chrX	45690000	45700000	chrX	46100000	46110000		chr2	177560000	177570000	chr2	178000000	178010000
	chrX	131770000	131780000	chrX	132350000	132360000		chr2	156930000	156940000	chr2	157190000	157200000
	chr10	124930000	124940000	chr10	125320000	125330000		chr2	197760000	197770000	chr2	197950000	197960000
	chr10	44170000	44180000	chr10	44490000	44500000		chr2	150970000	150980000	chr2	151320000	151330000
	chr10	89620000	89630000	chr10	90090000	90100000		chr2	208610000	208620000	chr2	208960000	208970000
	chr10	96380000	96390000	chr10	96990000	97000000		chr2	168770000	168780000	chr2	168960000	168970000
	chr10	23470000	23480000	chr10	23930000	23940000		chr2	50000	60000	chr2	270000	280000
	chr10	49560000	49570000	chr10	49800000	49810000		chr2	158890000	158900000	chr2	159260000	159270000
	chr11	118050000	118060000	chr11	118370000	118380000		chr2	55480000	55490000	chr2	55830000	55840000
	chr11	86170000	86180000	chr11	86380000	86390000		chr2	158920000	158930000	chr2	159130000	159140000
	chr11	26340000	26350000	chr11	26540000	26550000		chr2	169210000	169220000	chr2	169500000	169510000
	chr11	87180000	87190000	chr11	87410000	87420000		chr2	69670000	69680000	chr2	69920000	69930000
	chr11	75620000	75630000	chr11	75940000	75950000		chr2	99880000	99890000	chr2	100120000	100130000
	chr11	124970000	124980000	chr11	125220000	125230000		chr2	15040000	15050000	chr2	15120000	15130000
	chr11	119980000	119990000	chr11	120170000	120180000		chr2	81700000	81710000	chr2	81830000	81840000
	chr11	134460000	134470000	chr11	134670000	134680000		chr2	179820000	179830000	chr2	179950000	179960000
	chr12	33100000	33110000	chr12	33520000	33530000		chr2	209040000	209050000	chr2	209210000	209220000
	chr13	80660000	80670000	chr13	80910000	80920000		chr2	71450000	71460000	chr2	71630000	71640000
	chr14	37720000	37730000	chr14	37890000	37900000		chr2	209670000	209680000	chr2	209850000	209860000
	chr14	37720000	37730000	chr14	37980000	37990000		chr2	139060000	139070000	chr2	139250000	139260000
	chr14	71600000	71610000	chr14	71980000	71990000		chr2	170380000	170390000	chr2	170680000	170690000
	chr14	33050000	33060000	chr14	33230000	33240000		chr2	73530000	73540000	chr2	73850000	73860000
	chr15	95600000	95610000	chr15	95790000	95800000		chr2	189390000	189400000	chr2	189890000	189900000
	chr16	80570000	80580000	chr16	80710000	80720000		chr2	138700000	138710000	chr2	139260000	139270000
	chr16	69360000	69370000	chr16	69740000	69750000		chr3	167640000	167650000	chr3	167890000	167900000
	chr18	21400000	21410000	chr18	21690000	21700000		chr3	125930000	125940000	chr3	126180000	126190000
	chr18	7350000	7360000	chr18	7560000	7570000		chr3	17480000	17490000	chr3	17760000	17770000
	chr18	29940000	29950000	chr18	30120000	30130000		chr3	50720000	50730000	chr3	50990000	51000000
	chr18	7620000	7630000	chr18	7750000	7760000		chr3	194470000	194480000	chr3	194960000	194970000
	chr1	160070000	160080000	chr1	160320000	160330000		chr3	57860000	57870000	chr3	58060000	58070000
	chr1	18270000	18280000	chr1	18550000	18560000		chr3	45790000	45800000	chr3	46120000	46130000
	chr1	71170000	71180000	chr1	71350000	71360000		chr3	31660000	31670000	chr3	32030000	32040000
	chr1	119920000	119930000	chr1	120090000	120100000		chr3	61550000	61560000	chr3	61830000	61840000
	chr1	29820000	29830000	chr1	30200000	30210000		chr3	45550000	45560000	chr3	45780000	45790000
	chr1	211570000	211580000	chr1	211820000	211830000		chr3	196990000	197000000	chr3	197300000	197310000
	chr1	192620000	192630000	chr1	192990000	193000000		chr3	196950000	196960000	chr3	197310000	197320000
	chr1	50630000	50640000	chr1	50720000	50730000		chr3	147070000	147080000	chr3	147330000	147340000
	chr1	18670000	18680000	chr1	18890000	18900000		chr3	9840000	9850000	chr3	10070000	10080000
	chr1	75800000	75810000	chr1	76090000	76100000		chr3	192750000	192760000	chr3	193280000	193290000
	chr20	42390000	42400000	chr20	42620000	42630000		chr3	106830000	106840000	chr3	106910000	106920000
	chr20	23650000	23660000	chr20	23860000	23870000		chr3	196270000	196280000	chr3	196530000	196540000
	chr20	7900000	7910000	chr20	8690000	8700000		chr3	42020000	42030000	chr3	42230000	42240000
	chr21	31910000	31920000	chr21	32060000	32070000		chr3	106320000	106330000	chr3	106780000	106790000
	chr2	67700000	67710000	chr2	67880000	67890000		chr3	49940000	49950000	chr3	50120000	50130000
	chr2	20140000	20150000	chr2	20450000	20460000		chr3	172080000	172090000	chr3	172370000	172380000
	chr2	217550000	217560000	chr2	218610000	218620000		chr3	12660000	12670000	chr3	12860000	12870000
	chr2	223840000	223850000	chr2	224150000	224160000		chr3	23240000	23250000	chr3	23840000	23850000
	chr2	162440000	162450000	chr2	162960000	162970000		chr3	23230000	23240000	chr3	23540000	23550000
	chr2	14430000	14440000	chr2	14660000	14670000		chr3	159040000	159050000	chr3	159520000	159530000
	chr2	158890000	158900000	chr2	159490000	159500000		chr3	132780000	132790000	chr3	133130000	133140000
	chr2	45440000	45450000	chr2	45660000	45670000		chr3	171750000	171760000	chr3	172030000	172040000
	chr2	157510000	157520000	chr2	157740000	157750000		chr3	130740000	130750000	chr3	131210000	131220000
	chr2	152590000	152600000	chr2	152870000	152880000		chr3	15310000	15320000	chr3	15590000	15600000
	chr2	221360000	221370000	chr2	221530000	221540000		chr3	183740000	183750000	chr3	183910000	183920000
	chr2	38150000	38160000	chr2	38330000	38340000		chr3	192290000	192300000	chr3	192750000	192760000
	chr2	88570000	88580000	chr2	88750000	88760000		chr3	22610000	22620000	chr3	23000000	23010000
	chr2	218170000	218180000	chr2	218370000	218380000		chr3	189830000	189840000	chr3	190020000	190030000
	chr2	205330000	205340000	chr2	205550000	205560000		chr3	58430000	58440000	chr3	58600000	58610000
	chr2	8590000	8600000	chr2	8820000	8830000		chr3	197400000	197410000	chr3	197480000	197490000
	chr3	45970000	45980000	chr3	46200000	46210000		chr3	50550000	50560000	chr3	50640000	50650000
	chr3	168250000	168260000	chr3	168550000	168560000		chr3	4690000	4700000	chr3	4770000	4780000
	chr3	192530000	192540000	chr3	192810000	192820000		chr3	118950000	118960000	chr3	119030000	119040000
	chr3	187450000	187460000	chr3	188000000	188010000		chr3	49070000	49080000	chr3	49200000	49210000
	chr3	30810000	30820000	chr3	31000000	31010000		chr3	62060000	62070000	chr3	62140000	62150000
	chr3	158290000	158300000	chr3	158510000	158520000		chr3	107740000	107750000	chr3	107930000	107940000
	chr3	176820000	176830000	chr3	177080000	177090000		chr3	94740000	94750000	chr3	94980000	94990000
	chr3	39700000	39710000	chr3	40220000	40230000		chr3	195750000	195760000	chr3	196030000	196040000
	chr3	117910000	117920000	chr3	118340000	118350000		chr3	174840000	174850000	chr3	174930000	174940000
	chr3	128690000	128700000	chr3	128970000	128980000		chr3	37830000	37840000	chr3	38020000	38030000
	chr3	97570000	97580000	chr3	97740000	97750000		chr3	66320000	66330000	chr3	66810000	66820000
	chr4	94710000	94720000	chr4	95140000	95150000		chr3	26140000	26150000	chr3	26300000	26310000
	chr4	156490000	156500000	chr4	156690000	156700000		chr3	23470000	23480000	chr3	23840000	23850000
	chr4	55860000	55870000	chr4	56120000	56130000		chr3	145920000	145930000	chr3	146110000	146120000
	chr4	102740000	102750000	chr4	103170000	103180000		chr3	157340000	157350000	chr3	157680000	157690000
	chr5	127100000	127110000	chr5	127410000	127420000		chr3	194410000	194420000	chr3	194760000	194770000
	chr5	55720000	55730000	chr5	56110000	56120000		chr3	170140000	170150000	chr3	170470000	170480000
	chr5	121850000	121860000	chr5	122160000	122170000		chr3	105410000	105420000	chr3	105810000	105820000
	chr5	920000	930000	chr5	1090000	1100000		chr3	194640000	194650000	chr3	194820000	194830000
	chr5	90320000	90330000	chr5	90680000	90690000		chr3	16720000	16730000	chr3	16920000	16930000
	chr5	56600000	56610000	chr5	56850000	56860000		chr3	26550000	26560000	chr3	26750000	26760000
	chr5	147770000	147780000	chr5	148090000	148100000		chr3	36500000	36510000	chr3	36730000	36740000
	chr6	108430000	108440000	chr6	108660000	108670000		chr3	22600000	22610000	chr3	22950000	22960000
	chr6	164190000	164200000	chr6	164370000	164380000		chr3	180490000	180500000	chr3	180880000	180890000
	chr6	35820000	35830000	chr6	36060000	36070000		chr3	71140000	71150000	chr3	71630000	71640000
	chr6	1610000	1620000	chr6	1880000	1890000		chr4	124040000	124050000	chr4	124660000	124670000
	chr6	36980000	36990000	chr6	37250000	37260000		chr4	54060000	54070000	chr4	54760000	54770000
	chr6	84590000	84600000	chr6	84780000	84790000		chr4	184000000	184010000	chr4	184300000	184310000
	chr6	10190000	10200000	chr6	10410000	10420000		chr4	113180000	113190000	chr4	113430000	113440000
	chr6	19830000	19840000	chr6	20050000	20060000		chr4	164590000	164600000	chr4	164900000	164910000
	chr7	46430000	46440000	chr7	46690000	46700000		chr4	122820000	122830000	chr4	123480000	123490000
	chr7	27630000	27640000	chr7	27970000	27980000		chr4	122800000	122810000	chr4	123130000	123140000
	chr7	142490000	142500000	chr7	142700000	142710000		chr4	6250000	6260000	chr4	6550000	6560000
	chr7	46680000	46690000	chr7	47130000	47140000		chr4	55180000	55190000	chr4	55600000	55610000
	chr7	27320000	27330000	chr7	27610000	27620000		chr4	107960000	107970000	chr4	108270000	108280000
	chr7	45270000	45280000	chr7	45630000	45640000		chr4	7220000	7230000	chr4	7720000	7730000
	chr8	420000	430000	chr8	560000	570000		chr4	125630000	125640000	chr4	126020000	126030000
	chr8	18770000	18780000	chr8	18950000	18960000		chr4	184390000	184400000	chr4	184640000	184650000
	chr8	122270000	122280000	chr8	122500000	122510000		chr4	38770000	38780000	chr4	39140000	39150000
	chr8	111560000	111570000	chr8	111660000	111670000		chr4	39700000	39710000	chr4	39950000	39960000
	chr8	61080000	61090000	chr8	61310000	61320000		chr4	157380000	157390000	chr4	157970000	157980000
	chr8	81670000	81680000	chr8	81890000	81900000		chr4	105790000	105800000	chr4	106150000	106160000
	chr8	2030000	2040000	chr8	2230000	2240000		chr4	153340000	153350000	chr4	153630000	153640000
	chr8	141830000	141840000	chr8	142210000	142220000		chr4	88610000	88620000	chr4	88880000	88890000
	chr9	37920000	37930000	chr9	38150000	38160000		chr4	103720000	103730000	chr4	104000000	104010000
	chr9	107610000	107620000	chr9	108180000	108190000		chr4	53410000	53420000	chr4	53750000	53760000
	chr9	12760000	12770000	chr9	12950000	12960000		chr4	56170000	56180000	chr4	56600000	56610000
	chr9	114850000	114860000	chr9	115230000	115240000		chr4	108110000	108120000	chr4	108270000	108280000
	chr9	95910000	95920000	chr9	96250000	96260000		chr4	24580000	24590000	chr4	24980000	24990000
	chr9	98590000	98600000	chr9	98970000	98980000		chr4	38050000	38060000	chr4	38780000	38790000
	chr9	103470000	103480000	chr9	103660000	103670000		chr4	3550000	3560000	chr4	3870000	3880000
	chr9	90020000	90030000	chr9	90260000	90270000		chr4	104400000	104410000	chr4	104670000	104680000
	chr9	80050000	80060000	chr9	80310000	80320000		chr4	54650000	54660000	chr4	55110000	55120000
	chr9	37910000	37920000	chr9	38210000	38220000		chr4	77090000	77100000	chr4	77410000	77420000
	chrX	31050000	31060000	chrX	31330000	31340000		chr4	119890000	119900000	chr4	120380000	120390000
	chrX	12960000	12970000	chrX	13260000	13270000		chr4	24710000	24720000	chr4	24970000	24980000
	chrX	16460000	16470000	chrX	16650000	16660000		chr4	69130000	69140000	chr4	69530000	69540000
	chrX	135600000	135610000	chrX	135770000	135780000		chr4	139010000	139020000	chr4	139590000	139600000
	chr10	58920000	58930000	chr10	59050000	59060000		chr4	168530000	168540000	chr4	168990000	169000000
	chr10	33300000	33310000	chr10	33530000	33540000		chr4	37600000	37610000	chr4	38020000	38030000
	chr10	44190000	44200000	chr10	44370000	44380000		chr4	74310000	74320000	chr4	74510000	74520000
	chr10	45210000	45220000	chr10	45320000	45330000		chr4	112570000	112580000	chr4	112830000	112840000
	chr10	33630000	33640000	chr10	34090000	34100000		chr4	186550000	186560000	chr4	187050000	187060000
	chr10	31510000	31520000	chr10	31680000	31690000		chr4	1730000	1740000	chr4	1890000	1900000
	chr10	9020000	9030000	chr10	9240000	9250000		chr4	145620000	145630000	chr4	145970000	145980000
	chr10	68560000	68570000	chr10	68680000	68690000		chr4	40320000	40330000	chr4	40700000	40710000
	chr10	119680000	119690000	chr10	119860000	119870000		chr4	114300000	114310000	chr4	114980000	114990000
	chr10	28970000	28980000	chr10	29170000	29180000		chr4	185960000	185970000	chr4	186100000	186110000
	chr10	28930000	28940000	chr10	29720000	29730000		chr4	36000000	36010000	chr4	36090000	36100000
	chr10	49920000	49930000	chr10	50080000	50090000		chr4	60310000	60320000	chr4	60490000	60500000
	chr10	49560000	49570000	chr10	49810000	49820000		chr4	90740000	90750000	chr4	90820000	90830000
	chr10	35920000	35930000	chr10	36070000	36080000		chr4	117690000	117700000	chr4	117780000	117790000
	chr10	31370000	31380000	chr10	31750000	31760000		chr4	152930000	152940000	chr4	153280000	153290000
	chr10	98900000	98910000	chr10	99100000	99110000		chr4	153680000	153690000	chr4	154020000	154030000
	chr10	68470000	68480000	chr10	68670000	68680000		chr4	102440000	102450000	chr4	102630000	102640000
	chr10	32130000	32140000	chr10	32500000	32510000		chr4	81500000	81510000	chr4	81900000	81910000
	chr10	44900000	44910000	chr10	45010000	45020000		chr4	164860000	164870000	chr4	165650000	165660000
	chr10	72880000	72890000	chr10	73040000	73050000		chr4	188540000	188550000	chr4	188890000	188900000
	chr10	45000000	45010000	chr10	45350000	45360000		chr4	54060000	54070000	chr4	54290000	54300000
	chr10	5260000	5270000	chr10	5400000	5410000		chr4	38060000	38070000	chr4	38240000	38250000
	chr10	84660000	84670000	chr10	84750000	84760000		chr4	83440000	83450000	chr4	83740000	83750000
	chr10	129440000	129450000	chr10	129650000	129660000		chr4	59530000	59540000	chr4	59700000	59710000
	chr10	97620000	97630000	chr10	97740000	97750000		chr4	169120000	169130000	chr4	169320000	169330000
	chr10	68810000	68820000	chr10	69060000	69070000		chr4	72590000	72600000	chr4	72790000	72800000
	chr10	31080000	31090000	chr10	31240000	31250000		chr4	106740000	106750000	chr4	107120000	107130000
	chr10	89280000	89290000	chr10	89570000	89580000		chr4	5580000	5590000	chr4	5790000	5800000
	chr10	128450000	128460000	chr10	128610000	128620000		chr4	71610000	71620000	chr4	71870000	71880000
	chr10	53270000	53280000	chr10	53540000	53550000		chr4	121630000	121640000	chr4	122010000	122020000
	chr10	96380000	96390000	chr10	96720000	96730000		chr4	72240000	72250000	chr4	72560000	72570000
	chr10	57900000	57910000	chr10	58070000	58080000		chr4	70100000	70110000	chr4	70320000	70330000
	chr10	45740000	45750000	chr10	45870000	45880000		chr4	13660000	13670000	chr4	14000000	14010000
	chr10	49870000	49880000	chr10	50050000	50060000		chr4	99390000	99400000	chr4	99760000	99770000
	chr10	27850000	27860000	chr10	28240000	28250000		chr4	44220000	44230000	chr4	44400000	44410000
	chr11	60270000	60280000	chr11	60430000	60440000		chr4	15710000	15720000	chr4	15790000	15800000
	chr11	30160000	30170000	chr11	30310000	30320000		chr4	40910000	40920000	chr4	40990000	41000000
	chr11	92280000	92290000	chr11	92620000	92630000		chr4	140410000	140420000	chr4	140570000	140580000
	chr11	4210000	4220000	chr11	4630000	4640000		chr4	15670000	15680000	chr4	15880000	15890000
	chr11	91000000	91010000	chr11	91230000	91240000		chr4	188300000	188310000	chr4	188510000	188520000
	chr11	77810000	77820000	chr11	77910000	77920000		chr4	95790000	95800000	chr4	96010000	96020000
	chr11	59590000	59600000	chr11	59770000	59780000		chr4	3230000	3240000	chr4	3460000	3470000
	chr11	34720000	34730000	chr11	34900000	34910000		chr4	67180000	67190000	chr4	67550000	67560000
	chr11	13500000	13510000	chr11	13620000	13630000		chr4	165190000	165200000	chr4	165640000	165650000
	chr11	104130000	104140000	chr11	104280000	104290000		chr4	2220000	2230000	chr4	2710000	2720000
	chr11	93770000	93780000	chr11	93950000	93960000		chr4	165060000	165070000	chr4	165640000	165650000
	chr11	83570000	83580000	chr11	83820000	83830000		chr5	114580000	114590000	chr5	114910000	114920000
	chr11	51210000	51220000	chr11	51410000	51420000		chr5	80720000	80730000	chr5	81540000	81550000
	chr11	4410000	4420000	chr11	4620000	4630000		chr5	80010000	80020000	chr5	80180000	80190000
	chr11	59700000	59710000	chr11	59940000	59950000		chr5	176530000	176540000	chr5	176770000	176780000
	chr11	109050000	109060000	chr11	109360000	109370000		chr5	58480000	58490000	chr5	59080000	59090000
	chr11	4210000	4220000	chr11	5020000	5030000		chr5	121840000	121850000	chr5	122240000	122250000
	chr12	51150000	51160000	chr12	51320000	51330000		chr5	110500000	110510000	chr5	110690000	110700000
	chr12	46670000	46680000	chr12	47330000	47340000		chr5	179800000	179810000	chr5	180040000	180050000
	chr12	33250000	33260000	chr12	33440000	33450000		chr5	81170000	81180000	chr5	81390000	81400000
	chr12	68060000	68070000	chr12	68200000	68210000		chr5	108010000	108020000	chr5	108780000	108790000
	chr12	22340000	22350000	chr12	22610000	22620000		chr5	118390000	118400000	chr5	118670000	118680000
	chr12	92300000	92310000	chr12	92520000	92530000		chr5	138900000	138910000	chr5	139140000	139150000
	chr12	44890000	44900000	chr12	45050000	45060000		chr5	130180000	130190000	chr5	130420000	130430000
	chr12	59870000	59880000	chr12	59980000	59990000		chr5	43710000	43720000	chr5	44330000	44340000
	chr12	37960000	37970000	chr12	38100000	38110000		chr5	133530000	133540000	chr5	133710000	133720000
	chr12	91500000	91510000	chr12	91640000	91650000		chr5	142780000	142790000	chr5	143350000	143360000
	chr13	85480000	85490000	chr13	85890000	85900000		chr5	64930000	64940000	chr5	65350000	65360000
	chr13	44140000	44150000	chr13	44360000	44370000		chr5	133380000	133390000	chr5	133620000	133630000
	chr13	106870000	106880000	chr13	107140000	107150000		chr5	113000000	113010000	chr5	113790000	113800000
	chr13	75430000	75440000	chr13	75690000	75700000		chr5	130940000	130950000	chr5	131130000	131140000
	chr13	107440000	107450000	chr13	107550000	107560000		chr5	81260000	81270000	chr5	81440000	81450000
	chr13	99530000	99540000	chr13	99730000	99740000		chr5	40030000	40040000	chr5	40690000	40700000
	chr13	105900000	105910000	chr13	106140000	106150000		chr5	103140000	103150000	chr5	103730000	103740000
	chr13	110530000	110540000	chr13	110650000	110660000		chr5	73410000	73420000	chr5	73860000	73870000
	chr13	95360000	95370000	chr13	95620000	95630000		chr5	82380000	82390000	chr5	82850000	82860000
	chr13	24980000	24990000	chr13	25550000	25560000		chr5	112350000	112360000	chr5	112840000	112850000
	chr13	35780000	35790000	chr13	36230000	36240000		chr5	170910000	170920000	chr5	171320000	171330000
	chr13	37670000	37680000	chr13	37850000	37860000		chr5	174400000	174410000	chr5	174740000	174750000
	chr13	104540000	104550000	chr13	104640000	104650000		chr5	49550000	49560000	chr5	49640000	49650000
	chr13	98790000	98800000	chr13	98970000	98980000		chr5	160940000	160950000	chr5	161030000	161040000
	chr13	26850000	26860000	chr13	27060000	27070000		chr5	102010000	102020000	chr5	102250000	102260000
	chr13	31620000	31630000	chr13	31770000	31780000		chr5	58890000	58900000	chr5	59080000	59090000
	chr13	55010000	55020000	chr13	55310000	55320000		chr5	110100000	110110000	chr5	110250000	110260000
	chr13	69930000	69940000	chr13	70040000	70050000		chr5	102000000	102010000	chr5	102310000	102320000
	chr13	71890000	71900000	chr13	72090000	72100000		chr5	95200000	95210000	chr5	95570000	95580000
	chr13	19260000	19270000	chr13	19870000	19880000		chr5	102520000	102530000	chr5	102820000	102830000
	chr13	29700000	29710000	chr13	29930000	29940000		chr5	90310000	90320000	chr5	90700000	90710000
	chr13	28820000	28830000	chr13	29230000	29240000		chr5	170850000	170860000	chr5	171220000	171230000
	chr13	80520000	80530000	chr13	80920000	80930000		chr5	59130000	59140000	chr5	59290000	59300000
	chr13	85550000	85560000	chr13	85820000	85830000		chr5	118480000	118490000	chr5	118740000	118750000
	chr14	81050000	81060000	chr14	81180000	81190000		chr5	117600000	117610000	chr5	117930000	117940000
	chr14	27270000	27280000	chr14	27440000	27450000		chr5	142780000	142790000	chr5	142900000	142910000
	chr14	34480000	34490000	chr14	34760000	34770000		chr5	140610000	140620000	chr5	140860000	140870000
	chr14	37850000	37860000	chr14	38040000	38050000		chr6	31530000	31540000	chr6	31730000	31740000
	chr15	86430000	86440000	chr15	86530000	86540000		chr6	6680000	6690000	chr6	7030000	7040000
	chr15	24920000	24930000	chr15	25080000	25090000		chr6	34860000	34870000	chr6	35180000	35190000
	chr16	12660000	12670000	chr16	12980000	12990000		chr6	8690000	8700000	chr6	8960000	8970000
	chr16	73590000	73600000	chr16	74060000	74070000		chr6	1620000	1630000	chr6	1840000	1850000
	chr16	9840000	9850000	chr16	10010000	10020000		chr6	4530000	4540000	chr6	4770000	4780000
	chr16	55970000	55980000	chr16	56220000	56230000		chr6	26180000	26190000	chr6	26520000	26530000
	chr16	67760000	67770000	chr16	67950000	67960000		chr6	6820000	6830000	chr6	7230000	7240000
	chr16	13060000	13070000	chr16	13290000	13300000		chr6	160120000	160130000	chr6	160390000	160400000
	chr16	73410000	73420000	chr16	73550000	73560000		chr6	73330000	73340000	chr6	73650000	73660000
	chr16	2920000	2930000	chr16	3020000	3030000		chr6	73340000	73350000	chr6	73740000	73750000
	chr16	80900000	80910000	chr16	81020000	81030000		chr6	24730000	24740000	chr6	25070000	25080000
	chr16	8490000	8500000	chr16	8590000	8600000		chr6	46390000	46400000	chr6	46730000	46740000
	chr16	31600000	31610000	chr16	31760000	31770000		chr6	88300000	88310000	chr6	88480000	88490000
	chr17	2280000	2290000	chr17	2590000	2600000		chr6	36740000	36750000	chr6	37170000	37180000
	chr17	57380000	57390000	chr17	57710000	57720000		chr6	117770000	117780000	chr6	118020000	118030000
	chr17	5500000	5510000	chr17	5900000	5910000		chr6	38180000	38190000	chr6	38480000	38490000
	chr17	910000	920000	chr17	1040000	1050000		chr6	135860000	135870000	chr6	136210000	136220000
	chr17	21850000	21860000	chr17	21990000	22000000		chr6	135830000	135840000	chr6	136260000	136270000
	chr17	52030000	52040000	chr17	52250000	52260000		chr6	25620000	25630000	chr6	25880000	25890000
	chr17	45400000	45410000	chr17	45630000	45640000		chr6	11080000	11090000	chr6	11190000	11200000
	chr17	57800000	57810000	chr17	58040000	58050000		chr6	11090000	11100000	chr6	11210000	11220000
	chr18	63980000	63990000	chr18	64140000	64150000		chr6	34440000	34450000	chr6	34740000	34750000
	chr18	65970000	65980000	chr18	66280000	66290000		chr6	2190000	2200000	chr6	2460000	2470000
	chr18	14400000	14410000	chr18	14630000	14640000		chr6	129240000	129250000	chr6	129690000	129700000
	chr18	51970000	51980000	chr18	52630000	52640000		chr6	8980000	8990000	chr6	9220000	9230000
	chr18	31410000	31420000	chr18	31690000	31700000		chr6	71840000	71850000	chr6	72060000	72070000
	chr18	29960000	29970000	chr18	30120000	30130000		chr6	35550000	35560000	chr6	36060000	36070000
	chr18	42480000	42490000	chr18	42600000	42610000		chr6	32090000	32100000	chr6	32220000	32230000
	chr18	10000000	10010000	chr18	10310000	10320000		chr6	54510000	54520000	chr6	54930000	54940000
	chr18	25660000	25670000	chr18	25740000	25750000		chr6	110030000	110040000	chr6	110250000	110260000
	chr18	1160000	1170000	chr18	1490000	1500000		chr6	67670000	67680000	chr6	67750000	67760000
	chr18	26220000	26230000	chr18	26490000	26500000		chr6	1610000	1620000	chr6	2030000	2040000
	chr19	30720000	30730000	chr19	30930000	30940000		chr6	33320000	33330000	chr6	33530000	33540000
	chr1	244010000	244020000	chr1	244430000	244440000		chr6	4310000	4320000	chr6	4700000	4710000
	chr1	75880000	75890000	chr1	76010000	76020000		chr6	31860000	31870000	chr6	32080000	32090000
	chr1	76090000	76100000	chr1	76250000	76260000		chr6	2930000	2940000	chr6	3060000	3070000
	chr1	63310000	63320000	chr1	63620000	63630000		chr6	8660000	8670000	chr6	8880000	8890000
	chr1	185680000	185690000	chr1	185880000	185890000		chr6	142090000	142100000	chr6	142420000	142430000
	chr1	86070000	86080000	chr1	86310000	86320000		chr6	64620000	64630000	chr6	65040000	65050000
	chr1	230010000	230020000	chr1	230200000	230210000		chr6	110360000	110370000	chr6	110580000	110590000
	chr1	176660000	176670000	chr1	176840000	176850000		chr6	97070000	97080000	chr6	97390000	97400000
	chr1	214110000	214120000	chr1	214290000	214300000		chr6	79130000	79140000	chr6	79480000	79490000
	chr1	84600000	84610000	chr1	84820000	84830000		chr6	129920000	129930000	chr6	130140000	130150000
	chr1	196400000	196410000	chr1	196600000	196610000		chr6	129810000	129820000	chr6	129970000	129980000
	chr1	183620000	183630000	chr1	183770000	183780000		chr6	13610000	13620000	chr6	13860000	13870000
	chr1	79460000	79470000	chr1	79650000	79660000		chr6	76670000	76680000	chr6	76990000	77000000
	chr1	182870000	182880000	chr1	183250000	183260000		chr6	140090000	140100000	chr6	140300000	140310000
	chr1	194100000	194110000	chr1	194250000	194260000		chr6	14480000	14490000	chr6	14570000	14580000
	chr1	187020000	187030000	chr1	187160000	187170000		chr6	128680000	128690000	chr6	128820000	128830000
	chr1	48720000	48730000	chr1	48880000	48890000		chr6	35720000	35730000	chr6	35880000	35890000
	chr1	115950000	115960000	chr1	116130000	116140000		chr6	169560000	169570000	chr6	169760000	169770000
	chr1	15550000	15560000	chr1	15740000	15750000		chr6	143270000	143280000	chr6	143480000	143490000
	chr1	86360000	86370000	chr1	86640000	86650000		chr6	71150000	71160000	chr6	71390000	71400000
	chr20	51660000	51670000	chr20	51800000	51810000		chr6	106230000	106240000	chr6	106670000	106680000
	chr20	24550000	24560000	chr20	24680000	24690000		chr7	112560000	112570000	chr7	113060000	113070000
	chr20	14990000	15000000	chr20	15210000	15220000		chr7	140210000	140220000	chr7	140700000	140710000
	chr20	61050000	61060000	chr20	61200000	61210000		chr7	100060000	100070000	chr7	100440000	100450000
	chr20	18880000	18890000	chr20	19050000	19060000		chr7	140710000	140720000	chr7	141230000	141240000
	chr20	11550000	11560000	chr20	11680000	11690000		chr7	141660000	141670000	chr7	142000000	142010000
	chr20	9190000	9200000	chr20	9340000	9350000		chr7	35220000	35230000	chr7	35450000	35460000
	chr20	16880000	16890000	chr20	17400000	17410000		chr7	40850000	40860000	chr7	41740000	41750000
	chr21	18340000	18350000	chr21	18610000	18620000		chr7	2930000	2940000	chr7	3300000	3310000
	chr21	39070000	39080000	chr21	39260000	39270000		chr7	92320000	92330000	chr7	92510000	92520000
	chr21	24160000	24170000	chr21	24350000	24360000		chr7	830000	840000	chr7	1000000	1010000
	chr21	27710000	27720000	chr21	28070000	28080000		chr7	7010000	7020000	chr7	7350000	7360000
	chr21	25490000	25500000	chr21	25600000	25610000		chr7	130120000	130130000	chr7	130330000	130340000
	chr21	18750000	18760000	chr21	19020000	19030000		chr7	105580000	105590000	chr7	105790000	105800000
	chr21	30880000	30890000	chr21	31090000	31100000		chr7	129720000	129730000	chr7	129870000	129880000
	chr21	37780000	37790000	chr21	37930000	37940000		chr7	64430000	64440000	chr7	64770000	64780000
	chr22	17650000	17660000	chr22	17780000	17790000		chr7	95550000	95560000	chr7	96650000	96660000
	chr2	95540000	95550000	chr2	95730000	95740000		chr7	152140000	152150000	chr7	152400000	152410000
	chr2	83230000	83240000	chr2	83410000	83420000		chr7	112320000	112330000	chr7	112520000	112530000
	chr2	27980000	27990000	chr2	28490000	28500000		chr7	2040000	2050000	chr7	2240000	2250000
	chr2	14780000	14790000	chr2	15040000	15050000		chr7	2040000	2050000	chr7	2190000	2200000
	chr2	228110000	228120000	chr2	228230000	228240000		chr7	114080000	114090000	chr7	114250000	114260000
	chr2	148110000	148120000	chr2	148270000	148280000		chr7	77050000	77060000	chr7	77280000	77290000
	chr2	158880000	158890000	chr2	159120000	159130000		chr7	81840000	81850000	chr7	82190000	82200000
	chr2	56420000	56430000	chr2	56630000	56640000		chr7	14490000	14500000	chr7	14720000	14730000
	chr2	28270000	28280000	chr2	28610000	28620000		chr7	360000	370000	chr7	630000	640000
	chr2	47660000	47670000	chr2	47900000	47910000		chr7	3350000	3360000	chr7	3540000	3550000
	chr2	57770000	57780000	chr2	57930000	57940000		chr7	3350000	3360000	chr7	3680000	3690000
	chr2	86620000	86630000	chr2	86840000	86850000		chr7	55800000	55810000	chr7	56110000	56120000
	chr2	108820000	108830000	chr2	109010000	109020000		chr7	35100000	35110000	chr7	35460000	35470000
	chr2	151480000	151490000	chr2	151670000	151680000		chr7	95670000	95680000	chr7	96690000	96700000
	chr2	240990000	241000000	chr2	241130000	241140000		chr7	95700000	95710000	chr7	96620000	96630000
	chr2	149560000	149570000	chr2	149840000	149850000		chr7	129840000	129850000	chr7	130430000	130440000
	chr2	176690000	176700000	chr2	176940000	176950000		chr7	101700000	101710000	chr7	101870000	101880000
	chr2	63170000	63180000	chr2	63710000	63720000		chr7	920000	930000	chr7	1190000	1200000
	chr2	63910000	63920000	chr2	64180000	64190000		chr7	154720000	154730000	chr7	154990000	155000000
	chr2	60680000	60690000	chr2	60770000	60780000		chr7	38970000	38980000	chr7	39560000	39570000
	chr2	24630000	24640000	chr2	25080000	25090000		chr7	156950000	156960000	chr7	157130000	157140000
	chr3	177520000	177530000	chr3	177610000	177620000		chr7	66030000	66040000	chr7	66370000	66380000
	chr3	100620000	100630000	chr3	100770000	100780000		chr7	78940000	78950000	chr7	79350000	79360000
	chr3	169580000	169590000	chr3	169790000	169800000		chr7	149120000	149130000	chr7	149280000	149290000
	chr3	172690000	172700000	chr3	172820000	172830000		chr7	111480000	111490000	chr7	112040000	112050000
	chr3	169100000	169110000	chr3	169380000	169390000		chr7	23900000	23910000	chr7	24430000	24440000
	chr3	85690000	85700000	chr3	85840000	85850000		chr7	141540000	141550000	chr7	141910000	141920000
	chr3	123730000	123740000	chr3	124060000	124070000		chr7	18510000	18520000	chr7	18610000	18620000
	chr3	19250000	19260000	chr3	19900000	19910000		chr7	150830000	150840000	chr7	151040000	151050000
	chr3	79920000	79930000	chr3	80030000	80040000		chr7	110730000	110740000	chr7	110990000	111000000
	chr3	163200000	163210000	chr3	163320000	163330000		chr7	5890000	5900000	chr7	6070000	6080000
	chr3	142830000	142840000	chr3	143030000	143040000		chr7	101450000	101460000	chr7	101800000	101810000
	chr3	31180000	31190000	chr3	31330000	31340000		chr7	110730000	110740000	chr7	111040000	111050000
	chr3	18460000	18470000	chr3	18800000	18810000		chr7	155250000	155260000	chr7	155540000	155550000
	chr3	152750000	152760000	chr3	152960000	152970000		chr7	99130000	99140000	chr7	99370000	99380000
	chr3	42600000	42610000	chr3	42680000	42690000		chr7	140860000	140870000	chr7	141230000	141240000
	chr3	24040000	24050000	chr3	24130000	24140000		chr7	42290000	42300000	chr7	42480000	42490000
	chr3	106150000	106160000	chr3	106310000	106320000		chr7	48730000	48740000	chr7	48920000	48930000
	chr3	79570000	79580000	chr3	79760000	79770000		chr7	81670000	81680000	chr7	82110000	82120000
	chr3	78720000	78730000	chr3	78840000	78850000		chr7	95750000	95760000	chr7	95950000	95960000
	chr3	8040000	8050000	chr3	8130000	8140000		chr7	101620000	101630000	chr7	101880000	101890000
	chr3	145350000	145360000	chr3	145470000	145480000		chr7	87350000	87360000	chr7	87510000	87520000
	chr3	104630000	104640000	chr3	105070000	105080000		chr7	106420000	106430000	chr7	106690000	106700000
	chr3	173290000	173300000	chr3	173600000	173610000		chr7	760000	770000	chr7	910000	920000
	chr3	87560000	87570000	chr3	87660000	87670000		chr7	114560000	114570000	chr7	114860000	114870000
	chr3	171920000	171930000	chr3	172050000	172060000		chr7	97090000	97100000	chr7	97310000	97320000
	chr3	31320000	31330000	chr3	31480000	31490000		chr7	63770000	63780000	chr7	63950000	63960000
	chr3	148240000	148250000	chr3	148420000	148430000		chr7	114430000	114440000	chr7	114550000	114560000
	chr3	187630000	187640000	chr3	187890000	187900000		chr7	47310000	47320000	chr7	47520000	47530000
	chr4	135400000	135410000	chr4	135700000	135710000		chr7	24720000	24730000	chr7	25130000	25140000
	chr4	109100000	109110000	chr4	109420000	109430000		chr7	39920000	39930000	chr7	40170000	40180000
	chr4	160860000	160870000	chr4	161570000	161580000		chr7	13110000	13120000	chr7	13290000	13300000
	chr4	104720000	104730000	chr4	104900000	104910000		chr7	20820000	20830000	chr7	21280000	21290000
	chr4	163110000	163120000	chr4	163340000	163350000		chr7	1620000	1630000	chr7	2010000	2020000
	chr4	125250000	125260000	chr4	125400000	125410000		chr7	157350000	157360000	chr7	157630000	157640000
	chr4	86300000	86310000	chr4	86450000	86460000		chr7	97880000	97890000	chr7	98030000	98040000
	chr4	109840000	109850000	chr4	110000000	110010000		chr7	66210000	66220000	chr7	66370000	66380000
	chr4	70080000	70090000	chr4	70480000	70490000		chr7	123260000	123270000	chr7	123420000	123430000
	chr4	162240000	162250000	chr4	162420000	162430000		chr7	40380000	40390000	chr7	40560000	40570000
	chr4	178480000	178490000	chr4	178560000	178570000		chr7	156680000	156690000	chr7	156930000	156940000
	chr4	19910000	19920000	chr4	20060000	20070000		chr7	78540000	78550000	chr7	78800000	78810000
	chr4	186570000	186580000	chr4	186790000	186800000		chr7	94070000	94080000	chr7	94400000	94410000
	chr4	114870000	114880000	chr4	115100000	115110000		chr7	99130000	99140000	chr7	99520000	99530000
	chr4	54590000	54600000	chr4	54740000	54750000		chr7	99140000	99150000	chr7	99580000	99590000
	chr4	69340000	69350000	chr4	69730000	69740000		chr7	103240000	103250000	chr7	103800000	103810000
	chr4	152880000	152890000	chr4	153150000	153160000		chr8	48230000	48240000	chr8	48560000	48570000
	chr4	149930000	149940000	chr4	150070000	150080000		chr8	27900000	27910000	chr8	28270000	28280000
	chr4	107600000	107610000	chr4	107720000	107730000		chr8	80980000	80990000	chr8	81500000	81510000
	chr4	126500000	126510000	chr4	126650000	126660000		chr8	131150000	131160000	chr8	131540000	131550000
	chr4	111550000	111560000	chr4	111810000	111820000		chr8	41280000	41290000	chr8	41460000	41470000
	chr4	44020000	44030000	chr4	44170000	44180000		chr8	53020000	53030000	chr8	53300000	53310000
	chr4	158740000	158750000	chr4	158880000	158890000		chr8	120490000	120500000	chr8	120770000	120780000
	chr4	65180000	65190000	chr4	65330000	65340000		chr8	48310000	48320000	chr8	48640000	48650000
	chr4	101030000	101040000	chr4	101250000	101260000		chr8	106930000	106940000	chr8	107080000	107090000
	chr4	69580000	69590000	chr4	70030000	70040000		chr8	66670000	66680000	chr8	66870000	66880000
	chr4	90910000	90920000	chr4	91220000	91230000		chr8	127870000	127880000	chr8	128200000	128210000
	chr4	163190000	163200000	chr4	163370000	163380000		chr8	29390000	29400000	chr8	29710000	29720000
	chr4	43780000	43790000	chr4	44490000	44500000		chr8	95990000	96000000	chr8	96270000	96280000
	chr4	102670000	102680000	chr4	102930000	102940000		chr8	128500000	128510000	chr8	128710000	128720000
	chr4	172560000	172570000	chr4	172730000	172740000		chr8	88600000	88610000	chr8	89310000	89320000
	chr4	94160000	94170000	chr4	94300000	94310000		chr8	40130000	40140000	chr8	40540000	40550000
	chr4	23780000	23790000	chr4	23940000	23950000		chr8	29190000	29200000	chr8	30010000	30020000
	chr4	96550000	96560000	chr4	96720000	96730000		chr8	56480000	56490000	chr8	56940000	56950000
	chr4	62880000	62890000	chr4	63070000	63080000		chr8	65660000	65670000	chr8	65880000	65890000
	chr4	142440000	142450000	chr4	142630000	142640000		chr8	125560000	125570000	chr8	125730000	125740000
	chr4	97530000	97540000	chr4	97730000	97740000		chr8	22940000	22950000	chr8	23270000	23280000
	chr4	82050000	82060000	chr4	82270000	82280000		chr8	28620000	28630000	chr8	28850000	28860000
	chr4	85000000	85010000	chr4	85420000	85430000		chr8	28660000	28670000	chr8	28970000	28980000
	chr5	66540000	66550000	chr5	66720000	66730000		chr8	141680000	141690000	chr8	142180000	142190000
	chr5	65540000	65550000	chr5	65690000	65700000		chr8	15030000	15040000	chr8	15230000	15240000
	chr5	9550000	9560000	chr5	9710000	9720000		chr8	31090000	31100000	chr8	31320000	31330000
	chr5	174630000	174640000	chr5	174880000	174890000		chr8	77590000	77600000	chr8	77910000	77920000
	chr5	9230000	9240000	chr5	9330000	9340000		chr8	88700000	88710000	chr8	89310000	89320000
	chr5	39580000	39590000	chr5	39960000	39970000		chr8	99190000	99200000	chr8	99270000	99280000
	chr5	86830000	86840000	chr5	87050000	87060000		chr8	28400000	28410000	chr8	28580000	28590000
	chr5	123000000	123010000	chr5	123240000	123250000		chr8	30510000	30520000	chr8	30750000	30760000
	chr5	144420000	144430000	chr5	144590000	144600000		chr8	107360000	107370000	chr8	107550000	107560000
	chr5	97980000	97990000	chr5	98070000	98080000		chr8	141890000	141900000	chr8	142170000	142180000
	chr5	121040000	121050000	chr5	121200000	121210000		chr8	87940000	87950000	chr8	88140000	88150000
	chr5	40910000	40920000	chr5	41160000	41170000		chr8	119440000	119450000	chr8	119650000	119660000
	chr5	67310000	67320000	chr5	67520000	67530000		chr8	77600000	77610000	chr8	77760000	77770000
	chr5	174560000	174570000	chr5	174880000	174890000		chr8	87610000	87620000	chr8	87810000	87820000
	chr5	144850000	144860000	chr5	145040000	145050000		chr8	120450000	120460000	chr8	120660000	120670000
	chr5	118810000	118820000	chr5	119000000	119010000		chr8	105420000	105430000	chr8	105500000	105510000
	chr5	119090000	119100000	chr5	119250000	119260000		chr8	124380000	124390000	chr8	124460000	124470000
	chr5	102930000	102940000	chr5	103190000	103200000		chr8	100690000	100700000	chr8	100860000	100870000
	chr5	85620000	85630000	chr5	85710000	85720000		chr8	15230000	15240000	chr8	15540000	15550000
	chr5	20100000	20110000	chr5	20220000	20230000		chr9	74090000	74100000	chr9	74380000	74390000
	chr5	19240000	19250000	chr5	19370000	19380000		chr9	5880000	5890000	chr9	6310000	6320000
	chr5	143850000	143860000	chr5	144030000	144040000		chr9	22310000	22320000	chr9	22450000	22460000
	chr5	111510000	111520000	chr5	111710000	111720000		chr9	90560000	90570000	chr9	91180000	91190000
	chr6	87440000	87450000	chr6	87550000	87560000		chr9	90560000	90570000	chr9	91000000	91010000
	chr6	21220000	21230000	chr6	21380000	21390000		chr9	102060000	102070000	chr9	102500000	102510000
	chr6	137600000	137610000	chr6	137730000	137740000		chr9	103090000	103100000	chr9	103360000	103370000
	chr6	88640000	88650000	chr6	88940000	88950000		chr9	37480000	37490000	chr9	37720000	37730000
	chr6	93520000	93530000	chr6	93720000	93730000		chr9	20340000	20350000	chr9	21120000	21130000
	chr6	126330000	126340000	chr6	126650000	126660000		chr9	77810000	77820000	chr9	78480000	78490000
	chr6	72570000	72580000	chr6	72750000	72760000		chr9	138860000	138870000	chr9	139120000	139130000
	chr6	166830000	166840000	chr6	167040000	167050000		chr9	21240000	21250000	chr9	21410000	21420000
	chr6	149350000	149360000	chr6	149550000	149560000		chr9	21210000	21220000	chr9	21400000	21410000
	chr6	154460000	154470000	chr6	154960000	154970000		chr9	22000000	22010000	chr9	22230000	22240000
	chr6	169490000	169500000	chr6	169870000	169880000		chr9	22010000	22020000	chr9	22100000	22110000
	chr6	169310000	169320000	chr6	170090000	170100000		chr9	27030000	27040000	chr9	27320000	27330000
	chr6	161820000	161830000	chr6	162040000	162050000		chr9	110230000	110240000	chr9	111320000	111330000
	chr6	21960000	21970000	chr6	22110000	22120000		chr9	110230000	110240000	chr9	111510000	111520000
	chr6	146860000	146870000	chr6	147110000	147120000		chr9	110240000	110250000	chr9	111190000	111200000
	chr6	160100000	160110000	chr6	160360000	160370000		chr9	33970000	33980000	chr9	34250000	34260000
	chr6	168950000	168960000	chr6	169280000	169290000		chr9	28850000	28860000	chr9	29200000	29210000
	chr6	135520000	135530000	chr6	135740000	135750000		chr9	80070000	80080000	chr9	80740000	80750000
	chr6	120180000	120190000	chr6	120300000	120310000		chr9	76290000	76300000	chr9	77190000	77200000
	chr6	12950000	12960000	chr6	13150000	13160000		chr9	3730000	3740000	chr9	4200000	4210000
	chr6	134720000	134730000	chr6	134950000	134960000		chr9	21810000	21820000	chr9	22240000	22250000
	chr6	164090000	164100000	chr6	164370000	164380000		chr9	21810000	21820000	chr9	22120000	22130000
	chr6	147830000	147840000	chr6	148130000	148140000		chr9	21810000	21820000	chr9	22000000	22010000
	chr6	160930000	160940000	chr6	161140000	161150000		chr9	21460000	21470000	chr9	21780000	21790000
	chr6	99460000	99470000	chr6	99680000	99690000		chr9	21470000	21480000	chr9	21550000	21560000
	chr6	103790000	103800000	chr6	104110000	104120000		chr9	21460000	21470000	chr9	21710000	21720000
	chr6	163040000	163050000	chr6	163250000	163260000		chr9	37580000	37590000	chr9	37880000	37890000
	chr6	35850000	35860000	chr6	35980000	35990000		chr9	110360000	110370000	chr9	110570000	110580000
	chr6	91320000	91330000	chr6	91480000	91490000		chr9	109630000	109640000	chr9	109900000	109910000
	chr6	149500000	149510000	chr6	149660000	149670000		chr9	35620000	35630000	chr9	35870000	35880000
	chr6	168890000	168900000	chr6	169120000	169130000		chr9	131120000	131130000	chr9	131380000	131390000
	chr6	110450000	110460000	chr6	110710000	110720000		chr9	20620000	20630000	chr9	21100000	21110000
	chr6	140490000	140500000	chr6	140750000	140760000		chr9	21550000	21560000	chr9	21710000	21720000
	chr6	161160000	161170000	chr6	161460000	161470000		chr9	21550000	21560000	chr9	21680000	21690000
	chr7	65250000	65260000	chr7	65420000	65430000		chr9	5300000	5310000	chr9	5580000	5590000
	chr7	3080000	3090000	chr7	3230000	3240000		chr9	21320000	21330000	chr9	21790000	21800000
[truncated: 303 more rows]
